# Supplementary material for: Functional annotation of human long noncoding RNAs via molecular phenotyping
Source: Genome Res. 2020 Jul;30(7):1060–72. doi: 10.1101/gr.254219.119 (PMC7397864; doi:10.1101/gr.254219.119)
Supplement: Supplemental Material [file supp_gr.254219.119_Supplemental_Table_S1.xlsx]

## Sheet: Info
	Supplemental Table S1: Selected genes for ASO knockdowns and basic lncRNA targets properties.
	Table S1A. Selected genes for ASO knockdowns.			Table S1B. Properties of lncRNA Targets.
	ID	Description		ID	Description
1	KD.pubID	HGNC symbol or KD.geneSymbol otherwise	1	KD.pubID	HGNC symbol or KD.geneSymbol otherwise
2	KD.geneSymbol	gene symbol of the knockdown target	2	KD.geneSymbol	gene symbol of the targeted lncRNA
3	KD.geneID	ENSMBL gene id of the knockdown target	3	KD.geneID	ENSMBL gene id of the targeted lncRNA
4	geneClass	gene class of the knockdown target	4	geneClass	gene class of the targeted lncRNA
5	Description	classification of knockdown targets: lncRNA, positive controls etc.	5	Description	Targeted lncRNAs
6	ASO_design	number of designed ASOs	6	ASO_design	number of designed ASOs
			7	expression	CAGE expression level of the lncRNA target (TPM)
			8	specificity	specificity of the targeted lncRNA to HDF (0-1)
			9	Chr.cpm	abundance of the targeted lncRNA in the chromatin bound fraction
			10	Nuc.cpm	abundance of the targeted lncRNA in the nuclear soluble fraction
			11	Cyt.cpm	abundance of the targeted lncRNA in the cytoplasmic fraction
			12	localization	consensus localization based on the max(Chr.cpm, Cyt.cpm, Nuc.cpm)

## Sheet: Table S1A
	KD.pubID	KD.geneSymbol	KD.geneID	geneClass	Description	ASO_design
1	A1BG-AS1	A1BG-AS1	ENSG00000268895	lncRNA_divergent	Targeted lncRNA	5
2	AC004980.7	AC004980.7	ENSG00000205485	pseudogene	Targeted lncRNA	5
3	SPRY4-AS1	AC005592.2	ENSG00000231185	lncRNA_divergent	Targeted lncRNA	5
4	MAP4K3-DT	AC007246.3	ENSG00000231312	lncRNA_divergent	Targeted lncRNA	5
5	AC007773.2	AC007773.2	ENSG00000267213	lncRNA_divergent	Targeted lncRNA	5
6	MYOSLID	AC007879.7	ENSG00000229647	lncRNA_intergenic	Targeted lncRNA	10
7	AC009005.2	AC009005.2	ENSG00000267751	lncRNA_divergent	Targeted lncRNA	10
8	AC009237.8	AC009237.8	ENSG00000229689	pseudogene	Targeted lncRNA	5
9	CHROMR	AC009948.5	ENSG00000223960	lncRNA_intergenic	Targeted lncRNA	10
10	ZNF232-AS1	AC012146.7	ENSG00000234327	lncRNA_divergent	Targeted lncRNA	5
11	LINC01535	AC012309.5	ENSG00000226686	lncRNA_intergenic	Targeted lncRNA	5
12	LINC01578	AC013394.2	ENSG00000272888	lncRNA_sense_intronic	Targeted lncRNA	10
13	AC016747.3	AC016747.3	ENSG00000212978	lncRNA_divergent	Targeted lncRNA	5
14	LINC01116	AC017048.3	ENSG00000163364	lncRNA_intergenic	Targeted lncRNA	10
15	LINC01117	AC017048.4	ENSG00000224577	lncRNA_intergenic	Targeted lncRNA	10
16	AC018464.3	AC018464.3	ENSG00000234520	lncRNA_intergenic	Targeted lncRNA	5
17	LSP1P4	AC027612.6	ENSG00000143429	pseudogene	Targeted lncRNA	10
18	AC046143.3	AC046143.3	ENSG00000229334	lncRNA_divergent	Targeted lncRNA	5
19	AC084219.4	AC084219.4	ENSG00000186019	lncRNA_divergent	Targeted lncRNA	5
20	ZFAND2A-DT	AC091729.9	ENSG00000229043	lncRNA_divergent	Targeted lncRNA	10
21	ZNF529-AS1	AC092295.7	ENSG00000233527	lncRNA_divergent	Targeted lncRNA	5
22	ITGA9-AS1	AC093415.2	ENSG00000235257	lncRNA_divergent	Targeted lncRNA	5
23	AC093627.10	AC093627.10	ENSG00000240859	lncRNA_intergenic	Targeted lncRNA	5
24	AC093627.9	AC093627.9	ENSG00000242474	lncRNA_intergenic	Targeted lncRNA	5
25	RNASEH1-AS1	AC108488.3	ENSG00000234171	lncRNA_divergent	Targeted lncRNA	5
26	AC108488.4	AC108488.4	ENSG00000242282	lncRNA_sense_intronic	Targeted lncRNA	5
27	AC112721.2	AC112721.2	ENSG00000222032	lncRNA_intergenic	Targeted lncRNA	5
28	AC124789.1	AC124789.1	ENSG00000260833	lncRNA_antisense	Targeted lncRNA	10
29	AC144652.1	AC144652.1	ENSG00000273117	lncRNA_divergent	Targeted lncRNA	5
30	AHR	AHR	ENSG00000106546	coding_mRNA	Positive Control	10
31	AMZ2P1	AMZ2P1	ENSG00000214174	pseudogene	Targeted lncRNA	5
32	AP000704.5	AP000704.5	ENSG00000224790	lncRNA_divergent	Targeted lncRNA	5
33	FAM111A-DT	AP001258.4	ENSG00000245571	lncRNA_divergent	Targeted lncRNA	10
34	ARHGAP5-AS1	ARHGAP5-AS1	ENSG00000258655	lncRNA_divergent	Targeted lncRNA	5
35	BAZ2B	BAZ2B	ENSG00000123636	coding_mRNA	Positive Control	5
36	BOLA3-AS1	BOLA3-AS1	ENSG00000225439	lncRNA_divergent	Targeted lncRNA	10
37	BX322557.10	BX322557.10	ENSG00000215447	lncRNA_divergent	Targeted lncRNA	5
38	C11orf95	C11orf95	ENSG00000188070	lncRNA_divergent	Targeted lncRNA	10
39	PCOTH	C1QTNF9B-AS1	ENSG00000205861	lncRNA_divergent	Targeted lncRNA	5
40	CATG00000011013.1	CATG00000011013.1	CATG00000011013	lncRNA_antisense	Targeted lncRNA	5
41	CATG00000016989.1	CATG00000016989.1	CATG00000016989	lncRNA_intergenic	Targeted lncRNA	5
42	CATG00000017883.1	CATG00000017883.1	CATG00000017883	uncertain_coding	Positive Control	5
43	CATG00000020700.1	CATG00000020700.1	CATG00000020700	lncRNA_intergenic	Targeted lncRNA	5
44	CATG00000034824.1	CATG00000034824.1	CATG00000034824	lncRNA_antisense	Targeted lncRNA	5
45	CATG00000035089.1	CATG00000035089.1	CATG00000035089	lncRNA_intergenic	Targeted lncRNA	5
46	CATG00000073509.1	CATG00000073509.1	CATG00000073509	lncRNA_intergenic	Targeted lncRNA	5
47	CATG00000076290.1	CATG00000076290.1	CATG00000076290	lncRNA_intergenic	Targeted lncRNA	5
48	CATG00000079799.1	CATG00000079799.1	CATG00000079799	lncRNA_intergenic	Targeted lncRNA	10
49	CATG00000083589.1	CATG00000083589.1	CATG00000083589	lncRNA_intergenic	Targeted lncRNA	5
50	CATG00000089639.1	CATG00000089639.1	CATG00000089639	lncRNA_intergenic	Targeted lncRNA	10
51	CATG00000090305.1	CATG00000090305.1	CATG00000090305	uncertain_coding	Positive Control	5
52	CATG00000095991.1	CATG00000095991.1	CATG00000095991	lncRNA_divergent	Targeted lncRNA	10
53	CATG00000098665.1	CATG00000098665.1	CATG00000098665	lncRNA_antisense	Targeted lncRNA	10
54	CATG00000098831.1	CATG00000098831.1	CATG00000098831	lncRNA_antisense	Targeted lncRNA	10
55	CATG00000106837.1	CATG00000106837.1	CATG00000106837	lncRNA_intergenic	Targeted lncRNA	5
56	CATG00000108369.1	CATG00000108369.1	CATG00000108369	lncRNA_divergent	Targeted lncRNA	10
57	CATG00000117597.1	CATG00000117597.1	CATG00000117597	uncertain_coding	Positive Control	5
58	CATGC0000023317	CATGC0000023317	CATGC0000023317	lncRNA_intergenic	Targeted lncRNA	5
59	CATGE0000171943	CATGE0000171943	CATGE0000171943	lncRNA_divergent	Targeted lncRNA	5
60	CD27-AS1	CD27-AS1	ENSG00000215039	lncRNA_divergent	Targeted lncRNA	10
61	CD99P1	CD99P1	ENSG00000223773	pseudogene	Targeted lncRNA	5
62	CDKN2B-AS1	CDKN2B-AS1	ENSG00000240498	lncRNA_divergent	Positive Control	5
63	CDKN2C	CDKN2C	ENSG00000123080	coding_mRNA	Positive Control	5
64	CKMT2-AS1	CKMT2-AS1	ENSG00000247572	lncRNA_divergent	Targeted lncRNA	5
65	CLDN22	CLDN22	ENSG00000177300	coding_mRNA	Positive Control	5
66	COX10-AS1	COX10-AS1	ENSG00000236088	lncRNA_divergent	Targeted lncRNA	5
67	MIATNB	CTA-211A9.5	ENSG00000244625	lncRNA_intergenic	Targeted lncRNA	10
68	NUP50-DT	CTA-217C2.1	ENSG00000226328	lncRNA_divergent	Targeted lncRNA	5
69	CTB-31O20.2	CTB-31O20.2	ENSG00000261526	lncRNA_intergenic	Targeted lncRNA	5
70	CTB-55O6.12	CTB-55O6.12	ENSG00000267169	lncRNA_divergent	Targeted lncRNA	5
71	LINC01184	CTC-228N24.3	ENSG00000245937	lncRNA_divergent	Targeted lncRNA	10
72	TMEM220-AS1	CTC-297N7.5	ENSG00000263400	lncRNA_divergent	Targeted lncRNA	5
73	CTC-338M12.4	CTC-338M12.4	ENSG00000233937	lncRNA_divergent	Targeted lncRNA	10
74	CTC-338M12.5	CTC-338M12.5	ENSG00000250222	lncRNA_intergenic	Targeted lncRNA	10
75	CTC-459F4.3	CTC-459F4.3	ENSG00000267575	lncRNA_sense_intronic	Targeted lncRNA	5
76	ZNF56	CTC-559E9.6	ENSG00000267419	lncRNA_divergent	Targeted lncRNA	10
77	ZNF433-AS1	CTD-2006C1.2	ENSG00000219665	lncRNA_intergenic	Targeted lncRNA	10
78	CTD-2015H6.3	CTD-2015H6.3	ENSG00000249042	lncRNA_divergent	Targeted lncRNA	5
79	SCAMP1-AS1	CTD-2037K23.2	ENSG00000245556	lncRNA_divergent	Targeted lncRNA	5
80	LINC02104	CTD-2078B5.2	ENSG00000271334	lncRNA_intergenic	Targeted lncRNA	5
81	ZNF790-AS1	CTD-2162K18.5	ENSG00000267254	lncRNA_sense_intronic	Targeted lncRNA	10
82	WFDC21P	CTD-2319I12.1	ENSG00000261040	lncRNA_intergenic	Targeted lncRNA	5
83	CTD-2319I12.4	CTD-2319I12.4	ENSG00000267248	lncRNA_intergenic	Targeted lncRNA	10
84	CTD-2336O2.1	CTD-2336O2.1	ENSG00000253982	lncRNA_divergent	Targeted lncRNA	10
85	CTD-2366F13.1	CTD-2366F13.1	ENSG00000247796	lncRNA_divergent	Targeted lncRNA	5
86	CTD-2532K18.2	CTD-2532K18.2	ENSG00000251144	lncRNA_sense_intronic	Targeted lncRNA	5
87	CTD-2587H24.5	CTD-2587H24.5	ENSG00000267577	lncRNA_divergent	Targeted lncRNA	5
88	CTD-2651B20.3	CTD-2651B20.3	ENSG00000259520	lncRNA_divergent	Targeted lncRNA	10
89	ZNF528-AS1	CTD-3018O17.3	ENSG00000269834	lncRNA_divergent	Targeted lncRNA	10
90	CTD-3074O7.5	CTD-3074O7.5	ENSG00000255517	lncRNA_divergent	Targeted lncRNA	5
91	CTD-3131K8.2	CTD-3131K8.2	ENSG00000269439	lncRNA_divergent	Targeted lncRNA	10
92	CTD-3138B18.5	CTD-3138B18.5	ENSG00000268516	lncRNA_divergent	Targeted lncRNA	5
93	MHENCR	CTD-3184A7.4	ENSG00000232442	lncRNA_divergent	Targeted lncRNA	5
94	DANCR	DANCR	ENSG00000226950	lncRNA_intergenic	Targeted lncRNA	10
95	DGUOK-AS1	DGUOK-AS1	ENSG00000237883	lncRNA_intergenic	Targeted lncRNA	5
96	DLGAP1-AS1	DLGAP1-AS1	ENSG00000177337	lncRNA_antisense	Targeted lncRNA	5
97	DNAJC27-AS1	DNAJC27-AS1	ENSG00000224165	lncRNA_divergent	Targeted lncRNA	10
98	DNM3OS	DNM3OS	ENSG00000230630	lncRNA_antisense	Targeted lncRNA	10
99	NRAV	DYNLL1-AS1	ENSG00000248008	lncRNA_divergent	Targeted lncRNA	5
100	EIF3J-DT	EIF3J-AS1	ENSG00000179523	lncRNA_divergent	Targeted lncRNA	5
101	EMC7	EMC7	ENSG00000134153	coding_mRNA	Positive Control	5
102	EMX2OS	EMX2OS	ENSG00000229847	lncRNA_divergent	Targeted lncRNA	10
103	ERVK13-1	ERVK13-1	ENSG00000260565	lncRNA_intergenic	Targeted lncRNA	10
104	ERVK3-1	ERVK3-1	ENSG00000142396	lncRNA_sense_intronic	Targeted lncRNA	10
105	FBXL19-AS1	FBXL19-AS1	ENSG00000260852	lncRNA_divergent	Targeted lncRNA	10
106	FGD5-AS1	FGD5-AS1	ENSG00000225733	lncRNA_divergent	Targeted lncRNA	10
107	FLVCR1-DT	FLVCR1-AS1	ENSG00000198468	lncRNA_divergent	Targeted lncRNA	5
108	FOXN3-AS1	FOXN3-AS1	ENSG00000258920	lncRNA_divergent	Targeted lncRNA	10
109	FTX	FTX	ENSG00000230590	lncRNA_intergenic	Targeted lncRNA	10
110	GAS6-DT	GAS6-AS2	ENSG00000272695	lncRNA_divergent	Targeted lncRNA	5
111	GS1-124K5.4	GS1-124K5.4	ENSG00000237310	lncRNA_intergenic	Targeted lncRNA	10
112	OTUD6B-AS1	GS1-251I9.4	ENSG00000253738	lncRNA_divergent	Targeted lncRNA	5
113	HCG11	HCG11	ENSG00000228223	lncRNA_intergenic	Targeted lncRNA	10
114	HOTAIR	HOTAIR	ENSG00000228630	lncRNA_intergenic	Positive Control	5
115	HOXB-AS1	HOXB-AS1	ENSG00000230148	lncRNA_intergenic	Targeted lncRNA	5
116	HOXD-AS2	HOXD-AS2	ENSG00000237380	lncRNA_divergent	Targeted lncRNA	10
117	JPX	JPX	ENSG00000225470	lncRNA_intergenic	Targeted lncRNA	10
118	KANSL1-AS1	KANSL1-AS1	ENSG00000214401	lncRNA_divergent	Targeted lncRNA	5
119	KTN1-AS1	KTN1-AS1	ENSG00000186615	lncRNA_divergent	Targeted lncRNA	5
120	CYTOR	LINC00152	ENSG00000222041	lncRNA_intergenic	Targeted lncRNA	10
121	OLMALINC	LINC00263	ENSG00000235823	lncRNA_intergenic	Targeted lncRNA	10
122	LINC00339	LINC00339	ENSG00000218510	lncRNA_intergenic	Targeted lncRNA	10
123	LINC00467	LINC00467	ENSG00000153363	lncRNA_intergenic	Targeted lncRNA	5
124	SMIM26	LINC00493	ENSG00000232388	lncRNA_intergenic	Targeted lncRNA	10
125	LINC00511	LINC00511	ENSG00000227036	lncRNA_intergenic	Targeted lncRNA	10
126	LINC00517	LINC00517	ENSG00000259091	lncRNA_antisense	Targeted lncRNA	10
127	LINC00630	LINC00630	ENSG00000223546	lncRNA_sense_intronic	Targeted lncRNA	5
128	LINC00654	LINC00654	ENSG00000205181	lncRNA_intergenic	Targeted lncRNA	10
129	NORAD	LINC00657	ENSG00000260032	lncRNA_intergenic	Targeted lncRNA	10
130	LINC00662	LINC00662	ENSG00000261824	lncRNA_intergenic	Targeted lncRNA	5
131	LINC00667	LINC00667	ENSG00000263753	lncRNA_intergenic	Targeted lncRNA	10
132	LINC00674	LINC00674	ENSG00000237854	pseudogene	Targeted lncRNA	10
133	LINC00702	LINC00702	ENSG00000233117	lncRNA_intergenic	Targeted lncRNA	10
134	LINC00707	LINC00707	ENSG00000238266	lncRNA_intergenic	Targeted lncRNA	10
135	LINC00847	LINC00847	ENSG00000245060	lncRNA_divergent	Targeted lncRNA	5
136	LINC00856	LINC00856	ENSG00000230417	lncRNA_intergenic	Targeted lncRNA	5
137	LINC00862	LINC00862	ENSG00000203721	lncRNA_intergenic	Targeted lncRNA	5
138	DUBR	LINC00883	ENSG00000243701	lncRNA_intergenic	Targeted lncRNA	10
139	LINC00886	LINC00886	ENSG00000240875	lncRNA_intergenic	Targeted lncRNA	5
140	LINC00899	LINC00899	ENSG00000231711	lncRNA_divergent	Targeted lncRNA	5
141	LINC00909	LINC00909	ENSG00000264247	lncRNA_divergent	Targeted lncRNA	5
142	LINC00938	LINC00938	ENSG00000273015	lncRNA_intergenic	Targeted lncRNA	10
143	LINC00941	LINC00941	ENSG00000235884	lncRNA_intergenic	Targeted lncRNA	5
144	C10orf143	LINC00959	ENSG00000237489	lncRNA_intergenic	Targeted lncRNA	10
145	LINC00963	LINC00963	ENSG00000204054	lncRNA_intergenic	Targeted lncRNA	5
146	LINC00968	LINC00968	ENSG00000246430	lncRNA_divergent	Targeted lncRNA	10
147	LINC01023	LINC01023	ENSG00000272523	lncRNA_intergenic	Targeted lncRNA	5
148	LINC01085	LINC01085	ENSG00000248698	lncRNA_intergenic	Targeted lncRNA	5
149	PPM1F-AS1	LL22NC03-86G7.1	ENSG00000224086	lncRNA_divergent	Targeted lncRNA	5
150	LOXL1-AS1	LOXL1-AS1	ENSG00000261801	lncRNA_divergent	Targeted lncRNA	5
151	MAGI2-AS3	MAGI2-AS3	ENSG00000234456	lncRNA_divergent	Targeted lncRNA	5
152	MALAT1	MALAT1	ENSG00000251562	lncRNA_intergenic	Experimental Control	1
153	MAPKAPK5-AS1	MAPKAPK5-AS1	ENSG00000234608	lncRNA_divergent	Targeted lncRNA	10
154	MEG3	MEG3	ENSG00000214548	lncRNA_intergenic	Targeted lncRNA	10
155	MELTF-AS1	MFI2-AS1	ENSG00000228109	lncRNA_divergent	Targeted lncRNA	5
156	MIPEPP3	MIPEPP3	ENSG00000233325	pseudogene	Targeted lncRNA	5
157	MKLN1-AS	MKLN1-AS2	ENSG00000236753	lncRNA_divergent	Targeted lncRNA	10
158	MRPS31P5	MRPS31P5	ENSG00000243406	pseudogene	Targeted lncRNA	5
159	NBR2	NBR2	ENSG00000198496	pseudogene	Targeted lncRNA	5
160	NEAT1	NEAT1_1	ENSG00000245532	lncRNA_intergenic	Positive Control	1
161	NEAT1	NEAT1_2	ENSG00000245532	lncRNA_intergenic	Positive Control	1
162	NNT-AS1	NNT-AS1	ENSG00000248092	lncRNA_divergent	Targeted lncRNA	10
163	NOP14-AS1	NOP14-AS1	ENSG00000249673	lncRNA_divergent	Targeted lncRNA	5
164	NR2F1-AS1	NR2F1-AS1	ENSG00000237187	lncRNA_divergent	Targeted lncRNA	10
165	OIP5-AS1	OIP5-AS1	ENSG00000247556	lncRNA_sense_intronic	Targeted lncRNA	5
166	OSER1-DT	OSER1-AS1	ENSG00000223891	lncRNA_divergent	Targeted lncRNA	5
167	PCAT6	PCAT6	ENSG00000228288	lncRNA_intergenic	Targeted lncRNA	10
168	PITPNA-AS1	PITPNA-AS1	ENSG00000236618	lncRNA_divergent	Targeted lncRNA	10
169	PRRT3-AS1	PRRT3-AS1	ENSG00000230082	lncRNA_divergent	Targeted lncRNA	10
170	PRRX1	PRRX1	ENSG00000116132	coding_mRNA	Positive Control	5
171	PSMG3-AS1	PSMG3-AS1	ENSG00000230487	lncRNA_divergent	Targeted lncRNA	5
172	PTCHD3P1	PTCHD3P1	ENSG00000224597	lncRNA_intergenic	Targeted lncRNA	10
173	PTPRG-AS1	PTPRG-AS1	ENSG00000241472	lncRNA_divergent	Targeted lncRNA	5
174	PXN-AS1	PXN-AS1	ENSG00000255857	lncRNA_divergent	Targeted lncRNA	5
175	RAB30-DT	RAB30-AS1	ENSG00000246067	lncRNA_divergent	Targeted lncRNA	10
176	RAD51-AS1	RAD51-AS1	ENSG00000245849	lncRNA_divergent	Targeted lncRNA	10
177	RASSF8-AS1	RASSF8-AS1	ENSG00000246695	lncRNA_divergent	Targeted lncRNA	5
178	RP1-152L7.5	RP1-152L7.5	ENSG00000216775	pseudogene	Targeted lncRNA	5
179	ERICH6-AS1	RP11-103G8.2	ENSG00000240137	lncRNA_divergent	Targeted lncRNA	5
180	RP11-10K16.1	RP11-10K16.1	ENSG00000245213	lncRNA_divergent	Targeted lncRNA	10
181	RP11-110G21.1	RP11-110G21.1	ENSG00000228801	lncRNA_divergent	Targeted lncRNA	5
182	CCDC84-DT	RP11-110I1.12	ENSG00000255121	lncRNA_divergent	Targeted lncRNA	5
183	RP11-111M22.3	RP11-111M22.3	ENSG00000255135	lncRNA_divergent	Targeted lncRNA	5
184	RP11-115C21.2	RP11-115C21.2	ENSG00000246089	lncRNA_divergent	Targeted lncRNA	10
185	PPP3CB-AS1	RP11-137L10.6	ENSG00000221817	lncRNA_divergent	Targeted lncRNA	10
186	RP11-1398P2.1	RP11-1398P2.1	ENSG00000244459	lncRNA_intergenic	Targeted lncRNA	5
187	PIGBOS1	RP11-139H15.1	ENSG00000225973	lncRNA_divergent	Targeted lncRNA	10
188	RP11-149I23.3	RP11-149I23.3	ENSG00000232110	lncRNA_antisense	Targeted lncRNA	10
189	LINC01605	RP11-150O12.1	ENSG00000253161	lncRNA_intergenic	Targeted lncRNA	15
190	RP11-160O5.1	RP11-160O5.1	ENSG00000263470	lncRNA_divergent	Targeted lncRNA	5
191	LMO7-AS1	RP11-173B14.5	ENSG00000261105	lncRNA_divergent	Targeted lncRNA	10
192	RP11-195F19.9	RP11-195F19.9	ENSG00000230074	lncRNA_divergent	Targeted lncRNA	5
193	RP11-206L10.2	RP11-206L10.2	ENSG00000228327	lncRNA_intergenic	Targeted lncRNA	5
194	NINJ2-AS1	RP11-218M22.1	ENSG00000177406	lncRNA_divergent	Targeted lncRNA	5
195	RP11-220I1.1	RP11-220I1.1	ENSG00000233137	lncRNA_intergenic	Targeted lncRNA	5
196	LINC02454	RP11-221N13.3	ENSG00000256268	lncRNA_intergenic	Targeted lncRNA	10
197	ATP2A1-AS1	RP11-22P6.3	ENSG00000260442	lncRNA_divergent	Targeted lncRNA	10
198	RP11-242D8.1	RP11-242D8.1	ENSG00000267002	lncRNA_divergent	Targeted lncRNA	5
199	LINC01204	RP11-245M24.1	ENSG00000229563	lncRNA_intergenic	Targeted lncRNA	5
200	RP11-253M7.1	RP11-253M7.1	ENSG00000259426	lncRNA_divergent	Targeted lncRNA	10
201	RP11-25K19.1	RP11-25K19.1	ENSG00000167912	lncRNA_divergent	Targeted lncRNA	5
202	RP11-295G20.2	RP11-295G20.2	ENSG00000233461	lncRNA_divergent	Targeted lncRNA	10
203	PRDX6-AS1	RP11-296O14.3	ENSG00000203739	lncRNA_divergent	Targeted lncRNA	10
204	TBX2-AS1	RP11-332H18.4	ENSG00000267280	lncRNA_divergent	Targeted lncRNA	5
205	RP11-333E1.1	RP11-333E1.1	ENSG00000261879	lncRNA_divergent	Targeted lncRNA	10
206	RP11-33B1.1	RP11-33B1.1	ENSG00000245958	pseudogene	Targeted lncRNA	10
207	RP11-345P4.9	RP11-345P4.9	ENSG00000272106	lncRNA_divergent	Targeted lncRNA	5
208	LINC02762	RP11-356J5.12	ENSG00000250303	lncRNA_intergenic	Targeted lncRNA	5
209	LINC01278	RP11-357C3.3	ENSG00000235437	lncRNA_intergenic	Targeted lncRNA	5
210	RP11-379H18.1	RP11-379H18.1	ENSG00000271122	lncRNA_divergent	Targeted lncRNA	5
211	RP11-37B2.1	RP11-37B2.1	ENSG00000251136	lncRNA_divergent	Targeted lncRNA	5
212	RP11-38L15.3	RP11-38L15.3	ENSG00000231187	lncRNA_antisense	Targeted lncRNA	5
213	RP11-390P2.4	RP11-390P2.4	ENSG00000225177	lncRNA_divergent	Targeted lncRNA	5
214	MUC12-AS1	RP11-395B7.4	ENSG00000227053	lncRNA_divergent	Targeted lncRNA	5
215	RP11-398K22.12	RP11-398K22.12	ENSG00000229852	lncRNA_divergent	Targeted lncRNA	10
216	LINC01615	RP11-417E7.1	ENSG00000223485	lncRNA_intergenic	Targeted lncRNA	10
217	LINC01137	RP11-422J8.1	ENSG00000233621	lncRNA_divergent	Targeted lncRNA	5
218	RP11-428J1.5	RP11-428J1.5	ENSG00000272142	lncRNA_divergent	Targeted lncRNA	5
219	RP11-432J22.2	RP11-432J22.2	ENSG00000238058	lncRNA_divergent	Targeted lncRNA	5
220	LINC01719	RP11-458D21.1	ENSG00000233396	lncRNA_intergenic	Targeted lncRNA	5
221	FOXC2-AS1	RP11-463O9.5	ENSG00000260944	lncRNA_divergent	Targeted lncRNA	5
222	ZNF213-AS1	RP11-473M20.14	ENSG00000263072	lncRNA_divergent	Targeted lncRNA	5
223	RP11-474B16.1	RP11-474B16.1	ENSG00000257642	lncRNA_divergent	Targeted lncRNA	10
224	RP11-474P2.4	RP11-474P2.4	ENSG00000257496	lncRNA_intergenic	Targeted lncRNA	5
225	LINC01133	RP11-48O20.4	ENSG00000224259	lncRNA_intergenic	Targeted lncRNA	5
226	RP11-499E18.1	RP11-499E18.1	ENSG00000248161	lncRNA_sense_intronic	Targeted lncRNA	5
227	RP11-500C11.3	RP11-500C11.3	ENSG00000272269	lncRNA_divergent	Targeted lncRNA	10
228	RP11-517P14.2	RP11-517P14.2	ENSG00000230555	lncRNA_intergenic	Targeted lncRNA	5
229	RP11-527D7.1	RP11-527D7.1	ENSG00000225554	lncRNA_intergenic	Targeted lncRNA	10
230	LINC02482	RP11-539L10.3	ENSG00000251580	lncRNA_divergent	Targeted lncRNA	10
231	LINC02709	RP11-540A21.2	ENSG00000245522	lncRNA_intergenic	Targeted lncRNA	5
232	RP11-545E17.3	RP11-545E17.3	ENSG00000223478	lncRNA_divergent	Targeted lncRNA	10
233	LNCOG	RP11-54A9.1	ENSG00000257219	lncRNA_intergenic	Targeted lncRNA	10
234	RP11-550I24.2	RP11-550I24.2	ENSG00000243176	lncRNA_antisense	Targeted lncRNA	5
235	RP11-553K8.5	RP11-553K8.5	ENSG00000261573	lncRNA_antisense	Targeted lncRNA	10
236	PIK3CD-AS2	RP11-558F24.4	ENSG00000231789	lncRNA_divergent	Targeted lncRNA	5
237	ADAMTS7P4	RP11-561C5.5	ENSG00000218052	pseudogene	Targeted lncRNA	5
238	PRANCR	RP11-611E13.2	ENSG00000257815	lncRNA_divergent	Targeted lncRNA	10
239	GIHCG	RP11-620J15.3	ENSG00000257698	lncRNA_divergent	Targeted lncRNA	5
240	NBDY	RP11-622K12.1	ENSG00000204272	lncRNA_intergenic	Targeted lncRNA	5
241	RP11-656D10.3	RP11-656D10.3	ENSG00000238287	lncRNA_divergent	Targeted lncRNA	5
242	LINC01503	RP11-65J3.1	ENSG00000233901	lncRNA_intergenic	Targeted lncRNA	5
243	RP11-660L16.2	RP11-660L16.2	ENSG00000254682	lncRNA_divergent	Targeted lncRNA	10
244	GACAT2	RP11-674N23.1	ENSG00000265962	lncRNA_divergent	Targeted lncRNA	5
245	CASP4LP	RP11-693N9.2	ENSG00000235505	pseudogene	Targeted lncRNA	10
246	RP11-6N17.4	RP11-6N17.4	ENSG00000264920	lncRNA_divergent	Targeted lncRNA	10
247	RP11-727A23.5	RP11-727A23.5	ENSG00000247137	lncRNA_divergent	Targeted lncRNA	5
248	TMC3-AS1	RP11-761I4.3	ENSG00000259343	lncRNA_divergent	Targeted lncRNA	5
249	FRG1JP	RP11-764K9.4	ENSG00000215548	pseudogene	Targeted lncRNA	5
250	PPP1R14B-AS1	RP11-783K16.5	ENSG00000256940	lncRNA_divergent	Targeted lncRNA	5
251	LINC02381	RP11-834C11.4	ENSG00000250742	lncRNA_intergenic	Targeted lncRNA	10
252	SRP54-AS1	RP11-85K15.2	ENSG00000258704	lncRNA_divergent	Targeted lncRNA	10
253	RP11-863P13.3	RP11-863P13.3	ENSG00000261327	lncRNA_intergenic	Targeted lncRNA	10
254	RP11-879F14.2	RP11-879F14.2	ENSG00000267279	lncRNA_sense_intronic	Targeted lncRNA	5
255	LINC01569	RP11-95P2.1	ENSG00000262468	lncRNA_intergenic	Targeted lncRNA	10
256	RP11-977G19.11	RP11-977G19.11	ENSG00000257303	lncRNA_divergent	Targeted lncRNA	5
257	RP11-9M16.2	RP11-9M16.2	ENSG00000235119	short_ncRNA	Positive Control	5
258	RP13-20L14.6	RP13-20L14.6	ENSG00000265458	lncRNA_divergent	Targeted lncRNA	10
259	LASTR	RP13-463N16.6	ENSG00000242147	lncRNA_intergenic	Targeted lncRNA	5
260	MINCR	RP13-582O9.5	ENSG00000253716	lncRNA_divergent	Targeted lncRNA	5
261	TPTEP2	RP3-449O17.1	ENSG00000244627	pseudogene	Targeted lncRNA	5
262	MIR34AHG	RP3-510D11.1	ENSG00000228526	lncRNA_intergenic	Targeted lncRNA	10
263	LNCTAM34A	RP3-510D11.2	ENSG00000234546	lncRNA_divergent	Targeted lncRNA	10
264	LINC01357	RP3-522D1.1	ENSG00000224167	lncRNA_intergenic	Targeted lncRNA	5
265	ZNF337-AS1	RP4-694B14.5	ENSG00000213742	lncRNA_divergent	Targeted lncRNA	5
266	INKA2-AS1	RP4-773A18.4	ENSG00000227811	lncRNA_divergent	Targeted lncRNA	10
267	RP4-794H19.4	RP4-794H19.4	ENSG00000230812	lncRNA_intergenic	Targeted lncRNA	5
268	RP5-1050D4.5	RP5-1050D4.5	ENSG00000262227	lncRNA_divergent	Targeted lncRNA	5
269	NRSN2-AS1	RP5-1103G7.4	ENSG00000225377	lncRNA_divergent	Targeted lncRNA	10
270	ELOA-AS1	RP5-886K2.3	ENSG00000236810	lncRNA_divergent	Targeted lncRNA	10
271	PRR34-AS1	RP6-109B7.3	ENSG00000241990	lncRNA_divergent	Targeted lncRNA	5
272	MIR222HG	RP6-99M1.2	ENSG00000270069	lncRNA_intergenic	Targeted lncRNA	10
273	APTR	RSBN1L-AS1	ENSG00000214293	lncRNA_divergent	Targeted lncRNA	5
274	SBF2-AS1	SBF2-AS1	ENSG00000246273	lncRNA_antisense	Targeted lncRNA	10
275	SERTAD4-AS1	SERTAD4-AS1	ENSG00000203706	lncRNA_intergenic	Targeted lncRNA	10
276	SMURF2P1	SMURF2P1	ENSG00000248121	pseudogene	Targeted lncRNA	5
277	SNAI3-AS1	SNAI3-AS1	ENSG00000260630	lncRNA_divergent	Targeted lncRNA	5
278	SNHG18	SNHG18	ENSG00000250786	lncRNA_divergent	Targeted lncRNA	10
279	SOCS2-AS1	SOCS2-AS1	ENSG00000246985	lncRNA_divergent	Targeted lncRNA	10
280	SRP14-AS1	SRP14-AS1	ENSG00000248508	lncRNA_divergent	Targeted lncRNA	5
281	ST7-AS1	ST7-AS1	ENSG00000227199	lncRNA_divergent	Targeted lncRNA	5
282	STX18-AS1	STX18-AS1	ENSG00000247708	lncRNA_divergent	Targeted lncRNA	5
283	SUGT1P1	SUGT1P	ENSG00000226823	pseudogene	Targeted lncRNA	5
284	TERC	TERC	ENSG00000270141	lncRNA_intergenic	Targeted lncRNA	10
285	TMCC1-AS1	TMCC1-AS1	ENSG00000271270	lncRNA_divergent	Targeted lncRNA	10
286	TMEM44-AS1	TMEM44-AS1	ENSG00000231770	lncRNA_divergent	Targeted lncRNA	5
287	TMEM9B-AS1	TMEM9B-AS1	ENSG00000254860	lncRNA_divergent	Targeted lncRNA	5
288	TP53TG1	TP53TG1	ENSG00000182165	lncRNA_divergent	Targeted lncRNA	10
289	TRAM2-AS1	TRAM2-AS1	ENSG00000225791	lncRNA_divergent	Targeted lncRNA	10
290	TTN-AS1	TTN-AS1	ENSG00000237298	lncRNA_antisense	Targeted lncRNA	5
291	TUG1	TUG1	ENSG00000253352	lncRNA_divergent	Targeted lncRNA	10
292	U52111.14	U52111.14	ENSG00000232725	lncRNA_divergent	Targeted lncRNA	10
293	UBL7-AS1	UBL7-AS1	ENSG00000247240	lncRNA_divergent	Targeted lncRNA	10
294	USP46-DT	USP46-AS1	ENSG00000248866	lncRNA_divergent	Targeted lncRNA	5
295	WDFY3-AS2	WDFY3-AS2	ENSG00000180769	lncRNA_divergent	Targeted lncRNA	10
296	ZBED5-AS1	ZBED5-AS1	ENSG00000247271	lncRNA_divergent	Targeted lncRNA	5
297	ZFP62	ZFP62	ENSG00000196670	coding_mRNA	Positive Control	5
298	ZMYM2	ZMYM2	ENSG00000121741	coding_mRNA	Positive Control	5
299	ZNF131	ZNF131	ENSG00000172262	coding_mRNA	Positive Control	10
300	ZNF37BP	ZNF37BP	ENSG00000234420	pseudogene	Targeted lncRNA	10
301	ZNF667-AS1	ZNF667-AS1	ENSG00000166770	lncRNA_divergent	Targeted lncRNA	5
302	ZNF674-AS1	ZNF674-AS1	ENSG00000230844	lncRNA_divergent	Targeted lncRNA	10
303	ZNF730	ZNF730	ENSG00000183850	coding_mRNA	Positive Control	10
304	ZSCAN16-AS1	ZSCAN16-AS1	ENSG00000269293	lncRNA_intergenic	Targeted lncRNA	10

## Sheet: Table S1B
	KD.pubID	KD.geneSymbol	KD.geneID	geneClass	Description	ASO_design	expression	specificity	Chr.cpm	Nuc.cpm	Cyt.cpm	localization
1	A1BG-AS1	A1BG-AS1	ENSG00000268895	lncRNA_divergent	Targeted lncRNA	5	11.4059	0.472958	16.6821	9.62466	9.81205	Chromatin bound
2	AC004980.7	AC004980.7	ENSG00000205485	pseudogene	Targeted lncRNA	5	16.7378	0.270742	157.295	13.6312	6.30564	Chromatin bound
3	SPRY4-AS1	AC005592.2	ENSG00000231185	lncRNA_divergent	Targeted lncRNA	5	11.4691	0.354749	14.3548	3.88463	3.94894	Chromatin bound
4	MAP4K3-DT	AC007246.3	ENSG00000231312	lncRNA_divergent	Targeted lncRNA	5	14.1082	0.388693	39.6201	13.9232	17.3398	Chromatin bound
5	AC007773.2	AC007773.2	ENSG00000267213	lncRNA_divergent	Targeted lncRNA	5	2.37995	0.415716	2.58541	3.277	1.00877	Nuclear soluble
6	MYOSLID	AC007879.7	ENSG00000229647	lncRNA_intergenic	Targeted lncRNA	10	0.971483	0.468531	0.805398	0.709091	0.545485	Chromatin bound
7	AC009005.2	AC009005.2	ENSG00000267751	lncRNA_divergent	Targeted lncRNA	10	2.03298	0.268182	0.196719	0.83806	0.799492	Nuclear soluble
8	AC009237.8	AC009237.8	ENSG00000229689	pseudogene	Targeted lncRNA	5	7.89265	0.439024	15.1348	14.6016	10.7202	Chromatin bound
9	CHROMR	AC009948.5	ENSG00000223960	lncRNA_intergenic	Targeted lncRNA	10	14.0331	0.423333	15.1027	13.5762	17.953	Cytoplasmic
10	ZNF232-AS1	AC012146.7	ENSG00000234327	lncRNA_divergent	Targeted lncRNA	5	14.8839	0.490272	0.309928	0.774632	1.71909	Cytoplasmic
11	LINC01535	AC012309.5	ENSG00000226686	lncRNA_intergenic	Targeted lncRNA	5	4.20035	0.382488	5.27083	2.48712	0.765784	Chromatin bound
12	LINC01578	AC013394.2	ENSG00000272888	lncRNA_sense_intronic	Targeted lncRNA	10	52.3218	0.246377	29.1867	23.2627	32.8209	Cytoplasmic
13	AC016747.3	AC016747.3	ENSG00000212978	lncRNA_divergent	Targeted lncRNA	5	14.1254	0.55082	0.500573	1.66771	12.1139	Cytoplasmic
14	LINC01116	AC017048.3	ENSG00000163364	lncRNA_intergenic	Targeted lncRNA	10	4.80473	0.722456	1.97672	1.91833	2.76959	Cytoplasmic
15	LINC01117	AC017048.4	ENSG00000224577	lncRNA_intergenic	Targeted lncRNA	10	1.86313	0.614118	2.16391	0.998704	0.895627	Chromatin bound
16	AC018464.3	AC018464.3	ENSG00000234520	lncRNA_intergenic	Targeted lncRNA	5	0.437684	0.551867	0.137593	0	0	Chromatin bound
17	LSP1P4	AC027612.6	ENSG00000143429	pseudogene	Targeted lncRNA	10	70.6053	0.549091	3.04395	7.5096	13.2824	Cytoplasmic
18	AC046143.3	AC046143.3	ENSG00000229334	lncRNA_divergent	Targeted lncRNA	5	1.90632	0.719029	0.209056	0.561972	1.13475	Cytoplasmic
19	AC084219.4	AC084219.4	ENSG00000186019	lncRNA_divergent	Targeted lncRNA	5	1.93607	0.435504	0.305697	1.32931	1.34513	Cytoplasmic
20	ZFAND2A-DT	AC091729.9	ENSG00000229043	lncRNA_divergent	Targeted lncRNA	10	7.11433	0.42364	2.98282	6.00714	3.04927	Nuclear soluble
21	ZNF529-AS1	AC092295.7	ENSG00000233527	lncRNA_divergent	Targeted lncRNA	5	8.61889	0.42326	11.1848	7.48673	3.58977	Chromatin bound
22	ITGA9-AS1	AC093415.2	ENSG00000235257	lncRNA_divergent	Targeted lncRNA	5	9.31224	0.354918	9.95561	2.93709	4.79337	Chromatin bound
23	AC093627.10	AC093627.10	ENSG00000240859	lncRNA_intergenic	Targeted lncRNA	5	2.22814	0.284956	0.615873	1.71754	2.15676	Cytoplasmic
24	AC093627.9	AC093627.9	ENSG00000242474	lncRNA_intergenic	Targeted lncRNA	5	3.57856	0.356021	1.50767	2.55529	1.90178	Nuclear soluble
25	RNASEH1-AS1	AC108488.3	ENSG00000234171	lncRNA_divergent	Targeted lncRNA	5	18.2942	0.522782	1.22607	3.95919	9.78273	Cytoplasmic
26	AC108488.4	AC108488.4	ENSG00000242282	lncRNA_sense_intronic	Targeted lncRNA	5	2.24066	0.493976	0.631308	0	0.366029	Chromatin bound
27	AC112721.2	AC112721.2	ENSG00000222032	lncRNA_intergenic	Targeted lncRNA	5	2.64418	0.425373	0	0	0	other
28	AC124789.1	AC124789.1	ENSG00000260833	lncRNA_antisense	Targeted lncRNA	10	20.4297	0.709799	3.44201	10.9891	10.0631	Nuclear soluble
29	AC144652.1	AC144652.1	ENSG00000273117	lncRNA_divergent	Targeted lncRNA	5	2.86134	0.210863	0.562214	3.20064	3.08355	Nuclear soluble
30	AMZ2P1	AMZ2P1	ENSG00000214174	pseudogene	Targeted lncRNA	5	5.07754	0.251082	18.1433	8.50967	4.24456	Chromatin bound
31	AP000704.5	AP000704.5	ENSG00000224790	lncRNA_divergent	Targeted lncRNA	5	1.8417	0.350769	1.66431	2.61179	1.02089	Nuclear soluble
32	FAM111A-DT	AP001258.4	ENSG00000245571	lncRNA_divergent	Targeted lncRNA	10	0.178839	0.155738	5.32595	5.01286	5.62646	Cytoplasmic
33	ARHGAP5-AS1	ARHGAP5-AS1	ENSG00000258655	lncRNA_divergent	Targeted lncRNA	5	1.57872	0.289941	0.246369	1.20791	2.03466	Cytoplasmic
34	BOLA3-AS1	BOLA3-AS1	ENSG00000225439	lncRNA_divergent	Targeted lncRNA	10	6.18411	0.37967	1.4794	3.88742	6.45781	Cytoplasmic
35	BX322557.10	BX322557.10	ENSG00000215447	lncRNA_divergent	Targeted lncRNA	5	14.6483	0.474026	15.2532	32.5454	20.5751	Nuclear soluble
36	C11orf95	C11orf95	ENSG00000188070	lncRNA_divergent	Targeted lncRNA	10	18.2441	0.47138	17.8272	32.4771	47.8109	Cytoplasmic
37	PCOTH	C1QTNF9B-AS1	ENSG00000205861	lncRNA_divergent	Targeted lncRNA	5	4.85146	0.534676	0.84895	0.714896	1.36783	Cytoplasmic
38	CATG00000011013.1	CATG00000011013.1	CATG00000011013	lncRNA_antisense	Targeted lncRNA	5	3.97971	0.683977	1.97814	4.2359	1.92926	Nuclear soluble
39	CATG00000016989.1	CATG00000016989.1	CATG00000016989	lncRNA_intergenic	Targeted lncRNA	5	2.85481	0.8364	0.00392444	0.207715	0.253538	Cytoplasmic
40	CATG00000020700.1	CATG00000020700.1	CATG00000020700	lncRNA_intergenic	Targeted lncRNA	5	1.2285	0.712531	0.571271	0.264647	0.0383557	Chromatin bound
41	CATG00000034824.1	CATG00000034824.1	CATG00000034824	lncRNA_antisense	Targeted lncRNA	5	15.8485	0.870997	6.92263	23.6091	30.1591	Cytoplasmic
42	CATG00000035089.1	CATG00000035089.1	CATG00000035089	lncRNA_intergenic	Targeted lncRNA	5	2.48765	0.632117	1.16641	1.90562	3.50101	Cytoplasmic
43	CATG00000073509.1	CATG00000073509.1	CATG00000073509	lncRNA_intergenic	Targeted lncRNA	5	5.1881	0.660494	0.188154	0.19504	0.66164	Cytoplasmic
44	CATG00000076290.1	CATG00000076290.1	CATG00000076290	lncRNA_intergenic	Targeted lncRNA	5	4.30152	0.598798	0.107563	0.413135	0.908727	Cytoplasmic
45	CATG00000079799.1	CATG00000079799.1	CATG00000079799	lncRNA_intergenic	Targeted lncRNA	10	1.86861	0.542328	4.60557	1.3667	0.477992	Chromatin bound
46	CATG00000083589.1	CATG00000083589.1	CATG00000083589	lncRNA_intergenic	Targeted lncRNA	5	10.8455	0.425451	4.06214	7.17349	13.8174	Cytoplasmic
47	CATG00000089639.1	CATG00000089639.1	CATG00000089639	lncRNA_intergenic	Targeted lncRNA	10	2.21372	0.898853	4.32372	3.48876	1.43629	Chromatin bound
48	CATG00000095991.1	CATG00000095991.1	CATG00000095991	lncRNA_divergent	Targeted lncRNA	10	4.59074	0.406739	1.7164	0.189159	0.4907	Chromatin bound
49	CATG00000098665.1	CATG00000098665.1	CATG00000098665	lncRNA_antisense	Targeted lncRNA	10	2.57308	0.461741	0.602953	1.5412	1.50645	Nuclear soluble
50	CATG00000098831.1	CATG00000098831.1	CATG00000098831	lncRNA_antisense	Targeted lncRNA	10	6.55438	0.755619	0.316769	1.88966	0.596007	Nuclear soluble
51	CATG00000106837.1	CATG00000106837.1	CATG00000106837	lncRNA_intergenic	Targeted lncRNA	5	4.19929	0.731244	3.32048	2.73875	1.08783	Chromatin bound
52	CATG00000108369.1	CATG00000108369.1	CATG00000108369	lncRNA_divergent	Targeted lncRNA	10	5.42354	0.375776	5.68435	3.12949	2.42479	Chromatin bound
53	CATGC0000023317	CATGC0000023317	CATGC0000023317	lncRNA_intergenic	Targeted lncRNA	5	1.07076	0.340723	0	0	0	other
54	CATGE0000171943	CATGE0000171943	CATGE0000171943	lncRNA_divergent	Targeted lncRNA	5	0.619701	0.397746	0	0	0	other
55	CD27-AS1	CD27-AS1	ENSG00000215039	lncRNA_divergent	Targeted lncRNA	10	19.5998	0.404531	6.83962	14.5102	9.54624	Nuclear soluble
56	CD99P1	CD99P1	ENSG00000223773	pseudogene	Targeted lncRNA	5	2.3209	0.361528	2.80287	0.865604	1.65158	Chromatin bound
57	CKMT2-AS1	CKMT2-AS1	ENSG00000247572	lncRNA_divergent	Targeted lncRNA	5	13.0984	0.352098	18.9024	9.44079	14.7802	Chromatin bound
58	COX10-AS1	COX10-AS1	ENSG00000236088	lncRNA_divergent	Targeted lncRNA	5	13.2906	0.386364	22.1184	8.67406	7.24194	Chromatin bound
59	MIATNB	CTA-211A9.5	ENSG00000244625	lncRNA_intergenic	Targeted lncRNA	10	6.14952	0.218534	23.3201	9.63636	5.62918	Chromatin bound
60	NUP50-DT	CTA-217C2.1	ENSG00000226328	lncRNA_divergent	Targeted lncRNA	5	11.1088	0.378632	11.5584	4.57106	6.21964	Chromatin bound
61	CTB-31O20.2	CTB-31O20.2	ENSG00000261526	lncRNA_intergenic	Targeted lncRNA	5	4.11975	0.218513	0.557749	2.26122	0.877802	Nuclear soluble
62	CTB-55O6.12	CTB-55O6.12	ENSG00000267169	lncRNA_divergent	Targeted lncRNA	5	7.55796	0.297544	8.89977	5.65873	3.16252	Chromatin bound
63	LINC01184	CTC-228N24.3	ENSG00000245937	lncRNA_divergent	Targeted lncRNA	10	21.9125	0.476431	112.323	12.3361	10.4935	Chromatin bound
64	TMEM220-AS1	CTC-297N7.5	ENSG00000263400	lncRNA_divergent	Targeted lncRNA	5	1.21981	0.334298	2.24029	1.38638	1.15218	Chromatin bound
65	CTC-338M12.4	CTC-338M12.4	ENSG00000233937	lncRNA_divergent	Targeted lncRNA	10	8.53498	0.46732	13.6042	14.3674	0.619283	Nuclear soluble
66	CTC-338M12.5	CTC-338M12.5	ENSG00000250222	lncRNA_intergenic	Targeted lncRNA	10	4.02403	0.321002	1.17327	1.43592	0.906324	Nuclear soluble
67	CTC-459F4.3	CTC-459F4.3	ENSG00000267575	lncRNA_sense_intronic	Targeted lncRNA	5	11.4835	0.409836	8.46104	10.5705	10.4911	Nuclear soluble
68	ZNF56	CTC-559E9.6	ENSG00000267419	lncRNA_divergent	Targeted lncRNA	10	3.76393	0.271845	4.36683	1.52597	0.724415	Chromatin bound
69	ZNF433-AS1	CTD-2006C1.2	ENSG00000219665	lncRNA_intergenic	Targeted lncRNA	10	6.16711	0.284452	9.05262	3.65004	3.96998	Chromatin bound
70	CTD-2015H6.3	CTD-2015H6.3	ENSG00000249042	lncRNA_divergent	Targeted lncRNA	5	10.929	0.400641	3.16198	3.42113	11.1662	Cytoplasmic
71	SCAMP1-AS1	CTD-2037K23.2	ENSG00000245556	lncRNA_divergent	Targeted lncRNA	5	3.34179	0.309326	5.14913	9.64809	2.97191	Nuclear soluble
72	LINC02104	CTD-2078B5.2	ENSG00000271334	lncRNA_intergenic	Targeted lncRNA	5	3.21802	0.635697	0.0889014	0.467476	0.660272	Cytoplasmic
73	ZNF790-AS1	CTD-2162K18.5	ENSG00000267254	lncRNA_sense_intronic	Targeted lncRNA	10	4.19839	0.353867	14.3781	3.73584	2.44834	Chromatin bound
74	WFDC21P	CTD-2319I12.1	ENSG00000261040	lncRNA_intergenic	Targeted lncRNA	5	16.2101	0.523207	0.450551	1.04329	5.32299	Cytoplasmic
75	CTD-2319I12.4	CTD-2319I12.4	ENSG00000267248	lncRNA_intergenic	Targeted lncRNA	10	5.97593	0.34542	5.5096	2.9519	0.958125	Chromatin bound
76	CTD-2336O2.1	CTD-2336O2.1	ENSG00000253982	lncRNA_divergent	Targeted lncRNA	10	23.0745	0.405263	0.432767	3.2558	9.36724	Cytoplasmic
77	CTD-2366F13.1	CTD-2366F13.1	ENSG00000247796	lncRNA_divergent	Targeted lncRNA	5	2.99688	0.506764	0.56186	1.24233	2.86208	Cytoplasmic
78	CTD-2532K18.2	CTD-2532K18.2	ENSG00000251144	lncRNA_sense_intronic	Targeted lncRNA	5	0.395333	0.787781	0.0456584	0.213445	0.242165	Cytoplasmic
79	CTD-2587H24.5	CTD-2587H24.5	ENSG00000267577	lncRNA_divergent	Targeted lncRNA	5	3.65233	0.636624	0.761513	0.932012	1.66576	Cytoplasmic
80	CTD-2651B20.3	CTD-2651B20.3	ENSG00000259520	lncRNA_divergent	Targeted lncRNA	10	0.481566	0.256125	0.200547	0	0.101376	Chromatin bound
81	ZNF528-AS1	CTD-3018O17.3	ENSG00000269834	lncRNA_divergent	Targeted lncRNA	10	3.92463	0.339987	1.3611	0.515694	0.47925	Chromatin bound
82	CTD-3074O7.5	CTD-3074O7.5	ENSG00000255517	lncRNA_divergent	Targeted lncRNA	5	7.38145	0.478261	5.73208	6.56595	1.73276	Nuclear soluble
83	CTD-3131K8.2	CTD-3131K8.2	ENSG00000269439	lncRNA_divergent	Targeted lncRNA	10	8.49121	0.512346	13.6496	10.2307	2.29899	Chromatin bound
84	CTD-3138B18.5	CTD-3138B18.5	ENSG00000268516	lncRNA_divergent	Targeted lncRNA	5	11.5742	0.437828	8.72378	3.23647	4.09863	Chromatin bound
85	MHENCR	CTD-3184A7.4	ENSG00000232442	lncRNA_divergent	Targeted lncRNA	5	7.52361	0.258661	1.9958	5.29876	1.7844	Nuclear soluble
86	DANCR	DANCR	ENSG00000226950	lncRNA_intergenic	Targeted lncRNA	10	16.8199	0.480498	3.07313	16.4335	20.4748	Cytoplasmic
87	DGUOK-AS1	DGUOK-AS1	ENSG00000237883	lncRNA_intergenic	Targeted lncRNA	5	2.3617	0.542035	3.96924	2.07965	0.930032	Chromatin bound
88	DLGAP1-AS1	DLGAP1-AS1	ENSG00000177337	lncRNA_antisense	Targeted lncRNA	5	11.8988	0.293785	9.53678	13.9397	2.70495	Nuclear soluble
89	DNAJC27-AS1	DNAJC27-AS1	ENSG00000224165	lncRNA_divergent	Targeted lncRNA	10	2.77924	0.234293	1.56784	5.33995	1.0205	Nuclear soluble
90	DNM3OS	DNM3OS	ENSG00000230630	lncRNA_antisense	Targeted lncRNA	10	7.06073	0.7021	48.0572	54.3705	8.94229	Nuclear soluble
91	NRAV	DYNLL1-AS1	ENSG00000248008	lncRNA_divergent	Targeted lncRNA	5	8.44179	0.468455	3.37481	6.71775	17.9765	Cytoplasmic
92	EIF3J-DT	EIF3J-AS1	ENSG00000179523	lncRNA_divergent	Targeted lncRNA	5	7.70377	0.384977	3.0783	3.20179	2.2154	Nuclear soluble
93	EMX2OS	EMX2OS	ENSG00000229847	lncRNA_divergent	Targeted lncRNA	10	10.7969	0.538182	15.2648	16.5996	28.6902	Cytoplasmic
94	ERVK13-1	ERVK13-1	ENSG00000260565	lncRNA_intergenic	Targeted lncRNA	10	12.1639	0.259719	18.1658	5.045	0.867832	Chromatin bound
95	ERVK3-1	ERVK3-1	ENSG00000142396	lncRNA_sense_intronic	Targeted lncRNA	10	44.4315	0.414462	12.3133	20.9223	16.8561	Nuclear soluble
96	FBXL19-AS1	FBXL19-AS1	ENSG00000260852	lncRNA_divergent	Targeted lncRNA	10	2.21226	0.397887	3.66185	3.90088	1.95766	Nuclear soluble
97	FGD5-AS1	FGD5-AS1	ENSG00000225733	lncRNA_divergent	Targeted lncRNA	10	77.2828	0.426513	13.7954	74.0107	168.77	Cytoplasmic
98	FLVCR1-DT	FLVCR1-AS1	ENSG00000198468	lncRNA_divergent	Targeted lncRNA	5	2.58711	0.418919	0.434185	0.522322	0.190897	Nuclear soluble
99	FOXN3-AS1	FOXN3-AS1	ENSG00000258920	lncRNA_divergent	Targeted lncRNA	10	3.28691	0.477435	0.290818	1.03961	2.18882	Cytoplasmic
100	FTX	FTX	ENSG00000230590	lncRNA_intergenic	Targeted lncRNA	10	29.951	0.226744	319.945	5.59755	13.3873	Chromatin bound
101	GAS6-DT	GAS6-AS2	ENSG00000272695	lncRNA_divergent	Targeted lncRNA	5	8.19674	0.770801	3.00312	12.7653	18.0019	Cytoplasmic
102	GS1-124K5.4	GS1-124K5.4	ENSG00000237310	lncRNA_intergenic	Targeted lncRNA	10	5.5733	0.371311	1.46989	1.58655	1.55585	Nuclear soluble
103	OTUD6B-AS1	GS1-251I9.4	ENSG00000253738	lncRNA_divergent	Targeted lncRNA	5	24.6109	0.308685	0.910005	7.83718	13.159	Cytoplasmic
104	HCG11	HCG11	ENSG00000228223	lncRNA_intergenic	Targeted lncRNA	10	5.68967	0.455172	2.58325	20.8439	26.294	Cytoplasmic
105	HOXB-AS1	HOXB-AS1	ENSG00000230148	lncRNA_intergenic	Targeted lncRNA	5	1.81518	0.329897	0.240078	0.24911	0.246599	Nuclear soluble
106	HOXD-AS2	HOXD-AS2	ENSG00000237380	lncRNA_divergent	Targeted lncRNA	10	11.7899	0.611511	1.59862	2.45707	6.1197	Cytoplasmic
107	JPX	JPX	ENSG00000225470	lncRNA_intergenic	Targeted lncRNA	10	34.1829	0.34224	58.3673	13.8433	12.9572	Chromatin bound
108	KANSL1-AS1	KANSL1-AS1	ENSG00000214401	lncRNA_divergent	Targeted lncRNA	5	2.47742	0.298462	0.414677	1.15624	1.51821	Cytoplasmic
109	KTN1-AS1	KTN1-AS1	ENSG00000186615	lncRNA_divergent	Targeted lncRNA	5	3.1449	0.447619	3.8969	2.97565	2.82877	Chromatin bound
110	CYTOR	LINC00152	ENSG00000222041	lncRNA_intergenic	Targeted lncRNA	10	191.35	0.519031	569.586	77.9334	110.585	Chromatin bound
111	OLMALINC	LINC00263	ENSG00000235823	lncRNA_intergenic	Targeted lncRNA	10	5.57709	0.241228	1.34165	3.81543	1.6213	Nuclear soluble
112	LINC00339	LINC00339	ENSG00000218510	lncRNA_intergenic	Targeted lncRNA	10	11.1391	0.424731	3.71557	9.54543	5.82763	Nuclear soluble
113	LINC00467	LINC00467	ENSG00000153363	lncRNA_intergenic	Targeted lncRNA	5	23.0299	0.380417	1.97832	3.26412	7.74862	Cytoplasmic
114	SMIM26	LINC00493	ENSG00000232388	lncRNA_intergenic	Targeted lncRNA	10	40.0212	0.428571	1.17838	13.0495	23.5989	Cytoplasmic
115	LINC00511	LINC00511	ENSG00000227036	lncRNA_intergenic	Targeted lncRNA	10	2.90143	0.191126	3.50674	2.25316	3.17751	Chromatin bound
116	LINC00517	LINC00517	ENSG00000259091	lncRNA_antisense	Targeted lncRNA	10	6.50503	0.912921	0.726589	2.01386	2.85932	Cytoplasmic
117	LINC00630	LINC00630	ENSG00000223546	lncRNA_sense_intronic	Targeted lncRNA	5	17.944	0.329295	24.8852	11.994	11.258	Chromatin bound
118	LINC00654	LINC00654	ENSG00000205181	lncRNA_intergenic	Targeted lncRNA	10	8.38434	0.462821	6.77348	14.103	20.9029	Cytoplasmic
119	NORAD	LINC00657	ENSG00000260032	lncRNA_intergenic	Targeted lncRNA	10	57.5608	0.376238	37.6937	132.923	133.407	Cytoplasmic
120	LINC00662	LINC00662	ENSG00000261824	lncRNA_intergenic	Targeted lncRNA	5	10.1096	0.443255	54.0012	8.15182	13.1446	Chromatin bound
121	LINC00667	LINC00667	ENSG00000263753	lncRNA_intergenic	Targeted lncRNA	10	31.264	0.427907	20.5897	13.1718	30.8589	Cytoplasmic
122	LINC00674	LINC00674	ENSG00000237854	pseudogene	Targeted lncRNA	10	25.568	0.421535	27.9984	37.2432	29.3418	Nuclear soluble
123	LINC00702	LINC00702	ENSG00000233117	lncRNA_intergenic	Targeted lncRNA	10	1.0045	0.647332	1.55901	2.08649	1.60391	Nuclear soluble
124	LINC00707	LINC00707	ENSG00000238266	lncRNA_intergenic	Targeted lncRNA	10	0.752494	0.368476	0.269518	0.213416	0.601234	Cytoplasmic
125	LINC00847	LINC00847	ENSG00000245060	lncRNA_divergent	Targeted lncRNA	5	6.64347	0.244755	1.97211	2.86558	5.95443	Cytoplasmic
126	LINC00856	LINC00856	ENSG00000230417	lncRNA_intergenic	Targeted lncRNA	5	1.82931	0.731001	1.97763	1.00682	2.09445	Cytoplasmic
127	LINC00862	LINC00862	ENSG00000203721	lncRNA_intergenic	Targeted lncRNA	5	0.934711	0.650823	11.6497	2.96574	2.42207	Chromatin bound
128	DUBR	LINC00883	ENSG00000243701	lncRNA_intergenic	Targeted lncRNA	10	9.37244	0.406528	6.46741	3.95442	9.0022	Cytoplasmic
129	LINC00886	LINC00886	ENSG00000240875	lncRNA_intergenic	Targeted lncRNA	5	4.3848	0.375962	15.1156	6.60304	6.31045	Chromatin bound
130	LINC00899	LINC00899	ENSG00000231711	lncRNA_divergent	Targeted lncRNA	5	4.51827	0.454158	2.94373	5.76856	2.65189	Nuclear soluble
131	LINC00909	LINC00909	ENSG00000264247	lncRNA_divergent	Targeted lncRNA	5	7.30292	0.351001	8.77783	18.6205	4.38271	Nuclear soluble
132	LINC00938	LINC00938	ENSG00000273015	lncRNA_intergenic	Targeted lncRNA	10	9.83669	0.267995	6.81458	8.44651	3.16312	Nuclear soluble
133	LINC00941	LINC00941	ENSG00000235884	lncRNA_intergenic	Targeted lncRNA	5	9.03027	0.673077	2.03474	3.50992	6.27339	Cytoplasmic
134	C10orf143	LINC00959	ENSG00000237489	lncRNA_intergenic	Targeted lncRNA	10	5.24602	0.357713	3.64369	1.61049	1.53693	Chromatin bound
135	LINC00963	LINC00963	ENSG00000204054	lncRNA_intergenic	Targeted lncRNA	5	23.4356	0.321145	10.0688	15.4519	25.4178	Cytoplasmic
136	LINC00968	LINC00968	ENSG00000246430	lncRNA_divergent	Targeted lncRNA	10	5.28688	0.862369	1.07798	2.03297	4.77521	Cytoplasmic
137	LINC01023	LINC01023	ENSG00000272523	lncRNA_intergenic	Targeted lncRNA	5	3.75396	0.43553	0.156392	0.834364	0.62213	Nuclear soluble
138	LINC01085	LINC01085	ENSG00000248698	lncRNA_intergenic	Targeted lncRNA	5	8.36366	0.769231	3.10516	3.24125	5.07326	Cytoplasmic
139	PPM1F-AS1	LL22NC03-86G7.1	ENSG00000224086	lncRNA_divergent	Targeted lncRNA	5	3.68236	0.361111	0.925325	1.69918	2.44771	Cytoplasmic
140	LOXL1-AS1	LOXL1-AS1	ENSG00000261801	lncRNA_divergent	Targeted lncRNA	5	25.1426	0.669216	9.64375	12.6194	21.1347	Cytoplasmic
141	MAGI2-AS3	MAGI2-AS3	ENSG00000234456	lncRNA_divergent	Targeted lncRNA	5	85.7905	0.586255	78.0073	58.2241	38.1195	Chromatin bound
142	MAPKAPK5-AS1	MAPKAPK5-AS1	ENSG00000234608	lncRNA_divergent	Targeted lncRNA	10	10.2366	0.365651	0	3.18002	5.85139	Cytoplasmic
143	MEG3	MEG3	ENSG00000214548	lncRNA_intergenic	Targeted lncRNA	10	117.654	0.347826	353.686	92.8603	20.5081	Chromatin bound
144	MELTF-AS1	MFI2-AS1	ENSG00000228109	lncRNA_divergent	Targeted lncRNA	5	2.44673	0.38471	1.08241	1.37776	0.804586	Nuclear soluble
145	MIPEPP3	MIPEPP3	ENSG00000233325	pseudogene	Targeted lncRNA	5	4.61288	0.340237	3.72029	2.01215	4.66809	Cytoplasmic
146	MKLN1-AS	MKLN1-AS2	ENSG00000236753	lncRNA_divergent	Targeted lncRNA	10	2.42604	0.422049	0.838994	1.23918	2.75584	Cytoplasmic
147	MRPS31P5	MRPS31P5	ENSG00000243406	pseudogene	Targeted lncRNA	5	5.47817	0.273328	3.60008	4.00582	3.51149	Nuclear soluble
148	NBR2	NBR2	ENSG00000198496	pseudogene	Targeted lncRNA	5	6.81945	0.40107	13.8347	6.24181	2.84019	Chromatin bound
149	NNT-AS1	NNT-AS1	ENSG00000248092	lncRNA_divergent	Targeted lncRNA	10	8.71719	0.324569	7.33355	8.69487	14.9327	Cytoplasmic
150	NOP14-AS1	NOP14-AS1	ENSG00000249673	lncRNA_divergent	Targeted lncRNA	5	4.66837	0.382022	8.14708	10.3322	12.5176	Cytoplasmic
151	NR2F1-AS1	NR2F1-AS1	ENSG00000237187	lncRNA_divergent	Targeted lncRNA	10	28.2989	0.461326	49.3134	11.3705	24.0286	Chromatin bound
152	OIP5-AS1	OIP5-AS1	ENSG00000247556	lncRNA_sense_intronic	Targeted lncRNA	5	68.4112	0.261745	5.52537	21.0624	11.8075	Nuclear soluble
153	OSER1-DT	OSER1-AS1	ENSG00000223891	lncRNA_divergent	Targeted lncRNA	5	3.82392	0.197183	2.8197	6.95504	4.84451	Nuclear soluble
154	PCAT6	PCAT6	ENSG00000228288	lncRNA_intergenic	Targeted lncRNA	10	2.58613	0.4651	0.399163	0.64476	0.577585	Nuclear soluble
155	PITPNA-AS1	PITPNA-AS1	ENSG00000236618	lncRNA_divergent	Targeted lncRNA	10	20.8849	0.44921	0.34013	1.9611	7.00165	Cytoplasmic
156	PRRT3-AS1	PRRT3-AS1	ENSG00000230082	lncRNA_divergent	Targeted lncRNA	10	3.02404	0.604758	3.65032	2.2241	1.2369	Chromatin bound
157	PSMG3-AS1	PSMG3-AS1	ENSG00000230487	lncRNA_divergent	Targeted lncRNA	5	7.01935	0.416209	4.01645	11.5362	5.90538	Nuclear soluble
158	PTCHD3P1	PTCHD3P1	ENSG00000224597	lncRNA_intergenic	Targeted lncRNA	10	79.3768	0.481697	89.3067	39.2665	92.5052	Cytoplasmic
159	PTPRG-AS1	PTPRG-AS1	ENSG00000241472	lncRNA_divergent	Targeted lncRNA	5	2.5334	0.382423	1.36903	0.691086	1.54224	Cytoplasmic
160	PXN-AS1	PXN-AS1	ENSG00000255857	lncRNA_divergent	Targeted lncRNA	5	6.01259	0.378049	1.35005	2.75948	1.79012	Nuclear soluble
161	RAB30-DT	RAB30-AS1	ENSG00000246067	lncRNA_divergent	Targeted lncRNA	10	32.4487	0.336364	5.56518	26.007	4.06879	Nuclear soluble
162	RAD51-AS1	RAD51-AS1	ENSG00000245849	lncRNA_divergent	Targeted lncRNA	10	3.72781	0.224691	20.3753	16.7226	1.44309	Chromatin bound
163	RASSF8-AS1	RASSF8-AS1	ENSG00000246695	lncRNA_divergent	Targeted lncRNA	5	9.49213	0.537252	7.7068	11.1516	7.10122	Nuclear soluble
164	RP1-152L7.5	RP1-152L7.5	ENSG00000216775	pseudogene	Targeted lncRNA	5	7.6695	0.597987	7.67677	13.1401	12.9763	Nuclear soluble
165	ERICH6-AS1	RP11-103G8.2	ENSG00000240137	lncRNA_divergent	Targeted lncRNA	5	2.5821	0.321962	1.56129	1.67674	1.0261	Nuclear soluble
166	RP11-10K16.1	RP11-10K16.1	ENSG00000245213	lncRNA_divergent	Targeted lncRNA	10	1.69229	0.296	3.57645	2.62959	0.812179	Chromatin bound
167	RP11-110G21.1	RP11-110G21.1	ENSG00000228801	lncRNA_divergent	Targeted lncRNA	5	3.17739	0.374081	3.84075	5.4578	3.75021	Nuclear soluble
168	CCDC84-DT	RP11-110I1.12	ENSG00000255121	lncRNA_divergent	Targeted lncRNA	5	7.4595	0.48228	4.27484	5.78235	6.8109	Cytoplasmic
169	RP11-111M22.3	RP11-111M22.3	ENSG00000255135	lncRNA_divergent	Targeted lncRNA	5	7.1644	0.349371	2.44953	8.10613	2.75606	Nuclear soluble
170	RP11-115C21.2	RP11-115C21.2	ENSG00000246089	lncRNA_divergent	Targeted lncRNA	10	3.63598	0.447291	0.864794	1.80315	1.14022	Nuclear soluble
171	PPP3CB-AS1	RP11-137L10.6	ENSG00000221817	lncRNA_divergent	Targeted lncRNA	10	3.43304	0.349731	6.10557	5.55071	3.9233	Chromatin bound
172	RP11-1398P2.1	RP11-1398P2.1	ENSG00000244459	lncRNA_intergenic	Targeted lncRNA	5	1.27693	0.442105	0.0733834	0.218271	0.09604	Nuclear soluble
173	PIGBOS1	RP11-139H15.1	ENSG00000225973	lncRNA_divergent	Targeted lncRNA	10	17.001	0.413437	0.877747	3.41752	6.28646	Cytoplasmic
174	RP11-149I23.3	RP11-149I23.3	ENSG00000232110	lncRNA_antisense	Targeted lncRNA	10	1.57838	0.333601	0.418957	0.671813	0.29503	Nuclear soluble
175	LINC01605	RP11-150O12.1	ENSG00000253161	lncRNA_intergenic	Targeted lncRNA	15	7.31644	0.644464	3.00325	3.59578	10.6245	Cytoplasmic
176	RP11-160O5.1	RP11-160O5.1	ENSG00000263470	lncRNA_divergent	Targeted lncRNA	5	4.57716	0.428363	0.141075	0.553891	1.76577	Cytoplasmic
177	LMO7-AS1	RP11-173B14.5	ENSG00000261105	lncRNA_divergent	Targeted lncRNA	10	37.5228	0.824095	15.5442	7.79152	9.18191	Chromatin bound
178	RP11-195F19.9	RP11-195F19.9	ENSG00000230074	lncRNA_divergent	Targeted lncRNA	5	6.3082	0.42299	2.61497	3.13187	5.86299	Cytoplasmic
179	RP11-206L10.2	RP11-206L10.2	ENSG00000228327	lncRNA_intergenic	Targeted lncRNA	5	13.4096	0.29976	5.0158	1.70207	0.73258	Chromatin bound
180	NINJ2-AS1	RP11-218M22.1	ENSG00000177406	lncRNA_divergent	Targeted lncRNA	5	2.13087	0.254945	2.31454	4.07018	3.39645	Nuclear soluble
181	RP11-220I1.1	RP11-220I1.1	ENSG00000233137	lncRNA_intergenic	Targeted lncRNA	5	27.9433	0.356261	20.821	34.1552	50.8626	Cytoplasmic
182	LINC02454	RP11-221N13.3	ENSG00000256268	lncRNA_intergenic	Targeted lncRNA	10	9.88979	0.758075	5.02016	6.19571	3.97046	Nuclear soluble
183	ATP2A1-AS1	RP11-22P6.3	ENSG00000260442	lncRNA_divergent	Targeted lncRNA	10	5.69582	0.558952	0.463578	1.45626	1.83479	Cytoplasmic
184	RP11-242D8.1	RP11-242D8.1	ENSG00000267002	lncRNA_divergent	Targeted lncRNA	5	4.51164	0.266566	6.38108	3.46552	1.78486	Chromatin bound
185	LINC01204	RP11-245M24.1	ENSG00000229563	lncRNA_intergenic	Targeted lncRNA	5	2.61265	0.795886	3.20921	1.13011	2.27109	Chromatin bound
186	RP11-253M7.1	RP11-253M7.1	ENSG00000259426	lncRNA_divergent	Targeted lncRNA	10	6.63267	0.665676	42.9327	16.756	10.0253	Chromatin bound
187	RP11-25K19.1	RP11-25K19.1	ENSG00000167912	lncRNA_divergent	Targeted lncRNA	5	5.79213	0.498889	0.949554	3.11545	6.94674	Cytoplasmic
188	RP11-295G20.2	RP11-295G20.2	ENSG00000233461	lncRNA_divergent	Targeted lncRNA	10	8.31217	0.414317	0.82225	1.03545	3.55424	Cytoplasmic
189	PRDX6-AS1	RP11-296O14.3	ENSG00000203739	lncRNA_divergent	Targeted lncRNA	10	11.8316	0.303468	79.2376	6.28607	4.40095	Chromatin bound
190	TBX2-AS1	RP11-332H18.4	ENSG00000267280	lncRNA_divergent	Targeted lncRNA	5	12.0588	0.589232	3.95996	1.93059	2.19892	Chromatin bound
191	RP11-333E1.1	RP11-333E1.1	ENSG00000261879	lncRNA_divergent	Targeted lncRNA	10	4.80226	0.234013	5.38494	1.74472	1.19973	Chromatin bound
192	RP11-33B1.1	RP11-33B1.1	ENSG00000245958	pseudogene	Targeted lncRNA	10	21.6398	0.259	30.2553	9.18615	5.48292	Chromatin bound
193	RP11-345P4.9	RP11-345P4.9	ENSG00000272106	lncRNA_divergent	Targeted lncRNA	5	3.10488	0.263001	1.93437	8.83626	4.84386	Nuclear soluble
194	LINC02762	RP11-356J5.12	ENSG00000250303	lncRNA_intergenic	Targeted lncRNA	5	13.6116	0.44503	5.49636	2.54921	6.33662	Cytoplasmic
195	LINC01278	RP11-357C3.3	ENSG00000235437	lncRNA_intergenic	Targeted lncRNA	5	20.0906	0.351536	30.7229	3.14577	6.44435	Chromatin bound
196	RP11-379H18.1	RP11-379H18.1	ENSG00000271122	lncRNA_divergent	Targeted lncRNA	5	7.80815	0.386401	1.72192	9.75407	13.2334	Cytoplasmic
197	RP11-37B2.1	RP11-37B2.1	ENSG00000251136	lncRNA_divergent	Targeted lncRNA	5	6.79513	0.277585	60.5709	6.87721	5.392	Chromatin bound
198	RP11-38L15.3	RP11-38L15.3	ENSG00000231187	lncRNA_antisense	Targeted lncRNA	5	2.21915	0.148307	1.70603	1.24824	1.03161	Chromatin bound
199	RP11-390P2.4	RP11-390P2.4	ENSG00000225177	lncRNA_divergent	Targeted lncRNA	5	4.16802	0.55905	1.49616	2.1447	1.35692	Nuclear soluble
200	MUC12-AS1	RP11-395B7.4	ENSG00000227053	lncRNA_divergent	Targeted lncRNA	5	15.8206	0.638655	1.66211	1.9816	2.86448	Cytoplasmic
201	RP11-398K22.12	RP11-398K22.12	ENSG00000229852	lncRNA_divergent	Targeted lncRNA	10	6.37368	0.28619	9.86822	2.80418	4.04209	Chromatin bound
202	LINC01615	RP11-417E7.1	ENSG00000223485	lncRNA_intergenic	Targeted lncRNA	10	18.4509	0.766598	1.64882	4.65071	10.0961	Cytoplasmic
203	LINC01137	RP11-422J8.1	ENSG00000233621	lncRNA_divergent	Targeted lncRNA	5	3.23877	0.357724	1.29676	0.405373	1.53542	Cytoplasmic
204	RP11-428J1.5	RP11-428J1.5	ENSG00000272142	lncRNA_divergent	Targeted lncRNA	5	4.44467	0.603037	2.04975	3.31838	7.03201	Cytoplasmic
205	RP11-432J22.2	RP11-432J22.2	ENSG00000238058	lncRNA_divergent	Targeted lncRNA	5	5.31923	0.384146	8.74674	8.39894	2.57038	Chromatin bound
206	LINC01719	RP11-458D21.1	ENSG00000233396	lncRNA_intergenic	Targeted lncRNA	5	1.24738	0.395133	1.20692	0.799876	0.408741	Chromatin bound
207	FOXC2-AS1	RP11-463O9.5	ENSG00000260944	lncRNA_divergent	Targeted lncRNA	5	0.897068	0.693966	0.164182	0.106794	0.280014	Cytoplasmic
208	ZNF213-AS1	RP11-473M20.14	ENSG00000263072	lncRNA_divergent	Targeted lncRNA	5	8.30694	0.301329	9.23746	16.5354	6.28829	Nuclear soluble
209	RP11-474B16.1	RP11-474B16.1	ENSG00000257642	lncRNA_divergent	Targeted lncRNA	10	8.64328	0.831987	14.6469	7.49711	2.52242	Chromatin bound
210	RP11-474P2.4	RP11-474P2.4	ENSG00000257496	lncRNA_intergenic	Targeted lncRNA	5	2.52276	0.789694	35.1063	13.5917	15.2106	Chromatin bound
211	LINC01133	RP11-48O20.4	ENSG00000224259	lncRNA_intergenic	Targeted lncRNA	5	1.00495	0.704846	1.36892	0.518147	1.86497	Cytoplasmic
212	RP11-499E18.1	RP11-499E18.1	ENSG00000248161	lncRNA_sense_intronic	Targeted lncRNA	5	2.63153	0.41344	1.08881	1.31721	1.25668	Nuclear soluble
213	RP11-500C11.3	RP11-500C11.3	ENSG00000272269	lncRNA_divergent	Targeted lncRNA	10	3.08472	0.417941	0.380748	1.87471	2.77395	Cytoplasmic
214	RP11-517P14.2	RP11-517P14.2	ENSG00000230555	lncRNA_intergenic	Targeted lncRNA	5	2.17597	0.404339	0.184696	1.10649	1.44136	Cytoplasmic
215	RP11-527D7.1	RP11-527D7.1	ENSG00000225554	lncRNA_intergenic	Targeted lncRNA	10	5.05469	0.844009	2.16179	2.43146	1.89506	Nuclear soluble
216	LINC02482	RP11-539L10.3	ENSG00000251580	lncRNA_divergent	Targeted lncRNA	10	2.91956	0.386301	1.50443	1.52897	1.11465	Nuclear soluble
217	LINC02709	RP11-540A21.2	ENSG00000245522	lncRNA_intergenic	Targeted lncRNA	5	4.01382	0.617978	2.4233	4.22508	3.60468	Nuclear soluble
218	RP11-545E17.3	RP11-545E17.3	ENSG00000223478	lncRNA_divergent	Targeted lncRNA	10	7.39439	0.416956	0.791298	1.51339	3.01855	Cytoplasmic
219	LNCOG	RP11-54A9.1	ENSG00000257219	lncRNA_intergenic	Targeted lncRNA	10	8.68344	0.60479	1.08832	1.40672	2.27696	Cytoplasmic
220	RP11-550I24.2	RP11-550I24.2	ENSG00000243176	lncRNA_antisense	Targeted lncRNA	5	4.84218	0.255002	2.30858	0.947165	0.581998	Chromatin bound
221	RP11-553K8.5	RP11-553K8.5	ENSG00000261573	lncRNA_antisense	Targeted lncRNA	10	1.56054	0.973796	0.179706	0.763425	0.63258	Nuclear soluble
222	PIK3CD-AS2	RP11-558F24.4	ENSG00000231789	lncRNA_divergent	Targeted lncRNA	5	5.41221	0.626079	0.16751	1.11052	3.40773	Cytoplasmic
223	ADAMTS7P4	RP11-561C5.5	ENSG00000218052	pseudogene	Targeted lncRNA	5	6.51526	0.566802	1.05699	1.17369	2.3315	Cytoplasmic
224	PRANCR	RP11-611E13.2	ENSG00000257815	lncRNA_divergent	Targeted lncRNA	10	2.71023	0.236364	0.125755	0.592725	0.688506	Cytoplasmic
225	GIHCG	RP11-620J15.3	ENSG00000257698	lncRNA_divergent	Targeted lncRNA	5	23.7568	0.361702	0.973441	5.11328	7.25147	Cytoplasmic
226	NBDY	RP11-622K12.1	ENSG00000204272	lncRNA_intergenic	Targeted lncRNA	5	38.9657	0.513986	2.30291	4.95406	16.3821	Cytoplasmic
227	RP11-656D10.3	RP11-656D10.3	ENSG00000238287	lncRNA_divergent	Targeted lncRNA	5	2.71926	0.409739	6.99574	2.85293	0.564208	Chromatin bound
228	LINC01503	RP11-65J3.1	ENSG00000233901	lncRNA_intergenic	Targeted lncRNA	5	3.00286	0.514905	0.887363	0.758598	2.15333	Cytoplasmic
229	RP11-660L16.2	RP11-660L16.2	ENSG00000254682	lncRNA_divergent	Targeted lncRNA	10	10.62	0.292748	2.91465	6.89302	2.14683	Nuclear soluble
230	GACAT2	RP11-674N23.1	ENSG00000265962	lncRNA_divergent	Targeted lncRNA	5	0.605675	0.579946	0.111505	0.384779	0.949119	Cytoplasmic
231	CASP4LP	RP11-693N9.2	ENSG00000235505	pseudogene	Targeted lncRNA	10	1.84796	0.176578	0.192121	0	0.478612	Cytoplasmic
232	RP11-6N17.4	RP11-6N17.4	ENSG00000264920	lncRNA_divergent	Targeted lncRNA	10	3.63207	0.37983	0.992542	0.905723	1.59926	Cytoplasmic
233	RP11-727A23.5	RP11-727A23.5	ENSG00000247137	lncRNA_divergent	Targeted lncRNA	5	4.92871	0.305211	7.26157	2.32748	0.799373	Chromatin bound
234	TMC3-AS1	RP11-761I4.3	ENSG00000259343	lncRNA_divergent	Targeted lncRNA	5	3.27696	0.429795	5.32704	5.85704	17.2151	Cytoplasmic
235	FRG1JP	RP11-764K9.4	ENSG00000215548	pseudogene	Targeted lncRNA	5	5.06071	0.306839	2.06397	2.57602	3.49974	Cytoplasmic
236	PPP1R14B-AS1	RP11-783K16.5	ENSG00000256940	lncRNA_divergent	Targeted lncRNA	5	26.7634	0.548552	0.693075	3.60353	9.73267	Cytoplasmic
237	LINC02381	RP11-834C11.4	ENSG00000250742	lncRNA_intergenic	Targeted lncRNA	10	14.1889	0.594415	0.0998882	2.27201	13.5625	Cytoplasmic
238	SRP54-AS1	RP11-85K15.2	ENSG00000258704	lncRNA_divergent	Targeted lncRNA	10	7.96712	0.265681	13.1923	6.92021	2.89588	Chromatin bound
239	RP11-863P13.3	RP11-863P13.3	ENSG00000261327	lncRNA_intergenic	Targeted lncRNA	10	2.16315	0.792706	1.42752	2.99772	1.90928	Nuclear soluble
240	RP11-879F14.2	RP11-879F14.2	ENSG00000267279	lncRNA_sense_intronic	Targeted lncRNA	5	12.0625	0.590542	3.78697	3.57328	1.29404	Chromatin bound
241	LINC01569	RP11-95P2.1	ENSG00000262468	lncRNA_intergenic	Targeted lncRNA	10	1.55919	0.330544	0.754949	0.954455	0.689069	Nuclear soluble
242	RP11-977G19.11	RP11-977G19.11	ENSG00000257303	lncRNA_divergent	Targeted lncRNA	5	4.99067	0.380544	2.9498	2.29316	0.776871	Chromatin bound
243	RP13-20L14.6	RP13-20L14.6	ENSG00000265458	lncRNA_divergent	Targeted lncRNA	10	1.41127	0.247779	0.19872	0.781042	1.14879	Cytoplasmic
244	LASTR	RP13-463N16.6	ENSG00000242147	lncRNA_intergenic	Targeted lncRNA	5	4.54859	0.635018	0.154899	1.30839	2.30612	Cytoplasmic
245	MINCR	RP13-582O9.5	ENSG00000253716	lncRNA_divergent	Targeted lncRNA	5	6.16459	0.421769	0.956812	2.58127	2.24852	Nuclear soluble
246	TPTEP2	RP3-449O17.1	ENSG00000244627	pseudogene	Targeted lncRNA	5	20.0429	0.260383	13.4082	3.18427	1.47284	Chromatin bound
247	MIR34AHG	RP3-510D11.1	ENSG00000228526	lncRNA_intergenic	Targeted lncRNA	10	2.82155	0.620183	5.56484	0.5235	1.52174	Chromatin bound
248	LNCTAM34A	RP3-510D11.2	ENSG00000234546	lncRNA_divergent	Targeted lncRNA	10	3.50472	0.581901	2.55994	2.44868	2.48785	Chromatin bound
249	LINC01357	RP3-522D1.1	ENSG00000224167	lncRNA_intergenic	Targeted lncRNA	5	0.880071	0.427975	0.474281	0.293534	0.443112	Chromatin bound
250	ZNF337-AS1	RP4-694B14.5	ENSG00000213742	lncRNA_divergent	Targeted lncRNA	5	3.17521	0.38014	6.7847	6.49411	2.04708	Chromatin bound
251	INKA2-AS1	RP4-773A18.4	ENSG00000227811	lncRNA_divergent	Targeted lncRNA	10	2.43353	0.372428	1.36601	2.70251	3.67591	Cytoplasmic
252	RP4-794H19.4	RP4-794H19.4	ENSG00000230812	lncRNA_intergenic	Targeted lncRNA	5	1.07008	0.526	1.99665	1.06558	0.881606	Chromatin bound
253	RP5-1050D4.5	RP5-1050D4.5	ENSG00000262227	lncRNA_divergent	Targeted lncRNA	5	8.70462	0.464151	5.0654	7.60752	5.65423	Nuclear soluble
254	NRSN2-AS1	RP5-1103G7.4	ENSG00000225377	lncRNA_divergent	Targeted lncRNA	10	9.86411	0.467913	11.2826	8.38594	9.52196	Chromatin bound
255	ELOA-AS1	RP5-886K2.3	ENSG00000236810	lncRNA_divergent	Targeted lncRNA	10	3.06515	0.331662	2.7467	1.39857	1.35328	Chromatin bound
256	PRR34-AS1	RP6-109B7.3	ENSG00000241990	lncRNA_divergent	Targeted lncRNA	5	33.57	0.429224	9.09314	2.67292	2.96627	Chromatin bound
257	MIR222HG	RP6-99M1.2	ENSG00000270069	lncRNA_intergenic	Targeted lncRNA	10	97.041	0.510725	1001.82	206.679	36.83	Chromatin bound
258	APTR	RSBN1L-AS1	ENSG00000214293	lncRNA_divergent	Targeted lncRNA	5	5.45204	0.398281	9.18702	4.626	3.37323	Chromatin bound
259	SBF2-AS1	SBF2-AS1	ENSG00000246273	lncRNA_antisense	Targeted lncRNA	10	29.0789	0.570585	23.9401	32.0556	44.1953	Cytoplasmic
260	SERTAD4-AS1	SERTAD4-AS1	ENSG00000203706	lncRNA_intergenic	Targeted lncRNA	10	30.3797	0.57931	0.689122	3.36805	8.19575	Cytoplasmic
261	SMURF2P1	SMURF2P1	ENSG00000248121	pseudogene	Targeted lncRNA	5	15.6668	0.463816	0	6.49366	6.2128	Nuclear soluble
262	SNAI3-AS1	SNAI3-AS1	ENSG00000260630	lncRNA_divergent	Targeted lncRNA	5	10.5717	0.407291	5.71615	5.92639	7.83063	Cytoplasmic
263	SNHG18	SNHG18	ENSG00000250786	lncRNA_divergent	Targeted lncRNA	10	60.9871	0.692053	21.6811	37.025	17.7964	Nuclear soluble
264	SOCS2-AS1	SOCS2-AS1	ENSG00000246985	lncRNA_divergent	Targeted lncRNA	10	8.86661	0.60642	9.10472	3.18684	2.42226	Chromatin bound
265	SRP14-AS1	SRP14-AS1	ENSG00000248508	lncRNA_divergent	Targeted lncRNA	5	3.65478	0.322775	3.95253	2.62538	1.87675	Chromatin bound
266	ST7-AS1	ST7-AS1	ENSG00000227199	lncRNA_divergent	Targeted lncRNA	5	4.06224	0.418883	1.10976	3.88525	2.26323	Nuclear soluble
267	STX18-AS1	STX18-AS1	ENSG00000247708	lncRNA_divergent	Targeted lncRNA	5	4.62855	0.233244	23.9796	5.26715	3.32021	Chromatin bound
268	SUGT1P1	SUGT1P	ENSG00000226823	pseudogene	Targeted lncRNA	5	1.26835	0.435897	1.28096	1.12664	0.42253	Chromatin bound
269	TERC	TERC	ENSG00000270141	lncRNA_intergenic	Targeted lncRNA	10	82.0131	0.375	24.6906	148.13	20.0932	Nuclear soluble
270	TMCC1-AS1	TMCC1-AS1	ENSG00000271270	lncRNA_divergent	Targeted lncRNA	10	1.91922	0.512761	2.92921	0.969698	1.3109	Chromatin bound
271	TMEM44-AS1	TMEM44-AS1	ENSG00000231770	lncRNA_divergent	Targeted lncRNA	5	5.48568	0.264099	5.90688	8.36717	2.97276	Nuclear soluble
272	TMEM9B-AS1	TMEM9B-AS1	ENSG00000254860	lncRNA_divergent	Targeted lncRNA	5	4.09432	0.347769	6.2161	3.86356	0.807954	Chromatin bound
273	TP53TG1	TP53TG1	ENSG00000182165	lncRNA_divergent	Targeted lncRNA	10	28.5964	0.434109	0.265803	2.46704	7.82846	Cytoplasmic
274	TRAM2-AS1	TRAM2-AS1	ENSG00000225791	lncRNA_divergent	Targeted lncRNA	10	8.2447	0.524776	1.93299	6.16282	9.92296	Cytoplasmic
275	TTN-AS1	TTN-AS1	ENSG00000237298	lncRNA_antisense	Targeted lncRNA	5	6.36476	0.280654	63.4083	8.61522	10.4124	Chromatin bound
276	TUG1	TUG1	ENSG00000253352	lncRNA_divergent	Targeted lncRNA	10	20.8262	0.416761	68.419	158.495	124.16	Nuclear soluble
277	U52111.14	U52111.14	ENSG00000232725	lncRNA_divergent	Targeted lncRNA	10	13.6592	0.632302	5.18094	3.42306	10.5096	Cytoplasmic
278	UBL7-AS1	UBL7-AS1	ENSG00000247240	lncRNA_divergent	Targeted lncRNA	10	5.71707	0.351178	1.40593	1.32224	2.09026	Cytoplasmic
279	USP46-DT	USP46-AS1	ENSG00000248866	lncRNA_divergent	Targeted lncRNA	5	6.02561	0.486607	8.8106	11.3379	9.04895	Nuclear soluble
280	WDFY3-AS2	WDFY3-AS2	ENSG00000180769	lncRNA_divergent	Targeted lncRNA	10	5.34219	0.363848	0.743575	0.751884	2.04907	Cytoplasmic
281	ZBED5-AS1	ZBED5-AS1	ENSG00000247271	lncRNA_divergent	Targeted lncRNA	5	9.05644	0.361169	3.59109	4.87282	4.28037	Nuclear soluble
282	ZNF37BP	ZNF37BP	ENSG00000234420	pseudogene	Targeted lncRNA	10	9.85543	0.239052	21.5229	12.9741	11.6724	Chromatin bound
283	ZNF667-AS1	ZNF667-AS1	ENSG00000166770	lncRNA_divergent	Targeted lncRNA	5	18.1819	0.365217	1.20418	1.64985	3.44305	Cytoplasmic
284	ZNF674-AS1	ZNF674-AS1	ENSG00000230844	lncRNA_divergent	Targeted lncRNA	10	5.64903	0.389562	3.22784	11.9743	2.97332	Nuclear soluble
285	ZSCAN16-AS1	ZSCAN16-AS1	ENSG00000269293	lncRNA_intergenic	Targeted lncRNA	10	9.46102	0.330952	18.115	7.75729	3.87118	Chromatin bound
