# Supplementary material for: Functional annotation of human long noncoding RNAs via molecular phenotyping
Source: Genome Res. 2020 Jul;30(7):1060–72. doi: 10.1101/gr.254219.119 (PMC7397864; doi:10.1101/gr.254219.119)
Supplement: Supplemental Material [file supp_gr.254219.119_Supplemental_Table_S2_.xlsx]

## Sheet: Info
	Supplemental Table S2: ASO design, knockdown efficiencies and qpcr primer sequences.
	Table S2A. Design and length of ASOs.			Table S2B. ASOs knockdown efficiencies.			Table S2C. RT-qpcr primer pairs sequences.
	ID	Description		ID	Description		ID	Description
1	KD.pubID	HGNC symbol or KD.geneSymbol otherwise	1	KD.pubID	HGNC symbol or KD.geneSymbol otherwise	1	KD.pubID	HGNC symbol or KD.geneSymbol otherwise
2	KD.geneSymbol	gene symbol of the knockdown target	2	KD.geneSymbol	gene symbol of the targeted lncRNA	2	KD.geneSymbol	gene symbol of the targeted lncRNA
3	perturb_id	ASO id	3	perturb_id	ASO id	3	primer1F (5'-3')	forward primer sequence pair_1
4	Description	classification of knockdown targets: lncRNA, positive controls etc.	4	KD_eff.Inc	maximum knockdown efficiency across 3 primer pairs (Incucyte data)	4	primer1R (5'-3')	reverse primer sequence pair_1
5	ASO_source	source of ASO (Exiqon/GeneDesign)	5	Inc_flag	0/1 - fail success experimental flag	5	primer2F (5'-3')	forward primer sequence pair_2
6	ASO_seq	ASO sequence	6	KD_eff.CAGE	maximum knockdown efficiency across 3 primer pairs (CAGE selection)	6	primer2R (5'-3')	reverse primer sequence pair_2
7	ASO_length	ASO length	7	ASO_hit	targeted genomic region (exon/intron)	7	primer3F (5'-3')	forward primer sequence pair_3
			8	localization	consensus localization based on the max(Chr.cpm, Cyt.cpm, Nuc.cpm)	8	primer3R (5'-3')	reverse primer sequence pair_3
			9	geneClass	gene class of the targeted lncRNA
			10	expression	CAGE expression level of the lncRNA target (TPM)

## Sheet: Table S2A
	KD.pubID	KD.geneSymbol	Description	perturb_id	ASO_source	ASO_seq	ASO_length
1	A1BG-AS1	A1BG-AS1	Targeted lncRNA	ASO_G0268895_01	Exiqon	TGGTCTTCATCACGTC	16
2	A1BG-AS1	A1BG-AS1	Targeted lncRNA	ASO_G0268895_02	Exiqon	TAAGTTAGGGACTGAT	16
3	A1BG-AS1	A1BG-AS1	Targeted lncRNA	ASO_G0268895_03	Exiqon	AGGGTGCAACGAGGCT	16
4	A1BG-AS1	A1BG-AS1	Targeted lncRNA	ASO_G0268895_04	Exiqon	GTCTGACTTCTGAGTT	16
5	A1BG-AS1	A1BG-AS1	Targeted lncRNA	ASO_G0268895_10	Exiqon	GGCAACCGCAGAAAGT	16
6	AC004980.7	AC004980.7	Targeted lncRNA	ASO_G0205485_01	Exiqon	TACGTTAGGGTGGCAT	16
7	AC004980.7	AC004980.7	Targeted lncRNA	ASO_G0205485_02	Exiqon	TGCGTCCGCTAATTGG	16
8	AC004980.7	AC004980.7	Targeted lncRNA	ASO_G0205485_03	Exiqon	GGAAAGGCAGAATTTG	16
9	AC004980.7	AC004980.7	Targeted lncRNA	ASO_G0205485_05	Exiqon	TCGATGCCACTTCACC	16
10	AC004980.7	AC004980.7	Targeted lncRNA	ASO_G0205485_10	Exiqon	TGATTAGAAGCCACAG	16
11	SPRY4-AS1	AC005592.2	Targeted lncRNA	ASO_G0231185_01	Exiqon	AAAGTGCCATTCGGTG	16
12	SPRY4-AS1	AC005592.2	Targeted lncRNA	ASO_G0231185_02	Exiqon	TGGCTCCAACTGACGT	16
13	SPRY4-AS1	AC005592.2	Targeted lncRNA	ASO_G0231185_03	Exiqon	TGGATTTGAGAGGTGC	16
14	SPRY4-AS1	AC005592.2	Targeted lncRNA	ASO_G0231185_06	Exiqon	AAACCTCAGTGCCTTC	16
15	SPRY4-AS1	AC005592.2	Targeted lncRNA	ASO_G0231185_09	Exiqon	CGCCCTCCATTCATTA	16
16	MAP4K3-DT	AC007246.3	Targeted lncRNA	ASO_G0231312_01	Exiqon	AGGAAGCTAGATTACG	16
17	MAP4K3-DT	AC007246.3	Targeted lncRNA	ASO_G0231312_02	Exiqon	AGCTCGTTAGCATTCT	16
18	MAP4K3-DT	AC007246.3	Targeted lncRNA	ASO_G0231312_03	Exiqon	CACGAACCGTCAGAAA	16
19	MAP4K3-DT	AC007246.3	Targeted lncRNA	ASO_G0231312_04	Exiqon	GAAAGTAGGTAACGGC	16
20	MAP4K3-DT	AC007246.3	Targeted lncRNA	ASO_G0231312_05	Exiqon	TGACTAGAGTGACGGC	16
21	AC007773.2	AC007773.2	Targeted lncRNA	ASO_G0267213_01	Exiqon	ACGGCTGCCAATCTAG	16
22	AC007773.2	AC007773.2	Targeted lncRNA	ASO_G0267213_03	Exiqon	CGGTAAAGGACTTCCA	16
23	AC007773.2	AC007773.2	Targeted lncRNA	ASO_G0267213_04	Exiqon	CAAACCGGGCAATGCG	16
24	AC007773.2	AC007773.2	Targeted lncRNA	ASO_G0267213_06	Exiqon	TTCGTGAGCTCAGAAG	16
25	AC007773.2	AC007773.2	Targeted lncRNA	ASO_G0267213_10	Exiqon	ACATGAGGCTCTTCAG	16
26	MYOSLID	AC007879.7	Targeted lncRNA	ASO_G0229647_01	Exiqon	CGATTCAGCTTGACAA	16
27	MYOSLID	AC007879.7	Targeted lncRNA	ASO_G0229647_02	Exiqon	CACTATGGACTAATCA	16
28	MYOSLID	AC007879.7	Targeted lncRNA	ASO_G0229647_03	Exiqon	CTTTACCCGACCATTT	16
29	MYOSLID	AC007879.7	Targeted lncRNA	ASO_G0229647_04	Exiqon	AGTTAGGCCATGCATC	16
30	MYOSLID	AC007879.7	Targeted lncRNA	ASO_G0229647_06	Exiqon	TCAGGCAGGTGAGAGT	16
31	MYOSLID	AC007879.7	Targeted lncRNA	ASO_G0229647_AD_01	GeneDesign	CAATATTTCGGGTCAAGC	18
32	MYOSLID	AC007879.7	Targeted lncRNA	ASO_G0229647_AD_04	GeneDesign	CCCGAAGAGCAAGATAGG	18
33	MYOSLID	AC007879.7	Targeted lncRNA	ASO_G0229647_AD_05	GeneDesign	CTTTATTCGTCAGGTCAC	18
34	MYOSLID	AC007879.7	Targeted lncRNA	ASO_G0229647_AD_06	GeneDesign	GCTTAAACGCCCTACCTG	18
35	MYOSLID	AC007879.7	Targeted lncRNA	ASO_G0229647_AD_09	GeneDesign	TATCTGAATGCCCAACGG	18
36	AC009005.2	AC009005.2	Targeted lncRNA	ASO_G0267751_01	Exiqon	GCGACAGGTTAATAGT	16
37	AC009005.2	AC009005.2	Targeted lncRNA	ASO_G0267751_04	Exiqon	ATTTACTTCCTTGACG	16
38	AC009005.2	AC009005.2	Targeted lncRNA	ASO_G0267751_06	Exiqon	CAATGAAGCAGTCGGA	16
39	AC009005.2	AC009005.2	Targeted lncRNA	ASO_G0267751_07	Exiqon	TGGATGGTCTGGGTCT	16
40	AC009005.2	AC009005.2	Targeted lncRNA	ASO_G0267751_09	Exiqon	TGCGTGGGATGCAATC	16
41	AC009005.2	AC009005.2	Targeted lncRNA	ASO_G0267751_AD_01	GeneDesign	AACAAGTTTCCCGCCG	16
42	AC009005.2	AC009005.2	Targeted lncRNA	ASO_G0267751_AD_02	GeneDesign	AATTCAGCCCAAGCGTAC	18
43	AC009005.2	AC009005.2	Targeted lncRNA	ASO_G0267751_AD_04	GeneDesign	GACCACTTTACTTGTACG	18
44	AC009005.2	AC009005.2	Targeted lncRNA	ASO_G0267751_AD_05	GeneDesign	GAGTCTGGGTTTACGC	16
45	AC009005.2	AC009005.2	Targeted lncRNA	ASO_G0267751_AD_09	GeneDesign	TCGTTCTTCGTTTCCTAC	18
46	AC009237.8	AC009237.8	Targeted lncRNA	ASO_G0229689_01	Exiqon	CAATTCAGGTAGTGTG	16
47	AC009237.8	AC009237.8	Targeted lncRNA	ASO_G0229689_02	Exiqon	GCCATCAAAGCACTTC	16
48	AC009237.8	AC009237.8	Targeted lncRNA	ASO_G0229689_03	Exiqon	TAGTGGCTGGGCAGTA	16
49	AC009237.8	AC009237.8	Targeted lncRNA	ASO_G0229689_04	Exiqon	ATCCAACATCACAAAC	16
50	AC009237.8	AC009237.8	Targeted lncRNA	ASO_G0229689_07	Exiqon	AGCACGGGAGGACTAT	16
51	CHROMR	AC009948.5	Targeted lncRNA	ASO_G0223960_01	Exiqon	CATTAGGTGGAAGTCT	16
52	CHROMR	AC009948.5	Targeted lncRNA	ASO_G0223960_02	Exiqon	AATAGGACTATGGAGG	16
53	CHROMR	AC009948.5	Targeted lncRNA	ASO_G0223960_03	Exiqon	GTCAATAGAGAATGCA	16
54	CHROMR	AC009948.5	Targeted lncRNA	ASO_G0223960_04	Exiqon	AACCTTACACGTTGCT	16
55	CHROMR	AC009948.5	Targeted lncRNA	ASO_G0223960_08	Exiqon	TACTGAGTGGGCATTT	16
56	CHROMR	AC009948.5	Targeted lncRNA	ASO_G0223960_AD_01	GeneDesign	ACCCGTAGGCATAGTC	16
57	CHROMR	AC009948.5	Targeted lncRNA	ASO_G0223960_AD_03	GeneDesign	ATCCTAACAAGACGCAGT	18
58	CHROMR	AC009948.5	Targeted lncRNA	ASO_G0223960_AD_04	GeneDesign	CGAAACCCGCCCAGATTC	18
59	CHROMR	AC009948.5	Targeted lncRNA	ASO_G0223960_AD_05	GeneDesign	CTAATCCCATACTCAGCG	18
60	CHROMR	AC009948.5	Targeted lncRNA	ASO_G0223960_AD_10	GeneDesign	TATTTGATGAAGAGCCGC	18
61	ZNF232-AS1	AC012146.7	Targeted lncRNA	ASO_G0234327_01	Exiqon	TAGCGAGCGTGGAAGA	16
62	ZNF232-AS1	AC012146.7	Targeted lncRNA	ASO_G0234327_06	Exiqon	CGCTCCGCTCAAGTCC	16
63	ZNF232-AS1	AC012146.7	Targeted lncRNA	ASO_G0234327_07	Exiqon	AGGCATCTGGAAATTC	16
64	ZNF232-AS1	AC012146.7	Targeted lncRNA	ASO_G0234327_08	Exiqon	TTCAGGCTCTGTCAAT	16
65	ZNF232-AS1	AC012146.7	Targeted lncRNA	ASO_G0234327_10	Exiqon	CTGCGCAAGGACTGCA	16
66	LINC01535	AC012309.5	Targeted lncRNA	ASO_G0226686_01	Exiqon	GAAGCTCCTAATGATC	16
67	LINC01535	AC012309.5	Targeted lncRNA	ASO_G0226686_03	Exiqon	GCGATGGCCGATTGAA	16
68	LINC01535	AC012309.5	Targeted lncRNA	ASO_G0226686_04	Exiqon	TAAGGACCACAAACAA	16
69	LINC01535	AC012309.5	Targeted lncRNA	ASO_G0226686_05	Exiqon	CGCTCAGCCGAACATC	16
70	LINC01535	AC012309.5	Targeted lncRNA	ASO_G0226686_07	Exiqon	GCTCTGAAAGACATGC	16
71	LINC01578	AC013394.2	Targeted lncRNA	ASO_G0272888_01	Exiqon	CTTTAGAGGATTCAGT	16
72	LINC01578	AC013394.2	Targeted lncRNA	ASO_G0272888_02	Exiqon	CCATAGTAGACTGCCA	16
73	LINC01578	AC013394.2	Targeted lncRNA	ASO_G0272888_04	Exiqon	AGAACCCTGTCTTGGT	16
74	LINC01578	AC013394.2	Targeted lncRNA	ASO_G0272888_05	Exiqon	GTAGGGTCCATTTGAA	16
75	LINC01578	AC013394.2	Targeted lncRNA	ASO_G0272888_08	Exiqon	CTGTGACGCCGACGCG	16
76	LINC01578	AC013394.2	Targeted lncRNA	ASO_G0272888_AD_04	GeneDesign	CCTACGATCAGCAAATGC	18
77	LINC01578	AC013394.2	Targeted lncRNA	ASO_G0272888_AD_06	GeneDesign	GCGTCATTACTCGGTA	16
78	LINC01578	AC013394.2	Targeted lncRNA	ASO_G0272888_AD_07	GeneDesign	GTCGAATAAACCAGTATC	18
79	LINC01578	AC013394.2	Targeted lncRNA	ASO_G0272888_AD_09	GeneDesign	TTCGGACAGATCATAATC	18
80	LINC01578	AC013394.2	Targeted lncRNA	ASO_G0272888_AD_10	GeneDesign	TTGATAAGACTGCACGCC	18
81	AC016747.3	AC016747.3	Targeted lncRNA	ASO_G0212978_01	Exiqon	TACAAGCTTTAGGACA	16
82	AC016747.3	AC016747.3	Targeted lncRNA	ASO_G0212978_02	Exiqon	GATCAATAGGAAGCAC	16
83	AC016747.3	AC016747.3	Targeted lncRNA	ASO_G0212978_03	Exiqon	AAGCAGGAGTGAGATA	16
84	AC016747.3	AC016747.3	Targeted lncRNA	ASO_G0212978_04	Exiqon	ATCGTTGGGTGAGGTT	16
85	AC016747.3	AC016747.3	Targeted lncRNA	ASO_G0212978_06	Exiqon	TCAGAGATCCAGAGTC	16
86	LINC01116	AC017048.3	Targeted lncRNA	ASO_G0163364_01	Exiqon	AATTACTGCATTCACG	16
87	LINC01116	AC017048.3	Targeted lncRNA	ASO_G0163364_02	Exiqon	TAGTGAGAGTGATGAT	16
88	LINC01116	AC017048.3	Targeted lncRNA	ASO_G0163364_03	Exiqon	GCAATTACCCTAAGTT	16
89	LINC01116	AC017048.3	Targeted lncRNA	ASO_G0163364_04	Exiqon	ACTAATCATGGAATGA	16
90	LINC01116	AC017048.3	Targeted lncRNA	ASO_G0163364_06	Exiqon	AGACTTTGGTGGGAGC	16
91	LINC01116	AC017048.3	Targeted lncRNA	ASO_G0163364_AD_01	GeneDesign	GATCGATGCCAAGTTT	16
92	LINC01116	AC017048.3	Targeted lncRNA	ASO_G0163364_AD_02	GeneDesign	TTTCGAACAGGCAGATT	17
93	LINC01116	AC017048.3	Targeted lncRNA	ASO_G0163364_AD_03	GeneDesign	GCCCATAATAAGTTAAATG	19
94	LINC01116	AC017048.3	Targeted lncRNA	ASO_G0163364_AD_09	GeneDesign	ATAAGGATTAGTTGGTGGA	19
95	LINC01116	AC017048.3	Targeted lncRNA	ASO_G0163364_AD_10	GeneDesign	CGCGTTGATGAGCTAA	16
96	LINC01117	AC017048.4	Targeted lncRNA	ASO_G0224577_01	Exiqon	GCCGAGTCCTTAAGTC	16
97	LINC01117	AC017048.4	Targeted lncRNA	ASO_G0224577_02	Exiqon	CGCGGTGACTGACATG	16
98	LINC01117	AC017048.4	Targeted lncRNA	ASO_G0224577_03	Exiqon	ACACTTAGAAATGAGA	16
99	LINC01117	AC017048.4	Targeted lncRNA	ASO_G0224577_04	Exiqon	GTGACTTCATCTTGCT	16
100	LINC01117	AC017048.4	Targeted lncRNA	ASO_G0224577_05	Exiqon	TCAGGGTCAGGAGGTA	16
101	LINC01117	AC017048.4	Targeted lncRNA	ASO_G0224577_AD_02	GeneDesign	CCGCTCAACACCAAAGT	17
102	LINC01117	AC017048.4	Targeted lncRNA	ASO_G0224577_AD_05	GeneDesign	GTAGCATCTAGCACTAGTG	19
103	LINC01117	AC017048.4	Targeted lncRNA	ASO_G0224577_AD_08	GeneDesign	ATACGACTAGAGGATA	16
104	LINC01117	AC017048.4	Targeted lncRNA	ASO_G0224577_AD_09	GeneDesign	CGCACAAGACTAATTCA	17
105	LINC01117	AC017048.4	Targeted lncRNA	ASO_G0224577_AD_10	GeneDesign	CATCCGCTCGCATACA	16
106	AC018464.3	AC018464.3	Targeted lncRNA	ASO_G0234520_01	Exiqon	TCGAGATAACAAATTC	16
107	AC018464.3	AC018464.3	Targeted lncRNA	ASO_G0234520_04	Exiqon	AATCCACACTTCTGTA	16
108	AC018464.3	AC018464.3	Targeted lncRNA	ASO_G0234520_05	Exiqon	GCATCCAGAGTGATTC	16
109	AC018464.3	AC018464.3	Targeted lncRNA	ASO_G0234520_06	Exiqon	ACTGAAATCTTAGTCT	16
110	AC018464.3	AC018464.3	Targeted lncRNA	ASO_G0234520_08	Exiqon	TCGCCCTCCATAATCG	16
111	LSP1P4	AC027612.6	Targeted lncRNA	ASO_G0143429_01	Exiqon	GTTAAGTAATGAACGT	16
112	LSP1P4	AC027612.6	Targeted lncRNA	ASO_G0143429_03	Exiqon	GTGACTCATGGCTTTG	16
113	LSP1P4	AC027612.6	Targeted lncRNA	ASO_G0143429_04	Exiqon	GTCAGTGTGGAAGGAA	16
114	LSP1P4	AC027612.6	Targeted lncRNA	ASO_G0143429_05	Exiqon	GCCGTGCGATGAACTA	16
115	LSP1P4	AC027612.6	Targeted lncRNA	ASO_G0143429_06	Exiqon	TTCGTGGTCTGATGCC	16
116	LSP1P4	AC027612.6	Targeted lncRNA	ASO_G0143429_AD_01	GeneDesign	AACTGTCGAACCAAACCC	18
117	LSP1P4	AC027612.6	Targeted lncRNA	ASO_G0143429_AD_02	GeneDesign	AAGCTCTTACTACGGTTG	18
118	LSP1P4	AC027612.6	Targeted lncRNA	ASO_G0143429_AD_03	GeneDesign	ACCAGACTATCGCAGGGT	18
119	LSP1P4	AC027612.6	Targeted lncRNA	ASO_G0143429_AD_05	GeneDesign	AGTATGACAACGGATTGG	18
120	LSP1P4	AC027612.6	Targeted lncRNA	ASO_G0143429_AD_06	GeneDesign	ATCGTGTAGTCCTTGA	16
121	AC046143.3	AC046143.3	Targeted lncRNA	ASO_G0229334_01	Exiqon	GATGGCTCAGTAATAG	16
122	AC046143.3	AC046143.3	Targeted lncRNA	ASO_G0229334_03	Exiqon	ACTTAGGCTGCACTGT	16
123	AC046143.3	AC046143.3	Targeted lncRNA	ASO_G0229334_05	Exiqon	GTGGGAATGCAAACGA	16
124	AC046143.3	AC046143.3	Targeted lncRNA	ASO_G0229334_06	Exiqon	GTCTAACCCGGCATTA	16
125	AC046143.3	AC046143.3	Targeted lncRNA	ASO_G0229334_08	Exiqon	AATGGAACATTGCTCT	16
126	AC084219.4	AC084219.4	Targeted lncRNA	ASO_G0186019_01	Exiqon	GTAGGCGAGATCTTTA	16
127	AC084219.4	AC084219.4	Targeted lncRNA	ASO_G0186019_02	Exiqon	ATAAGTGTGACGTGTG	16
128	AC084219.4	AC084219.4	Targeted lncRNA	ASO_G0186019_03	Exiqon	GGAAGAGCTTTAGTCG	16
129	AC084219.4	AC084219.4	Targeted lncRNA	ASO_G0186019_06	Exiqon	GTGTGGTAAGGAATTC	16
130	AC084219.4	AC084219.4	Targeted lncRNA	ASO_G0186019_09	Exiqon	AAGAGCTTCTGTGGTA	16
131	ZFAND2A-DT	AC091729.9	Targeted lncRNA	ASO_G0229043_01	Exiqon	TACGAATCAACTGACA	16
132	ZFAND2A-DT	AC091729.9	Targeted lncRNA	ASO_G0229043_02	Exiqon	TCACCGATGGAGGTTA	16
133	ZFAND2A-DT	AC091729.9	Targeted lncRNA	ASO_G0229043_03	Exiqon	GCTAGATGGCTGGTAT	16
134	ZFAND2A-DT	AC091729.9	Targeted lncRNA	ASO_G0229043_06	Exiqon	GGTGTAGAAGAAACTA	16
135	ZFAND2A-DT	AC091729.9	Targeted lncRNA	ASO_G0229043_07	Exiqon	GATCCATCCTAGGTGT	16
136	ZFAND2A-DT	AC091729.9	Targeted lncRNA	ASO_G0229043_AD_01	GeneDesign	AACCGAGAGTAAAGAC	16
137	ZFAND2A-DT	AC091729.9	Targeted lncRNA	ASO_G0229043_AD_04	GeneDesign	CGCAACTACACAGGTT	16
138	ZFAND2A-DT	AC091729.9	Targeted lncRNA	ASO_G0229043_AD_05	GeneDesign	CGGATGGGTCGCTAGG	16
139	ZFAND2A-DT	AC091729.9	Targeted lncRNA	ASO_G0229043_AD_06	GeneDesign	CGTAGTTTCTTGATTG	16
140	ZFAND2A-DT	AC091729.9	Targeted lncRNA	ASO_G0229043_AD_10	GeneDesign	TATTGATTAGGCGACC	16
141	ZNF529-AS1	AC092295.7	Targeted lncRNA	ASO_G0233527_01	Exiqon	CCACTAGAATAGAGCT	16
142	ZNF529-AS1	AC092295.7	Targeted lncRNA	ASO_G0233527_02	Exiqon	CTAGAAGGGAAACAGT	16
143	ZNF529-AS1	AC092295.7	Targeted lncRNA	ASO_G0233527_03	Exiqon	GAAACAGTGGTGCAAC	16
144	ZNF529-AS1	AC092295.7	Targeted lncRNA	ASO_G0233527_05	Exiqon	ACATGACCCAGAAGGT	16
145	ZNF529-AS1	AC092295.7	Targeted lncRNA	ASO_G0233527_07	Exiqon	ATTACCCAGCAACTTT	16
146	ITGA9-AS1	AC093415.2	Targeted lncRNA	ASO_G0235257_01	Exiqon	CGCCAGATAGATTCTT	16
147	ITGA9-AS1	AC093415.2	Targeted lncRNA	ASO_G0235257_04	Exiqon	AGATGGTCTGACTTTT	16
148	ITGA9-AS1	AC093415.2	Targeted lncRNA	ASO_G0235257_06	Exiqon	CAGTCAAGTCCTTCTT	16
149	ITGA9-AS1	AC093415.2	Targeted lncRNA	ASO_G0235257_07	Exiqon	TAAATGGGATGCCACA	16
150	ITGA9-AS1	AC093415.2	Targeted lncRNA	ASO_G0235257_09	Exiqon	TGGGTGGAGAACAAAG	16
151	AC093627.10	AC093627.10	Targeted lncRNA	ASO_G0240859_03	Exiqon	TCGTGGAAGGCTTGAG	16
152	AC093627.10	AC093627.10	Targeted lncRNA	ASO_G0240859_04	Exiqon	CAACTTGGTCTTGGAC	16
153	AC093627.10	AC093627.10	Targeted lncRNA	ASO_G0240859_05	Exiqon	CCAGTCCCCATAAATG	16
154	AC093627.10	AC093627.10	Targeted lncRNA	ASO_G0240859_08	Exiqon	AGCGTGCACAGTGAAC	16
155	AC093627.10	AC093627.10	Targeted lncRNA	ASO_G0240859_09	Exiqon	CGGGCTTTAGAACCAA	16
156	AC093627.9	AC093627.9	Targeted lncRNA	ASO_G0242474_01	Exiqon	TAAGTTAGGCTCAGTT	16
157	AC093627.9	AC093627.9	Targeted lncRNA	ASO_G0242474_02	Exiqon	AGGCGGAAGCAACGGA	16
158	AC093627.9	AC093627.9	Targeted lncRNA	ASO_G0242474_04	Exiqon	AACTTCCCTGATTAGC	16
159	AC093627.9	AC093627.9	Targeted lncRNA	ASO_G0242474_05	Exiqon	AAACACCTGGATTAGT	16
160	AC093627.9	AC093627.9	Targeted lncRNA	ASO_G0242474_06	Exiqon	AGACCATTCTTTGACT	16
161	RNASEH1-AS1	AC108488.3	Targeted lncRNA	ASO_G0234171_01	Exiqon	TTCAAAGTCCGGTGTG	16
162	RNASEH1-AS1	AC108488.3	Targeted lncRNA	ASO_G0234171_02	Exiqon	ACGTGCAGTGGAGCAG	16
163	RNASEH1-AS1	AC108488.3	Targeted lncRNA	ASO_G0234171_03	Exiqon	TTGGACGATGCAGGTC	16
164	RNASEH1-AS1	AC108488.3	Targeted lncRNA	ASO_G0234171_06	Exiqon	GGTTACCGCACGTGG	15
165	RNASEH1-AS1	AC108488.3	Targeted lncRNA	ASO_G0234171_09	Exiqon	CTTGAGGCACTGGATA	16
166	AC108488.4	AC108488.4	Targeted lncRNA	ASO_G0242282_06	Exiqon	CAGGTCCCCTCAACGC	16
167	AC108488.4	AC108488.4	Targeted lncRNA	ASO_G0242282_07	Exiqon	ACACTGCGACATAGGT	16
168	AC108488.4	AC108488.4	Targeted lncRNA	ASO_G0242282_08	Exiqon	CATAGGTGTCTGGAGA	16
169	AC108488.4	AC108488.4	Targeted lncRNA	ASO_G0242282_09	Exiqon	AGATAAGGAGAGGGTT	16
170	AC108488.4	AC108488.4	Targeted lncRNA	ASO_G0242282_10	Exiqon	ATAGCTGAGGCCGAAC	16
171	AC112721.2	AC112721.2	Targeted lncRNA	ASO_G0222032_01	Exiqon	GGCGGACACTGATTCA	16
172	AC112721.2	AC112721.2	Targeted lncRNA	ASO_G0222032_02	Exiqon	TGTCAATCCACAGAAT	16
173	AC112721.2	AC112721.2	Targeted lncRNA	ASO_G0222032_03	Exiqon	GAGAGCGTCTAGTGCA	16
174	AC112721.2	AC112721.2	Targeted lncRNA	ASO_G0222032_06	Exiqon	CACGAATGGCCGAGAA	16
175	AC112721.2	AC112721.2	Targeted lncRNA	ASO_G0222032_10	Exiqon	GCTCACAAAAGCAAAT	16
176	AC124789.1	AC124789.1	Targeted lncRNA	ASO_G0260833_01	Exiqon	ACACCGAATCCTTAGT	16
177	AC124789.1	AC124789.1	Targeted lncRNA	ASO_G0260833_02	Exiqon	CAGTGGATGGTGGAAT	16
178	AC124789.1	AC124789.1	Targeted lncRNA	ASO_G0260833_03	Exiqon	GGGACATCTTGATGGT	16
179	AC124789.1	AC124789.1	Targeted lncRNA	ASO_G0260833_06	Exiqon	AGGCCAGACTTGGAGC	16
180	AC124789.1	AC124789.1	Targeted lncRNA	ASO_G0260833_07	Exiqon	GGAGCTGCATCTGCTT	16
181	AC124789.1	AC124789.1	Targeted lncRNA	ASO_G0260833_AD_01	GeneDesign	AAACCCATGTTGCGTC	16
182	AC124789.1	AC124789.1	Targeted lncRNA	ASO_G0260833_AD_05	GeneDesign	ATCCCGACCTCCCTCG	16
183	AC124789.1	AC124789.1	Targeted lncRNA	ASO_G0260833_AD_06	GeneDesign	TAGCGATGGAAGTGGG	16
184	AC124789.1	AC124789.1	Targeted lncRNA	ASO_G0260833_AD_07	GeneDesign	TGAATTCCGCAGAGGT	16
185	AC124789.1	AC124789.1	Targeted lncRNA	ASO_G0260833_AD_10	GeneDesign	TTTGGAGAGTATGACGGA	18
186	AC144652.1	AC144652.1	Targeted lncRNA	ASO_G0273117_01	Exiqon	TGTATGAACACTGGTT	16
187	AC144652.1	AC144652.1	Targeted lncRNA	ASO_G0273117_03	Exiqon	ATAAACAAATCTTCGA	16
188	AC144652.1	AC144652.1	Targeted lncRNA	ASO_G0273117_06	Exiqon	ATCAGCGTGCGGGACG	16
189	AC144652.1	AC144652.1	Targeted lncRNA	ASO_G0273117_09	Exiqon	GGATAGGTCGCTAAGA	16
190	AC144652.1	AC144652.1	Targeted lncRNA	ASO_G0273117_10	Exiqon	CAAGACCCAAACTGCA	16
191	AHR	AHR	Positive Control	ASO_C0011632_01	Exiqon	ATTGCTTGGTGATGAA	16
192	AHR	AHR	Positive Control	ASO_C0011632_03	Exiqon	TCTGGCATCCCGATTG	16
193	AHR	AHR	Positive Control	ASO_C0011632_05	Exiqon	CTGAAACAACTCCAGT	16
194	AHR	AHR	Positive Control	ASO_C0011632_06	Exiqon	CTGAACAAATGGGACT	16
195	AHR	AHR	Positive Control	ASO_C0011632_10	Exiqon	TCTGCAGACCAGGTTA	16
196	AHR	AHR	Positive Control	ASO_C0011632_AD_01	GeneDesign	ATCGGAGGAAGAGTTGCG	18
197	AHR	AHR	Positive Control	ASO_C0011632_AD_03	GeneDesign	CAATAGGTAGCGTCATAT	18
198	AHR	AHR	Positive Control	ASO_C0011632_AD_07	GeneDesign	GTAAGCAGGATTGACGAG	18
199	AHR	AHR	Positive Control	ASO_C0011632_AD_08	GeneDesign	TACGACATTATGCCAGGA	18
200	AHR	AHR	Positive Control	ASO_C0011632_AD_10	GeneDesign	TTATTAGGGCGAAATCTC	18
201	AMZ2P1	AMZ2P1	Targeted lncRNA	ASO_G0214174_02	Exiqon	TTACCAATGGACCGTA	16
202	AMZ2P1	AMZ2P1	Targeted lncRNA	ASO_G0214174_03	Exiqon	ACGAGACTTTTTGAAT	16
203	AMZ2P1	AMZ2P1	Targeted lncRNA	ASO_G0214174_05	Exiqon	CACAAGCACTGGATTC	16
204	AMZ2P1	AMZ2P1	Targeted lncRNA	ASO_G0214174_06	Exiqon	CACAGCACAAGATCAA	16
205	AMZ2P1	AMZ2P1	Targeted lncRNA	ASO_G0214174_09	Exiqon	AGAACAGTCAGGCATT	16
206	AP000704.5	AP000704.5	Targeted lncRNA	ASO_G0224790_02	Exiqon	CCATAATTCAGCAAAC	16
207	AP000704.5	AP000704.5	Targeted lncRNA	ASO_G0224790_03	Exiqon	GTGAAACATTTAGGAT	16
208	AP000704.5	AP000704.5	Targeted lncRNA	ASO_G0224790_07	Exiqon	TTACCATGCAGGAACC	16
209	AP000704.5	AP000704.5	Targeted lncRNA	ASO_G0224790_08	Exiqon	TGTCCTGGAGTGGCC	15
210	AP000704.5	AP000704.5	Targeted lncRNA	ASO_G0224790_10	Exiqon	TCAGCGGGAACTGCAC	16
211	FAM111A-DT	AP001258.4	Targeted lncRNA	ASO_G0245571_01	Exiqon	TGGTAAAGGTTGGTTA	16
212	FAM111A-DT	AP001258.4	Targeted lncRNA	ASO_G0245571_03	Exiqon	TTAGGAAGAAACGGCT	16
213	FAM111A-DT	AP001258.4	Targeted lncRNA	ASO_G0245571_05	Exiqon	GGCTAATCCTCTGTCG	16
214	FAM111A-DT	AP001258.4	Targeted lncRNA	ASO_G0245571_06	Exiqon	CCAAGGGAAAAGGGAC	16
215	FAM111A-DT	AP001258.4	Targeted lncRNA	ASO_G0245571_08	Exiqon	AACAGAACTCATTGGT	16
216	FAM111A-DT	AP001258.4	Targeted lncRNA	ASO_G0245571_AD_01	GeneDesign	ACCCAACTAGCCTCAGCG	18
217	FAM111A-DT	AP001258.4	Targeted lncRNA	ASO_G0245571_AD_02	GeneDesign	ACTCCGTTAAGTCCATCC	18
218	FAM111A-DT	AP001258.4	Targeted lncRNA	ASO_G0245571_AD_03	GeneDesign	ATCAAGGTTTAACGGC	16
219	FAM111A-DT	AP001258.4	Targeted lncRNA	ASO_G0245571_AD_07	GeneDesign	TCAACTTCGTAGATTG	16
220	FAM111A-DT	AP001258.4	Targeted lncRNA	ASO_G0245571_AD_09	GeneDesign	TGAGACAGTATTAGCGGG	18
221	ARHGAP5-AS1	ARHGAP5-AS1	Targeted lncRNA	ASO_G0258655_01	Exiqon	TCACGCCAATGGGTAA	16
222	ARHGAP5-AS1	ARHGAP5-AS1	Targeted lncRNA	ASO_G0258655_02	Exiqon	ACCAGAAACCGGAACA	16
223	ARHGAP5-AS1	ARHGAP5-AS1	Targeted lncRNA	ASO_G0258655_05	Exiqon	AAAAGCCAGGTGGACG	16
224	ARHGAP5-AS1	ARHGAP5-AS1	Targeted lncRNA	ASO_G0258655_07	Exiqon	TAGTGGCGTGAACAGG	16
225	ARHGAP5-AS1	ARHGAP5-AS1	Targeted lncRNA	ASO_G0258655_08	Exiqon	TAGTTGGCGAGCGATC	16
226	BAZ2B	BAZ2B	Positive Control	ASO_G0226266_01	Exiqon	TGCCATAGCTCAGGAA	16
227	BAZ2B	BAZ2B	Positive Control	ASO_G0226266_02	Exiqon	GCTTCTGAAGATCCAA	16
228	BAZ2B	BAZ2B	Positive Control	ASO_G0226266_05	Exiqon	TAGTTACCACTGCCAG	16
229	BAZ2B	BAZ2B	Positive Control	ASO_G0226266_07	Exiqon	ATAATCTGCCAAAATC	16
230	BAZ2B	BAZ2B	Positive Control	ASO_G0226266_10	Exiqon	CAGTTGAAGAACTTCC	16
231	BOLA3-AS1	BOLA3-AS1	Targeted lncRNA	ASO_G0225439_01	Exiqon	GACAGGCTAGTAATTG	16
232	BOLA3-AS1	BOLA3-AS1	Targeted lncRNA	ASO_G0225439_03	Exiqon	GGAGAGGCTTGGTTGA	16
233	BOLA3-AS1	BOLA3-AS1	Targeted lncRNA	ASO_G0225439_06	Exiqon	TGAGGAGGAATGAGAC	16
234	BOLA3-AS1	BOLA3-AS1	Targeted lncRNA	ASO_G0225439_08	Exiqon	CATCCAAGTGCAACGC	16
235	BOLA3-AS1	BOLA3-AS1	Targeted lncRNA	ASO_G0225439_09	Exiqon	AAGGAGAGCGGCGCGA	16
236	BOLA3-AS1	BOLA3-AS1	Targeted lncRNA	ASO_G0225439_AD_01	GeneDesign	AGCGATCTTTCTCAAGCG	18
237	BOLA3-AS1	BOLA3-AS1	Targeted lncRNA	ASO_G0225439_AD_02	GeneDesign	CCAGAGGCGGGACGAATT	18
238	BOLA3-AS1	BOLA3-AS1	Targeted lncRNA	ASO_G0225439_AD_03	GeneDesign	CCGACCCTAAACCAGT	16
239	BOLA3-AS1	BOLA3-AS1	Targeted lncRNA	ASO_G0225439_AD_04	GeneDesign	CGCTCGATTCCATTCACC	18
240	BOLA3-AS1	BOLA3-AS1	Targeted lncRNA	ASO_G0225439_AD_08	GeneDesign	GTACATCAGGAGCACG	16
241	BX322557.10	BX322557.10	Targeted lncRNA	ASO_G0215447_01	Exiqon	GACGAGACGCTGAAGT	16
242	BX322557.10	BX322557.10	Targeted lncRNA	ASO_G0215447_02	Exiqon	CCATTAACCATTGACA	16
243	BX322557.10	BX322557.10	Targeted lncRNA	ASO_G0215447_03	Exiqon	GACGGACGACACTCAG	16
244	BX322557.10	BX322557.10	Targeted lncRNA	ASO_G0215447_05	Exiqon	AAACTCCCGTCACTGT	16
245	BX322557.10	BX322557.10	Targeted lncRNA	ASO_G0215447_08	Exiqon	TGTCAAATTACTGGAT	16
246	C11orf95	C11orf95	Targeted lncRNA	ASO_G0188070_01	Exiqon	ATCCACCGCGGACAA	15
247	C11orf95	C11orf95	Targeted lncRNA	ASO_G0188070_02	Exiqon	CAATGCAAGGAGTAGG	16
248	C11orf95	C11orf95	Targeted lncRNA	ASO_G0188070_03	Exiqon	ACTCTGGATCCGAAAA	16
249	C11orf95	C11orf95	Targeted lncRNA	ASO_G0188070_04	Exiqon	CCAGTGGTCGTGGTAG	16
250	C11orf95	C11orf95	Targeted lncRNA	ASO_G0188070_05	Exiqon	CTCGGCGCTAACACGT	16
251	C11orf95	C11orf95	Targeted lncRNA	ASO_G0188070_AD_02	GeneDesign	ACGACACTGGCTAGCTG	17
252	C11orf95	C11orf95	Targeted lncRNA	ASO_G0188070_AD_05	GeneDesign	AAGCTGTCATGGACATCGG	19
253	C11orf95	C11orf95	Targeted lncRNA	ASO_G0188070_AD_06	GeneDesign	TTCCTCTGGCTCCGCG	16
254	C11orf95	C11orf95	Targeted lncRNA	ASO_G0188070_AD_07	GeneDesign	CAATGGAATCACTACCG	17
255	C11orf95	C11orf95	Targeted lncRNA	ASO_G0188070_AD_08	GeneDesign	CACACCAGCCGGTTCC	16
256	PCOTH	C1QTNF9B-AS1	Targeted lncRNA	ASO_G0205861_03	Exiqon	AATAAGAGGCTGGAAA	16
257	PCOTH	C1QTNF9B-AS1	Targeted lncRNA	ASO_G0205861_04	Exiqon	AATAAGGGTGACGTG	15
258	PCOTH	C1QTNF9B-AS1	Targeted lncRNA	ASO_G0205861_05	Exiqon	GAGATCGAGGAGAGAA	16
259	PCOTH	C1QTNF9B-AS1	Targeted lncRNA	ASO_G0205861_07	Exiqon	GGAAAGGAGATCGAG	15
260	PCOTH	C1QTNF9B-AS1	Targeted lncRNA	ASO_G0205861_10	Exiqon	GTCACCTCTGCTTTGA	16
261	CATG00000011013.1	CATG00000011013.1	Targeted lncRNA	ASO_C0018982_01	Exiqon	CCATAGGTTGACAATG	16
262	CATG00000011013.1	CATG00000011013.1	Targeted lncRNA	ASO_C0018982_02	Exiqon	AAAGGCAGGCTCAGT	15
263	CATG00000011013.1	CATG00000011013.1	Targeted lncRNA	ASO_C0018982_04	Exiqon	AGCAGAGTCAGGCTAA	16
264	CATG00000011013.1	CATG00000011013.1	Targeted lncRNA	ASO_C0018982_06	Exiqon	TGCAAACCCTTCTGTC	16
265	CATG00000011013.1	CATG00000011013.1	Targeted lncRNA	ASO_C0018982_09	Exiqon	GTCTGAGCTGCCTTTT	16
266	CATG00000016989.1	CATG00000016989.1	Targeted lncRNA	ASO_C0020443_01	Exiqon	ATTGAGTGCAAAGGAC	16
267	CATG00000016989.1	CATG00000016989.1	Targeted lncRNA	ASO_C0020443_02	Exiqon	ACTCTTGCACATGGTT	16
268	CATG00000016989.1	CATG00000016989.1	Targeted lncRNA	ASO_C0020443_03	Exiqon	CCAAAGCGCTTCCATC	16
269	CATG00000016989.1	CATG00000016989.1	Targeted lncRNA	ASO_C0020443_06	Exiqon	TGAGTGCCACTGAAGA	16
270	CATG00000016989.1	CATG00000016989.1	Targeted lncRNA	ASO_C0020443_10	Exiqon	AGTCCAGGTCCTTTAC	16
271	CATG00000017883.1	CATG00000017883.1	Positive Control	ASO_C0020672_01	Exiqon	TCGAACATGCAGGAAT	16
272	CATG00000017883.1	CATG00000017883.1	Positive Control	ASO_C0020672_02	Exiqon	GGATTGCATGGAAGGT	16
273	CATG00000017883.1	CATG00000017883.1	Positive Control	ASO_C0020672_03	Exiqon	GCGGAGGTGACTCAAT	16
274	CATG00000017883.1	CATG00000017883.1	Positive Control	ASO_C0020672_06	Exiqon	GCCAGAAATCAGGTAT	16
275	CATG00000017883.1	CATG00000017883.1	Positive Control	ASO_C0020672_07	Exiqon	GACAGTCCAAGTCTGC	16
276	CATG00000020700.1	CATG00000020700.1	Targeted lncRNA	ASO_C0020984_01	Exiqon	AGATAGGAGTAGCTGT	16
277	CATG00000020700.1	CATG00000020700.1	Targeted lncRNA	ASO_C0020984_02	Exiqon	CACGTAGAGAGACTAT	16
278	CATG00000020700.1	CATG00000020700.1	Targeted lncRNA	ASO_C0020984_05	Exiqon	ACGTAGAGAGACTAT	15
279	CATG00000020700.1	CATG00000020700.1	Targeted lncRNA	ASO_C0020984_08	Exiqon	TCCTGGCCACGTAGAG	16
280	CATG00000020700.1	CATG00000020700.1	Targeted lncRNA	ASO_C0020984_09	Exiqon	ATGATCTGGAAGCCTC	16
281	CATG00000034824.1	CATG00000034824.1	Targeted lncRNA	ASO_C0025760_01	Exiqon	TGTGCGGACTTGGACT	16
282	CATG00000034824.1	CATG00000034824.1	Targeted lncRNA	ASO_C0025760_02	Exiqon	GTGTGCTGATAATCGG	16
283	CATG00000034824.1	CATG00000034824.1	Targeted lncRNA	ASO_C0025760_03	Exiqon	TGTCCAGTGGCTTCGA	16
284	CATG00000034824.1	CATG00000034824.1	Targeted lncRNA	ASO_C0025760_07	Exiqon	GCGAGGAGTGGACGAG	16
285	CATG00000034824.1	CATG00000034824.1	Targeted lncRNA	ASO_C0025760_10	Exiqon	CCAGTCATAGAGTAGC	16
286	CATG00000035089.1	CATG00000035089.1	Targeted lncRNA	ASO_C0025854_01	Exiqon	AGAAAGAGTTACCGAA	16
287	CATG00000035089.1	CATG00000035089.1	Targeted lncRNA	ASO_C0025854_02	Exiqon	GGTAGAAGTAGCCTAT	16
288	CATG00000035089.1	CATG00000035089.1	Targeted lncRNA	ASO_C0025854_04	Exiqon	GAAGAGTAGGTGTAGA	16
289	CATG00000035089.1	CATG00000035089.1	Targeted lncRNA	ASO_C0025854_05	Exiqon	TGCTAGGAGGTCACTT	16
290	CATG00000035089.1	CATG00000035089.1	Targeted lncRNA	ASO_C0025854_09	Exiqon	GCTTCAGGTGGTAAAC	16
291	CATG00000073509.1	CATG00000073509.1	Targeted lncRNA	ASO_C0007786_01	Exiqon	GTTAATTCTTAGAGTC	16
292	CATG00000073509.1	CATG00000073509.1	Targeted lncRNA	ASO_C0007786_02	Exiqon	GTTGAGTGGACTGAGT	16
293	CATG00000073509.1	CATG00000073509.1	Targeted lncRNA	ASO_C0007786_03	Exiqon	AGGGTAGTCATAAATC	16
294	CATG00000073509.1	CATG00000073509.1	Targeted lncRNA	ASO_C0007786_04	Exiqon	GGTTGGACAATCTGTA	16
295	CATG00000073509.1	CATG00000073509.1	Targeted lncRNA	ASO_C0007786_08	Exiqon	TCTAGTAATAAAGAGC	16
296	CATG00000076290.1	CATG00000076290.1	Targeted lncRNA	ASO_C0008822_02	Exiqon	AAGCTGCAAGAACTAT	16
297	CATG00000076290.1	CATG00000076290.1	Targeted lncRNA	ASO_C0008822_03	Exiqon	CAGGCTGCTTCAATCT	16
298	CATG00000076290.1	CATG00000076290.1	Targeted lncRNA	ASO_C0008822_04	Exiqon	CAGTCATAGCCTTCAT	16
299	CATG00000076290.1	CATG00000076290.1	Targeted lncRNA	ASO_C0008822_07	Exiqon	AGAGGCCGGATGAGTT	16
300	CATG00000076290.1	CATG00000076290.1	Targeted lncRNA	ASO_C0008822_10	Exiqon	TACGGTCCTGCCTGAG	16
301	CATG00000079799.1	CATG00000079799.1	Targeted lncRNA	ASO_C0008586_03	Exiqon	CCAGCAGTCAAAGGGT	16
302	CATG00000079799.1	CATG00000079799.1	Targeted lncRNA	ASO_C0008586_04	Exiqon	GCCTTCCTAACTTCA	15
303	CATG00000079799.1	CATG00000079799.1	Targeted lncRNA	ASO_C0008586_05	Exiqon	GACATCAGACATTTA	15
304	CATG00000079799.1	CATG00000079799.1	Targeted lncRNA	ASO_C0008586_07	Exiqon	CATCAGGCAGATTGGA	16
305	CATG00000079799.1	CATG00000079799.1	Targeted lncRNA	ASO_C0008586_10	Exiqon	TAGTAGGTCCTCATGA	16
306	CATG00000079799.1	CATG00000079799.1	Targeted lncRNA	ASO_C0008586_AD_01	GeneDesign	AGACTTAAATGGCACGGG	18
307	CATG00000079799.1	CATG00000079799.1	Targeted lncRNA	ASO_C0008586_AD_02	GeneDesign	ATAACTTCAGTCCCGTAC	18
308	CATG00000079799.1	CATG00000079799.1	Targeted lncRNA	ASO_C0008586_AD_03	GeneDesign	CACAGGATAACCCGAGTC	18
309	CATG00000079799.1	CATG00000079799.1	Targeted lncRNA	ASO_C0008586_AD_06	GeneDesign	GATGCGATACAGATTAGC	18
310	CATG00000079799.1	CATG00000079799.1	Targeted lncRNA	ASO_C0008586_AD_09	GeneDesign	TCTACCGACACTCATAGT	18
311	CATG00000083589.1	CATG00000083589.1	Targeted lncRNA	ASO_C0010207_02	Exiqon	GGACTGGTGTGACTAT	16
312	CATG00000083589.1	CATG00000083589.1	Targeted lncRNA	ASO_C0010207_03	Exiqon	TACGACTTTAGAGTAT	16
313	CATG00000083589.1	CATG00000083589.1	Targeted lncRNA	ASO_C0010207_04	Exiqon	ACAGCACATCGTTACG	16
314	CATG00000083589.1	CATG00000083589.1	Targeted lncRNA	ASO_C0010207_06	Exiqon	GATAGGTGGATGCTAT	16
315	CATG00000083589.1	CATG00000083589.1	Targeted lncRNA	ASO_C0010207_07	Exiqon	GTTACTCTTCAGATT	15
316	CATG00000089639.1	CATG00000089639.1	Targeted lncRNA	ASO_G0223811_01	Exiqon	GTAGGAGATGGCGTAT	16
317	CATG00000089639.1	CATG00000089639.1	Targeted lncRNA	ASO_G0223811_03	Exiqon	CTTCCAGGCTCATCAT	16
318	CATG00000089639.1	CATG00000089639.1	Targeted lncRNA	ASO_G0223811_04	Exiqon	GGGATGACACGAAGTT	16
319	CATG00000089639.1	CATG00000089639.1	Targeted lncRNA	ASO_G0223811_05	Exiqon	CCGTCCTGTGAAAGAA	16
320	CATG00000089639.1	CATG00000089639.1	Targeted lncRNA	ASO_G0223811_06	Exiqon	GCTCTGCTCATCCTTA	16
321	CATG00000089639.1	CATG00000089639.1	Targeted lncRNA	ASO_G0223811_AD_02	GeneDesign	ACCCTCCCGTTAAGCAAG	18
322	CATG00000089639.1	CATG00000089639.1	Targeted lncRNA	ASO_G0223811_AD_05	GeneDesign	CCACGAGCCTACTATGAA	18
323	CATG00000089639.1	CATG00000089639.1	Targeted lncRNA	ASO_G0223811_AD_06	GeneDesign	CGCCCGTCATCTCAAGTT	18
324	CATG00000089639.1	CATG00000089639.1	Targeted lncRNA	ASO_G0223811_AD_07	GeneDesign	CGTCCACCCATACGCATG	18
325	CATG00000089639.1	CATG00000089639.1	Targeted lncRNA	ASO_G0223811_AD_10	GeneDesign	TCTTTCGAGCCAAGCGTC	18
326	CATG00000090305.1	CATG00000090305.1	Positive Control	ASO_C0011140_02	Exiqon	CTGAGGCATAGATGGT	16
327	CATG00000090305.1	CATG00000090305.1	Positive Control	ASO_C0011140_06	Exiqon	CCATCCTTGAAGCTGA	16
328	CATG00000090305.1	CATG00000090305.1	Positive Control	ASO_C0011140_07	Exiqon	GGCAAGCAAATCTTGA	16
329	CATG00000090305.1	CATG00000090305.1	Positive Control	ASO_C0011140_09	Exiqon	CGATAGGCCGCGTGCA	16
330	CATG00000090305.1	CATG00000090305.1	Positive Control	ASO_C0011140_10	Exiqon	AGTCTAACTTACCCAG	16
331	CATG00000095991.1	CATG00000095991.1	Targeted lncRNA	ASO_C0012015_01	Exiqon	TAGGAGGCCACACTCT	16
332	CATG00000095991.1	CATG00000095991.1	Targeted lncRNA	ASO_C0012015_03	Exiqon	TAGTTAGATCCCGTT	15
333	CATG00000095991.1	CATG00000095991.1	Targeted lncRNA	ASO_C0012015_07	Exiqon	CAGGTGTGATGGCGAG	16
334	CATG00000095991.1	CATG00000095991.1	Targeted lncRNA	ASO_C0012015_09	Exiqon	TTTAGAGTCCCAACA	15
335	CATG00000095991.1	CATG00000095991.1	Targeted lncRNA	ASO_C0012015_10	Exiqon	AAAGCCAAGAGGTCAA	16
336	CATG00000095991.1	CATG00000095991.1	Targeted lncRNA	ASO_C0012015_AD_02	GeneDesign	AATTGGAACGAACACTCC	18
337	CATG00000095991.1	CATG00000095991.1	Targeted lncRNA	ASO_C0012015_AD_04	GeneDesign	ACTTACAACATAAACCGC	18
338	CATG00000095991.1	CATG00000095991.1	Targeted lncRNA	ASO_C0012015_AD_05	GeneDesign	CGAAGAACATCACGCAGC	18
339	CATG00000095991.1	CATG00000095991.1	Targeted lncRNA	ASO_C0012015_AD_06	GeneDesign	CGTAGGCAGCAGGATATT	18
340	CATG00000095991.1	CATG00000095991.1	Targeted lncRNA	ASO_C0012015_AD_09	GeneDesign	GTCCTTACAGCACCGCAT	18
341	CATG00000098665.1	CATG00000098665.1	Targeted lncRNA	ASO_C0013450_01	Exiqon	GCGAGACTAGGATTTA	16
342	CATG00000098665.1	CATG00000098665.1	Targeted lncRNA	ASO_C0013450_02	Exiqon	GGATTGGTCATAAGGT	16
343	CATG00000098665.1	CATG00000098665.1	Targeted lncRNA	ASO_C0013450_03	Exiqon	GCGAACCAGAACAATC	16
344	CATG00000098665.1	CATG00000098665.1	Targeted lncRNA	ASO_C0013450_06	Exiqon	GTGAGGTGACCAAGTG	16
345	CATG00000098665.1	CATG00000098665.1	Targeted lncRNA	ASO_C0013450_07	Exiqon	GGGAACGTGGGTTAAC	16
346	CATG00000098665.1	CATG00000098665.1	Targeted lncRNA	ASO_C0013450_AD_01	GeneDesign	AAACGCCGCTGATGTGCA	18
347	CATG00000098665.1	CATG00000098665.1	Targeted lncRNA	ASO_C0013450_AD_02	GeneDesign	ATATTCGCTCCTTAGTAG	18
348	CATG00000098665.1	CATG00000098665.1	Targeted lncRNA	ASO_C0013450_AD_03	GeneDesign	ATCGACTGCACGCTGG	16
349	CATG00000098665.1	CATG00000098665.1	Targeted lncRNA	ASO_C0013450_AD_04	GeneDesign	CCGCCATCACGTACCT	16
350	CATG00000098665.1	CATG00000098665.1	Targeted lncRNA	ASO_C0013450_AD_09	GeneDesign	TTCAAGCAGAACCGAC	16
351	CATG00000098831.1	CATG00000098831.1	Targeted lncRNA	ASO_C0013510_01	Exiqon	CGTTGGCGTGTGGAAA	16
352	CATG00000098831.1	CATG00000098831.1	Targeted lncRNA	ASO_C0013510_03	Exiqon	AGATCCATTAGTGTCA	16
353	CATG00000098831.1	CATG00000098831.1	Targeted lncRNA	ASO_C0013510_06	Exiqon	GAGTGAGCAGGTGATA	16
354	CATG00000098831.1	CATG00000098831.1	Targeted lncRNA	ASO_C0013510_07	Exiqon	CAGTCAAATTCCCATT	16
355	CATG00000098831.1	CATG00000098831.1	Targeted lncRNA	ASO_C0013510_08	Exiqon	TCCATCCAAATCACAC	16
356	CATG00000098831.1	CATG00000098831.1	Targeted lncRNA	ASO_C0013510_AD_02	GeneDesign	ACCATACCTGCATCGA	16
357	CATG00000098831.1	CATG00000098831.1	Targeted lncRNA	ASO_C0013510_AD_04	GeneDesign	CGTCTAGCCCATCCCT	16
358	CATG00000098831.1	CATG00000098831.1	Targeted lncRNA	ASO_C0013510_AD_05	GeneDesign	CTGTGTTTATTGCCGA	16
359	CATG00000098831.1	CATG00000098831.1	Targeted lncRNA	ASO_C0013510_AD_08	GeneDesign	TATAGAACCGATTTAT	16
360	CATG00000098831.1	CATG00000098831.1	Targeted lncRNA	ASO_C0013510_AD_10	GeneDesign	TCGTATCCTCTTTGAA	16
361	CATG00000106837.1	CATG00000106837.1	Targeted lncRNA	ASO_C0015153_01	Exiqon	TAAGGTAGGACATTGA	16
362	CATG00000106837.1	CATG00000106837.1	Targeted lncRNA	ASO_C0015153_03	Exiqon	TTAAAGGAGCCACAGT	16
363	CATG00000106837.1	CATG00000106837.1	Targeted lncRNA	ASO_C0015153_04	Exiqon	ATTCTGGATTTACACA	16
364	CATG00000106837.1	CATG00000106837.1	Targeted lncRNA	ASO_C0015153_07	Exiqon	AGGCAATTCCAACATC	16
365	CATG00000106837.1	CATG00000106837.1	Targeted lncRNA	ASO_C0015153_08	Exiqon	GAAGGATTACACTCCA	16
366	CATG00000108369.1	CATG00000108369.1	Targeted lncRNA	ASO_C014559_01	Exiqon	GAATTCTGCCTTCATC	16
367	CATG00000108369.1	CATG00000108369.1	Targeted lncRNA	ASO_C014559_02	Exiqon	GAGGAAGAATCTAATC	16
368	CATG00000108369.1	CATG00000108369.1	Targeted lncRNA	ASO_C014559_06	Exiqon	AACGGGCAATGGGTGG	16
369	CATG00000108369.1	CATG00000108369.1	Targeted lncRNA	ASO_C014559_07	Exiqon	TGGCATCCCTGGGCTT	16
370	CATG00000108369.1	CATG00000108369.1	Targeted lncRNA	ASO_C014559_09	Exiqon	CTTCAGTTAAAGACT	15
371	CATG00000108369.1	CATG00000108369.1	Targeted lncRNA	ASO_C014559_AD_01	GeneDesign	ACTAGATGTACGGTTT	16
372	CATG00000108369.1	CATG00000108369.1	Targeted lncRNA	ASO_C014559_AD_03	GeneDesign	CGCATAGACTTTACCT	16
373	CATG00000108369.1	CATG00000108369.1	Targeted lncRNA	ASO_C014559_AD_05	GeneDesign	GATACACCACGTCACC	16
374	CATG00000108369.1	CATG00000108369.1	Targeted lncRNA	ASO_C014559_AD_06	GeneDesign	GATGTAATACCAACGG	16
375	CATG00000108369.1	CATG00000108369.1	Targeted lncRNA	ASO_C014559_AD_07	GeneDesign	TAAACCGTAGAATCCT	16
376	CATG00000117597.1	CATG00000117597.1	Positive Control	ASO_C0015779_01	Exiqon	CTAAGCGAGAGGTGCA	16
377	CATG00000117597.1	CATG00000117597.1	Positive Control	ASO_C0015779_02	Exiqon	ATGCGCCGGTAGGTAA	16
378	CATG00000117597.1	CATG00000117597.1	Positive Control	ASO_C0015779_06	Exiqon	ACAATTCCAAGGTGGT	16
379	CATG00000117597.1	CATG00000117597.1	Positive Control	ASO_C0015779_07	Exiqon	CGAAGGCAGGCAAATA	16
380	CATG00000117597.1	CATG00000117597.1	Positive Control	ASO_C0015779_08	Exiqon	CCACGACCTTCTTTAA	16
381	CATGC0000023317	CATGC0000023317	Targeted lncRNA	ASO_C023317_01	Exiqon	CGTGTCCGCAGCGATG	16
382	CATGC0000023317	CATGC0000023317	Targeted lncRNA	ASO_C023317_02	Exiqon	CATTACTCCATCCTTT	16
383	CATGC0000023317	CATGC0000023317	Targeted lncRNA	ASO_C023317_03	Exiqon	ACTCAATAGGGTGATT	16
384	CATGC0000023317	CATGC0000023317	Targeted lncRNA	ASO_C023317_04	Exiqon	CTTGCGCCTGGAACGT	16
385	CATGC0000023317	CATGC0000023317	Targeted lncRNA	ASO_C023317_07	Exiqon	GCCAGGAAACCAAAAC	16
386	CATGE0000171943	CATGE0000171943	Targeted lncRNA	ASO_G0236933_03	Exiqon	CCGCTTCCCACTCAGA	16
387	CATGE0000171943	CATGE0000171943	Targeted lncRNA	ASO_G0236933_05	Exiqon	TACCTCCAAGACCGCT	16
388	CATGE0000171943	CATGE0000171943	Targeted lncRNA	ASO_G0236933_06	Exiqon	CAGATCGGTGCCCCAG	16
389	CATGE0000171943	CATGE0000171943	Targeted lncRNA	ASO_G0236933_07	Exiqon	GACGGTGGGCGCTGAG	16
390	CATGE0000171943	CATGE0000171943	Targeted lncRNA	ASO_G0236933_08	Exiqon	AGTCCCTGGAGGAGCC	16
391	CD27-AS1	CD27-AS1	Targeted lncRNA	ASO_G0215039_01	Exiqon	GAGTGAGAACACATTG	16
392	CD27-AS1	CD27-AS1	Targeted lncRNA	ASO_G0215039_03	Exiqon	CAGCAGCTTCTTTAAC	16
393	CD27-AS1	CD27-AS1	Targeted lncRNA	ASO_G0215039_05	Exiqon	TTCATTAGCAGGTCAC	16
394	CD27-AS1	CD27-AS1	Targeted lncRNA	ASO_G0215039_06	Exiqon	TGTCATCACTCCTCT	15
395	CD27-AS1	CD27-AS1	Targeted lncRNA	ASO_G0215039_08	Exiqon	ACCAAATTCTAGTAGC	16
396	CD27-AS1	CD27-AS1	Targeted lncRNA	ASO_G0215039_AD_01	GeneDesign	ATCGGACCTCTACACTTG	18
397	CD27-AS1	CD27-AS1	Targeted lncRNA	ASO_G0215039_AD_05	GeneDesign	CGGGTGGGATAGAATA	16
398	CD27-AS1	CD27-AS1	Targeted lncRNA	ASO_G0215039_AD_07	GeneDesign	CTTCTCGTTCGCAACT	16
399	CD27-AS1	CD27-AS1	Targeted lncRNA	ASO_G0215039_AD_08	GeneDesign	GCCAAGACTCATCGGATC	18
400	CD27-AS1	CD27-AS1	Targeted lncRNA	ASO_G0215039_AD_09	GeneDesign	GCCGACCATCCAAGGG	16
401	CD99P1	CD99P1	Targeted lncRNA	ASO_G0223773_01	Exiqon	AAAGGCATCGCTAAGT	16
402	CD99P1	CD99P1	Targeted lncRNA	ASO_G0223773_05	Exiqon	CCGTAGGGTTAGAGGC	16
403	CD99P1	CD99P1	Targeted lncRNA	ASO_G0223773_06	Exiqon	GAAACCAGGTCGGTTG	16
404	CD99P1	CD99P1	Targeted lncRNA	ASO_G0223773_07	Exiqon	AGCTTGGGTGAATTAA	16
405	CD99P1	CD99P1	Targeted lncRNA	ASO_G0223773_10	Exiqon	GGCATCTGCTAAGTCA	16
406	CDKN2B-AS1	CDKN2B-AS1	Positive Control	ASO_G0240498_POS_01	Exiqon	CGTAAAAGTCAATTCTT	17
407	CDKN2B-AS1	CDKN2B-AS1	Positive Control	ASO_G0240498_POS_02	Exiqon	TCTTGTCGTGTTAGTTAT	18
408	CDKN2B-AS1	CDKN2B-AS1	Positive Control	ASO_G0240498_POS_03	Exiqon	GACCCTAAGCCCTAAAG	17
409	CDKN2B-AS1	CDKN2B-AS1	Positive Control	ASO_G0240498_POS_04	Exiqon	CGGGTACAAAAAGATGC	17
410	CDKN2B-AS1	CDKN2B-AS1	Positive Control	ASO_G0240498_POS_05	Exiqon	ATGACTCTACCGAAACC	17
411	CDKN2C	CDKN2C	Positive Control	ASO_C0000830_02	Exiqon	ATTGAGCTAGGTTGGA	16
412	CDKN2C	CDKN2C	Positive Control	ASO_C0000830_04	Exiqon	TTGAATCTGTCCTGCA	16
413	CDKN2C	CDKN2C	Positive Control	ASO_C0000830_05	Exiqon	TGTCAAATGCTCTTCT	16
414	CDKN2C	CDKN2C	Positive Control	ASO_C0000830_07	Exiqon	AGTCAGTTGGAAATCT	16
415	CDKN2C	CDKN2C	Positive Control	ASO_C0000830_08	Exiqon	AAAGCCTCGTGAGTCC	16
416	CKMT2-AS1	CKMT2-AS1	Targeted lncRNA	ASO_G0247572_01	Exiqon	TTAATGCGGAGGGCAG	16
417	CKMT2-AS1	CKMT2-AS1	Targeted lncRNA	ASO_G0247572_03	Exiqon	ACATTGAGCACTAGAG	16
418	CKMT2-AS1	CKMT2-AS1	Targeted lncRNA	ASO_G0247572_07	Exiqon	GATTGAACTCTTCATC	16
419	CKMT2-AS1	CKMT2-AS1	Targeted lncRNA	ASO_G0247572_08	Exiqon	GCGTCTGGGTTACTTC	16
420	CKMT2-AS1	CKMT2-AS1	Targeted lncRNA	ASO_G0247572_09	Exiqon	GCCTAGATGCTGTAAG	16
421	CLDN22	CLDN22	Positive Control	ASO_C0008202_01	Exiqon	GAGCTTGAAGTGTAAC	16
422	CLDN22	CLDN22	Positive Control	ASO_C0008202_02	Exiqon	AGATTGGAGTGGCATG	16
423	CLDN22	CLDN22	Positive Control	ASO_C0008202_04	Exiqon	TGTGACAAGCGTGAGG	16
424	CLDN22	CLDN22	Positive Control	ASO_C0008202_05	Exiqon	GAACGGACAACACAGG	16
425	CLDN22	CLDN22	Positive Control	ASO_C0008202_09	Exiqon	GAAGACTTGGCTCTGA	16
426	COX10-AS1	COX10-AS1	Targeted lncRNA	ASO_G0236088_02	Exiqon	CTCCAGACACCACGC	15
427	COX10-AS1	COX10-AS1	Targeted lncRNA	ASO_G0236088_03	Exiqon	CACACTCCAGCCAGT	15
428	COX10-AS1	COX10-AS1	Targeted lncRNA	ASO_G0236088_07	Exiqon	CGGAGGCACACCGTG	15
429	COX10-AS1	COX10-AS1	Targeted lncRNA	ASO_G0236088_08	Exiqon	TTCTTCAGGACAGCG	15
430	COX10-AS1	COX10-AS1	Targeted lncRNA	ASO_G0236088_10	Exiqon	GAGGATGCCTGTCAAC	16
431	MIATNB	CTA-211A9.5	Targeted lncRNA	ASO_G0244625_02	Exiqon	ATCGTATGCTTTTAAC	16
432	MIATNB	CTA-211A9.5	Targeted lncRNA	ASO_G0244625_04	Exiqon	ACGTGGTCAGTGTAAC	16
433	MIATNB	CTA-211A9.5	Targeted lncRNA	ASO_G0244625_06	Exiqon	TCATCAGACAGTGATC	16
434	MIATNB	CTA-211A9.5	Targeted lncRNA	ASO_G0244625_08	Exiqon	CTAGCAAGATTCAACC	16
435	MIATNB	CTA-211A9.5	Targeted lncRNA	ASO_G0244625_09	Exiqon	TGCAAATTCACCTTGG	16
436	MIATNB	CTA-211A9.5	Targeted lncRNA	ASO_G0244625_AD_05	GeneDesign	CCGATGAGCACTATACTT	18
437	MIATNB	CTA-211A9.5	Targeted lncRNA	ASO_G0244625_AD_07	GeneDesign	CTAGACTCCGATAGCACA	18
438	MIATNB	CTA-211A9.5	Targeted lncRNA	ASO_G0244625_AD_08	GeneDesign	GCGGTAAGATGACAGGAC	18
439	MIATNB	CTA-211A9.5	Targeted lncRNA	ASO_G0244625_AD_09	GeneDesign	GTGTGGAACGGTAGAGTC	18
440	MIATNB	CTA-211A9.5	Targeted lncRNA	ASO_G0244625_AD_10	GeneDesign	TACCACGCCTTGAACACT	18
441	NUP50-DT	CTA-217C2.1	Targeted lncRNA	ASO_G0226328_02	Exiqon	TCGCCCCATGGTCAAA	16
442	NUP50-DT	CTA-217C2.1	Targeted lncRNA	ASO_G0226328_03	Exiqon	ACAAGGCCGCACTAGC	16
443	NUP50-DT	CTA-217C2.1	Targeted lncRNA	ASO_G0226328_04	Exiqon	TGGAAGACGCGTTGCC	16
444	NUP50-DT	CTA-217C2.1	Targeted lncRNA	ASO_G0226328_07	Exiqon	GCAGAGTAGAAATTAC	16
445	NUP50-DT	CTA-217C2.1	Targeted lncRNA	ASO_G0226328_10	Exiqon	ACTAGCGCGCGAACAT	16
446	CTB-31O20.2	CTB-31O20.2	Targeted lncRNA	ASO_G0261526_01	Exiqon	AGAGCGGCCGGAAAGG	16
447	CTB-31O20.2	CTB-31O20.2	Targeted lncRNA	ASO_G0261526_02	Exiqon	ATAAAGTCTGGTGCTA	16
448	CTB-31O20.2	CTB-31O20.2	Targeted lncRNA	ASO_G0261526_03	Exiqon	CTTGGAGGTTAGGACT	16
449	CTB-31O20.2	CTB-31O20.2	Targeted lncRNA	ASO_G0261526_06	Exiqon	GGAATCCCACCTGTAT	16
450	CTB-31O20.2	CTB-31O20.2	Targeted lncRNA	ASO_G0261526_08	Exiqon	GAGCCCCAAGTAAAGT	16
451	CTB-55O6.12	CTB-55O6.12	Targeted lncRNA	ASO_G0267169_03	Exiqon	TCACCACCTTCAACGC	16
452	CTB-55O6.12	CTB-55O6.12	Targeted lncRNA	ASO_G0267169_04	Exiqon	CGCCTTACAGAAGAAG	16
453	CTB-55O6.12	CTB-55O6.12	Targeted lncRNA	ASO_G0267169_05	Exiqon	TACCCAGGAGAAGGCG	16
454	CTB-55O6.12	CTB-55O6.12	Targeted lncRNA	ASO_G0267169_07	Exiqon	GTTGACAGACGCTGAG	16
455	CTB-55O6.12	CTB-55O6.12	Targeted lncRNA	ASO_G0267169_10	Exiqon	TCAACAAGGAGTCGGT	16
456	LINC01184	CTC-228N24.3	Targeted lncRNA	ASO_G0245937_01	Exiqon	GTTAGTGGACTCAATG	16
457	LINC01184	CTC-228N24.3	Targeted lncRNA	ASO_G0245937_02	Exiqon	TGATAATTGCGTGGAT	16
458	LINC01184	CTC-228N24.3	Targeted lncRNA	ASO_G0245937_04	Exiqon	GGTGATTGACTATGGC	16
459	LINC01184	CTC-228N24.3	Targeted lncRNA	ASO_G0245937_05	Exiqon	ATAAGTGATTAGTGTC	16
460	LINC01184	CTC-228N24.3	Targeted lncRNA	ASO_G0245937_07	Exiqon	AGTAGGACAGAGTTAC	16
461	LINC01184	CTC-228N24.3	Targeted lncRNA	ASO_G0245937_AD_02	GeneDesign	CAGTTAGTTAGGAAACGC	18
462	LINC01184	CTC-228N24.3	Targeted lncRNA	ASO_G0245937_AD_03	GeneDesign	CATCCATAGCGAGTCC	16
463	LINC01184	CTC-228N24.3	Targeted lncRNA	ASO_G0245937_AD_05	GeneDesign	GCTATATCCCGTAAATAC	18
464	LINC01184	CTC-228N24.3	Targeted lncRNA	ASO_G0245937_AD_07	GeneDesign	TCAGGAACCGCAATAGTA	18
465	LINC01184	CTC-228N24.3	Targeted lncRNA	ASO_G0245937_AD_09	GeneDesign	TTAATGCCACGCCCATAT	18
466	TMEM220-AS1	CTC-297N7.5	Targeted lncRNA	ASO_G0263400_03	Exiqon	CGGCCTTGGTGCAGGT	16
467	TMEM220-AS1	CTC-297N7.5	Targeted lncRNA	ASO_G0263400_04	Exiqon	GTGACCGGCTCTAGAA	16
468	TMEM220-AS1	CTC-297N7.5	Targeted lncRNA	ASO_G0263400_06	Exiqon	AGATTCAAGCTGGCGT	16
469	TMEM220-AS1	CTC-297N7.5	Targeted lncRNA	ASO_G0263400_09	Exiqon	AGTCTAACCACTGAGG	16
470	TMEM220-AS1	CTC-297N7.5	Targeted lncRNA	ASO_G0263400_10	Exiqon	GAGCAAGGCTTTTAC	15
471	CTC-338M12.4	CTC-338M12.4	Targeted lncRNA	ASO_G0233937_01	Exiqon	TTGACTCTGCAAGCTT	16
472	CTC-338M12.4	CTC-338M12.4	Targeted lncRNA	ASO_G0233937_02	Exiqon	GCAGGCACAGGTAGAC	16
473	CTC-338M12.4	CTC-338M12.4	Targeted lncRNA	ASO_G0233937_04	Exiqon	CAGAAGAACGGTGGAC	16
474	CTC-338M12.4	CTC-338M12.4	Targeted lncRNA	ASO_G0233937_05	Exiqon	AGTGAAAGAGAACCGG	16
475	CTC-338M12.4	CTC-338M12.4	Targeted lncRNA	ASO_G0233937_10	Exiqon	AGGAAAACTCCAAAGG	16
476	CTC-338M12.4	CTC-338M12.4	Targeted lncRNA	ASO_G0233937_AD_03	GeneDesign	CAAGAGTATGGGACACGC	18
477	CTC-338M12.4	CTC-338M12.4	Targeted lncRNA	ASO_G0233937_AD_05	GeneDesign	CGCACTCTGGTTTATATG	18
478	CTC-338M12.4	CTC-338M12.4	Targeted lncRNA	ASO_G0233937_AD_08	GeneDesign	TCTAAACATTACCGCTGC	18
479	CTC-338M12.4	CTC-338M12.4	Targeted lncRNA	ASO_G0233937_AD_09	GeneDesign	TCTGCACCTACGCTGATC	18
480	CTC-338M12.4	CTC-338M12.4	Targeted lncRNA	ASO_G0233937_AD_10	GeneDesign	TTAATTTCACAGCCGACC	18
481	CTC-338M12.5	CTC-338M12.5	Targeted lncRNA	ASO_G0250222_01	Exiqon	AACGTGCTCCCCAATC	16
482	CTC-338M12.5	CTC-338M12.5	Targeted lncRNA	ASO_G0250222_02	Exiqon	ACAGCACCAGACAATC	16
483	CTC-338M12.5	CTC-338M12.5	Targeted lncRNA	ASO_G0250222_03	Exiqon	GAGCAAAGCTTCTGGA	16
484	CTC-338M12.5	CTC-338M12.5	Targeted lncRNA	ASO_G0250222_06	Exiqon	GAGGACAGGGTCATTT	16
485	CTC-338M12.5	CTC-338M12.5	Targeted lncRNA	ASO_G0250222_07	Exiqon	CTTCCTCACGCACAGC	16
486	CTC-338M12.5	CTC-338M12.5	Targeted lncRNA	ASO_G0250222_AD_02	GeneDesign	ACTCGGACCTAATTCT	16
487	CTC-338M12.5	CTC-338M12.5	Targeted lncRNA	ASO_G0250222_AD_05	GeneDesign	CCGCCCTAACCTCTCG	16
488	CTC-338M12.5	CTC-338M12.5	Targeted lncRNA	ASO_G0250222_AD_06	GeneDesign	CGTGTGTCTATCAGAG	16
489	CTC-338M12.5	CTC-338M12.5	Targeted lncRNA	ASO_G0250222_AD_07	GeneDesign	GAGCGTAAGTGTGATC	16
490	CTC-338M12.5	CTC-338M12.5	Targeted lncRNA	ASO_G0250222_AD_10	GeneDesign	TCCAAATGTGAGACGG	16
491	CTC-459F4.3	CTC-459F4.3	Targeted lncRNA	ASO_G0267575_01	Exiqon	CTTAGCCTGGTGGCAG	16
492	CTC-459F4.3	CTC-459F4.3	Targeted lncRNA	ASO_G0267575_02	Exiqon	GCCTCACACTTAAGCA	16
493	CTC-459F4.3	CTC-459F4.3	Targeted lncRNA	ASO_G0267575_03	Exiqon	AACGGGCGTCCTCTAG	16
494	CTC-459F4.3	CTC-459F4.3	Targeted lncRNA	ASO_G0267575_04	Exiqon	AGAGCTGTAGCAGTAG	16
495	CTC-459F4.3	CTC-459F4.3	Targeted lncRNA	ASO_G0267575_05	Exiqon	GTAGAGAGGCTCCTTG	16
496	ZNF56	CTC-559E9.6	Targeted lncRNA	ASO_G0267419_02	Exiqon	AACGTCTGCATTAGGT	16
497	ZNF56	CTC-559E9.6	Targeted lncRNA	ASO_G0267419_03	Exiqon	GTGAAACTCTGGGCGT	16
498	ZNF56	CTC-559E9.6	Targeted lncRNA	ASO_G0267419_04	Exiqon	TCATGCCGGAAGCTGA	16
499	ZNF56	CTC-559E9.6	Targeted lncRNA	ASO_G0267419_05	Exiqon	AGGTAGGAGAGGTTAA	16
500	ZNF56	CTC-559E9.6	Targeted lncRNA	ASO_G0267419_08	Exiqon	GAACAGCTCTGAAGGC	16
501	ZNF56	CTC-559E9.6	Targeted lncRNA	ASO_G0267419_AD_03	GeneDesign	CCCGAAAGGTCGCATG	16
502	ZNF56	CTC-559E9.6	Targeted lncRNA	ASO_G0267419_AD_04	GeneDesign	CGAGCTAATGTGTGGTGA	18
503	ZNF56	CTC-559E9.6	Targeted lncRNA	ASO_G0267419_AD_05	GeneDesign	CGCCCAATCGTTTCAT	16
504	ZNF56	CTC-559E9.6	Targeted lncRNA	ASO_G0267419_AD_06	GeneDesign	GCATAACGTGATTTGGTG	18
505	ZNF56	CTC-559E9.6	Targeted lncRNA	ASO_G0267419_AD_08	GeneDesign	GTTAAGACTATTCTGCGT	18
506	ZNF433-AS1	CTD-2006C1.2	Targeted lncRNA	ASO_G0219665_01	Exiqon	CACGGCGCAGGCAATA	16
507	ZNF433-AS1	CTD-2006C1.2	Targeted lncRNA	ASO_G0219665_02	Exiqon	GTAGTGATCTTCAAT	15
508	ZNF433-AS1	CTD-2006C1.2	Targeted lncRNA	ASO_G0219665_06	Exiqon	TCAGAGCAGGAAAGAA	16
509	ZNF433-AS1	CTD-2006C1.2	Targeted lncRNA	ASO_G0219665_07	Exiqon	ACTGGTCCAACACTCT	16
510	ZNF433-AS1	CTD-2006C1.2	Targeted lncRNA	ASO_G0219665_08	Exiqon	GCAGAACTCCCGTGAG	16
511	ZNF433-AS1	CTD-2006C1.2	Targeted lncRNA	ASO_G0219665_AD_02	GeneDesign	CAAGTCCCGCCTTTCG	16
512	ZNF433-AS1	CTD-2006C1.2	Targeted lncRNA	ASO_G0219665_AD_03	GeneDesign	CGACTTCCGCACAATTTG	18
513	ZNF433-AS1	CTD-2006C1.2	Targeted lncRNA	ASO_G0219665_AD_04	GeneDesign	CGGGAAGATCGGAGTAGC	18
514	ZNF433-AS1	CTD-2006C1.2	Targeted lncRNA	ASO_G0219665_AD_05	GeneDesign	CTTCCCAACACGTCGG	16
515	ZNF433-AS1	CTD-2006C1.2	Targeted lncRNA	ASO_G0219665_AD_08	GeneDesign	GTTGATGTTGGAAACGCG	18
516	CTD-2015H6.3	CTD-2015H6.3	Targeted lncRNA	ASO_G0249042_01	Exiqon	ACCATGGAGCAACATT	16
517	CTD-2015H6.3	CTD-2015H6.3	Targeted lncRNA	ASO_G0249042_02	Exiqon	TCATCCATCCCTTAA	15
518	CTD-2015H6.3	CTD-2015H6.3	Targeted lncRNA	ASO_G0249042_03	Exiqon	TGTAGTAGAGACGAGT	16
519	CTD-2015H6.3	CTD-2015H6.3	Targeted lncRNA	ASO_G0249042_08	Exiqon	GTATGCCCTAACGCAG	16
520	CTD-2015H6.3	CTD-2015H6.3	Targeted lncRNA	ASO_G0249042_09	Exiqon	CAAAACTGTCAACACA	16
521	SCAMP1-AS1	CTD-2037K23.2	Targeted lncRNA	ASO_G0245556_01	Exiqon	GTAGCTTCATCTAAGT	16
522	SCAMP1-AS1	CTD-2037K23.2	Targeted lncRNA	ASO_G0245556_03	Exiqon	TACACTGAGCACTAAG	16
523	SCAMP1-AS1	CTD-2037K23.2	Targeted lncRNA	ASO_G0245556_04	Exiqon	AACAGACTGCTTGCTC	16
524	SCAMP1-AS1	CTD-2037K23.2	Targeted lncRNA	ASO_G0245556_05	Exiqon	TTACAGACTCAGAGAG	16
525	SCAMP1-AS1	CTD-2037K23.2	Targeted lncRNA	ASO_G0245556_07	Exiqon	GAAGAGAGTAGCACAG	16
526	LINC02104	CTD-2078B5.2	Targeted lncRNA	ASO_G0271334_02	Exiqon	TCTAGTCTTCACGCTG	16
527	LINC02104	CTD-2078B5.2	Targeted lncRNA	ASO_G0271334_05	Exiqon	TGAGGAGCTTGGGTAT	16
528	LINC02104	CTD-2078B5.2	Targeted lncRNA	ASO_G0271334_07	Exiqon	CGAGGGATCCCCTTCC	16
529	LINC02104	CTD-2078B5.2	Targeted lncRNA	ASO_G0271334_08	Exiqon	CTTCCCAGTCATCCGA	16
530	LINC02104	CTD-2078B5.2	Targeted lncRNA	ASO_G0271334_10	Exiqon	TCAAAGTGTCACTGCA	16
531	ZNF790-AS1	CTD-2162K18.5	Targeted lncRNA	ASO_G0267254_02	Exiqon	GAATCACACTCGCCAC	16
532	ZNF790-AS1	CTD-2162K18.5	Targeted lncRNA	ASO_G0267254_04	Exiqon	TGAAAGCGAGGACTCC	16
533	ZNF790-AS1	CTD-2162K18.5	Targeted lncRNA	ASO_G0267254_05	Exiqon	CGAGTGCGGTGGACC	15
534	ZNF790-AS1	CTD-2162K18.5	Targeted lncRNA	ASO_G0267254_06	Exiqon	CGTAGCGATGGCCGAT	16
535	ZNF790-AS1	CTD-2162K18.5	Targeted lncRNA	ASO_G0267254_07	Exiqon	TGTCAGCACCAATGCG	16
536	ZNF790-AS1	CTD-2162K18.5	Targeted lncRNA	ASO_G0267254_AD_01	GeneDesign	ACCGTCCCTACAGCTC	16
537	ZNF790-AS1	CTD-2162K18.5	Targeted lncRNA	ASO_G0267254_AD_02	GeneDesign	ACTCTACATACGTGCTCC	18
538	ZNF790-AS1	CTD-2162K18.5	Targeted lncRNA	ASO_G0267254_AD_03	GeneDesign	ATAAACCTCAACCTGCCG	18
539	ZNF790-AS1	CTD-2162K18.5	Targeted lncRNA	ASO_G0267254_AD_07	GeneDesign	CGTTGAGTCTTCCGTGCT	18
540	ZNF790-AS1	CTD-2162K18.5	Targeted lncRNA	ASO_G0267254_AD_09	GeneDesign	TACACGAGCCCTTCTC	16
541	WFDC21P	CTD-2319I12.1	Targeted lncRNA	ASO_G0261040_01	Exiqon	AAGAAACAACCCCTCT	16
542	WFDC21P	CTD-2319I12.1	Targeted lncRNA	ASO_G0261040_05	Exiqon	TACCTCTAGGCTGAAG	16
543	WFDC21P	CTD-2319I12.1	Targeted lncRNA	ASO_G0261040_06	Exiqon	CTTACCCTGCAACACA	16
544	WFDC21P	CTD-2319I12.1	Targeted lncRNA	ASO_G0261040_08	Exiqon	ATCCACAGGCTTGCTG	16
545	WFDC21P	CTD-2319I12.1	Targeted lncRNA	ASO_G0261040_10	Exiqon	GTCAAGGAACTCCAGA	16
546	CTD-2319I12.4	CTD-2319I12.4	Targeted lncRNA	ASO_G0267248_01	Exiqon	GAAGAGCTGCAATCGT	16
547	CTD-2319I12.4	CTD-2319I12.4	Targeted lncRNA	ASO_G0267248_02	Exiqon	GCTAAGTCACGTGATC	16
548	CTD-2319I12.4	CTD-2319I12.4	Targeted lncRNA	ASO_G0267248_05	Exiqon	TTCACACCAGCAGGAG	16
549	CTD-2319I12.4	CTD-2319I12.4	Targeted lncRNA	ASO_G0267248_07	Exiqon	TCAAAGGCTTTAACTT	16
550	CTD-2319I12.4	CTD-2319I12.4	Targeted lncRNA	ASO_G0267248_08	Exiqon	ATAACTGTCCAATTTA	16
551	CTD-2319I12.4	CTD-2319I12.4	Targeted lncRNA	ASO_G0267248_AD_02	GeneDesign	ATCAATGCCTCCCGTG	16
552	CTD-2319I12.4	CTD-2319I12.4	Targeted lncRNA	ASO_G0267248_AD_03	GeneDesign	CGCTGTATAAAGGGTCTG	18
553	CTD-2319I12.4	CTD-2319I12.4	Targeted lncRNA	ASO_G0267248_AD_05	GeneDesign	GATCTCTCGATTCTTGCC	18
554	CTD-2319I12.4	CTD-2319I12.4	Targeted lncRNA	ASO_G0267248_AD_07	GeneDesign	TCGGCTAAAGTGAGTGAC	18
555	CTD-2319I12.4	CTD-2319I12.4	Targeted lncRNA	ASO_G0267248_AD_08	GeneDesign	TCTCAAGAAGCCGTAACC	18
556	CTD-2336O2.1	CTD-2336O2.1	Targeted lncRNA	ASO_G0253982_01	Exiqon	AGAGCGTTGGTAATTT	16
557	CTD-2336O2.1	CTD-2336O2.1	Targeted lncRNA	ASO_G0253982_02	Exiqon	ATGCGCTCGGTCAAGA	16
558	CTD-2336O2.1	CTD-2336O2.1	Targeted lncRNA	ASO_G0253982_05	Exiqon	AGACAAAAACTCAGGT	16
559	CTD-2336O2.1	CTD-2336O2.1	Targeted lncRNA	ASO_G0253982_06	Exiqon	GCAAACTGCGGAAACT	16
560	CTD-2336O2.1	CTD-2336O2.1	Targeted lncRNA	ASO_G0253982_08	Exiqon	ATCGATCGCATGCTAT	16
561	CTD-2336O2.1	CTD-2336O2.1	Targeted lncRNA	ASO_G0253982_AD_01	GeneDesign	AACGTCCTATTTAATCCC	18
562	CTD-2336O2.1	CTD-2336O2.1	Targeted lncRNA	ASO_G0253982_AD_04	GeneDesign	CCGACTATACCCTCAG	16
563	CTD-2336O2.1	CTD-2336O2.1	Targeted lncRNA	ASO_G0253982_AD_06	GeneDesign	CGATTCTAAAGAGGGA	16
564	CTD-2336O2.1	CTD-2336O2.1	Targeted lncRNA	ASO_G0253982_AD_08	GeneDesign	CTCGAATAACAACCTT	16
565	CTD-2336O2.1	CTD-2336O2.1	Targeted lncRNA	ASO_G0253982_AD_10	GeneDesign	GCTATCGGTTCTTTCA	16
566	CTD-2366F13.1	CTD-2366F13.1	Targeted lncRNA	ASO_G0247796_02	Exiqon	TGGACGTGAGGGACTA	16
567	CTD-2366F13.1	CTD-2366F13.1	Targeted lncRNA	ASO_G0247796_04	Exiqon	CAGTAGCGCCGAAGTG	16
568	CTD-2366F13.1	CTD-2366F13.1	Targeted lncRNA	ASO_G0247796_05	Exiqon	GCATGGTAAGCCATTT	16
569	CTD-2366F13.1	CTD-2366F13.1	Targeted lncRNA	ASO_G0247796_07	Exiqon	GCATAGAAAGGTGCTT	16
570	CTD-2366F13.1	CTD-2366F13.1	Targeted lncRNA	ASO_G0247796_10	Exiqon	TAAGCAACCCTAAGAT	16
571	CTD-2532K18.2	CTD-2532K18.2	Targeted lncRNA	ASO_G0251144_01	Exiqon	GGACGGCATCACTCCA	16
572	CTD-2532K18.2	CTD-2532K18.2	Targeted lncRNA	ASO_G0251144_04	Exiqon	TCAACACATGGCCTTC	16
573	CTD-2532K18.2	CTD-2532K18.2	Targeted lncRNA	ASO_G0251144_05	Exiqon	GAAGCCAGAAGTGCAA	16
574	CTD-2532K18.2	CTD-2532K18.2	Targeted lncRNA	ASO_G0251144_06	Exiqon	ACATTTACATCCAGAC	16
575	CTD-2532K18.2	CTD-2532K18.2	Targeted lncRNA	ASO_G0251144_07	Exiqon	ACCCAGATCATTCGGT	16
576	CTD-2587H24.5	CTD-2587H24.5	Targeted lncRNA	ASO_G0267577_01	Exiqon	AGGAGGCTTCGTGGTG	16
577	CTD-2587H24.5	CTD-2587H24.5	Targeted lncRNA	ASO_G0267577_03	Exiqon	TAGGACAGATCTGCGG	16
578	CTD-2587H24.5	CTD-2587H24.5	Targeted lncRNA	ASO_G0267577_07	Exiqon	TGTCATGAAGGTGATG	16
579	CTD-2587H24.5	CTD-2587H24.5	Targeted lncRNA	ASO_G0267577_08	Exiqon	ACATTCTAGTCCAAGT	16
580	CTD-2587H24.5	CTD-2587H24.5	Targeted lncRNA	ASO_G0267577_10	Exiqon	TAATAATTCCTGCCAC	16
581	CTD-2651B20.3	CTD-2651B20.3	Targeted lncRNA	ASO_G0259520_01	Exiqon	ATTACAACAGGTAGGT	16
582	CTD-2651B20.3	CTD-2651B20.3	Targeted lncRNA	ASO_G0259520_02	Exiqon	CGCCACCTCTGCATAA	16
583	CTD-2651B20.3	CTD-2651B20.3	Targeted lncRNA	ASO_G0259520_04	Exiqon	TCCTCGATAAACGCGA	16
584	CTD-2651B20.3	CTD-2651B20.3	Targeted lncRNA	ASO_G0259520_06	Exiqon	TAATGAGGAGTAAGAC	16
585	CTD-2651B20.3	CTD-2651B20.3	Targeted lncRNA	ASO_G0259520_07	Exiqon	CTAGTCCAGTGGTGGG	16
586	CTD-2651B20.3	CTD-2651B20.3	Targeted lncRNA	ASO_G0259520_AD_03	GeneDesign	GATTACTGTCCGATTATG	18
587	CTD-2651B20.3	CTD-2651B20.3	Targeted lncRNA	ASO_G0259520_AD_04	GeneDesign	GCTCGCTCCAAGTCTAAT	18
588	CTD-2651B20.3	CTD-2651B20.3	Targeted lncRNA	ASO_G0259520_AD_05	GeneDesign	GCTGTATCCCAATAACGA	18
589	CTD-2651B20.3	CTD-2651B20.3	Targeted lncRNA	ASO_G0259520_AD_08	GeneDesign	TCGCCTGTAACGTAAA	16
590	CTD-2651B20.3	CTD-2651B20.3	Targeted lncRNA	ASO_G0259520_AD_09	GeneDesign	TCTTGCTCATCGCTAACG	18
591	ZNF528-AS1	CTD-3018O17.3	Targeted lncRNA	ASO_G0269834_01	Exiqon	TCATGGGAGCTGCAAT	16
592	ZNF528-AS1	CTD-3018O17.3	Targeted lncRNA	ASO_G0269834_02	Exiqon	ACTAGGCTCAAGAGGA	16
593	ZNF528-AS1	CTD-3018O17.3	Targeted lncRNA	ASO_G0269834_04	Exiqon	GGCAACATCATTGAGG	16
594	ZNF528-AS1	CTD-3018O17.3	Targeted lncRNA	ASO_G0269834_05	Exiqon	CGAGCACTTTGGTAG	15
595	ZNF528-AS1	CTD-3018O17.3	Targeted lncRNA	ASO_G0269834_09	Exiqon	CACTTACATCCTTTGA	16
596	ZNF528-AS1	CTD-3018O17.3	Targeted lncRNA	ASO_G0269834_AD_01	GeneDesign	AAGTAATACCTCGACTGG	18
597	ZNF528-AS1	CTD-3018O17.3	Targeted lncRNA	ASO_G0269834_AD_02	GeneDesign	AGGCGAGTAGTGAGTAGT	18
598	ZNF528-AS1	CTD-3018O17.3	Targeted lncRNA	ASO_G0269834_AD_05	GeneDesign	CGCAAGGTTGATTCCC	16
599	ZNF528-AS1	CTD-3018O17.3	Targeted lncRNA	ASO_G0269834_AD_06	GeneDesign	CGCAGGTAAGATCCGT	16
600	ZNF528-AS1	CTD-3018O17.3	Targeted lncRNA	ASO_G0269834_AD_08	GeneDesign	GACCGCAGTATTTCAG	16
601	CTD-3074O7.5	CTD-3074O7.5	Targeted lncRNA	ASO_G0255517_01	Exiqon	TGCAAGAGTGCTGTCG	16
602	CTD-3074O7.5	CTD-3074O7.5	Targeted lncRNA	ASO_G0255517_02	Exiqon	GAAAGCGGGATCGGGA	16
603	CTD-3074O7.5	CTD-3074O7.5	Targeted lncRNA	ASO_G0255517_05	Exiqon	AGGTGATGCGCTCGTC	16
604	CTD-3074O7.5	CTD-3074O7.5	Targeted lncRNA	ASO_G0255517_07	Exiqon	TTGAGATGCCAGAAGG	16
605	CTD-3074O7.5	CTD-3074O7.5	Targeted lncRNA	ASO_G0255517_09	Exiqon	ATCTTCACAAGAACCA	16
606	CTD-3131K8.2	CTD-3131K8.2	Targeted lncRNA	ASO_G0269439_02	Exiqon	CCGAACTCACTTCGAC	16
607	CTD-3131K8.2	CTD-3131K8.2	Targeted lncRNA	ASO_G0269439_05	Exiqon	ACATCATCGGCGTGGG	16
608	CTD-3131K8.2	CTD-3131K8.2	Targeted lncRNA	ASO_G0269439_07	Exiqon	CTTCGACTCAGGCACA	16
609	CTD-3131K8.2	CTD-3131K8.2	Targeted lncRNA	ASO_G0269439_08	Exiqon	AACATCATCGGCGTG	15
610	CTD-3131K8.2	CTD-3131K8.2	Targeted lncRNA	ASO_G0269439_09	Exiqon	AGGTTGAGCATTCGGG	16
611	CTD-3131K8.2	CTD-3131K8.2	Targeted lncRNA	ASO_G0269439_AD_01	GeneDesign	AGTATTCCTCCCAATCGC	18
612	CTD-3131K8.2	CTD-3131K8.2	Targeted lncRNA	ASO_G0269439_AD_02	GeneDesign	ATACAGGCGGGAGGTACA	18
613	CTD-3131K8.2	CTD-3131K8.2	Targeted lncRNA	ASO_G0269439_AD_03	GeneDesign	ATACGCCCTCCTTCAGAA	18
614	CTD-3131K8.2	CTD-3131K8.2	Targeted lncRNA	ASO_G0269439_AD_04	GeneDesign	ATAGGCAACGTAGAGTAG	18
615	CTD-3131K8.2	CTD-3131K8.2	Targeted lncRNA	ASO_G0269439_AD_05	GeneDesign	CGACGCTTACTACCCT	16
616	CTD-3138B18.5	CTD-3138B18.5	Targeted lncRNA	ASO_G0268516_02	Exiqon	GGCTAAACATTCTTAC	16
617	CTD-3138B18.5	CTD-3138B18.5	Targeted lncRNA	ASO_G0268516_03	Exiqon	GTAGAATTGGTGCATT	16
618	CTD-3138B18.5	CTD-3138B18.5	Targeted lncRNA	ASO_G0268516_04	Exiqon	TAATGAACAGAGTGAC	16
619	CTD-3138B18.5	CTD-3138B18.5	Targeted lncRNA	ASO_G0268516_07	Exiqon	AGAGAGCTTTTGATTG	16
620	CTD-3138B18.5	CTD-3138B18.5	Targeted lncRNA	ASO_G0268516_10	Exiqon	TTGGGTCAATTCTGGA	16
621	MHENCR	CTD-3184A7.4	Targeted lncRNA	ASO_G0232442_01	Exiqon	CTCGGCCAATCTAATT	16
622	MHENCR	CTD-3184A7.4	Targeted lncRNA	ASO_G0232442_02	Exiqon	TGCGGCGTTAGGAGCT	16
623	MHENCR	CTD-3184A7.4	Targeted lncRNA	ASO_G0232442_03	Exiqon	TACTGGGAACTGAATG	16
624	MHENCR	CTD-3184A7.4	Targeted lncRNA	ASO_G0232442_04	Exiqon	GCACCTGCTTCCTAT	15
625	MHENCR	CTD-3184A7.4	Targeted lncRNA	ASO_G0232442_07	Exiqon	GACCATCGTCCCTCGG	16
626	DANCR	DANCR	Targeted lncRNA	ASO_G0226950_01	Exiqon	GGATAGTTGGCTTAAG	16
627	DANCR	DANCR	Targeted lncRNA	ASO_G0226950_02	Exiqon	TAGCGCCTAGATAACG	16
628	DANCR	DANCR	Targeted lncRNA	ASO_G0226950_03	Exiqon	CTGCATTGAGTTAGCG	16
629	DANCR	DANCR	Targeted lncRNA	ASO_G0226950_04	Exiqon	CTCATGACCGGCTTAC	16
630	DANCR	DANCR	Targeted lncRNA	ASO_G0226950_05	Exiqon	GCTCAAGGTCGGCTGG	16
631	DANCR	DANCR	Targeted lncRNA	ASO_G0226950_AD_01	GeneDesign	TACGCATATTTGGCCT	16
632	DANCR	DANCR	Targeted lncRNA	ASO_G0226950_AD_03	GeneDesign	TGTATTGCTTGTTCTAT	17
633	DANCR	DANCR	Targeted lncRNA	ASO_G0226950_AD_04	GeneDesign	TTACAGGGTTCACTACTAT	19
634	DANCR	DANCR	Targeted lncRNA	ASO_G0226950_AD_07	GeneDesign	ACATAGTGGCGCGTCAG	17
635	DANCR	DANCR	Targeted lncRNA	ASO_G0226950_AD_08	GeneDesign	GAGACCGAAAGCCGAAG	17
636	DGUOK-AS1	DGUOK-AS1	Targeted lncRNA	ASO_G0237883_01	Exiqon	GAGTAAGACTTGGCGA	16
637	DGUOK-AS1	DGUOK-AS1	Targeted lncRNA	ASO_G0237883_02	Exiqon	AATCAACTTCAGCTCA	16
638	DGUOK-AS1	DGUOK-AS1	Targeted lncRNA	ASO_G0237883_03	Exiqon	GTAGGAAAGCCTCCTT	16
639	DGUOK-AS1	DGUOK-AS1	Targeted lncRNA	ASO_G0237883_04	Exiqon	GCTTGCACATCCAATT	16
640	DGUOK-AS1	DGUOK-AS1	Targeted lncRNA	ASO_G0237883_07	Exiqon	TGTGAAACTTGACTCA	16
641	DLGAP1-AS1	DLGAP1-AS1	Targeted lncRNA	ASO_G0177337_01	Exiqon	ACTAGGAGGTAAAGAA	16
642	DLGAP1-AS1	DLGAP1-AS1	Targeted lncRNA	ASO_G0177337_02	Exiqon	GTAATTCTTCCATCCT	16
643	DLGAP1-AS1	DLGAP1-AS1	Targeted lncRNA	ASO_G0177337_03	Exiqon	TACTAGGAGGTAAAGA	16
644	DLGAP1-AS1	DLGAP1-AS1	Targeted lncRNA	ASO_G0177337_04	Exiqon	CGTGTGCTGTGGTTAC	16
645	DLGAP1-AS1	DLGAP1-AS1	Targeted lncRNA	ASO_G0177337_09	Exiqon	ACAGATTGCAACGTA	15
646	DNAJC27-AS1	DNAJC27-AS1	Targeted lncRNA	ASO_G0224165_01	Exiqon	ATTCAAGCACTGTCAC	16
647	DNAJC27-AS1	DNAJC27-AS1	Targeted lncRNA	ASO_G0224165_04	Exiqon	ACGAGGCCTTAGAAAC	16
648	DNAJC27-AS1	DNAJC27-AS1	Targeted lncRNA	ASO_G0224165_06	Exiqon	TTAGAAACTCGGTAAC	16
649	DNAJC27-AS1	DNAJC27-AS1	Targeted lncRNA	ASO_G0224165_09	Exiqon	GGACGAGGCCTTAGAA	16
650	DNAJC27-AS1	DNAJC27-AS1	Targeted lncRNA	ASO_G0224165_10	Exiqon	AGCAGACGTCGAGGTC	16
651	DNAJC27-AS1	DNAJC27-AS1	Targeted lncRNA	ASO_G0224165_AD_01	GeneDesign	AAACGCCTCCCGTCCG	16
652	DNAJC27-AS1	DNAJC27-AS1	Targeted lncRNA	ASO_G0224165_AD_03	GeneDesign	AATCGCTTCACGCCTT	16
653	DNAJC27-AS1	DNAJC27-AS1	Targeted lncRNA	ASO_G0224165_AD_07	GeneDesign	CGAAGCGAACAGCGGG	16
654	DNAJC27-AS1	DNAJC27-AS1	Targeted lncRNA	ASO_G0224165_AD_08	GeneDesign	GACCCGCCCTGAAGAG	16
655	DNAJC27-AS1	DNAJC27-AS1	Targeted lncRNA	ASO_G0224165_AD_10	GeneDesign	GACGAGACACTACCAG	16
656	DNM3OS	DNM3OS	Targeted lncRNA	ASO_G0230630_01	Exiqon	TAGTGTGCAAAACTTA	16
657	DNM3OS	DNM3OS	Targeted lncRNA	ASO_G0230630_02	Exiqon	TCAGTGCAACAGAAAG	16
658	DNM3OS	DNM3OS	Targeted lncRNA	ASO_G0230630_03	Exiqon	CCAGTGCCTTAAAATA	16
659	DNM3OS	DNM3OS	Targeted lncRNA	ASO_G0230630_05	Exiqon	GACGTGGCACATTTGC	16
660	DNM3OS	DNM3OS	Targeted lncRNA	ASO_G0230630_06	Exiqon	AGTTGAAGATGCTCAC	16
661	DNM3OS	DNM3OS	Targeted lncRNA	ASO_G0230630_AD_01	GeneDesign	TACCTTTGATCTTTAATTT	19
662	DNM3OS	DNM3OS	Targeted lncRNA	ASO_G0230630_AD_02	GeneDesign	ACGTTATTGTGATGGGT	17
663	DNM3OS	DNM3OS	Targeted lncRNA	ASO_G0230630_AD_04	GeneDesign	TTGATCCAGTTAACTC	16
664	DNM3OS	DNM3OS	Targeted lncRNA	ASO_G0230630_AD_09	GeneDesign	AATTGTTTCGGAATAGA	17
665	DNM3OS	DNM3OS	Targeted lncRNA	ASO_G0230630_AD_10	GeneDesign	CTTGGTCCCTAGTGTGCAA	19
666	NRAV	DYNLL1-AS1	Targeted lncRNA	ASO_G0248008_01	Exiqon	CCGCTTGATCTGTAAT	16
667	NRAV	DYNLL1-AS1	Targeted lncRNA	ASO_G0248008_02	Exiqon	CACATGGCTTAGTAGG	16
668	NRAV	DYNLL1-AS1	Targeted lncRNA	ASO_G0248008_04	Exiqon	ATCCCGCCTCTTAGTC	16
669	NRAV	DYNLL1-AS1	Targeted lncRNA	ASO_G0248008_08	Exiqon	CACAAGACCACTTTGC	16
670	NRAV	DYNLL1-AS1	Targeted lncRNA	ASO_G0248008_10	Exiqon	GGTCTTCAATCAACTC	16
671	EIF3J-DT	EIF3J-AS1	Targeted lncRNA	ASO_G0179523_03	Exiqon	GCCAAGTTGATAGATA	16
672	EIF3J-DT	EIF3J-AS1	Targeted lncRNA	ASO_G0179523_04	Exiqon	CAGTCATCACAGTGTC	16
673	EIF3J-DT	EIF3J-AS1	Targeted lncRNA	ASO_G0179523_07	Exiqon	TTTAACTGGGCTGTAG	16
674	EIF3J-DT	EIF3J-AS1	Targeted lncRNA	ASO_G0179523_08	Exiqon	TCTTGCCTCCTTCCAA	16
675	EIF3J-DT	EIF3J-AS1	Targeted lncRNA	ASO_G0179523_09	Exiqon	GTGACTAACTCGAGGC	16
676	EMC7	EMC7	Positive Control	ASO_G0134153_POS_01	Exiqon	CGATCTCCTATGCCGAC	17
677	EMC7	EMC7	Positive Control	ASO_G0134153_POS_02	Exiqon	TAAATCCTCATAGGCTC	17
678	EMC7	EMC7	Positive Control	ASO_G0134153_POS_03	Exiqon	TAACACGCAGCTAAGAT	17
679	EMC7	EMC7	Positive Control	ASO_G0134153_POS_05	Exiqon	TAATGAGTGTAGGAGCG	17
680	EMC7	EMC7	Positive Control	ASO_G0134153_POS_07	Exiqon	TGTAAGAGATCAACGTCG	18
681	EMX2OS	EMX2OS	Targeted lncRNA	ASO_G0229847_01	Exiqon	GCTGATCGAACTGATA	16
682	EMX2OS	EMX2OS	Targeted lncRNA	ASO_G0229847_02	Exiqon	ACACAATCCCCGGCTT	16
683	EMX2OS	EMX2OS	Targeted lncRNA	ASO_G0229847_03	Exiqon	CAAGCAGAGAGGTGGC	16
684	EMX2OS	EMX2OS	Targeted lncRNA	ASO_G0229847_04	Exiqon	CCATTAGAATGAGGTT	16
685	EMX2OS	EMX2OS	Targeted lncRNA	ASO_G0229847_05	Exiqon	AGGCTAGAGGAATCTG	16
686	EMX2OS	EMX2OS	Targeted lncRNA	ASO_G0229847_AD_02	GeneDesign	GTAATGTATAAGAGTTATG	19
687	EMX2OS	EMX2OS	Targeted lncRNA	ASO_G0229847_AD_03	GeneDesign	GCGTAAGGCAGCAGCG	16
688	EMX2OS	EMX2OS	Targeted lncRNA	ASO_G0229847_AD_04	GeneDesign	GCAATTGTATACATCCG	17
689	EMX2OS	EMX2OS	Targeted lncRNA	ASO_G0229847_AD_05	GeneDesign	AGGTGAGTGTGGTTACG	17
690	EMX2OS	EMX2OS	Targeted lncRNA	ASO_G0229847_AD_06	GeneDesign	TTGTCCAGGGATGTACG	17
691	ERVK13-1	ERVK13-1	Targeted lncRNA	ASO_G0260565_01	Exiqon	CCTTAACACTTCGGAT	16
692	ERVK13-1	ERVK13-1	Targeted lncRNA	ASO_G0260565_02	Exiqon	CGCCTAATTCATGGTT	16
693	ERVK13-1	ERVK13-1	Targeted lncRNA	ASO_G0260565_03	Exiqon	AAGCCTCGCACTCTT	15
694	ERVK13-1	ERVK13-1	Targeted lncRNA	ASO_G0260565_04	Exiqon	CAGACCGAATTAGAAG	16
695	ERVK13-1	ERVK13-1	Targeted lncRNA	ASO_G0260565_07	Exiqon	GCCATCTGCCAAAGAA	16
696	ERVK13-1	ERVK13-1	Targeted lncRNA	ASO_G0260565_AD_02	GeneDesign	CTTTGACATGACTCTCG	17
697	ERVK13-1	ERVK13-1	Targeted lncRNA	ASO_G0260565_AD_04	GeneDesign	TTACCACCTGAACAGCG	17
698	ERVK13-1	ERVK13-1	Targeted lncRNA	ASO_G0260565_AD_06	GeneDesign	CGGATACAAGACAGAAG	17
699	ERVK13-1	ERVK13-1	Targeted lncRNA	ASO_G0260565_AD_07	GeneDesign	ACCGGTGGTATACTTA	16
700	ERVK13-1	ERVK13-1	Targeted lncRNA	ASO_G0260565_AD_08	GeneDesign	TACATGAGGATAGTGATTA	19
701	ERVK3-1	ERVK3-1	Targeted lncRNA	ASO_G0142396_01	Exiqon	GAAGGACGACGAATGC	16
702	ERVK3-1	ERVK3-1	Targeted lncRNA	ASO_G0142396_02	Exiqon	TAACGTGGATTAGTGG	16
703	ERVK3-1	ERVK3-1	Targeted lncRNA	ASO_G0142396_03	Exiqon	CGAATAGGCAGTGATG	16
704	ERVK3-1	ERVK3-1	Targeted lncRNA	ASO_G0142396_06	Exiqon	TTCACAGCAGTAGCAT	16
705	ERVK3-1	ERVK3-1	Targeted lncRNA	ASO_G0142396_08	Exiqon	GGTTGCTTCACTGTGG	16
706	ERVK3-1	ERVK3-1	Targeted lncRNA	ASO_G0142396_AD_01	GeneDesign	GTAAGCAGCATCTGGAAGT	19
707	ERVK3-1	ERVK3-1	Targeted lncRNA	ASO_G0142396_AD_02	GeneDesign	CGATCCTATAGACTAT	16
708	ERVK3-1	ERVK3-1	Targeted lncRNA	ASO_G0142396_AD_05	GeneDesign	AGCATCTTTCTACAAGCTG	19
709	ERVK3-1	ERVK3-1	Targeted lncRNA	ASO_G0142396_AD_07	GeneDesign	GTGATGTTTACGTGGAG	17
710	ERVK3-1	ERVK3-1	Targeted lncRNA	ASO_G0142396_AD_08	GeneDesign	GCGTCTTACACACTGC	16
711	FBXL19-AS1	FBXL19-AS1	Targeted lncRNA	ASO_G0260852_01	Exiqon	AGGTTGCGGAAATCGT	16
712	FBXL19-AS1	FBXL19-AS1	Targeted lncRNA	ASO_G0260852_02	Exiqon	AGTGAACTTGGTGGAG	16
713	FBXL19-AS1	FBXL19-AS1	Targeted lncRNA	ASO_G0260852_04	Exiqon	AGGCGGACATTCTTTA	16
714	FBXL19-AS1	FBXL19-AS1	Targeted lncRNA	ASO_G0260852_07	Exiqon	CGAGTGGCATCGTCAT	16
715	FBXL19-AS1	FBXL19-AS1	Targeted lncRNA	ASO_G0260852_08	Exiqon	AAGGAGGTCGGGTCGG	16
716	FBXL19-AS1	FBXL19-AS1	Targeted lncRNA	ASO_G0260852_AD_01	GeneDesign	ACCTCGTAAGATCGAC	16
717	FBXL19-AS1	FBXL19-AS1	Targeted lncRNA	ASO_G0260852_AD_02	GeneDesign	CAACCAACAAGTCCTCGC	18
718	FBXL19-AS1	FBXL19-AS1	Targeted lncRNA	ASO_G0260852_AD_03	GeneDesign	CCGCACGTCTTGTAAG	16
719	FBXL19-AS1	FBXL19-AS1	Targeted lncRNA	ASO_G0260852_AD_05	GeneDesign	CTTGAGATGATAGACGGG	18
720	FBXL19-AS1	FBXL19-AS1	Targeted lncRNA	ASO_G0260852_AD_09	GeneDesign	TCGCCTCGCAATTTGG	16
721	FGD5-AS1	FGD5-AS1	Targeted lncRNA	ASO_G0225733_01	Exiqon	GCGACGTCCACGAGTT	16
722	FGD5-AS1	FGD5-AS1	Targeted lncRNA	ASO_G0225733_02	Exiqon	TCAGTTGGCGAAAGGT	16
723	FGD5-AS1	FGD5-AS1	Targeted lncRNA	ASO_G0225733_03	Exiqon	CTGTGAAGCTTAGTGA	16
724	FGD5-AS1	FGD5-AS1	Targeted lncRNA	ASO_G0225733_04	Exiqon	TCAAAACACCGAGCCA	16
725	FGD5-AS1	FGD5-AS1	Targeted lncRNA	ASO_G0225733_05	Exiqon	GCGTAGCATAAAAGAA	16
726	FGD5-AS1	FGD5-AS1	Targeted lncRNA	ASO_G0225733_AD_03	GeneDesign	CGACCCTAATGACCGT	16
727	FGD5-AS1	FGD5-AS1	Targeted lncRNA	ASO_G0225733_AD_04	GeneDesign	GCGCATCTTTAGACCT	16
728	FGD5-AS1	FGD5-AS1	Targeted lncRNA	ASO_G0225733_AD_06	GeneDesign	CGACTAGTCAAGAATC	16
729	FGD5-AS1	FGD5-AS1	Targeted lncRNA	ASO_G0225733_AD_07	GeneDesign	TGGCTAAGCGAGAAGGC	17
730	FGD5-AS1	FGD5-AS1	Targeted lncRNA	ASO_G0225733_AD_08	GeneDesign	CCGAAGAGCTCAATACC	17
731	FLVCR1-DT	FLVCR1-AS1	Targeted lncRNA	ASO_G0198468_01	Exiqon	AGTCGCTTCATTCAAG	16
732	FLVCR1-DT	FLVCR1-AS1	Targeted lncRNA	ASO_G0198468_03	Exiqon	GGCGAGAAATAAAGTT	16
733	FLVCR1-DT	FLVCR1-AS1	Targeted lncRNA	ASO_G0198468_06	Exiqon	GAAACGTGGTCCTGTC	16
734	FLVCR1-DT	FLVCR1-AS1	Targeted lncRNA	ASO_G0198468_07	Exiqon	ACATTCCACGATTAAT	16
735	FLVCR1-DT	FLVCR1-AS1	Targeted lncRNA	ASO_G0198468_09	Exiqon	TTCCAGCAACACAACC	16
736	FOXN3-AS1	FOXN3-AS1	Targeted lncRNA	ASO_G0258920_01	Exiqon	AGGACCTAAGACGCAA	16
737	FOXN3-AS1	FOXN3-AS1	Targeted lncRNA	ASO_G0258920_02	Exiqon	CCGCATCGTAATTCTT	16
738	FOXN3-AS1	FOXN3-AS1	Targeted lncRNA	ASO_G0258920_03	Exiqon	ACACGAGGTGGTCGCT	16
739	FOXN3-AS1	FOXN3-AS1	Targeted lncRNA	ASO_G0258920_07	Exiqon	TCTTGACCAGAGAAAC	16
740	FOXN3-AS1	FOXN3-AS1	Targeted lncRNA	ASO_G0258920_08	Exiqon	CGGCCAGGCCCACGTT	16
741	FOXN3-AS1	FOXN3-AS1	Targeted lncRNA	ASO_G0258920_AD_01	GeneDesign	AGACCGCTCACGATGT	16
742	FOXN3-AS1	FOXN3-AS1	Targeted lncRNA	ASO_G0258920_AD_02	GeneDesign	CACCCTCAACTGACGC	16
743	FOXN3-AS1	FOXN3-AS1	Targeted lncRNA	ASO_G0258920_AD_07	GeneDesign	GTTCCGCACAACCCAC	16
744	FOXN3-AS1	FOXN3-AS1	Targeted lncRNA	ASO_G0258920_AD_09	GeneDesign	TTTCAGATAGACCGAC	16
745	FOXN3-AS1	FOXN3-AS1	Targeted lncRNA	ASO_G0258920_AD_10	GeneDesign	TTTGGGTAGGTCGCAT	16
746	FTX	FTX	Targeted lncRNA	ASO_G0230590_01	Exiqon	GAGTAACAGGCAGATC	16
747	FTX	FTX	Targeted lncRNA	ASO_G0230590_02	Exiqon	ACTGAGAGGCTAAGAT	16
748	FTX	FTX	Targeted lncRNA	ASO_G0230590_03	Exiqon	CTTCAGCAGTAGCATA	16
749	FTX	FTX	Targeted lncRNA	ASO_G0230590_05	Exiqon	TCGCCCTCTGATGAAC	16
750	FTX	FTX	Targeted lncRNA	ASO_G0230590_06	Exiqon	TCAAGACTTCACAATG	16
751	FTX	FTX	Targeted lncRNA	ASO_G0230590_AD_02	GeneDesign	AATAACATGGAGTAGGTAT	19
752	FTX	FTX	Targeted lncRNA	ASO_G0230590_AD_03	GeneDesign	ATAGTACATGTAAAGTTGG	19
753	FTX	FTX	Targeted lncRNA	ASO_G0230590_AD_04	GeneDesign	CCGTAATTCATCCTCG	16
754	FTX	FTX	Targeted lncRNA	ASO_G0230590_AD_07	GeneDesign	CTCACTGGAGGTTAACC	17
755	FTX	FTX	Targeted lncRNA	ASO_G0230590_AD_08	GeneDesign	CTAACTATGTCTGTATCTA	19
756	GAS6-DT	GAS6-AS2	Targeted lncRNA	ASO_G0272695_01	Exiqon	TTTTGAAGTAGCCGTG	16
757	GAS6-DT	GAS6-AS2	Targeted lncRNA	ASO_G0272695_02	Exiqon	AAGTTGGTCAGCGGTT	16
758	GAS6-DT	GAS6-AS2	Targeted lncRNA	ASO_G0272695_03	Exiqon	TAGATGATAGGAGGCA	16
759	GAS6-DT	GAS6-AS2	Targeted lncRNA	ASO_G0272695_04	Exiqon	TCAAAACGAGCAGTTG	16
760	GAS6-DT	GAS6-AS2	Targeted lncRNA	ASO_G0272695_05	Exiqon	TTACACTCTTTGAAGT	16
761	GS1-124K5.4	GS1-124K5.4	Targeted lncRNA	ASO_G0237310_05	Exiqon	CAGGTGACGCGAGTGT	16
762	GS1-124K5.4	GS1-124K5.4	Targeted lncRNA	ASO_G0237310_06	Exiqon	CGGAGCTAGCGGACT	15
763	GS1-124K5.4	GS1-124K5.4	Targeted lncRNA	ASO_G0237310_07	Exiqon	CACCGCCTGCTGACAC	16
764	GS1-124K5.4	GS1-124K5.4	Targeted lncRNA	ASO_G0237310_08	Exiqon	GAACAGGTCCTTCGGC	16
765	GS1-124K5.4	GS1-124K5.4	Targeted lncRNA	ASO_G0237310_09	Exiqon	GCGGTAAAGCTCCTCC	16
766	GS1-124K5.4	GS1-124K5.4	Targeted lncRNA	ASO_G0237310_AD_02	GeneDesign	AGCTCCCTAATGCGGT	16
767	GS1-124K5.4	GS1-124K5.4	Targeted lncRNA	ASO_G0237310_AD_03	GeneDesign	AGCTTATTGGTGTCGG	16
768	GS1-124K5.4	GS1-124K5.4	Targeted lncRNA	ASO_G0237310_AD_05	GeneDesign	CTTCGGCATCCTGTAG	16
769	GS1-124K5.4	GS1-124K5.4	Targeted lncRNA	ASO_G0237310_AD_08	GeneDesign	GCTCCATCGCATATAT	16
770	GS1-124K5.4	GS1-124K5.4	Targeted lncRNA	ASO_G0237310_AD_10	GeneDesign	TGCCTGAACGTGCCCT	16
771	OTUD6B-AS1	GS1-251I9.4	Targeted lncRNA	ASO_G0253738_01	Exiqon	GAATGAAATAGACGTT	16
772	OTUD6B-AS1	GS1-251I9.4	Targeted lncRNA	ASO_G0253738_02	Exiqon	GGTTAGAGATTGATTT	16
773	OTUD6B-AS1	GS1-251I9.4	Targeted lncRNA	ASO_G0253738_03	Exiqon	TACAGAAGGATTACTC	16
774	OTUD6B-AS1	GS1-251I9.4	Targeted lncRNA	ASO_G0253738_05	Exiqon	TGATAACTTGGCAGAG	16
775	OTUD6B-AS1	GS1-251I9.4	Targeted lncRNA	ASO_G0253738_07	Exiqon	TCTGACTGGATGCTTG	16
776	HCG11	HCG11	Targeted lncRNA	ASO_G0228223_01	Exiqon	AACGAAAATGCAGACA	16
777	HCG11	HCG11	Targeted lncRNA	ASO_G0228223_02	Exiqon	AACTCCGGAAGACATG	16
778	HCG11	HCG11	Targeted lncRNA	ASO_G0228223_03	Exiqon	AGCGAATGCACACAAA	16
779	HCG11	HCG11	Targeted lncRNA	ASO_G0228223_05	Exiqon	TAGAGATGGCTGAACA	16
780	HCG11	HCG11	Targeted lncRNA	ASO_G0228223_06	Exiqon	TTCAAACTGCACTTAA	16
781	HCG11	HCG11	Targeted lncRNA	ASO_G0228223_AD_01	GeneDesign	GTACACGCATGTGTAAT	17
782	HCG11	HCG11	Targeted lncRNA	ASO_G0228223_AD_07	GeneDesign	TTCCCTTTCTGACCTCTAC	19
783	HCG11	HCG11	Targeted lncRNA	ASO_G0228223_AD_08	GeneDesign	GCAACCTCTAGATGTTA	17
784	HCG11	HCG11	Targeted lncRNA	ASO_G0228223_AD_09	GeneDesign	ACATCGACTAGATATA	16
785	HCG11	HCG11	Targeted lncRNA	ASO_G0228223_AD_10	GeneDesign	GCAAGTATAGACAGTAATA	19
786	HOTAIR	HOTAIR	Positive Control	ASO_G0228630_POS_03	Exiqon	CCACTCTCTCATACTAAAT	19
787	HOTAIR	HOTAIR	Positive Control	ASO_G0228630_POS_04	Exiqon	GTGAACAAACGAGAGCG	17
788	HOTAIR	HOTAIR	Positive Control	ASO_G0228630_POS_05	Exiqon	CGGACAGGGAAATCAACTA	19
789	HOTAIR	HOTAIR	Positive Control	ASO_G0228630_POS_06	Exiqon	CTGGGAATGTAAGAACG	17
790	HOTAIR	HOTAIR	Positive Control	ASO_G0228630_POS_07	Exiqon	AGTGCAAAGTCCCGTTT	17
791	HOXB-AS1	HOXB-AS1	Targeted lncRNA	ASO_G0230148_02	Exiqon	GAAGCGCCCAAATTAA	16
792	HOXB-AS1	HOXB-AS1	Targeted lncRNA	ASO_G0230148_05	Exiqon	CACAATCCTCTTCCGG	16
793	HOXB-AS1	HOXB-AS1	Targeted lncRNA	ASO_G0230148_06	Exiqon	TCGCCGTGTAGAGAT	15
794	HOXB-AS1	HOXB-AS1	Targeted lncRNA	ASO_G0230148_07	Exiqon	TCACGTGACCCGAAG	15
795	HOXB-AS1	HOXB-AS1	Targeted lncRNA	ASO_G0230148_09	Exiqon	TCAGGGTAGAATCCAA	16
796	HOXD-AS2	HOXD-AS2	Targeted lncRNA	ASO_G0237380_01	Exiqon	TGAGGCAAATTGACTA	16
797	HOXD-AS2	HOXD-AS2	Targeted lncRNA	ASO_G0237380_02	Exiqon	TTCACCAACATGAGCG	16
798	HOXD-AS2	HOXD-AS2	Targeted lncRNA	ASO_G0237380_04	Exiqon	CCAAGGACATTTACTT	16
799	HOXD-AS2	HOXD-AS2	Targeted lncRNA	ASO_G0237380_05	Exiqon	TCAGTGCAAAGTGTCT	16
800	HOXD-AS2	HOXD-AS2	Targeted lncRNA	ASO_G0237380_07	Exiqon	AACTTGCCCCATCTGC	16
801	HOXD-AS2	HOXD-AS2	Targeted lncRNA	ASO_G0237380_AD_01	GeneDesign	TTGCGGTCGTCATTGG	16
802	HOXD-AS2	HOXD-AS2	Targeted lncRNA	ASO_G0237380_AD_02	GeneDesign	CAAAGTTAGGGCCCATTGG	19
803	HOXD-AS2	HOXD-AS2	Targeted lncRNA	ASO_G0237380_AD_03	GeneDesign	GAAGGAAGAGAGGAGGCGG	19
804	HOXD-AS2	HOXD-AS2	Targeted lncRNA	ASO_G0237380_AD_04	GeneDesign	TCACTCGGTCCGCATCG	17
805	HOXD-AS2	HOXD-AS2	Targeted lncRNA	ASO_G0237380_AD_08	GeneDesign	AGAGTTTCAAACGGGTA	17
806	JPX	JPX	Targeted lncRNA	ASO_G0225470_01	Exiqon	TTAGGCGATCAGCGAG	16
807	JPX	JPX	Targeted lncRNA	ASO_G0225470_02	Exiqon	GTTGCTCAAGATTACT	16
808	JPX	JPX	Targeted lncRNA	ASO_G0225470_03	Exiqon	TTCGTCAGTAGAAGTT	16
809	JPX	JPX	Targeted lncRNA	ASO_G0225470_04	Exiqon	AAACGCCGCCATCTTA	16
810	JPX	JPX	Targeted lncRNA	ASO_G0225470_05	Exiqon	CAATTGGATGGAAATG	16
811	JPX	JPX	Targeted lncRNA	ASO_G0225470_AD_03	GeneDesign	ATACGCTTCCCGATTATC	18
812	JPX	JPX	Targeted lncRNA	ASO_G0225470_AD_04	GeneDesign	ATTAACATACCAGTCGTC	18
813	JPX	JPX	Targeted lncRNA	ASO_G0225470_AD_05	GeneDesign	GACAACATATTACCTCGC	18
814	JPX	JPX	Targeted lncRNA	ASO_G0225470_AD_09	GeneDesign	TACAATTATACGCCAGTC	18
815	JPX	JPX	Targeted lncRNA	ASO_G0225470_AD_10	GeneDesign	TGTGCTATCAACCCGT	16
816	KANSL1-AS1	KANSL1-AS1	Targeted lncRNA	ASO_G0214401_01	Exiqon	GTCAGGATTGGTTGAT	16
817	KANSL1-AS1	KANSL1-AS1	Targeted lncRNA	ASO_G0214401_02	Exiqon	AAATCCAGAAGTCATA	16
818	KANSL1-AS1	KANSL1-AS1	Targeted lncRNA	ASO_G0214401_03	Exiqon	CCTCCATCATTTTTAG	16
819	KANSL1-AS1	KANSL1-AS1	Targeted lncRNA	ASO_G0214401_06	Exiqon	GATTGAAGAACCTTTT	16
820	KANSL1-AS1	KANSL1-AS1	Targeted lncRNA	ASO_G0214401_10	Exiqon	AAAACATCGGCCACGG	16
821	KTN1-AS1	KTN1-AS1	Targeted lncRNA	ASO_G0186615_03	Exiqon	GATAGAGGGATTAATG	16
822	KTN1-AS1	KTN1-AS1	Targeted lncRNA	ASO_G0186615_04	Exiqon	AAGCAATTCCAGATCC	16
823	KTN1-AS1	KTN1-AS1	Targeted lncRNA	ASO_G0186615_06	Exiqon	AACGTCACGCATCTGA	16
824	KTN1-AS1	KTN1-AS1	Targeted lncRNA	ASO_G0186615_09	Exiqon	TGAGCTCTTAGATGAT	16
825	KTN1-AS1	KTN1-AS1	Targeted lncRNA	ASO_G0186615_10	Exiqon	TGTAGACCTGGAAGAA	16
826	CYTOR	LINC00152	Targeted lncRNA	ASO_G0222041_01	Exiqon	GGATTAAGACACATAG	16
827	CYTOR	LINC00152	Targeted lncRNA	ASO_G0222041_02	Exiqon	GGCTGAGTCGTGATTT	16
828	CYTOR	LINC00152	Targeted lncRNA	ASO_G0222041_03	Exiqon	TTCGGTGTCTGTCATA	16
829	CYTOR	LINC00152	Targeted lncRNA	ASO_G0222041_04	Exiqon	AAGGCGCACACCTCAG	16
830	CYTOR	LINC00152	Targeted lncRNA	ASO_G0222041_06	Exiqon	TCAAGGAGAGGCTGGT	16
831	CYTOR	LINC00152	Targeted lncRNA	ASO_G0222041_AD_01	GeneDesign	ATTTGTTAGGGATATGTTT	19
832	CYTOR	LINC00152	Targeted lncRNA	ASO_G0222041_AD_06	GeneDesign	CTAACCTTTCAGCCTATAT	19
833	CYTOR	LINC00152	Targeted lncRNA	ASO_G0222041_AD_07	GeneDesign	CTATGACATTAGCGCG	16
834	CYTOR	LINC00152	Targeted lncRNA	ASO_G0222041_AD_08	GeneDesign	GACGCTCGTAGCAAACC	17
835	CYTOR	LINC00152	Targeted lncRNA	ASO_G0222041_AD_10	GeneDesign	AGTTACCAAGCATGTACCA	19
836	OLMALINC	LINC00263	Targeted lncRNA	ASO_G0235823_01	Exiqon	GATTGCAGACAGGAAT	16
837	OLMALINC	LINC00263	Targeted lncRNA	ASO_G0235823_03	Exiqon	TAGGGCAGACTGAGGT	16
838	OLMALINC	LINC00263	Targeted lncRNA	ASO_G0235823_06	Exiqon	ATCAGTTAGCGTGGG	15
839	OLMALINC	LINC00263	Targeted lncRNA	ASO_G0235823_07	Exiqon	TGGAGACGGCTAAAGC	16
840	OLMALINC	LINC00263	Targeted lncRNA	ASO_G0235823_10	Exiqon	CCGTCCTGGTTAGCAA	16
841	OLMALINC	LINC00263	Targeted lncRNA	ASO_G0235823_AD_01	GeneDesign	CATAAGATCGGGAACC	16
842	OLMALINC	LINC00263	Targeted lncRNA	ASO_G0235823_AD_04	GeneDesign	CGTAGTATCTTAAAGG	16
843	OLMALINC	LINC00263	Targeted lncRNA	ASO_G0235823_AD_06	GeneDesign	CTTTACCCATACTCCG	16
844	OLMALINC	LINC00263	Targeted lncRNA	ASO_G0235823_AD_08	GeneDesign	TACAGTATCGTAGTTTGC	18
845	OLMALINC	LINC00263	Targeted lncRNA	ASO_G0235823_AD_10	GeneDesign	TTTCCATAAGAGGCGT	16
846	LINC00339	LINC00339	Targeted lncRNA	ASO_G0218510_01	Exiqon	TTCTAGCATGGTCTTA	16
847	LINC00339	LINC00339	Targeted lncRNA	ASO_G0218510_02	Exiqon	GTCACACAGTGCAAAA	16
848	LINC00339	LINC00339	Targeted lncRNA	ASO_G0218510_03	Exiqon	ACTTAGCCAGTGATTC	16
849	LINC00339	LINC00339	Targeted lncRNA	ASO_G0218510_04	Exiqon	GGACGAGGAAAGATCA	16
850	LINC00339	LINC00339	Targeted lncRNA	ASO_G0218510_05	Exiqon	TTGATCATTCTGGACT	16
851	LINC00339	LINC00339	Targeted lncRNA	ASO_G0218510_AD_03	GeneDesign	GCGATGACTCAACCGAT	17
852	LINC00339	LINC00339	Targeted lncRNA	ASO_G0218510_AD_05	GeneDesign	CGCTGACTAGCTGCCG	16
853	LINC00339	LINC00339	Targeted lncRNA	ASO_G0218510_AD_06	GeneDesign	TCAAAGAAAGTGGAAGTTC	19
854	LINC00339	LINC00339	Targeted lncRNA	ASO_G0218510_AD_09	GeneDesign	GCGCCCTTACTTCCTA	16
855	LINC00339	LINC00339	Targeted lncRNA	ASO_G0218510_AD_10	GeneDesign	CGTCCAGCAAGGTCCTA	17
856	LINC00467	LINC00467	Targeted lncRNA	ASO_G0153363_02	Exiqon	CGACCGCGTAGGGAA	15
857	LINC00467	LINC00467	Targeted lncRNA	ASO_G0153363_03	Exiqon	CGACTTGACAACCTCA	16
858	LINC00467	LINC00467	Targeted lncRNA	ASO_G0153363_05	Exiqon	CTGGCTTCCTGAAGAC	16
859	LINC00467	LINC00467	Targeted lncRNA	ASO_G0153363_08	Exiqon	ACCGAAGGTGCTGAAC	16
860	LINC00467	LINC00467	Targeted lncRNA	ASO_G0153363_09	Exiqon	AGGATCATCTGAAGAA	16
861	SMIM26	LINC00493	Targeted lncRNA	ASO_G0232388_03	Exiqon	CCACATAAAATCCTT	15
862	SMIM26	LINC00493	Targeted lncRNA	ASO_G0232388_04	Exiqon	GGAATCAGGGCAACTA	16
863	SMIM26	LINC00493	Targeted lncRNA	ASO_G0232388_05	Exiqon	TGCCGATCCCGTAGAC	16
864	SMIM26	LINC00493	Targeted lncRNA	ASO_G0232388_06	Exiqon	AAATCCTTTTGGGCGT	16
865	SMIM26	LINC00493	Targeted lncRNA	ASO_G0232388_07	Exiqon	AGACCACCGACATCCG	16
866	SMIM26	LINC00493	Targeted lncRNA	ASO_G0232388_AD_02	GeneDesign	CGACTTCGCCATTGTC	16
867	SMIM26	LINC00493	Targeted lncRNA	ASO_G0232388_AD_03	GeneDesign	CGATGAGGGACAGTAGTA	18
868	SMIM26	LINC00493	Targeted lncRNA	ASO_G0232388_AD_04	GeneDesign	CGCCGAAGAGCCCTAC	16
869	SMIM26	LINC00493	Targeted lncRNA	ASO_G0232388_AD_08	GeneDesign	GCACCCGTTTCAATTAGT	18
870	SMIM26	LINC00493	Targeted lncRNA	ASO_G0232388_AD_09	GeneDesign	TGCCTCGATTCTCGCA	16
871	LINC00511	LINC00511	Targeted lncRNA	ASO_G0227036_01	Exiqon	CGGTGTAAACGTCTTT	16
872	LINC00511	LINC00511	Targeted lncRNA	ASO_G0227036_02	Exiqon	GTGTATGATCGAAGCA	16
873	LINC00511	LINC00511	Targeted lncRNA	ASO_G0227036_03	Exiqon	TACACGGAGCAGGAAC	16
874	LINC00511	LINC00511	Targeted lncRNA	ASO_G0227036_04	Exiqon	GAGAAGCGCAGAACGA	16
875	LINC00511	LINC00511	Targeted lncRNA	ASO_G0227036_08	Exiqon	ATTCGCCTTGGAAATA	16
876	LINC00511	LINC00511	Targeted lncRNA	ASO_G0227036_AD_03	GeneDesign	CGACAAGTATCATCCATA	18
877	LINC00511	LINC00511	Targeted lncRNA	ASO_G0227036_AD_04	GeneDesign	GAACATTAACGCTCACTC	18
878	LINC00511	LINC00511	Targeted lncRNA	ASO_G0227036_AD_05	GeneDesign	GACCCTAACAATCGGCAT	18
879	LINC00511	LINC00511	Targeted lncRNA	ASO_G0227036_AD_07	GeneDesign	GCGAATCTAATATCAATG	18
880	LINC00511	LINC00511	Targeted lncRNA	ASO_G0227036_AD_10	GeneDesign	TGACCAATCCCATAGACG	18
881	LINC00517	LINC00517	Targeted lncRNA	ASO_G0259091_01	Exiqon	GAGGGTATGGTCAATT	16
882	LINC00517	LINC00517	Targeted lncRNA	ASO_G0259091_02	Exiqon	GTAGTGGCTTTAATAA	16
883	LINC00517	LINC00517	Targeted lncRNA	ASO_G0259091_05	Exiqon	GATAACACTTGAGGAT	16
884	LINC00517	LINC00517	Targeted lncRNA	ASO_G0259091_06	Exiqon	CTGAAAGCCTAGTGGA	16
885	LINC00517	LINC00517	Targeted lncRNA	ASO_G0259091_09	Exiqon	GATAGGAGAGTGATGG	16
886	LINC00517	LINC00517	Targeted lncRNA	ASO_G0259091_AD_03	GeneDesign	AGTCAGCCAACGTAAG	16
887	LINC00517	LINC00517	Targeted lncRNA	ASO_G0259091_AD_04	GeneDesign	CGAATTGGATTGCACAGG	18
888	LINC00517	LINC00517	Targeted lncRNA	ASO_G0259091_AD_06	GeneDesign	GCCGTTCTCCTTACAACC	18
889	LINC00517	LINC00517	Targeted lncRNA	ASO_G0259091_AD_07	GeneDesign	GTCTGCCTGAAGCGTT	16
890	LINC00517	LINC00517	Targeted lncRNA	ASO_G0259091_AD_10	GeneDesign	TTTGAAGTCCGATCTG	16
891	LINC00630	LINC00630	Targeted lncRNA	ASO_G0223546_01	Exiqon	TGATAAGCATCTGGTT	16
892	LINC00630	LINC00630	Targeted lncRNA	ASO_G0223546_02	Exiqon	GCTAACAGATCTGGAA	16
893	LINC00630	LINC00630	Targeted lncRNA	ASO_G0223546_04	Exiqon	AGAGTTGCACAGGGAG	16
894	LINC00630	LINC00630	Targeted lncRNA	ASO_G0223546_05	Exiqon	ATCTGCACTCACTCTT	16
895	LINC00630	LINC00630	Targeted lncRNA	ASO_G0223546_09	Exiqon	GTAAGTGCTGGTGGTC	16
896	LINC00654	LINC00654	Targeted lncRNA	ASO_G0205181_01	Exiqon	GTGACTAGCAGGAACG	16
897	LINC00654	LINC00654	Targeted lncRNA	ASO_G0205181_02	Exiqon	AGGTAGCGGTGTCATT	16
898	LINC00654	LINC00654	Targeted lncRNA	ASO_G0205181_03	Exiqon	TATGCCTTAACCGTTG	16
899	LINC00654	LINC00654	Targeted lncRNA	ASO_G0205181_04	Exiqon	ATAGCCAAGTGTGCAT	16
900	LINC00654	LINC00654	Targeted lncRNA	ASO_G0205181_05	Exiqon	TTCACTTGACCATAAC	16
901	LINC00654	LINC00654	Targeted lncRNA	ASO_G0205181_AD_01	GeneDesign	ACCCGTGTTTGAGGAT	16
902	LINC00654	LINC00654	Targeted lncRNA	ASO_G0205181_AD_02	GeneDesign	ACTCCACATCGTCTGA	16
903	LINC00654	LINC00654	Targeted lncRNA	ASO_G0205181_AD_03	GeneDesign	CATGACCTCCGCAACG	16
904	LINC00654	LINC00654	Targeted lncRNA	ASO_G0205181_AD_05	GeneDesign	CGAGTGAATATCCTAATG	18
905	LINC00654	LINC00654	Targeted lncRNA	ASO_G0205181_AD_10	GeneDesign	TGATTGAACACTGCCG	16
906	NORAD	LINC00657	Targeted lncRNA	ASO_G0260032_01	Exiqon	TTCGTAAAGCTTAGAT	16
907	NORAD	LINC00657	Targeted lncRNA	ASO_G0260032_02	Exiqon	CACAATGGATTAAGCT	16
908	NORAD	LINC00657	Targeted lncRNA	ASO_G0260032_04	Exiqon	TACCTCCTCTAAACTA	16
909	NORAD	LINC00657	Targeted lncRNA	ASO_G0260032_05	Exiqon	ATTCGCTCCTAAGCAT	16
910	NORAD	LINC00657	Targeted lncRNA	ASO_G0260032_06	Exiqon	CTAGACGTAAATTAGG	16
911	NORAD	LINC00657	Targeted lncRNA	ASO_G0260032_AD_01	GeneDesign	CACTAGTAATATTACCTTT	19
912	NORAD	LINC00657	Targeted lncRNA	ASO_G0260032_AD_06	GeneDesign	AATTAATGTGTTCTTATAG	19
913	NORAD	LINC00657	Targeted lncRNA	ASO_G0260032_AD_07	GeneDesign	CGCCATTAGTCACCGAG	17
914	NORAD	LINC00657	Targeted lncRNA	ASO_G0260032_AD_08	GeneDesign	CGACAGGCCGTTGTAC	16
915	NORAD	LINC00657	Targeted lncRNA	ASO_G0260032_AD_10	GeneDesign	ATCATACGTCGGCAAC	16
916	LINC00662	LINC00662	Targeted lncRNA	ASO_G0261824_02	Exiqon	CATCCGTCGTTGAGT	15
917	LINC00662	LINC00662	Targeted lncRNA	ASO_G0261824_04	Exiqon	TTAACACTGAATCCAC	16
918	LINC00662	LINC00662	Targeted lncRNA	ASO_G0261824_05	Exiqon	ATAGCTTCCTTCTAGT	16
919	LINC00662	LINC00662	Targeted lncRNA	ASO_G0261824_07	Exiqon	GAGACTTCTGTCATTA	16
920	LINC00662	LINC00662	Targeted lncRNA	ASO_G0261824_08	Exiqon	TCACTGTAGGCATAAA	16
921	LINC00667	LINC00667	Targeted lncRNA	ASO_G0263753_01	Exiqon	GGTCCGTAAGCTCGT	15
922	LINC00667	LINC00667	Targeted lncRNA	ASO_G0263753_05	Exiqon	AGAACGCCTGCATCAA	16
923	LINC00667	LINC00667	Targeted lncRNA	ASO_G0263753_06	Exiqon	GGAGGTCCATTCAACT	16
924	LINC00667	LINC00667	Targeted lncRNA	ASO_G0263753_08	Exiqon	GAGTCGCCGTTAAAC	15
925	LINC00667	LINC00667	Targeted lncRNA	ASO_G0263753_10	Exiqon	TACAGCGCGTCCACGA	16
926	LINC00667	LINC00667	Targeted lncRNA	ASO_G0263753_AD_01	GeneDesign	ACTAGGCATACGGTAAAG	18
927	LINC00667	LINC00667	Targeted lncRNA	ASO_G0263753_AD_02	GeneDesign	ACTCAAGCGTAGTTCATA	18
928	LINC00667	LINC00667	Targeted lncRNA	ASO_G0263753_AD_04	GeneDesign	AGTTTACGAAGAGTCACC	18
929	LINC00667	LINC00667	Targeted lncRNA	ASO_G0263753_AD_06	GeneDesign	GATCCGTTCCCTTGAG	16
930	LINC00667	LINC00667	Targeted lncRNA	ASO_G0263753_AD_09	GeneDesign	TCCAAATTAGTGTCCGAG	18
931	LINC00674	LINC00674	Targeted lncRNA	ASO_G0237854_02	Exiqon	GAAGGCTGCTAAACGA	16
932	LINC00674	LINC00674	Targeted lncRNA	ASO_G0237854_04	Exiqon	GTCATAGACAGATTGA	16
933	LINC00674	LINC00674	Targeted lncRNA	ASO_G0237854_05	Exiqon	TCCAAGTAAGTAGCCA	16
934	LINC00674	LINC00674	Targeted lncRNA	ASO_G0237854_06	Exiqon	GTGAACAGAAAGAGCA	16
935	LINC00674	LINC00674	Targeted lncRNA	ASO_G0237854_10	Exiqon	AATAGACTGATGCTCG	16
936	LINC00674	LINC00674	Targeted lncRNA	ASO_G0237854_AD_02	GeneDesign	CAGTTCGTCATATATCGT	18
937	LINC00674	LINC00674	Targeted lncRNA	ASO_G0237854_AD_04	GeneDesign	CGGCGTATTTCAAGGG	16
938	LINC00674	LINC00674	Targeted lncRNA	ASO_G0237854_AD_06	GeneDesign	GAATTGTACCCTCTCCGC	18
939	LINC00674	LINC00674	Targeted lncRNA	ASO_G0237854_AD_08	GeneDesign	TGAGACGGCTAAATAG	16
940	LINC00674	LINC00674	Targeted lncRNA	ASO_G0237854_AD_10	GeneDesign	TTGAACCTCACGCCTATA	18
941	LINC00702	LINC00702	Targeted lncRNA	ASO_G0233117_01	Exiqon	GATAGAGCAATGGTAT	16
942	LINC00702	LINC00702	Targeted lncRNA	ASO_G0233117_02	Exiqon	GTCAGTGCAACAGTTG	16
943	LINC00702	LINC00702	Targeted lncRNA	ASO_G0233117_03	Exiqon	TTGCCACATTCCTAGT	16
944	LINC00702	LINC00702	Targeted lncRNA	ASO_G0233117_04	Exiqon	TCATGGTAGTGCAGTA	16
945	LINC00702	LINC00702	Targeted lncRNA	ASO_G0233117_10	Exiqon	CTGGAGATGAGTAGTT	16
946	LINC00702	LINC00702	Targeted lncRNA	ASO_G0233117_AD_03	GeneDesign	TTTCTGGAGATGAGTAGTT	19
947	LINC00702	LINC00702	Targeted lncRNA	ASO_G0233117_AD_04	GeneDesign	AGGTTATAGTTATTTCCTT	19
948	LINC00702	LINC00702	Targeted lncRNA	ASO_G0233117_AD_07	GeneDesign	TGTGTAAATGAGGGATG	17
949	LINC00702	LINC00702	Targeted lncRNA	ASO_G0233117_AD_08	GeneDesign	CGTTTGTGTGTTGTGAG	17
950	LINC00702	LINC00702	Targeted lncRNA	ASO_G0233117_AD_09	GeneDesign	TGTTAGGATAATGATGC	17
951	LINC00707	LINC00707	Targeted lncRNA	ASO_G0238266_01	Exiqon	TGTAGAAGAGTGACGT	16
952	LINC00707	LINC00707	Targeted lncRNA	ASO_G0238266_03	Exiqon	ATAAATCACGGTGGCA	16
953	LINC00707	LINC00707	Targeted lncRNA	ASO_G0238266_04	Exiqon	TGTGATTGATTTGCTC	16
954	LINC00707	LINC00707	Targeted lncRNA	ASO_G0238266_05	Exiqon	AAATGGGCCGAAGGTG	16
955	LINC00707	LINC00707	Targeted lncRNA	ASO_G0238266_06	Exiqon	AATTGATCCAGTGCTA	16
956	LINC00707	LINC00707	Targeted lncRNA	ASO_G0238266_AD_02	GeneDesign	CCAAGTAACCCTACGTTA	18
957	LINC00707	LINC00707	Targeted lncRNA	ASO_G0238266_AD_03	GeneDesign	CGAACTTAACGCAGACTG	18
958	LINC00707	LINC00707	Targeted lncRNA	ASO_G0238266_AD_05	GeneDesign	GTAAGGCACACCAGAACG	18
959	LINC00707	LINC00707	Targeted lncRNA	ASO_G0238266_AD_06	GeneDesign	GTACCAGCCTTGCGTTAA	18
960	LINC00707	LINC00707	Targeted lncRNA	ASO_G0238266_AD_08	GeneDesign	GTGGCGGATAATTGAG	16
961	LINC00847	LINC00847	Targeted lncRNA	ASO_G0245060_01	Exiqon	TAAGGCCACTGCGATG	16
962	LINC00847	LINC00847	Targeted lncRNA	ASO_G0245060_02	Exiqon	GACGTGCCTGAGAGAG	16
963	LINC00847	LINC00847	Targeted lncRNA	ASO_G0245060_03	Exiqon	CCAGCCGGCGCACGAA	16
964	LINC00847	LINC00847	Targeted lncRNA	ASO_G0245060_06	Exiqon	GTGAGAACCGCAGAAG	16
965	LINC00847	LINC00847	Targeted lncRNA	ASO_G0245060_10	Exiqon	AGAAGATCAGGGTCCA	16
966	LINC00856	LINC00856	Targeted lncRNA	ASO_G0230417_01	Exiqon	ACTAGGTAGACTTCGG	16
967	LINC00856	LINC00856	Targeted lncRNA	ASO_G0230417_02	Exiqon	TCGGCTAAATTGGAAT	16
968	LINC00856	LINC00856	Targeted lncRNA	ASO_G0230417_04	Exiqon	CGCCTCTTTTGCGAA	15
969	LINC00856	LINC00856	Targeted lncRNA	ASO_G0230417_05	Exiqon	ATCCACGTCAGATCTA	16
970	LINC00856	LINC00856	Targeted lncRNA	ASO_G0230417_07	Exiqon	GAGAGATGAAGTGATA	16
971	LINC00862	LINC00862	Targeted lncRNA	ASO_G0203721_01	Exiqon	GTCAATGAGTCTTAGC	16
972	LINC00862	LINC00862	Targeted lncRNA	ASO_G0203721_02	Exiqon	AACAGTTAGGCATCGT	16
973	LINC00862	LINC00862	Targeted lncRNA	ASO_G0203721_03	Exiqon	GACAGGACAGGTTAGT	16
974	LINC00862	LINC00862	Targeted lncRNA	ASO_G0203721_04	Exiqon	GTCTGGATTACTCAAT	16
975	LINC00862	LINC00862	Targeted lncRNA	ASO_G0203721_05	Exiqon	AGAGGTAGGAGCAACA	16
976	DUBR	LINC00883	Targeted lncRNA	ASO_G0243701_01	Exiqon	TCGATGAGTCTAACAG	16
977	DUBR	LINC00883	Targeted lncRNA	ASO_G0243701_02	Exiqon	AGCAAGTGTAGTGTAG	16
978	DUBR	LINC00883	Targeted lncRNA	ASO_G0243701_03	Exiqon	TCACGCTAATTTTGAG	16
979	DUBR	LINC00883	Targeted lncRNA	ASO_G0243701_04	Exiqon	TCACGGAGACATAAGA	16
980	DUBR	LINC00883	Targeted lncRNA	ASO_G0243701_05	Exiqon	CTGCCTCAGCGATCAA	16
981	DUBR	LINC00883	Targeted lncRNA	ASO_G0243701_AD_01	GeneDesign	TTGCGGGAGTGATAGT	16
982	DUBR	LINC00883	Targeted lncRNA	ASO_G0243701_AD_05	GeneDesign	GCACTGGTACCACGCG	16
983	DUBR	LINC00883	Targeted lncRNA	ASO_G0243701_AD_07	GeneDesign	GACCACTTGATAAGAGC	17
984	DUBR	LINC00883	Targeted lncRNA	ASO_G0243701_AD_08	GeneDesign	CGTTGTTGGTACATTAC	17
985	DUBR	LINC00883	Targeted lncRNA	ASO_G0243701_AD_09	GeneDesign	TGGGTTAGGGTTATGGAGA	19
986	LINC00886	LINC00886	Targeted lncRNA	ASO_G0240875_01	Exiqon	TACTCAGGTGCCGAAA	16
987	LINC00886	LINC00886	Targeted lncRNA	ASO_G0240875_02	Exiqon	GGCTGAGGCTAGATTA	16
988	LINC00886	LINC00886	Targeted lncRNA	ASO_G0240875_03	Exiqon	TACAAGATTGGCATTC	16
989	LINC00886	LINC00886	Targeted lncRNA	ASO_G0240875_04	Exiqon	GGTTACGAAATGCAGG	16
990	LINC00886	LINC00886	Targeted lncRNA	ASO_G0240875_10	Exiqon	GTGGCCCTAATGACTA	16
991	LINC00899	LINC00899	Targeted lncRNA	ASO_G0231711_01	Exiqon	AGAACTTCTGGTGCGT	16
992	LINC00899	LINC00899	Targeted lncRNA	ASO_G0231711_03	Exiqon	AAGTGGTCGAATGCAG	16
993	LINC00899	LINC00899	Targeted lncRNA	ASO_G0231711_04	Exiqon	GCTCCGCGACTGTGCA	16
994	LINC00899	LINC00899	Targeted lncRNA	ASO_G0231711_05	Exiqon	CACGACGAAAAAAGCT	16
995	LINC00899	LINC00899	Targeted lncRNA	ASO_G0231711_06	Exiqon	GATTGCCGACTCCTTT	16
996	LINC00909	LINC00909	Targeted lncRNA	ASO_G0264247_01	Exiqon	GGCAATAATTTAACTC	16
997	LINC00909	LINC00909	Targeted lncRNA	ASO_G0264247_03	Exiqon	CCTCAAAGTCCACTAT	16
998	LINC00909	LINC00909	Targeted lncRNA	ASO_G0264247_04	Exiqon	CTGTGGAACAGGTGGT	16
999	LINC00909	LINC00909	Targeted lncRNA	ASO_G0264247_05	Exiqon	GTGTAGCATCCAGCAA	16
1000	LINC00909	LINC00909	Targeted lncRNA	ASO_G0264247_09	Exiqon	GAAGCCACCGGAAGT	15
1001	LINC00938	LINC00938	Targeted lncRNA	ASO_G0273015_01	Exiqon	GAGTGGAACTTAGCGA	16
1002	LINC00938	LINC00938	Targeted lncRNA	ASO_G0273015_02	Exiqon	AGTAGCGCGGCAGAGG	16
1003	LINC00938	LINC00938	Targeted lncRNA	ASO_G0273015_03	Exiqon	CGTTAATAGCTTACTT	16
1004	LINC00938	LINC00938	Targeted lncRNA	ASO_G0273015_04	Exiqon	ATTCGTGTGATGCATA	16
1005	LINC00938	LINC00938	Targeted lncRNA	ASO_G0273015_05	Exiqon	GGTGGTAGAAGTCGTT	16
1006	LINC00938	LINC00938	Targeted lncRNA	ASO_G0273015_AD_04	GeneDesign	ACACTATCGTATGTTTGTG	19
1007	LINC00938	LINC00938	Targeted lncRNA	ASO_G0273015_AD_05	GeneDesign	GATTCAGGCGAGCGGTG	17
1008	LINC00938	LINC00938	Targeted lncRNA	ASO_G0273015_AD_07	GeneDesign	ACGTTCTAAGTCTCGC	16
1009	LINC00938	LINC00938	Targeted lncRNA	ASO_G0273015_AD_08	GeneDesign	ATGTTGACAGATCTCTCGC	19
1010	LINC00938	LINC00938	Targeted lncRNA	ASO_G0273015_AD_10	GeneDesign	CGTTACTCTTACAAGCA	17
1011	LINC00941	LINC00941	Targeted lncRNA	ASO_G0235884_01	Exiqon	TTCGCAGAGTAATTAG	16
1012	LINC00941	LINC00941	Targeted lncRNA	ASO_G0235884_02	Exiqon	TACGTTAGAAGGATTT	16
1013	LINC00941	LINC00941	Targeted lncRNA	ASO_G0235884_04	Exiqon	GATAGAGGGCTCATTA	16
1014	LINC00941	LINC00941	Targeted lncRNA	ASO_G0235884_07	Exiqon	TAAGCATAGTTGGTCC	16
1015	LINC00941	LINC00941	Targeted lncRNA	ASO_G0235884_08	Exiqon	CGTTGCATAACCTGAC	16
1016	C10orf143	LINC00959	Targeted lncRNA	ASO_G0237489_02	Exiqon	TCGTGCAGAGGATGGT	16
1017	C10orf143	LINC00959	Targeted lncRNA	ASO_G0237489_03	Exiqon	CAAGCTCATAGGAAGT	16
1018	C10orf143	LINC00959	Targeted lncRNA	ASO_G0237489_04	Exiqon	CAACCAGGAACATTCG	16
1019	C10orf143	LINC00959	Targeted lncRNA	ASO_G0237489_05	Exiqon	GGATGGTGGATTTACT	16
1020	C10orf143	LINC00959	Targeted lncRNA	ASO_G0237489_09	Exiqon	CGCTAAGCTGTCCATG	16
1021	C10orf143	LINC00959	Targeted lncRNA	ASO_G0237489_AD_01	GeneDesign	CACCGATAGAATGCTA	16
1022	C10orf143	LINC00959	Targeted lncRNA	ASO_G0237489_AD_04	GeneDesign	CTCTCTTCGCCTATTACG	18
1023	C10orf143	LINC00959	Targeted lncRNA	ASO_G0237489_AD_05	GeneDesign	GCACTAACACGCTCAATG	18
1024	C10orf143	LINC00959	Targeted lncRNA	ASO_G0237489_AD_07	GeneDesign	GCTGACCACATACGATAC	18
1025	C10orf143	LINC00959	Targeted lncRNA	ASO_G0237489_AD_09	GeneDesign	TAACACGGTCTTGGTAAC	18
1026	LINC00963	LINC00963	Targeted lncRNA	ASO_G0204054_01	Exiqon	GTTACTGCGCCTTTTT	16
1027	LINC00963	LINC00963	Targeted lncRNA	ASO_G0204054_02	Exiqon	GATTTACCCAACTGTA	16
1028	LINC00963	LINC00963	Targeted lncRNA	ASO_G0204054_05	Exiqon	TACGACCTTGGACGG	15
1029	LINC00963	LINC00963	Targeted lncRNA	ASO_G0204054_06	Exiqon	GGTAACACGTGGATGA	16
1030	LINC00963	LINC00963	Targeted lncRNA	ASO_G0204054_10	Exiqon	CGTAAGTCAGATGCAT	16
1031	LINC00968	LINC00968	Targeted lncRNA	ASO_G0246430_01	Exiqon	TTTAGTAGTCGCGTTA	16
1032	LINC00968	LINC00968	Targeted lncRNA	ASO_G0246430_02	Exiqon	CGACTAAAGGAGTGGA	16
1033	LINC00968	LINC00968	Targeted lncRNA	ASO_G0246430_03	Exiqon	CATGGGCAATTAACGG	16
1034	LINC00968	LINC00968	Targeted lncRNA	ASO_G0246430_04	Exiqon	AAAGGCTGGAAGTGTC	16
1035	LINC00968	LINC00968	Targeted lncRNA	ASO_G0246430_05	Exiqon	TGTAGCATGCATTGAT	16
1036	LINC00968	LINC00968	Targeted lncRNA	ASO_G0246430_AD_03	GeneDesign	CCGAGTGATGAGATGAGC	18
1037	LINC00968	LINC00968	Targeted lncRNA	ASO_G0246430_AD_04	GeneDesign	CGTCGTTCAATTATCCTC	18
1038	LINC00968	LINC00968	Targeted lncRNA	ASO_G0246430_AD_05	GeneDesign	CTTACCCAGTTACCCGAC	18
1039	LINC00968	LINC00968	Targeted lncRNA	ASO_G0246430_AD_08	GeneDesign	GCTGTCTGAACCCGAATG	18
1040	LINC00968	LINC00968	Targeted lncRNA	ASO_G0246430_AD_10	GeneDesign	TTCATCTAATCGAGGG	16
1041	LINC01023	LINC01023	Targeted lncRNA	ASO_G0272523_01	Exiqon	GTCTAGAAAACCGAGG	16
1042	LINC01023	LINC01023	Targeted lncRNA	ASO_G0272523_06	Exiqon	CAGCGGGAAGCAGCAT	16
1043	LINC01023	LINC01023	Targeted lncRNA	ASO_G0272523_08	Exiqon	CGCTGCAGACGCCGTT	16
1044	LINC01023	LINC01023	Targeted lncRNA	ASO_G0272523_09	Exiqon	CGGCAAGGATTCAACC	16
1045	LINC01023	LINC01023	Targeted lncRNA	ASO_G0272523_10	Exiqon	CAGCACGGGAAATGCC	16
1046	LINC01085	LINC01085	Targeted lncRNA	ASO_G0248698_01	Exiqon	GTTAGAGCATTGATGA	16
1047	LINC01085	LINC01085	Targeted lncRNA	ASO_G0248698_04	Exiqon	ACGATTCTGATAATGG	16
1048	LINC01085	LINC01085	Targeted lncRNA	ASO_G0248698_05	Exiqon	GTAGAGGTATGAGGTA	16
1049	LINC01085	LINC01085	Targeted lncRNA	ASO_G0248698_07	Exiqon	ACTCTGCTTAAATTAG	16
1050	LINC01085	LINC01085	Targeted lncRNA	ASO_G0248698_08	Exiqon	TCCATAATCATCCTGT	16
1051	PPM1F-AS1	LL22NC03-86G7.1	Targeted lncRNA	ASO_G0224086_03	Exiqon	ATGATTTGAGTGTGGT	16
1052	PPM1F-AS1	LL22NC03-86G7.1	Targeted lncRNA	ASO_G0224086_04	Exiqon	AAGGGTGACGACATTG	16
1053	PPM1F-AS1	LL22NC03-86G7.1	Targeted lncRNA	ASO_G0224086_05	Exiqon	CAGAATCAAGGAGCAG	16
1054	PPM1F-AS1	LL22NC03-86G7.1	Targeted lncRNA	ASO_G0224086_06	Exiqon	AATTCGGCATTACTAG	16
1055	PPM1F-AS1	LL22NC03-86G7.1	Targeted lncRNA	ASO_G0224086_09	Exiqon	TGGAACACAAGTCGCT	16
1056	LOXL1-AS1	LOXL1-AS1	Targeted lncRNA	ASO_G0261801_01	Exiqon	CCAAGCAAATTCAGAG	16
1057	LOXL1-AS1	LOXL1-AS1	Targeted lncRNA	ASO_G0261801_02	Exiqon	TCACCGCTCCGGAAC	15
1058	LOXL1-AS1	LOXL1-AS1	Targeted lncRNA	ASO_G0261801_04	Exiqon	ACAAGGTCCTAACAGG	16
1059	LOXL1-AS1	LOXL1-AS1	Targeted lncRNA	ASO_G0261801_05	Exiqon	TACTCCCTGCTCGATT	16
1060	LOXL1-AS1	LOXL1-AS1	Targeted lncRNA	ASO_G0261801_07	Exiqon	CGGAACAGAGAGGGTA	16
1061	MAGI2-AS3	MAGI2-AS3	Targeted lncRNA	ASO_G0234456_01	Exiqon	TCGCACAGAGGCTGAA	16
1062	MAGI2-AS3	MAGI2-AS3	Targeted lncRNA	ASO_G0234456_02	Exiqon	GCTTCATGGATAAGTA	16
1063	MAGI2-AS3	MAGI2-AS3	Targeted lncRNA	ASO_G0234456_03	Exiqon	TCGGAGGGAGTCAGCG	16
1064	MAGI2-AS3	MAGI2-AS3	Targeted lncRNA	ASO_G0234456_04	Exiqon	GTTACTGGACTTAAGC	16
1065	MAGI2-AS3	MAGI2-AS3	Targeted lncRNA	ASO_G0234456_06	Exiqon	AGTTACAGGAATCTTT	16
1066	MALAT1	MALAT1	Experimental Control	ASO_MALAT1	Exiqon	CGTTAACTAGGCTTTA	16
1067	MAPKAPK5-AS1	MAPKAPK5-AS1	Targeted lncRNA	ASO_G0234608_03	Exiqon	ACTCCACGTAAGGTTA	16
1068	MAPKAPK5-AS1	MAPKAPK5-AS1	Targeted lncRNA	ASO_G0234608_05	Exiqon	TTAATGCTCCGTAAAC	16
1069	MAPKAPK5-AS1	MAPKAPK5-AS1	Targeted lncRNA	ASO_G0234608_06	Exiqon	GTTGGCAGAAGGAGTA	16
1070	MAPKAPK5-AS1	MAPKAPK5-AS1	Targeted lncRNA	ASO_G0234608_07	Exiqon	ACGACGCCAAACGGCT	16
1071	MAPKAPK5-AS1	MAPKAPK5-AS1	Targeted lncRNA	ASO_G0234608_09	Exiqon	ATTTAGGTCAGTAAGG	16
1072	MAPKAPK5-AS1	MAPKAPK5-AS1	Targeted lncRNA	ASO_G0234608_AD_01	GeneDesign	AAAGATCCATGTGCCG	16
1073	MAPKAPK5-AS1	MAPKAPK5-AS1	Targeted lncRNA	ASO_G0234608_AD_04	GeneDesign	CGGCTACCTTGTAAAGAC	18
1074	MAPKAPK5-AS1	MAPKAPK5-AS1	Targeted lncRNA	ASO_G0234608_AD_05	GeneDesign	GTCCCATTCTAGCTTG	16
1075	MAPKAPK5-AS1	MAPKAPK5-AS1	Targeted lncRNA	ASO_G0234608_AD_08	GeneDesign	TCTATACAATCCTGCG	16
1076	MAPKAPK5-AS1	MAPKAPK5-AS1	Targeted lncRNA	ASO_G0234608_AD_09	GeneDesign	TTGACAGACGATTAGT	16
1077	MEG3	MEG3	Targeted lncRNA	ASO_G0214548_01	Exiqon	CTAGTGCCCTCGTGAG	16
1078	MEG3	MEG3	Targeted lncRNA	ASO_G0214548_03	Exiqon	GAACCTGTAGGGCATT	16
1079	MEG3	MEG3	Targeted lncRNA	ASO_G0214548_04	Exiqon	CTCGTGAGGTGTAGA	15
1080	MEG3	MEG3	Targeted lncRNA	ASO_G0214548_05	Exiqon	CTGGGAACCTGTAGGG	16
1081	MEG3	MEG3	Targeted lncRNA	ASO_G0214548_06	Exiqon	CGGTCCTCTTCATCC	15
1082	MEG3	MEG3	Targeted lncRNA	ASO_G0214548_AD_06	GeneDesign	GTGGACGGATGATGTC	16
1083	MEG3	MEG3	Targeted lncRNA	ASO_G0214548_AD_07	GeneDesign	TAGGGCATTGGTTTAAGTC	19
1084	MEG3	MEG3	Targeted lncRNA	ASO_G0214548_AD_08	GeneDesign	AACCGTGCTCCTAGTGC	17
1085	MEG3	MEG3	Targeted lncRNA	ASO_G0214548_AD_09	GeneDesign	TGCTAGCAGGTGAACAC	17
1086	MEG3	MEG3	Targeted lncRNA	ASO_G0214548_AD_10	GeneDesign	GTAAGGATGATTTGACTGA	19
1087	MELTF-AS1	MFI2-AS1	Targeted lncRNA	ASO_G0228109_01	Exiqon	ACGGTCATTCTAGTGA	16
1088	MELTF-AS1	MFI2-AS1	Targeted lncRNA	ASO_G0228109_02	Exiqon	GTGAACGCTCAAAACG	16
1089	MELTF-AS1	MFI2-AS1	Targeted lncRNA	ASO_G0228109_06	Exiqon	GGAAAGAGCGCATCTG	16
1090	MELTF-AS1	MFI2-AS1	Targeted lncRNA	ASO_G0228109_07	Exiqon	ACGGACCTGGGTAATG	16
1091	MELTF-AS1	MFI2-AS1	Targeted lncRNA	ASO_G0228109_09	Exiqon	TAGTAGCTCTTTTAGG	16
1092	MIPEPP3	MIPEPP3	Targeted lncRNA	ASO_G0233325_01	Exiqon	CGTGACCAAGGAGTGC	16
1093	MIPEPP3	MIPEPP3	Targeted lncRNA	ASO_G0233325_02	Exiqon	GAGACAGGAGGTAAGC	16
1094	MIPEPP3	MIPEPP3	Targeted lncRNA	ASO_G0233325_05	Exiqon	GCAGACTTTGGTATGA	16
1095	MIPEPP3	MIPEPP3	Targeted lncRNA	ASO_G0233325_07	Exiqon	CAACACAGGATCTTTA	16
1096	MIPEPP3	MIPEPP3	Targeted lncRNA	ASO_G0233325_08	Exiqon	TGGGACTCAAAGACGT	16
1097	MKLN1-AS	MKLN1-AS2	Targeted lncRNA	ASO_G0236753_01	Exiqon	TTAGGATCAAAGTGTG	16
1098	MKLN1-AS	MKLN1-AS2	Targeted lncRNA	ASO_G0236753_02	Exiqon	GAAAAGTCCTTTGCGC	16
1099	MKLN1-AS	MKLN1-AS2	Targeted lncRNA	ASO_G0236753_03	Exiqon	GACAATAAGCGACATA	16
1100	MKLN1-AS	MKLN1-AS2	Targeted lncRNA	ASO_G0236753_05	Exiqon	CAGCGGAGTCCTCAAG	16
1101	MKLN1-AS	MKLN1-AS2	Targeted lncRNA	ASO_G0236753_06	Exiqon	CGCTTACACCTCAGAC	16
1102	MKLN1-AS	MKLN1-AS2	Targeted lncRNA	ASO_G0236753_AD_01	GeneDesign	AGATTAGTAGGATGCGGC	18
1103	MKLN1-AS	MKLN1-AS2	Targeted lncRNA	ASO_G0236753_AD_02	GeneDesign	ATACCCGAATCTTCTGTC	18
1104	MKLN1-AS	MKLN1-AS2	Targeted lncRNA	ASO_G0236753_AD_05	GeneDesign	CGTGTTTCTGTTCGTAAT	18
1105	MKLN1-AS	MKLN1-AS2	Targeted lncRNA	ASO_G0236753_AD_07	GeneDesign	GACTTATAAACTGGCG	16
1106	MKLN1-AS	MKLN1-AS2	Targeted lncRNA	ASO_G0236753_AD_08	GeneDesign	GTCATTCCCGAGCAAACC	18
1107	MRPS31P5	MRPS31P5	Targeted lncRNA	ASO_G0243406_02	Exiqon	GCTTCCACAGGACAAA	16
1108	MRPS31P5	MRPS31P5	Targeted lncRNA	ASO_G0243406_05	Exiqon	CGGAAACACAAAGCCA	16
1109	MRPS31P5	MRPS31P5	Targeted lncRNA	ASO_G0243406_07	Exiqon	GTAGAAACACCGAGAC	16
1110	MRPS31P5	MRPS31P5	Targeted lncRNA	ASO_G0243406_08	Exiqon	CGAGCAGCGAGTAGCA	16
1111	MRPS31P5	MRPS31P5	Targeted lncRNA	ASO_G0243406_10	Exiqon	CAACCAGGAGCGCAAC	16
1112	NBR2	NBR2	Targeted lncRNA	ASO_G0198496_01	Exiqon	GTGAAGGACCAAACGT	16
1113	NBR2	NBR2	Targeted lncRNA	ASO_G0198496_03	Exiqon	AATAAGCCGCAACTGG	16
1114	NBR2	NBR2	Targeted lncRNA	ASO_G0198496_04	Exiqon	CGCAGGCATGATCGAG	16
1115	NBR2	NBR2	Targeted lncRNA	ASO_G0198496_05	Exiqon	CAATAGGTAGCGATTC	16
1116	NBR2	NBR2	Targeted lncRNA	ASO_G0198496_09	Exiqon	GGGACCTCTTCTTACG	16
1117	NC_A	NC_A	Negative Control	ASO_NC_A	Exiqon	AACACGTCTATACGC	15
1118	NC_B	NC_B	Negative Control	ASO_NC_B	Exiqon	GCTCCCTTCAATCCAA	16
1119	NEAT1	NEAT1_1	Positive Control	ASO_NEAT1_1	Exiqon	GCATGGACAAGTTGAA	16
1120	NEAT1	NEAT1_2	Positive Control	ASO_NEAT1_2	Exiqon	GTGGCATCAACGTTA	15
1121	NNT-AS1	NNT-AS1	Targeted lncRNA	ASO_G0248092_01	Exiqon	TTGACAAGGACTGGCG	16
1122	NNT-AS1	NNT-AS1	Targeted lncRNA	ASO_G0248092_02	Exiqon	GCGATCGGGTGGAGGG	16
1123	NNT-AS1	NNT-AS1	Targeted lncRNA	ASO_G0248092_06	Exiqon	AGGACATCACGCTTTG	16
1124	NNT-AS1	NNT-AS1	Targeted lncRNA	ASO_G0248092_07	Exiqon	TGAGGTCGCCTTTTGG	16
1125	NNT-AS1	NNT-AS1	Targeted lncRNA	ASO_G0248092_09	Exiqon	GCCGAGGCAGAGACAA	16
1126	NNT-AS1	NNT-AS1	Targeted lncRNA	ASO_G0248092_AD_01	GeneDesign	ACCGAATGTACCTTACTT	18
1127	NNT-AS1	NNT-AS1	Targeted lncRNA	ASO_G0248092_AD_04	GeneDesign	GAGTATAACGAACCAGTG	18
1128	NNT-AS1	NNT-AS1	Targeted lncRNA	ASO_G0248092_AD_05	GeneDesign	GATATTCGTACTAGCAGT	18
1129	NNT-AS1	NNT-AS1	Targeted lncRNA	ASO_G0248092_AD_09	GeneDesign	TATGACACGATTAGAGAT	18
1130	NNT-AS1	NNT-AS1	Targeted lncRNA	ASO_G0248092_AD_10	GeneDesign	TCAGCCTATAAGATTCGG	18
1131	NOP14-AS1	NOP14-AS1	Targeted lncRNA	ASO_G0249673_01	Exiqon	TGAGATCCGCAAGCAT	16
1132	NOP14-AS1	NOP14-AS1	Targeted lncRNA	ASO_G0249673_02	Exiqon	GCACCAAACGCAGCAA	16
1133	NOP14-AS1	NOP14-AS1	Targeted lncRNA	ASO_G0249673_04	Exiqon	CAATTCACACCATCTT	16
1134	NOP14-AS1	NOP14-AS1	Targeted lncRNA	ASO_G0249673_06	Exiqon	AATGCACCTCTGGGAT	16
1135	NOP14-AS1	NOP14-AS1	Targeted lncRNA	ASO_G0249673_08	Exiqon	TCGAAGGTTACATCCA	16
1136	NR2F1-AS1	NR2F1-AS1	Targeted lncRNA	ASO_G0237187_01	Exiqon	TGATTGATTGCGGAAT	16
1137	NR2F1-AS1	NR2F1-AS1	Targeted lncRNA	ASO_G0237187_03	Exiqon	GACAGAACTAGTGAAC	16
1138	NR2F1-AS1	NR2F1-AS1	Targeted lncRNA	ASO_G0237187_05	Exiqon	TTGGACCTTGGCATTA	16
1139	NR2F1-AS1	NR2F1-AS1	Targeted lncRNA	ASO_G0237187_06	Exiqon	TAGAGATGAGCTGCAA	16
1140	NR2F1-AS1	NR2F1-AS1	Targeted lncRNA	ASO_G0237187_08	Exiqon	CGCTAGGAATGCTCGA	16
1141	NR2F1-AS1	NR2F1-AS1	Targeted lncRNA	ASO_G0237187_AD_01	GeneDesign	CAACTTAATATACCACGG	18
1142	NR2F1-AS1	NR2F1-AS1	Targeted lncRNA	ASO_G0237187_AD_03	GeneDesign	CGTTTACCTCAGTATGTC	18
1143	NR2F1-AS1	NR2F1-AS1	Targeted lncRNA	ASO_G0237187_AD_05	GeneDesign	GACACTATCGCCCACA	16
1144	NR2F1-AS1	NR2F1-AS1	Targeted lncRNA	ASO_G0237187_AD_07	GeneDesign	GAGCGATAGTAAACCCTG	18
1145	NR2F1-AS1	NR2F1-AS1	Targeted lncRNA	ASO_G0237187_AD_08	GeneDesign	TAACCTACCTAATCATCG	18
1146	OIP5-AS1	OIP5-AS1	Targeted lncRNA	ASO_G0247556_01	Exiqon	TCGGAGGAATTTAGAG	16
1147	OIP5-AS1	OIP5-AS1	Targeted lncRNA	ASO_G0247556_03	Exiqon	TAGTTGGTCATTGGTA	16
1148	OIP5-AS1	OIP5-AS1	Targeted lncRNA	ASO_G0247556_04	Exiqon	CGGGACATAACAAGGA	16
1149	OIP5-AS1	OIP5-AS1	Targeted lncRNA	ASO_G0247556_05	Exiqon	ACGAGCAGGGCTAATA	16
1150	OIP5-AS1	OIP5-AS1	Targeted lncRNA	ASO_G0247556_09	Exiqon	GGATAGTCAAGGTGCT	16
1151	OSER1-DT	OSER1-AS1	Targeted lncRNA	ASO_G0223891_01	Exiqon	AGAGGACCGAGCGCAA	16
1152	OSER1-DT	OSER1-AS1	Targeted lncRNA	ASO_G0223891_02	Exiqon	AAGTTGGTAGACCGGG	16
1153	OSER1-DT	OSER1-AS1	Targeted lncRNA	ASO_G0223891_03	Exiqon	AGCAATGGGCATTTAC	16
1154	OSER1-DT	OSER1-AS1	Targeted lncRNA	ASO_G0223891_08	Exiqon	GAAACTCTGGCCAAGC	16
1155	OSER1-DT	OSER1-AS1	Targeted lncRNA	ASO_G0223891_09	Exiqon	CTCATTGGAGTCCTGT	16
1156	PCAT6	PCAT6	Targeted lncRNA	ASO_G0228288_01	Exiqon	GGATGGACCGAATGAG	16
1157	PCAT6	PCAT6	Targeted lncRNA	ASO_G0228288_02	Exiqon	ATTGAATTGGAGAGAT	16
1158	PCAT6	PCAT6	Targeted lncRNA	ASO_G0228288_04	Exiqon	ACCGAGAGATGGTGAG	16
1159	PCAT6	PCAT6	Targeted lncRNA	ASO_G0228288_05	Exiqon	GTAGAAGCACGAGCAA	16
1160	PCAT6	PCAT6	Targeted lncRNA	ASO_G0228288_09	Exiqon	GAGACGAGAGGATCCA	16
1161	PCAT6	PCAT6	Targeted lncRNA	ASO_G0228288_AD_01	GeneDesign	AAAGTTGTCAGAGGCG	16
1162	PCAT6	PCAT6	Targeted lncRNA	ASO_G0228288_AD_02	GeneDesign	AATGAGGGCGGTTTGG	16
1163	PCAT6	PCAT6	Targeted lncRNA	ASO_G0228288_AD_04	GeneDesign	GAACCCGAACCTGACC	16
1164	PCAT6	PCAT6	Targeted lncRNA	ASO_G0228288_AD_07	GeneDesign	GGACGAGGGAAAGCCG	16
1165	PCAT6	PCAT6	Targeted lncRNA	ASO_G0228288_AD_10	GeneDesign	TGGTAGAAGCACGAGC	16
1166	PITPNA-AS1	PITPNA-AS1	Targeted lncRNA	ASO_G0236618_03	Exiqon	GGCGAAGACAGCACAA	16
1167	PITPNA-AS1	PITPNA-AS1	Targeted lncRNA	ASO_G0236618_05	Exiqon	TGCCTCCTCTTCACAT	16
1168	PITPNA-AS1	PITPNA-AS1	Targeted lncRNA	ASO_G0236618_06	Exiqon	TTGCACATCTGAATTG	16
1169	PITPNA-AS1	PITPNA-AS1	Targeted lncRNA	ASO_G0236618_07	Exiqon	TACCAGGGCAGGATTA	16
1170	PITPNA-AS1	PITPNA-AS1	Targeted lncRNA	ASO_G0236618_09	Exiqon	AATCCTAGACAGAACT	16
1171	PITPNA-AS1	PITPNA-AS1	Targeted lncRNA	ASO_G0236618_AD_01	GeneDesign	ACGGCTAATTCTGTAGGA	18
1172	PITPNA-AS1	PITPNA-AS1	Targeted lncRNA	ASO_G0236618_AD_03	GeneDesign	CGACCCTCGTTTGACC	16
1173	PITPNA-AS1	PITPNA-AS1	Targeted lncRNA	ASO_G0236618_AD_05	GeneDesign	CGTCCCATATGCAATAGG	18
1174	PITPNA-AS1	PITPNA-AS1	Targeted lncRNA	ASO_G0236618_AD_07	GeneDesign	GCATATAATAGTCCCG	16
1175	PITPNA-AS1	PITPNA-AS1	Targeted lncRNA	ASO_G0236618_AD_09	GeneDesign	GTGGAGAACGGAGGCG	16
1176	PRRT3-AS1	PRRT3-AS1	Targeted lncRNA	ASO_G0230082_01	Exiqon	CGTATGAATGGAGTAG	16
1177	PRRT3-AS1	PRRT3-AS1	Targeted lncRNA	ASO_G0230082_03	Exiqon	ACTAGATCAATTGGGT	16
1178	PRRT3-AS1	PRRT3-AS1	Targeted lncRNA	ASO_G0230082_04	Exiqon	GCTGGTGCATGGTGTA	16
1179	PRRT3-AS1	PRRT3-AS1	Targeted lncRNA	ASO_G0230082_05	Exiqon	GGGCACCGGGCTAAAC	16
1180	PRRT3-AS1	PRRT3-AS1	Targeted lncRNA	ASO_G0230082_06	Exiqon	TTACGGCTCGCAGGCG	16
1181	PRRT3-AS1	PRRT3-AS1	Targeted lncRNA	ASO_G0230082_AD_01	GeneDesign	ACTCTGATGTCCGCCACG	18
1182	PRRT3-AS1	PRRT3-AS1	Targeted lncRNA	ASO_G0230082_AD_03	GeneDesign	ATGTGTCGAACTGCTG	16
1183	PRRT3-AS1	PRRT3-AS1	Targeted lncRNA	ASO_G0230082_AD_08	GeneDesign	GACCTTCCTGACGCTA	16
1184	PRRT3-AS1	PRRT3-AS1	Targeted lncRNA	ASO_G0230082_AD_09	GeneDesign	TAACCCGAGATGGACC	16
1185	PRRT3-AS1	PRRT3-AS1	Targeted lncRNA	ASO_G0230082_AD_10	GeneDesign	TATGAACCTCGCCCATAC	18
1186	PRRX1	PRRX1	Positive Control	ASO_G0116132_POS_01	Exiqon	CGAATCAACACCAAACGC	18
1187	PRRX1	PRRX1	Positive Control	ASO_G0116132_POS_04	Exiqon	CGTCCAGTCAATTCTTG	17
1188	PRRX1	PRRX1	Positive Control	ASO_G0116132_POS_07	Exiqon	CACACATCGTCTCAACA	17
1189	PRRX1	PRRX1	Positive Control	ASO_G0116132_POS_08	Exiqon	GACCAGACTACACCTAA	17
1190	PRRX1	PRRX1	Positive Control	ASO_G0116132_POS_09	Exiqon	GAACGGATAGATGACTA	17
1191	PSMG3-AS1	PSMG3-AS1	Targeted lncRNA	ASO_G0230487_01	Exiqon	AACAGAAATCATCGTA	16
1192	PSMG3-AS1	PSMG3-AS1	Targeted lncRNA	ASO_G0230487_02	Exiqon	GGGATGCTCCGTAAAT	16
1193	PSMG3-AS1	PSMG3-AS1	Targeted lncRNA	ASO_G0230487_03	Exiqon	AAAACCGTTACTTCAC	16
1194	PSMG3-AS1	PSMG3-AS1	Targeted lncRNA	ASO_G0230487_04	Exiqon	TTTAATTCAATCCAGT	16
1195	PSMG3-AS1	PSMG3-AS1	Targeted lncRNA	ASO_G0230487_05	Exiqon	TCCGCCAAGCTTCAGA	16
1196	PTCHD3P1	PTCHD3P1	Targeted lncRNA	ASO_G0224597_01	Exiqon	TTGATAGCTGAAGTGT	16
1197	PTCHD3P1	PTCHD3P1	Targeted lncRNA	ASO_G0224597_02	Exiqon	AGTAAGAGTGAAGAAC	16
1198	PTCHD3P1	PTCHD3P1	Targeted lncRNA	ASO_G0224597_03	Exiqon	CAGACACTGATCTTCA	16
1199	PTCHD3P1	PTCHD3P1	Targeted lncRNA	ASO_G0224597_05	Exiqon	AACATTGCAGTCGATA	16
1200	PTCHD3P1	PTCHD3P1	Targeted lncRNA	ASO_G0224597_06	Exiqon	GCACTTTACCCTCTTA	16
1201	PTCHD3P1	PTCHD3P1	Targeted lncRNA	ASO_G0224597_AD_01	GeneDesign	TTAACACTAGATAGGGT	17
1202	PTCHD3P1	PTCHD3P1	Targeted lncRNA	ASO_G0224597_AD_02	GeneDesign	CGGGAAAGTTACGTCT	16
1203	PTCHD3P1	PTCHD3P1	Targeted lncRNA	ASO_G0224597_AD_03	GeneDesign	CTTGGCGGGTCAACTG	16
1204	PTCHD3P1	PTCHD3P1	Targeted lncRNA	ASO_G0224597_AD_04	GeneDesign	GATGGAGTAATTTAGTAGG	19
1205	PTCHD3P1	PTCHD3P1	Targeted lncRNA	ASO_G0224597_AD_07	GeneDesign	CGCGAGGTACAAGATGC	17
1206	PTPRG-AS1	PTPRG-AS1	Targeted lncRNA	ASO_G0241472_02	Exiqon	CAAATTCTAGTGGTGG	16
1207	PTPRG-AS1	PTPRG-AS1	Targeted lncRNA	ASO_G0241472_04	Exiqon	TCAGCAAAGCAGAGAC	16
1208	PTPRG-AS1	PTPRG-AS1	Targeted lncRNA	ASO_G0241472_05	Exiqon	GCTTCTGTCAAAAGTG	16
1209	PTPRG-AS1	PTPRG-AS1	Targeted lncRNA	ASO_G0241472_07	Exiqon	ACCTCCTGGTTGCCGC	16
1210	PTPRG-AS1	PTPRG-AS1	Targeted lncRNA	ASO_G0241472_10	Exiqon	CCGGTTGCTGAGGATA	16
1211	PXN-AS1	PXN-AS1	Targeted lncRNA	ASO_G0255857_01	Exiqon	AGTGCCGGAAACGAT	15
1212	PXN-AS1	PXN-AS1	Targeted lncRNA	ASO_G0255857_02	Exiqon	TGTCCGGATTTGCGT	15
1213	PXN-AS1	PXN-AS1	Targeted lncRNA	ASO_G0255857_04	Exiqon	GCTTCTTCGAGCACGA	16
1214	PXN-AS1	PXN-AS1	Targeted lncRNA	ASO_G0255857_06	Exiqon	AGCAAGCTCCTCCAAC	16
1215	PXN-AS1	PXN-AS1	Targeted lncRNA	ASO_G0255857_09	Exiqon	TGCCTCCTCGTCGTCA	16
1216	RAB30-DT	RAB30-AS1	Targeted lncRNA	ASO_G0246067_01	Exiqon	TGACGCAAAGTAACTA	16
1217	RAB30-DT	RAB30-AS1	Targeted lncRNA	ASO_G0246067_02	Exiqon	GTTGGAAAACAAACGG	16
1218	RAB30-DT	RAB30-AS1	Targeted lncRNA	ASO_G0246067_03	Exiqon	TGAACCACCACTTGAC	16
1219	RAB30-DT	RAB30-AS1	Targeted lncRNA	ASO_G0246067_04	Exiqon	GTGAATCTGAAGCTTT	16
1220	RAB30-DT	RAB30-AS1	Targeted lncRNA	ASO_G0246067_05	Exiqon	TTCGCTGGTTGGTAAA	16
1221	RAB30-DT	RAB30-AS1	Targeted lncRNA	ASO_G0246067_AD_03	GeneDesign	CCGACCAGATCGTCCT	16
1222	RAB30-DT	RAB30-AS1	Targeted lncRNA	ASO_G0246067_AD_04	GeneDesign	TACAGGTTAGTCAGGATAT	19
1223	RAB30-DT	RAB30-AS1	Targeted lncRNA	ASO_G0246067_AD_06	GeneDesign	TGTAGAGACGGTACGG	16
1224	RAB30-DT	RAB30-AS1	Targeted lncRNA	ASO_G0246067_AD_09	GeneDesign	ATGACGCAAAGTAACTA	17
1225	RAB30-DT	RAB30-AS1	Targeted lncRNA	ASO_G0246067_AD_10	GeneDesign	TCTCCGAATAAAGGCGA	17
1226	RAD51-AS1	RAD51-AS1	Targeted lncRNA	ASO_G0245849_01	Exiqon	CGTGGTCTTCGATGCA	16
1227	RAD51-AS1	RAD51-AS1	Targeted lncRNA	ASO_G0245849_02	Exiqon	CTCTTGATTTTGACGC	16
1228	RAD51-AS1	RAD51-AS1	Targeted lncRNA	ASO_G0245849_05	Exiqon	ACTTGCTCCAGGAATG	16
1229	RAD51-AS1	RAD51-AS1	Targeted lncRNA	ASO_G0245849_06	Exiqon	CAGGAATGCGAGTAGG	16
1230	RAD51-AS1	RAD51-AS1	Targeted lncRNA	ASO_G0245849_07	Exiqon	CCGTCTTGGGTTAGCG	16
1231	RAD51-AS1	RAD51-AS1	Targeted lncRNA	ASO_G0245849_AD_03	GeneDesign	CGACGCATTACCTCTTGG	18
1232	RAD51-AS1	RAD51-AS1	Targeted lncRNA	ASO_G0245849_AD_05	GeneDesign	GAATCCCTACTCAGCTAG	18
1233	RAD51-AS1	RAD51-AS1	Targeted lncRNA	ASO_G0245849_AD_06	GeneDesign	GAATTAGTCCTTACGCAA	18
1234	RAD51-AS1	RAD51-AS1	Targeted lncRNA	ASO_G0245849_AD_07	GeneDesign	GCACCACAGATTGACGAA	18
1235	RAD51-AS1	RAD51-AS1	Targeted lncRNA	ASO_G0245849_AD_09	GeneDesign	TAACCTTCCAGTTTCGGC	18
1236	RASSF8-AS1	RASSF8-AS1	Targeted lncRNA	ASO_G0246695_01	Exiqon	GACATTTGGTGTGATC	16
1237	RASSF8-AS1	RASSF8-AS1	Targeted lncRNA	ASO_G0246695_02	Exiqon	GAACGGCTCTTTTTGA	16
1238	RASSF8-AS1	RASSF8-AS1	Targeted lncRNA	ASO_G0246695_04	Exiqon	GGCAAAGGTGGAGTTG	16
1239	RASSF8-AS1	RASSF8-AS1	Targeted lncRNA	ASO_G0246695_06	Exiqon	TCAGGAAGGCTTAACA	16
1240	RASSF8-AS1	RASSF8-AS1	Targeted lncRNA	ASO_G0246695_07	Exiqon	ACCACAGGTCCTCTAT	16
1241	RP1-152L7.5	RP1-152L7.5	Targeted lncRNA	ASO_G0216775_01	Exiqon	GTGAGACGAACGGTAG	16
1242	RP1-152L7.5	RP1-152L7.5	Targeted lncRNA	ASO_G0216775_02	Exiqon	TGCACTCGTCACAGGT	16
1243	RP1-152L7.5	RP1-152L7.5	Targeted lncRNA	ASO_G0216775_03	Exiqon	ATGAGCTAAGTCTAGT	16
1244	RP1-152L7.5	RP1-152L7.5	Targeted lncRNA	ASO_G0216775_05	Exiqon	AACATTTTAGCATCGT	16
1245	RP1-152L7.5	RP1-152L7.5	Targeted lncRNA	ASO_G0216775_07	Exiqon	CGAGAAGTCTTACGAC	16
1246	ERICH6-AS1	RP11-103G8.2	Targeted lncRNA	ASO_G0240137_01	Exiqon	TCAATGAGATCTGATG	16
1247	ERICH6-AS1	RP11-103G8.2	Targeted lncRNA	ASO_G0240137_04	Exiqon	ATGGTGCTGTGACTCT	16
1248	ERICH6-AS1	RP11-103G8.2	Targeted lncRNA	ASO_G0240137_05	Exiqon	GCCTCTTTAGATCAGT	16
1249	ERICH6-AS1	RP11-103G8.2	Targeted lncRNA	ASO_G0240137_06	Exiqon	TTCACCTCATAGAAGT	16
1250	ERICH6-AS1	RP11-103G8.2	Targeted lncRNA	ASO_G0240137_09	Exiqon	AAATCCGGGAGGCTCG	16
1251	RP11-10K16.1	RP11-10K16.1	Targeted lncRNA	ASO_G0245213_01	Exiqon	AGCGACCGGCAACTTG	16
1252	RP11-10K16.1	RP11-10K16.1	Targeted lncRNA	ASO_G0245213_02	Exiqon	CGTGAACAAGGTTGGT	16
1253	RP11-10K16.1	RP11-10K16.1	Targeted lncRNA	ASO_G0245213_03	Exiqon	GAATTACACACTCTAG	16
1254	RP11-10K16.1	RP11-10K16.1	Targeted lncRNA	ASO_G0245213_04	Exiqon	GAAATGGTGCATTCGC	16
1255	RP11-10K16.1	RP11-10K16.1	Targeted lncRNA	ASO_G0245213_06	Exiqon	TGAGCTCCTCCAATCC	16
1256	RP11-10K16.1	RP11-10K16.1	Targeted lncRNA	ASO_G0245213_AD_02	GeneDesign	AAAGCCTCTCGACAAG	16
1257	RP11-10K16.1	RP11-10K16.1	Targeted lncRNA	ASO_G0245213_AD_03	GeneDesign	AGTACGAGGCAGATTG	16
1258	RP11-10K16.1	RP11-10K16.1	Targeted lncRNA	ASO_G0245213_AD_04	GeneDesign	ATAAGACGACAGCCTT	16
1259	RP11-10K16.1	RP11-10K16.1	Targeted lncRNA	ASO_G0245213_AD_05	GeneDesign	ATTGGGTTCATCTTACGC	18
1260	RP11-10K16.1	RP11-10K16.1	Targeted lncRNA	ASO_G0245213_AD_10	GeneDesign	GTTAAGGACGGAGTTA	16
1261	RP11-110G21.1	RP11-110G21.1	Targeted lncRNA	ASO_G0228801_01	Exiqon	GTAGAGGATGATTTGA	16
1262	RP11-110G21.1	RP11-110G21.1	Targeted lncRNA	ASO_G0228801_02	Exiqon	TCTGTGGACTGATCTT	16
1263	RP11-110G21.1	RP11-110G21.1	Targeted lncRNA	ASO_G0228801_03	Exiqon	GACTTTTAACAACGAG	16
1264	RP11-110G21.1	RP11-110G21.1	Targeted lncRNA	ASO_G0228801_07	Exiqon	AGACCAGCTTCACTAG	16
1265	RP11-110G21.1	RP11-110G21.1	Targeted lncRNA	ASO_G0228801_08	Exiqon	GGTCTAGTAACACTTC	16
1266	CCDC84-DT	RP11-110I1.12	Targeted lncRNA	ASO_G0255121_01	Exiqon	TCGGATAACTTAAGGT	16
1267	CCDC84-DT	RP11-110I1.12	Targeted lncRNA	ASO_G0255121_02	Exiqon	TTAGACGTTACTAGAA	16
1268	CCDC84-DT	RP11-110I1.12	Targeted lncRNA	ASO_G0255121_03	Exiqon	GAGATCCAATGACGAA	16
1269	CCDC84-DT	RP11-110I1.12	Targeted lncRNA	ASO_G0255121_04	Exiqon	GGTGGTTAACGTAAAG	16
1270	CCDC84-DT	RP11-110I1.12	Targeted lncRNA	ASO_G0255121_08	Exiqon	TGCGTTACTGACAAGT	16
1271	RP11-111M22.3	RP11-111M22.3	Targeted lncRNA	ASO_G0255135_01	Exiqon	TCGAAGAAACTCGATC	16
1272	RP11-111M22.3	RP11-111M22.3	Targeted lncRNA	ASO_G0255135_02	Exiqon	TCCTAATCCTCGACG	15
1273	RP11-111M22.3	RP11-111M22.3	Targeted lncRNA	ASO_G0255135_03	Exiqon	TTACTTGCAACAACTC	16
1274	RP11-111M22.3	RP11-111M22.3	Targeted lncRNA	ASO_G0255135_04	Exiqon	CTAGAGGCCACTAATA	16
1275	RP11-111M22.3	RP11-111M22.3	Targeted lncRNA	ASO_G0255135_08	Exiqon	GGCCTCAAATAAATTC	16
1276	RP11-115C21.2	RP11-115C21.2	Targeted lncRNA	ASO_G0246089_01	Exiqon	CTGAACAGTAACGTGG	16
1277	RP11-115C21.2	RP11-115C21.2	Targeted lncRNA	ASO_G0246089_02	Exiqon	CTGGTGATAATGATAA	16
1278	RP11-115C21.2	RP11-115C21.2	Targeted lncRNA	ASO_G0246089_03	Exiqon	CTGAGAGTGAATGAAT	16
1279	RP11-115C21.2	RP11-115C21.2	Targeted lncRNA	ASO_G0246089_04	Exiqon	TGAGTAGACGGTAGTC	16
1280	RP11-115C21.2	RP11-115C21.2	Targeted lncRNA	ASO_G0246089_06	Exiqon	TAGAAGGCTAATTCAG	16
1281	RP11-115C21.2	RP11-115C21.2	Targeted lncRNA	ASO_G0246089_AD_02	GeneDesign	AGACCTGAGTAGACGG	16
1282	RP11-115C21.2	RP11-115C21.2	Targeted lncRNA	ASO_G0246089_AD_03	GeneDesign	AGTCCGCACAAAGCCGTC	18
1283	RP11-115C21.2	RP11-115C21.2	Targeted lncRNA	ASO_G0246089_AD_04	GeneDesign	CCGAAAGTCCGCACAA	16
1284	RP11-115C21.2	RP11-115C21.2	Targeted lncRNA	ASO_G0246089_AD_08	GeneDesign	CGGGACAGTGGGTAGT	16
1285	RP11-115C21.2	RP11-115C21.2	Targeted lncRNA	ASO_G0246089_AD_10	GeneDesign	GATCCGAAGTCTCTTT	16
1286	PPP3CB-AS1	RP11-137L10.6	Targeted lncRNA	ASO_G0221817_01	Exiqon	GGTAGCTAAATCGTTA	16
1287	PPP3CB-AS1	RP11-137L10.6	Targeted lncRNA	ASO_G0221817_03	Exiqon	GCCAGAACAGTGCGTA	16
1288	PPP3CB-AS1	RP11-137L10.6	Targeted lncRNA	ASO_G0221817_04	Exiqon	GAATCGTTGGGCAACA	16
1289	PPP3CB-AS1	RP11-137L10.6	Targeted lncRNA	ASO_G0221817_06	Exiqon	GCAGAGAATTTACGTC	16
1290	PPP3CB-AS1	RP11-137L10.6	Targeted lncRNA	ASO_G0221817_07	Exiqon	TCAGGATTAGAATCGT	16
1291	PPP3CB-AS1	RP11-137L10.6	Targeted lncRNA	ASO_G0221817_AD_02	GeneDesign	CGAAGAGTAGATATGCCC	18
1292	PPP3CB-AS1	RP11-137L10.6	Targeted lncRNA	ASO_G0221817_AD_03	GeneDesign	CGCCTAAATTGCTCTAGC	18
1293	PPP3CB-AS1	RP11-137L10.6	Targeted lncRNA	ASO_G0221817_AD_04	GeneDesign	CGGACTACTACTTACTTA	18
1294	PPP3CB-AS1	RP11-137L10.6	Targeted lncRNA	ASO_G0221817_AD_08	GeneDesign	TCGATGTATTTGAGACCC	18
1295	PPP3CB-AS1	RP11-137L10.6	Targeted lncRNA	ASO_G0221817_AD_10	GeneDesign	TGCTTCAAAGTCGTGC	16
1296	RP11-1398P2.1	RP11-1398P2.1	Targeted lncRNA	ASO_G0244459_01	Exiqon	CCAACGCCGCGAGACG	16
1297	RP11-1398P2.1	RP11-1398P2.1	Targeted lncRNA	ASO_G0244459_02	Exiqon	TCACTTCCGAATAATG	16
1298	RP11-1398P2.1	RP11-1398P2.1	Targeted lncRNA	ASO_G0244459_04	Exiqon	CGCTGTCATCCGTCG	15
1299	RP11-1398P2.1	RP11-1398P2.1	Targeted lncRNA	ASO_G0244459_05	Exiqon	AATTCATGGTCCCTGT	16
1300	RP11-1398P2.1	RP11-1398P2.1	Targeted lncRNA	ASO_G0244459_06	Exiqon	GGACATCCAGCACGTT	16
1301	PIGBOS1	RP11-139H15.1	Targeted lncRNA	ASO_G0225973_01	Exiqon	TCTGATCTTTGGCATA	16
1302	PIGBOS1	RP11-139H15.1	Targeted lncRNA	ASO_G0225973_06	Exiqon	CACGTCACTAAACTCG	16
1303	PIGBOS1	RP11-139H15.1	Targeted lncRNA	ASO_G0225973_08	Exiqon	CCAGGCCTAACTCCAT	16
1304	PIGBOS1	RP11-139H15.1	Targeted lncRNA	ASO_G0225973_09	Exiqon	CAAAGGCGAGTAGCAA	16
1305	PIGBOS1	RP11-139H15.1	Targeted lncRNA	ASO_G0225973_10	Exiqon	GCAATTCCAAGGACAG	16
1306	PIGBOS1	RP11-139H15.1	Targeted lncRNA	ASO_G0225973_AD_01	GeneDesign	AATAGGAACCATTCGG	16
1307	PIGBOS1	RP11-139H15.1	Targeted lncRNA	ASO_G0225973_AD_02	GeneDesign	ACGTCGGGTGGGAGCT	16
1308	PIGBOS1	RP11-139H15.1	Targeted lncRNA	ASO_G0225973_AD_03	GeneDesign	ATTACCGTTACCGTTT	16
1309	PIGBOS1	RP11-139H15.1	Targeted lncRNA	ASO_G0225973_AD_05	GeneDesign	CTGCCTACCTCGTTGA	16
1310	PIGBOS1	RP11-139H15.1	Targeted lncRNA	ASO_G0225973_AD_06	GeneDesign	GTGAGAGCAACGAACC	16
1311	RP11-149I23.3	RP11-149I23.3	Targeted lncRNA	ASO_G0232110_04	Exiqon	ACACTGTAAAAGAAGT	16
1312	RP11-149I23.3	RP11-149I23.3	Targeted lncRNA	ASO_G0232110_05	Exiqon	CTCTTCCATGCAATGA	16
1313	RP11-149I23.3	RP11-149I23.3	Targeted lncRNA	ASO_G0232110_06	Exiqon	AGATTCAGAGGAAAGG	16
1314	RP11-149I23.3	RP11-149I23.3	Targeted lncRNA	ASO_G0232110_07	Exiqon	ACAAACAACATAACTA	16
1315	RP11-149I23.3	RP11-149I23.3	Targeted lncRNA	ASO_G0232110_10	Exiqon	CTTGGAACAAAGAGCA	16
1316	RP11-149I23.3	RP11-149I23.3	Targeted lncRNA	ASO_G0232110_AD_01	GeneDesign	AACACATCTCCCGTAT	16
1317	RP11-149I23.3	RP11-149I23.3	Targeted lncRNA	ASO_G0232110_AD_02	GeneDesign	AGTCAAAGGCGGATGT	16
1318	RP11-149I23.3	RP11-149I23.3	Targeted lncRNA	ASO_G0232110_AD_03	GeneDesign	AGTCGGGTGTGAGTTG	16
1319	RP11-149I23.3	RP11-149I23.3	Targeted lncRNA	ASO_G0232110_AD_04	GeneDesign	CCGTTCAAACAGAGAC	16
1320	RP11-149I23.3	RP11-149I23.3	Targeted lncRNA	ASO_G0232110_AD_06	GeneDesign	CGCTTATACTTGCTGG	16
1321	LINC01605	RP11-150O12.1	Targeted lncRNA	ASO_C013368_01	Exiqon	ACTTAAGGACGGTAGA	16
1322	LINC01605	RP11-150O12.1	Targeted lncRNA	ASO_C013368_02	Exiqon	CGGTAGGAAGGTCGGC	16
1323	LINC01605	RP11-150O12.1	Targeted lncRNA	ASO_C013368_03	Exiqon	AGAACATTGGTTAGC	15
1324	LINC01605	RP11-150O12.1	Targeted lncRNA	ASO_C013368_04	Exiqon	GTAACGGGAATGAGTT	16
1325	LINC01605	RP11-150O12.1	Targeted lncRNA	ASO_C013368_06	Exiqon	TTAAATGAGGTCGTAT	16
1326	LINC01605	RP11-150O12.1	Targeted lncRNA	ASO_G0253161_01	Exiqon	CGGTAGGAAGGTCGGC	16
1327	LINC01605	RP11-150O12.1	Targeted lncRNA	ASO_G0253161_02	Exiqon	ATTACTGACAGAGCTT	16
1328	LINC01605	RP11-150O12.1	Targeted lncRNA	ASO_G0253161_03	Exiqon	TAACGGGAATGAGTTG	16
1329	LINC01605	RP11-150O12.1	Targeted lncRNA	ASO_G0253161_04	Exiqon	TCTGGTCTTACTCAGT	16
1330	LINC01605	RP11-150O12.1	Targeted lncRNA	ASO_G0253161_05	Exiqon	AGCAGCTTGAATAGTG	16
1331	LINC01605	RP11-150O12.1	Targeted lncRNA	ASO_G0253161_AD_03	GeneDesign	TATTGGTCTGTGCACGT	17
1332	LINC01605	RP11-150O12.1	Targeted lncRNA	ASO_G0253161_AD_04	GeneDesign	TATGGGTTGGCGTTCT	16
1333	LINC01605	RP11-150O12.1	Targeted lncRNA	ASO_G0253161_AD_05	GeneDesign	TGCGAAGTTTATAGTG	16
1334	LINC01605	RP11-150O12.1	Targeted lncRNA	ASO_G0253161_AD_07	GeneDesign	TATAGTGGGTAATTAG	16
1335	LINC01605	RP11-150O12.1	Targeted lncRNA	ASO_G0253161_AD_08	GeneDesign	TACTTATTCAAGCCTATAC	19
1336	RP11-160O5.1	RP11-160O5.1	Targeted lncRNA	ASO_G0263470_02	Exiqon	GTAACATCAGATTCAT	16
1337	RP11-160O5.1	RP11-160O5.1	Targeted lncRNA	ASO_G0263470_03	Exiqon	CAAGGTAATTCATCAC	16
1338	RP11-160O5.1	RP11-160O5.1	Targeted lncRNA	ASO_G0263470_04	Exiqon	TTCATCACATTAGTAG	16
1339	RP11-160O5.1	RP11-160O5.1	Targeted lncRNA	ASO_G0263470_05	Exiqon	CTGGGTGGTCGACGG	15
1340	RP11-160O5.1	RP11-160O5.1	Targeted lncRNA	ASO_G0263470_06	Exiqon	CACTAGGCGCCTCCAA	16
1341	LMO7-AS1	RP11-173B14.5	Targeted lncRNA	ASO_G0261105_02	Exiqon	GATTGGTAGAGGCTTT	16
1342	LMO7-AS1	RP11-173B14.5	Targeted lncRNA	ASO_G0261105_03	Exiqon	CAGCTAAGCATTCAAT	16
1343	LMO7-AS1	RP11-173B14.5	Targeted lncRNA	ASO_G0261105_04	Exiqon	AGGTCACTTGCATAAC	16
1344	LMO7-AS1	RP11-173B14.5	Targeted lncRNA	ASO_G0261105_08	Exiqon	GATGGGCGGAAGCCAT	16
1345	LMO7-AS1	RP11-173B14.5	Targeted lncRNA	ASO_G0261105_10	Exiqon	GGAAGTTGAAAGCACA	16
1346	LMO7-AS1	RP11-173B14.5	Targeted lncRNA	ASO_G0261105_AD_02	GeneDesign	ATTCGTTGTAGTGTTCAG	18
1347	LMO7-AS1	RP11-173B14.5	Targeted lncRNA	ASO_G0261105_AD_05	GeneDesign	GTACGGTCTAAAGCTATT	18
1348	LMO7-AS1	RP11-173B14.5	Targeted lncRNA	ASO_G0261105_AD_06	GeneDesign	TAAGAGTAGTAAGGCG	16
1349	LMO7-AS1	RP11-173B14.5	Targeted lncRNA	ASO_G0261105_AD_08	GeneDesign	TATCCGACCCAGATTGTC	18
1350	LMO7-AS1	RP11-173B14.5	Targeted lncRNA	ASO_G0261105_AD_10	GeneDesign	TTGAATAGCCGACAAGAG	18
1351	RP11-195F19.9	RP11-195F19.9	Targeted lncRNA	ASO_G0230074_02	Exiqon	AGGTAATGCTGTAATA	16
1352	RP11-195F19.9	RP11-195F19.9	Targeted lncRNA	ASO_G0230074_03	Exiqon	ACCTAACGTCTTGATG	16
1353	RP11-195F19.9	RP11-195F19.9	Targeted lncRNA	ASO_G0230074_04	Exiqon	TCCAACATTCAAGGGC	16
1354	RP11-195F19.9	RP11-195F19.9	Targeted lncRNA	ASO_G0230074_05	Exiqon	CGGGAATGAGGAGATA	16
1355	RP11-195F19.9	RP11-195F19.9	Targeted lncRNA	ASO_G0230074_07	Exiqon	GATTCAATCATGCCGC	16
1356	RP11-206L10.2	RP11-206L10.2	Targeted lncRNA	ASO_G0228327_01	Exiqon	CCGCGCCAGACATAGT	16
1357	RP11-206L10.2	RP11-206L10.2	Targeted lncRNA	ASO_G0228327_02	Exiqon	TCACTCTTACCAGTCC	16
1358	RP11-206L10.2	RP11-206L10.2	Targeted lncRNA	ASO_G0228327_03	Exiqon	ACACACAGAACCTGGC	16
1359	RP11-206L10.2	RP11-206L10.2	Targeted lncRNA	ASO_G0228327_08	Exiqon	ATCAGGAGTCGAGGCG	16
1360	RP11-206L10.2	RP11-206L10.2	Targeted lncRNA	ASO_G0228327_10	Exiqon	TGTAGCCGAACACCCG	16
1361	NINJ2-AS1	RP11-218M22.1	Targeted lncRNA	ASO_G0177406_01	Exiqon	ATTAAGAAGATCGAGT	16
1362	NINJ2-AS1	RP11-218M22.1	Targeted lncRNA	ASO_G0177406_02	Exiqon	CGCCGCTAAGAACAAA	16
1363	NINJ2-AS1	RP11-218M22.1	Targeted lncRNA	ASO_G0177406_05	Exiqon	ATAACGTCTAACGGT	15
1364	NINJ2-AS1	RP11-218M22.1	Targeted lncRNA	ASO_G0177406_08	Exiqon	TCGTGATTTGAATTTT	16
1365	NINJ2-AS1	RP11-218M22.1	Targeted lncRNA	ASO_G0177406_10	Exiqon	GTCTTGGGAGGATTAA	16
1366	RP11-220I1.1	RP11-220I1.1	Targeted lncRNA	ASO_G0233137_01	Exiqon	ACCAAAACGCGTAGAG	16
1367	RP11-220I1.1	RP11-220I1.1	Targeted lncRNA	ASO_G0233137_02	Exiqon	CCAAGTTGATGATCTA	16
1368	RP11-220I1.1	RP11-220I1.1	Targeted lncRNA	ASO_G0233137_04	Exiqon	GGCTTAGGAAAGAGTA	16
1369	RP11-220I1.1	RP11-220I1.1	Targeted lncRNA	ASO_G0233137_05	Exiqon	CTGAATGAGTGGAAGT	16
1370	RP11-220I1.1	RP11-220I1.1	Targeted lncRNA	ASO_G0233137_07	Exiqon	AGACTCCACTGCCAAA	16
1371	LINC02454	RP11-221N13.3	Targeted lncRNA	ASO_G0256268_01	Exiqon	AGTAGCTGTAGAATTT	16
1372	LINC02454	RP11-221N13.3	Targeted lncRNA	ASO_G0256268_02	Exiqon	AAAGCGGCATTTGGTA	16
1373	LINC02454	RP11-221N13.3	Targeted lncRNA	ASO_G0256268_03	Exiqon	TCTGAGTGGTGACTAT	16
1374	LINC02454	RP11-221N13.3	Targeted lncRNA	ASO_G0256268_05	Exiqon	ACAATTGCCATGAAGA	16
1375	LINC02454	RP11-221N13.3	Targeted lncRNA	ASO_G0256268_06	Exiqon	ATGCACAGCCACTTC	15
1376	LINC02454	RP11-221N13.3	Targeted lncRNA	ASO_G0256268_AD_01	GeneDesign	GCAGTGTATGTGAGAATGT	19
1377	LINC02454	RP11-221N13.3	Targeted lncRNA	ASO_G0256268_AD_03	GeneDesign	AGCCTGAAAGGCATGACCT	19
1378	LINC02454	RP11-221N13.3	Targeted lncRNA	ASO_G0256268_AD_05	GeneDesign	GACGATGGCTCTATCAT	17
1379	LINC02454	RP11-221N13.3	Targeted lncRNA	ASO_G0256268_AD_06	GeneDesign	GTGACACAATTGCCATG	17
1380	LINC02454	RP11-221N13.3	Targeted lncRNA	ASO_G0256268_AD_07	GeneDesign	AAGCAGTACACACCGG	16
1381	ATP2A1-AS1	RP11-22P6.3	Targeted lncRNA	ASO_G0260442_01	Exiqon	TCGTAAGTGTGGGAGG	16
1382	ATP2A1-AS1	RP11-22P6.3	Targeted lncRNA	ASO_G0260442_02	Exiqon	ACAAAGTCTTGGGTGT	16
1383	ATP2A1-AS1	RP11-22P6.3	Targeted lncRNA	ASO_G0260442_04	Exiqon	TTAATGGGATGAACTT	16
1384	ATP2A1-AS1	RP11-22P6.3	Targeted lncRNA	ASO_G0260442_06	Exiqon	GTGATTCGCGTCCTC	15
1385	ATP2A1-AS1	RP11-22P6.3	Targeted lncRNA	ASO_G0260442_08	Exiqon	CGAGTCCCGAGCATCC	16
1386	ATP2A1-AS1	RP11-22P6.3	Targeted lncRNA	ASO_G0260442_AD_01	GeneDesign	AACCCTTGAACTGCCC	16
1387	ATP2A1-AS1	RP11-22P6.3	Targeted lncRNA	ASO_G0260442_AD_02	GeneDesign	ACTAGACCTTAACCCG	16
1388	ATP2A1-AS1	RP11-22P6.3	Targeted lncRNA	ASO_G0260442_AD_07	GeneDesign	GTTACCCACCCGAACT	16
1389	ATP2A1-AS1	RP11-22P6.3	Targeted lncRNA	ASO_G0260442_AD_08	GeneDesign	GTTAGAGTCCTGTCCG	16
1390	ATP2A1-AS1	RP11-22P6.3	Targeted lncRNA	ASO_G0260442_AD_10	GeneDesign	TGGGATCGGGCGAATG	16
1391	RP11-242D8.1	RP11-242D8.1	Targeted lncRNA	ASO_G0267002_02	Exiqon	TACGGCATAAAAACTC	16
1392	RP11-242D8.1	RP11-242D8.1	Targeted lncRNA	ASO_G0267002_03	Exiqon	TTCTTGATTCTGGTGT	16
1393	RP11-242D8.1	RP11-242D8.1	Targeted lncRNA	ASO_G0267002_05	Exiqon	GATGGTCAGCAATAGC	16
1394	RP11-242D8.1	RP11-242D8.1	Targeted lncRNA	ASO_G0267002_08	Exiqon	CGCCCTCAGGATCCGT	16
1395	RP11-242D8.1	RP11-242D8.1	Targeted lncRNA	ASO_G0267002_09	Exiqon	CCAACGCGGCCTTAGC	16
1396	LINC01204	RP11-245M24.1	Targeted lncRNA	ASO_G0229563_02	Exiqon	TCAGAACCAAGGTAGA	16
1397	LINC01204	RP11-245M24.1	Targeted lncRNA	ASO_G0229563_03	Exiqon	ATGGATAGCTAAAGTT	16
1398	LINC01204	RP11-245M24.1	Targeted lncRNA	ASO_G0229563_04	Exiqon	AGGCAGTTGAAGAGTA	16
1399	LINC01204	RP11-245M24.1	Targeted lncRNA	ASO_G0229563_05	Exiqon	AAGTAAGTGAGGAAGT	16
1400	LINC01204	RP11-245M24.1	Targeted lncRNA	ASO_G0229563_08	Exiqon	ATAAGTGACTGACTAA	16
1401	RP11-253M7.1	RP11-253M7.1	Targeted lncRNA	ASO_G0259426_01	Exiqon	ACAAAACAGGAGTCGA	16
1402	RP11-253M7.1	RP11-253M7.1	Targeted lncRNA	ASO_G0259426_02	Exiqon	GATCGCCGCTAGCTTT	16
1403	RP11-253M7.1	RP11-253M7.1	Targeted lncRNA	ASO_G0259426_03	Exiqon	GCCAACTTAGTGCGG	15
1404	RP11-253M7.1	RP11-253M7.1	Targeted lncRNA	ASO_G0259426_05	Exiqon	CGAGTCATCCTCCAGA	16
1405	RP11-253M7.1	RP11-253M7.1	Targeted lncRNA	ASO_G0259426_09	Exiqon	TGATTCGTGTCCTCGC	16
1406	RP11-253M7.1	RP11-253M7.1	Targeted lncRNA	ASO_G0259426_AD_01	GeneDesign	ACGACATTCCGACCTCTG	18
1407	RP11-253M7.1	RP11-253M7.1	Targeted lncRNA	ASO_G0259426_AD_03	GeneDesign	CTTTCAGCGTCGGTCG	16
1408	RP11-253M7.1	RP11-253M7.1	Targeted lncRNA	ASO_G0259426_AD_06	GeneDesign	TATTCATCTCCGTAAGGC	18
1409	RP11-253M7.1	RP11-253M7.1	Targeted lncRNA	ASO_G0259426_AD_07	GeneDesign	TCCTAACGTCCCGCAG	16
1410	RP11-253M7.1	RP11-253M7.1	Targeted lncRNA	ASO_G0259426_AD_10	GeneDesign	TTGGATAAGACTCGCCTG	18
1411	RP11-25K19.1	RP11-25K19.1	Targeted lncRNA	ASO_G0167912_01	Exiqon	TCAATCGTGAAGGTAG	16
1412	RP11-25K19.1	RP11-25K19.1	Targeted lncRNA	ASO_G0167912_02	Exiqon	ACAAGTGGAACGGATG	16
1413	RP11-25K19.1	RP11-25K19.1	Targeted lncRNA	ASO_G0167912_04	Exiqon	AACGAGAAGAAATTAA	16
1414	RP11-25K19.1	RP11-25K19.1	Targeted lncRNA	ASO_G0167912_05	Exiqon	GATAGAAATTTAAGCT	16
1415	RP11-25K19.1	RP11-25K19.1	Targeted lncRNA	ASO_G0167912_07	Exiqon	GACACGGCAAGTTGCA	16
1416	RP11-295G20.2	RP11-295G20.2	Targeted lncRNA	ASO_G0233461_01	Exiqon	GCCAAGTTACTCCATT	16
1417	RP11-295G20.2	RP11-295G20.2	Targeted lncRNA	ASO_G0233461_03	Exiqon	CTTTGCTCCATGGTGG	16
1418	RP11-295G20.2	RP11-295G20.2	Targeted lncRNA	ASO_G0233461_05	Exiqon	CAGGAGGACGCATCGT	16
1419	RP11-295G20.2	RP11-295G20.2	Targeted lncRNA	ASO_G0233461_07	Exiqon	TGCCTCAGGTGGGTTG	16
1420	RP11-295G20.2	RP11-295G20.2	Targeted lncRNA	ASO_G0233461_09	Exiqon	CACGATCACACAGATC	16
1421	RP11-295G20.2	RP11-295G20.2	Targeted lncRNA	ASO_G0233461_AD_02	GeneDesign	CGGAGGAACTACAACC	16
1422	RP11-295G20.2	RP11-295G20.2	Targeted lncRNA	ASO_G0233461_AD_03	GeneDesign	CGTATATAGTTAGGAGGC	18
1423	RP11-295G20.2	RP11-295G20.2	Targeted lncRNA	ASO_G0233461_AD_04	GeneDesign	GATTGACTCGCATATTTC	18
1424	RP11-295G20.2	RP11-295G20.2	Targeted lncRNA	ASO_G0233461_AD_06	GeneDesign	GTTACCTTCGTGCCAGAG	18
1425	RP11-295G20.2	RP11-295G20.2	Targeted lncRNA	ASO_G0233461_AD_07	GeneDesign	TAAGGTGTCCCGAAGGTG	18
1426	PRDX6-AS1	RP11-296O14.3	Targeted lncRNA	ASO_G0203739_01	Exiqon	CTGGCGAAGCTTGATT	16
1427	PRDX6-AS1	RP11-296O14.3	Targeted lncRNA	ASO_G0203739_02	Exiqon	CGGCACCAATGGATCT	16
1428	PRDX6-AS1	RP11-296O14.3	Targeted lncRNA	ASO_G0203739_07	Exiqon	AGAGCACCCACTTCAT	16
1429	PRDX6-AS1	RP11-296O14.3	Targeted lncRNA	ASO_G0203739_08	Exiqon	GGAAACGGCCTGGTCT	16
1430	PRDX6-AS1	RP11-296O14.3	Targeted lncRNA	ASO_G0203739_10	Exiqon	TGCACACAGCTGTAAG	16
1431	PRDX6-AS1	RP11-296O14.3	Targeted lncRNA	ASO_G0203739_AD_03	GeneDesign	AGTACTCGCAATGTAATC	18
1432	PRDX6-AS1	RP11-296O14.3	Targeted lncRNA	ASO_G0203739_AD_04	GeneDesign	CAGAACATCGACCTTTAC	18
1433	PRDX6-AS1	RP11-296O14.3	Targeted lncRNA	ASO_G0203739_AD_05	GeneDesign	CCGACGTACATTCTAT	16
1434	PRDX6-AS1	RP11-296O14.3	Targeted lncRNA	ASO_G0203739_AD_07	GeneDesign	CTTAGACAGTTCATCGTA	18
1435	PRDX6-AS1	RP11-296O14.3	Targeted lncRNA	ASO_G0203739_AD_10	GeneDesign	TACACCGAGAATGGATAC	18
1436	TBX2-AS1	RP11-332H18.4	Targeted lncRNA	ASO_G0267280_03	Exiqon	GGTCGTGTCAATGCTT	16
1437	TBX2-AS1	RP11-332H18.4	Targeted lncRNA	ASO_G0267280_04	Exiqon	GCTGAGAAGACGATCC	16
1438	TBX2-AS1	RP11-332H18.4	Targeted lncRNA	ASO_G0267280_07	Exiqon	GTGGAAACGTTGAGTT	16
1439	TBX2-AS1	RP11-332H18.4	Targeted lncRNA	ASO_G0267280_08	Exiqon	TGAGAGGCCTTCATCT	16
1440	TBX2-AS1	RP11-332H18.4	Targeted lncRNA	ASO_G0267280_09	Exiqon	ATGATCTGGAAAGAGG	16
1441	RP11-333E1.1	RP11-333E1.1	Targeted lncRNA	ASO_G0261879_02	Exiqon	TCTGGATCATCTTAGC	16
1442	RP11-333E1.1	RP11-333E1.1	Targeted lncRNA	ASO_G0261879_03	Exiqon	GCTGGTGGAGGAATAA	16
1443	RP11-333E1.1	RP11-333E1.1	Targeted lncRNA	ASO_G0261879_05	Exiqon	AGACGAGGTAATGGCC	16
1444	RP11-333E1.1	RP11-333E1.1	Targeted lncRNA	ASO_G0261879_08	Exiqon	AACACAGTAGATTAGC	16
1445	RP11-333E1.1	RP11-333E1.1	Targeted lncRNA	ASO_G0261879_09	Exiqon	AGAAGGTCCACTGTGA	16
1446	RP11-333E1.1	RP11-333E1.1	Targeted lncRNA	ASO_G0261879_AD_01	GeneDesign	ATGTGTATTCGATAGGAT	18
1447	RP11-333E1.1	RP11-333E1.1	Targeted lncRNA	ASO_G0261879_AD_03	GeneDesign	CACGATCCTACGCTACGC	18
1448	RP11-333E1.1	RP11-333E1.1	Targeted lncRNA	ASO_G0261879_AD_04	GeneDesign	CGACGCACCCAATAGC	16
1449	RP11-333E1.1	RP11-333E1.1	Targeted lncRNA	ASO_G0261879_AD_05	GeneDesign	CGATCTACACCACTTCTT	18
1450	RP11-333E1.1	RP11-333E1.1	Targeted lncRNA	ASO_G0261879_AD_07	GeneDesign	CGGGATAGATACCATAGA	18
1451	RP11-33B1.1	RP11-33B1.1	Targeted lncRNA	ASO_G0245958_01	Exiqon	TGATCACGTCCTCAAG	16
1452	RP11-33B1.1	RP11-33B1.1	Targeted lncRNA	ASO_G0245958_02	Exiqon	CACTGACTTGATTGAG	16
1453	RP11-33B1.1	RP11-33B1.1	Targeted lncRNA	ASO_G0245958_05	Exiqon	GTCATGAGATGGTCAA	16
1454	RP11-33B1.1	RP11-33B1.1	Targeted lncRNA	ASO_G0245958_09	Exiqon	TGATGCAAAGCAGGTG	16
1455	RP11-33B1.1	RP11-33B1.1	Targeted lncRNA	ASO_G0245958_10	Exiqon	CGAAGCCTAGCGACAC	16
1456	RP11-33B1.1	RP11-33B1.1	Targeted lncRNA	ASO_G0245958_AD_01	GeneDesign	ATAGCCGTCAGTCCACAC	18
1457	RP11-33B1.1	RP11-33B1.1	Targeted lncRNA	ASO_G0245958_AD_02	GeneDesign	CACAGTTGGAACGAAGAC	18
1458	RP11-33B1.1	RP11-33B1.1	Targeted lncRNA	ASO_G0245958_AD_04	GeneDesign	CGCATAATGGTCAAGGTC	18
1459	RP11-33B1.1	RP11-33B1.1	Targeted lncRNA	ASO_G0245958_AD_06	GeneDesign	CTAACGGCAATCCCAATT	18
1460	RP11-33B1.1	RP11-33B1.1	Targeted lncRNA	ASO_G0245958_AD_07	GeneDesign	GATAAAGCAGCCTACGAC	18
1461	RP11-345P4.9	RP11-345P4.9	Targeted lncRNA	ASO_G0272106_01	Exiqon	TCGGAACAGGAGAATC	16
1462	RP11-345P4.9	RP11-345P4.9	Targeted lncRNA	ASO_G0272106_02	Exiqon	GAGAAACTAGCAGTGC	16
1463	RP11-345P4.9	RP11-345P4.9	Targeted lncRNA	ASO_G0272106_03	Exiqon	GAAACGTCCGGGCAAG	16
1464	RP11-345P4.9	RP11-345P4.9	Targeted lncRNA	ASO_G0272106_07	Exiqon	CAGAAACGCGGAGACT	16
1465	RP11-345P4.9	RP11-345P4.9	Targeted lncRNA	ASO_G0272106_08	Exiqon	TGTAACCGGACTTACT	16
1466	LINC02762	RP11-356J5.12	Targeted lncRNA	ASO_G0250303_03	Exiqon	GTGTCACCCAACTTAA	16
1467	LINC02762	RP11-356J5.12	Targeted lncRNA	ASO_G0250303_07	Exiqon	AACTTAACGTCTTGCC	16
1468	LINC02762	RP11-356J5.12	Targeted lncRNA	ASO_G0250303_08	Exiqon	GAAAGCAAAATCCAGC	16
1469	LINC02762	RP11-356J5.12	Targeted lncRNA	ASO_G0250303_09	Exiqon	GCACCCAGGCTAACAA	16
1470	LINC02762	RP11-356J5.12	Targeted lncRNA	ASO_G0250303_10	Exiqon	CCACAAATCACGGGTA	16
1471	LINC01278	RP11-357C3.3	Targeted lncRNA	ASO_G0235437_05	Exiqon	GAGCAAAGGAAAGCAT	16
1472	LINC01278	RP11-357C3.3	Targeted lncRNA	ASO_G0235437_06	Exiqon	AGATCTAAGCCTTCCG	16
1473	LINC01278	RP11-357C3.3	Targeted lncRNA	ASO_G0235437_07	Exiqon	CCACTTCGCCACGGTC	16
1474	LINC01278	RP11-357C3.3	Targeted lncRNA	ASO_G0235437_08	Exiqon	GATAGGAACTTTTGCT	16
1475	LINC01278	RP11-357C3.3	Targeted lncRNA	ASO_G0235437_09	Exiqon	GGTAGTCGGCTTACTT	16
1476	RP11-379H18.1	RP11-379H18.1	Targeted lncRNA	ASO_G0271122_01	Exiqon	GCGAACCTTTGATGGA	16
1477	RP11-379H18.1	RP11-379H18.1	Targeted lncRNA	ASO_G0271122_03	Exiqon	ACGGAAACTGACACTT	16
1478	RP11-379H18.1	RP11-379H18.1	Targeted lncRNA	ASO_G0271122_04	Exiqon	GCGGTCAAGACAGGGT	16
1479	RP11-379H18.1	RP11-379H18.1	Targeted lncRNA	ASO_G0271122_05	Exiqon	TTAATTCAAGTGGCTG	16
1480	RP11-379H18.1	RP11-379H18.1	Targeted lncRNA	ASO_G0271122_06	Exiqon	CATGGAAGAGAATCGT	16
1481	RP11-37B2.1	RP11-37B2.1	Targeted lncRNA	ASO_G0251136_02	Exiqon	CATCACGTCACTCCAA	16
1482	RP11-37B2.1	RP11-37B2.1	Targeted lncRNA	ASO_G0251136_04	Exiqon	TGAACTTGCTCCACTA	16
1483	RP11-37B2.1	RP11-37B2.1	Targeted lncRNA	ASO_G0251136_07	Exiqon	GTCGCTAACCAATCCG	16
1484	RP11-37B2.1	RP11-37B2.1	Targeted lncRNA	ASO_G0251136_08	Exiqon	CAAATCGCTTCCTGCG	16
1485	RP11-37B2.1	RP11-37B2.1	Targeted lncRNA	ASO_G0251136_09	Exiqon	GTAATGATCCAAGAGT	16
1486	RP11-38L15.3	RP11-38L15.3	Targeted lncRNA	ASO_G0231187_01	Exiqon	CTTCGCGGTCAGTTGC	16
1487	RP11-38L15.3	RP11-38L15.3	Targeted lncRNA	ASO_G0231187_02	Exiqon	CGGCTTGAGGAGGATC	16
1488	RP11-38L15.3	RP11-38L15.3	Targeted lncRNA	ASO_G0231187_04	Exiqon	ATCACACTTACAAGAG	16
1489	RP11-38L15.3	RP11-38L15.3	Targeted lncRNA	ASO_G0231187_07	Exiqon	CAAGAGGACAGAATGG	16
1490	RP11-38L15.3	RP11-38L15.3	Targeted lncRNA	ASO_G0231187_08	Exiqon	CTGAGCAGGTGAGGCA	16
1491	RP11-390P2.4	RP11-390P2.4	Targeted lncRNA	ASO_G0225177_01	Exiqon	AGAATAAGCAGCTAG	15
1492	RP11-390P2.4	RP11-390P2.4	Targeted lncRNA	ASO_G0225177_02	Exiqon	ATCAGGAAGGTCAGCT	16
1493	RP11-390P2.4	RP11-390P2.4	Targeted lncRNA	ASO_G0225177_06	Exiqon	TAAGAGTCTGCATGGA	16
1494	RP11-390P2.4	RP11-390P2.4	Targeted lncRNA	ASO_G0225177_07	Exiqon	CTAGCAAGTGGGCTGT	16
1495	RP11-390P2.4	RP11-390P2.4	Targeted lncRNA	ASO_G0225177_10	Exiqon	TGGGAGGGTGACATCG	16
1496	MUC12-AS1	RP11-395B7.4	Targeted lncRNA	ASO_G0227053_01	Exiqon	GCAGATTCGGCCTTGA	16
1497	MUC12-AS1	RP11-395B7.4	Targeted lncRNA	ASO_G0227053_03	Exiqon	GTGATGCAGGGTCGGA	16
1498	MUC12-AS1	RP11-395B7.4	Targeted lncRNA	ASO_G0227053_04	Exiqon	TGGTCGGCAGTGGGAA	16
1499	MUC12-AS1	RP11-395B7.4	Targeted lncRNA	ASO_G0227053_07	Exiqon	GCTGAGATGGAGCGTC	16
1500	MUC12-AS1	RP11-395B7.4	Targeted lncRNA	ASO_G0227053_08	Exiqon	TACCAAGGCTCCCATC	16
1501	RP11-398K22.12	RP11-398K22.12	Targeted lncRNA	ASO_G0229852_01	Exiqon	CCGTCAATCAGCCTTT	16
1502	RP11-398K22.12	RP11-398K22.12	Targeted lncRNA	ASO_G0229852_03	Exiqon	TACACAGAGCAGGCGG	16
1503	RP11-398K22.12	RP11-398K22.12	Targeted lncRNA	ASO_G0229852_04	Exiqon	GTGTAGTCGCAAAATC	16
1504	RP11-398K22.12	RP11-398K22.12	Targeted lncRNA	ASO_G0229852_05	Exiqon	GACTCAAGAGCTGCTG	16
1505	RP11-398K22.12	RP11-398K22.12	Targeted lncRNA	ASO_G0229852_07	Exiqon	TCAGAATCTAGCTGTC	16
1506	RP11-398K22.12	RP11-398K22.12	Targeted lncRNA	ASO_G0229852_AD_01	GeneDesign	ACCGACTAAGCTAATTTC	18
1507	RP11-398K22.12	RP11-398K22.12	Targeted lncRNA	ASO_G0229852_AD_02	GeneDesign	ATCTAATTGTCCAAACGG	18
1508	RP11-398K22.12	RP11-398K22.12	Targeted lncRNA	ASO_G0229852_AD_03	GeneDesign	CAGGTAATCATCTCCG	16
1509	RP11-398K22.12	RP11-398K22.12	Targeted lncRNA	ASO_G0229852_AD_08	GeneDesign	TATGCTGCTACACGAGAC	18
1510	RP11-398K22.12	RP11-398K22.12	Targeted lncRNA	ASO_G0229852_AD_09	GeneDesign	TGTAACACACTCACCG	16
1511	LINC01615	RP11-417E7.1	Targeted lncRNA	ASO_G0223485_01	Exiqon	TGATCAATGCCGAGGA	16
1512	LINC01615	RP11-417E7.1	Targeted lncRNA	ASO_G0223485_02	Exiqon	GTTGCGAAGTGGAATG	16
1513	LINC01615	RP11-417E7.1	Targeted lncRNA	ASO_G0223485_03	Exiqon	CGGATGCAATTGAGTT	16
1514	LINC01615	RP11-417E7.1	Targeted lncRNA	ASO_G0223485_04	Exiqon	TCCGAGAAGAAAGAAT	16
1515	LINC01615	RP11-417E7.1	Targeted lncRNA	ASO_G0223485_05	Exiqon	CAAATGCAGTCAACGT	16
1516	LINC01615	RP11-417E7.1	Targeted lncRNA	ASO_G0223485_AD_01	GeneDesign	CGAAGACTGGGCGGCTT	17
1517	LINC01615	RP11-417E7.1	Targeted lncRNA	ASO_G0223485_AD_04	GeneDesign	GATGAGGTAGCTGATGAGG	19
1518	LINC01615	RP11-417E7.1	Targeted lncRNA	ASO_G0223485_AD_06	GeneDesign	CGTTATCTTCGGGATC	16
1519	LINC01615	RP11-417E7.1	Targeted lncRNA	ASO_G0223485_AD_07	GeneDesign	GAGCAATGCGTGTACC	16
1520	LINC01615	RP11-417E7.1	Targeted lncRNA	ASO_G0223485_AD_08	GeneDesign	CGGACTCAGACAGTGGA	17
1521	LINC01137	RP11-422J8.1	Targeted lncRNA	ASO_G0233621_01	Exiqon	AGATCGCTGTGGAAAT	16
1522	LINC01137	RP11-422J8.1	Targeted lncRNA	ASO_G0233621_04	Exiqon	GATTCACTCGATGCGC	16
1523	LINC01137	RP11-422J8.1	Targeted lncRNA	ASO_G0233621_05	Exiqon	AGCTCACCGGTCCTTG	16
1524	LINC01137	RP11-422J8.1	Targeted lncRNA	ASO_G0233621_06	Exiqon	TTCTTAGGTCCGAGT	15
1525	LINC01137	RP11-422J8.1	Targeted lncRNA	ASO_G0233621_09	Exiqon	GTGCAGAGAAGTTAGG	16
1526	RP11-428J1.5	RP11-428J1.5	Targeted lncRNA	ASO_G0272142_01	Exiqon	GGCATTAGCAGACGAA	16
1527	RP11-428J1.5	RP11-428J1.5	Targeted lncRNA	ASO_G0272142_02	Exiqon	ATCTATGGTTGGACAT	16
1528	RP11-428J1.5	RP11-428J1.5	Targeted lncRNA	ASO_G0272142_03	Exiqon	GCGTGCGAGAGAGGTT	16
1529	RP11-428J1.5	RP11-428J1.5	Targeted lncRNA	ASO_G0272142_05	Exiqon	AGTAAACAGACTCGGG	16
1530	RP11-428J1.5	RP11-428J1.5	Targeted lncRNA	ASO_G0272142_07	Exiqon	AATGACCCAGAATTTA	16
1531	RP11-432J22.2	RP11-432J22.2	Targeted lncRNA	ASO_G0238058_01	Exiqon	ACGGCTGACTCAAGA	15
1532	RP11-432J22.2	RP11-432J22.2	Targeted lncRNA	ASO_G0238058_03	Exiqon	CGGCTGACTCAAGAAA	16
1533	RP11-432J22.2	RP11-432J22.2	Targeted lncRNA	ASO_G0238058_06	Exiqon	CGGCTGACTCAAGAA	15
1534	RP11-432J22.2	RP11-432J22.2	Targeted lncRNA	ASO_G0238058_07	Exiqon	CAACAGACGCCGCGCT	16
1535	RP11-432J22.2	RP11-432J22.2	Targeted lncRNA	ASO_G0238058_08	Exiqon	CGCCGGTCTTTGCTCA	16
1536	LINC01719	RP11-458D21.1	Targeted lncRNA	ASO_G0233396_01	Exiqon	ATGAAGGGTAGTGTCT	16
1537	LINC01719	RP11-458D21.1	Targeted lncRNA	ASO_G0233396_02	Exiqon	GTCTAATGGCATGGAA	16
1538	LINC01719	RP11-458D21.1	Targeted lncRNA	ASO_G0233396_06	Exiqon	TTTGGAAGAGAACAGA	16
1539	LINC01719	RP11-458D21.1	Targeted lncRNA	ASO_G0233396_07	Exiqon	GAGAATGACAGAACGT	16
1540	LINC01719	RP11-458D21.1	Targeted lncRNA	ASO_G0233396_10	Exiqon	GCAGTGGATTAAACAT	16
1541	FOXC2-AS1	RP11-463O9.5	Targeted lncRNA	ASO_G0260944_03	Exiqon	GCTCAACGAGTGCTTC	16
1542	FOXC2-AS1	RP11-463O9.5	Targeted lncRNA	ASO_G0260944_04	Exiqon	TACGCAGCCGATGAAC	16
1543	FOXC2-AS1	RP11-463O9.5	Targeted lncRNA	ASO_G0260944_05	Exiqon	AAGAGGCCTGGTGGGT	16
1544	FOXC2-AS1	RP11-463O9.5	Targeted lncRNA	ASO_G0260944_06	Exiqon	CCGGCGGCGCTTCAAA	16
1545	FOXC2-AS1	RP11-463O9.5	Targeted lncRNA	ASO_G0260944_08	Exiqon	ATTGCCTTCTAGTCGC	16
1546	ZNF213-AS1	RP11-473M20.14	Targeted lncRNA	ASO_G0263072_01	Exiqon	CGCTCTGGCTAACGTC	16
1547	ZNF213-AS1	RP11-473M20.14	Targeted lncRNA	ASO_G0263072_02	Exiqon	GGTTGGCTGGTAAGAA	16
1548	ZNF213-AS1	RP11-473M20.14	Targeted lncRNA	ASO_G0263072_03	Exiqon	GACAAAAGAGAACGAG	16
1549	ZNF213-AS1	RP11-473M20.14	Targeted lncRNA	ASO_G0263072_05	Exiqon	GGGTCGCAAGGAAATG	16
1550	ZNF213-AS1	RP11-473M20.14	Targeted lncRNA	ASO_G0263072_06	Exiqon	GGATCACATCTAAGCT	16
1551	RP11-474B16.1	RP11-474B16.1	Targeted lncRNA	ASO_G0257642_01	Exiqon	AACACTGCAAAAGATG	16
1552	RP11-474B16.1	RP11-474B16.1	Targeted lncRNA	ASO_G0257642_02	Exiqon	CATTTGCCAAAGAGAG	16
1553	RP11-474B16.1	RP11-474B16.1	Targeted lncRNA	ASO_G0257642_03	Exiqon	ATTCCAACCGTCGCT	15
1554	RP11-474B16.1	RP11-474B16.1	Targeted lncRNA	ASO_G0257642_05	Exiqon	TCATGCCAGATCAGTT	16
1555	RP11-474B16.1	RP11-474B16.1	Targeted lncRNA	ASO_G0257642_09	Exiqon	CGATGGACGCCACTT	15
1556	RP11-474B16.1	RP11-474B16.1	Targeted lncRNA	ASO_G0257642_AD_04	GeneDesign	CTACAATGTCGCTAACAA	18
1557	RP11-474B16.1	RP11-474B16.1	Targeted lncRNA	ASO_G0257642_AD_06	GeneDesign	GCCTAACGTGCTTGACAC	18
1558	RP11-474B16.1	RP11-474B16.1	Targeted lncRNA	ASO_G0257642_AD_07	GeneDesign	GCTCACTCCGAATTTACC	18
1559	RP11-474B16.1	RP11-474B16.1	Targeted lncRNA	ASO_G0257642_AD_08	GeneDesign	GTGAAACCAAGTCCCGAT	18
1560	RP11-474B16.1	RP11-474B16.1	Targeted lncRNA	ASO_G0257642_AD_10	GeneDesign	TGTATGAAGTTGCTACCG	18
1561	RP11-474P2.4	RP11-474P2.4	Targeted lncRNA	ASO_C0019316_01	Exiqon	GATTAGCTGGTAGTGA	16
1562	RP11-474P2.4	RP11-474P2.4	Targeted lncRNA	ASO_C0019316_02	Exiqon	GAGTTACCATCCTGAA	16
1563	RP11-474P2.4	RP11-474P2.4	Targeted lncRNA	ASO_C0019316_04	Exiqon	GGGATGCGTAAGTGGT	16
1564	RP11-474P2.4	RP11-474P2.4	Targeted lncRNA	ASO_C0019316_07	Exiqon	TCATTAGGGTTAGTCT	16
1565	RP11-474P2.4	RP11-474P2.4	Targeted lncRNA	ASO_C0019316_08	Exiqon	GTTGCTGAGTTGGTGC	16
1566	LINC01133	RP11-48O20.4	Targeted lncRNA	ASO_G0224259_01	Exiqon	TGACGAGACACATTTA	16
1567	LINC01133	RP11-48O20.4	Targeted lncRNA	ASO_G0224259_02	Exiqon	GCTGGAACAAGGACTT	16
1568	LINC01133	RP11-48O20.4	Targeted lncRNA	ASO_G0224259_05	Exiqon	AAAGTTGGAGCAAAGG	16
1569	LINC01133	RP11-48O20.4	Targeted lncRNA	ASO_G0224259_06	Exiqon	GCTCTGGATTCTTGAT	16
1570	LINC01133	RP11-48O20.4	Targeted lncRNA	ASO_G0224259_08	Exiqon	TCAGGTAACTTCAAGA	16
1571	RP11-499E18.1	RP11-499E18.1	Targeted lncRNA	ASO_G0248161_02	Exiqon	GGAATCATCACACTTT	16
1572	RP11-499E18.1	RP11-499E18.1	Targeted lncRNA	ASO_G0248161_03	Exiqon	AGCAGTGGCTTAAATC	16
1573	RP11-499E18.1	RP11-499E18.1	Targeted lncRNA	ASO_G0248161_04	Exiqon	CCAGGAGTTAGTTACA	16
1574	RP11-499E18.1	RP11-499E18.1	Targeted lncRNA	ASO_G0248161_06	Exiqon	TCATCAGAGTCCTTGG	16
1575	RP11-499E18.1	RP11-499E18.1	Targeted lncRNA	ASO_G0248161_09	Exiqon	CACATTCCAGTCAGCG	16
1576	RP11-500C11.3	RP11-500C11.3	Targeted lncRNA	ASO_G0272269_02	Exiqon	TTTACTGTCTGCTTAC	16
1577	RP11-500C11.3	RP11-500C11.3	Targeted lncRNA	ASO_G0272269_04	Exiqon	GTAATAGGCGCAACGG	16
1578	RP11-500C11.3	RP11-500C11.3	Targeted lncRNA	ASO_G0272269_05	Exiqon	CCAATTAAGCCTTACC	16
1579	RP11-500C11.3	RP11-500C11.3	Targeted lncRNA	ASO_G0272269_06	Exiqon	CAAGATCCGGACGCGG	16
1580	RP11-500C11.3	RP11-500C11.3	Targeted lncRNA	ASO_G0272269_08	Exiqon	AATGGGAAGAGGTTAC	16
1581	RP11-500C11.3	RP11-500C11.3	Targeted lncRNA	ASO_G0272269_AD_01	GeneDesign	AAGAACTCCCACCAGTCG	18
1582	RP11-500C11.3	RP11-500C11.3	Targeted lncRNA	ASO_G0272269_AD_02	GeneDesign	ACTTAACCAACCGACAGG	18
1583	RP11-500C11.3	RP11-500C11.3	Targeted lncRNA	ASO_G0272269_AD_03	GeneDesign	AGGGACGACGACGACG	16
1584	RP11-500C11.3	RP11-500C11.3	Targeted lncRNA	ASO_G0272269_AD_08	GeneDesign	CGTTCCGTTGTTGAAC	16
1585	RP11-500C11.3	RP11-500C11.3	Targeted lncRNA	ASO_G0272269_AD_10	GeneDesign	GACATTCTGGCTCGCG	16
1586	RP11-517P14.2	RP11-517P14.2	Targeted lncRNA	ASO_G0230555_01	Exiqon	AGTAGTCACTGGAATT	16
1587	RP11-517P14.2	RP11-517P14.2	Targeted lncRNA	ASO_G0230555_02	Exiqon	CAGCTAACTCATAGTC	16
1588	RP11-517P14.2	RP11-517P14.2	Targeted lncRNA	ASO_G0230555_03	Exiqon	TCTGATAGTAGTCAC	15
1589	RP11-517P14.2	RP11-517P14.2	Targeted lncRNA	ASO_G0230555_06	Exiqon	GGGTAATCCAGATTAA	16
1590	RP11-517P14.2	RP11-517P14.2	Targeted lncRNA	ASO_G0230555_07	Exiqon	TGCTAGGCTCAATCGA	16
1591	RP11-527D7.1	RP11-527D7.1	Targeted lncRNA	ASO_G0225554_01	Exiqon	AGCGACTAAGAAGATA	16
1592	RP11-527D7.1	RP11-527D7.1	Targeted lncRNA	ASO_G0225554_02	Exiqon	TCGGCTAGGGTAGTTA	16
1593	RP11-527D7.1	RP11-527D7.1	Targeted lncRNA	ASO_G0225554_04	Exiqon	GGTAGTTAATTGGGTA	16
1594	RP11-527D7.1	RP11-527D7.1	Targeted lncRNA	ASO_G0225554_05	Exiqon	CGATCACTCCGATGCG	16
1595	RP11-527D7.1	RP11-527D7.1	Targeted lncRNA	ASO_G0225554_07	Exiqon	TCGAGAGCGTCAGGCT	16
1596	RP11-527D7.1	RP11-527D7.1	Targeted lncRNA	ASO_G0225554_AD_01	GeneDesign	AACTTGTTTCTCGGTT	16
1597	RP11-527D7.1	RP11-527D7.1	Targeted lncRNA	ASO_G0225554_AD_03	GeneDesign	ACCGAACGCCTCTTCTAC	18
1598	RP11-527D7.1	RP11-527D7.1	Targeted lncRNA	ASO_G0225554_AD_04	GeneDesign	ACGTCTTGCTAAACTG	16
1599	RP11-527D7.1	RP11-527D7.1	Targeted lncRNA	ASO_G0225554_AD_05	GeneDesign	ATCAGGACTCGTTAGA	16
1600	RP11-527D7.1	RP11-527D7.1	Targeted lncRNA	ASO_G0225554_AD_06	GeneDesign	CAACGGATGACTGGGA	16
1601	LINC02482	RP11-539L10.3	Targeted lncRNA	ASO_G0251580_01	Exiqon	AGATCGTGACATTAGG	16
1602	LINC02482	RP11-539L10.3	Targeted lncRNA	ASO_G0251580_05	Exiqon	CCTTAAACTAGCGTGA	16
1603	LINC02482	RP11-539L10.3	Targeted lncRNA	ASO_G0251580_07	Exiqon	TCACATTGGCTGCAGT	16
1604	LINC02482	RP11-539L10.3	Targeted lncRNA	ASO_G0251580_08	Exiqon	GCGCTGGGCAGAATTT	16
1605	LINC02482	RP11-539L10.3	Targeted lncRNA	ASO_G0251580_10	Exiqon	AAAGAGCTGTGGCGCT	16
1606	LINC02482	RP11-539L10.3	Targeted lncRNA	ASO_G0251580_AD_01	GeneDesign	AATATTCTAACGGGAC	16
1607	LINC02482	RP11-539L10.3	Targeted lncRNA	ASO_G0251580_AD_03	GeneDesign	CAATCGACTCTGCTGG	16
1608	LINC02482	RP11-539L10.3	Targeted lncRNA	ASO_G0251580_AD_05	GeneDesign	CCACGTTTAAGGACCG	16
1609	LINC02482	RP11-539L10.3	Targeted lncRNA	ASO_G0251580_AD_09	GeneDesign	GTTATCAGCGTCAGAT	16
1610	LINC02482	RP11-539L10.3	Targeted lncRNA	ASO_G0251580_AD_10	GeneDesign	TTAGTCCGTTCACGCT	16
1611	LINC02709	RP11-540A21.2	Targeted lncRNA	ASO_G0245522_04	Exiqon	ATAAAATGCTTCGCCA	16
1612	LINC02709	RP11-540A21.2	Targeted lncRNA	ASO_G0245522_05	Exiqon	TGGGTGGGTTAGGATA	16
1613	LINC02709	RP11-540A21.2	Targeted lncRNA	ASO_G0245522_07	Exiqon	GCAAGTCTGTAACTTC	16
1614	LINC02709	RP11-540A21.2	Targeted lncRNA	ASO_G0245522_09	Exiqon	GTGACACGTGAAATCT	16
1615	LINC02709	RP11-540A21.2	Targeted lncRNA	ASO_G0245522_10	Exiqon	AGCAGTGAGTGACTTT	16
1616	RP11-545E17.3	RP11-545E17.3	Targeted lncRNA	ASO_G0223478_01	Exiqon	GTCAGGTCAGAACTAT	16
1617	RP11-545E17.3	RP11-545E17.3	Targeted lncRNA	ASO_G0223478_02	Exiqon	AGAGTGCGAGTGAGTT	16
1618	RP11-545E17.3	RP11-545E17.3	Targeted lncRNA	ASO_G0223478_03	Exiqon	GACACAGTGTGGTAAA	16
1619	RP11-545E17.3	RP11-545E17.3	Targeted lncRNA	ASO_G0223478_05	Exiqon	TTTAGTCATCACATCT	16
1620	RP11-545E17.3	RP11-545E17.3	Targeted lncRNA	ASO_G0223478_07	Exiqon	CGAAATCGTCGAACGA	16
1621	RP11-545E17.3	RP11-545E17.3	Targeted lncRNA	ASO_G0223478_AD_01	GeneDesign	CGCACGTCTATCAACAGT	18
1622	RP11-545E17.3	RP11-545E17.3	Targeted lncRNA	ASO_G0223478_AD_06	GeneDesign	GCCTAACCCACGGAAG	16
1623	RP11-545E17.3	RP11-545E17.3	Targeted lncRNA	ASO_G0223478_AD_07	GeneDesign	GTAAAGACGGCTCCCAGT	18
1624	RP11-545E17.3	RP11-545E17.3	Targeted lncRNA	ASO_G0223478_AD_08	GeneDesign	GTGCGTTTGGTGGGTTAA	18
1625	RP11-545E17.3	RP11-545E17.3	Targeted lncRNA	ASO_G0223478_AD_09	GeneDesign	TCTCTCGTCCGTTTGCAA	18
1626	LNCOG	RP11-54A9.1	Targeted lncRNA	ASO_G0257219_01	Exiqon	CAAGGAGCAAGTTGAG	16
1627	LNCOG	RP11-54A9.1	Targeted lncRNA	ASO_G0257219_03	Exiqon	GGCAATCAAGCAGTGT	16
1628	LNCOG	RP11-54A9.1	Targeted lncRNA	ASO_G0257219_07	Exiqon	TAAGTGTCAGGAGAAC	16
1629	LNCOG	RP11-54A9.1	Targeted lncRNA	ASO_G0257219_09	Exiqon	CTTAGAGCTCTGGATA	16
1630	LNCOG	RP11-54A9.1	Targeted lncRNA	ASO_G0257219_10	Exiqon	ACAAGGTTAATCACTC	16
1631	LNCOG	RP11-54A9.1	Targeted lncRNA	ASO_G0257219_AD_03	GeneDesign	ATACTGTCTCGTCTAC	16
1632	LNCOG	RP11-54A9.1	Targeted lncRNA	ASO_G0257219_AD_04	GeneDesign	CAAGAAATTATGACCGCG	18
1633	LNCOG	RP11-54A9.1	Targeted lncRNA	ASO_G0257219_AD_05	GeneDesign	CGTAATGATGGAGTAGCA	18
1634	LNCOG	RP11-54A9.1	Targeted lncRNA	ASO_G0257219_AD_08	GeneDesign	TATGCAACGACCTGTG	16
1635	LNCOG	RP11-54A9.1	Targeted lncRNA	ASO_G0257219_AD_10	GeneDesign	TCTAAGGAGAGTACGGGC	18
1636	RP11-550I24.2	RP11-550I24.2	Targeted lncRNA	ASO_G0243176_01	Exiqon	ACAGGTTAAAAGGCGA	16
1637	RP11-550I24.2	RP11-550I24.2	Targeted lncRNA	ASO_G0243176_02	Exiqon	AGAGTCAAGCTCGCGG	16
1638	RP11-550I24.2	RP11-550I24.2	Targeted lncRNA	ASO_G0243176_04	Exiqon	CGATGAACTAGCTCGA	16
1639	RP11-550I24.2	RP11-550I24.2	Targeted lncRNA	ASO_G0243176_05	Exiqon	CTCGCGGCAATAGAGC	16
1640	RP11-550I24.2	RP11-550I24.2	Targeted lncRNA	ASO_G0243176_08	Exiqon	TAGAGCCGAACTAAGA	16
1641	RP11-553K8.5	RP11-553K8.5	Targeted lncRNA	ASO_G0261573_01	Exiqon	CTATGCGTCCACACCT	16
1642	RP11-553K8.5	RP11-553K8.5	Targeted lncRNA	ASO_G0261573_02	Exiqon	GAAGGCAAAGTGGTAA	16
1643	RP11-553K8.5	RP11-553K8.5	Targeted lncRNA	ASO_G0261573_03	Exiqon	GAAGTTGCAAAACATT	16
1644	RP11-553K8.5	RP11-553K8.5	Targeted lncRNA	ASO_G0261573_04	Exiqon	AACCCCATTCTTGCTA	16
1645	RP11-553K8.5	RP11-553K8.5	Targeted lncRNA	ASO_G0261573_08	Exiqon	AACATGGACTCTAGT	15
1646	RP11-553K8.5	RP11-553K8.5	Targeted lncRNA	ASO_G0261573_AD_01	GeneDesign	CACTGATACGCCAACAAG	18
1647	RP11-553K8.5	RP11-553K8.5	Targeted lncRNA	ASO_G0261573_AD_03	GeneDesign	CCTATCGTTACAGAGT	16
1648	RP11-553K8.5	RP11-553K8.5	Targeted lncRNA	ASO_G0261573_AD_04	GeneDesign	CGGAGGGCTATAACAGAG	18
1649	RP11-553K8.5	RP11-553K8.5	Targeted lncRNA	ASO_G0261573_AD_05	GeneDesign	CTGACACCCCATTCGATA	18
1650	RP11-553K8.5	RP11-553K8.5	Targeted lncRNA	ASO_G0261573_AD_06	GeneDesign	GATCTCATATCACGCTTT	18
1651	PIK3CD-AS2	RP11-558F24.4	Targeted lncRNA	ASO_G0231789_01	Exiqon	AGACTGAACAGCAAGC	16
1652	PIK3CD-AS2	RP11-558F24.4	Targeted lncRNA	ASO_G0231789_02	Exiqon	GAGCCGCTTCGTTGG	15
1653	PIK3CD-AS2	RP11-558F24.4	Targeted lncRNA	ASO_G0231789_07	Exiqon	CTAAGCATGGAATAGT	16
1654	PIK3CD-AS2	RP11-558F24.4	Targeted lncRNA	ASO_G0231789_08	Exiqon	CCACAGCAGGAACGCG	16
1655	PIK3CD-AS2	RP11-558F24.4	Targeted lncRNA	ASO_G0231789_09	Exiqon	AAGTGCACACTGCCAT	16
1656	ADAMTS7P4	RP11-561C5.5	Targeted lncRNA	ASO_G0218052_01	Exiqon	ACATTGAGCATGATTC	16
1657	ADAMTS7P4	RP11-561C5.5	Targeted lncRNA	ASO_G0218052_02	Exiqon	TGCAACCTTCATCTTT	16
1658	ADAMTS7P4	RP11-561C5.5	Targeted lncRNA	ASO_G0218052_03	Exiqon	TCACGATCCTTTTGCT	16
1659	ADAMTS7P4	RP11-561C5.5	Targeted lncRNA	ASO_G0218052_05	Exiqon	ACCTCGCCACTCTAAG	16
1660	ADAMTS7P4	RP11-561C5.5	Targeted lncRNA	ASO_G0218052_06	Exiqon	CGACTCAAAACTCTGC	16
1661	PRANCR	RP11-611E13.2	Targeted lncRNA	ASO_G0257815_01	Exiqon	CTTTGAATGACAACGA	16
1662	PRANCR	RP11-611E13.2	Targeted lncRNA	ASO_G0257815_02	Exiqon	ACGACCGTGCTTTAAA	16
1663	PRANCR	RP11-611E13.2	Targeted lncRNA	ASO_G0257815_03	Exiqon	CCAAGCCACAATAATT	16
1664	PRANCR	RP11-611E13.2	Targeted lncRNA	ASO_G0257815_04	Exiqon	GGACTGGAGGTAATGA	16
1665	PRANCR	RP11-611E13.2	Targeted lncRNA	ASO_G0257815_05	Exiqon	TTTTGCAGTCGTCGCT	16
1666	PRANCR	RP11-611E13.2	Targeted lncRNA	ASO_G0257815_AD_01	GeneDesign	ACGAACACGAACACGCTC	18
1667	PRANCR	RP11-611E13.2	Targeted lncRNA	ASO_G0257815_AD_03	GeneDesign	CAAACGGTCTTGCGGA	16
1668	PRANCR	RP11-611E13.2	Targeted lncRNA	ASO_G0257815_AD_04	GeneDesign	CCCGCTCTCTGTAACG	16
1669	PRANCR	RP11-611E13.2	Targeted lncRNA	ASO_G0257815_AD_06	GeneDesign	CGATCAGATTCGCTCC	16
1670	PRANCR	RP11-611E13.2	Targeted lncRNA	ASO_G0257815_AD_07	GeneDesign	CGGTAGGGAAGTGAAGCG	18
1671	GIHCG	RP11-620J15.3	Targeted lncRNA	ASO_G0257698_01	Exiqon	AGCTTAGCTTCTTTAG	16
1672	GIHCG	RP11-620J15.3	Targeted lncRNA	ASO_G0257698_03	Exiqon	GCAGATAACGGTCAAT	16
1673	GIHCG	RP11-620J15.3	Targeted lncRNA	ASO_G0257698_04	Exiqon	ACGACTGGATAACCGC	16
1674	GIHCG	RP11-620J15.3	Targeted lncRNA	ASO_G0257698_05	Exiqon	CGCTAACGGCTCCAAA	16
1675	GIHCG	RP11-620J15.3	Targeted lncRNA	ASO_G0257698_07	Exiqon	TCACGACCCTTTAGCG	16
1676	NBDY	RP11-622K12.1	Targeted lncRNA	ASO_G0204272_01	Exiqon	CATCGAAATTCAGGAA	16
1677	NBDY	RP11-622K12.1	Targeted lncRNA	ASO_G0204272_03	Exiqon	ACAGAAACGGGTCGTC	16
1678	NBDY	RP11-622K12.1	Targeted lncRNA	ASO_G0204272_04	Exiqon	TATGAATGCACCAGGG	16
1679	NBDY	RP11-622K12.1	Targeted lncRNA	ASO_G0204272_05	Exiqon	AAAAGCAGGGTAGCAT	16
1680	NBDY	RP11-622K12.1	Targeted lncRNA	ASO_G0204272_06	Exiqon	ATAATCCCAACGCGGA	16
1681	RP11-656D10.3	RP11-656D10.3	Targeted lncRNA	ASO_G0238287_02	Exiqon	ATGCATAAATGGCTTC	16
1682	RP11-656D10.3	RP11-656D10.3	Targeted lncRNA	ASO_G0238287_03	Exiqon	CTCTTCCTCAACTTAC	16
1683	RP11-656D10.3	RP11-656D10.3	Targeted lncRNA	ASO_G0238287_04	Exiqon	ACAGTCTTGACTTTAG	16
1684	RP11-656D10.3	RP11-656D10.3	Targeted lncRNA	ASO_G0238287_05	Exiqon	CCTCATGCTCGGATA	15
1685	RP11-656D10.3	RP11-656D10.3	Targeted lncRNA	ASO_G0238287_07	Exiqon	TTCAAAACTAAACCCT	16
1686	LINC01503	RP11-65J3.1	Targeted lncRNA	ASO_G0233901_02	Exiqon	AGAGCTTTGGAAATGC	16
1687	LINC01503	RP11-65J3.1	Targeted lncRNA	ASO_G0233901_03	Exiqon	GAGGGCTGGAAAACGA	16
1688	LINC01503	RP11-65J3.1	Targeted lncRNA	ASO_G0233901_04	Exiqon	CGAAGAGTGCACAGTG	16
1689	LINC01503	RP11-65J3.1	Targeted lncRNA	ASO_G0233901_05	Exiqon	ACAAAGGCCTGCAGGA	16
1690	LINC01503	RP11-65J3.1	Targeted lncRNA	ASO_G0233901_07	Exiqon	GCATTACCAGAAAGGT	16
1691	RP11-660L16.2	RP11-660L16.2	Targeted lncRNA	ASO_G0254682_02	Exiqon	GCACGATGATCCAGGT	16
1692	RP11-660L16.2	RP11-660L16.2	Targeted lncRNA	ASO_G0254682_03	Exiqon	CGCTATGCTGAAGGGA	16
1693	RP11-660L16.2	RP11-660L16.2	Targeted lncRNA	ASO_G0254682_04	Exiqon	ATTTACACATCTTACA	16
1694	RP11-660L16.2	RP11-660L16.2	Targeted lncRNA	ASO_G0254682_06	Exiqon	GCACGTCCAAGGAGGA	16
1695	RP11-660L16.2	RP11-660L16.2	Targeted lncRNA	ASO_G0254682_09	Exiqon	GCGGCCATCTGTCTGA	16
1696	RP11-660L16.2	RP11-660L16.2	Targeted lncRNA	ASO_G0254682_AD_01	GeneDesign	ATACGCTCCATCAATGTG	18
1697	RP11-660L16.2	RP11-660L16.2	Targeted lncRNA	ASO_G0254682_AD_04	GeneDesign	CGTACTTAGACCAGACTC	18
1698	RP11-660L16.2	RP11-660L16.2	Targeted lncRNA	ASO_G0254682_AD_07	GeneDesign	GCTCACTTTACGTTCAAC	18
1699	RP11-660L16.2	RP11-660L16.2	Targeted lncRNA	ASO_G0254682_AD_09	GeneDesign	TCGGTCAGCTAAATCC	16
1700	RP11-660L16.2	RP11-660L16.2	Targeted lncRNA	ASO_G0254682_AD_10	GeneDesign	TGTGTTTACCTGATCG	16
1701	GACAT2	RP11-674N23.1	Targeted lncRNA	ASO_G0265962_01	Exiqon	ACGATCCAGGTGACTT	16
1702	GACAT2	RP11-674N23.1	Targeted lncRNA	ASO_G0265962_02	Exiqon	TTCGACAGGTAATAAT	16
1703	GACAT2	RP11-674N23.1	Targeted lncRNA	ASO_G0265962_04	Exiqon	AGTAGAGGTCCTTGGA	16
1704	GACAT2	RP11-674N23.1	Targeted lncRNA	ASO_G0265962_05	Exiqon	GTAAAGATGAGCTTAG	16
1705	GACAT2	RP11-674N23.1	Targeted lncRNA	ASO_G0265962_06	Exiqon	ACAGGTGATCCTTCGC	16
1706	CASP4LP	RP11-693N9.2	Targeted lncRNA	ASO_G0235505_01	Exiqon	TGGAAGCATGCGATGA	16
1707	CASP4LP	RP11-693N9.2	Targeted lncRNA	ASO_G0235505_02	Exiqon	ATGGTCAAACTCTTTA	16
1708	CASP4LP	RP11-693N9.2	Targeted lncRNA	ASO_G0235505_03	Exiqon	GTTAAGCATTCAATCT	16
1709	CASP4LP	RP11-693N9.2	Targeted lncRNA	ASO_G0235505_04	Exiqon	TACACCACCAACAACT	16
1710	CASP4LP	RP11-693N9.2	Targeted lncRNA	ASO_G0235505_10	Exiqon	TAGATAACAGCCTCC	15
1711	CASP4LP	RP11-693N9.2	Targeted lncRNA	ASO_G0235505_AD_01	GeneDesign	ACCAGTCAAGCGAATGTA	18
1712	CASP4LP	RP11-693N9.2	Targeted lncRNA	ASO_G0235505_AD_02	GeneDesign	ACCTGCCGATCCATATAT	18
1713	CASP4LP	RP11-693N9.2	Targeted lncRNA	ASO_G0235505_AD_06	GeneDesign	CTTATAGCCTAATACGTA	18
1714	CASP4LP	RP11-693N9.2	Targeted lncRNA	ASO_G0235505_AD_08	GeneDesign	TAATACTAGCTCCCGTGA	18
1715	CASP4LP	RP11-693N9.2	Targeted lncRNA	ASO_G0235505_AD_10	GeneDesign	TTTAGTCGGAGAAGCATC	18
1716	RP11-6N17.4	RP11-6N17.4	Targeted lncRNA	ASO_G0264920_01	Exiqon	TACTGCCGAAGAGCA	15
1717	RP11-6N17.4	RP11-6N17.4	Targeted lncRNA	ASO_G0264920_03	Exiqon	AGCTCAGTCAGGCATG	16
1718	RP11-6N17.4	RP11-6N17.4	Targeted lncRNA	ASO_G0264920_06	Exiqon	TCTGTGCTGGCCTCAA	16
1719	RP11-6N17.4	RP11-6N17.4	Targeted lncRNA	ASO_G0264920_07	Exiqon	TGAGGACAACCCTTAC	16
1720	RP11-6N17.4	RP11-6N17.4	Targeted lncRNA	ASO_G0264920_08	Exiqon	TAAAAGCTCCTGCCAC	16
1721	RP11-6N17.4	RP11-6N17.4	Targeted lncRNA	ASO_G0264920_AD_02	GeneDesign	ATCTAGGAGATACGGATC	18
1722	RP11-6N17.4	RP11-6N17.4	Targeted lncRNA	ASO_G0264920_AD_03	GeneDesign	CCCGTGAAGTACCGAG	16
1723	RP11-6N17.4	RP11-6N17.4	Targeted lncRNA	ASO_G0264920_AD_04	GeneDesign	CGACAACGAGAGAGGGAC	18
1724	RP11-6N17.4	RP11-6N17.4	Targeted lncRNA	ASO_G0264920_AD_05	GeneDesign	CTCAGGGAGTTTCGGTAC	18
1725	RP11-6N17.4	RP11-6N17.4	Targeted lncRNA	ASO_G0264920_AD_06	GeneDesign	GCGTCACAAGTAGTAAGC	18
1726	RP11-727A23.5	RP11-727A23.5	Targeted lncRNA	ASO_G0247137_01	Exiqon	GCGGTAGGATCAGAAG	16
1727	RP11-727A23.5	RP11-727A23.5	Targeted lncRNA	ASO_G0247137_03	Exiqon	ATCCTCAGGCAATTAA	16
1728	RP11-727A23.5	RP11-727A23.5	Targeted lncRNA	ASO_G0247137_04	Exiqon	GGCGCGATCGATGACA	16
1729	RP11-727A23.5	RP11-727A23.5	Targeted lncRNA	ASO_G0247137_05	Exiqon	CCGCAACACTAGCAGT	16
1730	RP11-727A23.5	RP11-727A23.5	Targeted lncRNA	ASO_G0247137_09	Exiqon	AGAGACGGACCTAGAT	16
1731	TMC3-AS1	RP11-761I4.3	Targeted lncRNA	ASO_G0259343_01	Exiqon	TCCACGCTTCTTAAAC	16
1732	TMC3-AS1	RP11-761I4.3	Targeted lncRNA	ASO_G0259343_04	Exiqon	ATTCCTTCAGTCAGAT	16
1733	TMC3-AS1	RP11-761I4.3	Targeted lncRNA	ASO_G0259343_05	Exiqon	GGTGAGATTGATGCTT	16
1734	TMC3-AS1	RP11-761I4.3	Targeted lncRNA	ASO_G0259343_06	Exiqon	TGGATGACTTGATTTG	16
1735	TMC3-AS1	RP11-761I4.3	Targeted lncRNA	ASO_G0259343_09	Exiqon	AAATCGCACCACTGTC	16
1736	FRG1JP	RP11-764K9.4	Targeted lncRNA	ASO_G0215548_01	Exiqon	TATGCTTAGAATCGGT	16
1737	FRG1JP	RP11-764K9.4	Targeted lncRNA	ASO_G0215548_03	Exiqon	AGCTCAGGACGAGTAT	16
1738	FRG1JP	RP11-764K9.4	Targeted lncRNA	ASO_G0215548_04	Exiqon	GGAACAGAAGTGTAGG	16
1739	FRG1JP	RP11-764K9.4	Targeted lncRNA	ASO_G0215548_05	Exiqon	ATCTAATAAAGCATCT	16
1740	FRG1JP	RP11-764K9.4	Targeted lncRNA	ASO_G0215548_08	Exiqon	CACAAGCTTGGTAGAC	16
1741	PPP1R14B-AS1	RP11-783K16.5	Targeted lncRNA	ASO_G0256940_01	Exiqon	GTTAGACTGTGGTTAC	16
1742	PPP1R14B-AS1	RP11-783K16.5	Targeted lncRNA	ASO_G0256940_02	Exiqon	CCTAATAGCAGTGGAT	16
1743	PPP1R14B-AS1	RP11-783K16.5	Targeted lncRNA	ASO_G0256940_03	Exiqon	CGCTGGGTTAGACTGT	16
1744	PPP1R14B-AS1	RP11-783K16.5	Targeted lncRNA	ASO_G0256940_04	Exiqon	ACGAGTGTGACATAGT	16
1745	PPP1R14B-AS1	RP11-783K16.5	Targeted lncRNA	ASO_G0256940_09	Exiqon	CAGTGGATTTGAAGAC	16
1746	LINC02381	RP11-834C11.4	Targeted lncRNA	ASO_G0250742_01	Exiqon	GTGGCAAACTGAGGTA	16
1747	LINC02381	RP11-834C11.4	Targeted lncRNA	ASO_G0250742_02	Exiqon	ACCAAGGTCTGGAACA	16
1748	LINC02381	RP11-834C11.4	Targeted lncRNA	ASO_G0250742_03	Exiqon	ACAACATTCCCTCGAC	16
1749	LINC02381	RP11-834C11.4	Targeted lncRNA	ASO_G0250742_04	Exiqon	ACAAACCTTTACATCC	16
1750	LINC02381	RP11-834C11.4	Targeted lncRNA	ASO_G0250742_05	Exiqon	TGAACAGCCGAAGCGA	16
1751	LINC02381	RP11-834C11.4	Targeted lncRNA	ASO_G0250742_AD_01	GeneDesign	CTGTCTTTATCTCTAATCT	19
1752	LINC02381	RP11-834C11.4	Targeted lncRNA	ASO_G0250742_AD_02	GeneDesign	ATAAAGGAAGGGAGAAGCT	19
1753	LINC02381	RP11-834C11.4	Targeted lncRNA	ASO_G0250742_AD_04	GeneDesign	CGCTATAGCGTGAGTG	16
1754	LINC02381	RP11-834C11.4	Targeted lncRNA	ASO_G0250742_AD_05	GeneDesign	TCTAGGCTGGTAATCGG	17
1755	LINC02381	RP11-834C11.4	Targeted lncRNA	ASO_G0250742_AD_09	GeneDesign	TCCTGCGAAGCAAGTC	16
1756	SRP54-AS1	RP11-85K15.2	Targeted lncRNA	ASO_G0258704_01	Exiqon	TACACGTAGGGCAATC	16
1757	SRP54-AS1	RP11-85K15.2	Targeted lncRNA	ASO_G0258704_03	Exiqon	TGGAGCAAGCCGCGCA	16
1758	SRP54-AS1	RP11-85K15.2	Targeted lncRNA	ASO_G0258704_04	Exiqon	CATAGAGTTGCACTGC	16
1759	SRP54-AS1	RP11-85K15.2	Targeted lncRNA	ASO_G0258704_05	Exiqon	ATCGTGTCACTAAACT	16
1760	SRP54-AS1	RP11-85K15.2	Targeted lncRNA	ASO_G0258704_09	Exiqon	GGCGGTCGGCAGGAGC	16
1761	SRP54-AS1	RP11-85K15.2	Targeted lncRNA	ASO_G0258704_AD_01	GeneDesign	AAGACGCAACTCCCACCG	18
1762	SRP54-AS1	RP11-85K15.2	Targeted lncRNA	ASO_G0258704_AD_02	GeneDesign	ACCTTGTTCACCTAAACG	18
1763	SRP54-AS1	RP11-85K15.2	Targeted lncRNA	ASO_G0258704_AD_04	GeneDesign	AGTCGTTATAAGCAAACC	18
1764	SRP54-AS1	RP11-85K15.2	Targeted lncRNA	ASO_G0258704_AD_06	GeneDesign	ATCCTTGATACAAATACG	18
1765	SRP54-AS1	RP11-85K15.2	Targeted lncRNA	ASO_G0258704_AD_07	GeneDesign	GACTACGAAATGTATGAC	18
1766	RP11-863P13.3	RP11-863P13.3	Targeted lncRNA	ASO_G0261327_01	Exiqon	CGTGATTAAACGTATG	16
1767	RP11-863P13.3	RP11-863P13.3	Targeted lncRNA	ASO_G0261327_02	Exiqon	GACAAACCACAGACTA	16
1768	RP11-863P13.3	RP11-863P13.3	Targeted lncRNA	ASO_G0261327_05	Exiqon	GCGCACGGTGAAAAGG	16
1769	RP11-863P13.3	RP11-863P13.3	Targeted lncRNA	ASO_G0261327_09	Exiqon	AAAGTTGCTGGACATA	16
1770	RP11-863P13.3	RP11-863P13.3	Targeted lncRNA	ASO_G0261327_10	Exiqon	ACTTACCAAGTCGTCG	16
1771	RP11-863P13.3	RP11-863P13.3	Targeted lncRNA	ASO_G0261327_AD_04	GeneDesign	CCACGCATAGACACTC	16
1772	RP11-863P13.3	RP11-863P13.3	Targeted lncRNA	ASO_G0261327_AD_05	GeneDesign	CGAACACAGCACCGAG	16
1773	RP11-863P13.3	RP11-863P13.3	Targeted lncRNA	ASO_G0261327_AD_06	GeneDesign	CGAGTCAAGCCGTCAG	16
1774	RP11-863P13.3	RP11-863P13.3	Targeted lncRNA	ASO_G0261327_AD_07	GeneDesign	CGGTCAAAGTCGCACACG	18
1775	RP11-863P13.3	RP11-863P13.3	Targeted lncRNA	ASO_G0261327_AD_10	GeneDesign	TTTCCGACCGCCTCTG	16
1776	RP11-879F14.2	RP11-879F14.2	Targeted lncRNA	ASO_G0267279_01	Exiqon	GTGTAGAAGGGAGTC	15
1777	RP11-879F14.2	RP11-879F14.2	Targeted lncRNA	ASO_G0267279_04	Exiqon	TTGCTCTAGAGACTGT	16
1778	RP11-879F14.2	RP11-879F14.2	Targeted lncRNA	ASO_G0267279_05	Exiqon	CGCTTCACTTCAAGGA	16
1779	RP11-879F14.2	RP11-879F14.2	Targeted lncRNA	ASO_G0267279_06	Exiqon	AATGCGGGCTGCCTAT	16
1780	RP11-879F14.2	RP11-879F14.2	Targeted lncRNA	ASO_G0267279_07	Exiqon	CCCACTAAGATCCTAT	16
1781	LINC01569	RP11-95P2.1	Targeted lncRNA	ASO_G0262468_01	Exiqon	ACGAAGAGCAGGTGAT	16
1782	LINC01569	RP11-95P2.1	Targeted lncRNA	ASO_G0262468_02	Exiqon	GTTGCCACAAGAAGGA	16
1783	LINC01569	RP11-95P2.1	Targeted lncRNA	ASO_G0262468_04	Exiqon	ACAGCGAAAACTAATA	16
1784	LINC01569	RP11-95P2.1	Targeted lncRNA	ASO_G0262468_05	Exiqon	TTTGATGGGCAAGGGT	16
1785	LINC01569	RP11-95P2.1	Targeted lncRNA	ASO_G0262468_07	Exiqon	AGTGGAGATGATAAGA	16
1786	LINC01569	RP11-95P2.1	Targeted lncRNA	ASO_G0262468_AD_02	GeneDesign	AACTCGGCAGAAGGACGA	18
1787	LINC01569	RP11-95P2.1	Targeted lncRNA	ASO_G0262468_AD_03	GeneDesign	ATCAACAGACTAACCGCT	18
1788	LINC01569	RP11-95P2.1	Targeted lncRNA	ASO_G0262468_AD_04	GeneDesign	CAGAACCTTTCGTCAGCG	18
1789	LINC01569	RP11-95P2.1	Targeted lncRNA	ASO_G0262468_AD_05	GeneDesign	CCATTCGTAAGACTAACG	18
1790	LINC01569	RP11-95P2.1	Targeted lncRNA	ASO_G0262468_AD_07	GeneDesign	CGCACTGAGATTGACACG	18
1791	RP11-977G19.11	RP11-977G19.11	Targeted lncRNA	ASO_G0257303_02	Exiqon	ACATCCACATGACTGG	16
1792	RP11-977G19.11	RP11-977G19.11	Targeted lncRNA	ASO_G0257303_03	Exiqon	AAAAGATTTGGCTCTG	16
1793	RP11-977G19.11	RP11-977G19.11	Targeted lncRNA	ASO_G0257303_04	Exiqon	CAAGGTGAGCAGCGAG	16
1794	RP11-977G19.11	RP11-977G19.11	Targeted lncRNA	ASO_G0257303_06	Exiqon	CTCATTTGGAAGAAGC	16
1795	RP11-977G19.11	RP11-977G19.11	Targeted lncRNA	ASO_G0257303_08	Exiqon	AAAATCTGAGTCGGAG	16
1796	RP11-9M16.2	RP11-9M16.2	Positive Control	ASO_G0235119_01	Exiqon	GAAAACTGAGGCACTC	16
1797	RP11-9M16.2	RP11-9M16.2	Positive Control	ASO_G0235119_02	Exiqon	TCCAGATCATTCCCAC	16
1798	RP11-9M16.2	RP11-9M16.2	Positive Control	ASO_G0235119_03	Exiqon	AAAACTGAGGCACTC	15
1799	RP11-9M16.2	RP11-9M16.2	Positive Control	ASO_G0235119_05	Exiqon	CCAGATCATTCCCAC	15
1800	RP11-9M16.2	RP11-9M16.2	Positive Control	ASO_G0235119_09	Exiqon	ACTCAGAACTGAATCC	16
1801	RP13-20L14.6	RP13-20L14.6	Targeted lncRNA	ASO_G0265458_01	Exiqon	ACGAGAAGCGGAAACC	16
1802	RP13-20L14.6	RP13-20L14.6	Targeted lncRNA	ASO_G0265458_02	Exiqon	AATTGGGCCGAAACGA	16
1803	RP13-20L14.6	RP13-20L14.6	Targeted lncRNA	ASO_G0265458_07	Exiqon	CGGAAACCGGCGCAAG	16
1804	RP13-20L14.6	RP13-20L14.6	Targeted lncRNA	ASO_G0265458_09	Exiqon	GAAACCGGCGCAAGGA	16
1805	RP13-20L14.6	RP13-20L14.6	Targeted lncRNA	ASO_G0265458_10	Exiqon	TTCAGGCCCCTTCACG	16
1806	RP13-20L14.6	RP13-20L14.6	Targeted lncRNA	ASO_G0265458_AD_01	GeneDesign	ACCGAGCACCCTGGAACG	18
1807	RP13-20L14.6	RP13-20L14.6	Targeted lncRNA	ASO_G0265458_AD_03	GeneDesign	CGAATTGCACCTATAG	16
1808	RP13-20L14.6	RP13-20L14.6	Targeted lncRNA	ASO_G0265458_AD_06	GeneDesign	CGTGTAGTCAGTTGGG	16
1809	RP13-20L14.6	RP13-20L14.6	Targeted lncRNA	ASO_G0265458_AD_07	GeneDesign	CGTTTATGAGTCCAAC	16
1810	RP13-20L14.6	RP13-20L14.6	Targeted lncRNA	ASO_G0265458_AD_08	GeneDesign	GCCGAGCCTACGTGAC	16
1811	LASTR	RP13-463N16.6	Targeted lncRNA	ASO_G0242147_01	Exiqon	GTAGTATGAATGAGAC	16
1812	LASTR	RP13-463N16.6	Targeted lncRNA	ASO_G0242147_05	Exiqon	ATCTTACTGCAGAATG	16
1813	LASTR	RP13-463N16.6	Targeted lncRNA	ASO_G0242147_07	Exiqon	TGCAGACCACCATAAG	16
1814	LASTR	RP13-463N16.6	Targeted lncRNA	ASO_G0242147_08	Exiqon	TTCACCCACTGTCTTC	16
1815	LASTR	RP13-463N16.6	Targeted lncRNA	ASO_G0242147_09	Exiqon	TTAACCCTGTGGAGAT	16
1816	MINCR	RP13-582O9.5	Targeted lncRNA	ASO_G0253716_01	Exiqon	CGGAAGACACGCGACC	16
1817	MINCR	RP13-582O9.5	Targeted lncRNA	ASO_G0253716_03	Exiqon	AAGCTCTTCTGCGAA	15
1818	MINCR	RP13-582O9.5	Targeted lncRNA	ASO_G0253716_04	Exiqon	GAGGCGTCGATGGCTG	16
1819	MINCR	RP13-582O9.5	Targeted lncRNA	ASO_G0253716_06	Exiqon	TCTTCTGCGAAGTTGG	16
1820	MINCR	RP13-582O9.5	Targeted lncRNA	ASO_G0253716_07	Exiqon	TGTCCCACGCGCTTAC	16
1821	TPTEP2	RP3-449O17.1	Targeted lncRNA	ASO_G0244627_01	Exiqon	GTTGGGTCAGAAAGT	15
1822	TPTEP2	RP3-449O17.1	Targeted lncRNA	ASO_G0244627_03	Exiqon	AGAATAATGGTGATGG	16
1823	TPTEP2	RP3-449O17.1	Targeted lncRNA	ASO_G0244627_05	Exiqon	GGCTAAGTGCAGGCGC	16
1824	TPTEP2	RP3-449O17.1	Targeted lncRNA	ASO_G0244627_06	Exiqon	CCAGAGGAGGAAATTC	16
1825	TPTEP2	RP3-449O17.1	Targeted lncRNA	ASO_G0244627_08	Exiqon	GAGTGATCCTGACTTC	16
1826	MIR34AHG	RP3-510D11.1	Targeted lncRNA	ASO_G0228526_01	Exiqon	TAGTGTGGATGCAACA	16
1827	MIR34AHG	RP3-510D11.1	Targeted lncRNA	ASO_G0228526_02	Exiqon	CTCTTAGACAACGCTA	16
1828	MIR34AHG	RP3-510D11.1	Targeted lncRNA	ASO_G0228526_03	Exiqon	GAAAGAACTAGCCGAG	16
1829	MIR34AHG	RP3-510D11.1	Targeted lncRNA	ASO_G0228526_06	Exiqon	GCGTGGTCACCGAGAA	16
1830	MIR34AHG	RP3-510D11.1	Targeted lncRNA	ASO_G0228526_10	Exiqon	GGACTCCCGCAAAATC	16
1831	MIR34AHG	RP3-510D11.1	Targeted lncRNA	ASO_G0228526_AD_01	GeneDesign	CGAGAGCGCGTAGTTT	16
1832	MIR34AHG	RP3-510D11.1	Targeted lncRNA	ASO_G0228526_AD_03	GeneDesign	CAGTCCGGAGAGCTCG	16
1833	MIR34AHG	RP3-510D11.1	Targeted lncRNA	ASO_G0228526_AD_04	GeneDesign	CGACGCGTCTCTCCAG	16
1834	MIR34AHG	RP3-510D11.1	Targeted lncRNA	ASO_G0228526_AD_05	GeneDesign	TATTAAAGTTGTTGGTC	17
1835	MIR34AHG	RP3-510D11.1	Targeted lncRNA	ASO_G0228526_AD_10	GeneDesign	GCATCTCCTCCACCTGAAA	19
1836	LNCTAM34A	RP3-510D11.2	Targeted lncRNA	ASO_G0234546_01	Exiqon	GCCGCAACTAATGACG	16
1837	LNCTAM34A	RP3-510D11.2	Targeted lncRNA	ASO_G0234546_02	Exiqon	ATCTGATCTGCCGTTG	16
1838	LNCTAM34A	RP3-510D11.2	Targeted lncRNA	ASO_G0234546_03	Exiqon	CGGTTGCCTCGTGAGT	16
1839	LNCTAM34A	RP3-510D11.2	Targeted lncRNA	ASO_G0234546_05	Exiqon	ACAAGAAGCCAAAGTA	16
1840	LNCTAM34A	RP3-510D11.2	Targeted lncRNA	ASO_G0234546_07	Exiqon	ATCTGGGTAGCATTCG	16
1841	LNCTAM34A	RP3-510D11.2	Targeted lncRNA	ASO_G0234546_AD_04	GeneDesign	GTGTAGGTAGAGACGG	16
1842	LNCTAM34A	RP3-510D11.2	Targeted lncRNA	ASO_G0234546_AD_05	GeneDesign	TGTAAGTTAAAGGTGTAGG	19
1843	LNCTAM34A	RP3-510D11.2	Targeted lncRNA	ASO_G0234546_AD_06	GeneDesign	AGTCCAAGGAGAATCCG	17
1844	LNCTAM34A	RP3-510D11.2	Targeted lncRNA	ASO_G0234546_AD_07	GeneDesign	TCGCATCTTGTTGAATC	17
1845	LNCTAM34A	RP3-510D11.2	Targeted lncRNA	ASO_G0234546_AD_09	GeneDesign	ATGAGAAATGAAGTGCTTA	19
1846	LINC01357	RP3-522D1.1	Targeted lncRNA	ASO_G0224167_01	Exiqon	GGGTGAGACCGACGTT	16
1847	LINC01357	RP3-522D1.1	Targeted lncRNA	ASO_G0224167_04	Exiqon	AGAACCAGTCTGTGCG	16
1848	LINC01357	RP3-522D1.1	Targeted lncRNA	ASO_G0224167_05	Exiqon	CTTCCAGAAACTAAGG	16
1849	LINC01357	RP3-522D1.1	Targeted lncRNA	ASO_G0224167_06	Exiqon	TGAGAAGCCCCGACCA	16
1850	LINC01357	RP3-522D1.1	Targeted lncRNA	ASO_G0224167_09	Exiqon	GGGCCATTGAAGGTT	15
1851	ZNF337-AS1	RP4-694B14.5	Targeted lncRNA	ASO_G0213742_01	Exiqon	CAGGTAGGTGGTTAGC	16
1852	ZNF337-AS1	RP4-694B14.5	Targeted lncRNA	ASO_G0213742_02	Exiqon	ACAAGCTTTAGTTGAG	16
1853	ZNF337-AS1	RP4-694B14.5	Targeted lncRNA	ASO_G0213742_05	Exiqon	AGAATCCAGAGGGCTA	16
1854	ZNF337-AS1	RP4-694B14.5	Targeted lncRNA	ASO_G0213742_06	Exiqon	TTCCAGAGTGACACAG	16
1855	ZNF337-AS1	RP4-694B14.5	Targeted lncRNA	ASO_G0213742_08	Exiqon	GATGCAGGCCTTTGAA	16
1856	INKA2-AS1	RP4-773A18.4	Targeted lncRNA	ASO_G0227811_01	Exiqon	GAAACTCCTTCGCGTG	16
1857	INKA2-AS1	RP4-773A18.4	Targeted lncRNA	ASO_G0227811_02	Exiqon	TCGTCATGAAGGAAGC	16
1858	INKA2-AS1	RP4-773A18.4	Targeted lncRNA	ASO_G0227811_05	Exiqon	GTAACACACCAGTCAT	16
1859	INKA2-AS1	RP4-773A18.4	Targeted lncRNA	ASO_G0227811_06	Exiqon	GAGATCCAAAGAAGTT	16
1860	INKA2-AS1	RP4-773A18.4	Targeted lncRNA	ASO_G0227811_10	Exiqon	GTGAACCGGCCAAGCG	16
1861	INKA2-AS1	RP4-773A18.4	Targeted lncRNA	ASO_G0227811_AD_01	GeneDesign	AATTACTCTCCGTGCTCT	18
1862	INKA2-AS1	RP4-773A18.4	Targeted lncRNA	ASO_G0227811_AD_03	GeneDesign	ACGTGTTCTTCGTAGT	16
1863	INKA2-AS1	RP4-773A18.4	Targeted lncRNA	ASO_G0227811_AD_04	GeneDesign	ATTACCGTGCTTACCG	16
1864	INKA2-AS1	RP4-773A18.4	Targeted lncRNA	ASO_G0227811_AD_05	GeneDesign	CACCGTTCGTGCCTTC	16
1865	INKA2-AS1	RP4-773A18.4	Targeted lncRNA	ASO_G0227811_AD_08	GeneDesign	GTAAAGTACCGACCACTG	18
1866	RP4-794H19.4	RP4-794H19.4	Targeted lncRNA	ASO_G0230812_01	Exiqon	TAACACCAGAGCTGTA	16
1867	RP4-794H19.4	RP4-794H19.4	Targeted lncRNA	ASO_G0230812_02	Exiqon	TACGTTGATAGAAATA	16
1868	RP4-794H19.4	RP4-794H19.4	Targeted lncRNA	ASO_G0230812_05	Exiqon	GACGAGTCCTTTTGGA	16
1869	RP4-794H19.4	RP4-794H19.4	Targeted lncRNA	ASO_G0230812_07	Exiqon	TCAAGGGCCTGCAATT	16
1870	RP4-794H19.4	RP4-794H19.4	Targeted lncRNA	ASO_G0230812_10	Exiqon	TGATAAGCATGATCAT	16
1871	RP5-1050D4.5	RP5-1050D4.5	Targeted lncRNA	ASO_G0262227_01	Exiqon	TCTTGGGATGCAGCGA	16
1872	RP5-1050D4.5	RP5-1050D4.5	Targeted lncRNA	ASO_G0262227_04	Exiqon	GAGTCAGTCGGCCGAG	16
1873	RP5-1050D4.5	RP5-1050D4.5	Targeted lncRNA	ASO_G0262227_07	Exiqon	CTCAGAGCCCTAGAA	15
1874	RP5-1050D4.5	RP5-1050D4.5	Targeted lncRNA	ASO_G0262227_09	Exiqon	TCGAACTGGGAGTCAG	16
1875	RP5-1050D4.5	RP5-1050D4.5	Targeted lncRNA	ASO_G0262227_10	Exiqon	CCAGACAAGGAGTCTT	16
1876	NRSN2-AS1	RP5-1103G7.4	Targeted lncRNA	ASO_G0225377_02	Exiqon	GTTGCAGTTGAGATGC	16
1877	NRSN2-AS1	RP5-1103G7.4	Targeted lncRNA	ASO_G0225377_05	Exiqon	CAGTAGGTGGCCAATA	16
1878	NRSN2-AS1	RP5-1103G7.4	Targeted lncRNA	ASO_G0225377_06	Exiqon	AGCGTCAGATGGAAGC	16
1879	NRSN2-AS1	RP5-1103G7.4	Targeted lncRNA	ASO_G0225377_07	Exiqon	GTCATTCACGAGGTTG	16
1880	NRSN2-AS1	RP5-1103G7.4	Targeted lncRNA	ASO_G0225377_08	Exiqon	CATCTGAAGACTTGAC	16
1881	NRSN2-AS1	RP5-1103G7.4	Targeted lncRNA	ASO_G0225377_AD_05	GeneDesign	CATAAACGCATCGTATTC	18
1882	NRSN2-AS1	RP5-1103G7.4	Targeted lncRNA	ASO_G0225377_AD_06	GeneDesign	CATGCTCACGACGCCG	16
1883	NRSN2-AS1	RP5-1103G7.4	Targeted lncRNA	ASO_G0225377_AD_08	GeneDesign	GTACCTATCACACACCGT	18
1884	NRSN2-AS1	RP5-1103G7.4	Targeted lncRNA	ASO_G0225377_AD_09	GeneDesign	TCCCGTCTATCATAAGTT	18
1885	NRSN2-AS1	RP5-1103G7.4	Targeted lncRNA	ASO_G0225377_AD_10	GeneDesign	TGAGTTCGTCCCCTTAAG	18
1886	ELOA-AS1	RP5-886K2.3	Targeted lncRNA	ASO_G0236810_01	Exiqon	GAACACCGATCTAGTA	16
1887	ELOA-AS1	RP5-886K2.3	Targeted lncRNA	ASO_G0236810_02	Exiqon	GAAGGACCAGCTTAGG	16
1888	ELOA-AS1	RP5-886K2.3	Targeted lncRNA	ASO_G0236810_04	Exiqon	AATTCCAGAGCAACGT	16
1889	ELOA-AS1	RP5-886K2.3	Targeted lncRNA	ASO_G0236810_07	Exiqon	AATGCTGAATTCTTAC	16
1890	ELOA-AS1	RP5-886K2.3	Targeted lncRNA	ASO_G0236810_09	Exiqon	AGTAGATGCTCGTCCA	16
1891	ELOA-AS1	RP5-886K2.3	Targeted lncRNA	ASO_G0236810_AD_02	GeneDesign	ATTAGGCACGATGAGATT	18
1892	ELOA-AS1	RP5-886K2.3	Targeted lncRNA	ASO_G0236810_AD_03	GeneDesign	CAGGTACGCTTTTGTAGG	18
1893	ELOA-AS1	RP5-886K2.3	Targeted lncRNA	ASO_G0236810_AD_06	GeneDesign	GGATCATGCGAATTAATC	18
1894	ELOA-AS1	RP5-886K2.3	Targeted lncRNA	ASO_G0236810_AD_07	GeneDesign	GGCTCGCAAAGAAACGTG	18
1895	ELOA-AS1	RP5-886K2.3	Targeted lncRNA	ASO_G0236810_AD_09	GeneDesign	TATGAAGTTCCCGCACAC	18
1896	PRR34-AS1	RP6-109B7.3	Targeted lncRNA	ASO_G0241990_01	Exiqon	CAAGCTGCAAGTAGAT	16
1897	PRR34-AS1	RP6-109B7.3	Targeted lncRNA	ASO_G0241990_05	Exiqon	GGCTCTAGAAGCTCAA	16
1898	PRR34-AS1	RP6-109B7.3	Targeted lncRNA	ASO_G0241990_06	Exiqon	TTCGCTTCCTCACAC	15
1899	PRR34-AS1	RP6-109B7.3	Targeted lncRNA	ASO_G0241990_07	Exiqon	CCTTCGCTTCCTCACA	16
1900	PRR34-AS1	RP6-109B7.3	Targeted lncRNA	ASO_G0241990_10	Exiqon	TTAACGCCAAATCGCG	16
1901	MIR222HG	RP6-99M1.2	Targeted lncRNA	ASO_G0270069_01	Exiqon	ACGCATTACTTGAACT	16
1902	MIR222HG	RP6-99M1.2	Targeted lncRNA	ASO_G0270069_02	Exiqon	TCGCAGCTTGATAAAT	16
1903	MIR222HG	RP6-99M1.2	Targeted lncRNA	ASO_G0270069_03	Exiqon	AACAGCCCATTCTGAT	16
1904	MIR222HG	RP6-99M1.2	Targeted lncRNA	ASO_G0270069_04	Exiqon	GCTCAGATTCAAGATT	16
1905	MIR222HG	RP6-99M1.2	Targeted lncRNA	ASO_G0270069_05	Exiqon	GACATCTTAATGCAGA	16
1906	MIR222HG	RP6-99M1.2	Targeted lncRNA	ASO_G0270069_AD_01	GeneDesign	AGATCACACGAGGCGCTTT	19
1907	MIR222HG	RP6-99M1.2	Targeted lncRNA	ASO_G0270069_AD_02	GeneDesign	AGTCTTTATGCGGTATTCT	19
1908	MIR222HG	RP6-99M1.2	Targeted lncRNA	ASO_G0270069_AD_03	GeneDesign	AGTTTAATCAGTAACCTAT	19
1909	MIR222HG	RP6-99M1.2	Targeted lncRNA	ASO_G0270069_AD_07	GeneDesign	CAAGTCGGTCACAACC	16
1910	MIR222HG	RP6-99M1.2	Targeted lncRNA	ASO_G0270069_AD_09	GeneDesign	ATGATATCTATTAGGGA	17
1911	APTR	RSBN1L-AS1	Targeted lncRNA	ASO_G0214293_01	Exiqon	ACGTGCGCTAGGCTCT	16
1912	APTR	RSBN1L-AS1	Targeted lncRNA	ASO_G0214293_02	Exiqon	CGGGTAGTTAAAAGGC	16
1913	APTR	RSBN1L-AS1	Targeted lncRNA	ASO_G0214293_03	Exiqon	ACAATCTGACCTCTGT	16
1914	APTR	RSBN1L-AS1	Targeted lncRNA	ASO_G0214293_04	Exiqon	CTGGATTACACACATC	16
1915	APTR	RSBN1L-AS1	Targeted lncRNA	ASO_G0214293_05	Exiqon	GTAAACTCCAATCATC	16
1916	SBF2-AS1	SBF2-AS1	Targeted lncRNA	ASO_G0246273_01	Exiqon	CAGGATCAGCCAAAGG	16
1917	SBF2-AS1	SBF2-AS1	Targeted lncRNA	ASO_G0246273_02	Exiqon	TAGAGCAAGCTTGAGT	16
1918	SBF2-AS1	SBF2-AS1	Targeted lncRNA	ASO_G0246273_03	Exiqon	TTAGTAATAGGCCTTT	16
1919	SBF2-AS1	SBF2-AS1	Targeted lncRNA	ASO_G0246273_05	Exiqon	GGTCACAAATTCAGTC	16
1920	SBF2-AS1	SBF2-AS1	Targeted lncRNA	ASO_G0246273_08	Exiqon	CAACCCACGCAGAAGA	16
1921	SBF2-AS1	SBF2-AS1	Targeted lncRNA	ASO_G0246273_AD_01	GeneDesign	AAGTTACCTTCGTCCTCG	18
1922	SBF2-AS1	SBF2-AS1	Targeted lncRNA	ASO_G0246273_AD_02	GeneDesign	ACCCTTCCACATATCCGA	18
1923	SBF2-AS1	SBF2-AS1	Targeted lncRNA	ASO_G0246273_AD_06	GeneDesign	GACATCACTCGCATTAGT	18
1924	SBF2-AS1	SBF2-AS1	Targeted lncRNA	ASO_G0246273_AD_08	GeneDesign	GTCTACGCTAACATCTTC	18
1925	SBF2-AS1	SBF2-AS1	Targeted lncRNA	ASO_G0246273_AD_09	GeneDesign	TACATAACACACGCCCTG	18
1926	SERTAD4-AS1	SERTAD4-AS1	Targeted lncRNA	ASO_G0203706_01	Exiqon	CAGTCTGTGCGTCTTC	16
1927	SERTAD4-AS1	SERTAD4-AS1	Targeted lncRNA	ASO_G0203706_02	Exiqon	GGAATAGGCGTCCTCG	16
1928	SERTAD4-AS1	SERTAD4-AS1	Targeted lncRNA	ASO_G0203706_03	Exiqon	CTCATCCTTGATCTTG	16
1929	SERTAD4-AS1	SERTAD4-AS1	Targeted lncRNA	ASO_G0203706_04	Exiqon	ACACAAATTTAATTAC	16
1930	SERTAD4-AS1	SERTAD4-AS1	Targeted lncRNA	ASO_G0203706_07	Exiqon	GCAACCGCGGGCTTCC	16
1931	SERTAD4-AS1	SERTAD4-AS1	Targeted lncRNA	ASO_G0203706_AD_02	GeneDesign	ACGGGTTTCACACGCT	16
1932	SERTAD4-AS1	SERTAD4-AS1	Targeted lncRNA	ASO_G0203706_AD_03	GeneDesign	ATATCTCGGAAGGTTC	16
1933	SERTAD4-AS1	SERTAD4-AS1	Targeted lncRNA	ASO_G0203706_AD_07	GeneDesign	CGCTTAGTCCCTCATCGT	18
1934	SERTAD4-AS1	SERTAD4-AS1	Targeted lncRNA	ASO_G0203706_AD_09	GeneDesign	TAGCAACTTTCCGAGT	16
1935	SERTAD4-AS1	SERTAD4-AS1	Targeted lncRNA	ASO_G0203706_AD_10	GeneDesign	TTTCACAGTCGGAGGATC	18
1936	SMURF2P1	SMURF2P1	Targeted lncRNA	ASO_G0248121_02	Exiqon	GAGAGTAAGAGAAAGT	16
1937	SMURF2P1	SMURF2P1	Targeted lncRNA	ASO_G0248121_04	Exiqon	AAGTGTAGTCTTCTAT	16
1938	SMURF2P1	SMURF2P1	Targeted lncRNA	ASO_G0248121_07	Exiqon	GCGAGCGTCGTCGTC	15
1939	SMURF2P1	SMURF2P1	Targeted lncRNA	ASO_G0248121_09	Exiqon	GGAGTCACCACAGAGG	16
1940	SMURF2P1	SMURF2P1	Targeted lncRNA	ASO_G0248121_10	Exiqon	CGAAGCGCGGCGGAGT	16
1941	SNAI3-AS1	SNAI3-AS1	Targeted lncRNA	ASO_G0260630_01	Exiqon	TCTTCACTCATCACAT	16
1942	SNAI3-AS1	SNAI3-AS1	Targeted lncRNA	ASO_G0260630_02	Exiqon	CACACGGAGGAAAGAT	16
1943	SNAI3-AS1	SNAI3-AS1	Targeted lncRNA	ASO_G0260630_03	Exiqon	GCATCAACCAAACGAC	16
1944	SNAI3-AS1	SNAI3-AS1	Targeted lncRNA	ASO_G0260630_07	Exiqon	GCATTCTTGCCAGACC	16
1945	SNAI3-AS1	SNAI3-AS1	Targeted lncRNA	ASO_G0260630_09	Exiqon	CACGGCAGCTCGTCG	15
1946	SNHG18	SNHG18	Targeted lncRNA	ASO_G0250786_01	Exiqon	CTAAAGAGGAATGCGT	16
1947	SNHG18	SNHG18	Targeted lncRNA	ASO_G0250786_02	Exiqon	CATCTGTGCCTCAAGT	16
1948	SNHG18	SNHG18	Targeted lncRNA	ASO_G0250786_03	Exiqon	GAGAACCCTAAAGACG	16
1949	SNHG18	SNHG18	Targeted lncRNA	ASO_G0250786_04	Exiqon	ATCTTTTAAACTTAGC	16
1950	SNHG18	SNHG18	Targeted lncRNA	ASO_G0250786_05	Exiqon	GCAATCTTAGTGAGAC	16
1951	SNHG18	SNHG18	Targeted lncRNA	ASO_G0250786_AD_03	GeneDesign	CTGCTTATATGTTGGGT	17
1952	SNHG18	SNHG18	Targeted lncRNA	ASO_G0250786_AD_04	GeneDesign	TCTGTCTAAGTTTCTGGGT	19
1953	SNHG18	SNHG18	Targeted lncRNA	ASO_G0250786_AD_07	GeneDesign	TAATCGGAATGTCTGGAAT	19
1954	SNHG18	SNHG18	Targeted lncRNA	ASO_G0250786_AD_08	GeneDesign	AGCCACGTCTGAACCGG	17
1955	SNHG18	SNHG18	Targeted lncRNA	ASO_G0250786_AD_10	GeneDesign	AAGACCACAGATACCCG	17
1956	SOCS2-AS1	SOCS2-AS1	Targeted lncRNA	ASO_G0246985_02	Exiqon	GCAAGTGAAGCAGAAT	16
1957	SOCS2-AS1	SOCS2-AS1	Targeted lncRNA	ASO_G0246985_03	Exiqon	ATTTAGGGTCTTTGGC	16
1958	SOCS2-AS1	SOCS2-AS1	Targeted lncRNA	ASO_G0246985_05	Exiqon	CTAACTTGGCAGATAA	16
1959	SOCS2-AS1	SOCS2-AS1	Targeted lncRNA	ASO_G0246985_07	Exiqon	GATCACAGGGAGTCTT	16
1960	SOCS2-AS1	SOCS2-AS1	Targeted lncRNA	ASO_G0246985_10	Exiqon	GAAACAGGACTGGAGA	16
1961	SOCS2-AS1	SOCS2-AS1	Targeted lncRNA	ASO_G0246985_AD_01	GeneDesign	CGGGATGTTTAGAGGAAC	18
1962	SOCS2-AS1	SOCS2-AS1	Targeted lncRNA	ASO_G0246985_AD_02	GeneDesign	GAAGGTTATTCCGTGATG	18
1963	SOCS2-AS1	SOCS2-AS1	Targeted lncRNA	ASO_G0246985_AD_03	GeneDesign	GCCCACCAACGCTAAT	16
1964	SOCS2-AS1	SOCS2-AS1	Targeted lncRNA	ASO_G0246985_AD_04	GeneDesign	GCGGATTTAGAGTGAGGT	18
1965	SOCS2-AS1	SOCS2-AS1	Targeted lncRNA	ASO_G0246985_AD_07	GeneDesign	TAACCGTTCATCACTGCA	18
1966	SRP14-AS1	SRP14-AS1	Targeted lncRNA	ASO_G0248508_04	Exiqon	GACTTGGAGCAAGGAG	16
1967	SRP14-AS1	SRP14-AS1	Targeted lncRNA	ASO_G0248508_07	Exiqon	AAATGCCAAGTTGGAC	16
1968	SRP14-AS1	SRP14-AS1	Targeted lncRNA	ASO_G0248508_08	Exiqon	GAGATTAAGATGACTT	16
1969	SRP14-AS1	SRP14-AS1	Targeted lncRNA	ASO_G0248508_09	Exiqon	GATCTTCCCATTTTAC	16
1970	SRP14-AS1	SRP14-AS1	Targeted lncRNA	ASO_G0248508_10	Exiqon	TCAGAAAGTGGCACTC	16
1971	ST7-AS1	ST7-AS1	Targeted lncRNA	ASO_G0227199_01	Exiqon	ATCTTGCTGAATAGAG	16
1972	ST7-AS1	ST7-AS1	Targeted lncRNA	ASO_G0227199_05	Exiqon	TTCTTCATCGTGCTA	15
1973	ST7-AS1	ST7-AS1	Targeted lncRNA	ASO_G0227199_06	Exiqon	TCAAGTCCTGCATAGT	16
1974	ST7-AS1	ST7-AS1	Targeted lncRNA	ASO_G0227199_07	Exiqon	GTCGGGAGACGGAGAA	16
1975	ST7-AS1	ST7-AS1	Targeted lncRNA	ASO_G0227199_08	Exiqon	GCTGCGTCGCTGGTGG	16
1976	STX18-AS1	STX18-AS1	Targeted lncRNA	ASO_G0247708_01	Exiqon	TCATCACATCGAGTAG	16
1977	STX18-AS1	STX18-AS1	Targeted lncRNA	ASO_G0247708_02	Exiqon	TCAAAAGTCGACTGCG	16
1978	STX18-AS1	STX18-AS1	Targeted lncRNA	ASO_G0247708_03	Exiqon	GAAGGAAGTCCGAGTA	16
1979	STX18-AS1	STX18-AS1	Targeted lncRNA	ASO_G0247708_05	Exiqon	ATTAGTGGCCGCATGC	16
1980	STX18-AS1	STX18-AS1	Targeted lncRNA	ASO_G0247708_09	Exiqon	ATCCTGCTCAAGGTGA	16
1981	SUGT1P1	SUGT1P	Targeted lncRNA	ASO_G0226823_01	Exiqon	AATGGAATTGCTTAGT	16
1982	SUGT1P1	SUGT1P	Targeted lncRNA	ASO_G0226823_03	Exiqon	TTGAATTCGCGAGACT	16
1983	SUGT1P1	SUGT1P	Targeted lncRNA	ASO_G0226823_04	Exiqon	CTAGAGCAGCAGCATA	16
1984	SUGT1P1	SUGT1P	Targeted lncRNA	ASO_G0226823_06	Exiqon	ATCAGCAGGACTGAGG	16
1985	SUGT1P1	SUGT1P	Targeted lncRNA	ASO_G0226823_08	Exiqon	AGAAGCGAAAGGACGG	16
1986	TERC	TERC	Targeted lncRNA	ASO_G0270141_01	Exiqon	GCTCTAGAATGAACGG	16
1987	TERC	TERC	Targeted lncRNA	ASO_G0270141_03	Exiqon	AGCAAAAGCACGGCGC	16
1988	TERC	TERC	Targeted lncRNA	ASO_G0270141_04	Exiqon	CTGAAAGTCAGCGAGA	16
1989	TERC	TERC	Targeted lncRNA	ASO_G0270141_05	Exiqon	CTGAAAGGCCTGAACC	16
1990	TERC	TERC	Targeted lncRNA	ASO_G0270141_07	Exiqon	AGCAGCTGACATTTTT	16
1991	TERC	TERC	Targeted lncRNA	ASO_G0270141_AD_01	GeneDesign	AACTCTTCGCGGTGGCAGT	19
1992	TERC	TERC	Targeted lncRNA	ASO_G0270141_AD_06	GeneDesign	TTTCCGCCCGCTGAAAG	17
1993	TERC	TERC	Targeted lncRNA	ASO_G0270141_AD_07	GeneDesign	GACTCGCTCCGTTCCTC	17
1994	TERC	TERC	Targeted lncRNA	ASO_G0270141_AD_09	GeneDesign	AGAGACCCGCGGCTGAC	17
1995	TERC	TERC	Targeted lncRNA	ASO_G0270141_AD_10	GeneDesign	TTCTCAGTTAGGGTTAGAC	19
1996	TMCC1-AS1	TMCC1-AS1	Targeted lncRNA	ASO_G0271270_03	Exiqon	ACATTTAACTGAAGCT	16
1997	TMCC1-AS1	TMCC1-AS1	Targeted lncRNA	ASO_G0271270_04	Exiqon	TACAGGAGCAGATTTA	16
1998	TMCC1-AS1	TMCC1-AS1	Targeted lncRNA	ASO_G0271270_05	Exiqon	AGCATTCCCACACATC	16
1999	TMCC1-AS1	TMCC1-AS1	Targeted lncRNA	ASO_G0271270_07	Exiqon	CTGGACAATTGATTTA	16
[truncated: 156 more rows]

## Sheet: Table S2B
	KD.pubID	KD.geneSymbol	perturb_id	KD_eff.Inc	Inc_flag	KD_eff.CAGE	ASO_hit	localization	geneClass	expression
1	A1BG-AS1	A1BG-AS1	ASO_G0268895_01	89.413	1	77.512	exonic	Chromatin bound	lncRNA_divergent	11.406
2	A1BG-AS1	A1BG-AS1	ASO_G0268895_02	63.181	1	11.825	exonic	Chromatin bound	lncRNA_divergent	11.406
3	A1BG-AS1	A1BG-AS1	ASO_G0268895_03	82.811	1	70.716	exonic	Chromatin bound	lncRNA_divergent	11.406
4	A1BG-AS1	A1BG-AS1	ASO_G0268895_04	54.211	0	25.581	exonic	Chromatin bound	lncRNA_divergent	11.406
5	A1BG-AS1	A1BG-AS1	ASO_G0268895_10	10.907	0	45.84	exonic	Chromatin bound	lncRNA_divergent	11.406
6	AC004980.7	AC004980.7	ASO_G0205485_01	87.316	1	75.523	exonic	Chromatin bound	pseudogene	16.738
7	AC004980.7	AC004980.7	ASO_G0205485_02	77.485	1	56.978	exonic	Chromatin bound	pseudogene	16.738
8	AC004980.7	AC004980.7	ASO_G0205485_03	72.967	1	70.205	exonic	Chromatin bound	pseudogene	16.738
9	AC004980.7	AC004980.7	ASO_G0205485_05	50.783	0	-26.261	exonic	Chromatin bound	pseudogene	16.738
10	SPRY4-AS1	AC005592.2	ASO_G0231185_01	38.88	0	79.489	exonic	Chromatin bound	lncRNA_divergent	11.469
11	SPRY4-AS1	AC005592.2	ASO_G0231185_02	69.785	1	72.334	exonic	Chromatin bound	lncRNA_divergent	11.469
12	SPRY4-AS1	AC005592.2	ASO_G0231185_03	99.337	1	68.005	exonic	Chromatin bound	lncRNA_divergent	11.469
13	SPRY4-AS1	AC005592.2	ASO_G0231185_06	43.313	0	58.431	exonic	Chromatin bound	lncRNA_divergent	11.469
14	SPRY4-AS1	AC005592.2	ASO_G0231185_09	-18.552	0	53.107	exonic	Chromatin bound	lncRNA_divergent	11.469
15	MAP4K3-DT	AC007246.3	ASO_G0231312_01	39.385	0	29.893	exonic	Chromatin bound	lncRNA_divergent	14.108
16	MAP4K3-DT	AC007246.3	ASO_G0231312_02	93.053	1	91.703	exonic	Chromatin bound	lncRNA_divergent	14.108
17	MAP4K3-DT	AC007246.3	ASO_G0231312_03	44.655	0	39.067	exonic	Chromatin bound	lncRNA_divergent	14.108
18	MAP4K3-DT	AC007246.3	ASO_G0231312_04	79.557	1	83.336	exonic	Chromatin bound	lncRNA_divergent	14.108
19	MAP4K3-DT	AC007246.3	ASO_G0231312_05	63.497	1	32.764	exonic	Chromatin bound	lncRNA_divergent	14.108
20	AC007773.2	AC007773.2	ASO_G0267213_01	80.868	1	73.738	exonic	Nuclear soluble	lncRNA_divergent	2.38
21	AC007773.2	AC007773.2	ASO_G0267213_03	86.531	1	65.434	exonic	Nuclear soluble	lncRNA_divergent	2.38
22	AC007773.2	AC007773.2	ASO_G0267213_04	62.611	1	64.761	exonic	Nuclear soluble	lncRNA_divergent	2.38
23	AC007773.2	AC007773.2	ASO_G0267213_06	56.953	1	73.619	exonic	Nuclear soluble	lncRNA_divergent	2.38
24	AC007773.2	AC007773.2	ASO_G0267213_10	78.609	1	67.785	exonic	Nuclear soluble	lncRNA_divergent	2.38
25	MYOSLID	AC007879.7	ASO_G0229647_01	-1.574	0	38.647	exonic	Chromatin bound	lncRNA_intergenic	0.971
26	MYOSLID	AC007879.7	ASO_G0229647_02	21.628	0	22.028	exonic	Chromatin bound	lncRNA_intergenic	0.971
27	MYOSLID	AC007879.7	ASO_G0229647_03	4.774	0	37.606	exonic	Chromatin bound	lncRNA_intergenic	0.971
28	MYOSLID	AC007879.7	ASO_G0229647_04	48.178	1	51.818	exonic	Chromatin bound	lncRNA_intergenic	0.971
29	MYOSLID	AC007879.7	ASO_G0229647_06	12.182	0	59.209	exonic	Chromatin bound	lncRNA_intergenic	0.971
30	MYOSLID	AC007879.7	ASO_G0229647_AD_01	50.627	0	41.654	intronic	Chromatin bound	lncRNA_intergenic	0.971
31	MYOSLID	AC007879.7	ASO_G0229647_AD_04	45.456	0	37.052	intronic	Chromatin bound	lncRNA_intergenic	0.971
32	MYOSLID	AC007879.7	ASO_G0229647_AD_05	31.084	0	8.271	intronic	Chromatin bound	lncRNA_intergenic	0.971
33	MYOSLID	AC007879.7	ASO_G0229647_AD_06	44.626	0	15.44	intronic	Chromatin bound	lncRNA_intergenic	0.971
34	MYOSLID	AC007879.7	ASO_G0229647_AD_09	76.721	1	42.679	intronic	Chromatin bound	lncRNA_intergenic	0.971
35	AC009005.2	AC009005.2	ASO_G0267751_01	38.913	0	14.176	exonic	Nuclear soluble	lncRNA_divergent	2.033
36	AC009005.2	AC009005.2	ASO_G0267751_04	18.174	0	18.369	exonic	Nuclear soluble	lncRNA_divergent	2.033
37	AC009005.2	AC009005.2	ASO_G0267751_06	29.25	0	21.975	exonic	Nuclear soluble	lncRNA_divergent	2.033
38	AC009005.2	AC009005.2	ASO_G0267751_07	51.089	0	86.236	exonic	Nuclear soluble	lncRNA_divergent	2.033
39	AC009005.2	AC009005.2	ASO_G0267751_09	55.539	0	19.872	exonic	Nuclear soluble	lncRNA_divergent	2.033
40	AC009005.2	AC009005.2	ASO_G0267751_AD_01	66.387	1	35.507	exonic	Nuclear soluble	lncRNA_divergent	2.033
41	AC009005.2	AC009005.2	ASO_G0267751_AD_02	88.203	1	77.172	exonic	Nuclear soluble	lncRNA_divergent	2.033
42	AC009005.2	AC009005.2	ASO_G0267751_AD_04	49.061	1	23.306	exonic	Nuclear soluble	lncRNA_divergent	2.033
43	AC009005.2	AC009005.2	ASO_G0267751_AD_05	74.244	1	20.156	exonic	Nuclear soluble	lncRNA_divergent	2.033
44	AC009005.2	AC009005.2	ASO_G0267751_AD_09	37.927	0	12.333	exonic	Nuclear soluble	lncRNA_divergent	2.033
45	AC009237.8	AC009237.8	ASO_G0229689_01	0	0	15.849	exonic	Chromatin bound	pseudogene	7.893
46	AC009237.8	AC009237.8	ASO_G0229689_02	0	0	10.402	exonic	Chromatin bound	pseudogene	7.893
47	AC009237.8	AC009237.8	ASO_G0229689_03	0	0	16.582	exonic	Chromatin bound	pseudogene	7.893
48	AC009237.8	AC009237.8	ASO_G0229689_04	0	0	10.05	exonic	Chromatin bound	pseudogene	7.893
49	AC009237.8	AC009237.8	ASO_G0229689_07	0	0	5.385	exonic	Chromatin bound	pseudogene	7.893
50	CHROMR	AC009948.5	ASO_G0223960_01	57.212	1	19.96	exonic	Cytoplasmic	lncRNA_intergenic	14.033
51	CHROMR	AC009948.5	ASO_G0223960_03	88.606	1	47.076	exonic	Cytoplasmic	lncRNA_intergenic	14.033
52	CHROMR	AC009948.5	ASO_G0223960_04	85.557	1	43.112	exonic	Cytoplasmic	lncRNA_intergenic	14.033
53	CHROMR	AC009948.5	ASO_G0223960_08	86.17	1	66.914	exonic	Cytoplasmic	lncRNA_intergenic	14.033
54	CHROMR	AC009948.5	ASO_G0223960_AD_01	23.872	0	15.635	intronic	Cytoplasmic	lncRNA_intergenic	14.033
55	CHROMR	AC009948.5	ASO_G0223960_AD_03	60.667	1	24.502	intronic	Cytoplasmic	lncRNA_intergenic	14.033
56	CHROMR	AC009948.5	ASO_G0223960_AD_04	53.837	1	4.84	intronic	Cytoplasmic	lncRNA_intergenic	14.033
57	CHROMR	AC009948.5	ASO_G0223960_AD_05	75.457	1	11.451	intronic	Cytoplasmic	lncRNA_intergenic	14.033
58	CHROMR	AC009948.5	ASO_G0223960_AD_10	96.212	1	77.471	exonic	Cytoplasmic	lncRNA_intergenic	14.033
59	ZNF232-AS1	AC012146.7	ASO_G0234327_01	72.173	1	69.178	exonic	Cytoplasmic	lncRNA_divergent	14.884
60	ZNF232-AS1	AC012146.7	ASO_G0234327_06	9.1	0	17.396	exonic	Cytoplasmic	lncRNA_divergent	14.884
61	ZNF232-AS1	AC012146.7	ASO_G0234327_07	67.549	1	55.795	exonic	Cytoplasmic	lncRNA_divergent	14.884
62	ZNF232-AS1	AC012146.7	ASO_G0234327_08	-28.878	0	41.012	exonic	Cytoplasmic	lncRNA_divergent	14.884
63	ZNF232-AS1	AC012146.7	ASO_G0234327_10	-5.144	0	28.882	exonic	Cytoplasmic	lncRNA_divergent	14.884
64	LINC01535	AC012309.5	ASO_G0226686_01	34.45	0	32.949	exonic	Chromatin bound	lncRNA_intergenic	4.2
65	LINC01535	AC012309.5	ASO_G0226686_03	11.426	0	22.583	exonic	Chromatin bound	lncRNA_intergenic	4.2
66	LINC01535	AC012309.5	ASO_G0226686_04	-14.429	0	7.406	exonic	Chromatin bound	lncRNA_intergenic	4.2
67	LINC01535	AC012309.5	ASO_G0226686_05	48.189	0	18.003	exonic	Chromatin bound	lncRNA_intergenic	4.2
68	LINC01535	AC012309.5	ASO_G0226686_07	75.72	1	46.523	exonic	Chromatin bound	lncRNA_intergenic	4.2
69	LINC01578	AC013394.2	ASO_G0272888_01	4.214	0	30.255	exonic	Cytoplasmic	lncRNA_sense_intronic	52.322
70	LINC01578	AC013394.2	ASO_G0272888_02	32.732	0	26.636	exonic	Cytoplasmic	lncRNA_sense_intronic	52.322
71	LINC01578	AC013394.2	ASO_G0272888_04	18.926	0	59.942	exonic	Cytoplasmic	lncRNA_sense_intronic	52.322
72	LINC01578	AC013394.2	ASO_G0272888_05	24.232	0	-22.632	exonic	Cytoplasmic	lncRNA_sense_intronic	52.322
73	LINC01578	AC013394.2	ASO_G0272888_08	50.894	0	40.811	exonic	Cytoplasmic	lncRNA_sense_intronic	52.322
74	LINC01578	AC013394.2	ASO_G0272888_AD_04	71.473	1	15.14	exonic	Cytoplasmic	lncRNA_sense_intronic	52.322
75	LINC01578	AC013394.2	ASO_G0272888_AD_06	92.828	1	56.201	exonic	Cytoplasmic	lncRNA_sense_intronic	52.322
76	LINC01578	AC013394.2	ASO_G0272888_AD_07	98.923	1	95.399	exonic	Cytoplasmic	lncRNA_sense_intronic	52.322
77	LINC01578	AC013394.2	ASO_G0272888_AD_09	74.809	1	3.328	intronic	Cytoplasmic	lncRNA_sense_intronic	52.322
78	LINC01578	AC013394.2	ASO_G0272888_AD_10	92.71	1	77.501	exonic	Cytoplasmic	lncRNA_sense_intronic	52.322
79	AC016747.3	AC016747.3	ASO_G0212978_01	82.925	1	59.568	exonic	Cytoplasmic	lncRNA_divergent	14.125
80	AC016747.3	AC016747.3	ASO_G0212978_02	89.071	1	80.88	exonic	Cytoplasmic	lncRNA_divergent	14.125
81	AC016747.3	AC016747.3	ASO_G0212978_03	79.909	1	64.611	exonic	Cytoplasmic	lncRNA_divergent	14.125
82	AC016747.3	AC016747.3	ASO_G0212978_04	63.908	1	63.49	exonic	Cytoplasmic	lncRNA_divergent	14.125
83	AC016747.3	AC016747.3	ASO_G0212978_06	31.829	0	26.027	exonic	Cytoplasmic	lncRNA_divergent	14.125
84	LINC01116	AC017048.3	ASO_G0163364_01	62.449	1	30.269	exonic	Cytoplasmic	lncRNA_intergenic	4.805
85	LINC01116	AC017048.3	ASO_G0163364_02	43.941	0	49.533	exonic	Cytoplasmic	lncRNA_intergenic	4.805
86	LINC01116	AC017048.3	ASO_G0163364_03	63.928	1	60.111	exonic	Cytoplasmic	lncRNA_intergenic	4.805
87	LINC01116	AC017048.3	ASO_G0163364_04	77.664	1	92.009	exonic	Cytoplasmic	lncRNA_intergenic	4.805
88	LINC01116	AC017048.3	ASO_G0163364_06	86.575	1	75.993	exonic	Cytoplasmic	lncRNA_intergenic	4.805
89	LINC01116	AC017048.3	ASO_G0163364_AD_01	88.488	1	90.559	exonic	Cytoplasmic	lncRNA_intergenic	4.805
90	LINC01116	AC017048.3	ASO_G0163364_AD_02	73.049	1	50.249	exonic	Cytoplasmic	lncRNA_intergenic	4.805
91	LINC01116	AC017048.3	ASO_G0163364_AD_03	46.879	0	47.72	intronic	Cytoplasmic	lncRNA_intergenic	4.805
92	LINC01116	AC017048.3	ASO_G0163364_AD_09	72.115	1	57.721	intronic	Cytoplasmic	lncRNA_intergenic	4.805
93	LINC01116	AC017048.3	ASO_G0163364_AD_10	73.37	1	53.544	exonic	Cytoplasmic	lncRNA_intergenic	4.805
94	LINC01117	AC017048.4	ASO_G0224577_01	83.985	0	64.019	exonic	Chromatin bound	lncRNA_intergenic	1.863
95	LINC01117	AC017048.4	ASO_G0224577_02	67.93	1	73.349	exonic	Chromatin bound	lncRNA_intergenic	1.863
96	LINC01117	AC017048.4	ASO_G0224577_03	50.266	0	22.233	exonic	Chromatin bound	lncRNA_intergenic	1.863
97	LINC01117	AC017048.4	ASO_G0224577_04	72.388	0	32.2	exonic	Chromatin bound	lncRNA_intergenic	1.863
98	LINC01117	AC017048.4	ASO_G0224577_05	78.116	1	60.09	exonic	Chromatin bound	lncRNA_intergenic	1.863
99	LINC01117	AC017048.4	ASO_G0224577_AD_02	-63.146	0	0.11	exonic	Chromatin bound	lncRNA_intergenic	1.863
100	LINC01117	AC017048.4	ASO_G0224577_AD_05	62.575	1	79.08	intronic	Chromatin bound	lncRNA_intergenic	1.863
101	LINC01117	AC017048.4	ASO_G0224577_AD_08	90.976	1	-4.31421e+07	intronic	Chromatin bound	lncRNA_intergenic	1.863
102	LINC01117	AC017048.4	ASO_G0224577_AD_09	54.644	0	55.355	intronic	Chromatin bound	lncRNA_intergenic	1.863
103	LINC01117	AC017048.4	ASO_G0224577_AD_10	-38.276	0	4.732	intronic	Chromatin bound	lncRNA_intergenic	1.863
104	AC018464.3	AC018464.3	ASO_G0234520_01	44.038	0	36.004	exonic	Chromatin bound	lncRNA_intergenic	0.438
105	AC018464.3	AC018464.3	ASO_G0234520_04	61.855	1	16.076	exonic	Chromatin bound	lncRNA_intergenic	0.438
106	AC018464.3	AC018464.3	ASO_G0234520_05	50.215	0	-4.553	exonic	Chromatin bound	lncRNA_intergenic	0.438
107	AC018464.3	AC018464.3	ASO_G0234520_06	39.15	0	2.694	exonic	Chromatin bound	lncRNA_intergenic	0.438
108	AC018464.3	AC018464.3	ASO_G0234520_08	61.813	1	42.346	exonic	Chromatin bound	lncRNA_intergenic	0.438
109	LSP1P4	AC027612.6	ASO_G0143429_01	68.106	0	-19.349	exonic	Cytoplasmic	pseudogene	70.605
110	LSP1P4	AC027612.6	ASO_G0143429_03	64.68	1	40.73	exonic	Cytoplasmic	pseudogene	70.605
111	LSP1P4	AC027612.6	ASO_G0143429_04	54.654	1	52.72	exonic	Cytoplasmic	pseudogene	70.605
112	LSP1P4	AC027612.6	ASO_G0143429_05	72.395	0	69.254	exonic	Cytoplasmic	pseudogene	70.605
113	LSP1P4	AC027612.6	ASO_G0143429_06	20.527	0	-0.196	exonic	Cytoplasmic	pseudogene	70.605
114	LSP1P4	AC027612.6	ASO_G0143429_AD_01	53.805	1	45.064	exonic	Cytoplasmic	pseudogene	70.605
115	LSP1P4	AC027612.6	ASO_G0143429_AD_02	75.405	1	50.037	exonic	Cytoplasmic	pseudogene	70.605
116	LSP1P4	AC027612.6	ASO_G0143429_AD_03	66.202	1	45.075	exonic	Cytoplasmic	pseudogene	70.605
117	LSP1P4	AC027612.6	ASO_G0143429_AD_05	63.092	1	37.212	exonic	Cytoplasmic	pseudogene	70.605
118	LSP1P4	AC027612.6	ASO_G0143429_AD_06	79.032	1	43.215	exonic	Cytoplasmic	pseudogene	70.605
119	AC046143.3	AC046143.3	ASO_G0229334_03	2.463	0	16.727	exonic	Cytoplasmic	lncRNA_divergent	1.906
120	AC046143.3	AC046143.3	ASO_G0229334_05	-23.221	0	-6.187	exonic	Cytoplasmic	lncRNA_divergent	1.906
121	AC046143.3	AC046143.3	ASO_G0229334_06	6.537	0	16.016	exonic	Cytoplasmic	lncRNA_divergent	1.906
122	AC046143.3	AC046143.3	ASO_G0229334_08	4.679	0	1.902	exonic	Cytoplasmic	lncRNA_divergent	1.906
123	AC084219.4	AC084219.4	ASO_G0186019_01	34.905	0	33.328	exonic	Cytoplasmic	lncRNA_divergent	1.936
124	AC084219.4	AC084219.4	ASO_G0186019_02	-19.703	0	28.645	exonic	Cytoplasmic	lncRNA_divergent	1.936
125	AC084219.4	AC084219.4	ASO_G0186019_03	22.242	0	25.839	exonic	Cytoplasmic	lncRNA_divergent	1.936
126	AC084219.4	AC084219.4	ASO_G0186019_06	14.612	0	19.058	exonic	Cytoplasmic	lncRNA_divergent	1.936
127	AC084219.4	AC084219.4	ASO_G0186019_09	5.278	0	31.37	exonic	Cytoplasmic	lncRNA_divergent	1.936
128	ZFAND2A-DT	AC091729.9	ASO_G0229043_01	64.671	1	19.572	exonic	Nuclear soluble	lncRNA_divergent	7.114
129	ZFAND2A-DT	AC091729.9	ASO_G0229043_02	44.494	0	55.012	exonic	Nuclear soluble	lncRNA_divergent	7.114
130	ZFAND2A-DT	AC091729.9	ASO_G0229043_03	36.484	0	36.311	exonic	Nuclear soluble	lncRNA_divergent	7.114
131	ZFAND2A-DT	AC091729.9	ASO_G0229043_06	61.31	1	28.333	exonic	Nuclear soluble	lncRNA_divergent	7.114
132	ZFAND2A-DT	AC091729.9	ASO_G0229043_07	97.412	1	91.325	exonic	Nuclear soluble	lncRNA_divergent	7.114
133	ZFAND2A-DT	AC091729.9	ASO_G0229043_AD_01	60.298	1	-4.76971e+07	exonic	Nuclear soluble	lncRNA_divergent	7.114
134	ZFAND2A-DT	AC091729.9	ASO_G0229043_AD_04	42.553	0	26.242	exonic	Nuclear soluble	lncRNA_divergent	7.114
135	ZFAND2A-DT	AC091729.9	ASO_G0229043_AD_05	58.829	0	70.011	exonic	Nuclear soluble	lncRNA_divergent	7.114
136	ZFAND2A-DT	AC091729.9	ASO_G0229043_AD_06	45.035	0	17.891	exonic	Nuclear soluble	lncRNA_divergent	7.114
137	ZFAND2A-DT	AC091729.9	ASO_G0229043_AD_10	67.057	1	54.945	exonic	Nuclear soluble	lncRNA_divergent	7.114
138	ZNF529-AS1	AC092295.7	ASO_G0233527_01	44.14	0	47.351	exonic	Chromatin bound	lncRNA_divergent	8.619
139	ZNF529-AS1	AC092295.7	ASO_G0233527_02	47.155	0	63.986	exonic	Chromatin bound	lncRNA_divergent	8.619
140	ZNF529-AS1	AC092295.7	ASO_G0233527_03	18.743	0	58.473	exonic	Chromatin bound	lncRNA_divergent	8.619
141	ZNF529-AS1	AC092295.7	ASO_G0233527_05	47.435	1	57.957	exonic	Chromatin bound	lncRNA_divergent	8.619
142	ZNF529-AS1	AC092295.7	ASO_G0233527_07	59.378	1	69.651	exonic	Chromatin bound	lncRNA_divergent	8.619
143	ITGA9-AS1	AC093415.2	ASO_G0235257_01	66.499	1	24.296	exonic	Chromatin bound	lncRNA_divergent	9.312
144	ITGA9-AS1	AC093415.2	ASO_G0235257_04	38.832	0	43.592	exonic	Chromatin bound	lncRNA_divergent	9.312
145	ITGA9-AS1	AC093415.2	ASO_G0235257_06	30.744	0	24.695	exonic	Chromatin bound	lncRNA_divergent	9.312
146	ITGA9-AS1	AC093415.2	ASO_G0235257_07	56.597	0	23.562	exonic	Chromatin bound	lncRNA_divergent	9.312
147	ITGA9-AS1	AC093415.2	ASO_G0235257_09	58.94	1	21.228	exonic	Chromatin bound	lncRNA_divergent	9.312
148	AC093627.10	AC093627.10	ASO_G0240859_03	41.187	0	46.347	exonic	Cytoplasmic	lncRNA_intergenic	2.228
149	AC093627.10	AC093627.10	ASO_G0240859_04	30.718	0	27.452	exonic	Cytoplasmic	lncRNA_intergenic	2.228
150	AC093627.10	AC093627.10	ASO_G0240859_05	26.512	0	-0.089	exonic	Cytoplasmic	lncRNA_intergenic	2.228
151	AC093627.10	AC093627.10	ASO_G0240859_08	39.171	0	26.396	exonic	Cytoplasmic	lncRNA_intergenic	2.228
152	AC093627.10	AC093627.10	ASO_G0240859_09	29.693	0	44.967	exonic	Cytoplasmic	lncRNA_intergenic	2.228
153	AC093627.9	AC093627.9	ASO_G0242474_01	47.488	1	58.71	exonic	Nuclear soluble	lncRNA_intergenic	3.579
154	AC093627.9	AC093627.9	ASO_G0242474_02	67.731	1	34.211	exonic	Nuclear soluble	lncRNA_intergenic	3.579
155	AC093627.9	AC093627.9	ASO_G0242474_04	35.477	0	54.206	exonic	Nuclear soluble	lncRNA_intergenic	3.579
156	AC093627.9	AC093627.9	ASO_G0242474_05	43.088	0	39.991	exonic	Nuclear soluble	lncRNA_intergenic	3.579
157	AC093627.9	AC093627.9	ASO_G0242474_06	67.855	1	28.942	exonic	Nuclear soluble	lncRNA_intergenic	3.579
158	RNASEH1-AS1	AC108488.3	ASO_G0234171_01	76.461	1	64.288	exonic	Cytoplasmic	lncRNA_divergent	18.294
159	RNASEH1-AS1	AC108488.3	ASO_G0234171_02	86.159	1	79.83	exonic	Cytoplasmic	lncRNA_divergent	18.294
160	RNASEH1-AS1	AC108488.3	ASO_G0234171_03	62.72	1	59.256	exonic	Cytoplasmic	lncRNA_divergent	18.294
161	RNASEH1-AS1	AC108488.3	ASO_G0234171_06	76.737	1	87.917	exonic	Cytoplasmic	lncRNA_divergent	18.294
162	RNASEH1-AS1	AC108488.3	ASO_G0234171_09	73.964	1	79.226	exonic	Cytoplasmic	lncRNA_divergent	18.294
163	AC108488.4	AC108488.4	ASO_G0242282_06	6.808	0	5.993	exonic	Chromatin bound	lncRNA_sense_intronic	2.241
164	AC108488.4	AC108488.4	ASO_G0242282_07	29.873	0	31.39	exonic	Chromatin bound	lncRNA_sense_intronic	2.241
165	AC108488.4	AC108488.4	ASO_G0242282_08	28.817	0	24.897	exonic	Chromatin bound	lncRNA_sense_intronic	2.241
166	AC108488.4	AC108488.4	ASO_G0242282_09	23.314	0	31.807	exonic	Chromatin bound	lncRNA_sense_intronic	2.241
167	AC108488.4	AC108488.4	ASO_G0242282_10	50.189	1	47.264	exonic	Chromatin bound	lncRNA_sense_intronic	2.241
168	AC112721.2	AC112721.2	ASO_G0222032_01	62.397	1	0	exonic	other	lncRNA_intergenic	2.644
169	AC112721.2	AC112721.2	ASO_G0222032_02	58.624	0	0	exonic	other	lncRNA_intergenic	2.644
170	AC112721.2	AC112721.2	ASO_G0222032_03	77.373	1	0	exonic	other	lncRNA_intergenic	2.644
171	AC112721.2	AC112721.2	ASO_G0222032_06	65.237	1	0	exonic	other	lncRNA_intergenic	2.644
172	AC112721.2	AC112721.2	ASO_G0222032_10	30.118	0	0	exonic	other	lncRNA_intergenic	2.644
173	AC124789.1	AC124789.1	ASO_G0260833_01	41.92	0	11.604	exonic	Nuclear soluble	lncRNA_antisense	20.43
174	AC124789.1	AC124789.1	ASO_G0260833_02	29.212	0	14.799	exonic	Nuclear soluble	lncRNA_antisense	20.43
175	AC124789.1	AC124789.1	ASO_G0260833_03	15.821	0	32.324	exonic	Nuclear soluble	lncRNA_antisense	20.43
176	AC124789.1	AC124789.1	ASO_G0260833_06	79.006	1	80.075	exonic	Nuclear soluble	lncRNA_antisense	20.43
177	AC124789.1	AC124789.1	ASO_G0260833_07	39.192	0	14.755	exonic	Nuclear soluble	lncRNA_antisense	20.43
178	AC124789.1	AC124789.1	ASO_G0260833_AD_01	0	0	22.524	exonic	Nuclear soluble	lncRNA_antisense	20.43
179	AC124789.1	AC124789.1	ASO_G0260833_AD_05	0	0	4.657	intronic	Nuclear soluble	lncRNA_antisense	20.43
180	AC124789.1	AC124789.1	ASO_G0260833_AD_06	0	0	38.705	exonic	Nuclear soluble	lncRNA_antisense	20.43
181	AC124789.1	AC124789.1	ASO_G0260833_AD_07	0	0	7.735	exonic	Nuclear soluble	lncRNA_antisense	20.43
182	AC124789.1	AC124789.1	ASO_G0260833_AD_10	0	0	44.003	exonic	Nuclear soluble	lncRNA_antisense	20.43
183	AC144652.1	AC144652.1	ASO_G0273117_01	12.481	0	13.488	exonic	Nuclear soluble	lncRNA_divergent	2.861
184	AC144652.1	AC144652.1	ASO_G0273117_03	5.416	0	22.526	exonic	Nuclear soluble	lncRNA_divergent	2.861
185	AC144652.1	AC144652.1	ASO_G0273117_06	17.276	0	20.629	exonic	Nuclear soluble	lncRNA_divergent	2.861
186	AC144652.1	AC144652.1	ASO_G0273117_09	-40.957	0	-1.077	exonic	Nuclear soluble	lncRNA_divergent	2.861
187	AC144652.1	AC144652.1	ASO_G0273117_10	54.629	1	29.266	exonic	Nuclear soluble	lncRNA_divergent	2.861
188	AMZ2P1	AMZ2P1	ASO_G0214174_02	92.191	1	86.035	exonic	Chromatin bound	pseudogene	5.078
189	AMZ2P1	AMZ2P1	ASO_G0214174_03	26.435	0	18.794	exonic	Chromatin bound	pseudogene	5.078
190	AMZ2P1	AMZ2P1	ASO_G0214174_05	25.194	0	14.351	exonic	Chromatin bound	pseudogene	5.078
191	AMZ2P1	AMZ2P1	ASO_G0214174_06	73.313	1	59.965	exonic	Chromatin bound	pseudogene	5.078
192	AMZ2P1	AMZ2P1	ASO_G0214174_09	38.755	0	14.951	exonic	Chromatin bound	pseudogene	5.078
193	AP000704.5	AP000704.5	ASO_G0224790_02	0	0	8.32	exonic	Nuclear soluble	lncRNA_divergent	1.842
194	AP000704.5	AP000704.5	ASO_G0224790_03	0	0	18.251	exonic	Nuclear soluble	lncRNA_divergent	1.842
195	AP000704.5	AP000704.5	ASO_G0224790_07	0	0	37.028	exonic	Nuclear soluble	lncRNA_divergent	1.842
196	AP000704.5	AP000704.5	ASO_G0224790_08	0	0	62.085	exonic	Nuclear soluble	lncRNA_divergent	1.842
197	AP000704.5	AP000704.5	ASO_G0224790_10	0	0	28.426	exonic	Nuclear soluble	lncRNA_divergent	1.842
198	FAM111A-DT	AP001258.4	ASO_G0245571_01	32.242	0	28.725	exonic	Cytoplasmic	lncRNA_divergent	0.179
199	FAM111A-DT	AP001258.4	ASO_G0245571_03	37.786	0	56.876	exonic	Cytoplasmic	lncRNA_divergent	0.179
200	FAM111A-DT	AP001258.4	ASO_G0245571_05	23.674	0	25.781	exonic	Cytoplasmic	lncRNA_divergent	0.179
201	FAM111A-DT	AP001258.4	ASO_G0245571_06	75.367	1	68.637	exonic	Cytoplasmic	lncRNA_divergent	0.179
202	FAM111A-DT	AP001258.4	ASO_G0245571_08	61.423	1	23.142	exonic	Cytoplasmic	lncRNA_divergent	0.179
203	FAM111A-DT	AP001258.4	ASO_G0245571_AD_01	36.971	0	8.804	exonic	Cytoplasmic	lncRNA_divergent	0.179
204	FAM111A-DT	AP001258.4	ASO_G0245571_AD_02	55.625	0	23.772	intronic	Cytoplasmic	lncRNA_divergent	0.179
205	FAM111A-DT	AP001258.4	ASO_G0245571_AD_03	88.286	1	42.697	intronic	Cytoplasmic	lncRNA_divergent	0.179
206	FAM111A-DT	AP001258.4	ASO_G0245571_AD_07	38.854	0	13.137	intronic	Cytoplasmic	lncRNA_divergent	0.179
207	FAM111A-DT	AP001258.4	ASO_G0245571_AD_09	83.487	1	14.353	intronic	Cytoplasmic	lncRNA_divergent	0.179
208	ARHGAP5-AS1	ARHGAP5-AS1	ASO_G0258655_01	22.36	0	23.138	exonic	Cytoplasmic	lncRNA_divergent	1.579
209	ARHGAP5-AS1	ARHGAP5-AS1	ASO_G0258655_02	20.307	0	19.401	exonic	Cytoplasmic	lncRNA_divergent	1.579
210	ARHGAP5-AS1	ARHGAP5-AS1	ASO_G0258655_05	8.688	0	26.21	exonic	Cytoplasmic	lncRNA_divergent	1.579
211	ARHGAP5-AS1	ARHGAP5-AS1	ASO_G0258655_07	30.483	0	-4.55	exonic	Cytoplasmic	lncRNA_divergent	1.579
212	ARHGAP5-AS1	ARHGAP5-AS1	ASO_G0258655_08	59.602	1	43.693	exonic	Cytoplasmic	lncRNA_divergent	1.579
213	BOLA3-AS1	BOLA3-AS1	ASO_G0225439_01	40.596	0	1.161	exonic	Cytoplasmic	lncRNA_divergent	6.184
214	BOLA3-AS1	BOLA3-AS1	ASO_G0225439_03	53.924	1	37.409	exonic	Cytoplasmic	lncRNA_divergent	6.184
215	BOLA3-AS1	BOLA3-AS1	ASO_G0225439_06	72.526	1	79.85	exonic	Cytoplasmic	lncRNA_divergent	6.184
216	BOLA3-AS1	BOLA3-AS1	ASO_G0225439_08	43.095	0	8.36	exonic	Cytoplasmic	lncRNA_divergent	6.184
217	BOLA3-AS1	BOLA3-AS1	ASO_G0225439_09	53.679	1	30.964	exonic	Cytoplasmic	lncRNA_divergent	6.184
218	BOLA3-AS1	BOLA3-AS1	ASO_G0225439_AD_01	39.541	0	17.04	exonic	Cytoplasmic	lncRNA_divergent	6.184
219	BOLA3-AS1	BOLA3-AS1	ASO_G0225439_AD_02	67.586	1	19.724	exonic	Cytoplasmic	lncRNA_divergent	6.184
220	BOLA3-AS1	BOLA3-AS1	ASO_G0225439_AD_03	36.47	0	4.132	exonic	Cytoplasmic	lncRNA_divergent	6.184
221	BOLA3-AS1	BOLA3-AS1	ASO_G0225439_AD_04	45.893	1	21.177	intronic	Cytoplasmic	lncRNA_divergent	6.184
222	BOLA3-AS1	BOLA3-AS1	ASO_G0225439_AD_08	72.992	1	52.533	exonic	Cytoplasmic	lncRNA_divergent	6.184
223	BX322557.10	BX322557.10	ASO_G0215447_01	94.669	1	86.186	exonic	Nuclear soluble	lncRNA_divergent	14.648
224	BX322557.10	BX322557.10	ASO_G0215447_02	46.74	1	14.089	exonic	Nuclear soluble	lncRNA_divergent	14.648
225	BX322557.10	BX322557.10	ASO_G0215447_03	74.181	1	62.18	exonic	Nuclear soluble	lncRNA_divergent	14.648
226	BX322557.10	BX322557.10	ASO_G0215447_05	37.159	0	10.803	exonic	Nuclear soluble	lncRNA_divergent	14.648
227	BX322557.10	BX322557.10	ASO_G0215447_08	83.243	1	42.967	exonic	Nuclear soluble	lncRNA_divergent	14.648
228	C11orf95	C11orf95	ASO_G0188070_01	17.09	0	19.451	exonic	Cytoplasmic	lncRNA_divergent	18.244
229	C11orf95	C11orf95	ASO_G0188070_02	52.842	0	27.837	exonic	Cytoplasmic	lncRNA_divergent	18.244
230	C11orf95	C11orf95	ASO_G0188070_03	58.279	1	41.891	exonic	Cytoplasmic	lncRNA_divergent	18.244
231	C11orf95	C11orf95	ASO_G0188070_04	29.553	0	-18.948	exonic	Cytoplasmic	lncRNA_divergent	18.244
232	C11orf95	C11orf95	ASO_G0188070_05	73.587	1	37.25	exonic	Cytoplasmic	lncRNA_divergent	18.244
233	C11orf95	C11orf95	ASO_G0188070_AD_02	79.893	1	49.621	exonic	Cytoplasmic	lncRNA_divergent	18.244
234	C11orf95	C11orf95	ASO_G0188070_AD_05	93.198	1	89.703	intronic	Cytoplasmic	lncRNA_divergent	18.244
235	C11orf95	C11orf95	ASO_G0188070_AD_06	10.659	0	32.694	exonic	Cytoplasmic	lncRNA_divergent	18.244
236	C11orf95	C11orf95	ASO_G0188070_AD_07	67.746	1	42.998	exonic	Cytoplasmic	lncRNA_divergent	18.244
237	C11orf95	C11orf95	ASO_G0188070_AD_08	18.652	0	6.639	exonic	Cytoplasmic	lncRNA_divergent	18.244
238	PCOTH	C1QTNF9B-AS1	ASO_G0205861_03	66.07	1	51.004	exonic	Cytoplasmic	lncRNA_divergent	4.851
239	PCOTH	C1QTNF9B-AS1	ASO_G0205861_04	42.399	1	-1.874	exonic	Cytoplasmic	lncRNA_divergent	4.851
240	PCOTH	C1QTNF9B-AS1	ASO_G0205861_05	74.923	1	59.588	exonic	Cytoplasmic	lncRNA_divergent	4.851
241	PCOTH	C1QTNF9B-AS1	ASO_G0205861_07	74.766	1	44.032	exonic	Cytoplasmic	lncRNA_divergent	4.851
242	PCOTH	C1QTNF9B-AS1	ASO_G0205861_10	59.911	1	21.759	exonic	Cytoplasmic	lncRNA_divergent	4.851
243	CATG00000011013.1	CATG00000011013.1	ASO_C0018982_01	62.884	1	33.489	exonic	Nuclear soluble	lncRNA_antisense	3.98
244	CATG00000011013.1	CATG00000011013.1	ASO_C0018982_02	48.012	0	11.566	exonic	Nuclear soluble	lncRNA_antisense	3.98
245	CATG00000011013.1	CATG00000011013.1	ASO_C0018982_04	45.247	0	12.865	exonic	Nuclear soluble	lncRNA_antisense	3.98
246	CATG00000011013.1	CATG00000011013.1	ASO_C0018982_06	43.897	0	41.194	exonic	Nuclear soluble	lncRNA_antisense	3.98
247	CATG00000011013.1	CATG00000011013.1	ASO_C0018982_09	41.2	1	23.56	exonic	Nuclear soluble	lncRNA_antisense	3.98
248	CATG00000016989.1	CATG00000016989.1	ASO_C0020443_01	44.475	0	25.925	exonic	Cytoplasmic	lncRNA_intergenic	2.855
249	CATG00000016989.1	CATG00000016989.1	ASO_C0020443_02	36.353	0	28.077	exonic	Cytoplasmic	lncRNA_intergenic	2.855
250	CATG00000016989.1	CATG00000016989.1	ASO_C0020443_03	53.986	0	70.415	exonic	Cytoplasmic	lncRNA_intergenic	2.855
251	CATG00000016989.1	CATG00000016989.1	ASO_C0020443_06	56.064	1	70.796	exonic	Cytoplasmic	lncRNA_intergenic	2.855
252	CATG00000016989.1	CATG00000016989.1	ASO_C0020443_10	18.82	0	44.604	exonic	Cytoplasmic	lncRNA_intergenic	2.855
253	CATG00000020700.1	CATG00000020700.1	ASO_C0020984_01	66.578	1	43.811	exonic	Chromatin bound	lncRNA_intergenic	1.228
254	CATG00000020700.1	CATG00000020700.1	ASO_C0020984_02	87.393	1	74.412	exonic	Chromatin bound	lncRNA_intergenic	1.228
255	CATG00000020700.1	CATG00000020700.1	ASO_C0020984_05	38.237	0	40.041	exonic	Chromatin bound	lncRNA_intergenic	1.228
256	CATG00000020700.1	CATG00000020700.1	ASO_C0020984_08	-2.63	0	49.526	exonic	Chromatin bound	lncRNA_intergenic	1.228
257	CATG00000020700.1	CATG00000020700.1	ASO_C0020984_09	74.73	1	70.065	exonic	Chromatin bound	lncRNA_intergenic	1.228
258	CATG00000034824.1	CATG00000034824.1	ASO_C0025760_01	27.898	0	33.586	exonic	Cytoplasmic	lncRNA_antisense	15.848
259	CATG00000034824.1	CATG00000034824.1	ASO_C0025760_02	29.495	0	16.681	exonic	Cytoplasmic	lncRNA_antisense	15.848
260	CATG00000034824.1	CATG00000034824.1	ASO_C0025760_03	20.647	0	29.059	exonic	Cytoplasmic	lncRNA_antisense	15.848
261	CATG00000034824.1	CATG00000034824.1	ASO_C0025760_07	43.638	0	35.633	exonic	Cytoplasmic	lncRNA_antisense	15.848
262	CATG00000034824.1	CATG00000034824.1	ASO_C0025760_10	49.287	0	-7.253	exonic	Cytoplasmic	lncRNA_antisense	15.848
263	CATG00000035089.1	CATG00000035089.1	ASO_C0025854_01	0	0	24.857	exonic	Cytoplasmic	lncRNA_intergenic	2.488
264	CATG00000035089.1	CATG00000035089.1	ASO_C0025854_02	0	0	33.415	exonic	Cytoplasmic	lncRNA_intergenic	2.488
265	CATG00000035089.1	CATG00000035089.1	ASO_C0025854_04	0	0	5.215	exonic	Cytoplasmic	lncRNA_intergenic	2.488
266	CATG00000035089.1	CATG00000035089.1	ASO_C0025854_05	0	0	14.671	exonic	Cytoplasmic	lncRNA_intergenic	2.488
267	CATG00000035089.1	CATG00000035089.1	ASO_C0025854_09	0	0	20.886	exonic	Cytoplasmic	lncRNA_intergenic	2.488
268	CATG00000073509.1	CATG00000073509.1	ASO_C0007786_01	54.436	1	38.208	exonic	Cytoplasmic	lncRNA_intergenic	5.188
269	CATG00000073509.1	CATG00000073509.1	ASO_C0007786_02	58.947	1	47.309	exonic	Cytoplasmic	lncRNA_intergenic	5.188
270	CATG00000073509.1	CATG00000073509.1	ASO_C0007786_03	49.749	1	54.433	exonic	Cytoplasmic	lncRNA_intergenic	5.188
271	CATG00000073509.1	CATG00000073509.1	ASO_C0007786_04	52.301	1	21.226	exonic	Cytoplasmic	lncRNA_intergenic	5.188
272	CATG00000073509.1	CATG00000073509.1	ASO_C0007786_08	61.123	1	45.678	exonic	Cytoplasmic	lncRNA_intergenic	5.188
273	CATG00000076290.1	CATG00000076290.1	ASO_C0008822_02	27.977	0	9.756	exonic	Cytoplasmic	lncRNA_intergenic	4.302
274	CATG00000076290.1	CATG00000076290.1	ASO_C0008822_03	36.297	0	9.678	exonic	Cytoplasmic	lncRNA_intergenic	4.302
275	CATG00000076290.1	CATG00000076290.1	ASO_C0008822_04	13.356	0	9.194	exonic	Cytoplasmic	lncRNA_intergenic	4.302
276	CATG00000076290.1	CATG00000076290.1	ASO_C0008822_07	34.821	0	51.259	exonic	Cytoplasmic	lncRNA_intergenic	4.302
277	CATG00000076290.1	CATG00000076290.1	ASO_C0008822_10	10.681	0	18.839	exonic	Cytoplasmic	lncRNA_intergenic	4.302
278	CATG00000079799.1	CATG00000079799.1	ASO_C0008586_03	-5.924	0	55.444	exonic	Chromatin bound	lncRNA_intergenic	1.869
279	CATG00000079799.1	CATG00000079799.1	ASO_C0008586_04	2.02	0	24.453	exonic	Chromatin bound	lncRNA_intergenic	1.869
280	CATG00000079799.1	CATG00000079799.1	ASO_C0008586_05	-7.472	0	51.493	exonic	Chromatin bound	lncRNA_intergenic	1.869
281	CATG00000079799.1	CATG00000079799.1	ASO_C0008586_07	24.602	0	44.769	exonic	Chromatin bound	lncRNA_intergenic	1.869
282	CATG00000079799.1	CATG00000079799.1	ASO_C0008586_10	19.588	0	26.868	exonic	Chromatin bound	lncRNA_intergenic	1.869
283	CATG00000079799.1	CATG00000079799.1	ASO_C0008586_AD_01	38.564	0	4.783	intronic	Chromatin bound	lncRNA_intergenic	1.869
284	CATG00000079799.1	CATG00000079799.1	ASO_C0008586_AD_02	43.365	0	33.699	intronic	Chromatin bound	lncRNA_intergenic	1.869
285	CATG00000079799.1	CATG00000079799.1	ASO_C0008586_AD_03	53.449	1	40.387	exonic	Chromatin bound	lncRNA_intergenic	1.869
286	CATG00000079799.1	CATG00000079799.1	ASO_C0008586_AD_06	38.401	0	3.657	intronic	Chromatin bound	lncRNA_intergenic	1.869
287	CATG00000079799.1	CATG00000079799.1	ASO_C0008586_AD_09	32.414	0	29.782	exonic	Chromatin bound	lncRNA_intergenic	1.869
288	CATG00000083589.1	CATG00000083589.1	ASO_C0010207_02	40.45	0	12.317	exonic	Cytoplasmic	lncRNA_intergenic	10.846
289	CATG00000083589.1	CATG00000083589.1	ASO_C0010207_03	28.691	0	37.905	exonic	Cytoplasmic	lncRNA_intergenic	10.846
290	CATG00000083589.1	CATG00000083589.1	ASO_C0010207_04	-20.246	0	32.478	exonic	Cytoplasmic	lncRNA_intergenic	10.846
291	CATG00000083589.1	CATG00000083589.1	ASO_C0010207_06	16.379	0	30.063	exonic	Cytoplasmic	lncRNA_intergenic	10.846
292	CATG00000083589.1	CATG00000083589.1	ASO_C0010207_07	65.523	1	18.026	exonic	Cytoplasmic	lncRNA_intergenic	10.846
293	CATG00000089639.1	CATG00000089639.1	ASO_G0223811_01	96.655	1	23.058	exonic	Chromatin bound	lncRNA_intergenic	2.214
294	CATG00000089639.1	CATG00000089639.1	ASO_G0223811_03	35.473	0	32.823	exonic	Chromatin bound	lncRNA_intergenic	2.214
295	CATG00000089639.1	CATG00000089639.1	ASO_G0223811_04	56.725	0	64.199	exonic	Chromatin bound	lncRNA_intergenic	2.214
296	CATG00000089639.1	CATG00000089639.1	ASO_G0223811_05	36.958	0	48.431	exonic	Chromatin bound	lncRNA_intergenic	2.214
297	CATG00000089639.1	CATG00000089639.1	ASO_G0223811_06	83.681	1	72.958	exonic	Chromatin bound	lncRNA_intergenic	2.214
298	CATG00000089639.1	CATG00000089639.1	ASO_G0223811_AD_02	0	0	8.403	exonic	Chromatin bound	lncRNA_intergenic	2.214
299	CATG00000089639.1	CATG00000089639.1	ASO_G0223811_AD_05	0	0	10.509	exonic	Chromatin bound	lncRNA_intergenic	2.214
300	CATG00000089639.1	CATG00000089639.1	ASO_G0223811_AD_06	0	0	4.055	intronic	Chromatin bound	lncRNA_intergenic	2.214
301	CATG00000089639.1	CATG00000089639.1	ASO_G0223811_AD_07	0	0	0.658	exonic	Chromatin bound	lncRNA_intergenic	2.214
302	CATG00000089639.1	CATG00000089639.1	ASO_G0223811_AD_10	0	0	19.966	exonic	Chromatin bound	lncRNA_intergenic	2.214
303	CATG00000095991.1	CATG00000095991.1	ASO_C0012015_01	56.317	1	38.655	exonic	Chromatin bound	lncRNA_divergent	4.591
304	CATG00000095991.1	CATG00000095991.1	ASO_C0012015_03	41.548	0	23.369	exonic	Chromatin bound	lncRNA_divergent	4.591
305	CATG00000095991.1	CATG00000095991.1	ASO_C0012015_07	63.642	1	56.206	exonic	Chromatin bound	lncRNA_divergent	4.591
306	CATG00000095991.1	CATG00000095991.1	ASO_C0012015_09	43.739	0	17.999	exonic	Chromatin bound	lncRNA_divergent	4.591
307	CATG00000095991.1	CATG00000095991.1	ASO_C0012015_10	62.554	1	17.085	exonic	Chromatin bound	lncRNA_divergent	4.591
308	CATG00000095991.1	CATG00000095991.1	ASO_C0012015_AD_02	84.098	1	73.059	intronic	Chromatin bound	lncRNA_divergent	4.591
309	CATG00000095991.1	CATG00000095991.1	ASO_C0012015_AD_04	81.677	1	43.797	intronic	Chromatin bound	lncRNA_divergent	4.591
310	CATG00000095991.1	CATG00000095991.1	ASO_C0012015_AD_05	76.852	1	64.398	intronic	Chromatin bound	lncRNA_divergent	4.591
311	CATG00000095991.1	CATG00000095991.1	ASO_C0012015_AD_06	75.514	1	59.088	intronic	Chromatin bound	lncRNA_divergent	4.591
312	CATG00000095991.1	CATG00000095991.1	ASO_C0012015_AD_09	28.085	0	12.042	intronic	Chromatin bound	lncRNA_divergent	4.591
313	CATG00000098665.1	CATG00000098665.1	ASO_C0013450_01	44.244	0	59.45	exonic	Nuclear soluble	lncRNA_antisense	2.573
314	CATG00000098665.1	CATG00000098665.1	ASO_C0013450_02	53.593	1	46.62	exonic	Nuclear soluble	lncRNA_antisense	2.573
315	CATG00000098665.1	CATG00000098665.1	ASO_C0013450_03	71.462	1	30.047	exonic	Nuclear soluble	lncRNA_antisense	2.573
316	CATG00000098665.1	CATG00000098665.1	ASO_C0013450_06	71.703	1	50.507	exonic	Nuclear soluble	lncRNA_antisense	2.573
317	CATG00000098665.1	CATG00000098665.1	ASO_C0013450_07	54.501	0	34.578	exonic	Nuclear soluble	lncRNA_antisense	2.573
318	CATG00000098665.1	CATG00000098665.1	ASO_C0013450_AD_01	53.676	0	4.403	exonic	Nuclear soluble	lncRNA_antisense	2.573
319	CATG00000098665.1	CATG00000098665.1	ASO_C0013450_AD_02	39.558	0	-0.791	exonic	Nuclear soluble	lncRNA_antisense	2.573
320	CATG00000098665.1	CATG00000098665.1	ASO_C0013450_AD_03	67.764	1	7.691	exonic	Nuclear soluble	lncRNA_antisense	2.573
321	CATG00000098665.1	CATG00000098665.1	ASO_C0013450_AD_04	41.825	0	8.72	exonic	Nuclear soluble	lncRNA_antisense	2.573
322	CATG00000098665.1	CATG00000098665.1	ASO_C0013450_AD_09	74.534	1	50.49	exonic	Nuclear soluble	lncRNA_antisense	2.573
323	CATG00000098831.1	CATG00000098831.1	ASO_C0013510_01	58.057	1	38.8	exonic	Nuclear soluble	lncRNA_antisense	6.554
324	CATG00000098831.1	CATG00000098831.1	ASO_C0013510_03	52.503	1	40.238	exonic	Nuclear soluble	lncRNA_antisense	6.554
325	CATG00000098831.1	CATG00000098831.1	ASO_C0013510_06	59.769	1	86.833	exonic	Nuclear soluble	lncRNA_antisense	6.554
326	CATG00000098831.1	CATG00000098831.1	ASO_C0013510_07	34.814	0	30.121	exonic	Nuclear soluble	lncRNA_antisense	6.554
327	CATG00000098831.1	CATG00000098831.1	ASO_C0013510_08	45.951	0	8.384	exonic	Nuclear soluble	lncRNA_antisense	6.554
328	CATG00000098831.1	CATG00000098831.1	ASO_C0013510_AD_02	3.561	0	24.86	exonic	Nuclear soluble	lncRNA_antisense	6.554
329	CATG00000098831.1	CATG00000098831.1	ASO_C0013510_AD_04	-3.324	0	-18.448	exonic	Nuclear soluble	lncRNA_antisense	6.554
330	CATG00000098831.1	CATG00000098831.1	ASO_C0013510_AD_05	61.711	1	38.765	exonic	Nuclear soluble	lncRNA_antisense	6.554
331	CATG00000098831.1	CATG00000098831.1	ASO_C0013510_AD_08	12.096	0	21.526	exonic	Nuclear soluble	lncRNA_antisense	6.554
332	CATG00000098831.1	CATG00000098831.1	ASO_C0013510_AD_10	12.701	0	41.173	exonic	Nuclear soluble	lncRNA_antisense	6.554
333	CATG00000106837.1	CATG00000106837.1	ASO_C0015153_01	24.882	0	13.162	exonic	Chromatin bound	lncRNA_intergenic	4.199
334	CATG00000106837.1	CATG00000106837.1	ASO_C0015153_03	56.067	0	46.39	exonic	Chromatin bound	lncRNA_intergenic	4.199
335	CATG00000106837.1	CATG00000106837.1	ASO_C0015153_04	-15.961	0	20.627	exonic	Chromatin bound	lncRNA_intergenic	4.199
336	CATG00000106837.1	CATG00000106837.1	ASO_C0015153_07	25.837	0	22.785	exonic	Chromatin bound	lncRNA_intergenic	4.199
337	CATG00000106837.1	CATG00000106837.1	ASO_C0015153_08	6.812	0	19.642	exonic	Chromatin bound	lncRNA_intergenic	4.199
338	CATG00000108369.1	CATG00000108369.1	ASO_C014559_01	32.15	0	38.826	exonic	Chromatin bound	lncRNA_divergent	5.424
339	CATG00000108369.1	CATG00000108369.1	ASO_C014559_02	19.95	0	42.209	exonic	Chromatin bound	lncRNA_divergent	5.424
340	CATG00000108369.1	CATG00000108369.1	ASO_C014559_06	72.301	1	69.778	exonic	Chromatin bound	lncRNA_divergent	5.424
341	CATG00000108369.1	CATG00000108369.1	ASO_C014559_07	-0.286	0	16.527	exonic	Chromatin bound	lncRNA_divergent	5.424
342	CATG00000108369.1	CATG00000108369.1	ASO_C014559_AD_01	54.965	1	7.793	intronic	Chromatin bound	lncRNA_divergent	5.424
343	CATG00000108369.1	CATG00000108369.1	ASO_C014559_AD_03	32.254	0	-4.099	exonic	Chromatin bound	lncRNA_divergent	5.424
344	CATG00000108369.1	CATG00000108369.1	ASO_C014559_AD_05	45.698	1	25.742	intronic	Chromatin bound	lncRNA_divergent	5.424
345	CATG00000108369.1	CATG00000108369.1	ASO_C014559_AD_06	81.949	1	55.294	intronic	Chromatin bound	lncRNA_divergent	5.424
346	CATG00000108369.1	CATG00000108369.1	ASO_C014559_AD_07	44.032	0	21.272	intronic	Chromatin bound	lncRNA_divergent	5.424
347	CATGC0000023317	CATGC0000023317	ASO_C023317_01	16.396	0	32.32	exonic	other	lncRNA_intergenic	1.071
348	CATGC0000023317	CATGC0000023317	ASO_C023317_02	38.584	0	36.143	exonic	other	lncRNA_intergenic	1.071
349	CATGC0000023317	CATGC0000023317	ASO_C023317_03	26.167	0	29.769	exonic	other	lncRNA_intergenic	1.071
350	CATGC0000023317	CATGC0000023317	ASO_C023317_04	29.424	0	34.56	exonic	other	lncRNA_intergenic	1.071
351	CATGC0000023317	CATGC0000023317	ASO_C023317_07	21.174	0	29.886	exonic	other	lncRNA_intergenic	1.071
352	CATGE0000171943	CATGE0000171943	ASO_G0236933_03	69.653	1	57.216	exonic	other	lncRNA_divergent	0.62
353	CATGE0000171943	CATGE0000171943	ASO_G0236933_05	85.226	1	18.675	exonic	other	lncRNA_divergent	0.62
354	CATGE0000171943	CATGE0000171943	ASO_G0236933_06	86.559	1	45.264	exonic	other	lncRNA_divergent	0.62
355	CATGE0000171943	CATGE0000171943	ASO_G0236933_07	70.55	1	44.031	exonic	other	lncRNA_divergent	0.62
356	CATGE0000171943	CATGE0000171943	ASO_G0236933_08	68.104	1	22.411	exonic	other	lncRNA_divergent	0.62
357	CD27-AS1	CD27-AS1	ASO_G0215039_01	79.332	1	73.745	exonic	Nuclear soluble	lncRNA_divergent	19.6
358	CD27-AS1	CD27-AS1	ASO_G0215039_03	-1.843	0	7.121	exonic	Nuclear soluble	lncRNA_divergent	19.6
359	CD27-AS1	CD27-AS1	ASO_G0215039_05	30.561	0	11.712	exonic	Nuclear soluble	lncRNA_divergent	19.6
360	CD27-AS1	CD27-AS1	ASO_G0215039_06	13.736	0	31.533	exonic	Nuclear soluble	lncRNA_divergent	19.6
361	CD27-AS1	CD27-AS1	ASO_G0215039_08	40.563	0	41.174	exonic	Nuclear soluble	lncRNA_divergent	19.6
362	CD27-AS1	CD27-AS1	ASO_G0215039_AD_01	12.72	0	6.638	intronic	Nuclear soluble	lncRNA_divergent	19.6
363	CD27-AS1	CD27-AS1	ASO_G0215039_AD_05	55.194	0	38.137	exonic	Nuclear soluble	lncRNA_divergent	19.6
364	CD27-AS1	CD27-AS1	ASO_G0215039_AD_07	-21.136	0	12.115	exonic	Nuclear soluble	lncRNA_divergent	19.6
365	CD27-AS1	CD27-AS1	ASO_G0215039_AD_08	76.789	1	26.99	exonic	Nuclear soluble	lncRNA_divergent	19.6
366	CD27-AS1	CD27-AS1	ASO_G0215039_AD_09	50.434	1	31.824	exonic	Nuclear soluble	lncRNA_divergent	19.6
367	CD99P1	CD99P1	ASO_G0223773_01	56.401	1	17.178	exonic	Chromatin bound	pseudogene	2.321
368	CD99P1	CD99P1	ASO_G0223773_05	84.668	1	56.461	intronic	Chromatin bound	pseudogene	2.321
369	CD99P1	CD99P1	ASO_G0223773_06	87.848	1	60.968	exonic	Chromatin bound	pseudogene	2.321
370	CD99P1	CD99P1	ASO_G0223773_07	96.361	1	76.612	exonic	Chromatin bound	pseudogene	2.321
371	CD99P1	CD99P1	ASO_G0223773_10	55.724	1	36.336	intronic	Chromatin bound	pseudogene	2.321
372	CKMT2-AS1	CKMT2-AS1	ASO_G0247572_01	27.086	0	15.499	exonic	Chromatin bound	lncRNA_divergent	13.098
373	CKMT2-AS1	CKMT2-AS1	ASO_G0247572_03	50.306	1	26.237	exonic	Chromatin bound	lncRNA_divergent	13.098
374	CKMT2-AS1	CKMT2-AS1	ASO_G0247572_07	0	0	20.634	exonic	Chromatin bound	lncRNA_divergent	13.098
375	CKMT2-AS1	CKMT2-AS1	ASO_G0247572_08	86.021	1	72.641	exonic	Chromatin bound	lncRNA_divergent	13.098
376	CKMT2-AS1	CKMT2-AS1	ASO_G0247572_09	73.805	1	70.27	exonic	Chromatin bound	lncRNA_divergent	13.098
377	COX10-AS1	COX10-AS1	ASO_G0236088_02	59.305	1	19.63	exonic	Chromatin bound	lncRNA_divergent	13.291
378	COX10-AS1	COX10-AS1	ASO_G0236088_03	31.048	0	2.014	exonic	Chromatin bound	lncRNA_divergent	13.291
379	COX10-AS1	COX10-AS1	ASO_G0236088_07	46.079	0	31.814	exonic	Chromatin bound	lncRNA_divergent	13.291
380	COX10-AS1	COX10-AS1	ASO_G0236088_08	58.19	0	36.218	exonic	Chromatin bound	lncRNA_divergent	13.291
381	COX10-AS1	COX10-AS1	ASO_G0236088_10	11.329	0	22.548	exonic	Chromatin bound	lncRNA_divergent	13.291
382	MIATNB	CTA-211A9.5	ASO_G0244625_02	49.655	1	22.154	exonic	Chromatin bound	lncRNA_intergenic	6.15
383	MIATNB	CTA-211A9.5	ASO_G0244625_04	69.615	1	63.49	exonic	Chromatin bound	lncRNA_intergenic	6.15
384	MIATNB	CTA-211A9.5	ASO_G0244625_06	63.624	1	21.744	exonic	Chromatin bound	lncRNA_intergenic	6.15
385	MIATNB	CTA-211A9.5	ASO_G0244625_08	34.183	0	4.717	exonic	Chromatin bound	lncRNA_intergenic	6.15
386	MIATNB	CTA-211A9.5	ASO_G0244625_09	73.367	1	62.343	exonic	Chromatin bound	lncRNA_intergenic	6.15
387	MIATNB	CTA-211A9.5	ASO_G0244625_AD_05	0	0	10.987	intronic	Chromatin bound	lncRNA_intergenic	6.15
388	MIATNB	CTA-211A9.5	ASO_G0244625_AD_07	0	0	24.199	intronic	Chromatin bound	lncRNA_intergenic	6.15
389	MIATNB	CTA-211A9.5	ASO_G0244625_AD_08	0	1	57.097	intronic	Chromatin bound	lncRNA_intergenic	6.15
390	MIATNB	CTA-211A9.5	ASO_G0244625_AD_09	0	1	60.122	intronic	Chromatin bound	lncRNA_intergenic	6.15
391	MIATNB	CTA-211A9.5	ASO_G0244625_AD_10	0	0	18.237	intronic	Chromatin bound	lncRNA_intergenic	6.15
392	NUP50-DT	CTA-217C2.1	ASO_G0226328_02	47.419	1	0	exonic	Chromatin bound	lncRNA_divergent	11.109
393	NUP50-DT	CTA-217C2.1	ASO_G0226328_03	23.458	0	11.728	exonic	Chromatin bound	lncRNA_divergent	11.109
394	NUP50-DT	CTA-217C2.1	ASO_G0226328_04	72.923	1	21.156	exonic	Chromatin bound	lncRNA_divergent	11.109
395	NUP50-DT	CTA-217C2.1	ASO_G0226328_07	7.268	0	22.085	exonic	Chromatin bound	lncRNA_divergent	11.109
396	NUP50-DT	CTA-217C2.1	ASO_G0226328_10	73.625	1	45.856	exonic	Chromatin bound	lncRNA_divergent	11.109
397	CTB-31O20.2	CTB-31O20.2	ASO_G0261526_01	35.301	0	2.871	exonic	Nuclear soluble	lncRNA_intergenic	4.12
398	CTB-31O20.2	CTB-31O20.2	ASO_G0261526_02	-61.592	0	15.867	exonic	Nuclear soluble	lncRNA_intergenic	4.12
399	CTB-31O20.2	CTB-31O20.2	ASO_G0261526_03	19.24	0	24.365	exonic	Nuclear soluble	lncRNA_intergenic	4.12
400	CTB-31O20.2	CTB-31O20.2	ASO_G0261526_06	16.973	0	19.336	exonic	Nuclear soluble	lncRNA_intergenic	4.12
401	CTB-31O20.2	CTB-31O20.2	ASO_G0261526_08	35.871	0	5.145	exonic	Nuclear soluble	lncRNA_intergenic	4.12
402	CTB-55O6.12	CTB-55O6.12	ASO_G0267169_03	0	0	0.336	exonic	Chromatin bound	lncRNA_divergent	7.558
403	CTB-55O6.12	CTB-55O6.12	ASO_G0267169_04	0	0	21.109	exonic	Chromatin bound	lncRNA_divergent	7.558
404	CTB-55O6.12	CTB-55O6.12	ASO_G0267169_05	0	0	10.376	exonic	Chromatin bound	lncRNA_divergent	7.558
405	CTB-55O6.12	CTB-55O6.12	ASO_G0267169_07	0	0	34.812	exonic	Chromatin bound	lncRNA_divergent	7.558
406	CTB-55O6.12	CTB-55O6.12	ASO_G0267169_10	0	0	20.34	exonic	Chromatin bound	lncRNA_divergent	7.558
407	LINC01184	CTC-228N24.3	ASO_G0245937_01	93.111	1	69.536	exonic	Chromatin bound	lncRNA_divergent	21.912
408	LINC01184	CTC-228N24.3	ASO_G0245937_02	50.242	1	24.621	exonic	Chromatin bound	lncRNA_divergent	21.912
409	LINC01184	CTC-228N24.3	ASO_G0245937_04	84.059	1	43.242	exonic	Chromatin bound	lncRNA_divergent	21.912
410	LINC01184	CTC-228N24.3	ASO_G0245937_05	53.401	0	25.333	exonic	Chromatin bound	lncRNA_divergent	21.912
411	LINC01184	CTC-228N24.3	ASO_G0245937_07	44.48	0	21.353	exonic	Chromatin bound	lncRNA_divergent	21.912
412	LINC01184	CTC-228N24.3	ASO_G0245937_AD_02	97.001	1	80.754	intronic	Chromatin bound	lncRNA_divergent	21.912
413	LINC01184	CTC-228N24.3	ASO_G0245937_AD_03	54.624	0	28.035	exonic	Chromatin bound	lncRNA_divergent	21.912
414	LINC01184	CTC-228N24.3	ASO_G0245937_AD_05	92	1	61.82	intronic	Chromatin bound	lncRNA_divergent	21.912
415	LINC01184	CTC-228N24.3	ASO_G0245937_AD_07	35.608	0	16.293	exonic	Chromatin bound	lncRNA_divergent	21.912
416	LINC01184	CTC-228N24.3	ASO_G0245937_AD_09	93.875	1	54.999	exonic	Chromatin bound	lncRNA_divergent	21.912
417	TMEM220-AS1	CTC-297N7.5	ASO_G0263400_03	75.533	1	21.334	exonic	Chromatin bound	lncRNA_divergent	1.22
418	TMEM220-AS1	CTC-297N7.5	ASO_G0263400_04	65.901	1	20.442	exonic	Chromatin bound	lncRNA_divergent	1.22
419	TMEM220-AS1	CTC-297N7.5	ASO_G0263400_06	78.146	1	15.522	exonic	Chromatin bound	lncRNA_divergent	1.22
420	TMEM220-AS1	CTC-297N7.5	ASO_G0263400_09	75.205	1	19.019	exonic	Chromatin bound	lncRNA_divergent	1.22
421	TMEM220-AS1	CTC-297N7.5	ASO_G0263400_10	73.875	1	27.787	exonic	Chromatin bound	lncRNA_divergent	1.22
422	CTC-338M12.4	CTC-338M12.4	ASO_G0233937_01	35.203	0	31.829	exonic	Nuclear soluble	lncRNA_divergent	8.535
423	CTC-338M12.4	CTC-338M12.4	ASO_G0233937_02	74.998	1	-8.301	exonic	Nuclear soluble	lncRNA_divergent	8.535
424	CTC-338M12.4	CTC-338M12.4	ASO_G0233937_04	20.607	0	6.657	exonic	Nuclear soluble	lncRNA_divergent	8.535
425	CTC-338M12.4	CTC-338M12.4	ASO_G0233937_05	57.274	1	59.378	exonic	Nuclear soluble	lncRNA_divergent	8.535
426	CTC-338M12.4	CTC-338M12.4	ASO_G0233937_10	33.313	0	1.702	exonic	Nuclear soluble	lncRNA_divergent	8.535
427	CTC-338M12.4	CTC-338M12.4	ASO_G0233937_AD_03	52.968	1	18.921	exonic	Nuclear soluble	lncRNA_divergent	8.535
428	CTC-338M12.4	CTC-338M12.4	ASO_G0233937_AD_05	52.365	0	6.545	exonic	Nuclear soluble	lncRNA_divergent	8.535
429	CTC-338M12.4	CTC-338M12.4	ASO_G0233937_AD_08	50.244	1	27.831	exonic	Nuclear soluble	lncRNA_divergent	8.535
430	CTC-338M12.4	CTC-338M12.4	ASO_G0233937_AD_09	26.282	0	5.081	exonic	Nuclear soluble	lncRNA_divergent	8.535
431	CTC-338M12.4	CTC-338M12.4	ASO_G0233937_AD_10	86.597	1	36.835	exonic	Nuclear soluble	lncRNA_divergent	8.535
432	CTC-338M12.5	CTC-338M12.5	ASO_G0250222_01	69.448	1	45.654	exonic	Nuclear soluble	lncRNA_intergenic	4.024
433	CTC-338M12.5	CTC-338M12.5	ASO_G0250222_02	39.15	0	30.452	exonic	Nuclear soluble	lncRNA_intergenic	4.024
434	CTC-338M12.5	CTC-338M12.5	ASO_G0250222_03	25.703	0	31.209	exonic	Nuclear soluble	lncRNA_intergenic	4.024
435	CTC-338M12.5	CTC-338M12.5	ASO_G0250222_06	27.641	0	36.951	exonic	Nuclear soluble	lncRNA_intergenic	4.024
436	CTC-338M12.5	CTC-338M12.5	ASO_G0250222_07	25.899	0	42.573	exonic	Nuclear soluble	lncRNA_intergenic	4.024
437	CTC-338M12.5	CTC-338M12.5	ASO_G0250222_AD_02	14.078	0	40.685	exonic	Nuclear soluble	lncRNA_intergenic	4.024
438	CTC-338M12.5	CTC-338M12.5	ASO_G0250222_AD_05	10.735	0	10.378	exonic	Nuclear soluble	lncRNA_intergenic	4.024
439	CTC-338M12.5	CTC-338M12.5	ASO_G0250222_AD_06	-8.67	0	-4813.99	exonic	Nuclear soluble	lncRNA_intergenic	4.024
440	CTC-338M12.5	CTC-338M12.5	ASO_G0250222_AD_07	17.603	0	55.087	exonic	Nuclear soluble	lncRNA_intergenic	4.024
441	CTC-338M12.5	CTC-338M12.5	ASO_G0250222_AD_10	32.138	0	48.988	exonic	Nuclear soluble	lncRNA_intergenic	4.024
442	CTC-459F4.3	CTC-459F4.3	ASO_G0267575_01	34.227	0	9.067	exonic	Nuclear soluble	lncRNA_sense_intronic	11.484
443	CTC-459F4.3	CTC-459F4.3	ASO_G0267575_02	27.142	0	-20.152	exonic	Nuclear soluble	lncRNA_sense_intronic	11.484
444	CTC-459F4.3	CTC-459F4.3	ASO_G0267575_03	39.732	0	5.867	exonic	Nuclear soluble	lncRNA_sense_intronic	11.484
445	CTC-459F4.3	CTC-459F4.3	ASO_G0267575_04	39.151	0	11.672	exonic	Nuclear soluble	lncRNA_sense_intronic	11.484
446	ZNF56	CTC-559E9.6	ASO_G0267419_02	78.371	1	88.811	exonic	Chromatin bound	lncRNA_divergent	3.764
447	ZNF56	CTC-559E9.6	ASO_G0267419_03	4.886	0	17.078	exonic	Chromatin bound	lncRNA_divergent	3.764
448	ZNF56	CTC-559E9.6	ASO_G0267419_04	15.356	0	36.035	exonic	Chromatin bound	lncRNA_divergent	3.764
449	ZNF56	CTC-559E9.6	ASO_G0267419_05	40.494	0	37.25	exonic	Chromatin bound	lncRNA_divergent	3.764
450	ZNF56	CTC-559E9.6	ASO_G0267419_08	79.271	1	52.9	exonic	Chromatin bound	lncRNA_divergent	3.764
451	ZNF56	CTC-559E9.6	ASO_G0267419_AD_03	64.042	1	40.373	intronic	Chromatin bound	lncRNA_divergent	3.764
452	ZNF56	CTC-559E9.6	ASO_G0267419_AD_04	94.374	1	87.169	intronic	Chromatin bound	lncRNA_divergent	3.764
453	ZNF56	CTC-559E9.6	ASO_G0267419_AD_05	39.374	0	4.932	intronic	Chromatin bound	lncRNA_divergent	3.764
454	ZNF56	CTC-559E9.6	ASO_G0267419_AD_06	97.165	1	78.378	exonic	Chromatin bound	lncRNA_divergent	3.764
455	ZNF56	CTC-559E9.6	ASO_G0267419_AD_08	79.097	1	29.151	exonic	Chromatin bound	lncRNA_divergent	3.764
456	ZNF433-AS1	CTD-2006C1.2	ASO_G0219665_01	66.041	1	42.841	exonic	Chromatin bound	lncRNA_intergenic	6.167
457	ZNF433-AS1	CTD-2006C1.2	ASO_G0219665_02	7.002	0	10.937	exonic	Chromatin bound	lncRNA_intergenic	6.167
458	ZNF433-AS1	CTD-2006C1.2	ASO_G0219665_06	37.814	0	33.659	exonic	Chromatin bound	lncRNA_intergenic	6.167
459	ZNF433-AS1	CTD-2006C1.2	ASO_G0219665_07	71.974	1	50.536	exonic	Chromatin bound	lncRNA_intergenic	6.167
460	ZNF433-AS1	CTD-2006C1.2	ASO_G0219665_08	50.789	0	75.383	exonic	Chromatin bound	lncRNA_intergenic	6.167
461	ZNF433-AS1	CTD-2006C1.2	ASO_G0219665_AD_02	42.451	0	27.874	exonic	Chromatin bound	lncRNA_intergenic	6.167
462	ZNF433-AS1	CTD-2006C1.2	ASO_G0219665_AD_03	6.578	0	9.488	exonic	Chromatin bound	lncRNA_intergenic	6.167
463	ZNF433-AS1	CTD-2006C1.2	ASO_G0219665_AD_04	92.534	1	71.806	exonic	Chromatin bound	lncRNA_intergenic	6.167
464	ZNF433-AS1	CTD-2006C1.2	ASO_G0219665_AD_05	22.382	0	29.84	intronic	Chromatin bound	lncRNA_intergenic	6.167
465	ZNF433-AS1	CTD-2006C1.2	ASO_G0219665_AD_08	90.259	1	75.52	exonic	Chromatin bound	lncRNA_intergenic	6.167
466	CTD-2015H6.3	CTD-2015H6.3	ASO_G0249042_01	52.289	1	20.197	exonic	Cytoplasmic	lncRNA_divergent	10.929
467	CTD-2015H6.3	CTD-2015H6.3	ASO_G0249042_02	37.954	0	5.409	exonic	Cytoplasmic	lncRNA_divergent	10.929
468	CTD-2015H6.3	CTD-2015H6.3	ASO_G0249042_03	91.984	1	42.217	exonic	Cytoplasmic	lncRNA_divergent	10.929
469	CTD-2015H6.3	CTD-2015H6.3	ASO_G0249042_08	58.333	1	41.771	exonic	Cytoplasmic	lncRNA_divergent	10.929
470	CTD-2015H6.3	CTD-2015H6.3	ASO_G0249042_09	3.31	0	-5.245	exonic	Cytoplasmic	lncRNA_divergent	10.929
471	SCAMP1-AS1	CTD-2037K23.2	ASO_G0245556_01	21.213	0	37.802	exonic	Nuclear soluble	lncRNA_divergent	3.342
472	SCAMP1-AS1	CTD-2037K23.2	ASO_G0245556_03	33.694	0	32.8	exonic	Nuclear soluble	lncRNA_divergent	3.342
473	SCAMP1-AS1	CTD-2037K23.2	ASO_G0245556_04	11.093	0	39.591	exonic	Nuclear soluble	lncRNA_divergent	3.342
474	SCAMP1-AS1	CTD-2037K23.2	ASO_G0245556_05	10.519	0	25.179	exonic	Nuclear soluble	lncRNA_divergent	3.342
475	SCAMP1-AS1	CTD-2037K23.2	ASO_G0245556_07	70.523	1	40.673	exonic	Nuclear soluble	lncRNA_divergent	3.342
476	LINC02104	CTD-2078B5.2	ASO_G0271334_02	35.256	0	31.932	exonic	Cytoplasmic	lncRNA_intergenic	3.218
477	LINC02104	CTD-2078B5.2	ASO_G0271334_05	45.277	0	-19.401	exonic	Cytoplasmic	lncRNA_intergenic	3.218
478	LINC02104	CTD-2078B5.2	ASO_G0271334_07	18.834	0	24.606	exonic	Cytoplasmic	lncRNA_intergenic	3.218
479	LINC02104	CTD-2078B5.2	ASO_G0271334_08	29.447	0	-25.035	exonic	Cytoplasmic	lncRNA_intergenic	3.218
480	LINC02104	CTD-2078B5.2	ASO_G0271334_10	28.16	0	9.078	exonic	Cytoplasmic	lncRNA_intergenic	3.218
481	ZNF790-AS1	CTD-2162K18.5	ASO_G0267254_02	38.325	0	30.199	exonic	Chromatin bound	lncRNA_sense_intronic	4.198
482	ZNF790-AS1	CTD-2162K18.5	ASO_G0267254_04	77.779	1	47.372	exonic	Chromatin bound	lncRNA_sense_intronic	4.198
483	ZNF790-AS1	CTD-2162K18.5	ASO_G0267254_05	19.098	0	36.318	exonic	Chromatin bound	lncRNA_sense_intronic	4.198
484	ZNF790-AS1	CTD-2162K18.5	ASO_G0267254_06	45.139	1	34.843	exonic	Chromatin bound	lncRNA_sense_intronic	4.198
485	ZNF790-AS1	CTD-2162K18.5	ASO_G0267254_07	52.16	1	59.478	exonic	Chromatin bound	lncRNA_sense_intronic	4.198
486	ZNF790-AS1	CTD-2162K18.5	ASO_G0267254_AD_01	40.223	0	11.251	intronic	Chromatin bound	lncRNA_sense_intronic	4.198
487	ZNF790-AS1	CTD-2162K18.5	ASO_G0267254_AD_02	58.55	0	9.552	intronic	Chromatin bound	lncRNA_sense_intronic	4.198
488	ZNF790-AS1	CTD-2162K18.5	ASO_G0267254_AD_03	45.971	0	25.111	intronic	Chromatin bound	lncRNA_sense_intronic	4.198
489	ZNF790-AS1	CTD-2162K18.5	ASO_G0267254_AD_07	21.43	0	27.937	intronic	Chromatin bound	lncRNA_sense_intronic	4.198
490	ZNF790-AS1	CTD-2162K18.5	ASO_G0267254_AD_09	-1.185	0	23.979	intronic	Chromatin bound	lncRNA_sense_intronic	4.198
491	WFDC21P	CTD-2319I12.1	ASO_G0261040_01	21.633	0	-26.752	exonic	Cytoplasmic	lncRNA_intergenic	16.21
492	WFDC21P	CTD-2319I12.1	ASO_G0261040_05	24.346	0	38.126	exonic	Cytoplasmic	lncRNA_intergenic	16.21
493	WFDC21P	CTD-2319I12.1	ASO_G0261040_06	31.134	0	29.233	exonic	Cytoplasmic	lncRNA_intergenic	16.21
494	WFDC21P	CTD-2319I12.1	ASO_G0261040_08	28.202	0	7.065	exonic	Cytoplasmic	lncRNA_intergenic	16.21
495	WFDC21P	CTD-2319I12.1	ASO_G0261040_10	62.117	1	38.725	exonic	Cytoplasmic	lncRNA_intergenic	16.21
496	CTD-2319I12.4	CTD-2319I12.4	ASO_G0267248_01	76.838	1	-5.49411e+07	exonic	Chromatin bound	lncRNA_intergenic	5.976
497	CTD-2319I12.4	CTD-2319I12.4	ASO_G0267248_02	95.607	1	86.433	exonic	Chromatin bound	lncRNA_intergenic	5.976
498	CTD-2319I12.4	CTD-2319I12.4	ASO_G0267248_05	40.369	0	28.928	exonic	Chromatin bound	lncRNA_intergenic	5.976
499	CTD-2319I12.4	CTD-2319I12.4	ASO_G0267248_08	76.073	1	41.727	exonic	Chromatin bound	lncRNA_intergenic	5.976
500	CTD-2319I12.4	CTD-2319I12.4	ASO_G0267248_AD_02	34.736	0	36.297	exonic	Chromatin bound	lncRNA_intergenic	5.976
501	CTD-2319I12.4	CTD-2319I12.4	ASO_G0267248_AD_03	84.391	1	72.414	exonic	Chromatin bound	lncRNA_intergenic	5.976
502	CTD-2319I12.4	CTD-2319I12.4	ASO_G0267248_AD_05	68.589	1	52.992	exonic	Chromatin bound	lncRNA_intergenic	5.976
503	CTD-2319I12.4	CTD-2319I12.4	ASO_G0267248_AD_07	68.694	1	68.49	exonic	Chromatin bound	lncRNA_intergenic	5.976
504	CTD-2319I12.4	CTD-2319I12.4	ASO_G0267248_AD_08	65.196	1	50.229	exonic	Chromatin bound	lncRNA_intergenic	5.976
505	CTD-2336O2.1	CTD-2336O2.1	ASO_G0253982_01	44.453	0	16.383	exonic	Cytoplasmic	lncRNA_divergent	23.074
506	CTD-2336O2.1	CTD-2336O2.1	ASO_G0253982_02	32.345	0	-4.876	exonic	Cytoplasmic	lncRNA_divergent	23.074
507	CTD-2336O2.1	CTD-2336O2.1	ASO_G0253982_05	26.919	0	11.19	exonic	Cytoplasmic	lncRNA_divergent	23.074
508	CTD-2336O2.1	CTD-2336O2.1	ASO_G0253982_06	39.866	0	5.816	exonic	Cytoplasmic	lncRNA_divergent	23.074
509	CTD-2336O2.1	CTD-2336O2.1	ASO_G0253982_08	88.196	1	64.724	exonic	Cytoplasmic	lncRNA_divergent	23.074
510	CTD-2336O2.1	CTD-2336O2.1	ASO_G0253982_AD_01	56.235	1	72.869	exonic	Cytoplasmic	lncRNA_divergent	23.074
511	CTD-2336O2.1	CTD-2336O2.1	ASO_G0253982_AD_04	77.209	1	11.422	exonic	Cytoplasmic	lncRNA_divergent	23.074
512	CTD-2336O2.1	CTD-2336O2.1	ASO_G0253982_AD_06	14.782	0	15.615	exonic	Cytoplasmic	lncRNA_divergent	23.074
513	CTD-2336O2.1	CTD-2336O2.1	ASO_G0253982_AD_08	22.933	0	-2953.1	intronic	Cytoplasmic	lncRNA_divergent	23.074
514	CTD-2336O2.1	CTD-2336O2.1	ASO_G0253982_AD_10	40.629	0	41.621	exonic	Cytoplasmic	lncRNA_divergent	23.074
515	CTD-2366F13.1	CTD-2366F13.1	ASO_G0247796_02	71.874	1	33.424	exonic	Cytoplasmic	lncRNA_divergent	2.997
516	CTD-2366F13.1	CTD-2366F13.1	ASO_G0247796_04	52.468	0	15.372	exonic	Cytoplasmic	lncRNA_divergent	2.997
517	CTD-2366F13.1	CTD-2366F13.1	ASO_G0247796_05	79.649	1	26.319	exonic	Cytoplasmic	lncRNA_divergent	2.997
518	CTD-2366F13.1	CTD-2366F13.1	ASO_G0247796_07	60.269	1	26.983	exonic	Cytoplasmic	lncRNA_divergent	2.997
519	CTD-2366F13.1	CTD-2366F13.1	ASO_G0247796_10	19.331	0	27.6	exonic	Cytoplasmic	lncRNA_divergent	2.997
520	CTD-2532K18.2	CTD-2532K18.2	ASO_G0251144_04	57.492	1	35.202	exonic	Cytoplasmic	lncRNA_sense_intronic	0.395
521	CTD-2532K18.2	CTD-2532K18.2	ASO_G0251144_05	40.962	0	48.575	exonic	Cytoplasmic	lncRNA_sense_intronic	0.395
522	CTD-2532K18.2	CTD-2532K18.2	ASO_G0251144_06	87.563	1	24.509	exonic	Cytoplasmic	lncRNA_sense_intronic	0.395
523	CTD-2532K18.2	CTD-2532K18.2	ASO_G0251144_07	83.4	1	35.402	exonic	Cytoplasmic	lncRNA_sense_intronic	0.395
524	CTD-2587H24.5	CTD-2587H24.5	ASO_G0267577_01	95.631	1	77.185	exonic	Cytoplasmic	lncRNA_divergent	3.652
525	CTD-2587H24.5	CTD-2587H24.5	ASO_G0267577_03	66.789	1	96.072	exonic	Cytoplasmic	lncRNA_divergent	3.652
526	CTD-2587H24.5	CTD-2587H24.5	ASO_G0267577_07	54.008	0	45.414	exonic	Cytoplasmic	lncRNA_divergent	3.652
527	CTD-2587H24.5	CTD-2587H24.5	ASO_G0267577_08	33.063	0	13.082	exonic	Cytoplasmic	lncRNA_divergent	3.652
528	CTD-2587H24.5	CTD-2587H24.5	ASO_G0267577_10	54.29	0	8.98	exonic	Cytoplasmic	lncRNA_divergent	3.652
529	CTD-2651B20.3	CTD-2651B20.3	ASO_G0259520_01	81.113	1	21.21	exonic	Chromatin bound	lncRNA_divergent	0.482
530	CTD-2651B20.3	CTD-2651B20.3	ASO_G0259520_02	19.329	0	-17.72	exonic	Chromatin bound	lncRNA_divergent	0.482
531	CTD-2651B20.3	CTD-2651B20.3	ASO_G0259520_04	65.716	1	38.789	exonic	Chromatin bound	lncRNA_divergent	0.482
532	CTD-2651B20.3	CTD-2651B20.3	ASO_G0259520_06	69.764	1	22.274	exonic	Chromatin bound	lncRNA_divergent	0.482
533	CTD-2651B20.3	CTD-2651B20.3	ASO_G0259520_07	82.117	1	63.976	exonic	Chromatin bound	lncRNA_divergent	0.482
534	CTD-2651B20.3	CTD-2651B20.3	ASO_G0259520_AD_03	42.567	0	-123.598	intronic	Chromatin bound	lncRNA_divergent	0.482
535	CTD-2651B20.3	CTD-2651B20.3	ASO_G0259520_AD_04	93.293	1	53.27	intronic	Chromatin bound	lncRNA_divergent	0.482
536	CTD-2651B20.3	CTD-2651B20.3	ASO_G0259520_AD_05	88.878	1	48.076	intronic	Chromatin bound	lncRNA_divergent	0.482
537	CTD-2651B20.3	CTD-2651B20.3	ASO_G0259520_AD_08	91.074	1	53.783	intronic	Chromatin bound	lncRNA_divergent	0.482
538	CTD-2651B20.3	CTD-2651B20.3	ASO_G0259520_AD_09	66.259	1	22.494	intronic	Chromatin bound	lncRNA_divergent	0.482
539	ZNF528-AS1	CTD-3018O17.3	ASO_G0269834_01	-25.19	0	41.36	exonic	Chromatin bound	lncRNA_divergent	3.925
540	ZNF528-AS1	CTD-3018O17.3	ASO_G0269834_02	-14.216	0	75.797	exonic	Chromatin bound	lncRNA_divergent	3.925
541	ZNF528-AS1	CTD-3018O17.3	ASO_G0269834_04	-35.838	0	51.457	exonic	Chromatin bound	lncRNA_divergent	3.925
542	ZNF528-AS1	CTD-3018O17.3	ASO_G0269834_05	-15.17	0	40.39	exonic	Chromatin bound	lncRNA_divergent	3.925
543	ZNF528-AS1	CTD-3018O17.3	ASO_G0269834_09	-28.566	0	42.566	exonic	Chromatin bound	lncRNA_divergent	3.925
544	ZNF528-AS1	CTD-3018O17.3	ASO_G0269834_AD_01	74.118	1	30.887	exonic	Chromatin bound	lncRNA_divergent	3.925
545	ZNF528-AS1	CTD-3018O17.3	ASO_G0269834_AD_02	70.485	1	74.903	exonic	Chromatin bound	lncRNA_divergent	3.925
546	ZNF528-AS1	CTD-3018O17.3	ASO_G0269834_AD_05	53.231	0	42.267	exonic	Chromatin bound	lncRNA_divergent	3.925
547	ZNF528-AS1	CTD-3018O17.3	ASO_G0269834_AD_06	75.779	1	57.424	exonic	Chromatin bound	lncRNA_divergent	3.925
548	ZNF528-AS1	CTD-3018O17.3	ASO_G0269834_AD_08	43.706	0	14.026	exonic	Chromatin bound	lncRNA_divergent	3.925
549	CTD-3074O7.5	CTD-3074O7.5	ASO_G0255517_01	84.619	1	62.635	exonic	Nuclear soluble	lncRNA_divergent	7.381
550	CTD-3074O7.5	CTD-3074O7.5	ASO_G0255517_02	9.551	0	39.697	exonic	Nuclear soluble	lncRNA_divergent	7.381
551	CTD-3074O7.5	CTD-3074O7.5	ASO_G0255517_05	44.598	0	47.431	exonic	Nuclear soluble	lncRNA_divergent	7.381
552	CTD-3074O7.5	CTD-3074O7.5	ASO_G0255517_07	56.205	0	52.69	exonic	Nuclear soluble	lncRNA_divergent	7.381
553	CTD-3074O7.5	CTD-3074O7.5	ASO_G0255517_09	32.06	0	39.808	exonic	Nuclear soluble	lncRNA_divergent	7.381
554	CTD-3131K8.2	CTD-3131K8.2	ASO_G0269439_02	42.07	0	18.94	exonic	Chromatin bound	lncRNA_divergent	8.491
555	CTD-3131K8.2	CTD-3131K8.2	ASO_G0269439_05	63.648	1	47.23	exonic	Chromatin bound	lncRNA_divergent	8.491
556	CTD-3131K8.2	CTD-3131K8.2	ASO_G0269439_07	62.248	1	52.133	exonic	Chromatin bound	lncRNA_divergent	8.491
557	CTD-3131K8.2	CTD-3131K8.2	ASO_G0269439_08	33.576	0	16.638	exonic	Chromatin bound	lncRNA_divergent	8.491
558	CTD-3131K8.2	CTD-3131K8.2	ASO_G0269439_09	78.322	1	61.543	exonic	Chromatin bound	lncRNA_divergent	8.491
559	CTD-3131K8.2	CTD-3131K8.2	ASO_G0269439_AD_01	43.101	0	18.786	exonic	Chromatin bound	lncRNA_divergent	8.491
560	CTD-3131K8.2	CTD-3131K8.2	ASO_G0269439_AD_02	46.216	1	28.885	exonic	Chromatin bound	lncRNA_divergent	8.491
561	CTD-3131K8.2	CTD-3131K8.2	ASO_G0269439_AD_03	31.687	0	32.021	exonic	Chromatin bound	lncRNA_divergent	8.491
562	CTD-3131K8.2	CTD-3131K8.2	ASO_G0269439_AD_04	74.358	1	46.138	intronic	Chromatin bound	lncRNA_divergent	8.491
563	CTD-3131K8.2	CTD-3131K8.2	ASO_G0269439_AD_05	73.346	1	44.802	intronic	Chromatin bound	lncRNA_divergent	8.491
564	CTD-3138B18.5	CTD-3138B18.5	ASO_G0268516_02	44.786	0	35.499	exonic	Chromatin bound	lncRNA_divergent	11.574
565	CTD-3138B18.5	CTD-3138B18.5	ASO_G0268516_03	49.859	0	34.222	exonic	Chromatin bound	lncRNA_divergent	11.574
566	CTD-3138B18.5	CTD-3138B18.5	ASO_G0268516_04	32.681	0	20.744	exonic	Chromatin bound	lncRNA_divergent	11.574
567	CTD-3138B18.5	CTD-3138B18.5	ASO_G0268516_07	47.346	0	28.316	exonic	Chromatin bound	lncRNA_divergent	11.574
568	CTD-3138B18.5	CTD-3138B18.5	ASO_G0268516_10	39.786	0	28.836	exonic	Chromatin bound	lncRNA_divergent	11.574
569	MHENCR	CTD-3184A7.4	ASO_G0232442_01	82.02	1	40.663	exonic	Nuclear soluble	lncRNA_divergent	7.524
570	MHENCR	CTD-3184A7.4	ASO_G0232442_02	72.593	1	26.23	exonic	Nuclear soluble	lncRNA_divergent	7.524
571	MHENCR	CTD-3184A7.4	ASO_G0232442_03	52.55	0	52.29	exonic	Nuclear soluble	lncRNA_divergent	7.524
572	MHENCR	CTD-3184A7.4	ASO_G0232442_04	66.988	1	31.704	exonic	Nuclear soluble	lncRNA_divergent	7.524
573	MHENCR	CTD-3184A7.4	ASO_G0232442_07	70.221	1	5.275	exonic	Nuclear soluble	lncRNA_divergent	7.524
574	DANCR	DANCR	ASO_G0226950_01	81.763	1	51.647	exonic	Cytoplasmic	lncRNA_intergenic	16.82
575	DANCR	DANCR	ASO_G0226950_02	94.299	1	76.073	exonic	Cytoplasmic	lncRNA_intergenic	16.82
576	DANCR	DANCR	ASO_G0226950_03	45.668	1	18.765	exonic	Cytoplasmic	lncRNA_intergenic	16.82
577	DANCR	DANCR	ASO_G0226950_04	90.293	1	86.894	exonic	Cytoplasmic	lncRNA_intergenic	16.82
578	DANCR	DANCR	ASO_G0226950_05	96.139	1	78.3	exonic	Cytoplasmic	lncRNA_intergenic	16.82
579	DANCR	DANCR	ASO_G0226950_AD_01	59.732	1	43.798	exonic	Cytoplasmic	lncRNA_intergenic	16.82
580	DANCR	DANCR	ASO_G0226950_AD_03	18.237	0	8.279	exonic	Cytoplasmic	lncRNA_intergenic	16.82
581	DANCR	DANCR	ASO_G0226950_AD_04	43.964	0	0	exonic	Cytoplasmic	lncRNA_intergenic	16.82
582	DANCR	DANCR	ASO_G0226950_AD_07	93.598	1	73.554	exonic	Cytoplasmic	lncRNA_intergenic	16.82
583	DANCR	DANCR	ASO_G0226950_AD_08	40.101	0	0	exonic	Cytoplasmic	lncRNA_intergenic	16.82
584	DGUOK-AS1	DGUOK-AS1	ASO_G0237883_01	58.636	0	29.809	exonic	Chromatin bound	lncRNA_intergenic	2.362
585	DGUOK-AS1	DGUOK-AS1	ASO_G0237883_02	-26.405	0	33.346	exonic	Chromatin bound	lncRNA_intergenic	2.362
586	DGUOK-AS1	DGUOK-AS1	ASO_G0237883_03	13.964	0	44.5	exonic	Chromatin bound	lncRNA_intergenic	2.362
587	DGUOK-AS1	DGUOK-AS1	ASO_G0237883_04	32.549	0	21.52	exonic	Chromatin bound	lncRNA_intergenic	2.362
588	DGUOK-AS1	DGUOK-AS1	ASO_G0237883_07	27.385	0	40.181	exonic	Chromatin bound	lncRNA_intergenic	2.362
589	DLGAP1-AS1	DLGAP1-AS1	ASO_G0177337_01	0	0	-7.722	exonic	Nuclear soluble	lncRNA_antisense	11.899
590	DLGAP1-AS1	DLGAP1-AS1	ASO_G0177337_02	0	0	29.425	exonic	Nuclear soluble	lncRNA_antisense	11.899
591	DLGAP1-AS1	DLGAP1-AS1	ASO_G0177337_03	0	0	1.749	exonic	Nuclear soluble	lncRNA_antisense	11.899
592	DLGAP1-AS1	DLGAP1-AS1	ASO_G0177337_04	0	0	22.719	exonic	Nuclear soluble	lncRNA_antisense	11.899
593	DLGAP1-AS1	DLGAP1-AS1	ASO_G0177337_09	0	0	21.571	exonic	Nuclear soluble	lncRNA_antisense	11.899
594	DNAJC27-AS1	DNAJC27-AS1	ASO_G0224165_01	53.34	1	13.856	exonic	Nuclear soluble	lncRNA_divergent	2.779
595	DNAJC27-AS1	DNAJC27-AS1	ASO_G0224165_04	54.137	0	23.904	exonic	Nuclear soluble	lncRNA_divergent	2.779
596	DNAJC27-AS1	DNAJC27-AS1	ASO_G0224165_06	45.162	1	18.439	exonic	Nuclear soluble	lncRNA_divergent	2.779
597	DNAJC27-AS1	DNAJC27-AS1	ASO_G0224165_09	39.662	0	48.612	exonic	Nuclear soluble	lncRNA_divergent	2.779
598	DNAJC27-AS1	DNAJC27-AS1	ASO_G0224165_10	77.98	1	75.842	exonic	Nuclear soluble	lncRNA_divergent	2.779
599	DNAJC27-AS1	DNAJC27-AS1	ASO_G0224165_AD_01	61.717	1	16.482	exonic	Nuclear soluble	lncRNA_divergent	2.779
600	DNAJC27-AS1	DNAJC27-AS1	ASO_G0224165_AD_03	52.206	1	19.648	exonic	Nuclear soluble	lncRNA_divergent	2.779
601	DNAJC27-AS1	DNAJC27-AS1	ASO_G0224165_AD_07	70.811	1	54.964	exonic	Nuclear soluble	lncRNA_divergent	2.779
602	DNAJC27-AS1	DNAJC27-AS1	ASO_G0224165_AD_08	34.662	0	11.53	exonic	Nuclear soluble	lncRNA_divergent	2.779
603	DNAJC27-AS1	DNAJC27-AS1	ASO_G0224165_AD_10	63.147	1	14.386	exonic	Nuclear soluble	lncRNA_divergent	2.779
604	DNM3OS	DNM3OS	ASO_G0230630_01	33.444	0	41.641	exonic	Nuclear soluble	lncRNA_antisense	7.061
605	DNM3OS	DNM3OS	ASO_G0230630_02	39.664	0	28.356	exonic	Nuclear soluble	lncRNA_antisense	7.061
606	DNM3OS	DNM3OS	ASO_G0230630_03	42.996	0	29.749	exonic	Nuclear soluble	lncRNA_antisense	7.061
607	DNM3OS	DNM3OS	ASO_G0230630_05	57.271	0	6.947	exonic	Nuclear soluble	lncRNA_antisense	7.061
608	DNM3OS	DNM3OS	ASO_G0230630_06	71.68	1	36.811	exonic	Nuclear soluble	lncRNA_antisense	7.061
609	DNM3OS	DNM3OS	ASO_G0230630_AD_01	56.553	0	33.438	exonic	Nuclear soluble	lncRNA_antisense	7.061
610	DNM3OS	DNM3OS	ASO_G0230630_AD_02	90.293	1	62.584	exonic	Nuclear soluble	lncRNA_antisense	7.061
611	DNM3OS	DNM3OS	ASO_G0230630_AD_04	98.049	1	90.391	exonic	Nuclear soluble	lncRNA_antisense	7.061
612	DNM3OS	DNM3OS	ASO_G0230630_AD_09	87.123	1	51.015	exonic	Nuclear soluble	lncRNA_antisense	7.061
613	DNM3OS	DNM3OS	ASO_G0230630_AD_10	55.519	0	70.815	exonic	Nuclear soluble	lncRNA_antisense	7.061
614	NRAV	DYNLL1-AS1	ASO_G0248008_01	47.908	1	6.135	exonic	Cytoplasmic	lncRNA_divergent	8.442
615	NRAV	DYNLL1-AS1	ASO_G0248008_02	67.692	1	21.633	exonic	Cytoplasmic	lncRNA_divergent	8.442
616	NRAV	DYNLL1-AS1	ASO_G0248008_04	21.078	0	25.465	exonic	Cytoplasmic	lncRNA_divergent	8.442
617	NRAV	DYNLL1-AS1	ASO_G0248008_08	35.064	0	22.476	exonic	Cytoplasmic	lncRNA_divergent	8.442
618	NRAV	DYNLL1-AS1	ASO_G0248008_10	31.068	0	14.066	exonic	Cytoplasmic	lncRNA_divergent	8.442
619	EIF3J-DT	EIF3J-AS1	ASO_G0179523_04	8.281	0	10.308	exonic	Nuclear soluble	lncRNA_divergent	7.704
620	EIF3J-DT	EIF3J-AS1	ASO_G0179523_08	-9.703	0	13.293	exonic	Nuclear soluble	lncRNA_divergent	7.704
621	EIF3J-DT	EIF3J-AS1	ASO_G0179523_09	66.083	1	44.347	exonic	Nuclear soluble	lncRNA_divergent	7.704
622	EMX2OS	EMX2OS	ASO_G0229847_01	91.078	1	71.879	exonic	Cytoplasmic	lncRNA_divergent	10.797
623	EMX2OS	EMX2OS	ASO_G0229847_02	69.608	1	34.225	exonic	Cytoplasmic	lncRNA_divergent	10.797
624	EMX2OS	EMX2OS	ASO_G0229847_03	90.143	1	57.723	exonic	Cytoplasmic	lncRNA_divergent	10.797
625	EMX2OS	EMX2OS	ASO_G0229847_04	88.897	1	29.508	exonic	Cytoplasmic	lncRNA_divergent	10.797
626	EMX2OS	EMX2OS	ASO_G0229847_05	98.026	1	92.88	exonic	Cytoplasmic	lncRNA_divergent	10.797
627	EMX2OS	EMX2OS	ASO_G0229847_AD_02	90.622	1	78.523	intronic	Cytoplasmic	lncRNA_divergent	10.797
628	EMX2OS	EMX2OS	ASO_G0229847_AD_03	77.225	1	38.168	exonic	Cytoplasmic	lncRNA_divergent	10.797
629	EMX2OS	EMX2OS	ASO_G0229847_AD_04	95.833	1	95.553	intronic	Cytoplasmic	lncRNA_divergent	10.797
630	EMX2OS	EMX2OS	ASO_G0229847_AD_05	84.413	1	64.942	intronic	Cytoplasmic	lncRNA_divergent	10.797
631	EMX2OS	EMX2OS	ASO_G0229847_AD_06	72.237	1	26.904	exonic	Cytoplasmic	lncRNA_divergent	10.797
632	ERVK13-1	ERVK13-1	ASO_G0260565_01	0	0	-14009	exonic	Chromatin bound	lncRNA_intergenic	12.164
633	ERVK13-1	ERVK13-1	ASO_G0260565_02	0	0	13.407	exonic	Chromatin bound	lncRNA_intergenic	12.164
634	ERVK13-1	ERVK13-1	ASO_G0260565_03	0	0	-30235	exonic	Chromatin bound	lncRNA_intergenic	12.164
635	ERVK13-1	ERVK13-1	ASO_G0260565_04	0	0	35.82	exonic	Chromatin bound	lncRNA_intergenic	12.164
636	ERVK13-1	ERVK13-1	ASO_G0260565_07	0	0	-9778.84	exonic	Chromatin bound	lncRNA_intergenic	12.164
637	ERVK13-1	ERVK13-1	ASO_G0260565_AD_02	89.454	1	66.659	exonic	Chromatin bound	lncRNA_intergenic	12.164
638	ERVK13-1	ERVK13-1	ASO_G0260565_AD_04	64.513	1	42.207	exonic	Chromatin bound	lncRNA_intergenic	12.164
639	ERVK13-1	ERVK13-1	ASO_G0260565_AD_06	98.108	1	96.485	exonic	Chromatin bound	lncRNA_intergenic	12.164
640	ERVK13-1	ERVK13-1	ASO_G0260565_AD_07	74.673	1	64.167	exonic	Chromatin bound	lncRNA_intergenic	12.164
641	ERVK13-1	ERVK13-1	ASO_G0260565_AD_08	93.951	1	91.783	exonic	Chromatin bound	lncRNA_intergenic	12.164
642	ERVK3-1	ERVK3-1	ASO_G0142396_01	57.461	1	24.116	exonic	Nuclear soluble	lncRNA_sense_intronic	44.431
643	ERVK3-1	ERVK3-1	ASO_G0142396_02	77.491	1	31.998	exonic	Nuclear soluble	lncRNA_sense_intronic	44.431
644	ERVK3-1	ERVK3-1	ASO_G0142396_03	62.186	1	44.429	exonic	Nuclear soluble	lncRNA_sense_intronic	44.431
645	ERVK3-1	ERVK3-1	ASO_G0142396_06	36.928	0	27.016	exonic	Nuclear soluble	lncRNA_sense_intronic	44.431
646	ERVK3-1	ERVK3-1	ASO_G0142396_08	76.51	1	57.231	exonic	Nuclear soluble	lncRNA_sense_intronic	44.431
647	ERVK3-1	ERVK3-1	ASO_G0142396_AD_01	96.089	1	84.392	exonic	Nuclear soluble	lncRNA_sense_intronic	44.431
648	ERVK3-1	ERVK3-1	ASO_G0142396_AD_02	88.915	1	63.399	exonic	Nuclear soluble	lncRNA_sense_intronic	44.431
649	ERVK3-1	ERVK3-1	ASO_G0142396_AD_05	36.072	0	21.129	exonic	Nuclear soluble	lncRNA_sense_intronic	44.431
650	ERVK3-1	ERVK3-1	ASO_G0142396_AD_07	97.73	1	83.448	exonic	Nuclear soluble	lncRNA_sense_intronic	44.431
651	ERVK3-1	ERVK3-1	ASO_G0142396_AD_08	39.039	0	45.272	exonic	Nuclear soluble	lncRNA_sense_intronic	44.431
652	FBXL19-AS1	FBXL19-AS1	ASO_G0260852_01	18.296	0	7.73	exonic	Nuclear soluble	lncRNA_divergent	2.212
653	FBXL19-AS1	FBXL19-AS1	ASO_G0260852_02	60.677	1	61.722	exonic	Nuclear soluble	lncRNA_divergent	2.212
654	FBXL19-AS1	FBXL19-AS1	ASO_G0260852_04	-15.518	0	16.016	exonic	Nuclear soluble	lncRNA_divergent	2.212
655	FBXL19-AS1	FBXL19-AS1	ASO_G0260852_07	25.494	0	7.456	exonic	Nuclear soluble	lncRNA_divergent	2.212
656	FBXL19-AS1	FBXL19-AS1	ASO_G0260852_08	16.744	0	45.333	exonic	Nuclear soluble	lncRNA_divergent	2.212
657	FBXL19-AS1	FBXL19-AS1	ASO_G0260852_AD_01	0	0	42.109	exonic	Nuclear soluble	lncRNA_divergent	2.212
658	FBXL19-AS1	FBXL19-AS1	ASO_G0260852_AD_02	0	0	22.749	exonic	Nuclear soluble	lncRNA_divergent	2.212
659	FBXL19-AS1	FBXL19-AS1	ASO_G0260852_AD_03	0	0	-11.04	exonic	Nuclear soluble	lncRNA_divergent	2.212
660	FBXL19-AS1	FBXL19-AS1	ASO_G0260852_AD_05	0	0	26.405	exonic	Nuclear soluble	lncRNA_divergent	2.212
661	FBXL19-AS1	FBXL19-AS1	ASO_G0260852_AD_09	0	0	21.05	exonic	Nuclear soluble	lncRNA_divergent	2.212
662	FGD5-AS1	FGD5-AS1	ASO_G0225733_01	45.23	0	38.004	exonic	Cytoplasmic	lncRNA_divergent	77.283
663	FGD5-AS1	FGD5-AS1	ASO_G0225733_02	54.745	1	31.088	exonic	Cytoplasmic	lncRNA_divergent	77.283
664	FGD5-AS1	FGD5-AS1	ASO_G0225733_03	86.62	1	76.063	exonic	Cytoplasmic	lncRNA_divergent	77.283
665	FGD5-AS1	FGD5-AS1	ASO_G0225733_04	92.686	1	82.291	exonic	Cytoplasmic	lncRNA_divergent	77.283
666	FGD5-AS1	FGD5-AS1	ASO_G0225733_05	82.944	1	59.768	exonic	Cytoplasmic	lncRNA_divergent	77.283
667	FGD5-AS1	FGD5-AS1	ASO_G0225733_AD_03	97.556	1	87.806	exonic	Cytoplasmic	lncRNA_divergent	77.283
668	FGD5-AS1	FGD5-AS1	ASO_G0225733_AD_04	78.153	1	18.627	intronic	Cytoplasmic	lncRNA_divergent	77.283
669	FGD5-AS1	FGD5-AS1	ASO_G0225733_AD_06	85.353	1	81.686	exonic	Cytoplasmic	lncRNA_divergent	77.283
670	FGD5-AS1	FGD5-AS1	ASO_G0225733_AD_07	76.54	1	31.915	exonic	Cytoplasmic	lncRNA_divergent	77.283
671	FGD5-AS1	FGD5-AS1	ASO_G0225733_AD_08	63.441	1	-4.091	intronic	Cytoplasmic	lncRNA_divergent	77.283
672	FLVCR1-DT	FLVCR1-AS1	ASO_G0198468_01	43.244	0	59.124	exonic	Nuclear soluble	lncRNA_divergent	2.587
673	FLVCR1-DT	FLVCR1-AS1	ASO_G0198468_03	62.566	1	75.391	exonic	Nuclear soluble	lncRNA_divergent	2.587
674	FLVCR1-DT	FLVCR1-AS1	ASO_G0198468_06	26.587	0	42.586	exonic	Nuclear soluble	lncRNA_divergent	2.587
675	FLVCR1-DT	FLVCR1-AS1	ASO_G0198468_07	22.803	0	63.095	exonic	Nuclear soluble	lncRNA_divergent	2.587
676	FLVCR1-DT	FLVCR1-AS1	ASO_G0198468_09	36.813	0	43.882	exonic	Nuclear soluble	lncRNA_divergent	2.587
677	FOXN3-AS1	FOXN3-AS1	ASO_G0258920_01	93.642	1	71.505	exonic	Cytoplasmic	lncRNA_divergent	3.287
678	FOXN3-AS1	FOXN3-AS1	ASO_G0258920_02	23.971	0	15.604	exonic	Cytoplasmic	lncRNA_divergent	3.287
679	FOXN3-AS1	FOXN3-AS1	ASO_G0258920_03	35.617	0	48.615	exonic	Cytoplasmic	lncRNA_divergent	3.287
680	FOXN3-AS1	FOXN3-AS1	ASO_G0258920_07	22.458	0	24.974	exonic	Cytoplasmic	lncRNA_divergent	3.287
681	FOXN3-AS1	FOXN3-AS1	ASO_G0258920_08	-8.768	0	21.646	exonic	Cytoplasmic	lncRNA_divergent	3.287
682	FOXN3-AS1	FOXN3-AS1	ASO_G0258920_AD_02	3.217	0	32.151	exonic	Cytoplasmic	lncRNA_divergent	3.287
683	FOXN3-AS1	FOXN3-AS1	ASO_G0258920_AD_07	0.536	0	36.906	intronic	Cytoplasmic	lncRNA_divergent	3.287
684	FOXN3-AS1	FOXN3-AS1	ASO_G0258920_AD_09	56.868	0	28.276	exonic	Cytoplasmic	lncRNA_divergent	3.287
685	FOXN3-AS1	FOXN3-AS1	ASO_G0258920_AD_10	41.634	0	13.303	intronic	Cytoplasmic	lncRNA_divergent	3.287
686	FTX	FTX	ASO_G0230590_01	82.226	1	31.885	exonic	Chromatin bound	lncRNA_intergenic	29.951
687	FTX	FTX	ASO_G0230590_02	42.499	0	-138.848	exonic	Chromatin bound	lncRNA_intergenic	29.951
688	FTX	FTX	ASO_G0230590_03	83.137	1	-4.978	exonic	Chromatin bound	lncRNA_intergenic	29.951
689	FTX	FTX	ASO_G0230590_05	56.267	1	-101.309	exonic	Chromatin bound	lncRNA_intergenic	29.951
690	FTX	FTX	ASO_G0230590_06	86.514	1	-33.957	exonic	Chromatin bound	lncRNA_intergenic	29.951
691	FTX	FTX	ASO_G0230590_AD_02	92.101	1	79.456	intronic	Chromatin bound	lncRNA_intergenic	29.951
692	FTX	FTX	ASO_G0230590_AD_03	80.769	1	75.671	exonic	Chromatin bound	lncRNA_intergenic	29.951
693	FTX	FTX	ASO_G0230590_AD_04	68.169	1	16.997	exonic	Chromatin bound	lncRNA_intergenic	29.951
694	FTX	FTX	ASO_G0230590_AD_07	46.47	1	29.142	exonic	Chromatin bound	lncRNA_intergenic	29.951
695	FTX	FTX	ASO_G0230590_AD_08	42.454	0	28.925	intronic	Chromatin bound	lncRNA_intergenic	29.951
696	GAS6-DT	GAS6-AS2	ASO_G0272695_01	33.428	0	25.326	exonic	Cytoplasmic	lncRNA_divergent	8.197
697	GAS6-DT	GAS6-AS2	ASO_G0272695_02	8.263	0	50.295	exonic	Cytoplasmic	lncRNA_divergent	8.197
698	GAS6-DT	GAS6-AS2	ASO_G0272695_03	-4.892	0	0.114	exonic	Cytoplasmic	lncRNA_divergent	8.197
699	GAS6-DT	GAS6-AS2	ASO_G0272695_04	28.391	0	21.657	exonic	Cytoplasmic	lncRNA_divergent	8.197
700	GAS6-DT	GAS6-AS2	ASO_G0272695_05	18.218	0	22.747	exonic	Cytoplasmic	lncRNA_divergent	8.197
701	GS1-124K5.4	GS1-124K5.4	ASO_G0237310_05	64.141	1	68.315	exonic	Nuclear soluble	lncRNA_intergenic	5.573
702	GS1-124K5.4	GS1-124K5.4	ASO_G0237310_06	50.069	1	35.332	exonic	Nuclear soluble	lncRNA_intergenic	5.573
703	GS1-124K5.4	GS1-124K5.4	ASO_G0237310_07	-3.288	0	9.422	exonic	Nuclear soluble	lncRNA_intergenic	5.573
704	GS1-124K5.4	GS1-124K5.4	ASO_G0237310_08	-8.126	0	12.603	exonic	Nuclear soluble	lncRNA_intergenic	5.573
705	GS1-124K5.4	GS1-124K5.4	ASO_G0237310_09	32.642	0	13.878	exonic	Nuclear soluble	lncRNA_intergenic	5.573
706	GS1-124K5.4	GS1-124K5.4	ASO_G0237310_AD_02	15.57	0	-3.09188e+07	exonic	Nuclear soluble	lncRNA_intergenic	5.573
707	GS1-124K5.4	GS1-124K5.4	ASO_G0237310_AD_03	66.325	1	42.097	exonic	Nuclear soluble	lncRNA_intergenic	5.573
708	GS1-124K5.4	GS1-124K5.4	ASO_G0237310_AD_05	-26.261	0	47.56	exonic	Nuclear soluble	lncRNA_intergenic	5.573
709	GS1-124K5.4	GS1-124K5.4	ASO_G0237310_AD_08	31.876	0	44.95	exonic	Nuclear soluble	lncRNA_intergenic	5.573
710	GS1-124K5.4	GS1-124K5.4	ASO_G0237310_AD_10	18.538	0	11.876	exonic	Nuclear soluble	lncRNA_intergenic	5.573
711	OTUD6B-AS1	GS1-251I9.4	ASO_G0253738_01	67.499	1	44.346	exonic	Cytoplasmic	lncRNA_divergent	24.611
712	OTUD6B-AS1	GS1-251I9.4	ASO_G0253738_02	80.875	1	54.539	exonic	Cytoplasmic	lncRNA_divergent	24.611
713	OTUD6B-AS1	GS1-251I9.4	ASO_G0253738_03	68.351	1	18.317	exonic	Cytoplasmic	lncRNA_divergent	24.611
714	OTUD6B-AS1	GS1-251I9.4	ASO_G0253738_05	63.468	1	5.007	exonic	Cytoplasmic	lncRNA_divergent	24.611
715	OTUD6B-AS1	GS1-251I9.4	ASO_G0253738_07	77.079	1	42.581	exonic	Cytoplasmic	lncRNA_divergent	24.611
716	HCG11	HCG11	ASO_G0228223_01	35.897	0	16.384	exonic	Cytoplasmic	lncRNA_intergenic	5.69
717	HCG11	HCG11	ASO_G0228223_02	71.626	1	50.928	exonic	Cytoplasmic	lncRNA_intergenic	5.69
718	HCG11	HCG11	ASO_G0228223_03	35.472	0	11.054	exonic	Cytoplasmic	lncRNA_intergenic	5.69
719	HCG11	HCG11	ASO_G0228223_05	38.128	0	4.17	exonic	Cytoplasmic	lncRNA_intergenic	5.69
720	HCG11	HCG11	ASO_G0228223_06	31.177	0	13.436	exonic	Cytoplasmic	lncRNA_intergenic	5.69
721	HCG11	HCG11	ASO_G0228223_AD_01	26.753	0	33.297	exonic	Cytoplasmic	lncRNA_intergenic	5.69
722	HCG11	HCG11	ASO_G0228223_AD_07	35.936	0	15.866	exonic	Cytoplasmic	lncRNA_intergenic	5.69
723	HCG11	HCG11	ASO_G0228223_AD_08	12.633	0	46.594	exonic	Cytoplasmic	lncRNA_intergenic	5.69
724	HCG11	HCG11	ASO_G0228223_AD_09	17.662	0	8.386	exonic	Cytoplasmic	lncRNA_intergenic	5.69
725	HCG11	HCG11	ASO_G0228223_AD_10	9.072	0	30.017	exonic	Cytoplasmic	lncRNA_intergenic	5.69
726	HOXB-AS1	HOXB-AS1	ASO_G0230148_02	41.644	0	17.184	exonic	Nuclear soluble	lncRNA_intergenic	1.815
727	HOXB-AS1	HOXB-AS1	ASO_G0230148_05	31.443	0	-5.69	exonic	Nuclear soluble	lncRNA_intergenic	1.815
728	HOXB-AS1	HOXB-AS1	ASO_G0230148_06	40.331	0	-7.337	exonic	Nuclear soluble	lncRNA_intergenic	1.815
729	HOXB-AS1	HOXB-AS1	ASO_G0230148_07	42.067	0	40.485	exonic	Nuclear soluble	lncRNA_intergenic	1.815
730	HOXB-AS1	HOXB-AS1	ASO_G0230148_09	25.65	0	-8.699	exonic	Nuclear soluble	lncRNA_intergenic	1.815
731	HOXD-AS2	HOXD-AS2	ASO_G0237380_01	97.571	1	87.941	exonic	Cytoplasmic	lncRNA_divergent	11.79
732	HOXD-AS2	HOXD-AS2	ASO_G0237380_02	0.586	0	14.702	exonic	Cytoplasmic	lncRNA_divergent	11.79
733	HOXD-AS2	HOXD-AS2	ASO_G0237380_04	23.468	0	-13.03	exonic	Cytoplasmic	lncRNA_divergent	11.79
734	HOXD-AS2	HOXD-AS2	ASO_G0237380_05	30.588	0	24.142	exonic	Cytoplasmic	lncRNA_divergent	11.79
735	HOXD-AS2	HOXD-AS2	ASO_G0237380_07	18.722	0	21.69	exonic	Cytoplasmic	lncRNA_divergent	11.79
736	HOXD-AS2	HOXD-AS2	ASO_G0237380_AD_01	0	0	12.03	intronic	Cytoplasmic	lncRNA_divergent	11.79
737	HOXD-AS2	HOXD-AS2	ASO_G0237380_AD_02	0	0	44.199	intronic	Cytoplasmic	lncRNA_divergent	11.79
738	HOXD-AS2	HOXD-AS2	ASO_G0237380_AD_03	0	0	6.822	intronic	Cytoplasmic	lncRNA_divergent	11.79
739	HOXD-AS2	HOXD-AS2	ASO_G0237380_AD_04	0	0	17.881	exonic	Cytoplasmic	lncRNA_divergent	11.79
740	HOXD-AS2	HOXD-AS2	ASO_G0237380_AD_08	0	0	40.528	intronic	Cytoplasmic	lncRNA_divergent	11.79
741	JPX	JPX	ASO_G0225470_01	65.988	1	43.995	exonic	Chromatin bound	lncRNA_intergenic	34.183
742	JPX	JPX	ASO_G0225470_02	57.658	1	14.186	exonic	Chromatin bound	lncRNA_intergenic	34.183
743	JPX	JPX	ASO_G0225470_03	22.151	0	8.938	exonic	Chromatin bound	lncRNA_intergenic	34.183
744	JPX	JPX	ASO_G0225470_04	32.637	0	13.607	exonic	Chromatin bound	lncRNA_intergenic	34.183
745	JPX	JPX	ASO_G0225470_05	74.33	1	71.595	exonic	Chromatin bound	lncRNA_intergenic	34.183
746	JPX	JPX	ASO_G0225470_AD_03	41.483	0	27.385	intronic	Chromatin bound	lncRNA_intergenic	34.183
747	JPX	JPX	ASO_G0225470_AD_04	97.42	1	84.913	exonic	Chromatin bound	lncRNA_intergenic	34.183
748	JPX	JPX	ASO_G0225470_AD_05	62.723	1	44.706	exonic	Chromatin bound	lncRNA_intergenic	34.183
749	JPX	JPX	ASO_G0225470_AD_09	61.772	1	41.109	exonic	Chromatin bound	lncRNA_intergenic	34.183
750	JPX	JPX	ASO_G0225470_AD_10	25.135	0	25.462	exonic	Chromatin bound	lncRNA_intergenic	34.183
751	KANSL1-AS1	KANSL1-AS1	ASO_G0214401_01	70.41	1	29.932	exonic	Cytoplasmic	lncRNA_divergent	2.477
752	KANSL1-AS1	KANSL1-AS1	ASO_G0214401_02	60.183	1	7.986	exonic	Cytoplasmic	lncRNA_divergent	2.477
753	KANSL1-AS1	KANSL1-AS1	ASO_G0214401_03	61.246	1	1.332	exonic	Cytoplasmic	lncRNA_divergent	2.477
754	KANSL1-AS1	KANSL1-AS1	ASO_G0214401_06	71.403	1	0	exonic	Cytoplasmic	lncRNA_divergent	2.477
755	KANSL1-AS1	KANSL1-AS1	ASO_G0214401_10	-6.651	0	0	exonic	Cytoplasmic	lncRNA_divergent	2.477
756	KTN1-AS1	KTN1-AS1	ASO_G0186615_03	49.343	0	55.327	exonic	Chromatin bound	lncRNA_divergent	3.145
757	KTN1-AS1	KTN1-AS1	ASO_G0186615_04	66.562	1	77.991	exonic	Chromatin bound	lncRNA_divergent	3.145
758	KTN1-AS1	KTN1-AS1	ASO_G0186615_06	35.358	0	56.797	exonic	Chromatin bound	lncRNA_divergent	3.145
759	KTN1-AS1	KTN1-AS1	ASO_G0186615_09	49.043	0	60.014	exonic	Chromatin bound	lncRNA_divergent	3.145
760	KTN1-AS1	KTN1-AS1	ASO_G0186615_10	63.592	1	56.895	exonic	Chromatin bound	lncRNA_divergent	3.145
761	CYTOR	LINC00152	ASO_G0222041_01	53.601	1	37.566	exonic	Chromatin bound	lncRNA_intergenic	191.35
762	CYTOR	LINC00152	ASO_G0222041_02	57.275	1	38.877	exonic	Chromatin bound	lncRNA_intergenic	191.35
763	CYTOR	LINC00152	ASO_G0222041_03	41.039	0	50.374	exonic	Chromatin bound	lncRNA_intergenic	191.35
764	CYTOR	LINC00152	ASO_G0222041_04	81.248	1	67.311	exonic	Chromatin bound	lncRNA_intergenic	191.35
765	CYTOR	LINC00152	ASO_G0222041_06	13.648	0	28.158	exonic	Chromatin bound	lncRNA_intergenic	191.35
766	CYTOR	LINC00152	ASO_G0222041_AD_01	64.807	1	63.613	exonic	Chromatin bound	lncRNA_intergenic	191.35
767	CYTOR	LINC00152	ASO_G0222041_AD_06	7.869	0	21.635	intronic	Chromatin bound	lncRNA_intergenic	191.35
768	CYTOR	LINC00152	ASO_G0222041_AD_07	80.1	1	78.747	intronic	Chromatin bound	lncRNA_intergenic	191.35
769	CYTOR	LINC00152	ASO_G0222041_AD_08	89.361	1	58.939	exonic	Chromatin bound	lncRNA_intergenic	191.35
770	CYTOR	LINC00152	ASO_G0222041_AD_10	60.467	1	20.782	intronic	Chromatin bound	lncRNA_intergenic	191.35
771	OLMALINC	LINC00263	ASO_G0235823_01	33.394	0	31.441	exonic	Nuclear soluble	lncRNA_intergenic	5.577
772	OLMALINC	LINC00263	ASO_G0235823_03	-20.214	0	66.194	exonic	Nuclear soluble	lncRNA_intergenic	5.577
773	OLMALINC	LINC00263	ASO_G0235823_06	-17.979	0	39.328	exonic	Nuclear soluble	lncRNA_intergenic	5.577
774	OLMALINC	LINC00263	ASO_G0235823_07	10.913	0	47.143	exonic	Nuclear soluble	lncRNA_intergenic	5.577
775	OLMALINC	LINC00263	ASO_G0235823_10	65.745	1	49.996	exonic	Nuclear soluble	lncRNA_intergenic	5.577
776	OLMALINC	LINC00263	ASO_G0235823_AD_01	0	0	69.425	exonic	Nuclear soluble	lncRNA_intergenic	5.577
777	OLMALINC	LINC00263	ASO_G0235823_AD_04	0	0	61.427	exonic	Nuclear soluble	lncRNA_intergenic	5.577
778	OLMALINC	LINC00263	ASO_G0235823_AD_06	0	0	58.248	intronic	Nuclear soluble	lncRNA_intergenic	5.577
779	OLMALINC	LINC00263	ASO_G0235823_AD_08	0	0	55.566	intronic	Nuclear soluble	lncRNA_intergenic	5.577
780	OLMALINC	LINC00263	ASO_G0235823_AD_10	0	0	62.248	exonic	Nuclear soluble	lncRNA_intergenic	5.577
781	LINC00339	LINC00339	ASO_G0218510_01	55.731	0	15.647	exonic	Nuclear soluble	lncRNA_intergenic	11.139
782	LINC00339	LINC00339	ASO_G0218510_02	13.666	0	16.834	exonic	Nuclear soluble	lncRNA_intergenic	11.139
783	LINC00339	LINC00339	ASO_G0218510_03	44.299	0	21.939	exonic	Nuclear soluble	lncRNA_intergenic	11.139
784	LINC00339	LINC00339	ASO_G0218510_04	83.318	1	80.544	exonic	Nuclear soluble	lncRNA_intergenic	11.139
785	LINC00339	LINC00339	ASO_G0218510_05	60.106	1	43.136	exonic	Nuclear soluble	lncRNA_intergenic	11.139
786	LINC00339	LINC00339	ASO_G0218510_AD_03	91.961	1	74.926	exonic	Nuclear soluble	lncRNA_intergenic	11.139
787	LINC00339	LINC00339	ASO_G0218510_AD_05	75.722	1	40.722	exonic	Nuclear soluble	lncRNA_intergenic	11.139
788	LINC00339	LINC00339	ASO_G0218510_AD_06	95.002	1	76.078	exonic	Nuclear soluble	lncRNA_intergenic	11.139
789	LINC00339	LINC00339	ASO_G0218510_AD_09	93.554	1	54.524	exonic	Nuclear soluble	lncRNA_intergenic	11.139
790	LINC00339	LINC00339	ASO_G0218510_AD_10	50.849	0	38.837	exonic	Nuclear soluble	lncRNA_intergenic	11.139
791	LINC00467	LINC00467	ASO_G0153363_02	55.584	1	46.807	exonic	Cytoplasmic	lncRNA_intergenic	23.03
792	LINC00467	LINC00467	ASO_G0153363_03	36.86	0	1.921	exonic	Cytoplasmic	lncRNA_intergenic	23.03
793	LINC00467	LINC00467	ASO_G0153363_05	24.85	0	54.75	exonic	Cytoplasmic	lncRNA_intergenic	23.03
794	LINC00467	LINC00467	ASO_G0153363_08	27.617	0	17.726	exonic	Cytoplasmic	lncRNA_intergenic	23.03
795	LINC00467	LINC00467	ASO_G0153363_09	33.576	0	52.119	exonic	Cytoplasmic	lncRNA_intergenic	23.03
796	SMIM26	LINC00493	ASO_G0232388_03	38.177	0	8.083	exonic	Cytoplasmic	lncRNA_intergenic	40.021
797	SMIM26	LINC00493	ASO_G0232388_04	63.576	1	9.49	exonic	Cytoplasmic	lncRNA_intergenic	40.021
798	SMIM26	LINC00493	ASO_G0232388_05	39.044	0	14.919	exonic	Cytoplasmic	lncRNA_intergenic	40.021
799	SMIM26	LINC00493	ASO_G0232388_06	5.049	0	11.268	exonic	Cytoplasmic	lncRNA_intergenic	40.021
800	SMIM26	LINC00493	ASO_G0232388_07	20.158	0	-2.343	exonic	Cytoplasmic	lncRNA_intergenic	40.021
801	SMIM26	LINC00493	ASO_G0232388_AD_02	9.682	0	54.431	exonic	Cytoplasmic	lncRNA_intergenic	40.021
802	SMIM26	LINC00493	ASO_G0232388_AD_03	73.019	1	58.498	exonic	Cytoplasmic	lncRNA_intergenic	40.021
803	SMIM26	LINC00493	ASO_G0232388_AD_04	-2.834	0	37.17	intronic	Cytoplasmic	lncRNA_intergenic	40.021
804	SMIM26	LINC00493	ASO_G0232388_AD_08	35.14	0	56.509	exonic	Cytoplasmic	lncRNA_intergenic	40.021
805	SMIM26	LINC00493	ASO_G0232388_AD_09	-27.643	0	51.692	exonic	Cytoplasmic	lncRNA_intergenic	40.021
806	LINC00511	LINC00511	ASO_G0227036_01	36.343	0	14.988	exonic	Chromatin bound	lncRNA_intergenic	2.901
807	LINC00511	LINC00511	ASO_G0227036_02	61.511	1	35.595	exonic	Chromatin bound	lncRNA_intergenic	2.901
808	LINC00511	LINC00511	ASO_G0227036_03	-5.195	0	21.723	exonic	Chromatin bound	lncRNA_intergenic	2.901
809	LINC00511	LINC00511	ASO_G0227036_04	58.474	0	72.119	exonic	Chromatin bound	lncRNA_intergenic	2.901
810	LINC00511	LINC00511	ASO_G0227036_08	40.689	0	24.93	exonic	Chromatin bound	lncRNA_intergenic	2.901
811	LINC00511	LINC00511	ASO_G0227036_AD_03	36.266	0	30.382	intronic	Chromatin bound	lncRNA_intergenic	2.901
812	LINC00511	LINC00511	ASO_G0227036_AD_04	3.137	0	25.366	intronic	Chromatin bound	lncRNA_intergenic	2.901
813	LINC00511	LINC00511	ASO_G0227036_AD_05	46.743	1	45.976	intronic	Chromatin bound	lncRNA_intergenic	2.901
814	LINC00511	LINC00511	ASO_G0227036_AD_07	38.462	0	69.24	intronic	Chromatin bound	lncRNA_intergenic	2.901
815	LINC00511	LINC00511	ASO_G0227036_AD_10	65.024	1	63.126	intronic	Chromatin bound	lncRNA_intergenic	2.901
816	LINC00517	LINC00517	ASO_G0259091_01	43.115	0	75.59	exonic	Cytoplasmic	lncRNA_antisense	6.505
817	LINC00517	LINC00517	ASO_G0259091_02	75.625	1	28.385	exonic	Cytoplasmic	lncRNA_antisense	6.505
818	LINC00517	LINC00517	ASO_G0259091_05	72.202	1	46.099	exonic	Cytoplasmic	lncRNA_antisense	6.505
819	LINC00517	LINC00517	ASO_G0259091_06	78.23	1	27.813	exonic	Cytoplasmic	lncRNA_antisense	6.505
820	LINC00517	LINC00517	ASO_G0259091_09	5.046	0	42.27	exonic	Cytoplasmic	lncRNA_antisense	6.505
821	LINC00517	LINC00517	ASO_G0259091_AD_03	34.238	0	-0.433	intronic	Cytoplasmic	lncRNA_antisense	6.505
822	LINC00517	LINC00517	ASO_G0259091_AD_04	94.145	1	85.579	intronic	Cytoplasmic	lncRNA_antisense	6.505
823	LINC00517	LINC00517	ASO_G0259091_AD_06	29.228	0	1.078	exonic	Cytoplasmic	lncRNA_antisense	6.505
824	LINC00517	LINC00517	ASO_G0259091_AD_07	67.12	1	38.759	exonic	Cytoplasmic	lncRNA_antisense	6.505
825	LINC00517	LINC00517	ASO_G0259091_AD_10	58.587	1	5.736	intronic	Cytoplasmic	lncRNA_antisense	6.505
826	LINC00630	LINC00630	ASO_G0223546_01	74.402	1	64.278	exonic	Chromatin bound	lncRNA_sense_intronic	17.944
827	LINC00630	LINC00630	ASO_G0223546_02	99.048	1	98.509	exonic	Chromatin bound	lncRNA_sense_intronic	17.944
828	LINC00630	LINC00630	ASO_G0223546_04	62.756	1	53.955	exonic	Chromatin bound	lncRNA_sense_intronic	17.944
829	LINC00630	LINC00630	ASO_G0223546_05	8.57	0	20.045	exonic	Chromatin bound	lncRNA_sense_intronic	17.944
830	LINC00630	LINC00630	ASO_G0223546_09	73.449	1	41.829	exonic	Chromatin bound	lncRNA_sense_intronic	17.944
831	LINC00654	LINC00654	ASO_G0205181_01	83.305	1	83.651	exonic	Cytoplasmic	lncRNA_intergenic	8.384
832	LINC00654	LINC00654	ASO_G0205181_02	47.092	0	32.401	exonic	Cytoplasmic	lncRNA_intergenic	8.384
833	LINC00654	LINC00654	ASO_G0205181_03	55.679	0	36.049	exonic	Cytoplasmic	lncRNA_intergenic	8.384
834	LINC00654	LINC00654	ASO_G0205181_04	47.84	0	37.639	exonic	Cytoplasmic	lncRNA_intergenic	8.384
835	LINC00654	LINC00654	ASO_G0205181_05	30.717	0	39.844	exonic	Cytoplasmic	lncRNA_intergenic	8.384
836	LINC00654	LINC00654	ASO_G0205181_AD_01	61.55	1	5.872	exonic	Cytoplasmic	lncRNA_intergenic	8.384
837	LINC00654	LINC00654	ASO_G0205181_AD_02	49.656	1	2.12	exonic	Cytoplasmic	lncRNA_intergenic	8.384
838	LINC00654	LINC00654	ASO_G0205181_AD_03	62.176	1	-7.796	exonic	Cytoplasmic	lncRNA_intergenic	8.384
839	LINC00654	LINC00654	ASO_G0205181_AD_05	62.044	1	47.132	intronic	Cytoplasmic	lncRNA_intergenic	8.384
840	LINC00654	LINC00654	ASO_G0205181_AD_10	18.614	0	3.793	intronic	Cytoplasmic	lncRNA_intergenic	8.384
841	NORAD	LINC00657	ASO_G0260032_01	0	0	16.374	exonic	Cytoplasmic	lncRNA_intergenic	57.561
842	NORAD	LINC00657	ASO_G0260032_02	0	0	8.501	exonic	Cytoplasmic	lncRNA_intergenic	57.561
843	NORAD	LINC00657	ASO_G0260032_04	0	0	13.722	exonic	Cytoplasmic	lncRNA_intergenic	57.561
844	NORAD	LINC00657	ASO_G0260032_05	0	0	12.851	exonic	Cytoplasmic	lncRNA_intergenic	57.561
845	NORAD	LINC00657	ASO_G0260032_06	0	0	14.352	exonic	Cytoplasmic	lncRNA_intergenic	57.561
846	NORAD	LINC00657	ASO_G0260032_AD_01	91.385	1	83.974	exonic	Cytoplasmic	lncRNA_intergenic	57.561
847	NORAD	LINC00657	ASO_G0260032_AD_06	77.046	1	79.761	exonic	Cytoplasmic	lncRNA_intergenic	57.561
848	NORAD	LINC00657	ASO_G0260032_AD_07	20.762	0	24.713	exonic	Cytoplasmic	lncRNA_intergenic	57.561
849	NORAD	LINC00657	ASO_G0260032_AD_08	70.33	1	48.932	exonic	Cytoplasmic	lncRNA_intergenic	57.561
850	NORAD	LINC00657	ASO_G0260032_AD_10	88.753	1	49.463	exonic	Cytoplasmic	lncRNA_intergenic	57.561
851	LINC00662	LINC00662	ASO_G0261824_02	38.376	0	-20.983	exonic	Chromatin bound	lncRNA_intergenic	10.11
852	LINC00662	LINC00662	ASO_G0261824_04	44.151	0	-3.224	exonic	Chromatin bound	lncRNA_intergenic	10.11
853	LINC00662	LINC00662	ASO_G0261824_05	40.439	0	-19.781	exonic	Chromatin bound	lncRNA_intergenic	10.11
854	LINC00662	LINC00662	ASO_G0261824_07	30.554	0	1.992	exonic	Chromatin bound	lncRNA_intergenic	10.11
855	LINC00662	LINC00662	ASO_G0261824_08	66.783	1	-17.49	exonic	Chromatin bound	lncRNA_intergenic	10.11
856	LINC00667	LINC00667	ASO_G0263753_01	73.54	1	73.422	exonic	Cytoplasmic	lncRNA_intergenic	31.264
857	LINC00667	LINC00667	ASO_G0263753_05	55.851	1	36.714	exonic	Cytoplasmic	lncRNA_intergenic	31.264
858	LINC00667	LINC00667	ASO_G0263753_06	39.14	0	37.909	exonic	Cytoplasmic	lncRNA_intergenic	31.264
859	LINC00667	LINC00667	ASO_G0263753_08	49.231	1	32.443	exonic	Cytoplasmic	lncRNA_intergenic	31.264
860	LINC00667	LINC00667	ASO_G0263753_10	58.456	1	42.187	exonic	Cytoplasmic	lncRNA_intergenic	31.264
861	LINC00667	LINC00667	ASO_G0263753_AD_01	96.191	1	94.814	exonic	Cytoplasmic	lncRNA_intergenic	31.264
862	LINC00667	LINC00667	ASO_G0263753_AD_02	66.009	1	31.415	exonic	Cytoplasmic	lncRNA_intergenic	31.264
863	LINC00667	LINC00667	ASO_G0263753_AD_04	65.428	1	19.767	exonic	Cytoplasmic	lncRNA_intergenic	31.264
864	LINC00667	LINC00667	ASO_G0263753_AD_06	95.049	1	80.432	exonic	Cytoplasmic	lncRNA_intergenic	31.264
865	LINC00667	LINC00667	ASO_G0263753_AD_09	70.675	1	25.359	exonic	Cytoplasmic	lncRNA_intergenic	31.264
866	LINC00674	LINC00674	ASO_G0237854_02	77.891	0	39.998	exonic	Nuclear soluble	pseudogene	25.568
867	LINC00674	LINC00674	ASO_G0237854_04	23.936	0	13.367	exonic	Nuclear soluble	pseudogene	25.568
868	LINC00674	LINC00674	ASO_G0237854_05	90.453	0	60.621	exonic	Nuclear soluble	pseudogene	25.568
869	LINC00674	LINC00674	ASO_G0237854_06	20.384	0	-1.28	exonic	Nuclear soluble	pseudogene	25.568
870	LINC00674	LINC00674	ASO_G0237854_10	39.882	0	7.45	exonic	Nuclear soluble	pseudogene	25.568
871	LINC00674	LINC00674	ASO_G0237854_AD_02	75.814	1	56.888	exonic	Nuclear soluble	pseudogene	25.568
872	LINC00674	LINC00674	ASO_G0237854_AD_04	84.899	1	71.79	intronic	Nuclear soluble	pseudogene	25.568
873	LINC00674	LINC00674	ASO_G0237854_AD_06	27.974	0	61.924	exonic	Nuclear soluble	pseudogene	25.568
874	LINC00674	LINC00674	ASO_G0237854_AD_08	62.179	1	52.053	intronic	Nuclear soluble	pseudogene	25.568
875	LINC00674	LINC00674	ASO_G0237854_AD_10	70.234	1	48.957	exonic	Nuclear soluble	pseudogene	25.568
876	LINC00702	LINC00702	ASO_G0233117_01	39.202	0	42.302	exonic	Nuclear soluble	lncRNA_intergenic	1.005
877	LINC00702	LINC00702	ASO_G0233117_02	84.24	1	97.264	exonic	Nuclear soluble	lncRNA_intergenic	1.005
878	LINC00702	LINC00702	ASO_G0233117_03	5.162	0	46.009	exonic	Nuclear soluble	lncRNA_intergenic	1.005
879	LINC00702	LINC00702	ASO_G0233117_04	81.478	1	88.905	exonic	Nuclear soluble	lncRNA_intergenic	1.005
880	LINC00702	LINC00702	ASO_G0233117_10	55.173	0	45.396	exonic	Nuclear soluble	lncRNA_intergenic	1.005
881	LINC00702	LINC00702	ASO_G0233117_AD_03	53.972	0	42.165	exonic	Nuclear soluble	lncRNA_intergenic	1.005
882	LINC00702	LINC00702	ASO_G0233117_AD_04	46.574	0	34.578	exonic	Nuclear soluble	lncRNA_intergenic	1.005
883	LINC00702	LINC00702	ASO_G0233117_AD_07	89.539	1	62.312	exonic	Nuclear soluble	lncRNA_intergenic	1.005
884	LINC00702	LINC00702	ASO_G0233117_AD_08	47.4	0	41.124	intronic	Nuclear soluble	lncRNA_intergenic	1.005
885	LINC00702	LINC00702	ASO_G0233117_AD_09	85.044	1	65.853	intronic	Nuclear soluble	lncRNA_intergenic	1.005
886	LINC00707	LINC00707	ASO_G0238266_01	17.065	0	7.013	exonic	Cytoplasmic	lncRNA_intergenic	0.752
887	LINC00707	LINC00707	ASO_G0238266_03	40.222	0	66.814	exonic	Cytoplasmic	lncRNA_intergenic	0.752
888	LINC00707	LINC00707	ASO_G0238266_04	35.729	0	9.493	exonic	Cytoplasmic	lncRNA_intergenic	0.752
889	LINC00707	LINC00707	ASO_G0238266_05	28.086	0	0.361	exonic	Cytoplasmic	lncRNA_intergenic	0.752
890	LINC00707	LINC00707	ASO_G0238266_06	47.442	0	46.141	exonic	Cytoplasmic	lncRNA_intergenic	0.752
891	LINC00707	LINC00707	ASO_G0238266_AD_02	59.769	0	-1.546	exonic	Cytoplasmic	lncRNA_intergenic	0.752
892	LINC00707	LINC00707	ASO_G0238266_AD_03	78.763	1	45.348	intronic	Cytoplasmic	lncRNA_intergenic	0.752
893	LINC00707	LINC00707	ASO_G0238266_AD_05	81.404	1	22.807	intronic	Cytoplasmic	lncRNA_intergenic	0.752
894	LINC00707	LINC00707	ASO_G0238266_AD_06	62.059	1	56.132	intronic	Cytoplasmic	lncRNA_intergenic	0.752
895	LINC00707	LINC00707	ASO_G0238266_AD_08	72.563	1	48.977	intronic	Cytoplasmic	lncRNA_intergenic	0.752
896	LINC00847	LINC00847	ASO_G0245060_01	7.357	0	31.694	exonic	Cytoplasmic	lncRNA_divergent	6.643
897	LINC00847	LINC00847	ASO_G0245060_02	25.318	0	46.913	exonic	Cytoplasmic	lncRNA_divergent	6.643
898	LINC00847	LINC00847	ASO_G0245060_03	9.084	0	38.953	exonic	Cytoplasmic	lncRNA_divergent	6.643
899	LINC00847	LINC00847	ASO_G0245060_06	14.5	0	14.864	exonic	Cytoplasmic	lncRNA_divergent	6.643
900	LINC00847	LINC00847	ASO_G0245060_10	6.425	0	29.062	exonic	Cytoplasmic	lncRNA_divergent	6.643
901	LINC00856	LINC00856	ASO_G0230417_01	90.804	1	86.901	exonic	Cytoplasmic	lncRNA_intergenic	1.829
902	LINC00856	LINC00856	ASO_G0230417_02	66.557	1	29.061	exonic	Cytoplasmic	lncRNA_intergenic	1.829
903	LINC00856	LINC00856	ASO_G0230417_04	21.695	0	21.895	exonic	Cytoplasmic	lncRNA_intergenic	1.829
904	LINC00856	LINC00856	ASO_G0230417_05	11.317	0	35.857	exonic	Cytoplasmic	lncRNA_intergenic	1.829
905	LINC00856	LINC00856	ASO_G0230417_07	-1.668	0	53.991	exonic	Cytoplasmic	lncRNA_intergenic	1.829
906	LINC00862	LINC00862	ASO_G0203721_01	52.766	1	24.593	exonic	Chromatin bound	lncRNA_intergenic	0.935
907	LINC00862	LINC00862	ASO_G0203721_02	96.265	1	89.071	exonic	Chromatin bound	lncRNA_intergenic	0.935
908	LINC00862	LINC00862	ASO_G0203721_03	44.318	1	30.015	exonic	Chromatin bound	lncRNA_intergenic	0.935
909	LINC00862	LINC00862	ASO_G0203721_04	66.508	1	58.417	exonic	Chromatin bound	lncRNA_intergenic	0.935
910	LINC00862	LINC00862	ASO_G0203721_05	90.6	1	89.554	exonic	Chromatin bound	lncRNA_intergenic	0.935
911	DUBR	LINC00883	ASO_G0243701_01	98.305	1	94.337	exonic	Cytoplasmic	lncRNA_intergenic	9.372
912	DUBR	LINC00883	ASO_G0243701_02	60.661	1	31.479	exonic	Cytoplasmic	lncRNA_intergenic	9.372
913	DUBR	LINC00883	ASO_G0243701_03	40.425	0	19.761	exonic	Cytoplasmic	lncRNA_intergenic	9.372
914	DUBR	LINC00883	ASO_G0243701_04	66.109	1	25.745	exonic	Cytoplasmic	lncRNA_intergenic	9.372
915	DUBR	LINC00883	ASO_G0243701_05	5.551	0	6.781	exonic	Cytoplasmic	lncRNA_intergenic	9.372
916	DUBR	LINC00883	ASO_G0243701_AD_01	41.835	1	4.252	exonic	Cytoplasmic	lncRNA_intergenic	9.372
917	DUBR	LINC00883	ASO_G0243701_AD_05	38.216	0	27.521	exonic	Cytoplasmic	lncRNA_intergenic	9.372
918	DUBR	LINC00883	ASO_G0243701_AD_07	96.814	1	52.685	exonic	Cytoplasmic	lncRNA_intergenic	9.372
919	DUBR	LINC00883	ASO_G0243701_AD_08	91.401	1	52.493	exonic	Cytoplasmic	lncRNA_intergenic	9.372
920	DUBR	LINC00883	ASO_G0243701_AD_09	12.797	0	59.561	intronic	Cytoplasmic	lncRNA_intergenic	9.372
921	LINC00886	LINC00886	ASO_G0240875_01	67.092	1	70.094	exonic	Chromatin bound	lncRNA_intergenic	4.385
922	LINC00886	LINC00886	ASO_G0240875_02	81.385	1	80.394	exonic	Chromatin bound	lncRNA_intergenic	4.385
923	LINC00886	LINC00886	ASO_G0240875_03	80.046	1	91.626	exonic	Chromatin bound	lncRNA_intergenic	4.385
924	LINC00886	LINC00886	ASO_G0240875_04	50.102	1	66.466	exonic	Chromatin bound	lncRNA_intergenic	4.385
925	LINC00886	LINC00886	ASO_G0240875_10	72.807	1	79.449	exonic	Chromatin bound	lncRNA_intergenic	4.385
926	LINC00899	LINC00899	ASO_G0231711_01	50.283	1	-21.825	exonic	Nuclear soluble	lncRNA_divergent	4.518
927	LINC00899	LINC00899	ASO_G0231711_03	56.825	1	13.283	exonic	Nuclear soluble	lncRNA_divergent	4.518
928	LINC00899	LINC00899	ASO_G0231711_04	57.52	0	39.297	exonic	Nuclear soluble	lncRNA_divergent	4.518
929	LINC00899	LINC00899	ASO_G0231711_05	43.601	0	41.867	exonic	Nuclear soluble	lncRNA_divergent	4.518
930	LINC00899	LINC00899	ASO_G0231711_06	42.697	0	-6.612	exonic	Nuclear soluble	lncRNA_divergent	4.518
931	LINC00909	LINC00909	ASO_G0264247_01	11.388	0	38.491	exonic	Nuclear soluble	lncRNA_divergent	7.303
932	LINC00909	LINC00909	ASO_G0264247_03	18.862	0	11.409	exonic	Nuclear soluble	lncRNA_divergent	7.303
933	LINC00909	LINC00909	ASO_G0264247_04	57.131	0	30.917	exonic	Nuclear soluble	lncRNA_divergent	7.303
934	LINC00909	LINC00909	ASO_G0264247_05	25.379	0	38.759	exonic	Nuclear soluble	lncRNA_divergent	7.303
935	LINC00909	LINC00909	ASO_G0264247_09	30.234	0	24.016	exonic	Nuclear soluble	lncRNA_divergent	7.303
936	LINC00938	LINC00938	ASO_G0273015_01	48.685	1	35.152	exonic	Nuclear soluble	lncRNA_intergenic	9.837
937	LINC00938	LINC00938	ASO_G0273015_02	40.755	0	20.865	exonic	Nuclear soluble	lncRNA_intergenic	9.837
938	LINC00938	LINC00938	ASO_G0273015_03	75.819	1	40.626	exonic	Nuclear soluble	lncRNA_intergenic	9.837
939	LINC00938	LINC00938	ASO_G0273015_04	66.06	1	40.478	exonic	Nuclear soluble	lncRNA_intergenic	9.837
940	LINC00938	LINC00938	ASO_G0273015_05	63.849	1	72.134	exonic	Nuclear soluble	lncRNA_intergenic	9.837
941	LINC00938	LINC00938	ASO_G0273015_AD_04	15.569	0	15.16	exonic	Nuclear soluble	lncRNA_intergenic	9.837
942	LINC00938	LINC00938	ASO_G0273015_AD_05	56.365	1	30.561	exonic	Nuclear soluble	lncRNA_intergenic	9.837
943	LINC00938	LINC00938	ASO_G0273015_AD_07	75.155	1	50.962	exonic	Nuclear soluble	lncRNA_intergenic	9.837
944	LINC00938	LINC00938	ASO_G0273015_AD_08	20.756	0	13.26	exonic	Nuclear soluble	lncRNA_intergenic	9.837
945	LINC00938	LINC00938	ASO_G0273015_AD_10	82.838	1	47.535	exonic	Nuclear soluble	lncRNA_intergenic	9.837
946	LINC00941	LINC00941	ASO_G0235884_01	-22.727	0	13.718	exonic	Cytoplasmic	lncRNA_intergenic	9.03
947	LINC00941	LINC00941	ASO_G0235884_02	-15.035	0	26.871	exonic	Cytoplasmic	lncRNA_intergenic	9.03
948	LINC00941	LINC00941	ASO_G0235884_04	15.934	0	43.77	exonic	Cytoplasmic	lncRNA_intergenic	9.03
949	LINC00941	LINC00941	ASO_G0235884_07	-6.683	0	43.727	exonic	Cytoplasmic	lncRNA_intergenic	9.03
950	LINC00941	LINC00941	ASO_G0235884_08	-65.297	0	26.308	exonic	Cytoplasmic	lncRNA_intergenic	9.03
951	C10orf143	LINC00959	ASO_G0237489_02	55.419	1	41.02	exonic	Chromatin bound	lncRNA_intergenic	5.246
952	C10orf143	LINC00959	ASO_G0237489_03	55.75	1	24.836	exonic	Chromatin bound	lncRNA_intergenic	5.246
953	C10orf143	LINC00959	ASO_G0237489_04	59.214	1	36.44	exonic	Chromatin bound	lncRNA_intergenic	5.246
954	C10orf143	LINC00959	ASO_G0237489_05	52.037	1	22.887	exonic	Chromatin bound	lncRNA_intergenic	5.246
955	C10orf143	LINC00959	ASO_G0237489_09	77.3	1	56.813	exonic	Chromatin bound	lncRNA_intergenic	5.246
956	C10orf143	LINC00959	ASO_G0237489_AD_01	0	1	27.508	intronic	Chromatin bound	lncRNA_intergenic	5.246
957	C10orf143	LINC00959	ASO_G0237489_AD_04	0	0	12.072	intronic	Chromatin bound	lncRNA_intergenic	5.246
958	C10orf143	LINC00959	ASO_G0237489_AD_05	0	1	21.957	exonic	Chromatin bound	lncRNA_intergenic	5.246
959	C10orf143	LINC00959	ASO_G0237489_AD_07	0	1	38.253	intronic	Chromatin bound	lncRNA_intergenic	5.246
960	C10orf143	LINC00959	ASO_G0237489_AD_09	0	1	32.79	intronic	Chromatin bound	lncRNA_intergenic	5.246
961	LINC00963	LINC00963	ASO_G0204054_01	88.776	1	86.694	exonic	Cytoplasmic	lncRNA_intergenic	23.436
962	LINC00963	LINC00963	ASO_G0204054_02	63.607	1	48.07	exonic	Cytoplasmic	lncRNA_intergenic	23.436
963	LINC00963	LINC00963	ASO_G0204054_05	49.245	1	43.366	exonic	Cytoplasmic	lncRNA_intergenic	23.436
964	LINC00963	LINC00963	ASO_G0204054_06	80.9	1	80.562	exonic	Cytoplasmic	lncRNA_intergenic	23.436
965	LINC00963	LINC00963	ASO_G0204054_10	64.777	1	83.318	exonic	Cytoplasmic	lncRNA_intergenic	23.436
966	LINC00968	LINC00968	ASO_G0246430_01	60.209	1	43.233	exonic	Cytoplasmic	lncRNA_divergent	5.287
967	LINC00968	LINC00968	ASO_G0246430_02	60.747	1	37.504	exonic	Cytoplasmic	lncRNA_divergent	5.287
968	LINC00968	LINC00968	ASO_G0246430_03	97.388	1	81.755	exonic	Cytoplasmic	lncRNA_divergent	5.287
969	LINC00968	LINC00968	ASO_G0246430_04	68.723	1	52.032	exonic	Cytoplasmic	lncRNA_divergent	5.287
970	LINC00968	LINC00968	ASO_G0246430_05	39.143	0	30.994	exonic	Cytoplasmic	lncRNA_divergent	5.287
971	LINC00968	LINC00968	ASO_G0246430_AD_03	93.499	1	90.703	intronic	Cytoplasmic	lncRNA_divergent	5.287
972	LINC00968	LINC00968	ASO_G0246430_AD_04	59.336	0	48.75	intronic	Cytoplasmic	lncRNA_divergent	5.287
973	LINC00968	LINC00968	ASO_G0246430_AD_05	38.571	0	11.054	intronic	Cytoplasmic	lncRNA_divergent	5.287
974	LINC00968	LINC00968	ASO_G0246430_AD_08	48.11	1	57.455	intronic	Cytoplasmic	lncRNA_divergent	5.287
975	LINC00968	LINC00968	ASO_G0246430_AD_10	24.256	0	45.182	intronic	Cytoplasmic	lncRNA_divergent	5.287
976	LINC01023	LINC01023	ASO_G0272523_01	19.557	0	61.019	exonic	Nuclear soluble	lncRNA_intergenic	3.754
977	LINC01023	LINC01023	ASO_G0272523_06	35.162	0	5.209	exonic	Nuclear soluble	lncRNA_intergenic	3.754
978	LINC01023	LINC01023	ASO_G0272523_08	16.739	0	39.143	exonic	Nuclear soluble	lncRNA_intergenic	3.754
979	LINC01023	LINC01023	ASO_G0272523_09	45.576	0	3.329	exonic	Nuclear soluble	lncRNA_intergenic	3.754
980	LINC01023	LINC01023	ASO_G0272523_10	36.452	0	38.258	exonic	Nuclear soluble	lncRNA_intergenic	3.754
981	LINC01085	LINC01085	ASO_G0248698_01	32.072	0	37.758	exonic	Cytoplasmic	lncRNA_intergenic	8.364
982	LINC01085	LINC01085	ASO_G0248698_04	22.915	0	38.481	exonic	Cytoplasmic	lncRNA_intergenic	8.364
983	LINC01085	LINC01085	ASO_G0248698_05	74.618	1	52.499	exonic	Cytoplasmic	lncRNA_intergenic	8.364
984	LINC01085	LINC01085	ASO_G0248698_07	11.27	0	35.805	exonic	Cytoplasmic	lncRNA_intergenic	8.364
985	LINC01085	LINC01085	ASO_G0248698_08	8.082	0	28.425	exonic	Cytoplasmic	lncRNA_intergenic	8.364
986	PPM1F-AS1	LL22NC03-86G7.1	ASO_G0224086_03	27.486	0	70.916	exonic	Cytoplasmic	lncRNA_divergent	3.682
987	PPM1F-AS1	LL22NC03-86G7.1	ASO_G0224086_04	34.208	0	83.592	exonic	Cytoplasmic	lncRNA_divergent	3.682
988	PPM1F-AS1	LL22NC03-86G7.1	ASO_G0224086_05	28.416	0	41.381	exonic	Cytoplasmic	lncRNA_divergent	3.682
989	PPM1F-AS1	LL22NC03-86G7.1	ASO_G0224086_06	69.669	1	67.665	exonic	Cytoplasmic	lncRNA_divergent	3.682
990	PPM1F-AS1	LL22NC03-86G7.1	ASO_G0224086_09	79.707	1	36.168	exonic	Cytoplasmic	lncRNA_divergent	3.682
991	LOXL1-AS1	LOXL1-AS1	ASO_G0261801_01	0	0	0	exonic	Cytoplasmic	lncRNA_divergent	25.143
992	LOXL1-AS1	LOXL1-AS1	ASO_G0261801_02	0	1	23.01	exonic	Cytoplasmic	lncRNA_divergent	25.143
993	LOXL1-AS1	LOXL1-AS1	ASO_G0261801_04	0	1	0	exonic	Cytoplasmic	lncRNA_divergent	25.143
994	LOXL1-AS1	LOXL1-AS1	ASO_G0261801_07	0	0	47.816	exonic	Cytoplasmic	lncRNA_divergent	25.143
995	MAGI2-AS3	MAGI2-AS3	ASO_G0234456_01	70.313	1	56.962	exonic	Chromatin bound	lncRNA_divergent	85.791
996	MAGI2-AS3	MAGI2-AS3	ASO_G0234456_02	14.457	0	21.565	exonic	Chromatin bound	lncRNA_divergent	85.791
997	MAGI2-AS3	MAGI2-AS3	ASO_G0234456_03	27.35	0	27.734	exonic	Chromatin bound	lncRNA_divergent	85.791
998	MAGI2-AS3	MAGI2-AS3	ASO_G0234456_04	93.647	1	91.44	exonic	Chromatin bound	lncRNA_divergent	85.791
999	MAGI2-AS3	MAGI2-AS3	ASO_G0234456_06	64.637	1	33.136	exonic	Chromatin bound	lncRNA_divergent	85.791
1000	MAPKAPK5-AS1	MAPKAPK5-AS1	ASO_G0234608_03	55.888	1	50.647	exonic	Cytoplasmic	lncRNA_divergent	10.237
1001	MAPKAPK5-AS1	MAPKAPK5-AS1	ASO_G0234608_05	49.564	0	48.291	exonic	Cytoplasmic	lncRNA_divergent	10.237
1002	MAPKAPK5-AS1	MAPKAPK5-AS1	ASO_G0234608_06	80.455	1	69.46	exonic	Cytoplasmic	lncRNA_divergent	10.237
1003	MAPKAPK5-AS1	MAPKAPK5-AS1	ASO_G0234608_07	31.732	0	28.86	exonic	Cytoplasmic	lncRNA_divergent	10.237
1004	MAPKAPK5-AS1	MAPKAPK5-AS1	ASO_G0234608_09	56.905	1	21.429	exonic	Cytoplasmic	lncRNA_divergent	10.237
1005	MAPKAPK5-AS1	MAPKAPK5-AS1	ASO_G0234608_AD_01	80.974	1	58.444	exonic	Cytoplasmic	lncRNA_divergent	10.237
1006	MAPKAPK5-AS1	MAPKAPK5-AS1	ASO_G0234608_AD_04	95.666	1	82.069	exonic	Cytoplasmic	lncRNA_divergent	10.237
1007	MAPKAPK5-AS1	MAPKAPK5-AS1	ASO_G0234608_AD_05	3.64	0	12.851	exonic	Cytoplasmic	lncRNA_divergent	10.237
1008	MAPKAPK5-AS1	MAPKAPK5-AS1	ASO_G0234608_AD_08	74.548	1	37.887	exonic	Cytoplasmic	lncRNA_divergent	10.237
1009	MAPKAPK5-AS1	MAPKAPK5-AS1	ASO_G0234608_AD_09	35.006	0	19.765	exonic	Cytoplasmic	lncRNA_divergent	10.237
1010	MEG3	MEG3	ASO_G0214548_01	98.736	1	96.757	exonic	Chromatin bound	lncRNA_intergenic	117.654
1011	MEG3	MEG3	ASO_G0214548_03	-14.107	0	16.884	exonic	Chromatin bound	lncRNA_intergenic	117.654
1012	MEG3	MEG3	ASO_G0214548_04	26.463	0	38.114	exonic	Chromatin bound	lncRNA_intergenic	117.654
1013	MEG3	MEG3	ASO_G0214548_05	-21.077	0	44.488	exonic	Chromatin bound	lncRNA_intergenic	117.654
1014	MEG3	MEG3	ASO_G0214548_06	-12.34	0	23.292	exonic	Chromatin bound	lncRNA_intergenic	117.654
1015	MEG3	MEG3	ASO_G0214548_AD_06	94.496	1	85.303	exonic	Chromatin bound	lncRNA_intergenic	117.654
1016	MEG3	MEG3	ASO_G0214548_AD_07	23.762	0	-0.889	exonic	Chromatin bound	lncRNA_intergenic	117.654
1017	MEG3	MEG3	ASO_G0214548_AD_08	59.389	1	24.544	exonic	Chromatin bound	lncRNA_intergenic	117.654
1018	MEG3	MEG3	ASO_G0214548_AD_09	98.087	1	86.235	exonic	Chromatin bound	lncRNA_intergenic	117.654
1019	MEG3	MEG3	ASO_G0214548_AD_10	44.901	0	7.875	intronic	Chromatin bound	lncRNA_intergenic	117.654
1020	MELTF-AS1	MFI2-AS1	ASO_G0228109_01	55.951	1	15.301	exonic	Nuclear soluble	lncRNA_divergent	2.447
1021	MELTF-AS1	MFI2-AS1	ASO_G0228109_02	36.017	0	13.217	exonic	Nuclear soluble	lncRNA_divergent	2.447
1022	MELTF-AS1	MFI2-AS1	ASO_G0228109_06	92.151	1	93.969	exonic	Nuclear soluble	lncRNA_divergent	2.447
1023	MELTF-AS1	MFI2-AS1	ASO_G0228109_07	56.822	0	70.138	exonic	Nuclear soluble	lncRNA_divergent	2.447
1024	MELTF-AS1	MFI2-AS1	ASO_G0228109_09	31.67	0	12.593	exonic	Nuclear soluble	lncRNA_divergent	2.447
1025	MIPEPP3	MIPEPP3	ASO_G0233325_01	30.545	0	49.375	exonic	Cytoplasmic	pseudogene	4.613
1026	MIPEPP3	MIPEPP3	ASO_G0233325_02	-7.887	0	20.958	exonic	Cytoplasmic	pseudogene	4.613
1027	MIPEPP3	MIPEPP3	ASO_G0233325_05	18.348	0	1.361	exonic	Cytoplasmic	pseudogene	4.613
1028	MIPEPP3	MIPEPP3	ASO_G0233325_07	9.873	0	-19.992	exonic	Cytoplasmic	pseudogene	4.613
1029	MIPEPP3	MIPEPP3	ASO_G0233325_08	12.755	0	36.933	exonic	Cytoplasmic	pseudogene	4.613
1030	MKLN1-AS	MKLN1-AS2	ASO_G0236753_01	31.655	0	-1.043	exonic	Cytoplasmic	lncRNA_divergent	2.426
1031	MKLN1-AS	MKLN1-AS2	ASO_G0236753_02	4.2	0	18.703	exonic	Cytoplasmic	lncRNA_divergent	2.426
1032	MKLN1-AS	MKLN1-AS2	ASO_G0236753_03	91.915	1	72.726	exonic	Cytoplasmic	lncRNA_divergent	2.426
1033	MKLN1-AS	MKLN1-AS2	ASO_G0236753_05	44.905	0	7.21	exonic	Cytoplasmic	lncRNA_divergent	2.426
1034	MKLN1-AS	MKLN1-AS2	ASO_G0236753_06	47.811	1	19.455	exonic	Cytoplasmic	lncRNA_divergent	2.426
1035	MKLN1-AS	MKLN1-AS2	ASO_G0236753_AD_01	89.835	1	69.169	exonic	Cytoplasmic	lncRNA_divergent	2.426
1036	MKLN1-AS	MKLN1-AS2	ASO_G0236753_AD_02	19.116	0	3.648	intronic	Cytoplasmic	lncRNA_divergent	2.426
1037	MKLN1-AS	MKLN1-AS2	ASO_G0236753_AD_05	33.624	0	1.731	exonic	Cytoplasmic	lncRNA_divergent	2.426
1038	MKLN1-AS	MKLN1-AS2	ASO_G0236753_AD_07	81.068	1	40.002	exonic	Cytoplasmic	lncRNA_divergent	2.426
1039	MKLN1-AS	MKLN1-AS2	ASO_G0236753_AD_08	68.612	1	28.093	exonic	Cytoplasmic	lncRNA_divergent	2.426
1040	MRPS31P5	MRPS31P5	ASO_G0243406_02	0	0	31.121	exonic	Nuclear soluble	pseudogene	5.478
1041	MRPS31P5	MRPS31P5	ASO_G0243406_05	0	0	19.288	exonic	Nuclear soluble	pseudogene	5.478
1042	MRPS31P5	MRPS31P5	ASO_G0243406_07	0	0	28.289	exonic	Nuclear soluble	pseudogene	5.478
1043	MRPS31P5	MRPS31P5	ASO_G0243406_08	0	0	30.515	exonic	Nuclear soluble	pseudogene	5.478
1044	MRPS31P5	MRPS31P5	ASO_G0243406_10	0	0	19.987	exonic	Nuclear soluble	pseudogene	5.478
1045	NBR2	NBR2	ASO_G0198496_01	73.488	1	49.532	exonic	Chromatin bound	pseudogene	6.819
1046	NBR2	NBR2	ASO_G0198496_03	46.666	1	29.618	exonic	Chromatin bound	pseudogene	6.819
1047	NBR2	NBR2	ASO_G0198496_04	25.354	0	28.826	exonic	Chromatin bound	pseudogene	6.819
1048	NBR2	NBR2	ASO_G0198496_05	46.139	0	12.514	exonic	Chromatin bound	pseudogene	6.819
1049	NBR2	NBR2	ASO_G0198496_09	46.384	0	37.896	exonic	Chromatin bound	pseudogene	6.819
1050	NNT-AS1	NNT-AS1	ASO_G0248092_01	91.466	1	59.143	exonic	Cytoplasmic	lncRNA_divergent	8.717
1051	NNT-AS1	NNT-AS1	ASO_G0248092_02	57.647	1	31.808	exonic	Cytoplasmic	lncRNA_divergent	8.717
1052	NNT-AS1	NNT-AS1	ASO_G0248092_06	65.59	1	24.169	exonic	Cytoplasmic	lncRNA_divergent	8.717
1053	NNT-AS1	NNT-AS1	ASO_G0248092_07	64.294	1	42.844	exonic	Cytoplasmic	lncRNA_divergent	8.717
1054	NNT-AS1	NNT-AS1	ASO_G0248092_09	73.326	1	27.438	exonic	Cytoplasmic	lncRNA_divergent	8.717
1055	NNT-AS1	NNT-AS1	ASO_G0248092_AD_01	69.715	1	23.873	intronic	Cytoplasmic	lncRNA_divergent	8.717
1056	NNT-AS1	NNT-AS1	ASO_G0248092_AD_04	55.016	1	-7.4384e+06	exonic	Cytoplasmic	lncRNA_divergent	8.717
1057	NNT-AS1	NNT-AS1	ASO_G0248092_AD_05	40.346	0	-0.734	exonic	Cytoplasmic	lncRNA_divergent	8.717
1058	NNT-AS1	NNT-AS1	ASO_G0248092_AD_09	65.517	1	-1341.9	intronic	Cytoplasmic	lncRNA_divergent	8.717
1059	NNT-AS1	NNT-AS1	ASO_G0248092_AD_10	68.572	1	65.613	exonic	Cytoplasmic	lncRNA_divergent	8.717
1060	NOP14-AS1	NOP14-AS1	ASO_G0249673_01	80.43	1	42.042	exonic	Cytoplasmic	lncRNA_divergent	4.668
1061	NOP14-AS1	NOP14-AS1	ASO_G0249673_02	31.939	0	20.251	exonic	Cytoplasmic	lncRNA_divergent	4.668
1062	NOP14-AS1	NOP14-AS1	ASO_G0249673_04	7.716	0	-1.388	exonic	Cytoplasmic	lncRNA_divergent	4.668
1063	NOP14-AS1	NOP14-AS1	ASO_G0249673_06	29.332	0	11.975	exonic	Cytoplasmic	lncRNA_divergent	4.668
1064	NOP14-AS1	NOP14-AS1	ASO_G0249673_08	76.106	1	53.072	exonic	Cytoplasmic	lncRNA_divergent	4.668
1065	NR2F1-AS1	NR2F1-AS1	ASO_G0237187_01	81.815	1	51.653	exonic	Chromatin bound	lncRNA_divergent	28.299
1066	NR2F1-AS1	NR2F1-AS1	ASO_G0237187_03	89.899	1	70.374	exonic	Chromatin bound	lncRNA_divergent	28.299
1067	NR2F1-AS1	NR2F1-AS1	ASO_G0237187_05	43.278	0	27.793	exonic	Chromatin bound	lncRNA_divergent	28.299
1068	NR2F1-AS1	NR2F1-AS1	ASO_G0237187_06	52.479	0	1.767	exonic	Chromatin bound	lncRNA_divergent	28.299
1069	NR2F1-AS1	NR2F1-AS1	ASO_G0237187_08	36.182	0	47.353	exonic	Chromatin bound	lncRNA_divergent	28.299
1070	NR2F1-AS1	NR2F1-AS1	ASO_G0237187_AD_01	86.97	1	66.93	intronic	Chromatin bound	lncRNA_divergent	28.299
1071	NR2F1-AS1	NR2F1-AS1	ASO_G0237187_AD_03	75.234	1	27.705	intronic	Chromatin bound	lncRNA_divergent	28.299
1072	NR2F1-AS1	NR2F1-AS1	ASO_G0237187_AD_05	61.388	1	28.407	exonic	Chromatin bound	lncRNA_divergent	28.299
1073	NR2F1-AS1	NR2F1-AS1	ASO_G0237187_AD_07	69.213	1	33.514	exonic	Chromatin bound	lncRNA_divergent	28.299
1074	NR2F1-AS1	NR2F1-AS1	ASO_G0237187_AD_08	34.062	0	12.592	exonic	Chromatin bound	lncRNA_divergent	28.299
1075	OIP5-AS1	OIP5-AS1	ASO_G0247556_01	55.537	1	29.362	exonic	Nuclear soluble	lncRNA_sense_intronic	68.411
1076	OIP5-AS1	OIP5-AS1	ASO_G0247556_03	54.686	1	30.329	exonic	Nuclear soluble	lncRNA_sense_intronic	68.411
1077	OIP5-AS1	OIP5-AS1	ASO_G0247556_04	76.657	1	51.634	exonic	Nuclear soluble	lncRNA_sense_intronic	68.411
1078	OIP5-AS1	OIP5-AS1	ASO_G0247556_05	66.971	1	39.791	exonic	Nuclear soluble	lncRNA_sense_intronic	68.411
1079	OIP5-AS1	OIP5-AS1	ASO_G0247556_09	47.134	0	28.615	exonic	Nuclear soluble	lncRNA_sense_intronic	68.411
1080	OSER1-DT	OSER1-AS1	ASO_G0223891_01	34.712	0	45.834	exonic	Nuclear soluble	lncRNA_divergent	3.824
1081	OSER1-DT	OSER1-AS1	ASO_G0223891_02	27.948	0	56.894	exonic	Nuclear soluble	lncRNA_divergent	3.824
1082	OSER1-DT	OSER1-AS1	ASO_G0223891_03	32.159	0	48.105	exonic	Nuclear soluble	lncRNA_divergent	3.824
1083	OSER1-DT	OSER1-AS1	ASO_G0223891_08	42.094	0	41.362	exonic	Nuclear soluble	lncRNA_divergent	3.824
1084	OSER1-DT	OSER1-AS1	ASO_G0223891_09	41.097	0	37.918	exonic	Nuclear soluble	lncRNA_divergent	3.824
1085	PCAT6	PCAT6	ASO_G0228288_01	76.779	1	68.483	exonic	Nuclear soluble	lncRNA_intergenic	2.586
1086	PCAT6	PCAT6	ASO_G0228288_02	51.984	0	7.753	exonic	Nuclear soluble	lncRNA_intergenic	2.586
1087	PCAT6	PCAT6	ASO_G0228288_04	44.136	0	6.431	exonic	Nuclear soluble	lncRNA_intergenic	2.586
1088	PCAT6	PCAT6	ASO_G0228288_05	49.238	1	20.333	exonic	Nuclear soluble	lncRNA_intergenic	2.586
1089	PCAT6	PCAT6	ASO_G0228288_09	45.485	0	50.961	exonic	Nuclear soluble	lncRNA_intergenic	2.586
1090	PCAT6	PCAT6	ASO_G0228288_AD_01	80.592	1	59.079	exonic	Nuclear soluble	lncRNA_intergenic	2.586
1091	PCAT6	PCAT6	ASO_G0228288_AD_02	48.432	1	30.138	exonic	Nuclear soluble	lncRNA_intergenic	2.586
1092	PCAT6	PCAT6	ASO_G0228288_AD_04	8.854	0	52.173	exonic	Nuclear soluble	lncRNA_intergenic	2.586
1093	PCAT6	PCAT6	ASO_G0228288_AD_07	58.026	1	64.344	exonic	Nuclear soluble	lncRNA_intergenic	2.586
1094	PCAT6	PCAT6	ASO_G0228288_AD_10	77.131	1	50.984	exonic	Nuclear soluble	lncRNA_intergenic	2.586
1095	PITPNA-AS1	PITPNA-AS1	ASO_G0236618_03	49.008	1	0.336	exonic	Cytoplasmic	lncRNA_divergent	20.885
1096	PITPNA-AS1	PITPNA-AS1	ASO_G0236618_05	1.442	0	50.681	exonic	Cytoplasmic	lncRNA_divergent	20.885
1097	PITPNA-AS1	PITPNA-AS1	ASO_G0236618_06	-22.971	0	-9.587	exonic	Cytoplasmic	lncRNA_divergent	20.885
1098	PITPNA-AS1	PITPNA-AS1	ASO_G0236618_07	42.056	0	58.395	exonic	Cytoplasmic	lncRNA_divergent	20.885
1099	PITPNA-AS1	PITPNA-AS1	ASO_G0236618_09	38.005	0	-3.857	exonic	Cytoplasmic	lncRNA_divergent	20.885
1100	PITPNA-AS1	PITPNA-AS1	ASO_G0236618_AD_01	20.159	0	33.116	intronic	Cytoplasmic	lncRNA_divergent	20.885
1101	PITPNA-AS1	PITPNA-AS1	ASO_G0236618_AD_03	-12.539	0	23.655	exonic	Cytoplasmic	lncRNA_divergent	20.885
1102	PITPNA-AS1	PITPNA-AS1	ASO_G0236618_AD_05	16.94	0	26.72	intronic	Cytoplasmic	lncRNA_divergent	20.885
1103	PITPNA-AS1	PITPNA-AS1	ASO_G0236618_AD_07	68.398	1	51.43	exonic	Cytoplasmic	lncRNA_divergent	20.885
1104	PITPNA-AS1	PITPNA-AS1	ASO_G0236618_AD_09	55.444	1	61.659	intronic	Cytoplasmic	lncRNA_divergent	20.885
1105	PRRT3-AS1	PRRT3-AS1	ASO_G0230082_01	65.067	1	78.781	exonic	Chromatin bound	lncRNA_divergent	3.024
1106	PRRT3-AS1	PRRT3-AS1	ASO_G0230082_03	-2.968	0	-5.402	exonic	Chromatin bound	lncRNA_divergent	3.024
1107	PRRT3-AS1	PRRT3-AS1	ASO_G0230082_04	28.492	0	48.126	exonic	Chromatin bound	lncRNA_divergent	3.024
1108	PRRT3-AS1	PRRT3-AS1	ASO_G0230082_05	28.522	0	20.158	exonic	Chromatin bound	lncRNA_divergent	3.024
1109	PRRT3-AS1	PRRT3-AS1	ASO_G0230082_06	39.535	0	39.361	exonic	Chromatin bound	lncRNA_divergent	3.024
1110	PRRT3-AS1	PRRT3-AS1	ASO_G0230082_AD_01	78.636	1	60.75	exonic	Chromatin bound	lncRNA_divergent	3.024
1111	PRRT3-AS1	PRRT3-AS1	ASO_G0230082_AD_03	84.035	1	34.709	intronic	Chromatin bound	lncRNA_divergent	3.024
1112	PRRT3-AS1	PRRT3-AS1	ASO_G0230082_AD_08	34.769	0	35.101	exonic	Chromatin bound	lncRNA_divergent	3.024
1113	PRRT3-AS1	PRRT3-AS1	ASO_G0230082_AD_09	62.31	1	48.623	exonic	Chromatin bound	lncRNA_divergent	3.024
1114	PRRT3-AS1	PRRT3-AS1	ASO_G0230082_AD_10	43.075	0	21.998	exonic	Chromatin bound	lncRNA_divergent	3.024
1115	PSMG3-AS1	PSMG3-AS1	ASO_G0230487_01	29.993	0	11.436	exonic	Nuclear soluble	lncRNA_divergent	7.019
1116	PSMG3-AS1	PSMG3-AS1	ASO_G0230487_02	27.562	0	11.323	exonic	Nuclear soluble	lncRNA_divergent	7.019
1117	PSMG3-AS1	PSMG3-AS1	ASO_G0230487_03	16.989	0	20.967	exonic	Nuclear soluble	lncRNA_divergent	7.019
1118	PSMG3-AS1	PSMG3-AS1	ASO_G0230487_04	39.455	0	17.311	exonic	Nuclear soluble	lncRNA_divergent	7.019
1119	PSMG3-AS1	PSMG3-AS1	ASO_G0230487_05	23.899	0	3.932	exonic	Nuclear soluble	lncRNA_divergent	7.019
1120	PTCHD3P1	PTCHD3P1	ASO_G0224597_01	21.242	0	9.396	exonic	Cytoplasmic	lncRNA_intergenic	79.377
1121	PTCHD3P1	PTCHD3P1	ASO_G0224597_02	47.575	0	34.115	exonic	Cytoplasmic	lncRNA_intergenic	79.377
1122	PTCHD3P1	PTCHD3P1	ASO_G0224597_03	12.874	0	33.152	exonic	Cytoplasmic	lncRNA_intergenic	79.377
1123	PTCHD3P1	PTCHD3P1	ASO_G0224597_05	94.371	1	93.914	exonic	Cytoplasmic	lncRNA_intergenic	79.377
1124	PTCHD3P1	PTCHD3P1	ASO_G0224597_06	79.892	1	66.338	exonic	Cytoplasmic	lncRNA_intergenic	79.377
1125	PTCHD3P1	PTCHD3P1	ASO_G0224597_AD_01	56.958	1	8.097	intronic	Cytoplasmic	lncRNA_intergenic	79.377
1126	PTCHD3P1	PTCHD3P1	ASO_G0224597_AD_02	53.779	0	10.618	exonic	Cytoplasmic	lncRNA_intergenic	79.377
1127	PTCHD3P1	PTCHD3P1	ASO_G0224597_AD_03	27.781	0	-4.421	exonic	Cytoplasmic	lncRNA_intergenic	79.377
1128	PTCHD3P1	PTCHD3P1	ASO_G0224597_AD_04	95.952	1	74.536	exonic	Cytoplasmic	lncRNA_intergenic	79.377
1129	PTCHD3P1	PTCHD3P1	ASO_G0224597_AD_07	67.963	1	28.848	exonic	Cytoplasmic	lncRNA_intergenic	79.377
1130	PTPRG-AS1	PTPRG-AS1	ASO_G0241472_02	69.109	1	28.41	exonic	Cytoplasmic	lncRNA_divergent	2.533
1131	PTPRG-AS1	PTPRG-AS1	ASO_G0241472_04	72.459	1	29.952	exonic	Cytoplasmic	lncRNA_divergent	2.533
1132	PTPRG-AS1	PTPRG-AS1	ASO_G0241472_05	54.123	0	16.327	exonic	Cytoplasmic	lncRNA_divergent	2.533
1133	PTPRG-AS1	PTPRG-AS1	ASO_G0241472_07	79.768	1	29.29	exonic	Cytoplasmic	lncRNA_divergent	2.533
1134	PTPRG-AS1	PTPRG-AS1	ASO_G0241472_10	44.17	1	57.399	exonic	Cytoplasmic	lncRNA_divergent	2.533
1135	PXN-AS1	PXN-AS1	ASO_G0255857_01	35.727	0	25.378	exonic	Nuclear soluble	lncRNA_divergent	6.013
1136	PXN-AS1	PXN-AS1	ASO_G0255857_02	78.647	1	53.994	exonic	Nuclear soluble	lncRNA_divergent	6.013
1137	PXN-AS1	PXN-AS1	ASO_G0255857_04	-2.549	0	39.712	exonic	Nuclear soluble	lncRNA_divergent	6.013
1138	PXN-AS1	PXN-AS1	ASO_G0255857_06	10.624	0	40.125	exonic	Nuclear soluble	lncRNA_divergent	6.013
1139	PXN-AS1	PXN-AS1	ASO_G0255857_09	19.229	0	38.372	exonic	Nuclear soluble	lncRNA_divergent	6.013
1140	RAB30-DT	RAB30-AS1	ASO_G0246067_01	71.977	1	83.156	exonic	Nuclear soluble	lncRNA_divergent	32.449
1141	RAB30-DT	RAB30-AS1	ASO_G0246067_02	44.938	0	35.502	exonic	Nuclear soluble	lncRNA_divergent	32.449
1142	RAB30-DT	RAB30-AS1	ASO_G0246067_03	38.928	0	23.882	exonic	Nuclear soluble	lncRNA_divergent	32.449
1143	RAB30-DT	RAB30-AS1	ASO_G0246067_04	25.701	0	29.069	exonic	Nuclear soluble	lncRNA_divergent	32.449
1144	RAB30-DT	RAB30-AS1	ASO_G0246067_05	71.068	1	58.759	exonic	Nuclear soluble	lncRNA_divergent	32.449
1145	RAB30-DT	RAB30-AS1	ASO_G0246067_AD_03	53.249	1	14.387	exonic	Nuclear soluble	lncRNA_divergent	32.449
1146	RAB30-DT	RAB30-AS1	ASO_G0246067_AD_04	93.722	1	87.164	exonic	Nuclear soluble	lncRNA_divergent	32.449
1147	RAB30-DT	RAB30-AS1	ASO_G0246067_AD_06	0	1	93.061	exonic	Nuclear soluble	lncRNA_divergent	32.449
1148	RAB30-DT	RAB30-AS1	ASO_G0246067_AD_09	96.497	1	87.123	exonic	Nuclear soluble	lncRNA_divergent	32.449
1149	RAB30-DT	RAB30-AS1	ASO_G0246067_AD_10	52.36	0	42.509	exonic	Nuclear soluble	lncRNA_divergent	32.449
1150	RAD51-AS1	RAD51-AS1	ASO_G0245849_01	67.906	1	65.391	exonic	Chromatin bound	lncRNA_divergent	3.728
1151	RAD51-AS1	RAD51-AS1	ASO_G0245849_02	43.744	1	31.967	exonic	Chromatin bound	lncRNA_divergent	3.728
1152	RAD51-AS1	RAD51-AS1	ASO_G0245849_05	31.19	0	12.302	exonic	Chromatin bound	lncRNA_divergent	3.728
1153	RAD51-AS1	RAD51-AS1	ASO_G0245849_06	54.444	1	14.056	exonic	Chromatin bound	lncRNA_divergent	3.728
1154	RAD51-AS1	RAD51-AS1	ASO_G0245849_07	44.053	0	23.966	exonic	Chromatin bound	lncRNA_divergent	3.728
1155	RAD51-AS1	RAD51-AS1	ASO_G0245849_AD_03	38.332	0	25.695	exonic	Chromatin bound	lncRNA_divergent	3.728
1156	RAD51-AS1	RAD51-AS1	ASO_G0245849_AD_05	57.671	0	-5.29	exonic	Chromatin bound	lncRNA_divergent	3.728
1157	RAD51-AS1	RAD51-AS1	ASO_G0245849_AD_06	48.299	0	12.954	exonic	Chromatin bound	lncRNA_divergent	3.728
1158	RAD51-AS1	RAD51-AS1	ASO_G0245849_AD_07	85.359	1	71.976	exonic	Chromatin bound	lncRNA_divergent	3.728
1159	RAD51-AS1	RAD51-AS1	ASO_G0245849_AD_09	60.188	1	16.125	exonic	Chromatin bound	lncRNA_divergent	3.728
1160	RASSF8-AS1	RASSF8-AS1	ASO_G0246695_01	47.964	1	11.551	exonic	Nuclear soluble	lncRNA_divergent	9.492
1161	RASSF8-AS1	RASSF8-AS1	ASO_G0246695_02	13.34	0	24.801	exonic	Nuclear soluble	lncRNA_divergent	9.492
1162	RASSF8-AS1	RASSF8-AS1	ASO_G0246695_04	53.526	1	51.819	exonic	Nuclear soluble	lncRNA_divergent	9.492
1163	RASSF8-AS1	RASSF8-AS1	ASO_G0246695_06	-29.813	0	36.898	exonic	Nuclear soluble	lncRNA_divergent	9.492
1164	RASSF8-AS1	RASSF8-AS1	ASO_G0246695_07	17.063	0	40.87	exonic	Nuclear soluble	lncRNA_divergent	9.492
1165	RP1-152L7.5	RP1-152L7.5	ASO_G0216775_01	84.138	1	54.766	exonic	Nuclear soluble	pseudogene	7.669
1166	RP1-152L7.5	RP1-152L7.5	ASO_G0216775_02	80.1	1	26.03	exonic	Nuclear soluble	pseudogene	7.669
1167	RP1-152L7.5	RP1-152L7.5	ASO_G0216775_03	67.429	1	56.574	exonic	Nuclear soluble	pseudogene	7.669
1168	RP1-152L7.5	RP1-152L7.5	ASO_G0216775_05	84.28	1	36.767	exonic	Nuclear soluble	pseudogene	7.669
1169	RP1-152L7.5	RP1-152L7.5	ASO_G0216775_07	82.797	1	5.351	exonic	Nuclear soluble	pseudogene	7.669
1170	ERICH6-AS1	RP11-103G8.2	ASO_G0240137_01	38.318	0	19.068	exonic	Nuclear soluble	lncRNA_divergent	2.582
1171	ERICH6-AS1	RP11-103G8.2	ASO_G0240137_04	59.201	1	39.534	exonic	Nuclear soluble	lncRNA_divergent	2.582
1172	ERICH6-AS1	RP11-103G8.2	ASO_G0240137_05	45.765	0	32.496	exonic	Nuclear soluble	lncRNA_divergent	2.582
1173	ERICH6-AS1	RP11-103G8.2	ASO_G0240137_06	19.68	0	21.549	exonic	Nuclear soluble	lncRNA_divergent	2.582
1174	ERICH6-AS1	RP11-103G8.2	ASO_G0240137_09	61.003	1	37.055	exonic	Nuclear soluble	lncRNA_divergent	2.582
1175	RP11-10K16.1	RP11-10K16.1	ASO_G0245213_01	67.394	1	49.869	exonic	Chromatin bound	lncRNA_divergent	1.692
1176	RP11-10K16.1	RP11-10K16.1	ASO_G0245213_03	56.89	0	55.312	exonic	Chromatin bound	lncRNA_divergent	1.692
1177	RP11-10K16.1	RP11-10K16.1	ASO_G0245213_04	79.359	1	52.851	exonic	Chromatin bound	lncRNA_divergent	1.692
1178	RP11-10K16.1	RP11-10K16.1	ASO_G0245213_06	36.464	0	10.63	exonic	Chromatin bound	lncRNA_divergent	1.692
1179	RP11-10K16.1	RP11-10K16.1	ASO_G0245213_AD_02	13.402	0	21.046	exonic	Chromatin bound	lncRNA_divergent	1.692
1180	RP11-10K16.1	RP11-10K16.1	ASO_G0245213_AD_03	28.309	0	34.687	exonic	Chromatin bound	lncRNA_divergent	1.692
1181	RP11-10K16.1	RP11-10K16.1	ASO_G0245213_AD_04	97.302	1	83.239	exonic	Chromatin bound	lncRNA_divergent	1.692
1182	RP11-10K16.1	RP11-10K16.1	ASO_G0245213_AD_05	47.882	0	-2.156	exonic	Chromatin bound	lncRNA_divergent	1.692
1183	RP11-10K16.1	RP11-10K16.1	ASO_G0245213_AD_10	81.74	1	45.21	exonic	Chromatin bound	lncRNA_divergent	1.692
1184	RP11-110G21.1	RP11-110G21.1	ASO_G0228801_01	57.171	1	57.268	exonic	Nuclear soluble	lncRNA_divergent	3.177
1185	RP11-110G21.1	RP11-110G21.1	ASO_G0228801_02	42.059	1	33.371	exonic	Nuclear soluble	lncRNA_divergent	3.177
1186	RP11-110G21.1	RP11-110G21.1	ASO_G0228801_03	15.222	0	42.219	exonic	Nuclear soluble	lncRNA_divergent	3.177
1187	RP11-110G21.1	RP11-110G21.1	ASO_G0228801_07	-8.111	0	34.659	exonic	Nuclear soluble	lncRNA_divergent	3.177
1188	RP11-110G21.1	RP11-110G21.1	ASO_G0228801_08	16.314	0	42.486	exonic	Nuclear soluble	lncRNA_divergent	3.177
1189	CCDC84-DT	RP11-110I1.12	ASO_G0255121_01	55.873	0	28.96	exonic	Cytoplasmic	lncRNA_divergent	7.459
1190	CCDC84-DT	RP11-110I1.12	ASO_G0255121_02	84.194	1	67.973	exonic	Cytoplasmic	lncRNA_divergent	7.459
1191	CCDC84-DT	RP11-110I1.12	ASO_G0255121_03	43.934	0	46.782	exonic	Cytoplasmic	lncRNA_divergent	7.459
1192	CCDC84-DT	RP11-110I1.12	ASO_G0255121_04	30.91	0	27.873	exonic	Cytoplasmic	lncRNA_divergent	7.459
1193	CCDC84-DT	RP11-110I1.12	ASO_G0255121_08	66.31	0	56.593	exonic	Cytoplasmic	lncRNA_divergent	7.459
1194	RP11-111M22.3	RP11-111M22.3	ASO_G0255135_03	32.432	0	35.517	exonic	Nuclear soluble	lncRNA_divergent	7.164
1195	RP11-111M22.3	RP11-111M22.3	ASO_G0255135_04	19.45	0	46.008	exonic	Nuclear soluble	lncRNA_divergent	7.164
1196	RP11-111M22.3	RP11-111M22.3	ASO_G0255135_08	26.749	0	22.106	exonic	Nuclear soluble	lncRNA_divergent	7.164
1197	RP11-115C21.2	RP11-115C21.2	ASO_G0246089_01	47.787	0	36.915	exonic	Nuclear soluble	lncRNA_divergent	3.636
1198	RP11-115C21.2	RP11-115C21.2	ASO_G0246089_02	61.445	1	65.443	exonic	Nuclear soluble	lncRNA_divergent	3.636
1199	RP11-115C21.2	RP11-115C21.2	ASO_G0246089_03	65.096	1	50.28	exonic	Nuclear soluble	lncRNA_divergent	3.636
1200	RP11-115C21.2	RP11-115C21.2	ASO_G0246089_04	57.963	1	35.331	exonic	Nuclear soluble	lncRNA_divergent	3.636
1201	RP11-115C21.2	RP11-115C21.2	ASO_G0246089_06	31.356	0	24.419	exonic	Nuclear soluble	lncRNA_divergent	3.636
1202	RP11-115C21.2	RP11-115C21.2	ASO_G0246089_AD_02	55.039	1	33.126	exonic	Nuclear soluble	lncRNA_divergent	3.636
1203	RP11-115C21.2	RP11-115C21.2	ASO_G0246089_AD_03	19.191	0	12.839	exonic	Nuclear soluble	lncRNA_divergent	3.636
1204	RP11-115C21.2	RP11-115C21.2	ASO_G0246089_AD_04	32.999	0	33.556	exonic	Nuclear soluble	lncRNA_divergent	3.636
1205	RP11-115C21.2	RP11-115C21.2	ASO_G0246089_AD_08	48.518	0	-6.99	exonic	Nuclear soluble	lncRNA_divergent	3.636
1206	RP11-115C21.2	RP11-115C21.2	ASO_G0246089_AD_10	70.786	1	69.46	exonic	Nuclear soluble	lncRNA_divergent	3.636
1207	PPP3CB-AS1	RP11-137L10.6	ASO_G0221817_01	28.698	0	34.727	exonic	Chromatin bound	lncRNA_divergent	3.433
1208	PPP3CB-AS1	RP11-137L10.6	ASO_G0221817_03	83.14	1	27.09	exonic	Chromatin bound	lncRNA_divergent	3.433
1209	PPP3CB-AS1	RP11-137L10.6	ASO_G0221817_04	57.164	0	87.187	exonic	Chromatin bound	lncRNA_divergent	3.433
1210	PPP3CB-AS1	RP11-137L10.6	ASO_G0221817_06	7.19	0	25.684	exonic	Chromatin bound	lncRNA_divergent	3.433
1211	PPP3CB-AS1	RP11-137L10.6	ASO_G0221817_07	49.465	0	34.579	exonic	Chromatin bound	lncRNA_divergent	3.433
1212	PPP3CB-AS1	RP11-137L10.6	ASO_G0221817_AD_02	79.907	1	36.406	exonic	Chromatin bound	lncRNA_divergent	3.433
1213	PPP3CB-AS1	RP11-137L10.6	ASO_G0221817_AD_03	59.818	1	16.232	exonic	Chromatin bound	lncRNA_divergent	3.433
1214	PPP3CB-AS1	RP11-137L10.6	ASO_G0221817_AD_04	83.191	1	54.226	exonic	Chromatin bound	lncRNA_divergent	3.433
1215	PPP3CB-AS1	RP11-137L10.6	ASO_G0221817_AD_08	74.737	1	62.063	intronic	Chromatin bound	lncRNA_divergent	3.433
1216	PPP3CB-AS1	RP11-137L10.6	ASO_G0221817_AD_10	61.456	1	16.123	intronic	Chromatin bound	lncRNA_divergent	3.433
1217	RP11-1398P2.1	RP11-1398P2.1	ASO_G0244459_01	0	0	15.766	exonic	Nuclear soluble	lncRNA_intergenic	1.277
1218	RP11-1398P2.1	RP11-1398P2.1	ASO_G0244459_02	0	0	-51.195	exonic	Nuclear soluble	lncRNA_intergenic	1.277
1219	RP11-1398P2.1	RP11-1398P2.1	ASO_G0244459_04	0	0	9.233	exonic	Nuclear soluble	lncRNA_intergenic	1.277
1220	RP11-1398P2.1	RP11-1398P2.1	ASO_G0244459_05	0	0	35.128	exonic	Nuclear soluble	lncRNA_intergenic	1.277
1221	RP11-1398P2.1	RP11-1398P2.1	ASO_G0244459_06	0	0	57.836	exonic	Nuclear soluble	lncRNA_intergenic	1.277
1222	PIGBOS1	RP11-139H15.1	ASO_G0225973_01	54.678	1	0	exonic	Cytoplasmic	lncRNA_divergent	17.001
1223	PIGBOS1	RP11-139H15.1	ASO_G0225973_06	19.495	0	0	exonic	Cytoplasmic	lncRNA_divergent	17.001
1224	PIGBOS1	RP11-139H15.1	ASO_G0225973_08	52.174	1	0	exonic	Cytoplasmic	lncRNA_divergent	17.001
1225	PIGBOS1	RP11-139H15.1	ASO_G0225973_09	2.102	0	0	exonic	Cytoplasmic	lncRNA_divergent	17.001
1226	PIGBOS1	RP11-139H15.1	ASO_G0225973_10	90.656	1	0	exonic	Cytoplasmic	lncRNA_divergent	17.001
1227	PIGBOS1	RP11-139H15.1	ASO_G0225973_AD_01	83.564	1	78.813	intronic	Cytoplasmic	lncRNA_divergent	17.001
1228	PIGBOS1	RP11-139H15.1	ASO_G0225973_AD_02	5.959	0	16.763	exonic	Cytoplasmic	lncRNA_divergent	17.001
1229	PIGBOS1	RP11-139H15.1	ASO_G0225973_AD_03	35.513	0	36.761	exonic	Cytoplasmic	lncRNA_divergent	17.001
1230	PIGBOS1	RP11-139H15.1	ASO_G0225973_AD_05	3.265	0	-3.349	intronic	Cytoplasmic	lncRNA_divergent	17.001
1231	PIGBOS1	RP11-139H15.1	ASO_G0225973_AD_06	81.498	1	37.037	exonic	Cytoplasmic	lncRNA_divergent	17.001
1232	RP11-149I23.3	RP11-149I23.3	ASO_G0232110_04	64.795	1	64.798	exonic	Nuclear soluble	lncRNA_antisense	1.578
1233	RP11-149I23.3	RP11-149I23.3	ASO_G0232110_05	61.223	1	42.89	exonic	Nuclear soluble	lncRNA_antisense	1.578
1234	RP11-149I23.3	RP11-149I23.3	ASO_G0232110_06	49.302	0	53.712	exonic	Nuclear soluble	lncRNA_antisense	1.578
1235	RP11-149I23.3	RP11-149I23.3	ASO_G0232110_07	42.576	0	40.554	exonic	Nuclear soluble	lncRNA_antisense	1.578
1236	RP11-149I23.3	RP11-149I23.3	ASO_G0232110_10	48.025	0	33.021	exonic	Nuclear soluble	lncRNA_antisense	1.578
1237	RP11-149I23.3	RP11-149I23.3	ASO_G0232110_AD_01	54.383	0	39.553	exonic	Nuclear soluble	lncRNA_antisense	1.578
1238	RP11-149I23.3	RP11-149I23.3	ASO_G0232110_AD_02	83.127	1	64.436	exonic	Nuclear soluble	lncRNA_antisense	1.578
1239	RP11-149I23.3	RP11-149I23.3	ASO_G0232110_AD_03	64.796	1	39.98	exonic	Nuclear soluble	lncRNA_antisense	1.578
1240	RP11-149I23.3	RP11-149I23.3	ASO_G0232110_AD_04	52.689	1	54.512	intronic	Nuclear soluble	lncRNA_antisense	1.578
1241	RP11-149I23.3	RP11-149I23.3	ASO_G0232110_AD_06	72.648	1	64.143	exonic	Nuclear soluble	lncRNA_antisense	1.578
1242	LINC01605	RP11-150O12.1	ASO_C013368_01	69.197	1	84.737	exonic	Cytoplasmic	lncRNA_intergenic	7.316
1243	LINC01605	RP11-150O12.1	ASO_C013368_02	92.792	1	92.204	exonic	Cytoplasmic	lncRNA_intergenic	7.316
1244	LINC01605	RP11-150O12.1	ASO_C013368_03	46.032	1	16.939	exonic	Cytoplasmic	lncRNA_intergenic	7.316
1245	LINC01605	RP11-150O12.1	ASO_C013368_04	71.355	1	35.893	exonic	Cytoplasmic	lncRNA_intergenic	7.316
1246	LINC01605	RP11-150O12.1	ASO_C013368_06	64.714	1	41.158	exonic	Cytoplasmic	lncRNA_intergenic	7.316
1247	LINC01605	RP11-150O12.1	ASO_G0253161_01	32.916	0	33.616	exonic	Cytoplasmic	lncRNA_intergenic	7.316
1248	LINC01605	RP11-150O12.1	ASO_G0253161_02	28.395	0	13.684	exonic	Cytoplasmic	lncRNA_intergenic	7.316
1249	LINC01605	RP11-150O12.1	ASO_G0253161_03	38.526	0	3.48	exonic	Cytoplasmic	lncRNA_intergenic	7.316
1250	LINC01605	RP11-150O12.1	ASO_G0253161_04	32.367	0	-10.355	exonic	Cytoplasmic	lncRNA_intergenic	7.316
1251	LINC01605	RP11-150O12.1	ASO_G0253161_05	36.868	0	-2581.25	exonic	Cytoplasmic	lncRNA_intergenic	7.316
1252	LINC01605	RP11-150O12.1	ASO_G0253161_AD_03	0	0	17.539	intronic	Cytoplasmic	lncRNA_intergenic	7.316
1253	LINC01605	RP11-150O12.1	ASO_G0253161_AD_04	0	0	14.586	intronic	Cytoplasmic	lncRNA_intergenic	7.316
1254	LINC01605	RP11-150O12.1	ASO_G0253161_AD_05	0	0	47.68	intronic	Cytoplasmic	lncRNA_intergenic	7.316
1255	LINC01605	RP11-150O12.1	ASO_G0253161_AD_07	0	0	53.401	intronic	Cytoplasmic	lncRNA_intergenic	7.316
1256	LINC01605	RP11-150O12.1	ASO_G0253161_AD_08	0	0	8.013	intronic	Cytoplasmic	lncRNA_intergenic	7.316
1257	RP11-160O5.1	RP11-160O5.1	ASO_G0263470_02	49.055	1	20.013	exonic	Cytoplasmic	lncRNA_divergent	4.577
1258	RP11-160O5.1	RP11-160O5.1	ASO_G0263470_03	45.464	0	7.047	exonic	Cytoplasmic	lncRNA_divergent	4.577
1259	RP11-160O5.1	RP11-160O5.1	ASO_G0263470_04	25.613	0	2.433	exonic	Cytoplasmic	lncRNA_divergent	4.577
1260	RP11-160O5.1	RP11-160O5.1	ASO_G0263470_05	-11.976	0	-33.673	exonic	Cytoplasmic	lncRNA_divergent	4.577
1261	RP11-160O5.1	RP11-160O5.1	ASO_G0263470_06	4.285	0	24.137	exonic	Cytoplasmic	lncRNA_divergent	4.577
1262	LMO7-AS1	RP11-173B14.5	ASO_G0261105_02	30.081	0	70.397	exonic	Chromatin bound	lncRNA_divergent	37.523
1263	LMO7-AS1	RP11-173B14.5	ASO_G0261105_03	54.03	0	32.767	exonic	Chromatin bound	lncRNA_divergent	37.523
1264	LMO7-AS1	RP11-173B14.5	ASO_G0261105_04	27.742	0	-57.113	exonic	Chromatin bound	lncRNA_divergent	37.523
1265	LMO7-AS1	RP11-173B14.5	ASO_G0261105_08	20.05	0	20.664	exonic	Chromatin bound	lncRNA_divergent	37.523
1266	LMO7-AS1	RP11-173B14.5	ASO_G0261105_10	58.09	0	33.166	exonic	Chromatin bound	lncRNA_divergent	37.523
1267	LMO7-AS1	RP11-173B14.5	ASO_G0261105_AD_02	0	0	50.507	exonic	Chromatin bound	lncRNA_divergent	37.523
1268	LMO7-AS1	RP11-173B14.5	ASO_G0261105_AD_05	0	1	77.351	intronic	Chromatin bound	lncRNA_divergent	37.523
1269	LMO7-AS1	RP11-173B14.5	ASO_G0261105_AD_06	0	1	65.935	intronic	Chromatin bound	lncRNA_divergent	37.523
1270	LMO7-AS1	RP11-173B14.5	ASO_G0261105_AD_08	0	0	35.965	intronic	Chromatin bound	lncRNA_divergent	37.523
1271	LMO7-AS1	RP11-173B14.5	ASO_G0261105_AD_10	0	0	77.508	exonic	Chromatin bound	lncRNA_divergent	37.523
1272	RP11-195F19.9	RP11-195F19.9	ASO_G0230074_02	72.345	1	29.772	exonic	Cytoplasmic	lncRNA_divergent	6.308
1273	RP11-195F19.9	RP11-195F19.9	ASO_G0230074_03	6.485	0	14.46	exonic	Cytoplasmic	lncRNA_divergent	6.308
1274	RP11-195F19.9	RP11-195F19.9	ASO_G0230074_04	19.811	0	-6.124	exonic	Cytoplasmic	lncRNA_divergent	6.308
1275	RP11-195F19.9	RP11-195F19.9	ASO_G0230074_05	74.423	1	71.276	exonic	Cytoplasmic	lncRNA_divergent	6.308
1276	RP11-195F19.9	RP11-195F19.9	ASO_G0230074_07	96.106	1	95.751	exonic	Cytoplasmic	lncRNA_divergent	6.308
1277	RP11-206L10.2	RP11-206L10.2	ASO_G0228327_01	19.878	0	39.501	exonic	Chromatin bound	lncRNA_intergenic	13.41
1278	RP11-206L10.2	RP11-206L10.2	ASO_G0228327_02	-59.836	0	-5.475	exonic	Chromatin bound	lncRNA_intergenic	13.41
1279	RP11-206L10.2	RP11-206L10.2	ASO_G0228327_03	-94.609	0	21.042	exonic	Chromatin bound	lncRNA_intergenic	13.41
1280	RP11-206L10.2	RP11-206L10.2	ASO_G0228327_08	-49.474	0	49.934	exonic	Chromatin bound	lncRNA_intergenic	13.41
1281	RP11-206L10.2	RP11-206L10.2	ASO_G0228327_10	-97.818	0	13.637	exonic	Chromatin bound	lncRNA_intergenic	13.41
1282	NINJ2-AS1	RP11-218M22.1	ASO_G0177406_01	0	0	50.997	exonic	Nuclear soluble	lncRNA_divergent	2.131
1283	NINJ2-AS1	RP11-218M22.1	ASO_G0177406_02	0	0	31.778	exonic	Nuclear soluble	lncRNA_divergent	2.131
1284	NINJ2-AS1	RP11-218M22.1	ASO_G0177406_05	0	0	5.49	exonic	Nuclear soluble	lncRNA_divergent	2.131
1285	NINJ2-AS1	RP11-218M22.1	ASO_G0177406_08	0	0	36.282	exonic	Nuclear soluble	lncRNA_divergent	2.131
1286	NINJ2-AS1	RP11-218M22.1	ASO_G0177406_10	0	0	20.334	exonic	Nuclear soluble	lncRNA_divergent	2.131
1287	RP11-220I1.1	RP11-220I1.1	ASO_G0233137_01	25.747	0	41.94	exonic	Cytoplasmic	lncRNA_intergenic	27.943
1288	RP11-220I1.1	RP11-220I1.1	ASO_G0233137_02	82.963	1	88.817	exonic	Cytoplasmic	lncRNA_intergenic	27.943
1289	RP11-220I1.1	RP11-220I1.1	ASO_G0233137_04	64.361	1	68.496	exonic	Cytoplasmic	lncRNA_intergenic	27.943
1290	RP11-220I1.1	RP11-220I1.1	ASO_G0233137_05	73.251	1	58.608	exonic	Cytoplasmic	lncRNA_intergenic	27.943
1291	RP11-220I1.1	RP11-220I1.1	ASO_G0233137_07	50.582	0	46.73	exonic	Cytoplasmic	lncRNA_intergenic	27.943
1292	LINC02454	RP11-221N13.3	ASO_G0256268_01	49.327	0	7.824	exonic	Nuclear soluble	lncRNA_intergenic	9.89
1293	LINC02454	RP11-221N13.3	ASO_G0256268_02	45.428	0	21.165	exonic	Nuclear soluble	lncRNA_intergenic	9.89
1294	LINC02454	RP11-221N13.3	ASO_G0256268_03	56.635	1	-11.547	exonic	Nuclear soluble	lncRNA_intergenic	9.89
1295	LINC02454	RP11-221N13.3	ASO_G0256268_05	49.904	0	34.844	exonic	Nuclear soluble	lncRNA_intergenic	9.89
1296	LINC02454	RP11-221N13.3	ASO_G0256268_AD_01	68.681	1	68.201	intronic	Nuclear soluble	lncRNA_intergenic	9.89
1297	LINC02454	RP11-221N13.3	ASO_G0256268_AD_03	78.393	1	76.956	exonic	Nuclear soluble	lncRNA_intergenic	9.89
1298	LINC02454	RP11-221N13.3	ASO_G0256268_AD_05	58.192	1	6.583	exonic	Nuclear soluble	lncRNA_intergenic	9.89
1299	LINC02454	RP11-221N13.3	ASO_G0256268_AD_06	94.084	1	84.948	exonic	Nuclear soluble	lncRNA_intergenic	9.89
1300	LINC02454	RP11-221N13.3	ASO_G0256268_AD_07	88.872	1	93.849	exonic	Nuclear soluble	lncRNA_intergenic	9.89
1301	ATP2A1-AS1	RP11-22P6.3	ASO_G0260442_01	13.213	0	65.073	exonic	Cytoplasmic	lncRNA_divergent	5.696
1302	ATP2A1-AS1	RP11-22P6.3	ASO_G0260442_02	41.201	0	-1.646	exonic	Cytoplasmic	lncRNA_divergent	5.696
1303	ATP2A1-AS1	RP11-22P6.3	ASO_G0260442_04	34.603	0	26.556	exonic	Cytoplasmic	lncRNA_divergent	5.696
1304	ATP2A1-AS1	RP11-22P6.3	ASO_G0260442_06	31.785	0	4.109	exonic	Cytoplasmic	lncRNA_divergent	5.696
1305	ATP2A1-AS1	RP11-22P6.3	ASO_G0260442_08	21.63	0	23.96	exonic	Cytoplasmic	lncRNA_divergent	5.696
1306	ATP2A1-AS1	RP11-22P6.3	ASO_G0260442_AD_01	33.858	0	-0.727	exonic	Cytoplasmic	lncRNA_divergent	5.696
1307	ATP2A1-AS1	RP11-22P6.3	ASO_G0260442_AD_02	40.57	0	22.054	exonic	Cytoplasmic	lncRNA_divergent	5.696
1308	ATP2A1-AS1	RP11-22P6.3	ASO_G0260442_AD_07	37.92	0	16.434	exonic	Cytoplasmic	lncRNA_divergent	5.696
1309	ATP2A1-AS1	RP11-22P6.3	ASO_G0260442_AD_08	46.618	1	-6.712	exonic	Cytoplasmic	lncRNA_divergent	5.696
1310	ATP2A1-AS1	RP11-22P6.3	ASO_G0260442_AD_10	64.454	1	52.417	exonic	Cytoplasmic	lncRNA_divergent	5.696
1311	RP11-242D8.1	RP11-242D8.1	ASO_G0267002_02	0	0	3.815	exonic	Chromatin bound	lncRNA_divergent	4.512
1312	RP11-242D8.1	RP11-242D8.1	ASO_G0267002_03	0	0	-12.714	exonic	Chromatin bound	lncRNA_divergent	4.512
1313	RP11-242D8.1	RP11-242D8.1	ASO_G0267002_05	0	0	3.649	exonic	Chromatin bound	lncRNA_divergent	4.512
1314	RP11-242D8.1	RP11-242D8.1	ASO_G0267002_08	0	0	46.303	exonic	Chromatin bound	lncRNA_divergent	4.512
1315	RP11-242D8.1	RP11-242D8.1	ASO_G0267002_09	0	0	25.616	exonic	Chromatin bound	lncRNA_divergent	4.512
1316	LINC01204	RP11-245M24.1	ASO_G0229563_02	83.647	1	94.293	exonic	Chromatin bound	lncRNA_intergenic	2.613
1317	LINC01204	RP11-245M24.1	ASO_G0229563_03	51.056	0	34.035	exonic	Chromatin bound	lncRNA_intergenic	2.613
1318	LINC01204	RP11-245M24.1	ASO_G0229563_04	72.085	1	61.132	exonic	Chromatin bound	lncRNA_intergenic	2.613
1319	LINC01204	RP11-245M24.1	ASO_G0229563_05	81.898	1	51.687	exonic	Chromatin bound	lncRNA_intergenic	2.613
1320	LINC01204	RP11-245M24.1	ASO_G0229563_08	72.448	1	17.868	exonic	Chromatin bound	lncRNA_intergenic	2.613
1321	RP11-253M7.1	RP11-253M7.1	ASO_G0259426_01	60.708	1	58.651	exonic	Chromatin bound	lncRNA_divergent	6.633
1322	RP11-253M7.1	RP11-253M7.1	ASO_G0259426_02	93.738	1	85.231	exonic	Chromatin bound	lncRNA_divergent	6.633
1323	RP11-253M7.1	RP11-253M7.1	ASO_G0259426_03	67.381	1	9.719	exonic	Chromatin bound	lncRNA_divergent	6.633
1324	RP11-253M7.1	RP11-253M7.1	ASO_G0259426_05	54.871	1	12.944	exonic	Chromatin bound	lncRNA_divergent	6.633
1325	RP11-253M7.1	RP11-253M7.1	ASO_G0259426_09	47.045	1	-7.62	exonic	Chromatin bound	lncRNA_divergent	6.633
1326	RP11-253M7.1	RP11-253M7.1	ASO_G0259426_AD_01	80.04	1	68.57	exonic	Chromatin bound	lncRNA_divergent	6.633
1327	RP11-253M7.1	RP11-253M7.1	ASO_G0259426_AD_03	93.71	1	76.153	exonic	Chromatin bound	lncRNA_divergent	6.633
1328	RP11-253M7.1	RP11-253M7.1	ASO_G0259426_AD_06	80.95	1	17.1	exonic	Chromatin bound	lncRNA_divergent	6.633
1329	RP11-253M7.1	RP11-253M7.1	ASO_G0259426_AD_07	65.319	1	25.427	exonic	Chromatin bound	lncRNA_divergent	6.633
1330	RP11-253M7.1	RP11-253M7.1	ASO_G0259426_AD_10	81.493	1	50.999	exonic	Chromatin bound	lncRNA_divergent	6.633
1331	RP11-25K19.1	RP11-25K19.1	ASO_G0167912_01	0	0	11.999	exonic	Cytoplasmic	lncRNA_divergent	5.792
1332	RP11-25K19.1	RP11-25K19.1	ASO_G0167912_02	0	0	14.7	exonic	Cytoplasmic	lncRNA_divergent	5.792
1333	RP11-25K19.1	RP11-25K19.1	ASO_G0167912_04	0	0	39.071	exonic	Cytoplasmic	lncRNA_divergent	5.792
1334	RP11-25K19.1	RP11-25K19.1	ASO_G0167912_05	0	0	40.59	exonic	Cytoplasmic	lncRNA_divergent	5.792
1335	RP11-25K19.1	RP11-25K19.1	ASO_G0167912_07	0	0	9.704	exonic	Cytoplasmic	lncRNA_divergent	5.792
1336	RP11-295G20.2	RP11-295G20.2	ASO_G0233461_01	21.718	0	54.967	exonic	Cytoplasmic	lncRNA_divergent	8.312
1337	RP11-295G20.2	RP11-295G20.2	ASO_G0233461_03	76	1	94.769	exonic	Cytoplasmic	lncRNA_divergent	8.312
1338	RP11-295G20.2	RP11-295G20.2	ASO_G0233461_05	51.393	0	43.36	exonic	Cytoplasmic	lncRNA_divergent	8.312
1339	RP11-295G20.2	RP11-295G20.2	ASO_G0233461_07	15.173	0	31.924	exonic	Cytoplasmic	lncRNA_divergent	8.312
1340	RP11-295G20.2	RP11-295G20.2	ASO_G0233461_09	4.852	0	37.922	exonic	Cytoplasmic	lncRNA_divergent	8.312
1341	RP11-295G20.2	RP11-295G20.2	ASO_G0233461_AD_02	60.303	1	9.489	exonic	Cytoplasmic	lncRNA_divergent	8.312
1342	RP11-295G20.2	RP11-295G20.2	ASO_G0233461_AD_03	82.642	1	84.292	exonic	Cytoplasmic	lncRNA_divergent	8.312
1343	RP11-295G20.2	RP11-295G20.2	ASO_G0233461_AD_04	68.973	1	43.764	exonic	Cytoplasmic	lncRNA_divergent	8.312
1344	RP11-295G20.2	RP11-295G20.2	ASO_G0233461_AD_06	50.317	1	39.409	exonic	Cytoplasmic	lncRNA_divergent	8.312
1345	RP11-295G20.2	RP11-295G20.2	ASO_G0233461_AD_07	51.364	0	24.652	exonic	Cytoplasmic	lncRNA_divergent	8.312
1346	PRDX6-AS1	RP11-296O14.3	ASO_G0203739_01	58.478	1	48.087	exonic	Chromatin bound	lncRNA_divergent	11.832
1347	PRDX6-AS1	RP11-296O14.3	ASO_G0203739_02	54.013	0	28.366	exonic	Chromatin bound	lncRNA_divergent	11.832
1348	PRDX6-AS1	RP11-296O14.3	ASO_G0203739_07	50.148	1	48.961	exonic	Chromatin bound	lncRNA_divergent	11.832
1349	PRDX6-AS1	RP11-296O14.3	ASO_G0203739_08	44.039	0	26.732	exonic	Chromatin bound	lncRNA_divergent	11.832
1350	PRDX6-AS1	RP11-296O14.3	ASO_G0203739_10	38.337	0	62.309	exonic	Chromatin bound	lncRNA_divergent	11.832
1351	PRDX6-AS1	RP11-296O14.3	ASO_G0203739_AD_03	65.984	1	46.603	exonic	Chromatin bound	lncRNA_divergent	11.832
1352	PRDX6-AS1	RP11-296O14.3	ASO_G0203739_AD_04	74.604	1	23.907	exonic	Chromatin bound	lncRNA_divergent	11.832
1353	PRDX6-AS1	RP11-296O14.3	ASO_G0203739_AD_05	88.344	1	17.197	intronic	Chromatin bound	lncRNA_divergent	11.832
1354	PRDX6-AS1	RP11-296O14.3	ASO_G0203739_AD_07	71.971	1	29.05	exonic	Chromatin bound	lncRNA_divergent	11.832
1355	TBX2-AS1	RP11-332H18.4	ASO_G0267280_03	73.379	1	26.432	exonic	Chromatin bound	lncRNA_divergent	12.059
1356	TBX2-AS1	RP11-332H18.4	ASO_G0267280_04	81.396	1	50.418	exonic	Chromatin bound	lncRNA_divergent	12.059
1357	TBX2-AS1	RP11-332H18.4	ASO_G0267280_07	43.121	0	26.369	exonic	Chromatin bound	lncRNA_divergent	12.059
1358	TBX2-AS1	RP11-332H18.4	ASO_G0267280_08	88.212	1	41.099	exonic	Chromatin bound	lncRNA_divergent	12.059
1359	TBX2-AS1	RP11-332H18.4	ASO_G0267280_09	49.744	1	57.242	exonic	Chromatin bound	lncRNA_divergent	12.059
1360	RP11-333E1.1	RP11-333E1.1	ASO_G0261879_02	19.482	0	28.045	exonic	Chromatin bound	lncRNA_divergent	4.802
1361	RP11-333E1.1	RP11-333E1.1	ASO_G0261879_03	58.132	0	32.652	exonic	Chromatin bound	lncRNA_divergent	4.802
1362	RP11-333E1.1	RP11-333E1.1	ASO_G0261879_05	84.452	1	71.608	exonic	Chromatin bound	lncRNA_divergent	4.802
1363	RP11-333E1.1	RP11-333E1.1	ASO_G0261879_08	44.351	0	14.557	exonic	Chromatin bound	lncRNA_divergent	4.802
1364	RP11-333E1.1	RP11-333E1.1	ASO_G0261879_09	17.937	0	45.739	exonic	Chromatin bound	lncRNA_divergent	4.802
1365	RP11-333E1.1	RP11-333E1.1	ASO_G0261879_AD_01	28.817	0	75.122	intronic	Chromatin bound	lncRNA_divergent	4.802
1366	RP11-333E1.1	RP11-333E1.1	ASO_G0261879_AD_03	30.773	0	-13.203	intronic	Chromatin bound	lncRNA_divergent	4.802
1367	RP11-333E1.1	RP11-333E1.1	ASO_G0261879_AD_04	51.726	0	7.079	exonic	Chromatin bound	lncRNA_divergent	4.802
1368	RP11-333E1.1	RP11-333E1.1	ASO_G0261879_AD_05	58.272	0	-28.91	intronic	Chromatin bound	lncRNA_divergent	4.802
1369	RP11-333E1.1	RP11-333E1.1	ASO_G0261879_AD_07	90.753	1	76.056	intronic	Chromatin bound	lncRNA_divergent	4.802
1370	RP11-33B1.1	RP11-33B1.1	ASO_G0245958_01	41.05	0	69.53	exonic	Chromatin bound	pseudogene	21.64
1371	RP11-33B1.1	RP11-33B1.1	ASO_G0245958_02	49.457	0	11.859	exonic	Chromatin bound	pseudogene	21.64
1372	RP11-33B1.1	RP11-33B1.1	ASO_G0245958_05	71.243	1	39.043	exonic	Chromatin bound	pseudogene	21.64
1373	RP11-33B1.1	RP11-33B1.1	ASO_G0245958_09	58.81	1	23.358	exonic	Chromatin bound	pseudogene	21.64
1374	RP11-33B1.1	RP11-33B1.1	ASO_G0245958_10	64.571	1	21.431	exonic	Chromatin bound	pseudogene	21.64
1375	RP11-33B1.1	RP11-33B1.1	ASO_G0245958_AD_01	53.896	1	30.705	exonic	Chromatin bound	pseudogene	21.64
1376	RP11-33B1.1	RP11-33B1.1	ASO_G0245958_AD_02	55.001	1	18.636	intronic	Chromatin bound	pseudogene	21.64
1377	RP11-33B1.1	RP11-33B1.1	ASO_G0245958_AD_04	68.083	1	61.278	exonic	Chromatin bound	pseudogene	21.64
1378	RP11-33B1.1	RP11-33B1.1	ASO_G0245958_AD_06	22.9	0	16.339	intronic	Chromatin bound	pseudogene	21.64
1379	RP11-33B1.1	RP11-33B1.1	ASO_G0245958_AD_07	22.964	0	22.629	intronic	Chromatin bound	pseudogene	21.64
1380	RP11-345P4.9	RP11-345P4.9	ASO_G0272106_01	53.028	0	8.334	exonic	Nuclear soluble	lncRNA_divergent	3.105
1381	RP11-345P4.9	RP11-345P4.9	ASO_G0272106_02	44.477	1	7.307	exonic	Nuclear soluble	lncRNA_divergent	3.105
1382	RP11-345P4.9	RP11-345P4.9	ASO_G0272106_03	33.632	0	10.416	exonic	Nuclear soluble	lncRNA_divergent	3.105
1383	RP11-345P4.9	RP11-345P4.9	ASO_G0272106_07	35.744	0	27.445	exonic	Nuclear soluble	lncRNA_divergent	3.105
1384	RP11-345P4.9	RP11-345P4.9	ASO_G0272106_08	-106.374	0	41.498	exonic	Nuclear soluble	lncRNA_divergent	3.105
1385	LINC02762	RP11-356J5.12	ASO_G0250303_03	0	0	17.591	exonic	Cytoplasmic	lncRNA_intergenic	13.612
1386	LINC02762	RP11-356J5.12	ASO_G0250303_07	0	0	31.221	exonic	Cytoplasmic	lncRNA_intergenic	13.612
1387	LINC02762	RP11-356J5.12	ASO_G0250303_08	0	0	32.713	exonic	Cytoplasmic	lncRNA_intergenic	13.612
1388	LINC02762	RP11-356J5.12	ASO_G0250303_09	0	0	51.152	exonic	Cytoplasmic	lncRNA_intergenic	13.612
1389	LINC02762	RP11-356J5.12	ASO_G0250303_10	0	0	31.743	exonic	Cytoplasmic	lncRNA_intergenic	13.612
1390	LINC01278	RP11-357C3.3	ASO_G0235437_05	69.124	1	60.963	exonic	Chromatin bound	lncRNA_intergenic	20.091
1391	LINC01278	RP11-357C3.3	ASO_G0235437_06	91.064	1	79.758	exonic	Chromatin bound	lncRNA_intergenic	20.091
1392	LINC01278	RP11-357C3.3	ASO_G0235437_07	84.457	1	46.83	exonic	Chromatin bound	lncRNA_intergenic	20.091
1393	LINC01278	RP11-357C3.3	ASO_G0235437_08	81.889	1	40.005	exonic	Chromatin bound	lncRNA_intergenic	20.091
1394	LINC01278	RP11-357C3.3	ASO_G0235437_09	80.84	1	64.152	exonic	Chromatin bound	lncRNA_intergenic	20.091
1395	RP11-379H18.1	RP11-379H18.1	ASO_G0271122_01	35.032	0	52.268	exonic	Cytoplasmic	lncRNA_divergent	7.808
1396	RP11-379H18.1	RP11-379H18.1	ASO_G0271122_03	38.002	0	15.273	exonic	Cytoplasmic	lncRNA_divergent	7.808
1397	RP11-379H18.1	RP11-379H18.1	ASO_G0271122_04	43.045	0	28.386	exonic	Cytoplasmic	lncRNA_divergent	7.808
1398	RP11-379H18.1	RP11-379H18.1	ASO_G0271122_05	29.43	0	66.958	exonic	Cytoplasmic	lncRNA_divergent	7.808
1399	RP11-379H18.1	RP11-379H18.1	ASO_G0271122_06	28.396	0	66.72	exonic	Cytoplasmic	lncRNA_divergent	7.808
1400	RP11-37B2.1	RP11-37B2.1	ASO_G0251136_02	0	0	25.787	exonic	Chromatin bound	lncRNA_divergent	6.795
1401	RP11-37B2.1	RP11-37B2.1	ASO_G0251136_04	0	0	47.453	exonic	Chromatin bound	lncRNA_divergent	6.795
1402	RP11-37B2.1	RP11-37B2.1	ASO_G0251136_07	0	0	22.674	exonic	Chromatin bound	lncRNA_divergent	6.795
1403	RP11-37B2.1	RP11-37B2.1	ASO_G0251136_08	0	0	15.113	exonic	Chromatin bound	lncRNA_divergent	6.795
1404	RP11-37B2.1	RP11-37B2.1	ASO_G0251136_09	0	0	38.192	exonic	Chromatin bound	lncRNA_divergent	6.795
1405	RP11-38L15.3	RP11-38L15.3	ASO_G0231187_01	42.094	0	60.395	exonic	Chromatin bound	lncRNA_antisense	2.219
1406	RP11-38L15.3	RP11-38L15.3	ASO_G0231187_02	91.85	1	70.519	exonic	Chromatin bound	lncRNA_antisense	2.219
1407	RP11-38L15.3	RP11-38L15.3	ASO_G0231187_04	10.43	0	27.608	exonic	Chromatin bound	lncRNA_antisense	2.219
1408	RP11-38L15.3	RP11-38L15.3	ASO_G0231187_07	64.855	1	74.632	exonic	Chromatin bound	lncRNA_antisense	2.219
1409	RP11-38L15.3	RP11-38L15.3	ASO_G0231187_08	48.484	0	58.436	exonic	Chromatin bound	lncRNA_antisense	2.219
1410	RP11-390P2.4	RP11-390P2.4	ASO_G0225177_01	0	0	31.333	exonic	Nuclear soluble	lncRNA_divergent	4.168
1411	RP11-390P2.4	RP11-390P2.4	ASO_G0225177_02	0	0	27.674	exonic	Nuclear soluble	lncRNA_divergent	4.168
1412	RP11-390P2.4	RP11-390P2.4	ASO_G0225177_06	0	0	28.233	exonic	Nuclear soluble	lncRNA_divergent	4.168
1413	RP11-390P2.4	RP11-390P2.4	ASO_G0225177_07	0	0	41.315	exonic	Nuclear soluble	lncRNA_divergent	4.168
1414	RP11-390P2.4	RP11-390P2.4	ASO_G0225177_10	0	0	16.023	exonic	Nuclear soluble	lncRNA_divergent	4.168
1415	MUC12-AS1	RP11-395B7.4	ASO_G0227053_01	8.716	0	5.902	exonic	Cytoplasmic	lncRNA_divergent	15.821
1416	MUC12-AS1	RP11-395B7.4	ASO_G0227053_03	85.554	1	87.28	exonic	Cytoplasmic	lncRNA_divergent	15.821
1417	MUC12-AS1	RP11-395B7.4	ASO_G0227053_04	81.595	1	82.126	exonic	Cytoplasmic	lncRNA_divergent	15.821
1418	MUC12-AS1	RP11-395B7.4	ASO_G0227053_07	65.391	1	22.72	exonic	Cytoplasmic	lncRNA_divergent	15.821
1419	MUC12-AS1	RP11-395B7.4	ASO_G0227053_08	14.909	0	9.769	exonic	Cytoplasmic	lncRNA_divergent	15.821
1420	RP11-398K22.12	RP11-398K22.12	ASO_G0229852_01	40.317	0	42.093	exonic	Chromatin bound	lncRNA_divergent	6.374
1421	RP11-398K22.12	RP11-398K22.12	ASO_G0229852_03	59.055	1	66.525	exonic	Chromatin bound	lncRNA_divergent	6.374
1422	RP11-398K22.12	RP11-398K22.12	ASO_G0229852_04	56.091	0	0	exonic	Chromatin bound	lncRNA_divergent	6.374
1423	RP11-398K22.12	RP11-398K22.12	ASO_G0229852_05	76.869	1	82.478	exonic	Chromatin bound	lncRNA_divergent	6.374
1424	RP11-398K22.12	RP11-398K22.12	ASO_G0229852_07	50.759	0	32.451	exonic	Chromatin bound	lncRNA_divergent	6.374
1425	RP11-398K22.12	RP11-398K22.12	ASO_G0229852_AD_01	0	1	71.431	exonic	Chromatin bound	lncRNA_divergent	6.374
1426	RP11-398K22.12	RP11-398K22.12	ASO_G0229852_AD_02	0	0	22.124	exonic	Chromatin bound	lncRNA_divergent	6.374
1427	RP11-398K22.12	RP11-398K22.12	ASO_G0229852_AD_03	0	1	40.431	exonic	Chromatin bound	lncRNA_divergent	6.374
1428	RP11-398K22.12	RP11-398K22.12	ASO_G0229852_AD_08	0	1	69.716	exonic	Chromatin bound	lncRNA_divergent	6.374
1429	RP11-398K22.12	RP11-398K22.12	ASO_G0229852_AD_09	0	0	22.054	exonic	Chromatin bound	lncRNA_divergent	6.374
1430	LINC01615	RP11-417E7.1	ASO_G0223485_01	85.763	1	70.933	exonic	Cytoplasmic	lncRNA_intergenic	18.451
1431	LINC01615	RP11-417E7.1	ASO_G0223485_02	56.719	1	38.352	exonic	Cytoplasmic	lncRNA_intergenic	18.451
1432	LINC01615	RP11-417E7.1	ASO_G0223485_03	57.454	1	27.658	exonic	Cytoplasmic	lncRNA_intergenic	18.451
1433	LINC01615	RP11-417E7.1	ASO_G0223485_04	30.438	0	17.207	exonic	Cytoplasmic	lncRNA_intergenic	18.451
1434	LINC01615	RP11-417E7.1	ASO_G0223485_05	57.582	1	21.071	exonic	Cytoplasmic	lncRNA_intergenic	18.451
1435	LINC01615	RP11-417E7.1	ASO_G0223485_AD_01	28.536	0	-4.162	exonic	Cytoplasmic	lncRNA_intergenic	18.451
1436	LINC01615	RP11-417E7.1	ASO_G0223485_AD_04	90.454	1	73.209	intronic	Cytoplasmic	lncRNA_intergenic	18.451
1437	LINC01615	RP11-417E7.1	ASO_G0223485_AD_06	46.352	1	54.346	exonic	Cytoplasmic	lncRNA_intergenic	18.451
1438	LINC01615	RP11-417E7.1	ASO_G0223485_AD_07	80.852	1	37.872	exonic	Cytoplasmic	lncRNA_intergenic	18.451
1439	LINC01615	RP11-417E7.1	ASO_G0223485_AD_08	13.319	0	56.582	exonic	Cytoplasmic	lncRNA_intergenic	18.451
1440	LINC01137	RP11-422J8.1	ASO_G0233621_01	71.593	1	57.218	exonic	Cytoplasmic	lncRNA_divergent	3.239
1441	LINC01137	RP11-422J8.1	ASO_G0233621_04	51.516	0	10.608	exonic	Cytoplasmic	lncRNA_divergent	3.239
1442	LINC01137	RP11-422J8.1	ASO_G0233621_05	50.711	1	55.131	exonic	Cytoplasmic	lncRNA_divergent	3.239
1443	LINC01137	RP11-422J8.1	ASO_G0233621_06	46.384	0	12.803	exonic	Cytoplasmic	lncRNA_divergent	3.239
1444	LINC01137	RP11-422J8.1	ASO_G0233621_09	66.497	1	34.439	exonic	Cytoplasmic	lncRNA_divergent	3.239
1445	RP11-428J1.5	RP11-428J1.5	ASO_G0272142_01	29.57	0	25.682	exonic	Cytoplasmic	lncRNA_divergent	4.445
1446	RP11-428J1.5	RP11-428J1.5	ASO_G0272142_02	30.774	0	2.686	exonic	Cytoplasmic	lncRNA_divergent	4.445
1447	RP11-428J1.5	RP11-428J1.5	ASO_G0272142_03	33.361	0	33.893	exonic	Cytoplasmic	lncRNA_divergent	4.445
1448	RP11-428J1.5	RP11-428J1.5	ASO_G0272142_05	40.062	0	20.765	exonic	Cytoplasmic	lncRNA_divergent	4.445
1449	RP11-428J1.5	RP11-428J1.5	ASO_G0272142_07	21.926	0	9.47	exonic	Cytoplasmic	lncRNA_divergent	4.445
1450	RP11-432J22.2	RP11-432J22.2	ASO_G0238058_01	48.906	0	27.39	exonic	Chromatin bound	lncRNA_divergent	5.319
1451	RP11-432J22.2	RP11-432J22.2	ASO_G0238058_03	47.978	1	17.027	exonic	Chromatin bound	lncRNA_divergent	5.319
1452	RP11-432J22.2	RP11-432J22.2	ASO_G0238058_07	39.52	0	8.426	exonic	Chromatin bound	lncRNA_divergent	5.319
1453	RP11-432J22.2	RP11-432J22.2	ASO_G0238058_08	48.302	0	32.506	exonic	Chromatin bound	lncRNA_divergent	5.319
1454	LINC01719	RP11-458D21.1	ASO_G0233396_01	46.875	1	46.157	exonic	Chromatin bound	lncRNA_intergenic	1.247
1455	LINC01719	RP11-458D21.1	ASO_G0233396_02	73.778	1	76.297	exonic	Chromatin bound	lncRNA_intergenic	1.247
1456	LINC01719	RP11-458D21.1	ASO_G0233396_06	18.627	0	31.774	exonic	Chromatin bound	lncRNA_intergenic	1.247
1457	LINC01719	RP11-458D21.1	ASO_G0233396_07	98.42	1	99.116	exonic	Chromatin bound	lncRNA_intergenic	1.247
1458	LINC01719	RP11-458D21.1	ASO_G0233396_10	34.59	0	44.392	exonic	Chromatin bound	lncRNA_intergenic	1.247
1459	FOXC2-AS1	RP11-463O9.5	ASO_G0260944_03	44.675	0	17.118	exonic	Cytoplasmic	lncRNA_divergent	0.897
1460	FOXC2-AS1	RP11-463O9.5	ASO_G0260944_04	29.741	0	42.092	exonic	Cytoplasmic	lncRNA_divergent	0.897
1461	FOXC2-AS1	RP11-463O9.5	ASO_G0260944_05	21.651	0	10.452	exonic	Cytoplasmic	lncRNA_divergent	0.897
1462	FOXC2-AS1	RP11-463O9.5	ASO_G0260944_06	13.677	0	2.92	exonic	Cytoplasmic	lncRNA_divergent	0.897
1463	FOXC2-AS1	RP11-463O9.5	ASO_G0260944_08	20.387	0	-9.456	exonic	Cytoplasmic	lncRNA_divergent	0.897
1464	ZNF213-AS1	RP11-473M20.14	ASO_G0263072_01	96.942	1	84.917	exonic	Nuclear soluble	lncRNA_divergent	8.307
1465	ZNF213-AS1	RP11-473M20.14	ASO_G0263072_02	87.983	1	69.892	exonic	Nuclear soluble	lncRNA_divergent	8.307
1466	ZNF213-AS1	RP11-473M20.14	ASO_G0263072_03	45.295	0	50.765	exonic	Nuclear soluble	lncRNA_divergent	8.307
1467	ZNF213-AS1	RP11-473M20.14	ASO_G0263072_05	76.189	1	82.389	exonic	Nuclear soluble	lncRNA_divergent	8.307
1468	ZNF213-AS1	RP11-473M20.14	ASO_G0263072_06	95.681	1	89.284	exonic	Nuclear soluble	lncRNA_divergent	8.307
1469	RP11-474B16.1	RP11-474B16.1	ASO_G0257642_01	95.678	1	72.642	exonic	Chromatin bound	lncRNA_divergent	8.643
1470	RP11-474B16.1	RP11-474B16.1	ASO_G0257642_02	73.129	1	32.621	exonic	Chromatin bound	lncRNA_divergent	8.643
1471	RP11-474B16.1	RP11-474B16.1	ASO_G0257642_03	92.827	1	34.504	exonic	Chromatin bound	lncRNA_divergent	8.643
1472	RP11-474B16.1	RP11-474B16.1	ASO_G0257642_05	83.464	1	5.773	exonic	Chromatin bound	lncRNA_divergent	8.643
1473	RP11-474B16.1	RP11-474B16.1	ASO_G0257642_09	93.381	1	44.314	exonic	Chromatin bound	lncRNA_divergent	8.643
1474	RP11-474B16.1	RP11-474B16.1	ASO_G0257642_AD_04	34.968	0	31.464	intronic	Chromatin bound	lncRNA_divergent	8.643
1475	RP11-474B16.1	RP11-474B16.1	ASO_G0257642_AD_06	71.361	1	26.017	intronic	Chromatin bound	lncRNA_divergent	8.643
1476	RP11-474B16.1	RP11-474B16.1	ASO_G0257642_AD_10	31.062	0	18.64	intronic	Chromatin bound	lncRNA_divergent	8.643
1477	RP11-474P2.4	RP11-474P2.4	ASO_C0019316_01	61.398	1	59.095	exonic	Chromatin bound	lncRNA_intergenic	2.523
1478	RP11-474P2.4	RP11-474P2.4	ASO_C0019316_02	34.384	0	40.6	exonic	Chromatin bound	lncRNA_intergenic	2.523
1479	RP11-474P2.4	RP11-474P2.4	ASO_C0019316_04	36.578	0	49.448	exonic	Chromatin bound	lncRNA_intergenic	2.523
1480	RP11-474P2.4	RP11-474P2.4	ASO_C0019316_07	35.711	0	47.065	exonic	Chromatin bound	lncRNA_intergenic	2.523
1481	RP11-474P2.4	RP11-474P2.4	ASO_C0019316_08	60.915	1	57.5	exonic	Chromatin bound	lncRNA_intergenic	2.523
1482	LINC01133	RP11-48O20.4	ASO_G0224259_01	90.77	1	30.887	exonic	Cytoplasmic	lncRNA_intergenic	1.005
1483	LINC01133	RP11-48O20.4	ASO_G0224259_02	93.255	1	15.336	exonic	Cytoplasmic	lncRNA_intergenic	1.005
1484	LINC01133	RP11-48O20.4	ASO_G0224259_05	90.195	1	32.591	exonic	Cytoplasmic	lncRNA_intergenic	1.005
1485	LINC01133	RP11-48O20.4	ASO_G0224259_06	91.883	1	5.785	exonic	Cytoplasmic	lncRNA_intergenic	1.005
1486	LINC01133	RP11-48O20.4	ASO_G0224259_08	52.364	1	33.531	exonic	Cytoplasmic	lncRNA_intergenic	1.005
1487	RP11-499E18.1	RP11-499E18.1	ASO_G0248161_02	36.502	0	-0.507	exonic	Nuclear soluble	lncRNA_sense_intronic	2.632
1488	RP11-499E18.1	RP11-499E18.1	ASO_G0248161_03	18.828	0	33.031	exonic	Nuclear soluble	lncRNA_sense_intronic	2.632
1489	RP11-499E18.1	RP11-499E18.1	ASO_G0248161_04	45.623	0	10.909	exonic	Nuclear soluble	lncRNA_sense_intronic	2.632
1490	RP11-499E18.1	RP11-499E18.1	ASO_G0248161_06	16.761	0	1.476	exonic	Nuclear soluble	lncRNA_sense_intronic	2.632
1491	RP11-499E18.1	RP11-499E18.1	ASO_G0248161_09	25.944	0	25.36	exonic	Nuclear soluble	lncRNA_sense_intronic	2.632
1492	RP11-500C11.3	RP11-500C11.3	ASO_G0272269_02	26.278	0	-8.917	exonic	Cytoplasmic	lncRNA_divergent	3.085
1493	RP11-500C11.3	RP11-500C11.3	ASO_G0272269_04	57.029	1	25.734	exonic	Cytoplasmic	lncRNA_divergent	3.085
1494	RP11-500C11.3	RP11-500C11.3	ASO_G0272269_05	-2.937	0	25.568	exonic	Cytoplasmic	lncRNA_divergent	3.085
1495	RP11-500C11.3	RP11-500C11.3	ASO_G0272269_06	50.808	1	58.859	exonic	Cytoplasmic	lncRNA_divergent	3.085
1496	RP11-500C11.3	RP11-500C11.3	ASO_G0272269_08	60.395	1	39.706	exonic	Cytoplasmic	lncRNA_divergent	3.085
1497	RP11-500C11.3	RP11-500C11.3	ASO_G0272269_AD_01	22.661	0	-27.388	exonic	Cytoplasmic	lncRNA_divergent	3.085
1498	RP11-500C11.3	RP11-500C11.3	ASO_G0272269_AD_02	17.531	0	0.024	exonic	Cytoplasmic	lncRNA_divergent	3.085
1499	RP11-500C11.3	RP11-500C11.3	ASO_G0272269_AD_03	58.718	0	-31.979	exonic	Cytoplasmic	lncRNA_divergent	3.085
1500	RP11-500C11.3	RP11-500C11.3	ASO_G0272269_AD_08	16.028	0	-5.653	exonic	Cytoplasmic	lncRNA_divergent	3.085
1501	RP11-500C11.3	RP11-500C11.3	ASO_G0272269_AD_10	53.916	0	32.508	exonic	Cytoplasmic	lncRNA_divergent	3.085
1502	RP11-517P14.2	RP11-517P14.2	ASO_G0230555_01	0	0	-10.183	exonic	Cytoplasmic	lncRNA_intergenic	2.176
1503	RP11-517P14.2	RP11-517P14.2	ASO_G0230555_02	0	0	2.535	exonic	Cytoplasmic	lncRNA_intergenic	2.176
1504	RP11-517P14.2	RP11-517P14.2	ASO_G0230555_03	0	0	25.805	exonic	Cytoplasmic	lncRNA_intergenic	2.176
1505	RP11-517P14.2	RP11-517P14.2	ASO_G0230555_06	0	0	22.884	exonic	Cytoplasmic	lncRNA_intergenic	2.176
1506	RP11-517P14.2	RP11-517P14.2	ASO_G0230555_07	0	0	1.543	exonic	Cytoplasmic	lncRNA_intergenic	2.176
1507	RP11-527D7.1	RP11-527D7.1	ASO_G0225554_01	44.779	0	23.672	exonic	Nuclear soluble	lncRNA_intergenic	5.055
1508	RP11-527D7.1	RP11-527D7.1	ASO_G0225554_02	32.987	0	71.193	exonic	Nuclear soluble	lncRNA_intergenic	5.055
1509	RP11-527D7.1	RP11-527D7.1	ASO_G0225554_04	43.066	0	26.377	exonic	Nuclear soluble	lncRNA_intergenic	5.055
1510	RP11-527D7.1	RP11-527D7.1	ASO_G0225554_05	-43.715	0	39.202	exonic	Nuclear soluble	lncRNA_intergenic	5.055
1511	RP11-527D7.1	RP11-527D7.1	ASO_G0225554_07	2.189	0	11.967	exonic	Nuclear soluble	lncRNA_intergenic	5.055
1512	RP11-527D7.1	RP11-527D7.1	ASO_G0225554_AD_01	51.82	0	31.854	intronic	Nuclear soluble	lncRNA_intergenic	5.055
1513	RP11-527D7.1	RP11-527D7.1	ASO_G0225554_AD_03	18.583	0	17.748	intronic	Nuclear soluble	lncRNA_intergenic	5.055
1514	RP11-527D7.1	RP11-527D7.1	ASO_G0225554_AD_04	79.994	1	64.759	intronic	Nuclear soluble	lncRNA_intergenic	5.055
1515	RP11-527D7.1	RP11-527D7.1	ASO_G0225554_AD_05	25.554	0	6.379	intronic	Nuclear soluble	lncRNA_intergenic	5.055
1516	RP11-527D7.1	RP11-527D7.1	ASO_G0225554_AD_06	76.589	1	38.997	intronic	Nuclear soluble	lncRNA_intergenic	5.055
1517	LINC02482	RP11-539L10.3	ASO_G0251580_01	93.108	1	76.974	exonic	Nuclear soluble	lncRNA_divergent	2.92
1518	LINC02482	RP11-539L10.3	ASO_G0251580_05	79.517	0	22.324	exonic	Nuclear soluble	lncRNA_divergent	2.92
1519	LINC02482	RP11-539L10.3	ASO_G0251580_07	82.744	0	24.556	exonic	Nuclear soluble	lncRNA_divergent	2.92
1520	LINC02482	RP11-539L10.3	ASO_G0251580_08	67.52	0	-6.739	exonic	Nuclear soluble	lncRNA_divergent	2.92
1521	LINC02482	RP11-539L10.3	ASO_G0251580_10	66.91	0	17.946	exonic	Nuclear soluble	lncRNA_divergent	2.92
1522	LINC02482	RP11-539L10.3	ASO_G0251580_AD_01	70.187	1	97.973	exonic	Nuclear soluble	lncRNA_divergent	2.92
1523	LINC02482	RP11-539L10.3	ASO_G0251580_AD_03	16.378	0	95.152	exonic	Nuclear soluble	lncRNA_divergent	2.92
1524	LINC02482	RP11-539L10.3	ASO_G0251580_AD_05	73.424	1	94.714	exonic	Nuclear soluble	lncRNA_divergent	2.92
1525	LINC02482	RP11-539L10.3	ASO_G0251580_AD_09	37.672	0	97.609	exonic	Nuclear soluble	lncRNA_divergent	2.92
1526	LINC02482	RP11-539L10.3	ASO_G0251580_AD_10	19.92	0	95.335	exonic	Nuclear soluble	lncRNA_divergent	2.92
1527	LINC02709	RP11-540A21.2	ASO_G0245522_04	26.664	0	23.614	exonic	Nuclear soluble	lncRNA_intergenic	4.014
1528	LINC02709	RP11-540A21.2	ASO_G0245522_05	37.008	0	14.5	exonic	Nuclear soluble	lncRNA_intergenic	4.014
1529	LINC02709	RP11-540A21.2	ASO_G0245522_07	33.963	0	26.087	exonic	Nuclear soluble	lncRNA_intergenic	4.014
1530	LINC02709	RP11-540A21.2	ASO_G0245522_10	39.498	0	37.005	exonic	Nuclear soluble	lncRNA_intergenic	4.014
1531	RP11-545E17.3	RP11-545E17.3	ASO_G0223478_01	68.135	1	14.551	exonic	Cytoplasmic	lncRNA_divergent	7.394
1532	RP11-545E17.3	RP11-545E17.3	ASO_G0223478_02	57.896	1	48.613	exonic	Cytoplasmic	lncRNA_divergent	7.394
1533	RP11-545E17.3	RP11-545E17.3	ASO_G0223478_03	75.637	1	70.96	exonic	Cytoplasmic	lncRNA_divergent	7.394
1534	RP11-545E17.3	RP11-545E17.3	ASO_G0223478_05	55.11	1	37.831	exonic	Cytoplasmic	lncRNA_divergent	7.394
1535	RP11-545E17.3	RP11-545E17.3	ASO_G0223478_07	55.609	1	47.939	exonic	Cytoplasmic	lncRNA_divergent	7.394
1536	RP11-545E17.3	RP11-545E17.3	ASO_G0223478_AD_01	0	0	5.927	exonic	Cytoplasmic	lncRNA_divergent	7.394
1537	RP11-545E17.3	RP11-545E17.3	ASO_G0223478_AD_06	0	0	45.87	exonic	Cytoplasmic	lncRNA_divergent	7.394
1538	RP11-545E17.3	RP11-545E17.3	ASO_G0223478_AD_07	0	0	38.102	exonic	Cytoplasmic	lncRNA_divergent	7.394
1539	RP11-545E17.3	RP11-545E17.3	ASO_G0223478_AD_08	0	0	19.06	exonic	Cytoplasmic	lncRNA_divergent	7.394
1540	RP11-545E17.3	RP11-545E17.3	ASO_G0223478_AD_09	0	0	12.167	exonic	Cytoplasmic	lncRNA_divergent	7.394
1541	LNCOG	RP11-54A9.1	ASO_G0257219_01	71.81	1	40.265	exonic	Cytoplasmic	lncRNA_intergenic	8.683
1542	LNCOG	RP11-54A9.1	ASO_G0257219_03	7.23	0	25.033	exonic	Cytoplasmic	lncRNA_intergenic	8.683
1543	LNCOG	RP11-54A9.1	ASO_G0257219_07	-15.973	0	34.972	exonic	Cytoplasmic	lncRNA_intergenic	8.683
1544	LNCOG	RP11-54A9.1	ASO_G0257219_09	85.278	1	67.772	exonic	Cytoplasmic	lncRNA_intergenic	8.683
1545	LNCOG	RP11-54A9.1	ASO_G0257219_10	2.502	0	27.431	intronic	Cytoplasmic	lncRNA_intergenic	8.683
1546	LNCOG	RP11-54A9.1	ASO_G0257219_AD_03	48.892	0	-20.018	intronic	Cytoplasmic	lncRNA_intergenic	8.683
1547	LNCOG	RP11-54A9.1	ASO_G0257219_AD_04	81.306	1	84.244	intronic	Cytoplasmic	lncRNA_intergenic	8.683
1548	LNCOG	RP11-54A9.1	ASO_G0257219_AD_05	89.979	1	87.471	intronic	Cytoplasmic	lncRNA_intergenic	8.683
1549	LNCOG	RP11-54A9.1	ASO_G0257219_AD_10	89.605	1	91.703	intronic	Cytoplasmic	lncRNA_intergenic	8.683
1550	RP11-550I24.2	RP11-550I24.2	ASO_G0243176_01	0	0	50.549	exonic	Chromatin bound	lncRNA_antisense	4.842
1551	RP11-550I24.2	RP11-550I24.2	ASO_G0243176_02	0	0	32.675	exonic	Chromatin bound	lncRNA_antisense	4.842
1552	RP11-550I24.2	RP11-550I24.2	ASO_G0243176_04	0	0	43.474	exonic	Chromatin bound	lncRNA_antisense	4.842
1553	RP11-550I24.2	RP11-550I24.2	ASO_G0243176_05	0	0	31.916	exonic	Chromatin bound	lncRNA_antisense	4.842
1554	RP11-550I24.2	RP11-550I24.2	ASO_G0243176_08	0	0	30.063	exonic	Chromatin bound	lncRNA_antisense	4.842
1555	RP11-553K8.5	RP11-553K8.5	ASO_G0261573_01	0	0	53.758	exonic	Nuclear soluble	lncRNA_antisense	1.561
1556	RP11-553K8.5	RP11-553K8.5	ASO_G0261573_02	0	0	58.518	exonic	Nuclear soluble	lncRNA_antisense	1.561
1557	RP11-553K8.5	RP11-553K8.5	ASO_G0261573_03	0	0	56.144	exonic	Nuclear soluble	lncRNA_antisense	1.561
1558	RP11-553K8.5	RP11-553K8.5	ASO_G0261573_04	0	0	7.906	exonic	Nuclear soluble	lncRNA_antisense	1.561
1559	RP11-553K8.5	RP11-553K8.5	ASO_G0261573_08	0	1	37.275	exonic	Nuclear soluble	lncRNA_antisense	1.561
1560	RP11-553K8.5	RP11-553K8.5	ASO_G0261573_AD_01	23.254	0	4.078	intronic	Nuclear soluble	lncRNA_antisense	1.561
1561	RP11-553K8.5	RP11-553K8.5	ASO_G0261573_AD_03	28.621	0	5.087	intronic	Nuclear soluble	lncRNA_antisense	1.561
1562	RP11-553K8.5	RP11-553K8.5	ASO_G0261573_AD_04	60.857	1	84.642	exonic	Nuclear soluble	lncRNA_antisense	1.561
1563	RP11-553K8.5	RP11-553K8.5	ASO_G0261573_AD_05	21.316	0	30.889	exonic	Nuclear soluble	lncRNA_antisense	1.561
1564	RP11-553K8.5	RP11-553K8.5	ASO_G0261573_AD_06	28.808	0	87.385	intronic	Nuclear soluble	lncRNA_antisense	1.561
1565	PIK3CD-AS2	RP11-558F24.4	ASO_G0231789_01	59.576	0	40.558	exonic	Cytoplasmic	lncRNA_divergent	5.412
1566	PIK3CD-AS2	RP11-558F24.4	ASO_G0231789_02	-11.305	0	1.481	exonic	Cytoplasmic	lncRNA_divergent	5.412
1567	PIK3CD-AS2	RP11-558F24.4	ASO_G0231789_07	31.971	0	23.112	exonic	Cytoplasmic	lncRNA_divergent	5.412
1568	PIK3CD-AS2	RP11-558F24.4	ASO_G0231789_08	5.986	0	35.224	exonic	Cytoplasmic	lncRNA_divergent	5.412
1569	PIK3CD-AS2	RP11-558F24.4	ASO_G0231789_09	31.674	0	31.898	exonic	Cytoplasmic	lncRNA_divergent	5.412
1570	ADAMTS7P4	RP11-561C5.5	ASO_G0218052_01	48.27	1	45.133	exonic	Cytoplasmic	pseudogene	6.515
1571	ADAMTS7P4	RP11-561C5.5	ASO_G0218052_02	-0.063	0	30.357	exonic	Cytoplasmic	pseudogene	6.515
1572	ADAMTS7P4	RP11-561C5.5	ASO_G0218052_03	27.954	0	11.806	exonic	Cytoplasmic	pseudogene	6.515
1573	ADAMTS7P4	RP11-561C5.5	ASO_G0218052_05	43.874	0	9.431	exonic	Cytoplasmic	pseudogene	6.515
1574	ADAMTS7P4	RP11-561C5.5	ASO_G0218052_06	15.775	0	27.315	exonic	Cytoplasmic	pseudogene	6.515
1575	PRANCR	RP11-611E13.2	ASO_G0257815_01	95.476	1	83.277	exonic	Cytoplasmic	lncRNA_divergent	2.71
1576	PRANCR	RP11-611E13.2	ASO_G0257815_02	37.601	0	-12.351	exonic	Cytoplasmic	lncRNA_divergent	2.71
1577	PRANCR	RP11-611E13.2	ASO_G0257815_03	32.931	0	-44.768	exonic	Cytoplasmic	lncRNA_divergent	2.71
1578	PRANCR	RP11-611E13.2	ASO_G0257815_04	49.153	1	17.499	exonic	Cytoplasmic	lncRNA_divergent	2.71
1579	PRANCR	RP11-611E13.2	ASO_G0257815_05	1.427	0	15.46	exonic	Cytoplasmic	lncRNA_divergent	2.71
1580	PRANCR	RP11-611E13.2	ASO_G0257815_AD_01	64.2	1	45.688	intronic	Cytoplasmic	lncRNA_divergent	2.71
1581	PRANCR	RP11-611E13.2	ASO_G0257815_AD_03	70.931	1	53.436	exonic	Cytoplasmic	lncRNA_divergent	2.71
1582	PRANCR	RP11-611E13.2	ASO_G0257815_AD_04	9.572	0	9.833	exonic	Cytoplasmic	lncRNA_divergent	2.71
1583	GIHCG	RP11-620J15.3	ASO_G0257698_01	38.796	0	38.213	exonic	Cytoplasmic	lncRNA_divergent	23.757
1584	GIHCG	RP11-620J15.3	ASO_G0257698_03	39.56	0	25.993	exonic	Cytoplasmic	lncRNA_divergent	23.757
1585	GIHCG	RP11-620J15.3	ASO_G0257698_04	44.973	1	44.443	exonic	Cytoplasmic	lncRNA_divergent	23.757
1586	GIHCG	RP11-620J15.3	ASO_G0257698_05	40.308	0	28.481	exonic	Cytoplasmic	lncRNA_divergent	23.757
1587	GIHCG	RP11-620J15.3	ASO_G0257698_07	24.958	0	30.736	exonic	Cytoplasmic	lncRNA_divergent	23.757
1588	NBDY	RP11-622K12.1	ASO_G0204272_01	53.731	1	51.275	exonic	Cytoplasmic	lncRNA_intergenic	38.966
1589	NBDY	RP11-622K12.1	ASO_G0204272_03	85.045	1	71.712	exonic	Cytoplasmic	lncRNA_intergenic	38.966
1590	NBDY	RP11-622K12.1	ASO_G0204272_04	64.938	1	84.372	exonic	Cytoplasmic	lncRNA_intergenic	38.966
1591	NBDY	RP11-622K12.1	ASO_G0204272_05	49.674	1	39.32	exonic	Cytoplasmic	lncRNA_intergenic	38.966
1592	NBDY	RP11-622K12.1	ASO_G0204272_06	27.029	0	37.453	exonic	Cytoplasmic	lncRNA_intergenic	38.966
1593	RP11-656D10.3	RP11-656D10.3	ASO_G0238287_02	84.05	1	56.239	exonic	Chromatin bound	lncRNA_divergent	2.719
1594	RP11-656D10.3	RP11-656D10.3	ASO_G0238287_03	6.394	0	-23.512	exonic	Chromatin bound	lncRNA_divergent	2.719
1595	RP11-656D10.3	RP11-656D10.3	ASO_G0238287_04	54.668	1	20.092	exonic	Chromatin bound	lncRNA_divergent	2.719
1596	RP11-656D10.3	RP11-656D10.3	ASO_G0238287_05	29.587	0	-19.862	exonic	Chromatin bound	lncRNA_divergent	2.719
1597	RP11-656D10.3	RP11-656D10.3	ASO_G0238287_07	6.967	0	-15.623	exonic	Chromatin bound	lncRNA_divergent	2.719
1598	LINC01503	RP11-65J3.1	ASO_G0233901_02	97.516	1	71.984	exonic	Cytoplasmic	lncRNA_intergenic	3.003
1599	LINC01503	RP11-65J3.1	ASO_G0233901_03	81.725	1	52.665	exonic	Cytoplasmic	lncRNA_intergenic	3.003
1600	LINC01503	RP11-65J3.1	ASO_G0233901_04	98.719	1	85.726	exonic	Cytoplasmic	lncRNA_intergenic	3.003
1601	LINC01503	RP11-65J3.1	ASO_G0233901_05	58.313	1	90.075	exonic	Cytoplasmic	lncRNA_intergenic	3.003
1602	LINC01503	RP11-65J3.1	ASO_G0233901_07	14.562	0	16.471	exonic	Cytoplasmic	lncRNA_intergenic	3.003
1603	RP11-660L16.2	RP11-660L16.2	ASO_G0254682_02	47.564	1	55.288	exonic	Nuclear soluble	lncRNA_divergent	10.62
1604	RP11-660L16.2	RP11-660L16.2	ASO_G0254682_03	55.794	1	43.698	exonic	Nuclear soluble	lncRNA_divergent	10.62
1605	RP11-660L16.2	RP11-660L16.2	ASO_G0254682_04	66.457	1	30.096	exonic	Nuclear soluble	lncRNA_divergent	10.62
1606	RP11-660L16.2	RP11-660L16.2	ASO_G0254682_06	38.057	0	54.838	exonic	Nuclear soluble	lncRNA_divergent	10.62
1607	RP11-660L16.2	RP11-660L16.2	ASO_G0254682_09	-15.072	0	25.512	exonic	Nuclear soluble	lncRNA_divergent	10.62
1608	RP11-660L16.2	RP11-660L16.2	ASO_G0254682_AD_01	0	0	1.822	exonic	Nuclear soluble	lncRNA_divergent	10.62
1609	RP11-660L16.2	RP11-660L16.2	ASO_G0254682_AD_04	0	0	27.054	exonic	Nuclear soluble	lncRNA_divergent	10.62
1610	RP11-660L16.2	RP11-660L16.2	ASO_G0254682_AD_07	0	0	-14633.4	exonic	Nuclear soluble	lncRNA_divergent	10.62
1611	RP11-660L16.2	RP11-660L16.2	ASO_G0254682_AD_09	0	0	21.786	exonic	Nuclear soluble	lncRNA_divergent	10.62
1612	RP11-660L16.2	RP11-660L16.2	ASO_G0254682_AD_10	0	0	41.304	exonic	Nuclear soluble	lncRNA_divergent	10.62
1613	GACAT2	RP11-674N23.1	ASO_G0265962_01	61.793	1	25.703	exonic	Cytoplasmic	lncRNA_divergent	0.606
1614	GACAT2	RP11-674N23.1	ASO_G0265962_02	65.987	1	-11.88	exonic	Cytoplasmic	lncRNA_divergent	0.606
1615	GACAT2	RP11-674N23.1	ASO_G0265962_04	63.901	1	34.782	exonic	Cytoplasmic	lncRNA_divergent	0.606
1616	GACAT2	RP11-674N23.1	ASO_G0265962_05	63.595	1	30.419	exonic	Cytoplasmic	lncRNA_divergent	0.606
1617	GACAT2	RP11-674N23.1	ASO_G0265962_06	54.476	1	15.49	exonic	Cytoplasmic	lncRNA_divergent	0.606
1618	CASP4LP	RP11-693N9.2	ASO_G0235505_01	57.249	1	74.097	exonic	Cytoplasmic	pseudogene	1.848
1619	CASP4LP	RP11-693N9.2	ASO_G0235505_02	21.241	0	20.887	exonic	Cytoplasmic	pseudogene	1.848
1620	CASP4LP	RP11-693N9.2	ASO_G0235505_03	20.773	0	39.369	exonic	Cytoplasmic	pseudogene	1.848
1621	CASP4LP	RP11-693N9.2	ASO_G0235505_04	-19.909	0	24.871	exonic	Cytoplasmic	pseudogene	1.848
1622	CASP4LP	RP11-693N9.2	ASO_G0235505_10	14.17	0	42.4	exonic	Cytoplasmic	pseudogene	1.848
1623	CASP4LP	RP11-693N9.2	ASO_G0235505_AD_01	0	0	15.181	intronic	Cytoplasmic	pseudogene	1.848
1624	CASP4LP	RP11-693N9.2	ASO_G0235505_AD_02	0	0	33.667	intronic	Cytoplasmic	pseudogene	1.848
1625	CASP4LP	RP11-693N9.2	ASO_G0235505_AD_06	0	0	36.924	intronic	Cytoplasmic	pseudogene	1.848
1626	CASP4LP	RP11-693N9.2	ASO_G0235505_AD_08	0	0	35.241	intronic	Cytoplasmic	pseudogene	1.848
1627	CASP4LP	RP11-693N9.2	ASO_G0235505_AD_10	0	0	51.699	intronic	Cytoplasmic	pseudogene	1.848
1628	RP11-6N17.4	RP11-6N17.4	ASO_G0264920_01	40.978	0	19.594	exonic	Cytoplasmic	lncRNA_divergent	3.632
1629	RP11-6N17.4	RP11-6N17.4	ASO_G0264920_03	23.356	0	14.476	exonic	Cytoplasmic	lncRNA_divergent	3.632
1630	RP11-6N17.4	RP11-6N17.4	ASO_G0264920_06	44.574	0	75.476	exonic	Cytoplasmic	lncRNA_divergent	3.632
1631	RP11-6N17.4	RP11-6N17.4	ASO_G0264920_07	22.467	0	5.322	exonic	Cytoplasmic	lncRNA_divergent	3.632
1632	RP11-6N17.4	RP11-6N17.4	ASO_G0264920_08	51.133	0	22.529	exonic	Cytoplasmic	lncRNA_divergent	3.632
1633	RP11-6N17.4	RP11-6N17.4	ASO_G0264920_AD_02	0	1	76.559	exonic	Cytoplasmic	lncRNA_divergent	3.632
1634	RP11-6N17.4	RP11-6N17.4	ASO_G0264920_AD_03	0	0	23.718	exonic	Cytoplasmic	lncRNA_divergent	3.632
1635	RP11-6N17.4	RP11-6N17.4	ASO_G0264920_AD_04	0	0	49.252	exonic	Cytoplasmic	lncRNA_divergent	3.632
1636	RP11-6N17.4	RP11-6N17.4	ASO_G0264920_AD_05	0	0	-4.343	exonic	Cytoplasmic	lncRNA_divergent	3.632
1637	RP11-6N17.4	RP11-6N17.4	ASO_G0264920_AD_06	0	0	65.764	exonic	Cytoplasmic	lncRNA_divergent	3.632
1638	RP11-727A23.5	RP11-727A23.5	ASO_G0247137_01	48.662	0	24.125	exonic	Chromatin bound	lncRNA_divergent	4.929
1639	RP11-727A23.5	RP11-727A23.5	ASO_G0247137_03	86.261	1	-1.381	exonic	Chromatin bound	lncRNA_divergent	4.929
1640	RP11-727A23.5	RP11-727A23.5	ASO_G0247137_04	76.585	1	8.371	exonic	Chromatin bound	lncRNA_divergent	4.929
1641	RP11-727A23.5	RP11-727A23.5	ASO_G0247137_05	76.289	1	35.625	exonic	Chromatin bound	lncRNA_divergent	4.929
1642	RP11-727A23.5	RP11-727A23.5	ASO_G0247137_09	52.174	0	24.284	exonic	Chromatin bound	lncRNA_divergent	4.929
1643	TMC3-AS1	RP11-761I4.3	ASO_G0259343_01	1.505	0	54.303	exonic	Cytoplasmic	lncRNA_divergent	3.277
1644	TMC3-AS1	RP11-761I4.3	ASO_G0259343_04	22.094	0	22.172	exonic	Cytoplasmic	lncRNA_divergent	3.277
1645	TMC3-AS1	RP11-761I4.3	ASO_G0259343_05	28.201	0	38.952	exonic	Cytoplasmic	lncRNA_divergent	3.277
1646	TMC3-AS1	RP11-761I4.3	ASO_G0259343_06	48.443	0	44.244	exonic	Cytoplasmic	lncRNA_divergent	3.277
1647	TMC3-AS1	RP11-761I4.3	ASO_G0259343_09	-2.866	0	34.192	exonic	Cytoplasmic	lncRNA_divergent	3.277
1648	FRG1JP	RP11-764K9.4	ASO_G0215548_01	31.017	0	13.164	exonic	Cytoplasmic	pseudogene	5.061
1649	FRG1JP	RP11-764K9.4	ASO_G0215548_03	8.739	0	8.998	exonic	Cytoplasmic	pseudogene	5.061
1650	FRG1JP	RP11-764K9.4	ASO_G0215548_04	44.364	0	41.223	exonic	Cytoplasmic	pseudogene	5.061
1651	FRG1JP	RP11-764K9.4	ASO_G0215548_05	0	0	0	exonic	Cytoplasmic	pseudogene	5.061
1652	PPP1R14B-AS1	RP11-783K16.5	ASO_G0256940_01	35.482	0	-6.172	exonic	Cytoplasmic	lncRNA_divergent	26.763
1653	PPP1R14B-AS1	RP11-783K16.5	ASO_G0256940_02	32.862	0	-7.048	exonic	Cytoplasmic	lncRNA_divergent	26.763
1654	PPP1R14B-AS1	RP11-783K16.5	ASO_G0256940_03	52.978	1	49.719	exonic	Cytoplasmic	lncRNA_divergent	26.763
1655	PPP1R14B-AS1	RP11-783K16.5	ASO_G0256940_04	74.51	1	45.185	exonic	Cytoplasmic	lncRNA_divergent	26.763
1656	PPP1R14B-AS1	RP11-783K16.5	ASO_G0256940_09	37.568	0	18.286	exonic	Cytoplasmic	lncRNA_divergent	26.763
1657	LINC02381	RP11-834C11.4	ASO_G0250742_01	25.383	0	55.469	exonic	Cytoplasmic	lncRNA_intergenic	14.189
1658	LINC02381	RP11-834C11.4	ASO_G0250742_02	26.242	0	-8.651	exonic	Cytoplasmic	lncRNA_intergenic	14.189
1659	LINC02381	RP11-834C11.4	ASO_G0250742_03	27.67	0	-4.415	exonic	Cytoplasmic	lncRNA_intergenic	14.189
1660	LINC02381	RP11-834C11.4	ASO_G0250742_04	29.882	0	9.999	exonic	Cytoplasmic	lncRNA_intergenic	14.189
1661	LINC02381	RP11-834C11.4	ASO_G0250742_05	59.279	1	29.991	exonic	Cytoplasmic	lncRNA_intergenic	14.189
1662	LINC02381	RP11-834C11.4	ASO_G0250742_AD_01	-1.238	0	11.108	intronic	Cytoplasmic	lncRNA_intergenic	14.189
1663	LINC02381	RP11-834C11.4	ASO_G0250742_AD_02	11.139	0	39.613	intronic	Cytoplasmic	lncRNA_intergenic	14.189
1664	LINC02381	RP11-834C11.4	ASO_G0250742_AD_04	81.666	1	71.353	exonic	Cytoplasmic	lncRNA_intergenic	14.189
1665	LINC02381	RP11-834C11.4	ASO_G0250742_AD_05	79.939	1	69.513	exonic	Cytoplasmic	lncRNA_intergenic	14.189
1666	LINC02381	RP11-834C11.4	ASO_G0250742_AD_09	37.044	0	50.376	exonic	Cytoplasmic	lncRNA_intergenic	14.189
1667	SRP54-AS1	RP11-85K15.2	ASO_G0258704_01	59.157	0	21.947	exonic	Chromatin bound	lncRNA_divergent	7.967
1668	SRP54-AS1	RP11-85K15.2	ASO_G0258704_03	50.446	0	47.55	exonic	Chromatin bound	lncRNA_divergent	7.967
1669	SRP54-AS1	RP11-85K15.2	ASO_G0258704_04	76.083	1	35.501	exonic	Chromatin bound	lncRNA_divergent	7.967
1670	SRP54-AS1	RP11-85K15.2	ASO_G0258704_05	37.796	0	15.493	exonic	Chromatin bound	lncRNA_divergent	7.967
1671	SRP54-AS1	RP11-85K15.2	ASO_G0258704_09	85.69	1	78.179	exonic	Chromatin bound	lncRNA_divergent	7.967
1672	SRP54-AS1	RP11-85K15.2	ASO_G0258704_AD_01	56.25	0	47.78	exonic	Chromatin bound	lncRNA_divergent	7.967
1673	SRP54-AS1	RP11-85K15.2	ASO_G0258704_AD_02	49.706	0	12.864	exonic	Chromatin bound	lncRNA_divergent	7.967
1674	SRP54-AS1	RP11-85K15.2	ASO_G0258704_AD_04	72.383	1	30.801	exonic	Chromatin bound	lncRNA_divergent	7.967
1675	SRP54-AS1	RP11-85K15.2	ASO_G0258704_AD_06	77.598	1	53.653	exonic	Chromatin bound	lncRNA_divergent	7.967
1676	SRP54-AS1	RP11-85K15.2	ASO_G0258704_AD_07	82.575	1	54.319	exonic	Chromatin bound	lncRNA_divergent	7.967
1677	RP11-863P13.3	RP11-863P13.3	ASO_G0261327_01	23.858	0	27.886	exonic	Nuclear soluble	lncRNA_intergenic	2.163
1678	RP11-863P13.3	RP11-863P13.3	ASO_G0261327_02	44.788	1	39.557	exonic	Nuclear soluble	lncRNA_intergenic	2.163
1679	RP11-863P13.3	RP11-863P13.3	ASO_G0261327_05	87.099	1	57.153	exonic	Nuclear soluble	lncRNA_intergenic	2.163
1680	RP11-863P13.3	RP11-863P13.3	ASO_G0261327_09	66.768	1	12.035	exonic	Nuclear soluble	lncRNA_intergenic	2.163
1681	RP11-863P13.3	RP11-863P13.3	ASO_G0261327_10	55.828	1	21.668	exonic	Nuclear soluble	lncRNA_intergenic	2.163
1682	RP11-863P13.3	RP11-863P13.3	ASO_G0261327_AD_04	47.393	0	16.054	exonic	Nuclear soluble	lncRNA_intergenic	2.163
1683	RP11-863P13.3	RP11-863P13.3	ASO_G0261327_AD_05	63.497	1	9.648	exonic	Nuclear soluble	lncRNA_intergenic	2.163
1684	RP11-863P13.3	RP11-863P13.3	ASO_G0261327_AD_06	47.019	1	49.066	exonic	Nuclear soluble	lncRNA_intergenic	2.163
1685	RP11-863P13.3	RP11-863P13.3	ASO_G0261327_AD_07	60.963	1	31.347	exonic	Nuclear soluble	lncRNA_intergenic	2.163
1686	RP11-863P13.3	RP11-863P13.3	ASO_G0261327_AD_10	33.289	0	24.86	exonic	Nuclear soluble	lncRNA_intergenic	2.163
1687	RP11-879F14.2	RP11-879F14.2	ASO_G0267279_01	66.227	1	34.396	exonic	Chromatin bound	lncRNA_sense_intronic	12.063
1688	RP11-879F14.2	RP11-879F14.2	ASO_G0267279_04	21.538	0	-1.693	exonic	Chromatin bound	lncRNA_sense_intronic	12.063
1689	RP11-879F14.2	RP11-879F14.2	ASO_G0267279_05	21.718	0	14.364	exonic	Chromatin bound	lncRNA_sense_intronic	12.063
1690	RP11-879F14.2	RP11-879F14.2	ASO_G0267279_06	41.028	0	17.243	exonic	Chromatin bound	lncRNA_sense_intronic	12.063
1691	RP11-879F14.2	RP11-879F14.2	ASO_G0267279_07	20.588	0	21.578	exonic	Chromatin bound	lncRNA_sense_intronic	12.063
1692	LINC01569	RP11-95P2.1	ASO_G0262468_01	42.506	0	55.665	exonic	Nuclear soluble	lncRNA_intergenic	1.559
1693	LINC01569	RP11-95P2.1	ASO_G0262468_02	43.187	1	76.887	exonic	Nuclear soluble	lncRNA_intergenic	1.559
1694	LINC01569	RP11-95P2.1	ASO_G0262468_04	51.248	0	60.234	exonic	Nuclear soluble	lncRNA_intergenic	1.559
1695	LINC01569	RP11-95P2.1	ASO_G0262468_05	9.448	0	12.839	exonic	Nuclear soluble	lncRNA_intergenic	1.559
1696	LINC01569	RP11-95P2.1	ASO_G0262468_07	37.62	0	54.317	exonic	Nuclear soluble	lncRNA_intergenic	1.559
1697	LINC01569	RP11-95P2.1	ASO_G0262468_AD_02	59.661	1	40.378	exonic	Nuclear soluble	lncRNA_intergenic	1.559
1698	LINC01569	RP11-95P2.1	ASO_G0262468_AD_03	83.044	1	-22.136	exonic	Nuclear soluble	lncRNA_intergenic	1.559
1699	LINC01569	RP11-95P2.1	ASO_G0262468_AD_04	65.954	1	-43.632	exonic	Nuclear soluble	lncRNA_intergenic	1.559
1700	LINC01569	RP11-95P2.1	ASO_G0262468_AD_05	89.696	1	52.101	exonic	Nuclear soluble	lncRNA_intergenic	1.559
1701	LINC01569	RP11-95P2.1	ASO_G0262468_AD_07	88.128	1	35.065	exonic	Nuclear soluble	lncRNA_intergenic	1.559
1702	RP11-977G19.11	RP11-977G19.11	ASO_G0257303_02	30.494	0	28.776	exonic	Chromatin bound	lncRNA_divergent	4.991
1703	RP11-977G19.11	RP11-977G19.11	ASO_G0257303_03	13.067	0	19.668	exonic	Chromatin bound	lncRNA_divergent	4.991
1704	RP11-977G19.11	RP11-977G19.11	ASO_G0257303_04	54.595	0	54.748	exonic	Chromatin bound	lncRNA_divergent	4.991
1705	RP11-977G19.11	RP11-977G19.11	ASO_G0257303_06	2.679	0	13.452	exonic	Chromatin bound	lncRNA_divergent	4.991
1706	RP11-977G19.11	RP11-977G19.11	ASO_G0257303_08	41.734	0	34.434	exonic	Chromatin bound	lncRNA_divergent	4.991
1707	RP13-20L14.6	RP13-20L14.6	ASO_G0265458_01	33.041	0	21.652	exonic	Cytoplasmic	lncRNA_divergent	1.411
1708	RP13-20L14.6	RP13-20L14.6	ASO_G0265458_02	33.459	0	20.141	exonic	Cytoplasmic	lncRNA_divergent	1.411
1709	RP13-20L14.6	RP13-20L14.6	ASO_G0265458_07	63.805	1	51.84	exonic	Cytoplasmic	lncRNA_divergent	1.411
1710	RP13-20L14.6	RP13-20L14.6	ASO_G0265458_09	40.106	0	35.925	exonic	Cytoplasmic	lncRNA_divergent	1.411
1711	RP13-20L14.6	RP13-20L14.6	ASO_G0265458_10	61.726	1	56.798	exonic	Cytoplasmic	lncRNA_divergent	1.411
1712	RP13-20L14.6	RP13-20L14.6	ASO_G0265458_AD_01	10.796	0	7.072	exonic	Cytoplasmic	lncRNA_divergent	1.411
1713	RP13-20L14.6	RP13-20L14.6	ASO_G0265458_AD_03	71.744	1	74.296	intronic	Cytoplasmic	lncRNA_divergent	1.411
1714	RP13-20L14.6	RP13-20L14.6	ASO_G0265458_AD_06	42.747	0	30.163	exonic	Cytoplasmic	lncRNA_divergent	1.411
1715	RP13-20L14.6	RP13-20L14.6	ASO_G0265458_AD_07	63.635	1	11.766	exonic	Cytoplasmic	lncRNA_divergent	1.411
1716	RP13-20L14.6	RP13-20L14.6	ASO_G0265458_AD_08	6.368	0	-8.315	exonic	Cytoplasmic	lncRNA_divergent	1.411
1717	LASTR	RP13-463N16.6	ASO_G0242147_01	70.598	1	35.962	exonic	Cytoplasmic	lncRNA_intergenic	4.549
1718	LASTR	RP13-463N16.6	ASO_G0242147_05	72.73	1	77.561	exonic	Cytoplasmic	lncRNA_intergenic	4.549
1719	LASTR	RP13-463N16.6	ASO_G0242147_07	48.466	1	78.139	exonic	Cytoplasmic	lncRNA_intergenic	4.549
1720	LASTR	RP13-463N16.6	ASO_G0242147_08	-49.019	0	12.617	exonic	Cytoplasmic	lncRNA_intergenic	4.549
1721	MINCR	RP13-582O9.5	ASO_G0253716_01	28.282	0	17.071	exonic	Nuclear soluble	lncRNA_divergent	6.165
1722	MINCR	RP13-582O9.5	ASO_G0253716_04	-20.737	0	13.99	exonic	Nuclear soluble	lncRNA_divergent	6.165
1723	MINCR	RP13-582O9.5	ASO_G0253716_06	34.87	0	10.358	exonic	Nuclear soluble	lncRNA_divergent	6.165
1724	MINCR	RP13-582O9.5	ASO_G0253716_07	50.127	0	27.381	exonic	Nuclear soluble	lncRNA_divergent	6.165
1725	TPTEP2	RP3-449O17.1	ASO_G0244627_01	33.408	0	44.405	exonic	Chromatin bound	pseudogene	20.043
1726	TPTEP2	RP3-449O17.1	ASO_G0244627_03	32.492	0	33.472	exonic	Chromatin bound	pseudogene	20.043
1727	TPTEP2	RP3-449O17.1	ASO_G0244627_05	46.211	0	35.765	exonic	Chromatin bound	pseudogene	20.043
1728	TPTEP2	RP3-449O17.1	ASO_G0244627_06	29.071	0	4.273	exonic	Chromatin bound	pseudogene	20.043
1729	TPTEP2	RP3-449O17.1	ASO_G0244627_08	45.833	1	29.513	exonic	Chromatin bound	pseudogene	20.043
1730	MIR34AHG	RP3-510D11.1	ASO_G0228526_01	45.96	0	-10.188	exonic	Chromatin bound	lncRNA_intergenic	2.822
1731	MIR34AHG	RP3-510D11.1	ASO_G0228526_02	45.589	0	4.27	exonic	Chromatin bound	lncRNA_intergenic	2.822
1732	MIR34AHG	RP3-510D11.1	ASO_G0228526_03	57.165	0	10.945	exonic	Chromatin bound	lncRNA_intergenic	2.822
1733	MIR34AHG	RP3-510D11.1	ASO_G0228526_06	64.557	1	-11.183	exonic	Chromatin bound	lncRNA_intergenic	2.822
1734	MIR34AHG	RP3-510D11.1	ASO_G0228526_10	63.246	1	65.959	exonic	Chromatin bound	lncRNA_intergenic	2.822
1735	MIR34AHG	RP3-510D11.1	ASO_G0228526_AD_01	17.506	0	-23.838	intronic	Chromatin bound	lncRNA_intergenic	2.822
1736	MIR34AHG	RP3-510D11.1	ASO_G0228526_AD_03	-20.206	0	-56.42	exonic	Chromatin bound	lncRNA_intergenic	2.822
1737	MIR34AHG	RP3-510D11.1	ASO_G0228526_AD_04	-14.867	0	-61.794	exonic	Chromatin bound	lncRNA_intergenic	2.822
1738	MIR34AHG	RP3-510D11.1	ASO_G0228526_AD_05	60.453	1	37.441	exonic	Chromatin bound	lncRNA_intergenic	2.822
1739	MIR34AHG	RP3-510D11.1	ASO_G0228526_AD_10	-22.514	0	3.779	exonic	Chromatin bound	lncRNA_intergenic	2.822
1740	LNCTAM34A	RP3-510D11.2	ASO_G0234546_01	86.1	1	67.037	exonic	Chromatin bound	lncRNA_divergent	3.505
1741	LNCTAM34A	RP3-510D11.2	ASO_G0234546_02	95.291	1	81.73	exonic	Chromatin bound	lncRNA_divergent	3.505
1742	LNCTAM34A	RP3-510D11.2	ASO_G0234546_03	76.285	1	35.855	exonic	Chromatin bound	lncRNA_divergent	3.505
1743	LNCTAM34A	RP3-510D11.2	ASO_G0234546_05	6.162	0	26.831	exonic	Chromatin bound	lncRNA_divergent	3.505
1744	LNCTAM34A	RP3-510D11.2	ASO_G0234546_07	25.512	0	70.013	exonic	Chromatin bound	lncRNA_divergent	3.505
1745	LNCTAM34A	RP3-510D11.2	ASO_G0234546_AD_04	12.89	0	65.58	exonic	Chromatin bound	lncRNA_divergent	3.505
1746	LNCTAM34A	RP3-510D11.2	ASO_G0234546_AD_05	-2.573	0	60.456	exonic	Chromatin bound	lncRNA_divergent	3.505
1747	LNCTAM34A	RP3-510D11.2	ASO_G0234546_AD_06	23.03	0	61.146	exonic	Chromatin bound	lncRNA_divergent	3.505
1748	LNCTAM34A	RP3-510D11.2	ASO_G0234546_AD_07	0.186	0	0	exonic	Chromatin bound	lncRNA_divergent	3.505
1749	LNCTAM34A	RP3-510D11.2	ASO_G0234546_AD_09	11.902	0	85.419	exonic	Chromatin bound	lncRNA_divergent	3.505
1750	LINC01357	RP3-522D1.1	ASO_G0224167_01	64.281	1	25.714	exonic	Chromatin bound	lncRNA_intergenic	0.88
1751	LINC01357	RP3-522D1.1	ASO_G0224167_04	-7.11	0	17.613	exonic	Chromatin bound	lncRNA_intergenic	0.88
1752	LINC01357	RP3-522D1.1	ASO_G0224167_05	48.108	0	16.9	exonic	Chromatin bound	lncRNA_intergenic	0.88
1753	LINC01357	RP3-522D1.1	ASO_G0224167_06	34.15	0	8.362	exonic	Chromatin bound	lncRNA_intergenic	0.88
1754	LINC01357	RP3-522D1.1	ASO_G0224167_09	63.26	1	25.557	exonic	Chromatin bound	lncRNA_intergenic	0.88
1755	ZNF337-AS1	RP4-694B14.5	ASO_G0213742_01	84.264	1	39.949	exonic	Chromatin bound	lncRNA_divergent	3.175
1756	ZNF337-AS1	RP4-694B14.5	ASO_G0213742_02	65.84	1	22.433	exonic	Chromatin bound	lncRNA_divergent	3.175
1757	ZNF337-AS1	RP4-694B14.5	ASO_G0213742_05	20.114	0	16.025	exonic	Chromatin bound	lncRNA_divergent	3.175
1758	ZNF337-AS1	RP4-694B14.5	ASO_G0213742_06	59.005	0	46.612	exonic	Chromatin bound	lncRNA_divergent	3.175
1759	ZNF337-AS1	RP4-694B14.5	ASO_G0213742_08	30.39	0	6.304	exonic	Chromatin bound	lncRNA_divergent	3.175
1760	INKA2-AS1	RP4-773A18.4	ASO_G0227811_01	42.619	0	15.027	exonic	Cytoplasmic	lncRNA_divergent	2.434
1761	INKA2-AS1	RP4-773A18.4	ASO_G0227811_02	64.501	1	53.504	exonic	Cytoplasmic	lncRNA_divergent	2.434
1762	INKA2-AS1	RP4-773A18.4	ASO_G0227811_05	40.654	0	33.162	exonic	Cytoplasmic	lncRNA_divergent	2.434
1763	INKA2-AS1	RP4-773A18.4	ASO_G0227811_06	82.26	1	59.596	exonic	Cytoplasmic	lncRNA_divergent	2.434
1764	INKA2-AS1	RP4-773A18.4	ASO_G0227811_10	47.338	0	16.823	exonic	Cytoplasmic	lncRNA_divergent	2.434
1765	INKA2-AS1	RP4-773A18.4	ASO_G0227811_AD_01	30.888	0	13.754	exonic	Cytoplasmic	lncRNA_divergent	2.434
1766	INKA2-AS1	RP4-773A18.4	ASO_G0227811_AD_03	-16.771	0	13.376	intronic	Cytoplasmic	lncRNA_divergent	2.434
1767	INKA2-AS1	RP4-773A18.4	ASO_G0227811_AD_04	7.557	0	-5.817	exonic	Cytoplasmic	lncRNA_divergent	2.434
1768	INKA2-AS1	RP4-773A18.4	ASO_G0227811_AD_05	-4.611	0	2.498	intronic	Cytoplasmic	lncRNA_divergent	2.434
1769	INKA2-AS1	RP4-773A18.4	ASO_G0227811_AD_08	34.067	0	14.281	intronic	Cytoplasmic	lncRNA_divergent	2.434
1770	RP4-794H19.4	RP4-794H19.4	ASO_G0230812_01	25.435	0	29.784	exonic	Chromatin bound	lncRNA_intergenic	1.07
1771	RP4-794H19.4	RP4-794H19.4	ASO_G0230812_02	0	0	18.207	exonic	Chromatin bound	lncRNA_intergenic	1.07
1772	RP4-794H19.4	RP4-794H19.4	ASO_G0230812_05	0	0	63.006	exonic	Chromatin bound	lncRNA_intergenic	1.07
1773	RP4-794H19.4	RP4-794H19.4	ASO_G0230812_07	0	0	29.667	exonic	Chromatin bound	lncRNA_intergenic	1.07
1774	RP4-794H19.4	RP4-794H19.4	ASO_G0230812_10	41.032	0	54.823	exonic	Chromatin bound	lncRNA_intergenic	1.07
1775	RP5-1050D4.5	RP5-1050D4.5	ASO_G0262227_01	76.764	1	67.636	exonic	Nuclear soluble	lncRNA_divergent	8.705
1776	RP5-1050D4.5	RP5-1050D4.5	ASO_G0262227_04	58.026	1	21.819	exonic	Nuclear soluble	lncRNA_divergent	8.705
1777	RP5-1050D4.5	RP5-1050D4.5	ASO_G0262227_07	2.706	0	10.865	exonic	Nuclear soluble	lncRNA_divergent	8.705
1778	RP5-1050D4.5	RP5-1050D4.5	ASO_G0262227_09	-119.191	0	34.029	exonic	Nuclear soluble	lncRNA_divergent	8.705
1779	RP5-1050D4.5	RP5-1050D4.5	ASO_G0262227_10	0.096	0	34.287	exonic	Nuclear soluble	lncRNA_divergent	8.705
1780	NRSN2-AS1	RP5-1103G7.4	ASO_G0225377_05	95.026	1	97.319	exonic	Chromatin bound	lncRNA_divergent	9.864
1781	NRSN2-AS1	RP5-1103G7.4	ASO_G0225377_06	52.098	0	38.595	exonic	Chromatin bound	lncRNA_divergent	9.864
1782	NRSN2-AS1	RP5-1103G7.4	ASO_G0225377_07	17.449	0	8.741	exonic	Chromatin bound	lncRNA_divergent	9.864
1783	NRSN2-AS1	RP5-1103G7.4	ASO_G0225377_08	36.902	0	34.046	exonic	Chromatin bound	lncRNA_divergent	9.864
1784	NRSN2-AS1	RP5-1103G7.4	ASO_G0225377_AD_05	83.074	1	52.198	exonic	Chromatin bound	lncRNA_divergent	9.864
1785	NRSN2-AS1	RP5-1103G7.4	ASO_G0225377_AD_06	52.889	1	10.185	exonic	Chromatin bound	lncRNA_divergent	9.864
1786	NRSN2-AS1	RP5-1103G7.4	ASO_G0225377_AD_08	63.948	1	19.528	exonic	Chromatin bound	lncRNA_divergent	9.864
1787	NRSN2-AS1	RP5-1103G7.4	ASO_G0225377_AD_09	26.172	0	-0.091	exonic	Chromatin bound	lncRNA_divergent	9.864
1788	NRSN2-AS1	RP5-1103G7.4	ASO_G0225377_AD_10	64.965	1	2.683	exonic	Chromatin bound	lncRNA_divergent	9.864
1789	ELOA-AS1	RP5-886K2.3	ASO_G0236810_01	54.732	1	19.639	exonic	Chromatin bound	lncRNA_divergent	3.065
1790	ELOA-AS1	RP5-886K2.3	ASO_G0236810_02	19.881	0	24.233	exonic	Chromatin bound	lncRNA_divergent	3.065
1791	ELOA-AS1	RP5-886K2.3	ASO_G0236810_04	37.834	0	27.545	exonic	Chromatin bound	lncRNA_divergent	3.065
1792	ELOA-AS1	RP5-886K2.3	ASO_G0236810_07	-7.83	0	10.871	exonic	Chromatin bound	lncRNA_divergent	3.065
1793	ELOA-AS1	RP5-886K2.3	ASO_G0236810_09	-18.988	0	56.226	exonic	Chromatin bound	lncRNA_divergent	3.065
1794	ELOA-AS1	RP5-886K2.3	ASO_G0236810_AD_02	94.623	1	61.158	exonic	Chromatin bound	lncRNA_divergent	3.065
1795	ELOA-AS1	RP5-886K2.3	ASO_G0236810_AD_03	71.284	1	27.186	exonic	Chromatin bound	lncRNA_divergent	3.065
1796	ELOA-AS1	RP5-886K2.3	ASO_G0236810_AD_06	97.058	1	67.066	exonic	Chromatin bound	lncRNA_divergent	3.065
1797	ELOA-AS1	RP5-886K2.3	ASO_G0236810_AD_07	79.157	1	42.483	exonic	Chromatin bound	lncRNA_divergent	3.065
1798	ELOA-AS1	RP5-886K2.3	ASO_G0236810_AD_09	78.442	1	4.645	exonic	Chromatin bound	lncRNA_divergent	3.065
1799	PRR34-AS1	RP6-109B7.3	ASO_G0241990_01	88.3	1	61.502	exonic	Chromatin bound	lncRNA_divergent	33.57
1800	PRR34-AS1	RP6-109B7.3	ASO_G0241990_05	31.95	0	1.604	exonic	Chromatin bound	lncRNA_divergent	33.57
1801	PRR34-AS1	RP6-109B7.3	ASO_G0241990_06	-14.949	0	56.115	exonic	Chromatin bound	lncRNA_divergent	33.57
1802	PRR34-AS1	RP6-109B7.3	ASO_G0241990_07	14.392	0	55.341	exonic	Chromatin bound	lncRNA_divergent	33.57
1803	PRR34-AS1	RP6-109B7.3	ASO_G0241990_10	5.504	0	30.472	exonic	Chromatin bound	lncRNA_divergent	33.57
1804	MIR222HG	RP6-99M1.2	ASO_G0270069_01	40.993	0	14.655	exonic	Chromatin bound	lncRNA_intergenic	97.041
1805	MIR222HG	RP6-99M1.2	ASO_G0270069_02	30.696	0	18.749	exonic	Chromatin bound	lncRNA_intergenic	97.041
1806	MIR222HG	RP6-99M1.2	ASO_G0270069_03	-11.465	0	30.736	exonic	Chromatin bound	lncRNA_intergenic	97.041
1807	MIR222HG	RP6-99M1.2	ASO_G0270069_04	11.676	0	17.132	exonic	Chromatin bound	lncRNA_intergenic	97.041
1808	MIR222HG	RP6-99M1.2	ASO_G0270069_05	85.985	1	73.937	exonic	Chromatin bound	lncRNA_intergenic	97.041
1809	MIR222HG	RP6-99M1.2	ASO_G0270069_AD_01	65.321	1	52.211	exonic	Chromatin bound	lncRNA_intergenic	97.041
1810	MIR222HG	RP6-99M1.2	ASO_G0270069_AD_02	50.281	1	23.152	exonic	Chromatin bound	lncRNA_intergenic	97.041
1811	MIR222HG	RP6-99M1.2	ASO_G0270069_AD_03	8.44	0	17.572	exonic	Chromatin bound	lncRNA_intergenic	97.041
1812	MIR222HG	RP6-99M1.2	ASO_G0270069_AD_07	40.795	0	62.205	exonic	Chromatin bound	lncRNA_intergenic	97.041
1813	MIR222HG	RP6-99M1.2	ASO_G0270069_AD_09	40.08	0	3.522	exonic	Chromatin bound	lncRNA_intergenic	97.041
1814	APTR	RSBN1L-AS1	ASO_G0214293_01	83.013	1	32.984	exonic	Chromatin bound	lncRNA_divergent	5.452
1815	APTR	RSBN1L-AS1	ASO_G0214293_02	78.738	1	23.464	exonic	Chromatin bound	lncRNA_divergent	5.452
1816	APTR	RSBN1L-AS1	ASO_G0214293_03	67.094	1	31.149	exonic	Chromatin bound	lncRNA_divergent	5.452
1817	APTR	RSBN1L-AS1	ASO_G0214293_04	89.119	1	31.734	exonic	Chromatin bound	lncRNA_divergent	5.452
1818	APTR	RSBN1L-AS1	ASO_G0214293_05	54.91	0	7.621	exonic	Chromatin bound	lncRNA_divergent	5.452
1819	SBF2-AS1	SBF2-AS1	ASO_G0246273_01	28.074	0	29.681	exonic	Cytoplasmic	lncRNA_antisense	29.079
1820	SBF2-AS1	SBF2-AS1	ASO_G0246273_02	95.606	1	87.048	exonic	Cytoplasmic	lncRNA_antisense	29.079
1821	SBF2-AS1	SBF2-AS1	ASO_G0246273_05	54.951	1	40.1	exonic	Cytoplasmic	lncRNA_antisense	29.079
1822	SBF2-AS1	SBF2-AS1	ASO_G0246273_08	15.58	0	23.385	exonic	Cytoplasmic	lncRNA_antisense	29.079
1823	SBF2-AS1	SBF2-AS1	ASO_G0246273_AD_01	27.899	0	24.357	intronic	Cytoplasmic	lncRNA_antisense	29.079
1824	SBF2-AS1	SBF2-AS1	ASO_G0246273_AD_02	29.295	0	31.925	intronic	Cytoplasmic	lncRNA_antisense	29.079
1825	SBF2-AS1	SBF2-AS1	ASO_G0246273_AD_06	26.173	0	25.696	intronic	Cytoplasmic	lncRNA_antisense	29.079
1826	SBF2-AS1	SBF2-AS1	ASO_G0246273_AD_08	83.226	1	24.614	exonic	Cytoplasmic	lncRNA_antisense	29.079
1827	SBF2-AS1	SBF2-AS1	ASO_G0246273_AD_09	81.962	1	27.249	intronic	Cytoplasmic	lncRNA_antisense	29.079
1828	SERTAD4-AS1	SERTAD4-AS1	ASO_G0203706_01	96.287	1	-48.238	exonic	Cytoplasmic	lncRNA_intergenic	30.38
1829	SERTAD4-AS1	SERTAD4-AS1	ASO_G0203706_02	57.248	0	39.71	exonic	Cytoplasmic	lncRNA_intergenic	30.38
1830	SERTAD4-AS1	SERTAD4-AS1	ASO_G0203706_03	40.466	0	9.09	exonic	Cytoplasmic	lncRNA_intergenic	30.38
1831	SERTAD4-AS1	SERTAD4-AS1	ASO_G0203706_04	61.41	1	10.599	exonic	Cytoplasmic	lncRNA_intergenic	30.38
1832	SERTAD4-AS1	SERTAD4-AS1	ASO_G0203706_07	74.043	1	50.408	exonic	Cytoplasmic	lncRNA_intergenic	30.38
1833	SERTAD4-AS1	SERTAD4-AS1	ASO_G0203706_AD_02	64.563	1	25.412	exonic	Cytoplasmic	lncRNA_intergenic	30.38
1834	SERTAD4-AS1	SERTAD4-AS1	ASO_G0203706_AD_03	70.377	1	26.164	exonic	Cytoplasmic	lncRNA_intergenic	30.38
1835	SERTAD4-AS1	SERTAD4-AS1	ASO_G0203706_AD_07	78.581	1	28.196	exonic	Cytoplasmic	lncRNA_intergenic	30.38
1836	SERTAD4-AS1	SERTAD4-AS1	ASO_G0203706_AD_09	73.969	1	33.915	exonic	Cytoplasmic	lncRNA_intergenic	30.38
1837	SERTAD4-AS1	SERTAD4-AS1	ASO_G0203706_AD_10	80.074	1	40.402	exonic	Cytoplasmic	lncRNA_intergenic	30.38
1838	SMURF2P1	SMURF2P1	ASO_G0248121_02	16.002	0	5.645	exonic	Nuclear soluble	pseudogene	15.667
1839	SMURF2P1	SMURF2P1	ASO_G0248121_04	19.491	0	-2.699	exonic	Nuclear soluble	pseudogene	15.667
1840	SMURF2P1	SMURF2P1	ASO_G0248121_07	-2.419	0	8.465	exonic	Nuclear soluble	pseudogene	15.667
1841	SMURF2P1	SMURF2P1	ASO_G0248121_09	30.191	0	19.467	exonic	Nuclear soluble	pseudogene	15.667
1842	SMURF2P1	SMURF2P1	ASO_G0248121_10	24.777	0	16.691	exonic	Nuclear soluble	pseudogene	15.667
1843	SNAI3-AS1	SNAI3-AS1	ASO_G0260630_01	25.158	0	7.207	exonic	Cytoplasmic	lncRNA_divergent	10.572
1844	SNAI3-AS1	SNAI3-AS1	ASO_G0260630_02	30.003	0	22.403	exonic	Cytoplasmic	lncRNA_divergent	10.572
1845	SNAI3-AS1	SNAI3-AS1	ASO_G0260630_03	87.648	1	52.411	exonic	Cytoplasmic	lncRNA_divergent	10.572
1846	SNAI3-AS1	SNAI3-AS1	ASO_G0260630_07	30.37	0	26.606	exonic	Cytoplasmic	lncRNA_divergent	10.572
1847	SNAI3-AS1	SNAI3-AS1	ASO_G0260630_09	28.303	0	30.44	exonic	Cytoplasmic	lncRNA_divergent	10.572
1848	SNHG18	SNHG18	ASO_G0250786_01	-12.588	0	4.461	exonic	Nuclear soluble	lncRNA_divergent	60.987
1849	SNHG18	SNHG18	ASO_G0250786_02	20.898	0	-10.473	exonic	Nuclear soluble	lncRNA_divergent	60.987
1850	SNHG18	SNHG18	ASO_G0250786_03	38.338	0	20.049	exonic	Nuclear soluble	lncRNA_divergent	60.987
1851	SNHG18	SNHG18	ASO_G0250786_04	80.662	1	65.632	exonic	Nuclear soluble	lncRNA_divergent	60.987
1852	SNHG18	SNHG18	ASO_G0250786_05	49.946	0	33.487	exonic	Nuclear soluble	lncRNA_divergent	60.987
1853	SNHG18	SNHG18	ASO_G0250786_AD_03	18.969	0	9.116	exonic	Nuclear soluble	lncRNA_divergent	60.987
1854	SNHG18	SNHG18	ASO_G0250786_AD_04	1.567	0	-1.305	exonic	Nuclear soluble	lncRNA_divergent	60.987
1855	SNHG18	SNHG18	ASO_G0250786_AD_07	5.101	0	-16.561	exonic	Nuclear soluble	lncRNA_divergent	60.987
1856	SNHG18	SNHG18	ASO_G0250786_AD_08	31.726	0	8.36	exonic	Nuclear soluble	lncRNA_divergent	60.987
1857	SNHG18	SNHG18	ASO_G0250786_AD_10	73.245	1	62.446	exonic	Nuclear soluble	lncRNA_divergent	60.987
1858	SOCS2-AS1	SOCS2-AS1	ASO_G0246985_02	79.755	1	47.828	exonic	Chromatin bound	lncRNA_divergent	8.867
1859	SOCS2-AS1	SOCS2-AS1	ASO_G0246985_03	50.717	1	37.872	exonic	Chromatin bound	lncRNA_divergent	8.867
1860	SOCS2-AS1	SOCS2-AS1	ASO_G0246985_05	45.473	0	19.488	exonic	Chromatin bound	lncRNA_divergent	8.867
1861	SOCS2-AS1	SOCS2-AS1	ASO_G0246985_07	64.577	1	24.59	exonic	Chromatin bound	lncRNA_divergent	8.867
1862	SOCS2-AS1	SOCS2-AS1	ASO_G0246985_10	79.928	1	79.609	exonic	Chromatin bound	lncRNA_divergent	8.867
1863	SOCS2-AS1	SOCS2-AS1	ASO_G0246985_AD_01	72.717	1	49.856	exonic	Chromatin bound	lncRNA_divergent	8.867
1864	SOCS2-AS1	SOCS2-AS1	ASO_G0246985_AD_02	56.802	0	16.471	exonic	Chromatin bound	lncRNA_divergent	8.867
1865	SOCS2-AS1	SOCS2-AS1	ASO_G0246985_AD_03	61.48	1	12.547	intronic	Chromatin bound	lncRNA_divergent	8.867
1866	SOCS2-AS1	SOCS2-AS1	ASO_G0246985_AD_04	97.037	1	92.861	exonic	Chromatin bound	lncRNA_divergent	8.867
1867	SOCS2-AS1	SOCS2-AS1	ASO_G0246985_AD_07	52.603	1	22.278	exonic	Chromatin bound	lncRNA_divergent	8.867
1868	SRP14-AS1	SRP14-AS1	ASO_G0248508_04	94.573	1	73.008	exonic	Chromatin bound	lncRNA_divergent	3.655
1869	SRP14-AS1	SRP14-AS1	ASO_G0248508_07	73.676	1	32.834	exonic	Chromatin bound	lncRNA_divergent	3.655
1870	SRP14-AS1	SRP14-AS1	ASO_G0248508_08	59.089	1	26.057	exonic	Chromatin bound	lncRNA_divergent	3.655
1871	SRP14-AS1	SRP14-AS1	ASO_G0248508_09	44.107	1	-0.637	exonic	Chromatin bound	lncRNA_divergent	3.655
1872	SRP14-AS1	SRP14-AS1	ASO_G0248508_10	87.381	1	75.055	exonic	Chromatin bound	lncRNA_divergent	3.655
1873	ST7-AS1	ST7-AS1	ASO_G0227199_01	3.279	0	13.962	exonic	Nuclear soluble	lncRNA_divergent	4.062
1874	ST7-AS1	ST7-AS1	ASO_G0227199_05	40.214	0	5.415	exonic	Nuclear soluble	lncRNA_divergent	4.062
1875	ST7-AS1	ST7-AS1	ASO_G0227199_06	22.407	0	18.219	exonic	Nuclear soluble	lncRNA_divergent	4.062
1876	ST7-AS1	ST7-AS1	ASO_G0227199_08	43.31	1	4.054	exonic	Nuclear soluble	lncRNA_divergent	4.062
1877	STX18-AS1	STX18-AS1	ASO_G0247708_01	32.555	0	9.218	exonic	Chromatin bound	lncRNA_divergent	4.629
1878	STX18-AS1	STX18-AS1	ASO_G0247708_02	88.321	1	49.874	exonic	Chromatin bound	lncRNA_divergent	4.629
1879	STX18-AS1	STX18-AS1	ASO_G0247708_03	30.458	0	17.204	exonic	Chromatin bound	lncRNA_divergent	4.629
1880	STX18-AS1	STX18-AS1	ASO_G0247708_05	82.489	1	51.142	exonic	Chromatin bound	lncRNA_divergent	4.629
1881	STX18-AS1	STX18-AS1	ASO_G0247708_09	24.851	0	7.044	exonic	Chromatin bound	lncRNA_divergent	4.629
1882	SUGT1P1	SUGT1P	ASO_G0226823_01	34.164	0	29.798	exonic	Chromatin bound	pseudogene	1.268
1883	SUGT1P1	SUGT1P	ASO_G0226823_03	-8.99	0	64.071	exonic	Chromatin bound	pseudogene	1.268
1884	SUGT1P1	SUGT1P	ASO_G0226823_04	7.261	0	32.417	exonic	Chromatin bound	pseudogene	1.268
1885	SUGT1P1	SUGT1P	ASO_G0226823_06	-7.107	0	21.352	exonic	Chromatin bound	pseudogene	1.268
1886	SUGT1P1	SUGT1P	ASO_G0226823_08	-10.26	0	65.44	exonic	Chromatin bound	pseudogene	1.268
1887	TERC	TERC	ASO_G0270141_01	99.057	1	49.384	exonic	Nuclear soluble	lncRNA_intergenic	82.013
1888	TERC	TERC	ASO_G0270141_03	88.467	1	50.646	exonic	Nuclear soluble	lncRNA_intergenic	82.013
1889	TERC	TERC	ASO_G0270141_04	68.329	1	-5.474	exonic	Nuclear soluble	lncRNA_intergenic	82.013
1890	TERC	TERC	ASO_G0270141_05	93.657	1	89.153	exonic	Nuclear soluble	lncRNA_intergenic	82.013
1891	TERC	TERC	ASO_G0270141_07	98.782	1	63.267	exonic	Nuclear soluble	lncRNA_intergenic	82.013
1892	TERC	TERC	ASO_G0270141_AD_01	77.91	1	54.717	exonic	Nuclear soluble	lncRNA_intergenic	82.013
1893	TERC	TERC	ASO_G0270141_AD_06	40.256	0	5.887	exonic	Nuclear soluble	lncRNA_intergenic	82.013
1894	TERC	TERC	ASO_G0270141_AD_07	4.428	0	17.432	exonic	Nuclear soluble	lncRNA_intergenic	82.013
1895	TERC	TERC	ASO_G0270141_AD_09	84.612	1	45.227	exonic	Nuclear soluble	lncRNA_intergenic	82.013
1896	TERC	TERC	ASO_G0270141_AD_10	86.971	1	71.38	exonic	Nuclear soluble	lncRNA_intergenic	82.013
1897	TMCC1-AS1	TMCC1-AS1	ASO_G0271270_03	44.071	0	24.742	exonic	Chromatin bound	lncRNA_divergent	1.919
1898	TMCC1-AS1	TMCC1-AS1	ASO_G0271270_04	18.349	0	0.261	exonic	Chromatin bound	lncRNA_divergent	1.919
1899	TMCC1-AS1	TMCC1-AS1	ASO_G0271270_05	54.801	1	17.794	exonic	Chromatin bound	lncRNA_divergent	1.919
1900	TMCC1-AS1	TMCC1-AS1	ASO_G0271270_07	43.853	0	18.623	exonic	Chromatin bound	lncRNA_divergent	1.919
1901	TMCC1-AS1	TMCC1-AS1	ASO_G0271270_09	79.443	1	83.292	exonic	Chromatin bound	lncRNA_divergent	1.919
1902	TMCC1-AS1	TMCC1-AS1	ASO_G0271270_AD_02	26.181	0	1.562	exonic	Chromatin bound	lncRNA_divergent	1.919
1903	TMCC1-AS1	TMCC1-AS1	ASO_G0271270_AD_05	4.454	0	10.609	exonic	Chromatin bound	lncRNA_divergent	1.919
1904	TMCC1-AS1	TMCC1-AS1	ASO_G0271270_AD_06	63.493	1	42.965	intronic	Chromatin bound	lncRNA_divergent	1.919
1905	TMCC1-AS1	TMCC1-AS1	ASO_G0271270_AD_08	40.702	0	34.796	intronic	Chromatin bound	lncRNA_divergent	1.919
1906	TMCC1-AS1	TMCC1-AS1	ASO_G0271270_AD_10	94.607	1	93.458	intronic	Chromatin bound	lncRNA_divergent	1.919
1907	TMEM44-AS1	TMEM44-AS1	ASO_G0231770_01	51.707	0	20.72	exonic	Nuclear soluble	lncRNA_divergent	5.486
1908	TMEM44-AS1	TMEM44-AS1	ASO_G0231770_02	57.197	1	46.103	exonic	Nuclear soluble	lncRNA_divergent	5.486
1909	TMEM44-AS1	TMEM44-AS1	ASO_G0231770_03	51.617	0	38.828	exonic	Nuclear soluble	lncRNA_divergent	5.486
1910	TMEM44-AS1	TMEM44-AS1	ASO_G0231770_04	64.675	1	23.865	exonic	Nuclear soluble	lncRNA_divergent	5.486
1911	TMEM44-AS1	TMEM44-AS1	ASO_G0231770_05	35.894	0	24.281	exonic	Nuclear soluble	lncRNA_divergent	5.486
1912	TMEM9B-AS1	TMEM9B-AS1	ASO_G0254860_02	82.769	1	68.173	exonic	Chromatin bound	lncRNA_divergent	4.094
1913	TMEM9B-AS1	TMEM9B-AS1	ASO_G0254860_03	85.568	1	68.302	exonic	Chromatin bound	lncRNA_divergent	4.094
1914	TMEM9B-AS1	TMEM9B-AS1	ASO_G0254860_05	51.786	1	45.215	exonic	Chromatin bound	lncRNA_divergent	4.094
1915	TMEM9B-AS1	TMEM9B-AS1	ASO_G0254860_09	94.105	1	64.915	exonic	Chromatin bound	lncRNA_divergent	4.094
1916	TP53TG1	TP53TG1	ASO_G0182165_01	30.864	0	-1.26613e+07	exonic	Cytoplasmic	lncRNA_divergent	28.596
1917	TP53TG1	TP53TG1	ASO_G0182165_02	40.46	0	8.248	exonic	Cytoplasmic	lncRNA_divergent	28.596
1918	TP53TG1	TP53TG1	ASO_G0182165_03	57.772	1	18.226	exonic	Cytoplasmic	lncRNA_divergent	28.596
1919	TP53TG1	TP53TG1	ASO_G0182165_04	81.822	1	48.769	exonic	Cytoplasmic	lncRNA_divergent	28.596
1920	TP53TG1	TP53TG1	ASO_G0182165_05	48.701	1	48.445	exonic	Cytoplasmic	lncRNA_divergent	28.596
1921	TP53TG1	TP53TG1	ASO_G0182165_AD_01	49.698	1	35.388	exonic	Cytoplasmic	lncRNA_divergent	28.596
1922	TP53TG1	TP53TG1	ASO_G0182165_AD_03	72.646	1	28.695	intronic	Cytoplasmic	lncRNA_divergent	28.596
1923	TP53TG1	TP53TG1	ASO_G0182165_AD_04	98.43	1	91.19	intronic	Cytoplasmic	lncRNA_divergent	28.596
1924	TP53TG1	TP53TG1	ASO_G0182165_AD_08	84.513	1	61.097	intronic	Cytoplasmic	lncRNA_divergent	28.596
1925	TP53TG1	TP53TG1	ASO_G0182165_AD_10	97.078	1	60.39	intronic	Cytoplasmic	lncRNA_divergent	28.596
1926	TRAM2-AS1	TRAM2-AS1	ASO_G0225791_01	92.105	1	36.609	exonic	Cytoplasmic	lncRNA_divergent	8.245
1927	TRAM2-AS1	TRAM2-AS1	ASO_G0225791_02	71.336	1	42.969	exonic	Cytoplasmic	lncRNA_divergent	8.245
1928	TRAM2-AS1	TRAM2-AS1	ASO_G0225791_03	37.589	0	13.041	exonic	Cytoplasmic	lncRNA_divergent	8.245
1929	TRAM2-AS1	TRAM2-AS1	ASO_G0225791_05	85.281	1	72.533	exonic	Cytoplasmic	lncRNA_divergent	8.245
1930	TRAM2-AS1	TRAM2-AS1	ASO_G0225791_AD_03	65.2	1	38.443	intronic	Cytoplasmic	lncRNA_divergent	8.245
1931	TRAM2-AS1	TRAM2-AS1	ASO_G0225791_AD_05	92.513	1	71.469	exonic	Cytoplasmic	lncRNA_divergent	8.245
1932	TRAM2-AS1	TRAM2-AS1	ASO_G0225791_AD_07	22.863	0	10.49	exonic	Cytoplasmic	lncRNA_divergent	8.245
1933	TRAM2-AS1	TRAM2-AS1	ASO_G0225791_AD_09	50.336	1	22.797	exonic	Cytoplasmic	lncRNA_divergent	8.245
1934	TRAM2-AS1	TRAM2-AS1	ASO_G0225791_AD_10	33.687	0	19.761	intronic	Cytoplasmic	lncRNA_divergent	8.245
1935	TTN-AS1	TTN-AS1	ASO_G0237298_01	61.55	1	70.548	exonic	Chromatin bound	lncRNA_antisense	6.365
1936	TTN-AS1	TTN-AS1	ASO_G0237298_02	73.324	1	42.779	exonic	Chromatin bound	lncRNA_antisense	6.365
1937	TTN-AS1	TTN-AS1	ASO_G0237298_05	47.281	0	52.945	exonic	Chromatin bound	lncRNA_antisense	6.365
1938	TTN-AS1	TTN-AS1	ASO_G0237298_07	40.355	0	47.8	exonic	Chromatin bound	lncRNA_antisense	6.365
1939	TTN-AS1	TTN-AS1	ASO_G0237298_09	82.605	1	88.065	exonic	Chromatin bound	lncRNA_antisense	6.365
1940	TUG1	TUG1	ASO_G0253352_01	22.516	0	83.627	exonic	Nuclear soluble	lncRNA_divergent	20.826
1941	TUG1	TUG1	ASO_G0253352_02	33.109	0	74.167	exonic	Nuclear soluble	lncRNA_divergent	20.826
1942	TUG1	TUG1	ASO_G0253352_03	50.936	1	51.396	exonic	Nuclear soluble	lncRNA_divergent	20.826
1943	TUG1	TUG1	ASO_G0253352_04	55.793	1	40.791	exonic	Nuclear soluble	lncRNA_divergent	20.826
1944	TUG1	TUG1	ASO_G0253352_06	93.788	1	87.555	exonic	Nuclear soluble	lncRNA_divergent	20.826
1945	TUG1	TUG1	ASO_G0253352_AD_01	82.586	1	50.561	exonic	Nuclear soluble	lncRNA_divergent	20.826
1946	TUG1	TUG1	ASO_G0253352_AD_02	81.052	1	44.924	exonic	Nuclear soluble	lncRNA_divergent	20.826
1947	TUG1	TUG1	ASO_G0253352_AD_07	98.599	1	97.553	exonic	Nuclear soluble	lncRNA_divergent	20.826
1948	TUG1	TUG1	ASO_G0253352_AD_08	81.9	1	63.559	exonic	Nuclear soluble	lncRNA_divergent	20.826
1949	TUG1	TUG1	ASO_G0253352_AD_09	72.036	1	26.548	exonic	Nuclear soluble	lncRNA_divergent	20.826
1950	U52111.14	U52111.14	ASO_G0232725_01	-43.937	0	23.734	exonic	Cytoplasmic	lncRNA_divergent	13.659
1951	U52111.14	U52111.14	ASO_G0232725_02	-46.637	0	41.423	exonic	Cytoplasmic	lncRNA_divergent	13.659
1952	U52111.14	U52111.14	ASO_G0232725_03	-37.76	0	48.555	exonic	Cytoplasmic	lncRNA_divergent	13.659
1953	U52111.14	U52111.14	ASO_G0232725_05	36.183	0	69.167	exonic	Cytoplasmic	lncRNA_divergent	13.659
1954	U52111.14	U52111.14	ASO_G0232725_07	38.394	0	39.378	exonic	Cytoplasmic	lncRNA_divergent	13.659
1955	U52111.14	U52111.14	ASO_G0232725_AD_02	30.882	0	54.177	exonic	Cytoplasmic	lncRNA_divergent	13.659
1956	U52111.14	U52111.14	ASO_G0232725_AD_05	60.92	1	37.335	exonic	Cytoplasmic	lncRNA_divergent	13.659
1957	U52111.14	U52111.14	ASO_G0232725_AD_07	67.397	1	43.673	exonic	Cytoplasmic	lncRNA_divergent	13.659
1958	U52111.14	U52111.14	ASO_G0232725_AD_09	15.188	0	42.144	intronic	Cytoplasmic	lncRNA_divergent	13.659
1959	U52111.14	U52111.14	ASO_G0232725_AD_10	33.896	0	8.47	exonic	Cytoplasmic	lncRNA_divergent	13.659
1960	UBL7-AS1	UBL7-AS1	ASO_G0247240_01	73.955	1	20.857	exonic	Cytoplasmic	lncRNA_divergent	5.717
1961	UBL7-AS1	UBL7-AS1	ASO_G0247240_02	65.493	1	60.81	exonic	Cytoplasmic	lncRNA_divergent	5.717
1962	UBL7-AS1	UBL7-AS1	ASO_G0247240_07	33.555	0	9.467	exonic	Cytoplasmic	lncRNA_divergent	5.717
1963	UBL7-AS1	UBL7-AS1	ASO_G0247240_AD_01	0	1	49.449	intronic	Cytoplasmic	lncRNA_divergent	5.717
1964	UBL7-AS1	UBL7-AS1	ASO_G0247240_AD_02	0	0	42.625	intronic	Cytoplasmic	lncRNA_divergent	5.717
1965	UBL7-AS1	UBL7-AS1	ASO_G0247240_AD_03	0	0	23.682	intronic	Cytoplasmic	lncRNA_divergent	5.717
1966	UBL7-AS1	UBL7-AS1	ASO_G0247240_AD_05	0	0	73.939	intronic	Cytoplasmic	lncRNA_divergent	5.717
1967	UBL7-AS1	UBL7-AS1	ASO_G0247240_AD_06	0	0	82.452	intronic	Cytoplasmic	lncRNA_divergent	5.717
1968	USP46-DT	USP46-AS1	ASO_G0248866_01	0	0	19.888	exonic	Nuclear soluble	lncRNA_divergent	6.026
1969	USP46-DT	USP46-AS1	ASO_G0248866_02	0	0	22.43	exonic	Nuclear soluble	lncRNA_divergent	6.026
1970	USP46-DT	USP46-AS1	ASO_G0248866_03	0	0	25.689	exonic	Nuclear soluble	lncRNA_divergent	6.026
1971	USP46-DT	USP46-AS1	ASO_G0248866_05	0	0	-26.086	exonic	Nuclear soluble	lncRNA_divergent	6.026
1972	USP46-DT	USP46-AS1	ASO_G0248866_06	0	0	-2.35	exonic	Nuclear soluble	lncRNA_divergent	6.026
1973	WDFY3-AS2	WDFY3-AS2	ASO_G0180769_01	25.831	0	50.857	exonic	Cytoplasmic	lncRNA_divergent	5.342
1974	WDFY3-AS2	WDFY3-AS2	ASO_G0180769_03	82.592	1	57.256	exonic	Cytoplasmic	lncRNA_divergent	5.342
1975	WDFY3-AS2	WDFY3-AS2	ASO_G0180769_04	-2.972	0	44.306	exonic	Cytoplasmic	lncRNA_divergent	5.342
1976	WDFY3-AS2	WDFY3-AS2	ASO_G0180769_05	19.208	0	52.345	exonic	Cytoplasmic	lncRNA_divergent	5.342
1977	WDFY3-AS2	WDFY3-AS2	ASO_G0180769_08	79.969	1	58.838	exonic	Cytoplasmic	lncRNA_divergent	5.342
1978	WDFY3-AS2	WDFY3-AS2	ASO_G0180769_AD_03	61.41	1	60.224	intronic	Cytoplasmic	lncRNA_divergent	5.342
1979	WDFY3-AS2	WDFY3-AS2	ASO_G0180769_AD_04	47.634	0	21.198	intronic	Cytoplasmic	lncRNA_divergent	5.342
1980	WDFY3-AS2	WDFY3-AS2	ASO_G0180769_AD_06	29.085	0	18.175	intronic	Cytoplasmic	lncRNA_divergent	5.342
1981	WDFY3-AS2	WDFY3-AS2	ASO_G0180769_AD_07	58.449	1	39.16	intronic	Cytoplasmic	lncRNA_divergent	5.342
1982	WDFY3-AS2	WDFY3-AS2	ASO_G0180769_AD_09	69.597	1	50.334	intronic	Cytoplasmic	lncRNA_divergent	5.342
1983	ZBED5-AS1	ZBED5-AS1	ASO_G0247271_01	68.237	1	49.36	exonic	Nuclear soluble	lncRNA_divergent	9.056
1984	ZBED5-AS1	ZBED5-AS1	ASO_G0247271_02	71.373	1	43.262	exonic	Nuclear soluble	lncRNA_divergent	9.056
1985	ZBED5-AS1	ZBED5-AS1	ASO_G0247271_03	66.509	1	49.413	exonic	Nuclear soluble	lncRNA_divergent	9.056
1986	ZBED5-AS1	ZBED5-AS1	ASO_G0247271_05	37.958	0	15.655	exonic	Nuclear soluble	lncRNA_divergent	9.056
1987	ZBED5-AS1	ZBED5-AS1	ASO_G0247271_07	64.356	1	43.905	exonic	Nuclear soluble	lncRNA_divergent	9.056
1988	ZNF37BP	ZNF37BP	ASO_G0234420_01	66.691	1	78.202	exonic	Chromatin bound	pseudogene	9.855
1989	ZNF37BP	ZNF37BP	ASO_G0234420_02	34.405	0	27.358	exonic	Chromatin bound	pseudogene	9.855
1990	ZNF37BP	ZNF37BP	ASO_G0234420_04	1.473	0	42.594	exonic	Chromatin bound	pseudogene	9.855
1991	ZNF37BP	ZNF37BP	ASO_G0234420_08	35.111	0	32.767	exonic	Chromatin bound	pseudogene	9.855
1992	ZNF37BP	ZNF37BP	ASO_G0234420_AD_03	46.609	0	36.278	intronic	Chromatin bound	pseudogene	9.855
1993	ZNF37BP	ZNF37BP	ASO_G0234420_AD_04	36.669	0	1.956	exonic	Chromatin bound	pseudogene	9.855
1994	ZNF37BP	ZNF37BP	ASO_G0234420_AD_07	72.165	1	50.138	intronic	Chromatin bound	pseudogene	9.855
1995	ZNF37BP	ZNF37BP	ASO_G0234420_AD_09	61.828	1	43.691	intronic	Chromatin bound	pseudogene	9.855
1996	ZNF37BP	ZNF37BP	ASO_G0234420_AD_10	81.477	1	23.689	intronic	Chromatin bound	pseudogene	9.855
1997	ZNF667-AS1	ZNF667-AS1	ASO_G0166770_01	0	0	29.194	exonic	Cytoplasmic	lncRNA_divergent	18.182
1998	ZNF667-AS1	ZNF667-AS1	ASO_G0166770_02	0	0	16.471	exonic	Cytoplasmic	lncRNA_divergent	18.182
1999	ZNF667-AS1	ZNF667-AS1	ASO_G0166770_03	0	0	25.547	exonic	Cytoplasmic	lncRNA_divergent	18.182
[truncated: 22 more rows]

## Sheet: Table S2C
	KD.pubID	KD.geneSymbol	primer1F (5'-3')	primer1R (5'-3')	primer2F (5'-3')	primer2R (5'-3')	primer3F (5'-3')	primer3R (5'-3')
1	A1BG-AS1	A1BG-AS1	AGTGTCTGGGTGATGGATCCT	ATGTGCAGTGTGGTGTGACA	AGCATGGACATGATGGTCGC	ACTTGACCTCAGCAGCTCCA	CAAGGAGCATTCCAGGCAGA	CCAGCTGGTCTTCATCACGT
2	AC004980.7	AC004980.7	GAACACATTGCAGCTGCTGG	GGCTTGCAAACCTCTGAAGC	GCTTCAGAGGTTTGCAAGCC	TGAATGGACATCACCTGGCG	ATGGAGGCCAATTAGCGGAC	AGCAGAAGCAAGACACTGGG
3	SPRY4-AS1	AC005592.2	TGCGAGAGGAGGAAGCTAGT	GTGTCGCTCTTCTGGAAGCT	ACATCAACCGGGAAGAGCTG	AAAATCGGCAACTGCTCCCA	TGAACTCCAATGCCATCCCC	ATTTGAGAGGTGCTGGCTCC
4	MAP4K3-DT	AC007246.3	ACTATGGATGAGCAGTGTGGC	AAAGCAAGACTCTGCCTCTGAG	AAAATCATGTCCACCGGGGG	TTCTCTCTCTGTAGTCTCAGCACT	GAGCTGAAGGGGGCATCTTT	GCTATGTTGCCAGCCCCTTA
5	AC007773.2	AC007773.2	GCGGAGAGGATTTTGCGTCT	CAACAGAGCAAGACCCTGCT	ACGAAATCCTCCCATCTCAACC	ACAGTTCCATCGCAGAGGTG	TTCCGAAAACAGGCTCCTCTG	AAGGTTGAATCTGCAGTCAGCT
6	MYOSLID	AC007879.7	AAAAAGGTTCCTGGTGCTGGT	CTGTGAGCCGTCAACAGCTA	ATGCATGGCCTAACTCCCAC	TTCAGCAATGCCTGGAGAGG	ATGCTGGGGAGGTAGCTTGT	TCAGGCAGGTGAGAGTGGAT
7	AC009005.2	AC009005.2	GTACAAGAGAGGCTGGCGGTTA	GAGTCTGGGTTTACGCGTCA	AAGGACCCTTGAAGTTCCGC	GGGCTGTGGTCACTTTCACT	CATCCAAACCGGCTGATCCT	GTGCGTAGACTGGTCAGCTT
8	AC009237.8	AC009237.8	TCTGATACTGCCCAGCCACT	AGTGACCGGTTTCCGCAAGA	TGTGTAGAACGGCAATGGCA	ATGCTCCAACGTCAGACTGG	TGACCACTCCTGAGACCCAA	ATGCCAGAGACACTGCTGAC
9	CHROMR	AC009948.5	CCCTGCACTCCAAACACAGA	ACCCAGCAACTCCACTCCTT	GCGCTGACAGATGGAAGACT	TGCCATATGACCCAGCAACTC	TGTAGAAAGCTAGCACGAGCC	AGCCTCCATGGAATAAGCTTCTC
10	ZNF232-AS1	AC012146.7	TGGAGAGTGAGCCCTTATGAGA	CTCAGGTCTAATGCAGCACCA	TTCCACGCTCGCTACATTCC	GGAAAGCCTTCAGATGGAGCT	TGGTGCTGCATTAGACCTGAG	AGCCCTATGAATGTGACAAGCA
11	LINC01535	AC012309.5	AGTTTCCCGACCTCTGACACA	AGCTCCAGATCCTTCCAATGC	CCTCTGTTTTGCATGCATTGGA	AGTATTCTGGGGAGCAGCCT	GGTTCCCACCTCTCAAGATCATT	ACAAAGTCAGGGAGGGGTGT
12	LINC01578	AC013394.2	TCGGACCCGGTGACTTAAGA	CCAACGTCTCAGTCTTCAAAATGG	CCATTTTGAAGACTGAGACGTTGG	TGGGGCCTTTAGAGGATTCAGT	AGATGGCAGTCTACTATGGGGAA	TCCACTGTCCATTTGTGTTGGG
13	AC016747.3	AC016747.3	TGCCAGTACAACAGCCACAA	CTCTCCAATGCAGTCTGCTGA	ACTGCATTACATCAGCAGACTGC	CAACCAAATCGGGAAAGCCG	CTTCCTGTGGCCCTCAAACA	ATCTCAGGCTTTTCTGTCCCG
14	LINC01116	AC017048.3	AGAATGGTGGGGTCTCACTCT	TTCCAGCTACTCGGAAGGCT	ACCAAAGTCTTGCCTCCCCT	AGAGTGAGACCCCACCATTCT	GGGGAATCGGCAGGAAATGA	ATATTGAACTGAGCGGGGCTTT
15	LINC01117	AC017048.4	TGTAGCAACTTGGGACACTGG	TGGGGAAAATGATCCACGGG	GCCCAAAGCCATGTAGCAAC	GGCTCAACTGGCTCATGAGT	TGCTGCAAAAGAAGGCCATTG	GCATCCACAAAATCCAGTGTCC
16	AC018464.3	AC018464.3	GGAGAAAACACTGAAAAGCACCTG	TGCAGCCAACAGACACATGA	TCATGTGTCTGTTGGCTGCA	CCCCGATGCATTCAATTGGGA	GGAGAGTTGTGAGGAGATAAGTGAC	TCAGTGTTTTCTCCACACAGCA
17	LSP1P4	AC027612.6	AGTGGTAGTTCATCGCACGG	TGGAGGTCAGTGTGGAAGGA	CACCATGCAGTTTCCAAGCC	GGTTGGACTCCATGCGTGAT	CATCCAAGCCCTGCCAGAAT	CCGTGCGATGAACTACCACT
18	AC046143.3	AC046143.3	TGGCAGTACAGCAGCTTACC	TCAGAGTGTGACTGGGTGGA	AGGAGTCGCTGGTGTTGATG	CAGATGGCACTTAGGCTGCA	TGCAGCCTAAGTGCCATCTG	AACCAGAAGGCAGAAAGCTCC
19	AC084219.4	AC084219.4	TCTGGAGCCAGTGTGTACGA	TCGTGGCTTTGGGATTCGTT	AAAGACACGAGGCCCATCTG	GTGAGGAGTGTGGAAAAGGCT	TTCAAAAGACATGGGGCCCG	CTTTCACCAGCGCGTCCATA
20	ZFAND2A-DT	AC091729.9	TACGTGTGGCCAGGATCTCA	CTGCAGTCCCGCCAAGAATA	ATCAAGAAACTACGTGTGGCCA	GGTGTATGAGAAGTCTTTGCCCT	GGCCAAAGAACCTGGAGTGT	GCTAGAACAAGGCAGGCAGA
21	ZNF529-AS1	AC092295.7	AAGTTGCTGGGTAATTGGTGGA	ATAGAAAGTAGGGCCGGGCA	AAGCTGGCACGTTTCCATTTC	GTGGCGAAACCTTGTCTCCA	TGTTGCACCACTGTTTCCCT	TCCCATTCCTCTGGTGACCA
22	ITGA9-AS1	AC093415.2	CGACACAGGACTGCAGTTGA	AATGGGATGCCACAGTTCCC	GGTGCCAGGCATGAGAATGA	GTGGGTGGAGAACAAAGCCT	AAGACACACCTGCTCCATGC	GCTGGAAGGCTGGATTCAGT
23	AC093627.10	AC093627.10	GAAGCTGGAAGTTTGGCTGC	TGGCAACTTGGTCTTGGACTT	TTTGGTTCTAAAGCCCGGGG	ATCAGGACGATCAGGACCGA	CACTCAAGCCTTCCACGACA	GCTCTGCCATCACCCACAAT
24	AC093627.9	AC093627.9	AGGGTGCGAGGAAGACAATG	TCCGTTCACGAACCTCGAGT	TCTGTGAGCCGACAGGAACA	TTCCACAGTGCTTTTCAGGGT	AGTAACGGAGAGTGGCGCTA	TCGGTTTGGTCTGTTGGGAC
25	RNASEH1-AS1	AC108488.3	TGAGAAGGCCTTGGGGATGA	CAACAGCTTGTTCTGCCTGC	GCAAAAGCGACGCGTACATT	CGATGCAGGTCTGGACAAGT	TAGGAAGAAGGAACGGCCCA	GCCTGGTATATTGTGGGCACA
26	AC108488.4	AC108488.4	CAGCCACTACCTGAAGCATCA	CGCAGCACTTTCAAGGCATT	TGTTGTTTCAAGCCCCCGAG	TGTGGGACAAGAACTTGGGAC	AGAAACGGAACCAGCGGGAA	AAAATACCACAGGCTCGGGG
27	AC112721.2	AC112721.2	TGCAGCCAGTGGAAAAAGGA	TGAGGAAACAAGGAAGCCGTT	CTTCAAACTCAGCCGCTGGA	TCCTTTTTCCACTGGCTGCA	CCATGAATCAGTGTCCGCCT	AAAGCCTCCTGAGAGAGCGT
28	AC124789.1	AC124789.1	CAAGATGTCCCCAGCCATGT	AAGGTCTCTGCAGTTGGCTG	TCCACTGTCCCCAGCAAGAA	TGGTGGTTCCAGCTGGTCTA	TGTCCATTTCCTGCCCTCTAAC	TCCCAGTGCTGAGATTGCAG
29	AC144652.1	AC144652.1	ACGCCTAGAGAGCAAACCAC	ACGACTCGGATGTAGGCTCT	AGAGCCTACATCCGAGTCGT	ACGTTTCTAAGCCTGCAGGG	GCATCCGGTTGCATTTCCTG	AGGCTTGAGAGGAGTCAGCT
30	AMZ2P1	AMZ2P1	ACAGATGGCACTGGTGAGGT	GCTTCCTTCCACGGGTTTCA	TTGGACAGGCCTCTTTGACAG	TCCTCACGACTGTGTTCTGGA	CGATGTGAATGGAAGAAACCTGTC	TGTGACACAAGCACTGGATTCT
31	AP000704.5	AP000704.5	ACCCCTGCTAGATGAAGTCTCA	TTTCTGTCACCCAGGCTTGAG	CCGCAGAAGGTGAAGGAACA	GTTACCATGCAGGAACCCACT	CGGAAAGTGGGTTCCTGCAT	AGTGGCCAAGTCTCTCCTCA
32	FAM111A-DT	AP001258.4	TCATGCCTCAGCCACTTGAG	TTGGAGGGTCATTTGGGCTG	AGGATTTCGCCATGTTCCCC	AGAGGGTCTTGGAGGGTCATT	TGGCGACAGAGGATTAGCCT	TTCGTTTGGACATTGCAGTGTG
33	ARHGAP5-AS1	ARHGAP5-AS1	TGGGCTTTGGGTGTGTTTCT	TGTGCAAGGCAGATTCCGAT	ATATTGTGCTCGCGGTTCCA	CGCATGTTTTCCTCCCTTGC	GAGGAAAACATGCGCCCAAG	GTCTGTAGTTGGCGAGCGAT
34	BOLA3-AS1	BOLA3-AS1	AGTCAGAAGCTCCGAGGCTA	GCGTCAGCTTCCCTTCCATT	CCAGGGCCTGTTTCATGGAT	ATCAGGAGCACGAGGGGTAT	AACCAAGTGACCCATGGCAA	TTGCCTGGCCAAAAGTACCA
35	BX322557.10	BX322557.10	AAAGGCCTCCAGAGACAGGA	CCCCAAGCGTTTGTCCATCA	TCAGGACGACTCCAAGTGGA	ATTTCTGGGAGCTCGGGACT	CGAGTGCCATGAGTTCCTGT	ATCTGAGACTCAGGCGTCCT
36	C11orf95	C11orf95	GAAGGCGGGCAAGATCTTCA	TTCCTGCCTGAAGATGCTGG	AAGTTCGGATAAGCCAGGGC	AAGGTGATGCTGCTGGTCTC	CACACTGCTTCCCAATTCGC	AGGAGTCACAGATCCACCGT
37	PCOTH	C1QTNF9B-AS1	AAAGCAGAGGTGACCTTGCC	TCGGGGATGAGATGTGGTGT	GCTCACGTAAGCATCTCTGGT	CACGGTGCTGAGCAAGTTTC	AGCCTCTTATTCCCCGGACT	GCCCTATTGGAAAGCCTGGT
38	CATG00000011013.1	CATG00000011013.1	AGTCCATTCCAGTTCCAGCG	TGACCTGCACCAAGAGCTCA	AGATCAGAAAGGCAGGTTCAGG	TGGAGTTAAAGGTGGATGCTGG	GATAGGGCAAGCCAGAGCAA	TGCTATTCCCCATGCCCTTG
39	CATG00000016989.1	CATG00000016989.1	GCAAAAACATCTGCCTCCTGTG	TCCTCTTCCAAAGCGCTTCC	TCCCAGTCTCTTCAGTGGCA	CGGTGGCATGGAATCAGAGT	GGAAGCGCTTTGGAAGAGGA	TCTGCTTTGAAGTGCCTGCC
40	CATG00000020700.1	CATG00000020700.1	AAAGAAGGTTGGGGCCAGTC	TGCAGTTTACAAAGCCTGTTGGTG	TCTGTATGGGAGCCAGGGAAT	CGCGTGACAGGATCCATGAT	ATAGTCTCTCTACGTGGCCAGG	GGAAGCCTCCATAAAGGGATGTG
41	CATG00000034824.1	CATG00000034824.1	CAGCATAAAGGCCCTCCACA	AGCCAGTCCATTCCACCATG	CTGTGACCAGCTCATCTGCA	CAGCTCTTGCCTGGATGACA	TCACTGAAGCCTCTGTCCCT	ACATCCAACCCGACACATCC
42	CATG00000035089.1	CATG00000035089.1	CAGACACGGTGTTGGAACCT	GGAGGCTGGAAGTCCAATGTT	TTCTCCCCAGAGGAAGGCAA	TCTGGTGAGGGCTGTTCTCT	TCCTCAACGTGGTGGTAGGT	AGGCCATGTCATGATGATCTGG
43	CATG00000073509.1	CATG00000073509.1	AACAACAGTGTGGGAAGCCA	GAGCAGGAAATAGTCATCCATCCA	TCAGTCCACTCAACATCTTCAGC	TGGCTTCCCACACTGTTGTT	CACGGAGGAGATTTATGACTACCC	TCCAATCTGAGATGTTGCTGCC
44	CATG00000076290.1	CATG00000076290.1	GCCATCCTCCCCAAACACAT	TCCATGGTTGCCTGTTCTGC	GTTCTTGCAGCTTGGAGTGTG	GGGTCTTCCATCTCAGCATACAA	GCAAACAGGAGGAAGCAGGA	ATGTGTTTGGGGAGGATGGC
45	CATG00000079799.1	CATG00000079799.1	ACCATGGGAAACTTGCAGCT	CAATCTTGGTTCACCGCAGC	GACTTCACATGTGCTGCCAAG	TCTGGCACATAGTAGGTCCTCA	TGCTGTGTGAAGATGAAGGCA	GATCACAGTGTTGGCAGGGT
46	CATG00000083589.1	CATG00000083589.1	AAAGCGCTTGGATGCAGTTG	GCACATGTTACTGCACCAGC	AAGGAGGCAATCTGTCAGGC	GTTTTGAGCCGCAGTGTCTG	ACATCAGCACTTCCCAGCTC	TGGTCCACCTCTAGCAAGCT
47	CATG00000089639.1	CATG00000089639.1	TGGCCCGAAAGAACCAAAGT	GATTCCCTCCCCAGTTTCTTGAT	ACAGCAACAGCTCCTAGGAGA	TGCTAAGTTGTTCTGCTCTGCT	ACGGAGTTGGGGCAGATTATG	TTGGGTGAGTTTGGCTCCAG
48	CATG00000095991.1	CATG00000095991.1	GCAATCCTTCTGCTTTGGCC	AAGACCAGTCTTTCTCCGTGC	AAGAGAAGAGTGTGGCCTCCT	AAAGCCAAGAGGTCAAGCCG	CGGCTTGACCTCTTGGCTTT	ACAGTGGTTTGCAGTTCTCCTT
49	CATG00000098665.1	CATG00000098665.1	AAACACCCACTCAGCCACTC	AAGAGGGGCTTTGGCTGTTT	AGAATGCGTCCCCTCACTTG	AGTGGCTTCTGCTTCACTGG	GCCAAAGAAACGCAGACACC	TGGCTTGATGGAGCTGTCTG
50	CATG00000098831.1	CATG00000098831.1	AGATGCTGGGTGAACACACTC	AGTGTCAGTACCTGCATCGATG	GGGATGGGGCTCAACCAATT	TTTCTCAGCCAAGTGCAGCT	TGCTCACTCACCCTCCAGAA	GTTCCCTGCTGTAGCTGTGTT
51	CATG00000106837.1	CATG00000106837.1	TGAGGTGTCGGAAAATGTCCC	ACACACTCCTCATTCCATCTGAC	ATGAGTCACTGCCAACGCAA	ATTGTCCTCTTCCCAGCAGC	GCTGCTGGGAAGAGGACAAT	AGGACCCGATACTCTCTCCATC
52	CATG00000108369.1	CATG00000108369.1	GCGCAGATCTCGATCCCAAA	AAATTTCCCGAGGAGGCGTC	ATCCACCCATTGCCCGTTTT	CCCTGTGTTATCTCTGTGCACA	AGTGTGCCCCTGGTAGTCTT	TATCTTGTGCAGGGCCCTGA
53	CATGC0000023317	CATGC0000023317	CAAGAGTAGAGACGGGGGTTTC	AAATCTGTTGGGTGGGACGG	GCCATGCGAGGAACTAACGA	TCTCTCCACTCCAGCCACAT	GGATGTCACATAAGCGCCCA	AGTTCCTCGCATGGCTTGTT
54	CATGE0000171943	CATGE0000171943	GGCACCGATCTGCGTAGAAA	TTCACTTGCCTGGCTCTGAC	GGCACCGATCTGCGTAGAAA	CGTTTGCTCCGGTTCACTTG	CACACCATGTTGTGCGGAAG	CATTAGCCGGGAGAACTGCA
55	CD27-AS1	CD27-AS1	TTACAGGACAAGGAGAGGGACA	CCTGGGAAGCCACAAGGAAA	TTTCCTTGTGGCTTCCCAGG	TTTTGGCGGAGACCCTTGTC	TCCTTATGGCCCTGTGACCT	ACTGTCCCAGGCTTCCTCAT
56	CD99P1	CD99P1	TCACCCAAGCTGAAGCCAAA	GTGCTGGCTCGTAGTTTCCT	GGCAGTGATGTCCGTGTCAT	CCTCCATCACGAAAGGCATCT	CCTGAGCAGCCTGGATTCATT	TTTGGGTGGGTTCAGTGGTG
57	CKMT2-AS1	CKMT2-AS1	GTGAAATTGCCGGCAAGAGG	AGTGGAGCGGGCAGAGATAT	TAACCCAGACGCCAGGGATA	TGAGAGCTGGAGACCACCTT	CCGTGCTGTCTGAACTCACA	CTCTTGCCGGCAATTTCACC
58	COX10-AS1	COX10-AS1	AAGGAACGAAGAGCACAGGAAA	ACTGACGAAGGAAACCTGGATC	AAGTTGACAGGCATCCTCCG	GAGCATGGGAGTTCAAGGCT	TGACAGGTCTGAGGCCTGAA	CGGAGGATGCCTGTCAACTT
59	MIATNB	CTA-211A9.5	GTGGTCTCTAGATGGGTTTTCACT	GCGCAGTGGCTCATACCTATAA	TCCCACACAGGAAGTCAGCT	TGGCTCCAATTCCAAGACAGG	TGCAAGTTACACTGACCACGT	AAAACATTCCTCCAGCCGGG
60	NUP50-DT	CTA-217C2.1	CGGGAATCGTGTGAGGAACA	TGCACCATCATCACTGCACA	GCGGTGCTCTTTCCTCTTCT	GGGCTCATGACGTCACTCAA	CTGCTTTGTTGCTAGTGCGG	GAAGAGGAAAGAGCACCGCT
61	CTB-31O20.2	CTB-31O20.2	TGCGAGGGCTGTATTTAGGC	ATCTCACGCCTACCAGGTCT	TTCGGAACACGTCTGCCTTT	AGAGGACAACACGCTCTGGA	AGACCTGGTAGGCGTGAGAT	TCTCGAAACGACTGTCAGTGG
62	CTB-55O6.12	CTB-55O6.12	TGTCAACAGAACCCTCTTCACC	TTCTGTGGTCAGGTCTGCGT	ACTGTCTGCAAAGCCCTGAG	ACCCCTGACCCAGTACCTTT	AAGGCGCAGTGAAAGACGAA	GCTTTCGGCCTCCTCTTCAT
63	LINC01184	CTC-228N24.3	GCAAGCGGTCTTCTCTGTCT	GCAGACAATTGCTGTGGCTTATC	TTATGGCAGCCTCACTCCCA	ACTGTTCTCAGGATCATCAGACAC	ATGATGGGAGTTCAGGGGCT	TTTCCACATGGCTCCTGCTC
64	TMEM220-AS1	CTC-297N7.5	TGTGTGACCTTGGCTCCTGT	GATGCAGCATCCCTGGACAA	TATGGTGCAAGTGTGGCCAG	TGCAGGCACTTTCTGGGAAA	GGTCCTTGCTGTGTGACCTT	CTGGCCACACTTGCACCATA
65	CTC-338M12.4	CTC-338M12.4	CAGGATTCGGCCTTTCCCTT	ACAGGTAGACTTCTGAAGGGGT	GAGGCACCACTTCCATTCCAT	TACATCTTCCAGTTTGTCCATCCC	TGTCTTAGAGCCCGTGTGGA	AAGGGAAAGGCCGAATCCTG
[truncated: 220 more rows]
