# Supplementary material for: Functional annotation of human long noncoding RNAs via molecular phenotyping
Source: Genome Res. 2020 Jul;30(7):1060–72. doi: 10.1101/gr.254219.119 (PMC7397864; doi:10.1101/gr.254219.119)
Supplement: Supplemental Material [file supp_gr.254219.119_Supplemental_Table_S3.xlsx]

## Sheet: Info
	Supplemental Table S3. Growth and morphology quantification.
	Table S3A. Normalized morphology measurements (ASO-based).			Table S3B. Significance test of morphology changes (ASO-based).			Table S3C. lncRNA consistently targets affecting morphology changes.
	ID	Description		ID	Description		ID	Description
1	KD.pubID	HGNC symbol or KD.geneSymbol otherwise	1	KD.pubID	HGNC symbol or KD.geneSymbol otherwise	1	KD.pubID	HGNC symbol or KD.geneSymbol otherwise
2	KD.geneSymbol	gene symbol of the knockdown target	2	KD.geneSymbol	gene symbol of the knockdown target	2	KD.geneSymbol	gene symbol of the knockdown target
3	perturb_id	ASO id	3	perturb_id	ASO id	3	morphology	morphologies that passed the binomial cutoff
4	Description	classification of knockdown targets: lncRNA, positive controls etc.	4	Description	classification of knockdown targets: lncRNA, positive controls etc.	4	Success.KD.ASO	number of ASO with successful KD
5	transfection_plate	transfection plate	5	GrowthRate_mean	normalized GrowthRate average	5	ASO.cutoff.Up	binomial cutoff as number of ASO for up-regulation
6	GrowthRate_rep1	normalized GrowthRate replicate 1	6	GrowthRate_pvalue	Student t-test p value (normalized growth rate of ASO replicates to matching (same plate) negative controls)	6	Hit.ASO.Up	number of ASO with successful KD and significant up-regulated morphology (mean > 1 & FDR < 0.05 in Table S3B)
7	GrowthRate_rep2	normalized GrowthRate replicate 1	7	GrowthRate_tvalue	Student t-test t value	7	Confidently.Significant.Up	If the lncRNA target pass the binomial cutoff for up-regulation
8	Area_rep1	same as above but for a different morphology	8	GrowthRate_fdr	Student t-test fdr	8	ASO.cutoff.Down	binomial cutoff as number of ASO for down-regulation
9	Area_rep2	same as above but for a different morphology	9	Area_mean	same as above but for a different morphology	9	Hit.ASO.Down	number of ASO with successful KD and significant down-regulated morphology (mean < 1 & FDR < 0.05 in Table S3B)
10	Compactness_rep1	same as above but for a different morphology	10	Area_pvalue	same as above but for a different morphology	10	Confidently.Significant.Down	If the lncRNA target pass the binomial cutoff for down-regulation
11	Compactness_rep2	same as above but for a different morphology	11	Area_tvalue	same as above but for a different morphology	11	Confidently.Significant.UporDown	If the lncRNA target pass the binomial cutoff for either up-regulation or down-regulation
12	Eccentricity_rep1	same as above but for a different morphology	12	Area_fdr	same as above but for a different morphology
13	Eccentricity_rep2	same as above but for a different morphology	13	Compactness_mean	same as above but for a different morphology
14	Extent_rep1	same as above but for a different morphology	14	Compactness_pvalue	same as above but for a different morphology
15	Extent_rep2	same as above but for a different morphology	15	Compactness_tvalue	same as above but for a different morphology
16	FormFactor_rep1	same as above but for a different morphology	16	Compactness_fdr	same as above but for a different morphology
17	FormFactor_rep2	same as above but for a different morphology	17	Eccentricity_mean	same as above but for a different morphology
18	MajorAxisLength_rep1	same as above but for a different morphology	18	Eccentricity_pvalue	same as above but for a different morphology
19	MajorAxisLength_rep2	same as above but for a different morphology	19	Eccentricity_tvalue	same as above but for a different morphology
20	MaxFeretDiameter_rep1	same as above but for a different morphology	20	Eccentricity_fdr	same as above but for a different morphology
21	MaxFeretDiameter_rep2	same as above but for a different morphology	21	Extent_mean	same as above but for a different morphology
22	MaximumRadius_rep1	same as above but for a different morphology	22	Extent_pvalue	same as above but for a different morphology
23	MaximumRadius_rep2	same as above but for a different morphology	23	Extent_tvalue	same as above but for a different morphology
24	MedianRadius_rep1	same as above but for a different morphology	24	Extent_fdr	same as above but for a different morphology
25	MedianRadius_rep2	same as above but for a different morphology	25	FormFactor_mean	same as above but for a different morphology
26	MinFeretDiameter_rep1	same as above but for a different morphology	26	FormFactor_pvalue	same as above but for a different morphology
27	MinFeretDiameter_rep2	same as above but for a different morphology	27	FormFactor_tvalue	same as above but for a different morphology
28	MinorAxisLength_rep1	same as above but for a different morphology	28	FormFactor_fdr	same as above but for a different morphology
29	MinorAxisLength_rep2	same as above but for a different morphology	29	MajorAxisLength_mean	same as above but for a different morphology
30	Perimeter_rep1	same as above but for a different morphology	30	MajorAxisLength_pvalue	same as above but for a different morphology
31	Perimeter_rep2	same as above but for a different morphology	31	MajorAxisLength_tvalue	same as above but for a different morphology
32	Solidity_rep1	same as above but for a different morphology	32	MajorAxisLength_fdr	same as above but for a different morphology
33	Solidity_rep2	same as above but for a different morphology	33	MaxFeretDiameter_mean	same as above but for a different morphology
			34	MaxFeretDiameter_pvalue	same as above but for a different morphology
			35	MaxFeretDiameter_tvalue	same as above but for a different morphology
			36	MaxFeretDiameter_fdr	same as above but for a different morphology
			37	MaximumRadius_mean	same as above but for a different morphology
			38	MaximumRadius_pvalue	same as above but for a different morphology
			39	MaximumRadius_tvalue	same as above but for a different morphology
			40	MaximumRadius_fdr	same as above but for a different morphology
			41	MedianRadius_mean	same as above but for a different morphology
			42	MedianRadius_pvalue	same as above but for a different morphology
			43	MedianRadius_tvalue	same as above but for a different morphology
			44	MedianRadius_fdr	same as above but for a different morphology
			45	MinFeretDiameter_mean	same as above but for a different morphology
			46	MinFeretDiameter_pvalue	same as above but for a different morphology
			47	MinFeretDiameter_tvalue	same as above but for a different morphology
			48	MinFeretDiameter_fdr	same as above but for a different morphology
			49	MinorAxisLength_mean	same as above but for a different morphology
			50	MinorAxisLength_pvalue	same as above but for a different morphology
			51	MinorAxisLength_tvalue	same as above but for a different morphology
			52	MinorAxisLength_fdr	same as above but for a different morphology
			53	Perimeter_mean	same as above but for a different morphology
			54	Perimeter_pvalue	same as above but for a different morphology
			55	Perimeter_tvalue	same as above but for a different morphology
			56	Perimeter_fdr	same as above but for a different morphology
			57	Solidity_mean	same as above but for a different morphology
			58	Solidity_pvalue	same as above but for a different morphology
			59	Solidity_tvalue	same as above but for a different morphology
			60	Solidity_fdr	same as above but for a different morphology

## Sheet: Table S3A
	KD.pubID	KD.geneSymbol	perturb_id	Description	transfection_plate	GrowthRate_rep1	GrowthRate_rep2	Area_rep1	Area_rep2	Compactness_rep1	Compactness_rep2	Eccentricity_rep1	Eccentricity_rep2	Extent_rep1	Extent_rep2	FormFactor_rep1	FormFactor_rep2	MajorAxisLength_rep1	MajorAxisLength_rep2	MaxFeretDiameter_rep1	MaxFeretDiameter_rep2	MaximumRadius_rep1	MaximumRadius_rep2	MedianRadius_rep1	MedianRadius_rep2	MinFeretDiameter_rep1	MinFeretDiameter_rep2	MinorAxisLength_rep1	MinorAxisLength_rep2	Perimeter_rep1	Perimeter_rep2	Solidity_rep1	Solidity_rep2
1	A1BG-AS1	A1BG-AS1	ASO_G0268895_01	Targeted lncRNA	r2b1p1	-0.393216	-0.567563	0.735309	0.687307	0.836577	0.786802	0.944918	0.914619	1.1394	1.21265	1.22959	1.31823	0.760815	0.708837	0.756641	0.697526	0.929251	0.894427	0.942416	0.926334	0.895286	0.85921	0.910391	0.882092	0.786013	0.745518	1.03491	1.0499
2	A1BG-AS1	A1BG-AS1	ASO_G0268895_02	Targeted lncRNA	r2b1p1	0.972483	0.918865	1.11354	1.02435	0.949887	0.925367	0.984913	0.976956	1.0474	1.04808	1.02767	1.07558	1.00902	0.961007	1.01077	0.957095	1.07961	1.03482	1.06432	1.03501	1.0828	1.04754	1.08692	1.05199	1.03018	0.98492	1.00013	1.00954
3	A1BG-AS1	A1BG-AS1	ASO_G0268895_03	Targeted lncRNA	r2b1p1	0.315422	0.219033	0.764652	0.757322	0.793361	0.779908	0.947162	0.942255	1.15489	1.17673	1.26712	1.26727	0.754021	0.751653	0.7525	0.746375	0.981465	0.978449	0.995512	1.0016	0.922454	0.936497	0.942916	0.960567	0.776691	0.770521	1.05506	1.05369
4	A1BG-AS1	A1BG-AS1	ASO_G0268895_04	Targeted lncRNA	r2b1p1	1.00359	0.961913	0.995521	0.905599	0.98219	0.992121	0.994888	1.00402	1.0129	1.00447	1.01821	0.995151	0.990465	0.946411	0.993861	0.945984	1.02263	0.950293	1.02102	0.966611	0.996502	0.963724	0.993054	0.962809	0.975014	0.944539	1.00481	0.989166
5	A1BG-AS1	A1BG-AS1	ASO_G0268895_10	Targeted lncRNA	r2b1p1	1.03969	1.01586	0.933794	0.906303	0.935329	0.928132	0.987368	0.991468	1.02614	1.01873	1.03324	1.03664	0.934942	0.920701	0.936789	0.928796	0.995408	0.994924	0.986996	0.986472	0.994216	0.985635	1.00202	0.992172	0.950863	0.940947	1.00308	0.999494
6	AC004980.7	AC004980.7	ASO_G0205485_01	Targeted lncRNA	r3b2p1	0.855526	0.922025	1.0259	0.910437	0.940803	0.915888	0.976307	0.974682	1.02927	1.01739	1.04059	1.04946	0.969512	0.885973	0.972642	0.889993	1.04054	0.994855	1.01966	0.983761	1.04777	1.00167	1.05554	1.01197	1.00041	0.913057	1.00594	0.999132
7	AC004980.7	AC004980.7	ASO_G0205485_02	Targeted lncRNA	r3b2p1	1.01062	0.904707	0.953533	0.839249	0.962271	0.898936	1.0013	0.973136	1.04925	1.07815	1.10084	1.10945	0.958273	0.850491	0.957302	0.853211	0.98616	0.981756	1.0063	0.985914	0.948075	0.962295	0.957424	0.969218	0.939033	0.857229	1.03947	1.01304
8	AC004980.7	AC004980.7	ASO_G0205485_03	Targeted lncRNA	r3b2p1	0.967856	0.923827	0.922411	0.954324	1.01201	0.901811	0.995223	0.984175	1.02809	1.0776	1.0582	1.10613	0.977257	0.915473	0.966499	0.92217	0.972669	1.03279	0.989647	1.03833	0.959888	1.01256	0.968351	1.02086	0.944178	0.920665	1.01277	1.01859
9	AC004980.7	AC004980.7	ASO_G0205485_05	Targeted lncRNA	r3b2p1	0.867725	0.839048	0.920131	0.861192	1.03613	0.938187	1.00982	0.992755	1.02019	1.03697	1.04605	1.09661	0.990672	0.897248	0.979226	0.895202	0.967552	0.956046	0.982421	0.973059	0.91955	0.938854	0.919645	0.937298	0.937236	0.886144	1.02018	1.01315
10	SPRY4-AS1	AC005592.2	ASO_G0231185_01	Targeted lncRNA	r2b1p2	0.909702	0.948043	0.891154	0.797004	0.8291	0.810484	0.962337	0.95682	1.11944	1.14326	1.14231	1.23348	0.846477	0.795227	0.85278	0.79999	1.0364	1.01019	1.04013	1.02869	1.00655	0.930964	1.01534	0.949586	0.867416	0.794364	1.02647	1.05941
11	SPRY4-AS1	AC005592.2	ASO_G0231185_02	Targeted lncRNA	r2b1p2	0.010594	0.105354	0.634774	0.683129	0.853041	0.936126	0.945973	0.955734	1.15413	1.09071	1.21966	1.12853	0.707348	0.779078	0.686305	0.753181	0.813106	0.811366	0.860911	0.852408	0.835363	0.882132	0.851125	0.896274	0.732846	0.809149	1.01623	0.981861
12	SPRY4-AS1	AC005592.2	ASO_G0231185_03	Targeted lncRNA	r2b1p2	0.194584	-0.012636	0.842045	0.711668	0.851495	0.785411	0.953305	0.946747	1.13287	1.1853	1.22433	1.33155	0.839284	0.737373	0.830588	0.730014	0.994025	0.93233	1.00954	0.968155	0.948232	0.882751	0.956876	0.909668	0.836769	0.740793	1.04848	1.07096
13	SPRY4-AS1	AC005592.2	ASO_G0231185_06	Targeted lncRNA	r2b1p2	1.04524	1.01223	0.971941	0.930194	0.980736	0.98755	0.98521	0.994196	1.03647	1.01281	1.04136	1.01418	0.973151	0.963887	0.970118	0.961991	0.993949	0.981728	0.986721	0.983413	0.995076	0.974752	0.99475	0.97603	0.973445	0.948462	0.996941	1.00114
14	SPRY4-AS1	AC005592.2	ASO_G0231185_09	Targeted lncRNA	r2b1p2	0.933526	1.00043	0.964711	0.91984	0.883791	0.931182	0.966502	0.981267	1.04832	1.02725	1.02967	1.04527	0.899384	0.924155	0.90684	0.92255	1.03515	0.985899	1.01766	0.985902	1.05391	0.993391	1.05452	0.997732	0.949426	0.937113	0.988853	1.00478
15	MAP4K3-DT	AC007246.3	ASO_G0231312_01	Targeted lncRNA	r3b2p2	1.05554	1.07784	0.952872	1.05028	0.926619	0.955943	0.983364	1.0004	1.01089	1.05693	1.03753	1.0409	0.921779	0.99894	0.921004	0.986531	0.983334	1.03661	0.988758	1.03685	1.02111	1.03072	1.02807	1.02499	0.962536	0.992435	1.0034	1.00797
16	MAP4K3-DT	AC007246.3	ASO_G0231312_02	Targeted lncRNA	r3b2p2	0.837974	0.875172	0.886328	0.903533	0.897065	0.895985	0.971018	0.96716	1.07956	1.05299	1.08069	1.08321	0.876444	0.882833	0.86859	0.877731	0.980024	0.984007	0.980093	0.981289	1.0211	1.0199	1.0292	1.02054	0.909323	0.927706	0.99225	0.993528
17	MAP4K3-DT	AC007246.3	ASO_G0231312_03	Targeted lncRNA	r3b2p2	0.911356	1.07737	0.818938	0.967745	0.956623	0.940883	0.994137	0.990486	1.02492	1.05683	1.08667	1.0884	0.893374	0.953078	0.889608	0.945177	0.936956	0.995973	0.960271	1.00553	0.913589	0.990974	0.92535	0.996029	0.867837	0.946452	1.0217	1.01726
18	MAP4K3-DT	AC007246.3	ASO_G0231312_04	Targeted lncRNA	r3b2p2	0.992485	0.89402	0.889069	0.962306	0.973925	1.03591	0.991624	1.02178	1.03417	0.997055	1.08011	1.0268	0.93009	1.00996	0.923248	1.0023	0.959126	0.971415	0.983644	0.988458	0.950485	0.93938	0.961474	0.93577	0.904787	0.966147	1.01505	1.02796
19	MAP4K3-DT	AC007246.3	ASO_G0231312_05	Targeted lncRNA	r3b2p2	0.837035	0.852747	0.929132	0.861972	0.868405	0.899555	0.972374	0.982948	1.0618	1.07751	1.10679	1.12448	0.890929	0.876565	0.890466	0.873932	1.0253	0.977514	1.01489	0.993009	1.04188	0.967517	1.04437	0.973998	0.92176	0.878661	1.0016	1.01817
20	AC007773.2	AC007773.2	ASO_G0267213_01	Targeted lncRNA	r9b8p3	0.481921	0.50846	0.870761	0.849855	0.88867	0.883354	0.958463	0.965822	1.05568	1.05717	1.08934	1.13497	0.855838	0.850985	0.852604	0.853849	0.970686	0.985516	0.961436	0.981814	0.978182	0.957346	0.982014	0.966214	0.899247	0.871231	0.99133	1.00624
21	AC007773.2	AC007773.2	ASO_G0267213_03	Targeted lncRNA	r9b8p3	0.909125	0.990087	0.995948	0.957505	0.965687	0.990014	0.993619	1.00082	0.99224	0.997728	1.0109	1.03302	0.974915	0.984605	0.969625	0.981026	0.997956	0.99566	1.00747	1.0057	1.01151	0.975011	1.02163	0.980557	0.980487	0.967012	0.996922	1.01157
22	AC007773.2	AC007773.2	ASO_G0267213_04	Targeted lncRNA	r9b8p3	0.864924	1.00247	0.996785	1.03146	1.00559	1.02601	1.00061	1.00599	0.989212	0.952894	1.01162	0.957969	1.01055	1.0306	1.01101	1.03216	1.00886	0.975804	1.00889	0.985182	1.02622	1.00417	1.01856	1.0125	1.00504	1.04384	0.99648	0.994694
23	AC007773.2	AC007773.2	ASO_G0267213_06	Targeted lncRNA	r9b8p3	0.815566	0.91135	1.02626	1.03308	1.03171	1.02364	1.00003	1.00459	0.979936	0.977183	0.98087	0.964752	1.02801	1.02935	1.01677	1.02482	0.999019	1.00056	0.98823	0.994119	1.01287	1.01101	1.00743	1.01094	1.02012	1.03354	0.983827	0.985541
24	AC007773.2	AC007773.2	ASO_G0267213_10	Targeted lncRNA	r9b8p3	0.947534	1.01102	0.949181	0.994175	0.997281	1.08637	1.00693	1.02211	0.993445	0.969464	1.03275	0.950081	0.977305	1.05995	0.972693	1.05722	0.973853	0.977005	0.990093	0.982769	0.95545	0.937545	0.964989	0.936915	0.954909	1.01761	1.01498	1.00143
25	MYOSLID	AC007879.7	ASO_G0229647_01	Targeted lncRNA	r2b1p2	0.961493	1.0139	0.964556	0.94558	1.0356	0.98738	1.00723	0.998125	0.967012	1.03437	1.01635	1.05625	1.01359	0.979256	1.00384	0.973155	0.984477	0.994288	0.991321	1.00106	0.959865	0.975076	0.964555	0.980308	0.979791	0.96201	1.01372	1.01377
26	MYOSLID	AC007879.7	ASO_G0229647_02	Targeted lncRNA	r2b1p2	0.974619	0.907601	0.951009	0.966179	0.966353	0.929173	0.986419	0.984232	1.02682	1.08302	1.02994	1.12094	0.960903	0.940533	0.960692	0.933025	0.997579	1.01191	0.992124	1.02418	1.0017	0.981157	1.00305	0.992386	0.95984	0.925348	1.00192	1.03329
27	MYOSLID	AC007879.7	ASO_G0229647_03	Targeted lncRNA	r2b1p2	0.903352	1.00446	0.890487	1.04541	1.01099	0.928227	0.998388	0.991749	0.996312	1.03591	1.03751	1.05379	0.95706	0.973768	0.946673	0.981395	0.958659	1.05421	0.980837	1.04445	0.9452	1.03389	0.950812	1.03563	0.923304	0.978676	1.01656	1.01912
28	MYOSLID	AC007879.7	ASO_G0229647_04	Targeted lncRNA	r2b1p2	0.571353	0.596889	0.822659	0.765522	1.00801	1.03192	0.987864	1.00304	1.03439	1.00623	1.07938	1.07005	0.92339	0.908841	0.90202	0.884912	0.926093	0.882974	0.947286	0.918124	0.922285	0.879835	0.914348	0.879129	0.873877	0.853485	1.01442	1.01167
29	MYOSLID	AC007879.7	ASO_G0229647_06	Targeted lncRNA	r2b1p2	1.07017	1.09652	0.950168	1.0045	0.884656	0.862352	0.963223	0.960758	1.01087	1.04841	1.00213	1.00707	0.901558	0.907612	0.906875	0.917458	1.01114	1.0652	0.995436	1.03504	1.06452	1.08266	1.06989	1.07908	0.975695	0.976929	0.977942	0.983938
30	MYOSLID	AC007879.7	ASO_G0229647_AD_01	Targeted lncRNA	r12b2ADp2	0.888445	0.929641	1.01802	1.03929	0.999937	1.03514	1.00336	1.00055	1.00762	1.00289	1.00407	0.989748	1.01031	1.04423	1.01127	1.0369	0.995144	0.994055	1.00342	0.99247	1.0011	1.00737	0.999623	1.00203	1.01317	1.04769	1.00172	0.989811
31	MYOSLID	AC007879.7	ASO_G0229647_AD_04	Targeted lncRNA	r12b2ADp2	0.821685	0.884136	0.980105	1.04314	1.03685	1.03263	1.0035	1.01624	0.968717	0.959463	0.963252	0.992037	1.00443	1.04957	0.995933	1.04172	0.968614	1.00434	0.972291	1.01079	0.995587	0.999522	0.978536	0.995546	0.987489	1.02474	0.980256	0.996205
32	MYOSLID	AC007879.7	ASO_G0229647_AD_05	Targeted lncRNA	r12b2ADp2	0.887232	0.943724	0.995606	1.07199	0.948363	1.01771	0.99355	1.00035	1.04039	0.979707	1.05636	0.997196	0.973627	1.03574	0.971902	1.03243	1.00693	1.02003	1.02131	1.02376	1.01142	1.0534	1.01448	1.04653	0.973448	1.03689	1.01096	0.99936
33	MYOSLID	AC007879.7	ASO_G0229647_AD_06	Targeted lncRNA	r12b2ADp2	0.809722	0.863369	0.936206	0.994847	1.00458	1.05381	0.99433	1.00487	0.975566	0.958466	0.989848	0.959144	0.958296	1.02705	0.950851	1.01368	0.962829	0.948331	0.961366	0.951971	1.0047	1.00298	0.993698	0.98282	0.962608	1.02324	0.975866	0.972148
34	MYOSLID	AC007879.7	ASO_G0229647_AD_09	Targeted lncRNA	r12b2ADp2	0.263764	0.299704	0.75874	0.873817	1.01187	1.03162	0.98582	0.991625	1.08329	1.02922	1.18374	1.08953	0.905454	0.961254	0.876852	0.939658	0.856274	0.904619	0.923427	0.944796	0.800904	0.88751	0.808068	0.888532	0.819589	0.912333	1.06003	1.03189
35	AC009005.2	AC009005.2	ASO_G0267751_01	Targeted lncRNA	r9b8p5	1.01766	0.936515	0.9472	0.936463	0.979147	0.997087	0.995853	0.993029	1.02867	1.01566	1.05039	1.02989	0.962894	0.972605	0.960992	0.970445	0.988233	0.989345	0.994091	0.988841	0.964602	0.972723	0.966829	0.980367	0.945785	0.963654	1.01126	0.996284
36	AC009005.2	AC009005.2	ASO_G0267751_04	Targeted lncRNA	r9b8p5	0.854851	0.883827	0.930711	0.922787	1.0174	0.981257	0.998942	0.986651	0.989435	1.02686	0.998248	1.07936	0.981002	0.947831	0.969408	0.941007	0.950127	0.975508	0.959591	0.98616	0.98369	0.971942	0.988991	0.977424	0.985267	0.934562	0.97795	1.00937
37	AC009005.2	AC009005.2	ASO_G0267751_06	Targeted lncRNA	r9b8p5	0.742546	0.6835	0.95827	0.927863	1.05274	0.957412	1.00245	0.99437	0.964588	1.03015	0.982864	1.07489	1.01293	0.944918	1.00574	0.937876	0.945635	0.976491	0.953168	0.99061	0.989427	0.973129	0.984386	0.984209	1.0068	0.936702	0.979268	1.01116
38	AC009005.2	AC009005.2	ASO_G0267751_07	Targeted lncRNA	r9b8p5	0.879647	0.773162	0.914127	0.86989	0.967956	1.01947	0.992924	0.999054	1.01949	0.979202	1.03854	1.04784	0.93662	0.955785	0.933235	0.939308	0.968765	0.925898	0.980636	0.943114	0.964493	0.932773	0.970131	0.930794	0.937706	0.929961	1.00079	1.00541
39	AC009005.2	AC009005.2	ASO_G0267751_09	Targeted lncRNA	r9b8p5	0.908315	0.827623	0.903761	0.882182	0.995825	0.979649	0.991984	0.990766	1.0057	1.01062	1.05689	1.05472	0.943841	0.933376	0.93942	0.929467	0.960958	0.945162	0.964495	0.964176	0.967409	0.946497	0.969395	0.956216	0.926229	0.91959	0.999702	1.00748
40	AC009005.2	AC009005.2	ASO_G0267751_AD_01	Targeted lncRNA	r14b9plusp6	0.808994	0.830785	1.01605	1.02575	1.01636	1.10025	0.988713	1.0222	0.989613	0.969575	0.99475	0.96905	1.0166	1.07804	1.01366	1.06543	0.992092	0.964927	0.988142	0.976171	1.04123	0.980076	1.032	0.964986	1.03445	1.04071	0.980243	0.9948
41	AC009005.2	AC009005.2	ASO_G0267751_AD_02	Targeted lncRNA	r14b9plusp6	0.817163	0.846867	1.21318	1.08649	1.16083	1.11721	1.02143	1.02104	0.896418	0.943961	0.87047	0.912107	1.19837	1.11644	1.19714	1.11497	1.02988	1.00232	1.00543	0.993496	1.06766	1.02434	1.04301	1.00672	1.17504	1.09177	0.960323	0.984574
42	AC009005.2	AC009005.2	ASO_G0267751_AD_04	Targeted lncRNA	r14b9plusp6	0.896765	0.868382	1.05211	1.0314	0.999234	0.980722	0.997553	0.985218	1.00704	1.01451	0.994087	1.0281	1.0191	1.00762	1.00812	1.00946	1.00802	1.02625	1.01186	1.01893	1.041	1.04119	1.03796	1.03789	1.02577	1.00959	0.999629	1.0044
43	AC009005.2	AC009005.2	ASO_G0267751_AD_05	Targeted lncRNA	r14b9plusp6	0.811875	0.820415	0.866877	0.793367	0.877382	0.872683	0.964376	0.978857	1.09176	1.09624	1.15766	1.16292	0.866304	0.826426	0.865447	0.827188	1.00498	0.970718	1.0102	0.97813	0.974088	0.918203	0.989317	0.936387	0.87791	0.831643	1.03353	1.03212
44	AC009005.2	AC009005.2	ASO_G0267751_AD_09	Targeted lncRNA	r14b9plusp6	0.933237	0.914028	0.982609	1.01279	1.03175	0.963797	0.997886	0.993705	1.0029	1.02766	1.02506	1.05271	1.01981	0.989483	1.01551	0.984387	0.995984	1.01629	0.998516	1.01979	0.996683	1.0172	0.994804	1.01676	0.997433	0.986354	1.00195	1.0178
45	AC009237.8	AC009237.8	ASO_G0229689_01	Targeted lncRNA	r15bALLp3	0.958219	0.908308	1.00693	1.06496	1.0019	1.03246	0.990916	1.0081	1.01517	0.98993	0.977255	0.96376	0.999637	1.0592	0.994596	1.06149	0.99889	1.02592	1.00176	1.00996	1.02966	1.03498	1.03299	1.02773	1.02597	1.05987	0.988514	0.986795
46	AC009237.8	AC009237.8	ASO_G0229689_02	Targeted lncRNA	r15bALLp3	0.944107	0.966627	1.024	1.04143	1.03208	0.981	0.997308	0.996342	0.976946	1.02008	0.961163	1.01992	1.03173	1.01231	1.03133	1.01974	1.00893	1.03312	1.00159	1.02911	1.03701	1.01631	1.03054	1.02637	1.03618	1.00708	0.982608	1.01407
47	AC009237.8	AC009237.8	ASO_G0229689_03	Targeted lncRNA	r15bALLp3	0.944003	1.12128	1.02175	0.986532	0.955477	0.95726	0.984465	0.997274	1.01197	1.01572	0.953098	1.00027	0.976159	0.971867	0.986669	0.974948	1.01644	1.01837	0.997104	1.00772	1.06463	1.02455	1.06343	1.01703	1.04154	0.993591	0.975515	0.990975
48	AC009237.8	AC009237.8	ASO_G0229689_04	Targeted lncRNA	r15bALLp3	1.00076	1.09829	0.957218	0.934353	0.96956	1.00505	1.00172	0.995599	1.01901	0.994729	1.03155	1.01272	0.963129	0.972059	0.962343	0.963802	1.00978	0.983112	1.00554	0.995261	0.994451	0.999817	0.996689	0.995407	0.965715	0.965061	1.00572	0.986615
49	AC009237.8	AC009237.8	ASO_G0229689_07	Targeted lncRNA	r15bALLp3	1.05247	0.936475	0.932142	1.03841	1.0062	1.05552	0.98745	1.00765	0.966919	0.97339	0.975694	0.931443	0.963218	1.04661	0.961421	1.04638	0.979345	0.995416	0.971072	0.98933	1.02073	1.01268	1.01316	1.0074	0.981442	1.04972	0.97551	0.979051
50	CHROMR	AC009948.5	ASO_G0223960_01	Targeted lncRNA	r3b2p6	1.05603	0.986675	0.944506	0.900063	0.973836	1.03735	0.991815	1.01125	1.0561	0.942886	1.03035	0.998767	0.95172	0.96835	0.950746	0.963182	1.0006	0.951578	0.997006	0.96463	0.977114	0.934182	0.980272	0.934782	0.945163	0.930403	0.99968	1.00767
51	CHROMR	AC009948.5	ASO_G0223960_03	Targeted lncRNA	r3b2p6	1.03755	0.937109	0.928243	0.841168	1.05477	0.986177	1.00146	0.992127	0.965304	1.00038	0.989315	1.10112	0.994476	0.914948	0.98631	0.906426	0.943465	0.929714	0.965024	0.959659	0.964009	0.905692	0.968205	0.918514	0.967423	0.873535	0.995654	1.02794
52	CHROMR	AC009948.5	ASO_G0223960_04	Targeted lncRNA	r3b2p6	0.942933	0.944273	0.956306	0.943764	0.960733	0.996997	0.98792	0.992924	1.02722	0.995852	1.02257	1.0108	0.955016	0.968041	0.951488	0.964146	0.978714	0.989849	0.973166	0.991852	0.998616	0.98764	1.00554	0.989292	0.964312	0.958938	1.00015	1.0047
53	CHROMR	AC009948.5	ASO_G0223960_08	Targeted lncRNA	r3b2p6	0.874215	0.841292	0.839866	0.877773	0.883013	0.867376	0.966282	0.958537	1.08978	1.09569	1.20545	1.18379	0.859407	0.865186	0.860607	0.869554	0.994351	1.01197	1.01976	1.02058	0.913237	0.969475	0.934437	0.990237	0.838323	0.869244	1.05385	1.04302
54	CHROMR	AC009948.5	ASO_G0223960_AD_01	Targeted lncRNA	r12b2ADp1	0.976499	0.93944	0.932564	0.966236	1.01263	0.996741	0.982399	1.0054	0.992895	1.01678	0.979167	1.02666	0.959083	0.982724	0.953692	0.984069	0.943648	0.985642	0.936594	0.99217	0.99963	0.948269	1.00542	0.957882	0.989561	0.970784	0.970136	1.01884
55	CHROMR	AC009948.5	ASO_G0223960_AD_03	Targeted lncRNA	r12b2ADp1	0.879191	0.868701	0.978488	0.979726	1.08643	1.03421	1.00722	0.990628	0.973343	0.972813	0.976311	0.969609	1.02889	0.991739	1.01729	0.981751	0.967748	0.956136	0.967077	0.95686	0.979021	1.00964	0.973875	1.00155	1.00636	1.00815	0.988739	0.974116
56	CHROMR	AC009948.5	ASO_G0223960_AD_04	Targeted lncRNA	r12b2ADp1	0.836149	0.831651	1.20962	1.05677	1.03937	1.05162	0.998146	1.00309	0.958311	0.976783	0.93686	0.95601	1.10341	1.04295	1.09542	1.03016	1.05354	1.00232	1.03267	0.99279	1.09356	1.01907	1.07896	1.01816	1.11783	1.04368	0.974788	0.982608
57	CHROMR	AC009948.5	ASO_G0223960_AD_05	Targeted lncRNA	r12b2ADp1	0.86749	0.903643	1.02933	1.04599	1.0627	1.08504	1.00968	1.01273	0.975337	0.953124	0.941504	0.939341	1.0473	1.04886	1.04256	1.04703	0.989567	0.967493	0.990823	0.964818	1.00513	1.00802	0.988383	0.993466	1.03289	1.05477	0.986767	0.980547
58	CHROMR	AC009948.5	ASO_G0223960_AD_10	Targeted lncRNA	r12b2ADp1	0.775582	0.724322	1.11912	1.05708	1.05454	1.11875	1.00558	0.993658	0.97352	0.931386	0.966329	0.896114	1.06158	1.07162	1.05444	1.05622	1.01243	0.951893	1.00273	0.937432	1.04377	1.05631	1.03824	1.03559	1.06521	1.09479	0.985556	0.938699
59	ZNF232-AS1	AC012146.7	ASO_G0234327_01	Targeted lncRNA	r6b5p3	0.86326	0.847138	1.02468	0.974782	0.973913	0.975487	0.990993	1.00354	1.0175	1.0181	1.01383	1.02179	0.992221	0.97039	0.990199	0.956079	1.03985	0.988384	1.02442	0.987731	1.03056	1.00038	1.03554	0.994345	0.998696	0.975086	0.997511	0.994602
60	ZNF232-AS1	AC012146.7	ASO_G0234327_06	Targeted lncRNA	r6b5p3	0.870624	0.759603	0.930085	0.970828	0.954635	0.98139	1.00491	0.993381	1.01415	1.02844	1.06061	1.06893	0.946387	0.972463	0.946183	0.966445	1.00037	0.99214	1.00626	0.999957	0.963578	0.987073	0.961376	0.982242	0.930366	0.953004	1.02155	1.00944
61	ZNF232-AS1	AC012146.7	ASO_G0234327_07	Targeted lncRNA	r6b5p3	0.440342	0.43073	0.825246	0.761799	0.898408	0.844161	0.970579	0.964248	1.07748	1.12127	1.15548	1.22383	0.85639	0.791996	0.841439	0.776437	0.938448	0.928218	0.957736	0.960592	0.97842	0.919621	0.978767	0.942559	0.863038	0.797916	1.01211	1.04644
62	ZNF232-AS1	AC012146.7	ASO_G0234327_08	Targeted lncRNA	r6b5p3	0.701698	0.71426	0.923222	0.928648	0.942009	0.929355	0.987343	0.98587	1.03711	1.05378	1.09642	1.11356	0.920691	0.921082	0.904611	0.914336	0.97314	1.0112	0.976789	1.01612	0.990157	0.991627	0.992726	1.0022	0.925083	0.911137	1.01123	1.02521
63	ZNF232-AS1	AC012146.7	ASO_G0234327_10	Targeted lncRNA	r6b5p3	0.780105	0.81862	1.00229	0.962339	0.962902	0.98141	0.990293	0.997273	1.01406	1.01576	1.02465	1.03656	0.971803	0.963309	0.958168	0.959346	1.00741	1.01048	0.99516	1.00679	1.04215	1.01327	1.03721	1.00973	0.989935	0.965028	0.9831	1.00112
64	LINC01535	AC012309.5	ASO_G0226686_01	Targeted lncRNA	r4b4p4	1.06494	0.972521	0.934017	0.995757	1.03316	0.959183	0.994237	0.989503	0.977809	1.01662	0.939429	1.01903	0.970852	0.97367	0.968899	0.981406	0.931244	1.01092	0.928939	1.01234	0.965459	1.00477	0.96181	1.00599	0.980175	0.987595	0.964486	1.00929
65	LINC01535	AC012309.5	ASO_G0226686_03	Targeted lncRNA	r4b4p4	0.991085	0.888993	0.955813	0.960279	0.940648	0.945818	0.981675	0.987966	1.03665	1.02188	1.04691	1.05795	0.933057	0.943879	0.933447	0.944802	1.00154	1.00853	0.999462	1.01423	0.997229	1.01719	1.00214	1.02001	0.948713	0.950667	1.00186	1.01384
66	LINC01535	AC012309.5	ASO_G0226686_04	Targeted lncRNA	r4b4p4	0.882553	0.959823	0.967843	0.968964	1.04363	0.930832	1.00441	0.974725	1.00093	1.04614	0.985552	1.05535	1.00231	0.935945	0.995376	0.939642	0.955428	1.01155	0.961667	1.00292	0.968929	1.02532	0.956683	1.03406	0.979892	0.953088	0.986873	1.00473
67	LINC01535	AC012309.5	ASO_G0226686_05	Targeted lncRNA	r4b4p4	1.04938	0.925005	0.916182	1.038	0.954598	0.961615	0.975855	0.990288	1.04833	1.02336	1.0669	1.04146	0.91585	0.994881	0.908222	0.9976	0.952862	1.03029	0.958827	1.03428	0.987444	1.03042	0.992236	1.02369	0.933713	0.994403	0.994498	1.01189
68	LINC01535	AC012309.5	ASO_G0226686_07	Targeted lncRNA	r4b4p4	0.844332	0.952837	0.924907	0.972985	0.890345	0.908661	0.979059	0.974991	1.0781	1.04804	1.09468	1.09546	0.892907	0.918666	0.902017	0.920609	0.992813	1.03024	1.00416	1.02818	0.966163	1.00972	0.977656	1.02345	0.909813	0.936466	1.02697	1.02795
69	LINC01578	AC013394.2	ASO_G0272888_01	Targeted lncRNA	r14b9plusp3	0.930287	0.967559	1.01652	0.91884	0.993071	0.977487	0.988777	1.00156	1.02312	1.04229	0.987653	1.01548	0.998021	0.955083	1.00344	0.961942	0.994806	0.961786	0.989005	0.972147	1.01482	0.948282	1.01919	0.960082	1.02476	0.96209	0.993293	1.01228
70	LINC01578	AC013394.2	ASO_G0272888_02	Targeted lncRNA	r14b9plusp3	0.969946	0.925335	0.945993	0.909127	0.964248	0.930285	0.996711	0.980856	1.02387	1.06427	1.06203	1.12368	0.962641	0.917299	0.961502	0.915561	0.990371	0.986516	1.00979	1.00588	0.975406	0.964312	0.980319	0.973504	0.943974	0.908885	1.02079	1.02662
71	LINC01578	AC013394.2	ASO_G0272888_04	Targeted lncRNA	r14b9plusp3	1.04125	1.01361	1.03134	1.08548	0.992482	0.957145	0.995629	0.984649	0.977685	1.00345	0.983838	1.03082	1.0053	1.00529	1.0056	1.00486	1.01239	1.04284	1.00443	1.02976	1.03391	1.0865	1.02786	1.07672	1.01976	1.0324	0.984828	0.996756
72	LINC01578	AC013394.2	ASO_G0272888_05	Targeted lncRNA	r14b9plusp3	0.993541	1.00245	0.93882	0.990004	0.959766	0.974026	0.991274	0.996156	1.0144	1.04035	1.03722	1.02757	0.952345	0.976449	0.95263	0.976951	0.983672	1.00438	0.991146	1.00698	0.988409	1.00686	0.993099	1.00978	0.961916	0.984566	1.00351	1.01047
73	LINC01578	AC013394.2	ASO_G0272888_08	Targeted lncRNA	r14b9plusp3	1.01187	1.01608	1.00564	0.926813	1.01729	0.951025	1.00234	0.987809	0.984823	1.03307	0.980434	1.05604	1.01451	0.930851	1.01881	0.929198	0.986841	0.98343	0.982067	0.988146	0.998137	0.98038	0.997176	0.982759	1.01791	0.935202	0.989764	1.01262
74	LINC01578	AC013394.2	ASO_G0272888_AD_04	Targeted lncRNA	r12b2ADp6	0.940497	0.982804	0.925431	0.891118	0.983571	1.01767	0.990365	0.990442	1.03892	1.00235	1.04076	1.00576	0.950351	0.950754	0.948283	0.947928	0.985318	0.959504	0.98888	0.956816	0.969874	0.964125	0.970686	0.963643	0.946297	0.940196	1.01449	0.991163
75	LINC01578	AC013394.2	ASO_G0272888_AD_06	Targeted lncRNA	r12b2ADp6	0.968871	0.922257	0.876145	0.970113	0.976067	0.980054	0.995435	0.985305	1.04083	0.989755	1.08651	1.0101	0.929492	0.973098	0.919458	0.973496	0.973988	1.00329	0.985879	0.992125	0.938866	1.01883	0.947862	1.0177	0.902661	0.984936	1.02202	0.992255
76	LINC01578	AC013394.2	ASO_G0272888_AD_07	Targeted lncRNA	r12b2ADp6	0.911694	0.908204	0.915012	0.890304	0.994965	0.942071	0.993857	0.986538	1.02667	1.03553	1.03749	1.04958	0.968235	0.917244	0.965079	0.921924	0.961237	0.960357	0.96624	0.979661	0.976925	0.964	0.979683	0.97558	0.967179	0.921604	0.99001	1.01466
77	LINC01578	AC013394.2	ASO_G0272888_AD_09	Targeted lncRNA	r12b2ADp6	1.00802	1.03389	1.06834	0.973371	1.07966	1.06281	1.01613	1.01026	0.898674	0.955999	0.965197	0.988856	1.08566	1.02874	1.08816	1.02124	1.00428	0.95992	0.999545	0.969819	1.00955	0.961845	1.00489	0.963501	1.06502	1.0069	1.00488	1.0048
78	LINC01578	AC013394.2	ASO_G0272888_AD_10	Targeted lncRNA	r12b2ADp6	0.850879	0.791487	0.956668	0.93525	1.04017	1.00558	1.00659	1.00247	0.970065	1.0047	1.04449	1.04032	1.00757	0.98009	0.998061	0.976183	0.983902	0.976197	0.98813	0.988886	0.981441	0.957964	0.979188	0.957417	0.976149	0.949013	1.00593	1.01476
79	AC016747.3	AC016747.3	ASO_G0212978_01	Targeted lncRNA	r2b1p3	0.853685	0.82889	0.851708	0.897278	0.895926	0.893882	0.971653	0.973122	1.03715	1.04031	1.08924	1.06165	0.865367	0.887491	0.872664	0.897648	1.00461	1.01311	0.998469	1.01431	0.983983	1.00259	0.988111	1.011	0.877942	0.913687	1.00583	1.00814
80	AC016747.3	AC016747.3	ASO_G0212978_02	Targeted lncRNA	r2b1p3	0.891317	0.857644	0.919274	0.979718	0.980284	1.0557	1.00383	1.0116	0.976764	0.951225	0.983089	0.927747	0.947044	1.02349	0.953909	1.02433	0.976417	0.984498	0.976289	0.977009	0.973542	0.990882	0.969808	0.985606	0.952195	1.01908	0.994732	0.978728
81	AC016747.3	AC016747.3	ASO_G0212978_03	Targeted lncRNA	r2b1p3	0.695744	0.623489	1.38142	1.19192	1.29749	1.26855	1.04698	1.04747	0.948092	0.930734	0.903005	0.918559	1.36703	1.26965	1.34645	1.2508	1.03749	0.99054	1.05991	1.01043	1.00845	0.948645	0.99161	0.931453	1.24934	1.14736	1.00587	1.01139
82	AC016747.3	AC016747.3	ASO_G0212978_04	Targeted lncRNA	r2b1p3	0.944786	0.908775	0.970691	0.893961	1.04628	1.02081	1.00091	1.00205	0.996429	0.987379	1.04203	0.991535	1.01508	0.965553	1.00327	0.960906	0.981343	0.944256	0.990077	0.958351	0.981024	0.983162	0.979042	0.975961	0.982513	0.959499	1.00421	0.981037
83	AC016747.3	AC016747.3	ASO_G0212978_06	Targeted lncRNA	r2b1p3	0.892528	0.911374	0.920152	0.885072	0.96477	1.01338	1.00246	1.00983	1.02923	0.969785	1.05276	0.985037	0.941114	0.950934	0.940535	0.946661	0.98723	0.952888	0.99533	0.954193	0.977378	0.964771	0.984555	0.960654	0.94175	0.943231	1.01637	0.989838
84	LINC01116	AC017048.3	ASO_G0163364_01	Targeted lncRNA	r1b0p1	1.0933	0.810256	0.964526	0.955627	0.946407	0.966676	0.994539	0.983912	1.00631	1.07458	1.03413	1.01599	0.954225	0.954407	0.960372	0.958573	0.999994	0.99724	1.01679	0.983278	1.00034	1.01243	1.00692	1.02192	0.956611	0.974082	1.01857	0.990628
85	LINC01116	AC017048.3	ASO_G0163364_02	Targeted lncRNA	r1b0p1	0.974089	1.04611	0.897171	0.964003	0.999482	1.00277	1.00494	1.00211	0.948566	1.04258	1.03218	1.02811	0.961812	0.997094	0.957176	0.989557	0.959146	0.987497	0.978386	0.991107	0.941192	0.986531	0.939967	0.985251	0.923867	0.982205	1.01422	1.00619
86	LINC01116	AC017048.3	ASO_G0163364_03	Targeted lncRNA	r1b0p1	0.961778	0.989023	0.987896	1.05256	0.881237	0.912151	0.976874	0.988504	1.10681	1.05268	1.10651	1.09921	0.924351	0.970195	0.922455	0.971735	1.03162	1.04345	1.03357	1.04833	1.04951	1.05295	1.05706	1.05228	0.953217	0.981092	1.01684	1.02311
87	LINC01116	AC017048.3	ASO_G0163364_04	Targeted lncRNA	r1b0p1	1.05203	0.980151	0.939912	0.940167	0.964004	0.991753	0.991095	1.00539	1.0436	0.978238	1.05441	1.03236	0.958135	0.976955	0.958781	0.978383	0.994518	0.959264	1.00233	0.976312	0.993779	0.954305	0.997285	0.958319	0.959587	0.960361	1.00616	1.01308
88	LINC01116	AC017048.3	ASO_G0163364_06	Targeted lncRNA	r1b0p1	0.367872	0.452701	0.869853	1.01535	0.880639	0.921201	0.959941	0.967757	1.08936	1.09194	1.17115	1.11976	0.871858	0.959215	0.86024	0.944541	0.989505	1.0262	1.00574	1.02392	1.00774	1.07549	1.01236	1.07386	0.865564	0.970897	1.01913	0.99846
89	LINC01116	AC017048.3	ASO_G0163364_AD_01	Targeted lncRNA	r10b0ADp1	0.629101	0.260644	0.966475	0.838348	0.903287	0.904387	0.976486	0.959231	1.0582	1.08417	1.11494	1.19166	0.937612	0.865923	0.952246	0.866461	1.06376	1.00294	1.04032	0.999708	0.9942	0.932199	1.00098	0.942796	0.938978	0.841606	1.0264	1.03096
90	LINC01116	AC017048.3	ASO_G0163364_AD_02	Targeted lncRNA	r10b0ADp1	1.01197	0.958474	0.898135	1.02703	1.01499	1.01534	1.00477	0.997088	0.977431	1.00796	1.05269	1.03484	0.963746	1.02742	0.95765	1.02002	0.966751	1.02665	0.981254	1.01517	0.924112	1.01939	0.929839	1.01448	0.924819	1.01056	1.02344	1.00559
91	LINC01116	AC017048.3	ASO_G0163364_AD_03	Targeted lncRNA	r10b0ADp1	0.952615	0.858132	1.03566	1.00522	0.998146	1.04142	0.986707	0.999826	0.992085	0.952849	0.997901	0.979496	1.00819	1.02373	1.01211	1.01471	1.03007	0.972847	1.01764	0.974499	1.0519	1.01358	1.04859	1.01239	1.01846	1.02792	0.987487	0.985366
92	LINC01116	AC017048.3	ASO_G0163364_AD_09	Targeted lncRNA	r10b0ADp1	0.88681	0.821227	0.966728	0.915282	0.997414	0.976736	0.992757	0.986631	0.993685	1.02894	1.0274	1.07922	0.975679	0.938719	0.963805	0.925329	0.978799	0.976295	0.984167	0.99213	1.00358	0.967842	0.997619	0.974742	0.968481	0.919096	0.995045	1.01528
93	LINC01116	AC017048.3	ASO_G0163364_AD_10	Targeted lncRNA	r10b0ADp1	0.968568	0.855439	1.01754	1.00945	0.949848	0.988031	0.992864	0.99171	1.0327	1.00161	1.0702	1.03209	0.978447	0.995762	0.970204	0.987976	1.02968	0.995543	1.03313	0.999166	1.03031	1.01601	1.02542	1.01785	0.978905	1.00072	1.01123	1.00146
94	LINC01117	AC017048.4	ASO_G0224577_01	Targeted lncRNA	r14b9plusp3	0.928128	0.905008	1.16936	0.997767	1.00035	0.94748	0.987309	0.987891	0.998786	1.03255	1.02689	1.04877	1.05553	0.963501	1.05615	0.965655	1.06038	1.01747	1.05174	1.01696	1.10167	1.01604	1.10439	1.02089	1.06979	0.972642	1.00145	1.01312
95	LINC01117	AC017048.4	ASO_G0224577_02	Targeted lncRNA	r14b9plusp3	0.660499	0.686186	0.925629	0.881785	0.949384	0.953154	0.983048	0.994762	1.02124	1.02955	1.09087	1.11333	0.94074	0.927007	0.943289	0.923677	1.01658	0.983655	1.01601	1.0084	1.01335	0.953076	1.0099	0.949706	0.925718	0.889327	1.01044	1.03023
96	LINC01117	AC017048.4	ASO_G0224577_03	Targeted lncRNA	r14b9plusp3	0.971211	0.909476	0.987188	0.970331	0.975067	1.02087	0.990945	0.998099	1.02047	0.985363	1.03762	0.992704	0.974314	0.996948	0.977126	0.994471	1.01615	0.981059	1.01496	0.981489	1.00487	1.01209	1.0107	1.005	0.961364	0.995827	1.00613	0.989526
97	LINC01117	AC017048.4	ASO_G0224577_04	Targeted lncRNA	r14b9plusp3	0.778049	0.711312	1.04863	1.0826	0.952859	0.998248	0.987014	0.994395	1.02265	0.997971	1.03526	1.02509	0.983308	1.03203	0.979806	1.0213	1.03354	1.0339	1.02019	1.02791	1.07129	1.06551	1.06142	1.05693	1.00191	1.03617	0.993259	0.993692
98	LINC01117	AC017048.4	ASO_G0224577_05	Targeted lncRNA	r14b9plusp3	0.917971	0.918953	0.954372	0.999913	0.958686	0.999138	0.98618	1.00603	1.02706	1.00256	1.05661	1.02312	0.957515	1.00589	0.954347	1.00942	0.994288	1.0004	0.996717	1.00594	1.00463	0.991898	1.00778	0.992114	0.961677	1.00076	1.0063	1.01669
99	LINC01117	AC017048.4	ASO_G0224577_AD_02	Targeted lncRNA	r10b0ADp1	1.02459	0.975147	0.904641	1.03001	0.921581	0.909825	0.982177	0.978267	1.03472	1.01373	1.05759	1.02584	0.904759	0.943964	0.907599	0.952324	0.991997	1.04114	0.995032	1.02111	0.981329	1.05496	0.988844	1.0553	0.918948	0.982304	1.00797	0.989152
100	LINC01117	AC017048.4	ASO_G0224577_AD_05	Targeted lncRNA	r10b0ADp1	0.893061	0.942863	1.02334	1.03539	0.968839	0.987788	0.992238	0.992447	0.975134	0.991693	0.989637	0.947479	0.993259	1.00117	0.98847	0.999113	1.02021	0.996409	1.01056	0.984419	1.04865	1.0599	1.04021	1.05723	1.01238	1.05312	0.985759	0.97648
101	LINC01117	AC017048.4	ASO_G0224577_AD_08	Targeted lncRNA	r10b0ADp1	0.97535	0.975822	1.03851	1.00969	0.982722	0.957937	0.98771	0.992258	0.995387	1.02308	1.02518	1.02654	0.99988	0.973542	0.997262	0.981106	1.02736	1.02323	1.02096	1.01464	1.03309	1.0015	1.03409	1.00642	1.0072	0.984221	1.00368	1.01351
102	LINC01117	AC017048.4	ASO_G0224577_AD_09	Targeted lncRNA	r10b0ADp1	0.913315	0.989994	1.0437	1.08695	1.00173	0.971025	0.998239	0.990503	0.97743	1.01598	0.994958	1.01698	1.02081	1.02099	1.01844	1.0231	1.01939	1.044	1.01711	1.03518	1.04968	1.05869	1.04483	1.05441	1.02411	1.04075	0.986099	1.00155
103	LINC01117	AC017048.4	ASO_G0224577_AD_10	Targeted lncRNA	r10b0ADp1	0.943707	1.06409	0.987134	0.979445	0.98052	0.978221	0.994833	0.989719	1.05199	1.00859	1.05815	1.04348	0.98331	0.974203	0.975568	0.971994	1.01399	1.0023	1.01878	1.00771	0.988321	0.985097	0.988749	0.984312	0.966108	0.963711	1.01675	1.01251
104	AC018464.3	AC018464.3	ASO_G0234520_01	Targeted lncRNA	r6b5p3	0.870136	0.900725	0.990066	0.964617	0.994856	0.999078	1.01162	0.995272	1.00573	1.01517	1.00497	0.990973	0.994584	0.975934	0.991741	0.971665	0.996571	0.984855	1.00357	0.980756	0.971909	0.994008	0.96929	0.996867	0.980236	0.989421	1.00838	0.98808
105	AC018464.3	AC018464.3	ASO_G0234520_04	Targeted lncRNA	r6b5p3	0.951748	0.995839	0.999363	1.09387	0.99025	0.955492	1.00771	0.995928	1.01526	1.01138	1.0273	1.00296	0.999505	1.01716	0.990604	1.02038	1.00362	1.05343	1.01408	1.04587	0.976759	1.06251	0.97772	1.06563	0.974476	1.04355	1.02332	1.00428
106	AC018464.3	AC018464.3	ASO_G0234520_05	Targeted lncRNA	r6b5p3	0.812537	0.930805	1.00815	1.03368	0.97783	0.938439	0.99701	0.996218	1.03652	1.02046	1.05169	1.00966	0.982107	0.981895	0.977994	0.982627	1.01349	1.03492	1.02726	1.03152	1.00063	1.0196	1.00345	1.02684	0.975161	0.995419	1.01954	1.00671
107	AC018464.3	AC018464.3	ASO_G0234520_06	Targeted lncRNA	r6b5p3	0.842267	0.950343	0.994619	1.09722	0.999289	0.962301	1.0034	1.00044	1.00676	1.01874	1.05207	1.03227	1.00514	1.02929	0.994529	1.03435	1.01154	1.06612	1.01455	1.04999	0.991129	1.01494	0.984985	1.02018	0.976113	1.02981	1.0054	1.02885
108	AC018464.3	AC018464.3	ASO_G0234520_08	Targeted lncRNA	r6b5p3	0.829998	0.903883	0.956992	1.09186	0.999872	1.01754	0.997298	1.00134	1.01675	0.985397	1.02519	0.99021	0.983552	1.05505	0.972484	1.05893	0.978248	1.04602	0.978798	1.03079	0.99983	1.01936	0.984324	1.0245	0.971716	1.05763	0.981664	1.0156
109	LSP1P4	AC027612.6	ASO_G0143429_01	Targeted lncRNA	r2b1p4	1.03235	0.89784	0.988327	0.952326	1.01183	0.958281	1.00217	0.980533	1.03284	1.03599	1.04109	1.06495	1.01451	0.956043	1.00627	0.948227	0.994922	0.989098	1.00141	0.998577	0.967049	1.0119	0.974564	1.00574	0.981886	0.959942	1.0139	0.998305
110	LSP1P4	AC027612.6	ASO_G0143429_03	Targeted lncRNA	r2b1p4	0.522318	0.690339	1.19769	0.94323	0.925384	0.92662	0.975087	0.99428	1.00146	1.07716	0.964166	1.09157	1.02592	0.946616	1.03865	0.946179	1.13986	1.00583	1.07885	1.01845	1.20051	0.975094	1.18763	0.986158	1.10985	0.939754	0.963313	1.02694
111	LSP1P4	AC027612.6	ASO_G0143429_04	Targeted lncRNA	r2b1p4	0.90633	0.922422	0.895861	1.0016	0.847619	0.980359	0.965523	0.99829	1.09805	1.03668	1.1324	1.02688	0.860124	0.995017	0.868385	0.99069	1.04933	1.00194	1.04372	1.00734	0.991994	1.00277	1.00387	1.00387	0.876519	0.986873	1.02126	1.00464
112	LSP1P4	AC027612.6	ASO_G0143429_05	Targeted lncRNA	r2b1p4	0.79821	0.881332	1.09878	0.863425	0.887243	0.841835	0.960723	0.971953	0.983223	1.09352	0.908131	1.1598	0.933752	0.853755	0.9534	0.865594	1.0945	1.05503	1.03452	1.05553	1.19073	0.976158	1.17323	0.988193	1.07234	0.853983	0.941843	1.04068
113	LSP1P4	AC027612.6	ASO_G0143429_06	Targeted lncRNA	r2b1p4	1.0091	1.09022	1.05897	1.10212	0.98509	1.00146	1.00173	1.00299	1.04739	0.942705	1.0003	0.898479	1.03087	1.05791	1.03085	1.07426	1.02636	1.04429	1.01737	1.01883	1.02335	1.07379	1.02184	1.05625	1.0424	1.09599	0.999422	0.96483
114	LSP1P4	AC027612.6	ASO_G0143429_AD_01	Targeted lncRNA	r12b2ADp1	0.941511	0.984889	1.03997	0.993503	1.13183	1.05029	1.01463	1.00507	0.914189	0.958368	0.871804	0.918961	1.08661	1.01949	1.08577	1.01936	0.967144	0.973047	0.951396	0.959645	0.997063	1.02075	0.978646	1.00283	1.08524	1.04461	0.957284	0.964719
115	LSP1P4	AC027612.6	ASO_G0143429_AD_02	Targeted lncRNA	r12b2ADp1	0.985182	0.935785	1.01817	0.962743	1.06286	1.06549	1.01791	1.00574	0.950666	0.953988	0.93216	0.965966	1.04175	1.01447	1.04587	1.00904	0.983432	0.960765	0.980653	0.960983	0.984873	0.971323	0.979535	0.970848	1.03057	1.00297	0.982902	0.985544
116	LSP1P4	AC027612.6	ASO_G0143429_AD_03	Targeted lncRNA	r12b2ADp1	0.965163	0.901548	1.02542	0.940703	1.03366	1.06005	1.00063	1.00346	0.950156	0.980373	0.96359	0.96531	1.02251	1.00731	1.02745	0.99937	0.996613	0.955646	0.985739	0.955819	1.01282	0.964776	1.00319	0.957861	1.02611	0.982254	0.991878	0.984941
117	LSP1P4	AC027612.6	ASO_G0143429_AD_05	Targeted lncRNA	r12b2ADp1	0.857864	0.868627	0.956462	1.01235	1.01901	1.04826	0.999946	1.00863	0.993582	0.993084	0.994539	0.964983	0.98393	1.02206	0.986034	1.01558	0.969355	0.97341	0.967078	0.975194	0.953932	0.987444	0.946867	0.983998	0.979722	1.02222	0.999054	0.989993
118	LSP1P4	AC027612.6	ASO_G0143429_AD_06	Targeted lncRNA	r12b2ADp1	0.999306	0.954331	1.03168	0.969036	1.0307	1.07229	1.00326	1.01031	0.962981	0.965294	1.00685	0.973496	1.03574	1.03066	1.02912	1.02297	0.993224	0.954133	1.00792	0.96295	0.998976	0.97756	0.990977	0.970332	1.01798	1.0009	1.00615	0.989211
119	AC046143.3	AC046143.3	ASO_G0229334_03	Targeted lncRNA	r6b5p1	0.247026	0.248945	0.731199	0.725539	0.812061	0.870589	0.939985	0.950525	1.18657	1.1654	1.26578	1.29665	0.744899	0.7899	0.728807	0.773493	0.912176	0.89079	0.931992	0.92951	0.918873	0.862234	0.941113	0.88675	0.780332	0.779777	1.03809	1.05313
120	AC046143.3	AC046143.3	ASO_G0229334_05	Targeted lncRNA	r6b5p1	0.540414	0.486015	0.905047	0.819848	0.915829	0.916596	0.978187	0.988953	1.07983	1.07544	1.13704	1.16536	0.896532	0.868159	0.879859	0.852958	0.938019	0.914231	0.957069	0.950579	0.978478	0.915625	0.977276	0.921556	0.916518	0.85664	1.02003	1.03534
121	AC046143.3	AC046143.3	ASO_G0229334_06	Targeted lncRNA	r6b5p1	0.725738	0.740318	0.931801	0.983187	0.987091	1.01429	1	0.996673	1.05772	1.01609	1.12016	1.05968	0.966311	1.01027	0.943955	0.996257	0.948617	0.97905	0.983086	0.997842	0.950505	0.990457	0.94638	0.989613	0.948371	0.984813	1.03055	1.01093
122	AC046143.3	AC046143.3	ASO_G0229334_08	Targeted lncRNA	r6b5p1	0.774421	0.778183	0.937557	0.947607	1.02191	0.983465	0.996312	0.996708	1.00632	1.02943	1.03017	1.07183	0.971827	0.960203	0.955946	0.943893	0.953993	0.968403	0.954005	0.985034	0.996874	0.977678	0.987683	0.986425	0.971972	0.943208	0.989611	1.01211
123	AC084219.4	AC084219.4	ASO_G0186019_01	Targeted lncRNA	r5b3p3	0.959815	1.0177	0.986471	1.06589	0.942276	1.01098	0.986723	1.0067	1.02367	0.981203	1.02426	1.00189	0.95331	1.03421	0.956832	1.03262	1.01815	1.02062	1.01368	1.02354	1.01769	1.01125	1.02387	1.01456	0.969612	1.03486	1.00386	1.01084
124	AC084219.4	AC084219.4	ASO_G0186019_02	Targeted lncRNA	r5b3p3	0.937552	0.951539	0.8689	0.944325	0.933835	0.958787	0.97527	0.9978	1.02686	1.02727	1.08146	1.03788	0.896957	0.953258	0.892202	0.95368	0.961038	0.9628	0.968573	0.971643	0.957988	0.962595	0.973727	0.983272	0.903427	0.965775	1.01461	1.01706
125	AC084219.4	AC084219.4	ASO_G0186019_03	Targeted lncRNA	r5b3p3	0.958901	0.983365	0.97418	1.03091	0.950895	1.04943	0.993628	1.01718	1.01568	0.995815	1.06932	0.99787	0.968278	1.05688	0.964169	1.05069	0.998625	0.988392	1.01037	1.01053	0.994479	0.964527	1.01091	0.974102	0.968468	1.01591	1.02179	1.01708
126	AC084219.4	AC084219.4	ASO_G0186019_06	Targeted lncRNA	r5b3p3	0.911323	0.939585	0.914108	0.958693	0.949409	0.963303	0.991131	0.98863	1.07283	1.01227	1.07204	1.01604	0.929114	0.947336	0.923408	0.947631	0.958372	0.987755	0.969108	0.988168	0.968224	1.01941	0.980835	1.02587	0.940791	0.984558	1.01641	0.995949
127	AC084219.4	AC084219.4	ASO_G0186019_09	Targeted lncRNA	r5b3p3	0.873097	0.994888	0.925067	0.982775	0.967251	0.928349	0.986395	0.989788	1.03431	1.05852	1.06716	1.06918	0.943991	0.949542	0.933088	0.941741	0.978464	1.01565	0.993579	1.013	0.978682	1.018	0.983283	1.02245	0.92923	0.95817	1.01362	1.00989
128	ZFAND2A-DT	AC091729.9	ASO_G0229043_01	Targeted lncRNA	r3b2p6	0.980052	1.07447	0.94523	1.00794	0.972615	1.02316	1.0038	1.00466	0.993137	0.988896	1.00524	1.00623	0.957812	1.01839	0.959259	1.0171	0.987509	0.999396	0.989029	1.00168	0.988177	0.98129	0.995281	0.983072	0.95957	1.00088	1.0021	1.00294
129	ZFAND2A-DT	AC091729.9	ASO_G0229043_02	Targeted lncRNA	r3b2p6	0.952996	0.903448	0.916573	0.886884	0.896226	0.861075	0.980089	0.969401	1.04492	1.06919	1.06582	1.1141	0.889146	0.856791	0.887436	0.862507	0.991976	1.00521	0.999279	1.01954	1.00766	0.999955	1.01224	1.01583	0.911284	0.880901	1.00193	1.02171
130	ZFAND2A-DT	AC091729.9	ASO_G0229043_03	Targeted lncRNA	r3b2p6	0.919038	0.901646	1.02225	0.960219	1.08117	1.05511	1.01758	1.0159	0.946566	0.993339	0.987378	1.00712	1.06661	1.02243	1.05986	1.01862	1.00354	0.978873	1.00362	0.976596	0.961907	0.938506	0.960735	0.938104	1.01484	0.973028	1.01543	1.01567
131	ZFAND2A-DT	AC091729.9	ASO_G0229043_06	Targeted lncRNA	r3b2p6	0.961212	0.926045	0.998023	0.943003	1.07061	1.03596	1.01863	0.996852	1.04469	1.0408	1.02369	1.06463	1.05746	0.989059	1.04933	0.976973	0.975727	0.977525	0.996868	0.98384	0.951598	0.95307	0.950179	0.96492	0.998999	0.945034	1.02208	1.01617
132	ZFAND2A-DT	AC091729.9	ASO_G0229043_07	Targeted lncRNA	r3b2p6	0.918025	0.906885	0.965953	0.956804	0.968349	0.938242	0.999585	0.981587	1.00298	1.03304	1.03394	1.09363	0.956123	0.945964	0.958244	0.943939	0.994928	1.00599	0.996975	1.02431	0.996537	0.997806	0.996287	1.00493	0.955588	0.934083	1.00751	1.03133
133	ZFAND2A-DT	AC091729.9	ASO_G0229043_AD_01	Targeted lncRNA	r13b3ADp3	0.970324	0.974406	0.960981	0.896966	0.996759	1.01714	1.00106	1.01085	1.01299	1.0114	1.00412	1.02236	0.985645	0.966135	0.984006	0.959872	0.981113	0.950829	0.98621	0.968228	0.969719	0.925394	0.968834	0.929523	0.981192	0.9366	1.00048	1.01481
134	ZFAND2A-DT	AC091729.9	ASO_G0229043_AD_04	Targeted lncRNA	r13b3ADp3	0.97844	0.940081	1.00533	1.04693	0.952938	0.947347	0.997403	0.976679	1.01593	1.0507	0.992772	1.05511	0.974547	0.982224	0.974092	0.981781	1.01081	1.02847	0.999385	1.02368	1.01163	1.05015	1.00604	1.05479	0.992063	1.00861	0.994099	1.00628
135	ZFAND2A-DT	AC091729.9	ASO_G0229043_AD_05	Targeted lncRNA	r13b3ADp3	0.929572	0.876182	1.07055	1.00619	0.991582	0.968944	0.999856	0.992277	1.00326	1.02972	0.991353	1.05764	1.02863	0.980573	1.02548	0.976898	1.02974	1.00689	1.02102	1.01414	1.04246	1.01953	1.04263	1.01391	1.0431	0.9828	0.995877	1.00288
136	ZFAND2A-DT	AC091729.9	ASO_G0229043_AD_06	Targeted lncRNA	r13b3ADp3	0.953665	0.916254	1.07756	0.951776	0.971086	0.987055	0.994647	0.985202	1.02892	1.04147	1.04216	1.06909	1.00959	0.963599	1.01295	0.956845	1.03148	0.981261	1.04171	0.9948	1.02037	0.975442	1.01835	0.987322	1.01049	0.952941	1.01602	1.01342
137	ZFAND2A-DT	AC091729.9	ASO_G0229043_AD_10	Targeted lncRNA	r13b3ADp3	1.04049	1.01806	1.04669	0.948863	1.00821	0.96562	0.99659	0.990636	0.996634	1.01099	1.00089	1.05753	1.02663	0.957537	1.02916	0.959891	1.02126	0.993378	1.01594	0.988819	1.0342	0.996822	1.0327	0.996895	1.03409	0.960831	0.999885	1.00097
138	ZNF529-AS1	AC092295.7	ASO_G0233527_01	Targeted lncRNA	r6b5p2	0.922271	1.00093	1.03603	1.1188	0.998116	1.0269	0.999496	1.00613	1.01674	0.985137	1.01311	0.924638	1.01937	1.07106	1.01451	1.07691	1.00251	1.03081	1.01104	1.00945	1.016	1.0667	1.01488	1.06318	1.01104	1.11095	1.00018	0.970005
139	ZNF529-AS1	AC092295.7	ASO_G0233527_02	Targeted lncRNA	r6b5p2	0.774452	0.767252	0.894123	0.877999	0.989115	0.943542	0.988166	0.984413	1.04261	1.0798	1.04003	1.14456	0.939563	0.909331	0.925811	0.889409	0.929961	0.960181	0.943879	0.975324	0.973949	0.946924	0.967745	0.95055	0.940495	0.890501	0.987769	1.02942
140	ZNF529-AS1	AC092295.7	ASO_G0233527_03	Targeted lncRNA	r6b5p2	0.694093	0.718356	0.873533	0.933767	0.934461	0.960169	0.994002	0.994685	1.08257	1.04096	1.15372	1.07296	0.903107	0.942683	0.884558	0.92912	0.955004	0.964982	0.995029	0.988449	0.943455	0.99682	0.957113	0.996303	0.87381	0.940077	1.04376	1.01365
141	ZNF529-AS1	AC092295.7	ASO_G0233527_05	Targeted lncRNA	r6b5p2	0.45551	0.486157	0.872942	0.86837	0.895712	0.899279	0.976861	0.965991	1.11935	1.11791	1.2058	1.14331	0.875878	0.87196	0.864201	0.859631	0.973152	0.96062	1.00565	0.96715	0.934198	0.954257	0.949471	0.964454	0.853992	0.888834	1.05823	1.02654
142	ZNF529-AS1	AC092295.7	ASO_G0233527_07	Targeted lncRNA	r6b5p2	0.851313	0.896661	0.98469	1.02419	1.03012	1.02073	1.01155	1.00139	1.02051	0.9953	1.04411	0.997714	1.01476	1.02812	1.01105	1.02439	0.994995	1.0008	1.00878	0.991612	0.946988	1.01186	0.943685	1.00819	0.972208	1.02311	1.03276	0.995672
143	ITGA9-AS1	AC093415.2	ASO_G0235257_01	Targeted lncRNA	r6b5p4	0.872497	0.82418	0.952079	1.00955	1.07257	0.995293	1.00985	0.991488	1.00124	0.983216	1.04175	1.00388	1.03121	0.989408	1.01824	0.985596	0.97471	1.00024	0.991188	0.984633	0.960504	1.03978	0.958885	1.03453	0.977479	1.00731	1.01687	0.980618
144	ITGA9-AS1	AC093415.2	ASO_G0235257_04	Targeted lncRNA	r6b5p4	0.636784	0.631233	0.913522	0.819101	1.06334	1.02428	1.00934	1.00613	1.01483	1.02496	1.0825	1.11235	0.995549	0.935878	0.97464	0.918869	0.94138	0.910748	0.963487	0.951154	0.936867	0.8677	0.933541	0.874001	0.938535	0.865614	1.02582	1.03828
145	ITGA9-AS1	AC093415.2	ASO_G0235257_06	Targeted lncRNA	r6b5p4	0.757798	0.692358	0.988448	0.897123	0.995366	0.956302	0.994472	0.998815	1.03368	1.0399	1.08006	1.09005	0.992815	0.924999	0.97696	0.910322	1.00446	0.963764	1.01718	0.984928	1.00755	0.947599	1.01448	0.960958	0.974128	0.906627	1.01662	1.0202
146	ITGA9-AS1	AC093415.2	ASO_G0235257_07	Targeted lncRNA	r6b5p4	0.697837	0.723863	0.872202	0.912801	0.982363	1.0141	0.998067	0.999355	1.05433	1.03306	1.11669	1.08546	0.936276	0.969348	0.922599	0.956836	0.945626	0.954743	0.981595	0.969548	0.922066	0.962859	0.930782	0.963604	0.899523	0.937119	1.02861	1.00998
147	ITGA9-AS1	AC093415.2	ASO_G0235257_09	Targeted lncRNA	r6b5p4	0.755779	0.708676	0.957778	0.923465	1.01086	0.931206	0.992009	0.985908	1.02813	1.0584	1.06369	1.10996	0.988898	0.93023	0.963774	0.915519	0.966803	1.00604	0.969215	1.01696	1.02169	1.01336	1.00646	1.02313	0.980586	0.921185	0.988312	1.0111
148	AC093627.10	AC093627.10	ASO_G0240859_03	Targeted lncRNA	r7b6p6	0.912002	0.914799	1.00793	0.961803	1.02017	1.01318	0.999922	0.994931	0.997652	0.997875	0.989987	1.00553	1.01267	0.987736	1.00692	0.982781	1.00048	0.973039	0.993352	0.969826	1.00636	0.978593	1.0037	0.975657	1.01014	0.983853	0.98701	0.995014
149	AC093627.10	AC093627.10	ASO_G0240859_04	Targeted lncRNA	r7b6p6	0.823595	0.815341	1.04115	0.969383	0.985959	0.929278	0.993354	0.97492	1.02448	1.04623	1.03027	1.08861	1.01522	0.94337	1.00665	0.935717	1.01184	1.00175	1.01195	1.00408	1.01947	1.02929	1.01893	1.03121	1.00944	0.95572	1.00575	1.0082
150	AC093627.10	AC093627.10	ASO_G0240859_05	Targeted lncRNA	r7b6p6	0.717367	0.68183	0.974933	0.924194	0.896935	0.944508	0.981511	0.982433	1.08633	1.05161	1.10934	1.12662	0.920308	0.931941	0.919909	0.92092	1.02557	0.990611	1.02101	1.0045	1.02497	0.979748	1.04013	0.985402	0.938061	0.917778	1.01783	1.02447
151	AC093627.10	AC093627.10	ASO_G0240859_08	Targeted lncRNA	r7b6p6	0.809426	0.772975	1.02183	1.0721	1.04253	0.987771	1.00812	0.999593	1.0192	1.00743	1.02449	1.04826	1.03893	1.0278	1.0227	1.01415	0.993605	1.03312	0.998289	1.04049	0.99849	1.04226	0.996757	1.03809	1.0146	1.01041	1.00957	1.02374
152	AC093627.10	AC093627.10	ASO_G0240859_09	Targeted lncRNA	r7b6p6	0.745503	0.770431	1.04631	0.950025	0.991858	0.975469	1.00015	1.00587	1.03369	1.04889	1.05366	1.09856	1.02341	0.976106	1.01106	0.962253	1.01337	0.989934	1.0257	1.01527	1.03075	0.950581	1.02777	0.962371	1.0144	0.936013	1.01161	1.03463
153	AC093627.9	AC093627.9	ASO_G0242474_01	Targeted lncRNA	r7b6p2	0.934147	0.982729	1.0189	1.00075	1.0261	1.00953	1.00484	1.00257	0.963088	0.986883	0.986275	0.986129	1.02788	1.00817	1.01892	1.00259	1.01436	0.993365	0.997035	0.987791	1.03289	1.02041	1.01648	1.01696	1.01567	1.01386	0.976356	0.987944
154	AC093627.9	AC093627.9	ASO_G0242474_02	Targeted lncRNA	r7b6p2	0.782837	0.810119	0.991482	0.926772	0.960545	0.963184	0.993043	0.99721	1.00501	1.00738	1.02471	1.05531	0.97839	0.94593	0.97472	0.933421	1.02526	0.99156	1.013	0.993835	1.02799	0.968314	1.01438	0.969204	0.980078	0.92069	0.990925	1.00903
155	AC093627.9	AC093627.9	ASO_G0242474_04	Targeted lncRNA	r7b6p2	0.748408	0.792668	0.994988	0.981239	0.947286	0.956085	0.990214	0.993509	1.01981	1.02861	1.0816	1.07161	0.967237	0.965415	0.962477	0.952599	1.01818	0.996805	1.01423	1.00826	1.02128	1.00055	1.02369	0.998518	0.970119	0.956871	1.0069	1.01299
156	AC093627.9	AC093627.9	ASO_G0242474_05	Targeted lncRNA	r7b6p2	0.74478	0.835848	0.973452	0.976435	0.936221	0.974572	0.977614	0.985144	1.03592	1.04841	1.09869	1.09197	0.950294	0.975985	0.934741	0.965138	1.01325	1.00564	1.01669	1.00954	1.01292	0.998243	1.01508	1.0038	0.938632	0.963723	1.009	1.0115
157	AC093627.9	AC093627.9	ASO_G0242474_06	Targeted lncRNA	r7b6p2	0.753547	0.861612	1.0238	0.988564	0.987565	0.997521	0.998655	1.00141	0.991055	1.00609	0.991716	1.03384	1.00823	1.00188	1.00316	0.993622	1.01661	0.982382	1.0079	0.993564	1.05556	0.981676	1.05131	0.981128	1.01396	0.985008	0.979509	1.00328
158	RNASEH1-AS1	AC108488.3	ASO_G0234171_01	Targeted lncRNA	r3b2p2	0.998078	0.940105	0.967944	0.967558	1.01778	0.949055	1.00326	0.986863	1.03256	1.00088	1.03135	1.03728	0.998939	0.950841	0.988906	0.947084	0.974313	1.0015	0.991121	0.996923	0.992233	1.03498	0.995598	1.02814	0.981526	0.966568	1.00129	0.988189
159	RNASEH1-AS1	AC108488.3	ASO_G0234171_02	Targeted lncRNA	r3b2p2	-0.271085	-0.22457	0.538752	0.568187	0.701377	0.683847	0.912854	0.882859	1.27493	1.29466	1.4596	1.52884	0.588219	0.593159	0.574314	0.582774	0.85553	0.888423	0.897247	0.921534	0.793238	0.827258	0.826628	0.862931	0.61103	0.627824	1.07304	1.08769
160	RNASEH1-AS1	AC108488.3	ASO_G0234171_03	Targeted lncRNA	r3b2p2	0.95034	1.05735	0.979031	0.900644	1.00069	0.935786	0.997676	0.998846	1.02779	1.05621	1.07039	1.07013	1.00581	0.919233	1.00147	0.915861	0.987894	0.969344	1.00055	0.977602	0.979414	0.966106	0.984035	0.972809	0.984657	0.924382	1.01555	1.01622
161	RNASEH1-AS1	AC108488.3	ASO_G0234171_06	Targeted lncRNA	r3b2p2	0.76056	0.788412	0.786772	0.804432	0.815473	0.841992	0.954204	0.969895	1.1407	1.13713	1.24748	1.21498	0.777257	0.801645	0.771877	0.794709	0.970057	0.960968	0.992469	0.981531	0.948947	0.936587	0.969764	0.950353	0.797662	0.81579	1.03732	1.03544
162	RNASEH1-AS1	AC108488.3	ASO_G0234171_09	Targeted lncRNA	r3b2p2	0.194081	0.318778	0.668408	0.660629	0.839999	0.792101	0.958412	0.942771	1.18696	1.22372	1.35726	1.43778	0.75369	0.720694	0.734888	0.707373	0.904124	0.91414	0.945822	0.965656	0.821821	0.837133	0.849999	0.865538	0.716388	0.685086	1.07217	1.09272
163	AC108488.4	AC108488.4	ASO_G0242282_06	Targeted lncRNA	r7b6p6	0.977155	1.01373	1.00209	1.01274	0.96616	0.936598	0.994039	0.991654	1.05206	1.05465	1.02602	1.04835	0.98171	0.969228	0.971284	0.969288	1.0018	1.01313	1.0028	1.01304	1.01492	1.02762	1.01552	1.02929	0.992854	0.993999	1.00216	1.00879
164	AC108488.4	AC108488.4	ASO_G0242282_07	Targeted lncRNA	r7b6p6	0.993115	0.954777	1.08292	1.07528	1.01925	0.99637	1.00987	0.996832	0.981922	1.00686	0.964	0.982264	1.04591	1.02747	1.0452	1.03391	1.0169	1.02252	1.01008	1.02806	1.05049	1.02785	1.04232	1.03118	1.06315	1.04523	0.991553	1.0013
165	AC108488.4	AC108488.4	ASO_G0242282_08	Targeted lncRNA	r7b6p6	0.829966	0.787248	0.956948	0.977933	0.934068	0.972383	0.989228	0.997644	1.06299	1.0194	1.06925	1.0353	0.942769	0.973644	0.938937	0.969427	1.00975	0.993308	1.0096	0.997363	1.00251	0.987518	1.00717	0.99591	0.953728	0.985954	1.0121	1.00825
166	AC108488.4	AC108488.4	ASO_G0242282_09	Targeted lncRNA	r7b6p6	0.849847	0.921972	0.967474	1.0055	0.931586	0.992302	0.984505	1.00242	1.04125	1.0017	1.07544	1.01885	0.947218	0.992207	0.942518	0.993932	1.00484	0.983015	1.01207	0.983556	1.00675	0.987773	1.01948	0.997476	0.958585	1.00468	1.01592	1.01189
167	AC108488.4	AC108488.4	ASO_G0242282_10	Targeted lncRNA	r7b6p6	0.652434	0.628333	0.858985	0.886413	0.797088	0.818799	0.950483	0.950426	1.14308	1.12983	1.22135	1.2031	0.810131	0.836925	0.814061	0.845242	1.03866	1.04063	1.03995	1.03327	0.992012	0.997981	1.01654	1.01746	0.835623	0.867858	1.04522	1.04323
168	AC112721.2	AC112721.2	ASO_G0222032_01	Targeted lncRNA	r4b4p6	0.88863	0.848692	0.904545	0.970991	0.936116	0.977883	0.990843	0.991054	1.04548	1.03494	1.10684	1.05186	0.920938	0.97222	0.913642	0.969963	0.999427	1.01311	1.01482	1.01692	0.964697	0.997927	0.980902	1.00376	0.902671	0.95501	1.03063	1.01144
169	AC112721.2	AC112721.2	ASO_G0222032_02	Targeted lncRNA	r4b4p6	0.957158	0.85325	1.03787	1.10781	0.985091	1.05044	1.00171	1.00344	1.01855	0.997468	1.05859	1.01276	1.00748	1.0849	1.00233	1.07648	1.01591	1.04505	1.02335	1.04514	1.01006	1.0134	1.01827	1.02106	1.00078	1.04382	1.02142	1.01354
170	AC112721.2	AC112721.2	ASO_G0222032_03	Targeted lncRNA	r4b4p6	0.987372	0.915038	0.911005	0.932043	0.953904	0.968717	0.990789	0.998299	1.04861	1.03781	1.08299	1.07562	0.925565	0.958498	0.927533	0.959072	0.994283	0.968688	0.999562	0.985499	0.953243	0.952479	0.968016	0.960573	0.906027	0.951687	1.02103	1.02407
171	AC112721.2	AC112721.2	ASO_G0222032_06	Targeted lncRNA	r4b4p6	0.949952	0.950921	1.04306	0.947283	0.951393	1.01021	0.995838	1.00317	1.04428	1.01368	1.06373	1.01436	0.993465	0.9781	0.99584	0.97974	1.04906	0.99314	1.04601	0.997742	1.02079	0.972803	1.03281	0.977381	0.988535	0.957734	1.01866	1.0089
172	AC112721.2	AC112721.2	ASO_G0222032_10	Targeted lncRNA	r4b4p6	0.995681	0.94847	0.989257	0.98112	0.97348	0.975943	1.0023	0.999028	1.03714	1.03018	1.05729	1.09095	0.999296	0.986887	1.00136	0.9774	1.02964	1.02074	1.04268	1.03915	0.979555	0.987462	0.986916	0.988654	0.967188	0.940472	1.02701	1.02473
173	AC124789.1	AC124789.1	ASO_G0260833_01	Targeted lncRNA	r3b2p4	1.02382	1.05681	1.02403	0.988136	0.948841	0.974437	0.985256	0.993035	0.988149	1.01836	1.009	1.0129	0.982976	0.986222	0.988715	0.987948	1.03897	1.01649	1.02657	1.00513	1.05247	1.01269	1.05536	1.01158	1.0044	0.994382	0.996203	1.00037
174	AC124789.1	AC124789.1	ASO_G0260833_02	Targeted lncRNA	r3b2p4	0.868388	0.936922	1.03921	0.914956	0.94129	0.921877	0.973178	0.986055	1.00755	1.00906	1.04416	1.0783	0.981113	0.916404	0.985032	0.914517	1.05562	0.99693	1.03439	0.994864	1.072	0.983049	1.07542	0.992151	1.00541	0.926692	0.999983	1.01646
175	AC124789.1	AC124789.1	ASO_G0260833_03	Targeted lncRNA	r3b2p4	0.924121	1.00168	0.90492	0.895339	0.957591	1.00123	0.981426	1.0002	1.04702	0.991762	1.09845	1.06489	0.931184	0.944043	0.92721	0.935441	0.985477	0.964422	1.00144	0.98485	0.979422	0.939681	0.984572	0.951306	0.920706	0.911607	1.02101	1.02518
176	AC124789.1	AC124789.1	ASO_G0260833_06	Targeted lncRNA	r3b2p4	-0.18744	-0.322208	0.638545	0.641003	0.784331	0.76614	0.939995	0.927983	1.20808	1.219	1.38417	1.43297	0.692917	0.695218	0.6718	0.678262	0.869432	0.87228	0.929612	0.937001	0.79407	0.803514	0.828605	0.834248	0.667446	0.67689	1.08359	1.0873
177	AC124789.1	AC124789.1	ASO_G0260833_07	Targeted lncRNA	r3b2p4	0.84604	0.891263	0.95165	0.898595	0.941615	0.913358	0.982686	0.985647	1.0143	1.05977	1.0728	1.11087	0.95098	0.910979	0.946377	0.915967	1.016	1.00434	1.01964	1.01289	1.02777	0.965282	1.03086	0.980262	0.954526	0.902911	1.0124	1.0333
178	AC124789.1	AC124789.1	ASO_G0260833_AD_01	Targeted lncRNA	r16bALLp1	0.981737	1.00295	1.02436	0.963679	0.947211	0.96411	0.987903	0.987276	1.03604	1.02353	1.01975	1.02818	0.976726	0.955153	0.978028	0.953688	1.03609	0.9928	1.02697	0.996979	1.03229	0.994136	1.03382	0.999597	0.997739	0.967564	1.00161	0.995984
179	AC124789.1	AC124789.1	ASO_G0260833_AD_05	Targeted lncRNA	r16bALLp1	1.05725	1.05063	1.05438	1.01588	1.0201	1.03191	1.00667	1.00406	0.989412	0.964652	0.950333	0.940098	1.0377	1.0254	1.03695	1.02643	0.994188	0.978976	0.98617	0.978185	1.03855	1.00682	1.03596	1.00241	1.05492	1.0375	0.977776	0.98267
180	AC124789.1	AC124789.1	ASO_G0260833_AD_06	Targeted lncRNA	r16bALLp1	1.07639	1.0455	1.06434	1.00154	1.00123	1.0353	0.994834	0.998122	1.01921	0.969838	0.986396	0.961384	1.03551	1.01431	1.03649	1.00956	1.01403	0.976613	1.01592	0.980547	1.02432	1.0056	1.02444	1.00635	1.03912	1.01831	0.997636	0.985623
181	AC124789.1	AC124789.1	ASO_G0260833_AD_07	Targeted lncRNA	r16bALLp1	1.07697	0.994339	1.04716	1.11307	1.06254	1.02246	1.00712	1.00188	0.963198	1.0122	0.979628	0.994589	1.06407	1.07686	1.05306	1.07286	1.00166	1.02319	1.01167	1.03049	1.0104	1.02469	1.00259	1.02837	1.04365	1.05983	0.994481	1.00758
182	AC124789.1	AC124789.1	ASO_G0260833_AD_10	Targeted lncRNA	r16bALLp1	0.891612	0.857406	1.00399	1.01524	0.946299	0.942207	0.978438	0.975443	1.04028	1.02768	1.04352	1.0271	0.965787	0.96317	0.974922	0.965739	1.03988	1.02865	1.02771	1.01364	1.03078	1.06199	1.03742	1.06074	0.986196	1.01178	1.00232	0.992912
183	AC144652.1	AC144652.1	ASO_G0273117_01	Targeted lncRNA	r14b9plusp3	0.921378	0.964183	0.99137	1.01451	1.01707	0.980255	1.00582	0.993796	1.01327	1.03174	1.01769	1.03611	1.01433	0.999032	1.01333	0.995869	0.987092	1.00777	0.994942	1.02021	0.971093	1.00704	0.974529	1.01183	0.993472	0.99134	1.00892	1.01442
184	AC144652.1	AC144652.1	ASO_G0273117_03	Targeted lncRNA	r14b9plusp3	0.961875	0.909179	1.06863	0.958067	0.980972	1.04705	0.993325	1.0107	1.00775	1.00239	1.03747	1.01083	1.01804	1.01868	1.01668	1.00937	1.02887	0.975715	1.02456	0.984981	1.05267	0.951752	1.05472	0.952349	1.02798	0.978246	1.00809	1.01086
185	AC144652.1	AC144652.1	ASO_G0273117_06	Targeted lncRNA	r14b9plusp3	0.967608	0.917556	0.950719	1.00319	1.00496	0.976206	1.00165	0.983679	0.981004	1.01094	1.01533	1.04003	0.987372	0.986499	0.97886	0.989551	0.979745	1.00503	0.977334	1.00256	0.998853	1.04168	0.988705	1.04338	0.980264	1.00182	0.995219	1.00218
186	AC144652.1	AC144652.1	ASO_G0273117_09	Targeted lncRNA	r14b9plusp3	0.945662	0.869601	0.988741	0.953229	1.01304	0.973264	1.00434	0.993734	1.01993	1.02891	1.02828	1.05364	1.00859	0.960329	0.99938	0.96083	0.979936	0.991382	0.994187	0.999285	0.981645	0.994272	0.982233	0.997895	0.979246	0.948522	1.01132	1.00852
187	AC144652.1	AC144652.1	ASO_G0273117_10	Targeted lncRNA	r14b9plusp3	0.865199	0.833369	0.946868	0.979624	1.06081	1.02493	1.00387	0.988936	0.972671	0.996592	1.01117	1.03212	1.00907	1.00086	1.00382	0.994791	0.948476	0.970197	0.960246	0.972501	0.955068	1.0091	0.956891	1.00229	0.975642	0.985607	0.998712	0.995552
188	AHR	AHR	ASO_C0011632_01	Positive Control	r5b3p1	1.10391	1.02754	1.03393	0.965867	0.93254	0.997206	0.981529	0.989554	1.06333	1.02792	1.04558	0.986492	0.972913	0.978396	0.975589	0.977387	1.04139	0.986848	1.03219	0.983062	1.05446	0.995482	1.06073	1.00622	1.00014	0.999814	1.00645	0.997223
189	AHR	AHR	ASO_C0011632_03	Positive Control	r5b3p1	0.91525	0.922726	0.913081	0.945381	0.876944	0.875336	0.965417	0.970781	1.10019	1.08721	1.15674	1.12612	0.880933	0.899911	0.879677	0.902226	1.03509	1.04893	1.03095	1.04019	1.00614	1.03217	1.02126	1.04341	0.884288	0.920038	1.02805	1.0215
190	AHR	AHR	ASO_C0011632_05	Positive Control	r5b3p1	0.987791	1.04173	0.897027	1.0099	0.945755	1.04449	0.983457	1.00965	1.05405	0.967136	1.11376	1.01331	0.918577	1.02319	0.912914	1.02149	0.977819	0.966158	0.996549	0.983064	0.943059	0.9601	0.95649	0.967654	0.899139	1.0032	1.03463	1.01809
191	AHR	AHR	ASO_C0011632_06	Positive Control	r5b3p1	0.971414	0.964196	1.05989	1.04916	0.986324	1.02996	0.995693	1.00788	1.00769	1.00998	1.01749	0.977086	1.01198	1.04337	1.01084	1.04519	1.01621	1.00033	1.01667	1.0071	1.01892	0.987704	1.02957	0.992553	1.01521	1.02712	1.00764	1.00451
192	AHR	AHR	ASO_C0011632_10	Positive Control	r5b3p1	0.92759	0.960157	0.936605	0.988564	0.908943	1.02267	0.981881	1.00383	1.05199	1.04546	1.07821	0.998288	0.907893	1.00355	0.911494	1.00242	1.00771	0.991205	1.00999	0.9907	1.01771	1.00138	1.03226	1.00591	0.928788	1.0025	1.01746	1.00232
193	AHR	AHR	ASO_C0011632_AD_01	Positive Control	r13b3ADp1	0.910325	0.86546	0.954905	1.02661	1.07232	1.03649	1.01445	1.00387	0.999773	1.00281	1.00684	0.990292	1.02009	1.03113	1.01294	1.02918	0.954024	0.988338	0.967261	0.985949	0.954911	0.999221	0.947913	0.997826	0.988508	1.02906	0.996104	0.991219
194	AHR	AHR	ASO_C0011632_AD_03	Positive Control	r13b3ADp1	0.848486	0.840196	1.06539	0.959211	1.04573	1.03998	1.01049	1.00256	1.00697	1	0.988502	0.998156	1.05266	1.00385	1.04475	1.00096	1.00476	0.939667	0.99604	0.94782	1.02065	0.97019	1.01129	0.97764	1.04479	1.00425	0.98716	0.988091
195	AHR	AHR	ASO_C0011632_AD_07	Positive Control	r13b3ADp1	0.823349	0.798892	0.935383	1.08972	1.02644	0.991331	1.00221	0.995436	1.00093	1.05398	1.0192	1.06755	0.989191	1.0333	0.980397	1.02115	0.957846	1.02707	0.97197	1.03421	0.972075	1.04879	0.973179	1.05024	0.969402	1.02868	0.997603	1.00816
196	AHR	AHR	ASO_C0011632_AD_08	Positive Control	r13b3ADp1	0.84166	0.866977	1.0162	0.894639	1.04641	0.981947	1.00729	0.988853	1.01358	1.04554	1.00811	1.04644	1.03562	0.936161	1.02395	0.930895	0.990673	0.957324	0.988684	0.970464	0.997294	0.947778	0.991519	0.952121	1.01822	0.927497	0.99172	1.00721
197	AHR	AHR	ASO_C0011632_AD_10	Positive Control	r13b3ADp1	0.851639	0.910365	1.01398	1.06164	1.11765	1.00394	1.02049	0.988868	0.95348	1.02084	0.950521	1.01345	1.08378	1.02577	1.07075	1.02022	0.960177	1.01029	0.972952	1.00717	0.961229	1.05012	0.959816	1.05082	1.04286	1.03662	0.993859	0.993248
198	AMZ2P1	AMZ2P1	ASO_G0214174_02	Targeted lncRNA	r5b3p5	1.07594	1.10007	0.945029	0.978872	0.912225	0.913853	0.964911	0.976896	1.05812	1.04984	1.03362	1.04035	0.902548	0.933669	0.902653	0.935126	0.9988	1.01965	0.989299	1.01266	1.06843	1.04562	1.07325	1.0523	0.960879	0.976781	0.970774	0.984042
199	AMZ2P1	AMZ2P1	ASO_G0214174_03	Targeted lncRNA	r5b3p5	0.973077	1.07819	1.03133	0.950669	0.988178	0.935137	0.998261	0.98793	1.00777	1.02005	1.02002	1.09618	1.00921	0.938957	1.00673	0.934989	1.00822	1.0109	1.00193	1.01945	1.02243	0.992073	1.03534	1.00079	1.0215	0.929442	1.00275	1.02564
200	AMZ2P1	AMZ2P1	ASO_G0214174_05	Targeted lncRNA	r5b3p5	0.908508	0.87283	1.02229	0.959522	1.05527	0.951935	1.01056	0.982895	1.01597	1.04405	0.993097	1.05215	1.05273	0.951777	1.04401	0.950244	1.00926	0.996483	1.00673	1.00337	0.994587	1.00937	0.991002	1.02781	1.02774	0.962845	1.00027	0.999341
201	AMZ2P1	AMZ2P1	ASO_G0214174_06	Targeted lncRNA	r5b3p5	0.894288	0.774514	0.958524	0.985282	0.923731	0.947394	0.982351	0.992619	1.06387	1.05532	1.05499	1.07954	0.937907	0.974993	0.941922	0.971952	1.01602	1.02807	1.02337	1.0347	1.02712	0.995114	1.04118	1.00203	0.95798	0.95795	1.00605	1.01972
202	AMZ2P1	AMZ2P1	ASO_G0214174_09	Targeted lncRNA	r5b3p5	0.905081	0.923223	0.950967	0.958819	1.02257	0.964746	1.01273	0.995734	1.01761	1.00534	1.02923	1.07333	1.00891	0.963259	1.00674	0.962513	0.971432	1.01677	0.99044	1.023	0.94053	0.978222	0.948897	0.98721	0.971915	0.937691	1.01614	1.02967
203	AP000704.5	AP000704.5	ASO_G0224790_02	Targeted lncRNA	r15bALLp2	1.03503	1.17437	0.925015	0.933629	1.02555	0.986782	0.997516	0.989043	0.991187	0.990603	0.991528	0.991882	0.981518	0.95	0.975011	0.944836	0.969406	0.97526	0.969212	0.964127	0.988698	1.02136	0.986654	1.01043	0.970502	0.982766	0.982525	0.972431
204	AP000704.5	AP000704.5	ASO_G0224790_03	Targeted lncRNA	r15bALLp2	0.95265	0.992508	0.979283	0.997624	1.00857	1.03276	0.994279	0.995933	1.02546	1.03199	1.01892	1.00212	0.997732	1.01797	0.993578	1.01309	0.983024	0.986263	0.993505	0.988613	0.984865	0.980135	0.985057	0.977292	0.989964	1.00908	1.00105	0.99987
205	AP000704.5	AP000704.5	ASO_G0224790_07	Targeted lncRNA	r15bALLp2	0.989669	0.977332	0.942891	0.980053	0.95234	0.991635	0.983502	1.00001	1.03123	0.999674	1.07795	1.025	0.943788	0.98694	0.946838	0.980776	1.00602	0.996376	1.01395	0.999879	0.976021	0.985194	0.98317	0.985727	0.932424	0.972369	1.01969	1.00888
206	AP000704.5	AP000704.5	ASO_G0224790_08	Targeted lncRNA	r15bALLp2	1.0426	0.947095	0.97052	0.989053	0.949586	1.00282	0.978877	0.987632	1.02341	1.01711	1.07541	1.04683	0.948004	1.00154	0.951036	0.990909	1.01615	1.00228	1.01478	1.00633	1.00803	0.992743	1.01343	0.989379	0.949974	0.983786	1.01108	1.00956
207	AP000704.5	AP000704.5	ASO_G0224790_10	Targeted lncRNA	r15bALLp2	0.991232	0.950825	0.913195	0.96966	0.964677	0.986717	0.987868	0.992007	1.02858	1.0194	1.0704	1.03389	0.944225	0.986914	0.936841	0.980399	0.988942	0.995039	1.00101	1.0076	0.959411	0.982308	0.964314	0.981902	0.921838	0.969065	1.01886	1.01183
208	FAM111A-DT	AP001258.4	ASO_G0245571_01	Targeted lncRNA	r3b2p3	1.09286	0.989941	0.975508	0.966552	0.962105	1.00963	0.977112	1.00393	1.03711	0.99509	1.04647	1.02736	0.96479	0.995763	0.959185	0.994199	0.999906	0.980846	1.00152	0.992746	1.03621	0.971961	1.03585	0.972555	0.993265	0.975204	0.995941	1.01108
209	FAM111A-DT	AP001258.4	ASO_G0245571_03	Targeted lncRNA	r3b2p3	0.998033	0.883333	0.979881	0.976604	0.959165	1.00031	0.990415	1.01096	1.02102	0.986675	1.05509	1.03791	0.976252	0.992542	0.976168	0.985963	1.0124	0.981489	1.01139	0.999938	1.01692	0.973681	1.02041	0.970736	0.981525	0.981135	1.00637	1.01872
210	FAM111A-DT	AP001258.4	ASO_G0245571_05	Targeted lncRNA	r3b2p3	0.900879	0.967137	0.988893	0.909847	0.972616	1.00492	0.99285	1.00236	1.02461	1.00492	1.04716	1.04179	0.977334	0.960921	0.978309	0.960402	1.0085	0.964438	1.00194	0.982438	1.02537	0.955294	1.02245	0.949406	0.988494	0.936581	1.00041	1.01747
211	FAM111A-DT	AP001258.4	ASO_G0245571_06	Targeted lncRNA	r3b2p3	0.863752	0.945567	1.01066	1.00812	0.994775	1.04187	1.00121	1.01063	1.02195	0.94667	1.07211	1.01097	1.0141	1.04333	1.01564	1.03754	1.01574	0.995964	1.03508	1.00059	0.985147	0.979747	0.988951	0.985118	0.978182	1.0086	1.0314	1.01127
212	FAM111A-DT	AP001258.4	ASO_G0245571_08	Targeted lncRNA	r3b2p3	0.837243	0.900246	0.829629	0.925413	0.939636	0.961887	0.975111	0.987783	1.02731	1.01216	1.1175	1.09681	0.88546	0.944596	0.885486	0.947025	0.949171	0.970712	0.971207	0.997037	0.925642	0.974264	0.944291	0.983002	0.865328	0.937437	1.02921	1.02818
213	FAM111A-DT	AP001258.4	ASO_G0245571_AD_01	Targeted lncRNA	r11b1ADp4	0.965186	0.975459	1.05332	0.995292	0.973658	0.941657	0.989617	0.985823	1.00425	1.01423	0.988108	1.03392	1.0057	0.964478	1.01189	0.967587	1.02834	1.01976	1.02365	1.01629	1.05472	1.01306	1.05486	1.01435	1.03112	0.982341	0.991437	1.01198
214	FAM111A-DT	AP001258.4	ASO_G0245571_AD_02	Targeted lncRNA	r11b1ADp4	1.00102	0.931754	0.919296	1.13117	0.989011	1.02451	0.997416	1.00039	0.960135	0.980429	0.9975	0.964527	0.959387	1.07941	0.964624	1.07838	0.974562	1.04162	0.97872	1.02078	0.961913	1.08564	0.958511	1.06459	0.945371	1.09617	1.0052	0.972674
215	FAM111A-DT	AP001258.4	ASO_G0245571_AD_03	Targeted lncRNA	r11b1ADp4	0.939115	0.859195	0.967795	1.01139	1.01955	0.976914	1.00184	0.983666	0.977954	1.01069	0.983957	1.0051	1.00112	0.983779	0.992885	0.981955	0.976438	0.989936	0.979131	0.993695	0.995785	1.02483	0.984117	1.02109	0.997896	1.005	0.989965	0.990514
216	FAM111A-DT	AP001258.4	ASO_G0245571_AD_07	Targeted lncRNA	r11b1ADp4	0.964684	0.836358	1.03538	1.08163	0.951767	0.994562	0.988858	0.983281	1.01361	1.0156	1.01788	1.01876	0.990071	1.02707	0.994185	1.01924	1.02416	1.01564	1.0073	1.0152	1.03316	1.05198	1.02913	1.05381	1.01977	1.04348	1.0044	0.999431
217	FAM111A-DT	AP001258.4	ASO_G0245571_AD_09	Targeted lncRNA	r11b1ADp4	0.820703	0.846027	0.962628	1.06313	1.01246	0.992736	1.00346	0.996581	0.991993	1.00466	0.991959	1.01605	0.992157	1.02704	0.989444	1.01992	0.980528	1.01065	0.97916	1.00855	0.986311	1.02854	0.975259	1.01592	0.99105	1.03072	0.986687	1.00256
218	ARHGAP5-AS1	ARHGAP5-AS1	ASO_G0258655_01	Targeted lncRNA	r8b7p5	0.989116	0.957285	0.943152	0.953654	0.878288	0.943133	0.972148	0.981378	1.07926	1.04548	1.10446	1.04554	0.899468	0.942073	0.903369	0.936787	1.03301	0.995178	1.02636	0.988962	1.00205	1.02041	1.01244	1.02529	0.921569	0.962149	1.02167	0.986758
219	ARHGAP5-AS1	ARHGAP5-AS1	ASO_G0258655_02	Targeted lncRNA	r8b7p5	0.861131	0.872094	0.966658	0.902611	0.989613	0.99948	0.993593	0.991248	0.996436	1.02584	1.04062	1.10499	0.983566	0.953486	0.972213	0.941839	0.995822	0.961737	1.00108	0.977153	1.00867	0.947339	1.00386	0.946691	0.969226	0.920917	0.997742	1.01747
220	ARHGAP5-AS1	ARHGAP5-AS1	ASO_G0258655_05	Targeted lncRNA	r8b7p5	0.792972	0.828793	0.98213	0.961148	0.948558	0.953368	0.98639	0.993556	1.03396	1.01749	1.08064	1.08784	0.961784	0.9664	0.951327	0.966763	1.00704	1.00565	1.01306	1.01445	1.01915	0.983059	1.02547	0.990408	0.97327	0.949061	1.00821	1.01974
221	ARHGAP5-AS1	ARHGAP5-AS1	ASO_G0258655_07	Targeted lncRNA	r8b7p5	0.830656	0.843419	1.02083	1.03786	0.957764	0.984549	0.985561	0.998884	1.01062	1.00311	1.03984	1.02962	0.965744	1.01512	0.96468	1.01343	1.00318	1.03804	1.00516	1.03425	1.04275	1.01057	1.05556	1.02071	0.993945	1.01201	1.00255	1.0096
222	ARHGAP5-AS1	ARHGAP5-AS1	ASO_G0258655_08	Targeted lncRNA	r8b7p5	0.727777	0.716732	0.975612	0.986888	0.992355	1.05113	0.990777	0.995839	1.01064	1.01243	1.0532	1.00995	0.98024	1.02205	0.965779	1.00036	0.987953	0.98095	0.998614	0.98001	1.0024	0.999683	0.998582	0.99859	0.967087	0.992858	0.99752	0.979734
223	BAZ2B	BAZ2B	ASO_G0226266_01	Positive Control	r4b4p3	1.17268	1.10885	0.942761	1.08493	0.98109	1.00561	0.989556	0.996257	1.0087	0.976145	0.979534	0.969587	0.948291	1.0332	0.939579	1.03384	0.96852	1.03939	0.964089	1.02309	0.994702	1.06342	0.995999	1.05755	0.963148	1.04733	0.979021	0.993127
224	BAZ2B	BAZ2B	ASO_G0226266_02	Positive Control	r4b4p3	0.79885	0.902697	1.03886	0.938463	1.12859	1.03493	1.0228	1.01056	0.940013	1.01114	0.946177	1.06447	1.10284	0.995984	1.08974	0.985306	0.996121	0.96981	0.991764	0.999682	0.984544	0.936154	0.974561	0.937363	1.04136	0.937183	0.990789	1.02949
225	BAZ2B	BAZ2B	ASO_G0226266_05	Positive Control	r4b4p3	0.86004	0.87478	0.948155	1.01122	0.99407	1.09353	0.984967	1.01677	1.03608	0.964881	1.11946	0.989766	0.965763	1.06358	0.951847	1.05466	0.976621	0.968222	0.993259	0.992062	0.95485	0.951538	0.954631	0.961469	0.927055	1.01309	1.02472	1.01097
226	BAZ2B	BAZ2B	ASO_G0226266_07	Positive Control	r4b4p3	0.851938	0.851318	0.888553	0.943584	0.966607	1.02855	0.98453	0.992859	1.0501	1.01151	1.16845	1.03786	0.923939	0.972868	0.914566	0.964957	0.974679	0.9831	1.00741	0.99147	0.930051	0.978814	0.945623	0.987443	0.879278	0.954171	1.04273	1.00733
227	BAZ2B	BAZ2B	ASO_G0226266_10	Positive Control	r4b4p3	0.8832	0.844181	1.05339	0.927729	0.988235	1.0342	1.00704	1.0027	1.00015	0.987857	1.05541	1.0411	1.01521	0.987911	1.01368	0.976025	1.01842	0.952676	1.02778	0.969257	1.00493	0.942085	1.00264	0.945376	0.992729	0.950692	1.01649	1.00978
228	BOLA3-AS1	BOLA3-AS1	ASO_G0225439_01	Targeted lncRNA	r4b4p2	1.12902	0.982494	1.01025	1.01853	1.02008	0.979942	1.00203	0.988366	0.978139	1.03826	0.961336	1.03006	1.01719	1.00061	1.01418	1.00501	0.991132	1.00986	0.98846	1.021	1.02182	1.00012	1.01444	0.998963	1.02067	0.99859	0.970558	1.00788
229	BOLA3-AS1	BOLA3-AS1	ASO_G0225439_03	Targeted lncRNA	r4b4p2	1.15632	1.00822	1.18955	1.14651	0.990078	0.998434	0.993142	0.997739	0.981161	0.986504	0.963732	0.956497	1.07641	1.05922	1.08951	1.07397	1.07921	1.0629	1.04663	1.03107	1.09884	1.06231	1.09673	1.06081	1.1225	1.09402	0.991109	0.994971
230	BOLA3-AS1	BOLA3-AS1	ASO_G0225439_06	Targeted lncRNA	r4b4p2	0.871678	0.967749	1.01552	0.986481	1.01292	0.967061	0.997585	0.998087	1.00208	1.0579	1.00448	1.06895	1.01381	0.991937	1.01387	0.996336	1.02661	1.03155	1.0027	1.04385	1.01851	0.96999	1.02227	0.982742	1.00896	0.961916	0.99275	1.03377
231	BOLA3-AS1	BOLA3-AS1	ASO_G0225439_08	Targeted lncRNA	r4b4p2	0.90851	1.04622	0.992014	0.987555	0.990043	1.01301	0.992794	1.00312	1.04567	1.0037	1.03477	1.03623	0.991706	1.00689	0.978896	1.00795	0.969421	1.00009	0.971157	1.01416	1.0209	0.966272	1.02104	0.974038	1.00796	0.984787	0.987226	1.02421
232	BOLA3-AS1	BOLA3-AS1	ASO_G0225439_09	Targeted lncRNA	r4b4p2	1.06682	1.01141	0.969539	1.00777	0.969301	0.975849	0.988707	0.988517	1.03063	0.998775	1.03532	0.969045	0.958367	0.991109	0.95325	0.996847	1.0121	1.00937	1.01272	0.999376	1.01167	1.04339	1.01494	1.04465	0.966704	1.02877	0.99513	0.984063
233	BOLA3-AS1	BOLA3-AS1	ASO_G0225439_AD_01	Targeted lncRNA	r12b2ADp2	0.91278	0.920348	0.926126	1.00834	0.982647	0.973609	1.00136	0.994403	1.01708	1.03234	1.02846	1.00586	0.963246	0.980344	0.958344	0.981845	0.973063	1.01319	0.982028	1.01326	0.967052	1.01083	0.971499	1.00148	0.956688	0.98848	1.01011	0.998918
234	BOLA3-AS1	BOLA3-AS1	ASO_G0225439_AD_02	Targeted lncRNA	r12b2ADp2	0.7782	0.785929	1.06517	0.962746	1.01083	0.995727	1.00107	0.993168	0.990526	0.99658	0.999504	1.01471	1.03412	0.973125	1.03046	0.96875	1.01922	0.988396	1.01438	0.997075	1.0377	0.997814	1.03038	0.995556	1.03505	0.974207	0.991288	0.997064
235	BOLA3-AS1	BOLA3-AS1	ASO_G0225439_AD_03	Targeted lncRNA	r12b2ADp2	0.937049	0.88927	1.01155	0.967503	1.07689	1.00944	1.00577	1.00337	0.995367	1.00648	0.986653	1.02087	1.05384	0.99939	1.04161	0.992379	0.981225	0.971457	0.982777	0.986488	1.00015	0.969957	0.995584	0.969843	1.02868	0.981058	0.979764	1.00646
236	BOLA3-AS1	BOLA3-AS1	ASO_G0225439_AD_04	Targeted lncRNA	r12b2ADp2	0.922683	0.89221	0.989102	1.05628	1.05797	1.05623	1.01672	1.00313	0.954196	0.969352	0.945867	0.981167	1.03989	1.06093	1.03133	1.03976	0.971987	0.976226	0.975532	0.985781	0.978323	1.03495	0.969518	1.01264	1.02217	1.04741	0.981602	0.977924
237	BOLA3-AS1	BOLA3-AS1	ASO_G0225439_AD_08	Targeted lncRNA	r12b2ADp2	0.883219	0.896917	0.888952	0.882458	0.915187	0.9341	0.988167	0.98514	1.04699	1.06197	1.10348	1.08755	0.897574	0.907344	0.894116	0.904025	0.977438	0.98819	0.99418	0.995008	0.96871	0.974907	0.978039	0.971942	0.903839	0.902429	1.02611	1.01289
238	BX322557.10	BX322557.10	ASO_G0215447_01	Targeted lncRNA	r2b1p3	0.360226	0.388538	1.04947	1.08148	0.962059	0.91207	0.98514	0.975324	1.00128	1.04287	0.989141	1.01806	0.984129	0.953584	0.983331	0.951062	1.03619	1.04932	1.0226	1.04298	1.05597	1.09612	1.05131	1.08776	1.01846	1.01049	0.985606	0.990919
239	BX322557.10	BX322557.10	ASO_G0215447_02	Targeted lncRNA	r2b1p3	1.04534	1.01618	0.992264	0.961985	1.03405	1.01441	1.006	1.00397	1.00992	1.01754	1.01322	1.03806	1.01786	0.986336	1.01595	0.984675	0.992924	0.98559	0.992215	1.00176	0.98411	0.974482	0.979581	0.975468	0.997576	0.964817	1.00241	1.01296
240	BX322557.10	BX322557.10	ASO_G0215447_03	Targeted lncRNA	r2b1p3	0.806618	0.768379	0.871932	0.848796	0.921644	0.905771	0.978613	0.976716	1.06319	1.07133	1.11514	1.13882	0.894344	0.873347	0.894824	0.874447	0.984003	0.980121	0.989904	1.00187	0.952212	0.923683	0.957556	0.935937	0.893039	0.863047	1.02276	1.03631
241	BX322557.10	BX322557.10	ASO_G0215447_05	Targeted lncRNA	r2b1p3	0.968577	0.935696	0.968042	0.972822	1.00699	0.988881	1.00021	0.994283	0.990387	1.02238	0.959116	1.03126	0.98851	0.972141	0.984954	0.970826	0.972961	1.00087	0.968549	0.999184	1.01408	1.00288	1.01461	1.00475	1.00984	0.975832	0.980252	1.00674
242	BX322557.10	BX322557.10	ASO_G0215447_08	Targeted lncRNA	r2b1p3	0.948921	0.943499	0.987994	0.962294	1.00475	1.02507	0.99839	1.01	0.981717	0.980621	0.979577	0.97402	0.988508	0.986942	0.984617	0.988605	0.984642	0.953786	0.982741	0.964282	1.0093	0.97036	1.01439	0.974907	1.00406	0.990292	0.988597	0.988163
243	C11orf95	C11orf95	ASO_G0188070_01	Targeted lncRNA	r1b0p5	0.757767	1.06548	1.00394	1.05084	1.01456	0.986564	1.0072	0.995963	0.917748	1.00714	0.973375	0.968004	1.01501	1.00731	1.01395	1.01193	0.994188	1.02377	0.99243	1.01623	0.991812	1.05416	0.982379	1.0517	1.01608	1.03749	0.995933	0.984103
244	C11orf95	C11orf95	ASO_G0188070_02	Targeted lncRNA	r1b0p5	0.709138	0.827709	1.11813	0.941713	0.973542	0.969998	0.986278	0.984272	1.03164	1.01062	1.0066	1.06056	1.02896	0.959437	1.03208	0.956646	1.07995	0.999252	1.05276	0.997572	1.09107	0.97956	1.0738	0.978535	1.04207	0.945958	0.985808	1.00763
245	C11orf95	C11orf95	ASO_G0188070_03	Targeted lncRNA	r1b0p5	0.810717	0.995808	0.90953	0.921712	1.00115	0.973788	1.00101	0.992946	1.08502	1.00984	1.11152	1.0819	0.968463	0.952655	0.957684	0.947331	0.953656	0.969529	0.977182	0.98661	0.918403	0.971932	0.929309	0.985166	0.932236	0.941655	1.02875	1.01929
246	C11orf95	C11orf95	ASO_G0188070_04	Targeted lncRNA	r1b0p5	0.936051	0.89917	1.02868	1.04122	1.03921	1.04723	1.01447	1.01739	0.95223	0.92944	0.997219	0.994222	1.03947	1.05522	1.03646	1.05072	1.00318	1.01259	1.00929	1.01009	0.972019	0.978788	0.965777	0.970142	1.00591	1.02077	1.01011	1.0098
247	C11orf95	C11orf95	ASO_G0188070_05	Targeted lncRNA	r1b0p5	0.95944	0.941345	1.05907	1.04171	0.920427	0.971462	0.984405	1.00413	1.08209	1.01995	1.04465	1.03016	0.973035	1.0133	0.977191	1.00802	1.07475	1.02084	1.05514	1.02727	1.07187	1.01451	1.06962	1.00871	0.993087	1.0072	0.99645	1.00738
248	C11orf95	C11orf95	ASO_G0188070_AD_02	Targeted lncRNA	r10b0ADp5	0.488278	0.627233	0.792891	0.839474	0.912641	0.903952	0.964297	0.969887	1.10671	1.11609	1.17991	1.21121	0.859052	0.874003	0.848618	0.864258	0.930617	0.970526	0.944439	0.985177	0.919159	0.923831	0.924793	0.932301	0.840426	0.846591	1.01806	1.03773
249	C11orf95	C11orf95	ASO_G0188070_AD_05	Targeted lncRNA	r10b0ADp5	0.999879	1.02286	1.01362	1.13913	1.1598	1.08127	1.0231	1.0215	0.945758	0.951698	0.911201	0.915673	1.10023	1.1103	1.09458	1.12108	0.961066	1.02542	0.969587	1.02523	0.939761	1.01638	0.936234	1.00965	1.05569	1.09577	0.997094	0.987329
250	C11orf95	C11orf95	ASO_G0188070_AD_06	Targeted lncRNA	r10b0ADp5	0.90433	0.926785	0.954063	0.948039	0.956354	0.928102	0.983712	0.986227	1.04922	1.04157	1.08404	1.0491	0.95508	0.938045	0.952407	0.936532	1.00346	1.01142	1.01923	1.00785	0.989891	1.01917	0.994478	1.02753	0.938407	0.952635	1.01716	0.99673
251	C11orf95	C11orf95	ASO_G0188070_AD_07	Targeted lncRNA	r10b0ADp5	0.644208	0.704099	0.966641	0.900014	0.942726	0.988429	0.989389	0.996443	1.0495	1.00448	1.07695	1.0647	0.962659	0.953442	0.955764	0.939455	1.00476	0.951253	1.01271	0.9685	1.0145	0.970873	1.0169	0.966999	0.957074	0.92691	1.00595	1.00132
252	C11orf95	C11orf95	ASO_G0188070_AD_08	Targeted lncRNA	r10b0ADp5	0.971488	0.969486	0.909658	0.984814	0.930605	0.949226	0.992564	0.988814	1.02835	1.04804	1.06072	1.03085	0.922825	0.969994	0.920504	0.971962	0.98585	1.01237	0.98362	1.00372	0.995677	1.02202	0.994962	1.01824	0.931756	0.982761	0.995324	0.995796
253	PCOTH	C1QTNF9B-AS1	ASO_G0205861_03	Targeted lncRNA	r5b3p5	0.987225	1.04956	0.966262	0.949343	0.942924	0.94585	0.969249	0.978009	1.01626	1.04603	0.987319	1.00999	0.925773	0.941454	0.933168	0.941465	1.01041	0.998115	0.992636	0.983989	1.05823	1.02839	1.0603	1.03071	0.975468	0.973075	0.970253	0.975056
254	PCOTH	C1QTNF9B-AS1	ASO_G0205861_04	Targeted lncRNA	r5b3p5	1.11047	0.988684	0.879872	0.915194	0.95945	0.977867	0.981506	0.989895	1.00993	0.998389	1.03449	1.03407	0.917086	0.944308	0.915249	0.944434	0.978347	0.984295	0.97775	0.97299	0.983406	0.98936	0.974121	0.989318	0.908221	0.943486	0.982174	0.992194
255	PCOTH	C1QTNF9B-AS1	ASO_G0205861_05	Targeted lncRNA	r5b3p5	0.717526	0.760395	0.834729	0.876244	0.917254	0.872881	0.978546	0.966939	1.05099	1.07182	1.10812	1.16035	0.863285	0.861418	0.848614	0.855032	0.963041	0.985045	0.962198	0.996592	0.971261	1.00441	0.965808	1.01314	0.871533	0.876463	0.990902	1.01679
256	PCOTH	C1QTNF9B-AS1	ASO_G0205861_07	Targeted lncRNA	r5b3p5	0.78302	0.853413	0.799223	0.909965	0.95753	0.862503	0.967806	0.971955	1.03656	1.08654	1.06893	1.151	0.876731	0.886165	0.856394	0.884823	0.909206	1.03162	0.906878	1.03294	0.965839	1.01776	0.952312	1.0293	0.88428	0.899748	0.965719	1.02227
257	PCOTH	C1QTNF9B-AS1	ASO_G0205861_10	Targeted lncRNA	r5b3p5	1.04003	0.943321	0.906056	0.911328	0.950114	0.946837	0.97945	0.983911	1.00853	1.02097	1.01551	1.06038	0.921251	0.928497	0.926797	0.924343	0.984391	0.994438	0.978549	0.993956	1.01753	0.993496	1.02011	1.00537	0.942834	0.933715	0.969065	1.0041
258	CATG00000011013.1	CATG00000011013.1	ASO_C0018982_01	Targeted lncRNA	r5b3p2	1.05774	1.06451	0.956367	1.0185	1.01601	0.982837	1.00325	0.992355	1.05095	1.02963	1.00605	1.01277	0.989063	0.998934	0.988476	0.998185	0.973717	1.00891	0.977434	1.00621	0.956758	1.01937	0.95888	1.03001	0.983384	1.01996	1.00209	1.00344
259	CATG00000011013.1	CATG00000011013.1	ASO_C0018982_02	Targeted lncRNA	r5b3p2	0.993462	0.943696	0.936785	0.982424	0.908133	0.928568	0.976263	0.986213	1.03256	1.03984	1.0856	1.03366	0.912484	0.948356	0.908825	0.957651	1.01034	1.02658	1.01705	1.01311	1.02975	1.0628	1.04175	1.06875	0.93344	0.991698	1.0116	0.997582
260	CATG00000011013.1	CATG00000011013.1	ASO_C0018982_04	Targeted lncRNA	r5b3p2	0.914647	0.992662	0.930582	0.930868	0.878019	0.878686	0.969334	0.968253	1.06533	1.06777	1.07619	1.08346	0.884099	0.889354	0.892646	0.899763	1.04224	1.0289	1.02775	1.01596	1.02181	1.03852	1.03179	1.04143	0.917336	0.929736	1.0068	1.0036
261	CATG00000011013.1	CATG00000011013.1	ASO_C0018982_06	Targeted lncRNA	r5b3p2	1.0871	1.00175	0.991941	0.940115	1.05807	0.961543	1.01597	0.99875	0.986621	1.01057	1.00631	1.04203	1.03284	0.958748	1.02548	0.959605	0.979148	0.989364	0.989636	0.98713	0.97532	0.979287	0.969544	0.979796	1.00436	0.955921	1.00614	1.0115
262	CATG00000011013.1	CATG00000011013.1	ASO_C0018982_09	Targeted lncRNA	r5b3p2	0.408062	0.10397	0.68523	0.634685	0.857376	0.840784	0.949273	0.925737	1.15321	1.17539	1.28412	1.33311	0.760039	0.718161	0.740254	0.700624	0.896947	0.855849	0.930635	0.893444	0.866172	0.823926	0.874476	0.847244	0.745736	0.710006	1.03921	1.04331
263	CATG00000016989.1	CATG00000016989.1	ASO_C0020443_01	Targeted lncRNA	r5b3p6	1.01845	0.927586	0.970181	1.08543	0.941456	0.873237	0.98026	0.963534	1.02034	1.0546	1.02722	1.02487	0.944529	0.946775	0.94586	0.95303	1.00523	1.08075	0.995994	1.06064	1.03133	1.11674	1.02619	1.11968	0.967892	1.01017	0.991732	0.995054
264	CATG00000016989.1	CATG00000016989.1	ASO_C0020443_02	Targeted lncRNA	r5b3p6	1.03689	0.941968	0.941658	1.02057	0.958352	1.04568	0.987433	1.00472	1.05197	0.971774	1.06183	1.00234	0.953565	1.04599	0.947227	1.03808	0.997047	1.00792	1.00781	0.999691	0.997091	0.979619	1.0075	0.98243	0.951456	1.01749	1.01579	1.01337
265	CATG00000016989.1	CATG00000016989.1	ASO_C0020443_03	Targeted lncRNA	r5b3p6	0.915579	0.890314	0.987466	1.05313	0.964745	0.988953	0.988049	0.994981	1.05504	1.03242	1.07705	1.00446	0.971374	1.02236	0.962662	1.01778	0.995871	1.01035	1.0077	1.00079	0.991345	1.04391	1.00029	1.04478	0.967197	1.0462	1.02676	0.997431
266	CATG00000016989.1	CATG00000016989.1	ASO_C0020443_06	Targeted lncRNA	r5b3p6	1.01237	0.86679	0.924149	0.959752	0.782996	0.821458	0.938779	0.939389	1.13012	1.11139	1.20366	1.13496	0.832708	0.872057	0.845121	0.879546	1.07323	1.07136	1.0591	1.0557	1.04922	1.07134	1.07811	1.09173	0.896796	0.933015	1.03885	1.0169
267	CATG00000016989.1	CATG00000016989.1	ASO_C0020443_10	Targeted lncRNA	r5b3p6	1.04678	0.991544	1.01777	1.03651	0.990544	1.01458	0.99971	1.00824	0.9958	0.99416	1.00377	0.990362	1.00203	1.02852	0.999831	1.02639	1.00933	1.00105	1.00822	0.998681	1.01974	0.995562	1.01703	0.996161	0.999679	1.01713	0.999629	1.00501
268	CATG00000017883.1	CATG00000017883.1	ASO_C0020672_01	Positive Control	r3b2p5	0.905793	0.927299	0.914158	0.919901	0.992342	0.954401	0.989087	0.985297	1.02142	0.999658	1.03838	1.04091	0.939651	0.935386	0.931416	0.935287	0.94898	0.969894	0.954701	0.988455	0.972659	1.01025	0.968277	1.00377	0.93417	0.943702	0.994719	0.997644
269	CATG00000017883.1	CATG00000017883.1	ASO_C0020672_02	Positive Control	r3b2p5	0.855789	0.856353	0.865383	0.952389	0.911984	0.941476	0.981253	0.992255	1.07238	1.0391	1.11993	1.07843	0.890145	0.957468	0.891435	0.961585	0.981275	1.01846	1.00361	1.02722	0.981289	0.988388	0.992637	0.993608	0.887833	0.940315	1.01474	1.02482
270	CATG00000017883.1	CATG00000017883.1	ASO_C0020672_03	Positive Control	r3b2p5	0.907993	0.954676	0.926423	0.89222	0.944151	0.954449	0.994971	0.985834	1.00599	1.03994	1.0991	1.0771	0.937726	0.916295	0.934532	0.916726	0.987389	0.978325	1.00407	0.993075	0.967285	0.990778	0.972286	0.990733	0.921177	0.920246	1.02605	1.00462
271	CATG00000017883.1	CATG00000017883.1	ASO_C0020672_06	Positive Control	r3b2p5	0.974056	0.974883	1.01282	1.01937	0.989463	0.981817	0.98519	1.00231	0.973264	0.989868	0.979935	1.01996	1.00194	0.991887	1.005	0.996669	1.0202	1.02571	1.01146	1.02974	1.06421	1.01668	1.05343	1.01688	1.02017	0.978067	0.982547	1.00632
272	CATG00000017883.1	CATG00000017883.1	ASO_C0020672_07	Positive Control	r3b2p5	0.744378	0.795516	0.758206	0.780625	0.862713	0.884528	0.978015	0.977142	1.12259	1.09636	1.26455	1.21894	0.807248	0.837835	0.800634	0.829553	0.951068	0.952832	0.991138	0.982792	0.894331	0.927143	0.909626	0.933422	0.779369	0.808659	1.06818	1.03841
273	CATG00000020700.1	CATG00000020700.1	ASO_C0020984_01	Targeted lncRNA	r5b3p2	0.996318	0.971113	0.991188	0.882562	1.04596	0.938224	1.00462	0.983937	0.950902	1.03783	0.944401	1.05639	1.02293	0.899283	1.02792	0.898019	0.967146	0.972744	0.966133	0.98319	0.998617	0.969847	0.99601	0.980038	1.03552	0.91395	0.98172	1.00959
274	CATG00000020700.1	CATG00000020700.1	ASO_C0020984_02	Targeted lncRNA	r5b3p2	0.962104	1.02915	0.92956	1.07986	0.980239	0.973144	1.0016	0.998183	0.997792	1.02523	1.01767	1.01856	0.95755	1.01793	0.955053	1.02153	0.977602	1.03706	0.983404	1.03114	0.979925	1.0454	0.982269	1.04608	0.957371	1.03397	1.00308	1.00848
275	CATG00000020700.1	CATG00000020700.1	ASO_C0020984_05	Targeted lncRNA	r5b3p2	0.892183	0.989265	0.974231	0.954424	1.02342	0.996095	1.0137	1.00217	1.01399	1.02246	1.03132	1.01994	1.01034	0.982562	1.00745	0.981922	0.973166	0.987789	0.997148	1.00187	0.951246	0.976649	0.948771	0.979613	0.977589	0.963814	1.023	1.00838
276	CATG00000020700.1	CATG00000020700.1	ASO_C0020984_08	Targeted lncRNA	r5b3p2	1.05517	1.06661	0.924041	0.93954	0.965622	0.949384	0.994555	0.994438	1.02706	1.05343	1.0336	1.07859	0.949271	0.952239	0.949618	0.950929	0.97909	1.00261	0.983116	1.00817	0.980011	0.973725	0.987602	0.982334	0.949806	0.94189	1.0079	1.02205
277	CATG00000020700.1	CATG00000020700.1	ASO_C0020984_09	Targeted lncRNA	r5b3p2	-0.080495	0.103826	0.628908	0.777431	0.738066	0.824917	0.925721	0.952698	1.25396	1.18243	1.44609	1.3064	0.667899	0.7935	0.658091	0.779012	0.920431	0.965102	0.980787	1.00201	0.821998	0.903877	0.861911	0.932778	0.650895	0.76916	1.09908	1.07318
278	CATG00000034824.1	CATG00000034824.1	ASO_C0025760_01	Targeted lncRNA	r5b3p2	1.06077	1.12777	0.947422	1.09106	0.96049	0.99462	1.00277	1.0043	0.99821	0.977452	1.01519	0.93062	0.955072	1.03847	0.954573	1.0439	0.997377	1.04271	1.00263	1.01914	0.977735	1.06279	0.981833	1.05144	0.952088	1.0714	1.01262	0.975984
279	CATG00000034824.1	CATG00000034824.1	ASO_C0025760_02	Targeted lncRNA	r5b3p2	1.01293	1.09337	0.992503	1.04363	1.09185	1.09337	1.01713	1.01494	0.980631	0.948429	0.962054	0.930774	1.05787	1.07323	1.05495	1.07377	0.956689	0.992551	0.970593	0.990715	0.949542	0.977099	0.950459	0.974395	1.029	1.05275	1.00421	0.993405
280	CATG00000034824.1	CATG00000034824.1	ASO_C0025760_03	Targeted lncRNA	r5b3p2	0.899862	0.916499	0.936637	1.02653	0.892977	0.878335	0.967521	0.967291	1.08173	1.04106	1.06142	0.993067	0.896604	0.922048	0.899598	0.931711	1.0061	1.03988	1.00676	1.01626	1.02605	1.1031	1.03876	1.10465	0.935888	1.01947	1.00813	0.984576
281	CATG00000034824.1	CATG00000034824.1	ASO_C0025760_07	Targeted lncRNA	r5b3p2	1.02995	1.16033	0.931256	0.986459	0.989975	1.0371	0.996804	1.00536	1.01371	0.980797	1.00333	0.943682	0.947258	1.00775	0.944878	1.00894	0.973849	0.98632	0.982586	0.981275	0.989264	0.98774	0.99188	0.989835	0.952606	1.00812	0.995222	0.994507
282	CATG00000034824.1	CATG00000034824.1	ASO_C0025760_10	Targeted lncRNA	r5b3p2	0.926639	1.00967	1.02112	1.12791	0.939933	1.0349	0.994868	1.00627	1.04962	1.06451	1.07189	0.999719	0.973538	1.09279	0.97846	1.09451	1.02635	1.04101	1.03815	1.03392	1.01557	1.02425	1.0269	1.02667	0.976866	1.08594	1.0274	1.0109
283	CATG00000035089.1	CATG00000035089.1	ASO_C0025854_01	Targeted lncRNA	r15bALLp1	0.909814	0.930539	0.939278	0.989491	0.951963	0.980151	0.994296	0.996698	1.02467	1.01015	1.03385	1.0052	0.942609	0.988002	0.946031	0.992639	0.982954	1.01551	0.997243	1.01239	0.982049	1.00459	0.990652	1.00116	0.952757	0.987248	1.01519	0.999045
284	CATG00000035089.1	CATG00000035089.1	ASO_C0025854_02	Targeted lncRNA	r15bALLp1	1.12046	1.05408	0.988349	0.996441	0.981097	0.990856	0.990647	0.989014	1.00983	0.993257	1.01689	0.997246	0.979781	0.978564	0.972213	0.984573	0.997144	0.994527	1.00069	0.986511	1.00523	1.02513	1.00664	1.02229	0.980667	1.01121	1.00308	0.988809
285	CATG00000035089.1	CATG00000035089.1	ASO_C0025854_04	Targeted lncRNA	r15bALLp1	1.05307	1.06652	0.987262	0.947906	1.00166	0.99925	1.00186	0.998696	1.0263	0.951172	1.01295	0.988278	0.992219	0.968545	0.990325	0.970651	1.00246	0.98078	1.01256	0.970633	0.994326	0.99129	0.99456	0.987148	0.979691	0.979307	1.00015	0.989461
286	CATG00000035089.1	CATG00000035089.1	ASO_C0025854_05	Targeted lncRNA	r15bALLp1	1.01738	1.2818	1.08109	1.00147	0.99578	0.941387	1.01583	0.986904	1.00968	0.990465	0.994403	0.991398	1.0441	0.958031	1.05126	0.969521	1.04968	1.02757	1.03978	1.00779	0.99988	1.02994	0.99758	1.02637	1.02795	0.990815	1.01349	0.99391
287	CATG00000035089.1	CATG00000035089.1	ASO_C0025854_09	Targeted lncRNA	r15bALLp1	0.97066	0.981242	0.999377	0.962627	0.971362	0.956417	0.988961	0.995751	1.04134	1.01409	1.02099	1.00916	0.978779	0.953405	0.980676	0.958484	1.01035	1.00142	1.00004	0.996446	1.02168	0.989962	1.02501	0.991644	0.994595	0.968829	0.998792	0.998971
288	CATG00000073509.1	CATG00000073509.1	ASO_C0007786_01	Targeted lncRNA	r5b3p1	0.976434	1.07642	0.968149	1.03277	0.994294	1.0601	1.00415	1.00055	1.00927	1.011	1.01973	0.986447	0.982272	1.04296	0.987911	1.0344	0.985919	0.985932	0.985266	0.991297	0.97469	0.995413	0.979981	1.00042	0.977188	1.03298	1.01338	0.990684
289	CATG00000073509.1	CATG00000073509.1	ASO_C0007786_02	Targeted lncRNA	r5b3p1	0.932421	0.993096	1.00694	0.985924	0.935004	0.927615	0.979392	0.971588	1.05301	1.06913	1.04238	1.05606	0.961027	0.950787	0.968473	0.953082	1.03165	1.03117	1.02705	1.02172	1.04513	1.03438	1.05472	1.04223	0.99349	0.977966	1.00521	1.00866
290	CATG00000073509.1	CATG00000073509.1	ASO_C0007786_03	Targeted lncRNA	r5b3p1	0.955406	0.818499	0.932439	1.01308	0.99557	0.957855	0.993913	0.989404	1.01874	1.03653	1.03824	1.04693	0.965894	0.971905	0.962494	0.971271	0.96795	1.01955	0.974002	1.01454	0.968258	1.03328	0.974555	1.04483	0.952532	0.987054	1.00569	0.999302
291	CATG00000073509.1	CATG00000073509.1	ASO_C0007786_04	Targeted lncRNA	r5b3p1	0.93844	0.903193	0.915302	0.975193	0.97676	0.964374	0.989843	0.993756	1.05743	1.04643	1.08965	1.07077	0.955948	0.970133	0.943918	0.964803	0.984005	1.00468	1.00495	1.01206	0.964508	0.995101	0.967821	0.995664	0.920264	0.954548	1.02314	1.0142
292	CATG00000073509.1	CATG00000073509.1	ASO_C0007786_08	Targeted lncRNA	r5b3p1	1.01817	0.992186	0.982266	0.984593	1.00064	0.951402	1.00273	0.982017	1.01714	1.0452	1.01721	1.06927	0.989653	0.960365	0.985997	0.958748	0.996321	1.01154	0.998884	1.02074	0.982943	1.01792	0.995033	1.03139	0.987168	0.96958	1.01566	1.0211
293	CATG00000076290.1	CATG00000076290.1	ASO_C0008822_02	Targeted lncRNA	r5b3p1	0.960477	1.00405	1.03014	1.02741	1.01558	0.993029	1.00428	0.994227	0.999251	1.04819	1.00806	1.00791	1.02263	1.0054	1.01906	1.00704	1.00106	1.02605	0.99233	1.02156	0.999689	1.01244	0.997456	1.01898	1.01551	1.00139	1.00036	1.00123
294	CATG00000076290.1	CATG00000076290.1	ASO_C0008822_03	Targeted lncRNA	r5b3p1	0.759748	0.8089	0.967395	0.887211	0.917079	0.894862	0.971028	0.968571	1.04352	1.08906	1.09311	1.14862	0.927175	0.878694	0.931693	0.877095	1.04473	0.989502	1.0308	0.997293	1.03416	0.973685	1.03766	0.994691	0.943718	0.886893	1.00911	1.02131
295	CATG00000076290.1	CATG00000076290.1	ASO_C0008822_04	Targeted lncRNA	r5b3p1	0.88381	0.873952	1.03507	0.936975	1.05948	0.956178	1.01198	0.979809	0.980056	1.05539	1.01472	1.08362	1.05958	0.949821	1.05133	0.944713	1.00146	0.987621	1.01914	0.997093	0.968687	0.994174	0.973038	1.00214	1.01173	0.941092	1.02135	1.00727
296	CATG00000076290.1	CATG00000076290.1	ASO_C0008822_07	Targeted lncRNA	r5b3p1	0.904412	0.992119	1.00824	0.998187	0.954613	0.93061	0.989453	0.98523	1.05862	1.06059	1.07554	1.08743	0.985215	0.958321	0.986586	0.959814	1.03788	1.02337	1.03437	1.02981	1.00879	1.01188	1.0193	1.01897	0.97583	0.962113	1.02033	1.02214
297	CATG00000076290.1	CATG00000076290.1	ASO_C0008822_10	Targeted lncRNA	r5b3p1	0.895001	0.941398	0.905719	0.869163	0.940908	0.939056	0.992193	0.986702	1.09282	1.08125	1.14688	1.14164	0.927025	0.905909	0.921265	0.907277	1.00768	0.994065	1.02608	1.0075	0.946052	0.93587	0.95996	0.952816	0.894329	0.880761	1.04179	1.03694
298	CATG00000079799.1	CATG00000079799.1	ASO_C0008586_03	Targeted lncRNA	r5b3p5	0.998075	1.02071	1.00337	1.0381	0.916317	0.953306	0.981693	0.985771	1.07722	1.02743	1.04663	1.02312	0.957867	0.977042	0.959133	0.978666	1.02142	1.02131	1.01951	1.01966	1.04156	1.05003	1.05006	1.05935	0.980592	1.00804	0.998243	0.994762
299	CATG00000079799.1	CATG00000079799.1	ASO_C0008586_04	Targeted lncRNA	r5b3p5	0.927062	0.977912	0.939191	0.98383	0.93728	0.993558	0.983448	0.996169	1.05827	1.04175	1.09543	1.06153	0.92996	1.00118	0.926003	0.994559	0.999614	0.999857	1.00605	1.01137	1.0061	0.99623	1.01705	1.00563	0.939641	0.982522	1.00985	1.0108
300	CATG00000079799.1	CATG00000079799.1	ASO_C0008586_05	Targeted lncRNA	r5b3p5	1.03157	0.939768	0.929382	0.999719	1.07766	1.00757	1.02013	1.00654	0.985173	1.03344	1.02902	1.06354	1.0236	1.01875	1.01337	1.01674	0.956958	1.00799	0.982604	1.01819	0.908271	0.978335	0.914088	0.985294	0.949204	0.987998	1.03247	1.02735
301	CATG00000079799.1	CATG00000079799.1	ASO_C0008586_07	Targeted lncRNA	r5b3p5	0.796193	0.990312	0.979061	1.00173	0.978984	0.990205	0.995499	0.999714	1.05755	1.03226	1.03934	1.02779	0.971429	1.00365	0.963617	0.999027	0.986491	1.00993	0.994029	1.01482	0.994195	0.997012	1.00374	1.00632	0.97425	0.991504	1.00445	1.00975
302	CATG00000079799.1	CATG00000079799.1	ASO_C0008586_10	Targeted lncRNA	r5b3p5	0.998102	0.943583	0.976844	1.04147	0.968767	0.940724	0.994486	0.989823	1.0634	1.01265	1.09298	1.04812	0.983478	0.985669	0.979459	0.989119	1.00119	1.04968	1.0184	1.04513	1.00256	1.04146	1.01604	1.05019	0.974869	1.00307	1.0204	1.01079
303	CATG00000079799.1	CATG00000079799.1	ASO_C0008586_AD_01	Targeted lncRNA	r13b3ADp1	1.01585	0.954744	1.03485	0.96072	1.03888	0.975534	1.00473	0.992483	0.976209	1.01591	0.965268	1.02538	1.03751	0.964393	1.03183	0.963053	1.00026	0.984878	0.988787	0.984817	1.02508	0.988799	1.01603	0.9882	1.04453	0.972707	0.977202	0.997001
304	CATG00000079799.1	CATG00000079799.1	ASO_C0008586_AD_02	Targeted lncRNA	r13b3ADp1	0.924946	0.866677	0.930597	1.11811	1.05533	1.05408	1.0191	1.00902	0.984967	1.02923	0.991739	0.992592	1.00353	1.08535	1.00243	1.08496	0.949167	1.02685	0.964578	1.01492	0.933118	1.03181	0.931411	1.03142	0.969967	1.0739	1.00715	0.99547
305	CATG00000079799.1	CATG00000079799.1	ASO_C0008586_AD_03	Targeted lncRNA	r13b3ADp1	0.86387	0.815703	1.01599	1.03354	1.04411	1.05868	1.00578	0.99382	0.981349	0.972747	1.00135	1.00259	1.03549	1.04771	1.02366	1.04185	0.974726	0.990082	0.982815	0.989526	0.992901	1.00821	0.995463	1.01147	1.01642	1.03339	0.995799	0.993516
306	CATG00000079799.1	CATG00000079799.1	ASO_C0008586_AD_06	Targeted lncRNA	r13b3ADp1	0.877447	0.766132	1.05297	1.06138	1.0326	1.0474	0.996445	1.00045	0.985039	0.995085	0.964527	0.972616	1.03586	1.05561	1.03422	1.04907	1.0049	0.99392	0.9894	0.992039	1.05982	1.04458	1.05638	1.04035	1.05369	1.06521	0.975786	0.973823
307	CATG00000079799.1	CATG00000079799.1	ASO_C0008586_AD_09	Targeted lncRNA	r13b3ADp1	0.953144	0.916743	1.01917	0.986068	1.03635	0.99775	1.0035	0.999478	0.994798	1.01833	0.991955	1.01971	1.03889	0.992304	1.03566	0.979662	0.979684	0.977369	0.978153	0.982295	0.993168	0.999813	0.994786	1.00056	1.03494	0.995004	0.992818	0.996482
308	CATG00000083589.1	CATG00000083589.1	ASO_C0010207_02	Targeted lncRNA	r5b3p5	1.098	0.992019	1.0276	1.099	1.02786	1.00171	0.999361	1.00297	1.00882	1.0307	0.984659	0.979678	1.0331	1.04261	1.02825	1.04885	0.99967	1.04617	0.996519	1.03377	1.00972	1.04827	1.02013	1.05228	1.0282	1.05705	0.990765	0.992056
309	CATG00000083589.1	CATG00000083589.1	ASO_C0010207_03	Targeted lncRNA	r5b3p5	1.01415	0.883588	0.976188	1.17894	1.00392	0.982981	0.998204	0.996782	1.00692	1.0286	1.035	0.995327	0.998078	1.07134	0.987079	1.0696	0.993215	1.07027	1.00284	1.05086	0.97647	1.09647	0.98326	1.09669	0.978232	1.10216	1.01597	0.999624
310	CATG00000083589.1	CATG00000083589.1	ASO_C0010207_04	Targeted lncRNA	r5b3p5	0.886626	0.888827	0.954365	1.20019	0.92366	1.02362	0.987787	1.01956	1.06636	1.05023	1.11574	0.970523	0.942703	1.11203	0.942052	1.11793	0.998877	1.07251	1.0073	1.07041	0.982702	1.03572	0.997233	1.03445	0.943386	1.09933	1.03212	1.01185
311	CATG00000083589.1	CATG00000083589.1	ASO_C0010207_06	Targeted lncRNA	r5b3p5	0.859852	0.854996	0.930738	0.892846	0.921325	0.977745	0.979047	1.00082	1.06747	1.01181	1.15398	1.11258	0.925364	0.950402	0.909399	0.93469	0.982346	0.957355	1.0109	0.988354	0.999184	0.922694	1.01891	0.933837	0.92395	0.915	1.03158	1.03236
312	CATG00000083589.1	CATG00000083589.1	ASO_C0010207_07	Targeted lncRNA	r5b3p5	0.933746	0.963874	0.998634	0.934436	0.96041	1.02232	0.99537	1.00114	1.07483	1.0172	1.10846	1.01836	0.978096	0.97699	0.970452	0.972396	1.00312	0.956766	1.02282	0.976338	0.989455	0.940797	0.999425	0.951171	0.966543	0.959592	1.03035	1.01422
313	CATG00000089639.1	CATG00000089639.1	ASO_G0223811_01	Targeted lncRNA	r2b1p2	0.597878	0.546583	0.964834	1.00008	0.906128	0.886651	0.974103	0.97473	1.07572	1.06003	1.09494	1.05655	0.929054	0.926428	0.927342	0.926057	1.03713	1.03566	1.0288	1.03737	1.05015	1.06974	1.04654	1.06602	0.939086	0.961355	1.00606	1.00385
314	CATG00000089639.1	CATG00000089639.1	ASO_G0223811_03	Targeted lncRNA	r2b1p2	0.947988	0.953404	0.94099	0.927973	0.943064	0.99399	0.990445	0.994684	1.06303	0.997191	1.08426	0.993812	0.945879	0.953913	0.943277	0.954113	1.00645	0.965139	1.01221	0.967945	0.981359	0.990053	0.988593	0.990075	0.936259	0.962155	1.02173	0.983853
315	CATG00000089639.1	CATG00000089639.1	ASO_G0223811_04	Targeted lncRNA	r2b1p2	0.694481	0.660302	0.97629	1.08817	0.936879	0.934176	0.967686	0.974659	1.03343	1.02218	1.01544	0.956063	0.94225	0.979682	0.93845	0.980825	1.00034	1.05755	0.985552	1.02079	1.05963	1.12805	1.05191	1.11746	0.991867	1.06589	0.970298	0.965355
316	CATG00000089639.1	CATG00000089639.1	ASO_G0223811_05	Targeted lncRNA	r2b1p2	1.04203	1.03847	0.921253	0.922567	0.893393	0.927136	0.9767	0.979165	1.05407	1.0259	1.06137	0.988303	0.900827	0.919897	0.90131	0.928988	1.00298	0.992302	1.00751	0.98239	0.999351	1.0134	1.00518	1.01769	0.919928	0.968399	1.01097	0.985568
317	CATG00000089639.1	CATG00000089639.1	ASO_G0223811_06	Targeted lncRNA	r2b1p2	0.699463	0.734073	0.911024	0.933464	0.880169	0.856965	0.969059	0.958618	1.0409	1.07472	1.04743	1.09529	0.882777	0.878179	0.892962	0.888569	1.04673	1.06242	1.02336	1.03123	1.02985	1.05266	1.03089	1.05982	0.917287	0.925893	1.00178	1.01008
318	CATG00000089639.1	CATG00000089639.1	ASO_G0223811_AD_02	Targeted lncRNA	r15bALLp6	1.02057	1.00534	1.03314	0.993077	0.970548	0.983063	0.999536	0.997797	1.0444	1.01569	1.08354	1.01921	1.0098	0.982647	1.01117	0.983651	1.0318	1.00846	1.04154	1.01271	0.985389	0.980025	0.987898	0.98202	0.984605	0.974217	1.02968	1.01268
319	CATG00000089639.1	CATG00000089639.1	ASO_G0223811_AD_05	Targeted lncRNA	r15bALLp6	0.979304	1.13991	1.04397	1.0759	0.978872	1.00485	1.00795	1.00287	1.0087	1.00551	1.04476	0.997767	1.01608	1.04055	1.01913	1.04218	1.04107	1.0449	1.04871	1.02987	0.988387	1.02711	0.994576	1.02416	0.987719	1.03374	1.03255	0.999879
320	CATG00000089639.1	CATG00000089639.1	ASO_G0223811_AD_06	Targeted lncRNA	r15bALLp6	0.999074	1.03819	1.06175	0.953986	0.999401	0.983668	1.01062	0.991675	1.01123	1.02822	1.04014	1.06607	1.04048	0.973387	1.03862	0.96466	1.03862	0.992968	1.04137	1.01219	0.998367	0.97218	0.999757	0.978786	1.01129	0.947834	1.02958	1.01978
321	CATG00000089639.1	CATG00000089639.1	ASO_G0223811_AD_07	Targeted lncRNA	r15bALLp6	0.746973	0.854314	0.962597	0.936752	0.908161	0.965292	0.972701	0.992748	1.03465	0.984071	1.07927	0.981888	0.919016	0.939431	0.919966	0.935122	1.0187	0.967423	1.02228	0.966891	1.02228	1.00064	1.02398	0.997732	0.945033	0.962016	1.01262	0.972962
322	CATG00000089639.1	CATG00000089639.1	ASO_G0223811_AD_10	Targeted lncRNA	r15bALLp6	0.951707	1.09361	1.08211	0.974341	0.998095	0.964084	1.00692	0.998503	0.9921	1.01213	1.00777	1.02841	1.03634	0.963171	1.03751	0.960102	1.04292	1.00101	1.03166	1.00402	1.02683	0.990926	1.02802	0.991379	1.03779	0.968532	1.0118	1.01011
323	CATG00000090305.1	CATG00000090305.1	ASO_C0011140_02	Positive Control	r5b3p6	0.391687	0.514361	0.712181	0.673278	0.919127	0.892971	0.951747	0.955914	1.09836	1.1238	1.20956	1.26803	0.800909	0.780329	0.779222	0.7624	0.852947	0.880836	0.896568	0.915517	0.864891	0.842283	0.858332	0.852465	0.776563	0.747771	1.00833	1.0333
324	CATG00000090305.1	CATG00000090305.1	ASO_C0011140_06	Positive Control	r5b3p6	0.954844	1.0146	0.851146	0.916772	0.966274	0.933737	0.992809	0.982861	1.03096	1.04082	1.0444	1.0963	0.898421	0.920497	0.890489	0.914706	0.960573	1.01223	0.962656	1.01582	0.959052	0.983288	0.956683	0.980808	0.890497	0.910054	0.981159	1.01654
325	CATG00000090305.1	CATG00000090305.1	ASO_C0011140_07	Positive Control	r5b3p6	1.02771	1.04642	0.895736	1.02284	1.00141	0.994401	0.981715	0.997863	0.976389	1.00832	0.98402	1.02822	0.937052	1.01594	0.924409	1.0116	0.941668	1.032	0.933698	1.02676	1.01623	1.02767	1.00022	1.02441	0.953438	1.00439	0.941923	1.00008
326	CATG00000090305.1	CATG00000090305.1	ASO_C0011140_09	Positive Control	r5b3p6	0.943075	1.04028	0.945861	0.994414	1.0298	0.982546	0.987553	0.989432	0.967284	0.986722	0.936823	1.00605	0.97515	0.991693	0.964539	0.988296	0.966381	1.02103	0.941181	1.01387	1.04015	1.04143	1.00951	1.03729	1.0032	0.999976	0.943385	0.981884
327	CATG00000090305.1	CATG00000090305.1	ASO_C0011140_10	Positive Control	r5b3p6	1.13125	1.01157	0.924182	0.982017	1.00885	0.972476	0.984548	0.980536	0.990286	1.0374	1.00157	1.03474	0.967234	0.984737	0.957613	0.982061	0.971496	1.02071	0.965971	1.01679	1.01847	1.02848	1.00115	1.03756	0.970935	0.986114	0.959755	1.00478
328	CATG00000095991.1	CATG00000095991.1	ASO_C0012015_01	Targeted lncRNA	r14b9plusp4	0.934118	0.963637	0.965443	0.992039	0.94703	0.887428	0.994452	0.968121	1.05441	1.05571	1.03978	1.05998	0.950213	0.914971	0.951287	0.922442	1.0149	1.04563	1.02057	1.0339	1.00144	1.05267	1.0086	1.06051	0.953079	0.95629	1.0057	1.00312
329	CATG00000095991.1	CATG00000095991.1	ASO_C0012015_03	Targeted lncRNA	r14b9plusp4	0.878844	0.899499	0.936482	0.954248	1.00084	0.994347	1.00106	1.00382	1.02446	1.00055	1.05808	1.03128	0.974366	0.977122	0.967654	0.971757	0.970443	0.970789	0.985918	0.985421	0.93011	0.968699	0.948776	0.972746	0.944494	0.955059	1.02998	1.00566
330	CATG00000095991.1	CATG00000095991.1	ASO_C0012015_07	Targeted lncRNA	r14b9plusp4	0.165954	0.281906	0.818903	0.802563	0.942257	0.899304	0.953653	0.94765	1.08133	1.08685	1.14803	1.14988	0.866059	0.83133	0.856612	0.824392	0.912864	0.90422	0.918944	0.91554	0.917659	0.898936	0.918746	0.911955	0.872643	0.846472	1.00384	1.00924
331	CATG00000095991.1	CATG00000095991.1	ASO_C0012015_09	Targeted lncRNA	r14b9plusp4	0.905247	0.923659	1.01054	0.976956	1.04199	1.01189	1.00901	0.992171	1.00228	1.014	0.994213	1.03565	1.03412	0.988135	1.02235	0.978452	0.984685	0.990136	0.994806	1.00422	0.988164	0.993211	0.988563	0.993647	1.00964	0.962611	1.00803	1.00299
332	CATG00000095991.1	CATG00000095991.1	ASO_C0012015_10	Targeted lncRNA	r14b9plusp4	0.823627	0.863284	1.18784	1.11847	1.03569	1.07059	1.00595	1.0023	0.980956	0.95471	0.95581	0.929579	1.10844	1.09275	1.10834	1.08675	1.06294	1.01753	1.0399	0.995573	1.09691	1.07404	1.08676	1.06137	1.11581	1.09967	0.984461	0.961636
333	CATG00000095991.1	CATG00000095991.1	ASO_C0012015_AD_02	Targeted lncRNA	r13b3ADp1	1.02206	0.936822	0.993967	1.11874	1.03799	0.976436	0.998339	0.99538	0.984801	1.01316	0.974728	0.993004	1.01923	1.03304	1.01522	1.03895	0.976444	1.05515	0.971191	1.04132	1.00784	1.06769	0.99914	1.06069	1.0225	1.05535	0.974819	0.989
334	CATG00000095991.1	CATG00000095991.1	ASO_C0012015_AD_04	Targeted lncRNA	r13b3ADp1	0.893268	0.918103	0.987914	0.98482	1.0368	1.01621	1.00715	1.00181	0.980995	1.00126	0.959796	1.00172	1.01511	1.00426	1.0133	1.00578	0.96673	0.979228	0.964684	0.98684	1.00227	0.996651	0.995584	1.00197	1.02058	0.997956	0.973489	0.994942
335	CATG00000095991.1	CATG00000095991.1	ASO_C0012015_AD_05	Targeted lncRNA	r13b3ADp1	0.849964	0.877881	0.984775	1.03934	1.08253	1.04557	1.01887	1.00591	0.94502	0.974367	0.950032	0.979303	1.04015	1.04864	1.02814	1.04627	0.960686	0.996717	0.960439	0.99823	0.979328	1.00352	0.975742	1.00606	1.01553	1.03748	0.980953	0.996506
336	CATG00000095991.1	CATG00000095991.1	ASO_C0012015_AD_06	Targeted lncRNA	r13b3ADp1	0.743412	0.747717	0.900154	0.957122	0.9259	0.987566	0.974198	0.981386	1.06588	1.02963	1.12233	1.07268	0.907737	0.971407	0.907042	0.96446	0.998357	1.00776	0.996324	1.00708	0.983285	1.00153	0.987515	0.998757	0.915468	0.949005	1.01188	0.995526
337	CATG00000095991.1	CATG00000095991.1	ASO_C0012015_AD_09	Targeted lncRNA	r13b3ADp1	0.895302	0.836809	1.00605	0.998843	1.00438	1.04038	0.988552	1.00952	1.01609	1.00143	1.00247	1.00364	0.993928	1.03228	0.992044	1.02967	0.9941	0.98101	0.980948	0.985289	1.03142	0.97807	1.02967	0.982824	1.01885	1.01993	0.983143	0.996416
338	CATG00000098665.1	CATG00000098665.1	ASO_C0013450_01	Targeted lncRNA	r3b2p1	1.01783	0.988601	0.962071	0.919393	0.966925	0.952559	0.987727	0.982281	0.999777	0.997651	1.0184	1.0343	0.956843	0.933103	0.956832	0.940954	1.01735	1.01461	1.00415	1.00093	1.0294	1.02204	1.03274	1.02845	0.973292	0.954847	0.988561	0.992369
339	CATG00000098665.1	CATG00000098665.1	ASO_C0013450_02	Targeted lncRNA	r3b2p1	0.977066	0.970912	0.970817	1.04489	0.98282	1.05806	0.997604	1.02102	1.04958	1.03466	1.02592	1.01766	0.976809	1.06412	0.977687	1.06593	0.986284	0.982586	0.998784	1.00413	0.985438	0.955749	0.986213	0.964036	0.97287	1.03359	1.00386	1.02761
340	CATG00000098665.1	CATG00000098665.1	ASO_C0013450_03	Targeted lncRNA	r3b2p1	0.88805	0.839934	0.913864	0.891195	0.932445	1.02296	0.983739	1.00355	1.05364	1.03941	1.08938	1.07203	0.921275	0.965405	0.919627	0.949797	1.00644	0.954531	1.01543	0.983237	0.986267	0.915871	0.995792	0.929708	0.910282	0.907021	1.01488	1.02513
341	CATG00000098665.1	CATG00000098665.1	ASO_C0013450_06	Targeted lncRNA	r3b2p1	0.905636	0.835007	0.823117	0.932801	0.900798	0.896129	0.983863	0.9735	1.10119	1.09038	1.18691	1.1353	0.85096	0.909358	0.846045	0.907218	0.981636	1.03306	1.00547	1.04066	0.929389	1.0195	0.943651	1.02634	0.822907	0.906352	1.03772	1.02524
342	CATG00000098665.1	CATG00000098665.1	ASO_C0013450_07	Targeted lncRNA	r3b2p1	0.88118	0.821461	0.8466	0.940674	0.9332	0.949898	0.989483	0.992998	1.063	1.05868	1.15382	1.10816	0.89337	0.95658	0.884935	0.954034	0.980834	1.00587	0.993456	1.02254	0.935553	0.981537	0.945952	0.990879	0.856575	0.929128	1.03252	1.02484
343	CATG00000098665.1	CATG00000098665.1	ASO_C0013450_AD_01	Targeted lncRNA	r13b3ADp1	0.97875	1.00712	1.10018	0.935564	1.00666	1.00091	1.00852	0.99368	1.02683	1.00466	0.994737	1.01398	1.04994	0.974066	1.05165	0.972993	1.03763	0.97759	1.02758	0.982147	1.04427	0.974583	1.03915	0.972008	1.06099	0.961162	0.995779	0.996244
344	CATG00000098665.1	CATG00000098665.1	ASO_C0013450_AD_02	Targeted lncRNA	r13b3ADp1	0.979542	0.987091	0.96402	0.903702	1.05759	1.05342	1.00188	1.01395	0.993952	0.999386	0.978429	1.00069	1.01073	0.994498	1.01009	0.992391	0.963424	0.939223	0.960688	0.949384	0.974022	0.932793	0.972843	0.928114	1.00646	0.966103	0.991404	0.995024
345	CATG00000098665.1	CATG00000098665.1	ASO_C0013450_AD_03	Targeted lncRNA	r13b3ADp1	0.89208	0.967209	1.01108	0.994352	0.990022	1.0083	0.98877	0.987388	1.04857	1.02702	1.04131	1.00276	1.00012	0.989265	1.0013	0.988226	1.0036	0.977812	1.00559	0.971742	1.00953	1.01673	1.00956	1.02111	0.998067	1.00816	1.00364	0.986106
346	CATG00000098665.1	CATG00000098665.1	ASO_C0013450_AD_04	Targeted lncRNA	r13b3ADp1	0.911678	0.964987	0.952353	1.08132	0.999568	1.02126	0.993274	0.99156	1.02149	1.0124	1.02508	1.00782	0.974657	1.04218	0.968086	1.03812	0.971043	1.01952	0.969612	1.00867	0.998417	1.04029	1.00008	1.03772	0.987501	1.04464	0.993841	0.987073
347	CATG00000098665.1	CATG00000098665.1	ASO_C0013450_AD_09	Targeted lncRNA	r13b3ADp1	0.354631	0.503636	0.851857	0.832187	0.903391	0.874097	0.973819	0.96126	1.08609	1.10769	1.13257	1.1679	0.862029	0.839574	0.851378	0.834275	0.940264	0.956375	0.953215	0.964525	0.956388	0.970971	0.966989	0.97999	0.877852	0.865227	1.00999	1.01918
348	CATG00000098831.1	CATG00000098831.1	ASO_C0013510_01	Targeted lncRNA	r3b2p5	0.976389	1.0571	1.04236	0.992463	0.89352	0.913185	0.971765	0.983396	1.05103	1.01629	1.03721	1.01336	0.932569	0.942156	0.940191	0.952173	1.06939	1.05403	1.04637	1.02638	1.09115	1.06228	1.08573	1.06159	0.987572	0.98561	0.986371	0.988813
349	CATG00000098831.1	CATG00000098831.1	ASO_C0013510_03	Targeted lncRNA	r3b2p5	0.95319	0.889597	0.921418	0.926259	0.980532	0.954844	0.997244	0.995949	1.01855	1.00668	1.07802	1.08156	0.951345	0.934105	0.944125	0.930734	0.977953	0.992137	0.991151	1.00353	0.963867	0.966214	0.963375	0.968074	0.925952	0.913468	1.00892	1.0237
350	CATG00000098831.1	CATG00000098831.1	ASO_C0013510_06	Targeted lncRNA	r3b2p5	0.332966	0.478137	0.739056	0.846907	0.840403	0.861286	0.964461	0.972758	1.13047	1.11128	1.31064	1.2323	0.786942	0.845043	0.76941	0.834423	0.923887	0.987491	0.968408	1.01575	0.881959	0.949329	0.893329	0.95854	0.756286	0.826674	1.05641	1.04277
351	CATG00000098831.1	CATG00000098831.1	ASO_C0013510_07	Targeted lncRNA	r3b2p5	0.927099	0.94024	1.00048	0.928967	0.994344	0.935497	0.995963	0.98223	1.04013	1.02366	1.07118	1.09466	0.98936	0.922331	0.9841	0.921348	0.987285	0.974541	1.00673	0.992846	0.983992	1.00917	0.987868	1.01575	0.967128	0.934409	1.01339	1.0154
352	CATG00000098831.1	CATG00000098831.1	ASO_C0013510_08	Targeted lncRNA	r3b2p5	0.9911	0.986465	0.910621	1.00482	0.922897	1.00542	0.98809	1.00081	1.06815	1.00281	1.11699	1.04832	0.914852	1.01353	0.914563	1.01579	1.00194	1.00872	1.01482	1.02047	0.983192	0.996815	0.986499	0.996698	0.908085	0.994408	1.01868	1.01138
353	CATG00000098831.1	CATG00000098831.1	ASO_C0013510_AD_02	Targeted lncRNA	r13b3ADp2	0.814398	0.736298	0.984015	0.881327	0.940367	0.928479	0.981545	0.971947	0.997219	1.04414	1.00647	1.08739	0.940986	0.896428	0.944156	0.887264	1.01597	0.975267	0.995186	0.977079	1.05704	0.992788	1.04501	0.99819	0.983247	0.914821	0.977723	0.993256
354	CATG00000098831.1	CATG00000098831.1	ASO_C0013510_AD_04	Targeted lncRNA	r13b3ADp2	1.01812	0.982354	1.11139	1.02574	0.980683	0.947074	0.998388	0.981953	0.992776	1.03333	0.956969	1.02993	1.04835	0.980164	1.05723	0.985949	1.06133	1.04037	1.04325	1.02958	1.07743	1.05172	1.07351	1.0552	1.07388	0.999734	0.987051	1.00146
355	CATG00000098831.1	CATG00000098831.1	ASO_C0013510_AD_05	Targeted lncRNA	r13b3ADp2	0.902723	0.868115	1.02073	0.954011	1.00975	0.982408	0.999822	0.986808	0.991467	1.00504	0.975242	1.02727	1.01176	0.972287	1.0116	0.971545	0.996686	0.98745	0.990928	0.996568	1.01074	1.01058	1.01535	1.0162	1.02549	0.97521	0.992223	1.00465
356	CATG00000098831.1	CATG00000098831.1	ASO_C0013510_AD_08	Targeted lncRNA	r13b3ADp2	0.959886	0.914522	1.05395	1.05783	0.995307	0.967661	1.00432	1.00423	0.972548	1.04049	0.963021	1.02482	1.01539	1.00826	1.01952	1.00788	1.01792	1.02412	1.01219	1.02116	1.0374	1.02578	1.03566	1.02175	1.03338	1.01793	0.993017	1.00801
357	CATG00000098831.1	CATG00000098831.1	ASO_C0013510_AD_10	Targeted lncRNA	r13b3ADp2	1.11361	1.01463	0.968957	1.03544	1.03286	0.960729	1.00041	0.983009	0.958207	0.994776	0.964285	0.967863	1.00689	0.981527	1.00713	0.985194	0.990434	1.03117	0.987297	1.00986	0.994554	1.08289	0.993827	1.07731	0.993981	1.02437	0.985294	0.972372
358	CATG00000106837.1	CATG00000106837.1	ASO_C0015153_01	Targeted lncRNA	r5b3p6	1.00077	1.04588	0.934818	0.976425	0.942459	0.994772	0.987076	0.991315	1.04009	0.989195	1.04611	1.01146	0.937553	0.979357	0.936297	0.982652	1.00307	1.00519	0.999784	1.00274	1.00962	1.00019	1.01563	1.002	0.956941	0.978769	1.00395	1.0029
359	CATG00000106837.1	CATG00000106837.1	ASO_C0015153_03	Targeted lncRNA	r5b3p6	0.826203	0.899394	0.829429	0.832843	0.889501	0.904705	0.975318	0.977269	1.08002	1.08675	1.16129	1.1875	0.861621	0.871629	0.853205	0.868838	0.978279	0.980279	0.991115	0.999422	0.950467	0.940998	0.95545	0.958399	0.852554	0.853947	1.02774	1.03883
360	CATG00000106837.1	CATG00000106837.1	ASO_C0015153_04	Targeted lncRNA	r5b3p6	1.03843	0.937407	0.924311	0.948392	1.02751	1.01703	1.013	0.991773	0.999748	0.999901	1.02986	1.04061	0.995926	0.98892	0.993434	0.982741	0.964025	0.97634	0.980552	0.984465	0.932105	0.966624	0.939887	0.975121	0.954753	0.966503	1.01494	1.01322
361	CATG00000106837.1	CATG00000106837.1	ASO_C0015153_07	Targeted lncRNA	r5b3p6	1.01148	0.862069	0.955039	0.930696	0.984287	0.951416	0.98967	0.993587	1.0174	1.06297	1.06768	1.11117	0.975947	0.947542	0.969041	0.939605	1.01306	1.00937	1.02417	1.02669	0.983807	0.979447	0.991844	0.986535	0.945227	0.919133	1.02018	1.02818
362	CATG00000106837.1	CATG00000106837.1	ASO_C0015153_08	Targeted lncRNA	r5b3p6	1.03031	0.983433	0.91484	0.87582	0.962418	0.963558	0.995963	0.994612	1.02169	1.04104	1.07966	1.09709	0.95121	0.928941	0.949275	0.92825	0.996893	0.978827	1.01717	0.994651	0.951432	0.942043	0.966237	0.95522	0.91856	0.905383	1.03144	1.03323
363	CATG00000108369.1	CATG00000108369.1	ASO_C014559_01	Targeted lncRNA	r2b1p4	1.05021	0.862743	0.880216	0.871509	0.847075	0.926187	0.950414	0.959391	1.10674	1.04468	1.14152	1.07811	0.855514	0.888117	0.866858	0.895183	1.01921	0.991033	1.00915	0.974575	0.99018	0.991865	1.00388	0.991051	0.896338	0.916953	1.02748	0.990861
364	CATG00000108369.1	CATG00000108369.1	ASO_C014559_02	Targeted lncRNA	r2b1p4	0.952164	1.04122	0.967338	1.02942	0.971315	0.944927	1.00085	0.994558	1.01601	0.991533	1.04086	1.01545	0.974783	0.97415	0.974833	0.982779	1.01641	1.02815	1.02237	1.01527	0.991575	1.03085	0.991461	1.03388	0.95949	1.00204	1.01433	1.00099
365	CATG00000108369.1	CATG00000108369.1	ASO_C014559_06	Targeted lncRNA	r2b1p4	1.02599	1.08509	0.957344	0.859868	0.840372	0.865767	0.954812	0.971167	1.08425	1.09651	1.12366	1.12105	0.89304	0.855655	0.90239	0.867011	1.05453	1.01162	1.04577	1.01542	1.06829	0.962785	1.07615	0.975618	0.942538	0.867668	1.01773	1.02839
366	CATG00000108369.1	CATG00000108369.1	ASO_C014559_07	Targeted lncRNA	r2b1p4	0.959377	0.798515	0.905115	0.962719	0.939195	0.93536	0.995236	0.986877	1.03306	1.04109	1.057	1.04452	0.931985	0.950804	0.934717	0.959003	0.989845	1.03752	0.9996	1.02915	0.957851	1.01307	0.961793	1.01048	0.923793	0.949881	1.01813	1.00551
367	CATG00000108369.1	CATG00000108369.1	ASO_C014559_AD_01	Targeted lncRNA	r13b3ADp2	0.992329	0.961174	1.06268	1.0275	0.955876	1.01279	0.990066	1.00565	1.01472	0.980505	1.02572	0.991384	1.00048	1.01778	1.00717	1.01921	1.03408	1.00464	1.0238	1.00614	1.04692	1.01307	1.04515	1.01093	1.01846	1.01639	1.00187	1.00484
368	CATG00000108369.1	CATG00000108369.1	ASO_C014559_AD_03	Targeted lncRNA	r13b3ADp2	1.02961	0.880651	1.13115	0.993328	0.996612	1.04375	0.990388	1.01498	0.972267	0.954964	0.970691	0.985481	1.04754	1.03526	1.05647	1.03162	1.04402	0.993147	1.02393	1.00717	1.07177	0.971878	1.06831	0.971805	1.07399	0.995302	0.978155	1.00669
369	CATG00000108369.1	CATG00000108369.1	ASO_C014559_AD_05	Targeted lncRNA	r13b3ADp2	0.874541	0.828235	0.974894	0.965048	0.948995	0.95394	0.982798	0.988898	1.01199	1.03618	1.04419	1.04005	0.950077	0.94373	0.947338	0.941305	0.999209	0.992061	1.0042	0.987916	1.0298	1.01208	1.04154	1.01216	0.966745	0.96026	0.999348	0.997552
370	CATG00000108369.1	CATG00000108369.1	ASO_C014559_AD_06	Targeted lncRNA	r13b3ADp2	0.76451	0.799054	0.886818	0.914026	0.939939	0.955764	0.984513	0.984045	1.07134	1.05626	1.13523	1.07753	0.912735	0.927873	0.898732	0.919955	0.982684	0.97664	1.00168	0.991605	0.955574	0.969138	0.969637	0.987789	0.887575	0.927962	1.0306	1.01882
371	CATG00000108369.1	CATG00000108369.1	ASO_C014559_AD_07	Targeted lncRNA	r13b3ADp2	0.938064	0.881323	0.999221	1.00607	0.952708	0.980119	0.994472	1.00338	1.00626	1.01081	1.03236	1.03004	0.971064	0.987861	0.97115	0.980441	1.00996	1.01424	1.01559	1.01042	1.02665	1.02549	1.02989	1.02686	0.980701	0.990699	1.00246	0.999162
372	CATG00000117597.1	CATG00000117597.1	ASO_C0015779_01	Positive Control	r5b3p6	1.0005	1.01529	1.08017	0.984151	0.992907	0.998938	1.00422	0.984141	0.995678	0.988237	1.00492	0.977994	1.04595	0.988392	1.04603	0.98958	1.05967	1.00589	1.05301	0.992421	1.01094	1.03408	1.01013	1.03336	1.0254	1.00377	1.02191	0.978006
373	CATG00000117597.1	CATG00000117597.1	ASO_C0015779_02	Positive Control	r5b3p6	0.899067	0.971834	0.97792	1.0157	1.01064	0.95838	0.999299	0.986465	1.05917	1.02844	1.03884	1.04097	0.998046	0.988014	0.992964	0.990528	0.985521	1.03674	0.997934	1.03872	0.992662	1.04329	0.999543	1.05613	0.986991	1.00377	1.00332	1.00762
374	CATG00000117597.1	CATG00000117597.1	ASO_C0015779_06	Positive Control	r5b3p6	0.985094	0.975331	0.902271	0.879109	0.962799	0.914601	0.990701	0.980666	1.0522	1.05172	1.06837	1.13916	0.937935	0.888453	0.933266	0.882077	0.983622	0.983539	0.982466	1.00003	0.975696	0.975127	0.980852	0.986127	0.926978	0.886015	1.01027	1.02973
375	CATG00000117597.1	CATG00000117597.1	ASO_C0015779_07	Positive Control	r5b3p6	0.983859	0.890318	1.08067	1.02006	0.96796	0.978005	0.996725	0.987066	1.02848	1.03009	1.05522	1.04559	1.02429	1.00537	1.02346	1.00914	1.06487	1.04915	1.0602	1.03385	1.03739	1.03179	1.03981	1.03623	1.01227	0.999324	1.01837	1.01087
376	CATG00000117597.1	CATG00000117597.1	ASO_C0015779_08	Positive Control	r5b3p6	0.975319	0.999518	0.938412	0.952417	0.972664	0.975299	0.987537	0.98985	1.04691	1.03148	1.06059	1.08203	0.964697	0.969677	0.954632	0.962906	0.978883	1.00432	0.998252	1.00875	0.977291	0.982704	0.985352	0.984265	0.946423	0.937559	1.01239	1.01442
377	CATGC0000023317	CATGC0000023317	ASO_C023317_01	Targeted lncRNA	r2b1p4	0.837496	0.878669	0.911782	1.05623	0.998255	0.893828	0.995945	0.974046	1.03192	1.06862	1.06919	1.07027	0.961454	0.949461	0.952547	0.957908	0.973644	1.07492	0.987063	1.05667	0.957501	1.06647	0.961829	1.06658	0.935827	0.978353	1.01319	1.01089
378	CATGC0000023317	CATGC0000023317	ASO_C023317_02	Targeted lncRNA	r2b1p4	1.2242	1.29534	1.20476	0.972249	0.949139	0.997288	0.977468	0.99053	1.00836	1.07681	0.975646	1.07479	1.03737	0.99061	1.05027	0.989487	1.14696	1.00563	1.08609	1.01548	1.19272	0.972345	1.17306	0.978217	1.09848	0.967169	0.96768	1.02047
379	CATGC0000023317	CATGC0000023317	ASO_C023317_03	Targeted lncRNA	r2b1p4	1.15758	0.96218	0.837978	0.943117	0.854658	0.976219	0.96192	0.991531	1.08675	1.05502	1.13619	1.0844	0.826513	0.958985	0.833284	0.952253	1.01299	0.983036	1.01473	0.995751	0.968232	0.954025	0.985755	0.959949	0.845959	0.938461	1.02686	1.01805
380	CATGC0000023317	CATGC0000023317	ASO_C023317_04	Targeted lncRNA	r2b1p4	0.874923	0.862077	1.15423	0.890385	0.897329	0.864471	0.967923	0.97285	0.975578	1.09091	0.899319	1.14867	0.985757	0.876923	1.00581	0.887259	1.10165	1.05537	1.03622	1.05246	1.19041	0.989873	1.17121	0.999735	1.12046	0.879224	0.938741	1.03569
381	CATGC0000023317	CATGC0000023317	ASO_C023317_07	Targeted lncRNA	r2b1p4	1.05557	1.09003	0.922414	1.05684	0.991324	1.0316	1.00303	1.00104	1.00784	0.955636	1.01947	0.90468	0.971167	1.04173	0.969957	1.04828	0.980739	1.02987	0.986211	1.00532	0.941178	1.06035	0.945032	1.05161	0.953715	1.06679	1.00866	0.963651
382	CATGE0000171943	CATGE0000171943	ASO_G0236933_03	Targeted lncRNA	r14b9plusp4	0.775198	0.768926	0.939154	0.971798	0.928544	0.869201	0.977974	0.956801	1.04918	1.05135	1.04508	1.02522	0.924324	0.883939	0.928324	0.898305	1.01476	1.0379	0.99937	1.00854	1.00772	1.05959	1.01362	1.06484	0.9562	0.954067	0.994367	0.981472
383	CATGE0000171943	CATGE0000171943	ASO_G0236933_05	Targeted lncRNA	r14b9plusp4	0.95683	0.956549	1.1072	1.06071	0.94873	0.948893	0.985675	0.989967	1.03472	1.02434	1.03086	0.996075	1.00353	0.989514	1.00554	1.00124	1.06036	1.03128	1.04449	1.01916	1.07298	1.04838	1.06964	1.05383	1.03415	1.02891	0.996884	0.995434
384	CATGE0000171943	CATGE0000171943	ASO_G0236933_06	Targeted lncRNA	r14b9plusp4	0.994732	0.999677	1.0564	1.01965	1.02669	0.960479	0.992919	0.990291	0.983433	0.993101	0.924511	0.989226	1.02891	0.979477	1.03944	0.988469	1.01523	1.0134	0.986628	1.00308	1.04805	1.02404	1.04597	1.02328	1.0592	1.01826	0.968064	0.991983
385	CATGE0000171943	CATGE0000171943	ASO_G0236933_07	Targeted lncRNA	r14b9plusp4	0.939747	0.987095	0.991184	1.06769	0.986484	0.997278	0.995051	0.999202	1.0045	0.997036	1.01417	1.00391	0.988768	1.02564	0.989503	1.02902	0.996504	1.03209	0.990588	1.01818	1.00395	1.04004	0.991926	1.03132	0.993105	1.04	0.994778	0.994122
386	CATGE0000171943	CATGE0000171943	ASO_G0236933_08	Targeted lncRNA	r14b9plusp4	0.96648	0.996289	0.958212	0.967578	0.978113	1.00719	1.00263	0.998919	1.03144	0.98841	1.044	0.992859	0.968566	0.989072	0.967545	0.995321	0.999311	0.995407	1.00563	0.993365	0.980194	0.974249	0.984187	0.980847	0.955125	0.980278	1.01774	1.00274
387	CD27-AS1	CD27-AS1	ASO_G0215039_01	Targeted lncRNA	r4b4p1	0.456177	0.460736	0.853889	0.896192	0.876977	0.910928	0.956282	0.980214	1.10935	1.07078	1.19281	1.13795	0.853155	0.898598	0.841075	0.893282	0.951654	0.985578	0.968956	1.0063	0.957633	0.955769	0.96841	0.962775	0.87526	0.891187	1.02255	1.03766
388	CD27-AS1	CD27-AS1	ASO_G0215039_03	Targeted lncRNA	r4b4p1	0.970395	0.954375	1.01549	1.05286	0.945591	1.01846	0.982205	1.00406	1.01534	1.01483	1.02667	1.00581	0.96797	1.03425	0.964862	1.0333	1.01683	1.02422	1.01034	1.01354	1.0377	1.01688	1.04149	1.01381	0.999835	1.03104	1.00494	1.00687
389	CD27-AS1	CD27-AS1	ASO_G0215039_05	Targeted lncRNA	r4b4p1	0.914335	0.971298	1.03617	1.00765	0.983206	0.955069	0.987567	0.986382	1.00329	1.02427	1.03347	1.0207	0.998698	0.974575	0.994895	0.971178	1.01601	1.01484	1.01206	1.01114	1.04629	1.04273	1.04428	1.03575	1.00309	0.9903	1.00035	0.99382
390	CD27-AS1	CD27-AS1	ASO_G0215039_06	Targeted lncRNA	r4b4p1	0.959504	0.98927	0.98516	0.9872	0.937701	1.0286	0.992291	1.0014	1.05881	1.01288	1.09906	1.03747	0.962121	1.01997	0.965545	1.01843	1.0268	1.01257	1.03436	1.01361	0.990436	0.960526	1.00412	0.966758	0.95438	0.979746	1.03613	1.02597
391	CD27-AS1	CD27-AS1	ASO_G0215039_08	Targeted lncRNA	r4b4p1	0.967986	1.0031	1.02203	1.00274	1.02592	0.941723	1.00584	0.992428	0.991705	1.03361	1.00317	1.04413	1.03309	0.959779	1.01948	0.960108	1.02211	1.01581	1.01716	1.02195	1.04281	1.01429	1.03418	1.0171	1.01804	0.969245	0.990265	1.00576
392	CD27-AS1	CD27-AS1	ASO_G0215039_AD_01	Targeted lncRNA	r11b1ADp1	0.92724	0.949376	1.03243	1.09024	1.01955	1.00486	1.00526	1.00021	0.980447	0.998147	0.993573	0.988197	1.0241	1.02999	1.01388	1.02341	1.00599	1.02276	0.999292	1.01952	1.01549	1.03879	1.0092	1.0333	1.025	1.04549	0.992132	0.997133
393	CD27-AS1	CD27-AS1	ASO_G0215039_AD_05	Targeted lncRNA	r11b1ADp1	0.73539	0.765813	0.93787	0.937528	0.991338	0.941698	0.993506	0.986415	1.00314	1.02566	0.998137	1.02649	0.965771	0.925889	0.961208	0.925191	0.983549	0.990918	0.971969	0.980878	0.986657	0.997018	0.98277	1.00011	0.972498	0.956984	0.993606	0.996832
394	CD27-AS1	CD27-AS1	ASO_G0215039_AD_07	Targeted lncRNA	r11b1ADp1	0.792418	0.763241	1.01595	1.00726	0.998059	1.00778	0.998984	0.994029	1.00968	0.986135	1.00434	0.995618	1.00642	1.00418	0.998402	0.997692	0.997342	0.963614	0.996	0.978319	1.01998	1.01928	1.01928	1.02079	1.01138	1.02682	1.00086	0.996702
395	CD27-AS1	CD27-AS1	ASO_G0215039_AD_08	Targeted lncRNA	r11b1ADp1	0.754719	0.801333	0.952945	1.03106	0.99298	1.02885	0.985176	0.994334	1.00786	0.99314	1.03589	0.987046	0.966239	1.02691	0.962275	1.0193	0.986742	0.993747	0.990481	0.994997	0.994049	1.01832	0.999729	1.01209	0.968004	1.02618	1.00689	0.989294
396	CD27-AS1	CD27-AS1	ASO_G0215039_AD_09	Targeted lncRNA	r11b1ADp1	0.937008	0.91836	1.06962	1.08849	1.02712	1.07285	1.00176	1.01658	1.00936	0.97877	0.992005	0.989058	1.04567	1.09052	1.03967	1.0885	1.01928	1.00836	1.02121	1.02458	1.02179	0.993648	1.01865	0.98813	1.0362	1.04976	1.0033	1.0164
397	CD99P1	CD99P1	ASO_G0223773_01	Targeted lncRNA	r4b4p2	1.03334	1.0477	0.989265	1.00861	0.930179	0.981775	0.987972	0.985065	1.03685	1.01205	0.995088	1.00867	0.952329	0.975808	0.966746	0.971525	1.0298	1.00663	1.00685	1.00361	1.05334	1.03676	1.05278	1.03923	1.00875	1.0008	0.990175	0.990287
398	CD99P1	CD99P1	ASO_G0223773_05	Targeted lncRNA	r4b4p2	0.994485	1.02264	0.958676	1.06712	1.0298	1.02022	0.999739	0.994192	0.992301	1.01886	0.977209	1.04139	0.998991	1.0514	0.989241	1.05369	0.978962	1.04381	0.97873	1.04128	0.99475	1.02329	0.994135	1.02161	0.996273	1.03093	0.987441	1.01677
399	CD99P1	CD99P1	ASO_G0223773_06	Targeted lncRNA	r4b4p2	0.946278	0.978989	0.967397	0.977042	1.02238	0.967263	1.00363	1.00254	1.00152	1.03938	1.01824	1.07409	1.00428	0.965336	1.00025	0.967293	0.986807	1.01497	0.985938	1.03055	0.981251	0.967572	0.974739	0.974876	0.985095	0.946706	0.997306	1.03379
400	CD99P1	CD99P1	ASO_G0223773_07	Targeted lncRNA	r4b4p2	0.913916	0.858525	0.944174	0.940634	1.02587	0.941016	1.00317	0.986221	0.993773	1.04365	0.96263	1.03763	0.984492	0.937529	0.982014	0.935967	0.953684	0.984382	0.956929	0.986002	0.984379	1.00187	0.975385	1.00499	0.987702	0.957124	0.973282	0.999671
401	CD99P1	CD99P1	ASO_G0223773_10	Targeted lncRNA	r4b4p2	1.00707	1.03747	1.01721	1.0556	0.97581	0.994576	0.990285	0.991533	1.04145	1.05104	1.03942	1.06734	0.995636	1.0331	0.992685	1.03316	1.02188	1.02827	1.01339	1.03563	1.03199	1.00202	1.03203	1.00924	1.00848	1.0135	1.0012	1.02172
402	CDKN2C	CDKN2C	ASO_C0000830_02	Positive Control	r5b3p1	1.09899	1.13407	0.923476	0.959612	0.976198	0.995453	0.983917	0.995504	1.04012	1.06522	1.04442	1.02563	0.947944	0.982967	0.948082	0.987743	1.00057	1.00336	0.992433	0.996308	1.006	0.987211	1.00298	0.986775	0.954857	0.981833	0.990833	0.999316
403	CDKN2C	CDKN2C	ASO_C0000830_04	Positive Control	r5b3p1	0.810749	0.773728	0.83505	0.849104	0.907883	0.895337	0.975309	0.974571	1.06513	1.10687	1.11868	1.18581	0.859854	0.867281	0.858605	0.860403	0.972672	0.984173	0.983079	1.00124	0.958894	0.953086	0.965884	0.970725	0.853392	0.848274	1.01351	1.03735
404	CDKN2C	CDKN2C	ASO_C0000830_05	Positive Control	r5b3p1	1.05654	1.06034	0.934218	0.960524	0.993752	0.958469	0.998747	0.987835	1.01381	1.03589	1.03144	1.03979	0.967015	0.956115	0.966424	0.956194	0.983073	1.0034	0.979972	1.00255	0.980679	1.02702	0.978514	1.02487	0.955653	0.964052	0.996684	1.00086
405	CDKN2C	CDKN2C	ASO_C0000830_07	Positive Control	r5b3p1	1.033	0.979937	0.973176	0.973209	1.00804	0.988545	0.993645	0.995804	1.01622	1.02155	1.04541	1.04703	0.990118	0.977663	0.98309	0.976705	0.995053	1.00229	1.0012	1.00053	0.976769	0.994325	0.985295	1.00126	0.966935	0.970412	1.00523	1.01479
406	CDKN2C	CDKN2C	ASO_C0000830_08	Positive Control	r5b3p1	0.987451	0.946642	0.922431	0.93287	0.937734	0.955977	0.979614	0.983865	1.04297	1.0675	1.0815	1.1029	0.925019	0.939917	0.926909	0.934083	1.00886	1.00594	1.00103	1.01569	0.991128	0.977099	0.998803	0.985532	0.928556	0.923014	1.00835	1.02523
407	CKMT2-AS1	CKMT2-AS1	ASO_G0247572_01	Targeted lncRNA	r8b7p5	0.982699	0.970921	0.952282	0.933945	0.978755	0.952825	1.00298	0.98857	0.99807	1.05049	1.01038	1.06517	0.969898	0.938568	0.969868	0.935928	0.990787	0.987768	1.00014	0.990927	0.973981	0.98884	0.968939	0.990394	0.953502	0.948746	1.00292	1.00622
408	CKMT2-AS1	CKMT2-AS1	ASO_G0247572_03	Targeted lncRNA	r8b7p5	0.883118	0.963438	1.03296	0.960016	0.969468	0.951885	0.989296	0.994449	1.02572	1.03146	1.05201	1.06976	0.992696	0.952749	0.991511	0.958025	1.02519	1.00784	1.02732	1.00694	1.01912	0.97346	1.018	0.980536	0.994605	0.958313	1.00893	1.01706
409	CKMT2-AS1	CKMT2-AS1	ASO_G0247572_07	Targeted lncRNA	r8b7p5	0.937938	0.988254	0.960547	1.00103	0.992834	1.00513	0.997822	1.00129	1.03046	1.03084	1.04481	1.0411	0.977822	1.00477	0.970286	1.00093	0.978519	1.0001	0.990193	1.004	0.976073	0.967973	0.982107	0.982923	0.961954	0.988615	1.00372	1.01791
410	CKMT2-AS1	CKMT2-AS1	ASO_G0247572_08	Targeted lncRNA	r8b7p5	0.948455	1.03719	1.02116	1.10393	0.89825	0.89556	0.970869	0.972478	1.05223	1.04357	1.07835	1.02618	0.937514	0.964644	0.938278	0.974054	1.05352	1.0834	1.03707	1.0583	1.07117	1.10291	1.07917	1.11093	0.97479	1.0299	0.99885	1.00001
411	CKMT2-AS1	CKMT2-AS1	ASO_G0247572_09	Targeted lncRNA	r8b7p5	0.919882	0.964142	0.979583	0.92898	1.01966	0.966207	0.998029	0.994629	1.01527	1.05518	1.02902	1.05287	0.99864	0.948439	0.992065	0.947624	0.983458	0.991765	0.995816	0.993298	0.974214	0.963435	0.973424	0.969518	0.975581	0.944037	1.01222	1.00793
412	CLDN22	CLDN22	ASO_C0008202_01	Positive Control	r5b3p5	0.931433	0.903624	1.01363	1.02644	0.973953	1.03856	0.999042	0.996565	1.00169	0.941116	1.00994	0.98626	0.988134	1.02769	0.98645	1.02543	1.02387	0.993843	1.01768	0.987948	1.02837	1.01147	1.02459	1.0085	0.988405	1.03443	0.995337	0.995239
413	CLDN22	CLDN22	ASO_C0008202_02	Positive Control	r5b3p5	0.985337	0.930098	1.0193	0.944686	0.936741	0.892616	0.996861	0.98078	1.025	1.07078	1.07014	1.09677	0.98123	0.911895	0.982932	0.908733	1.04757	1.00252	1.04363	1.01056	1.03523	1.01147	1.03796	1.02712	0.986682	0.938474	1.01512	1.01345
414	CLDN22	CLDN22	ASO_C0008202_04	Positive Control	r5b3p5	0.861486	0.863401	0.958287	0.971468	0.901779	0.950715	0.976376	0.996754	1.07165	1.07062	1.11051	1.09223	0.927583	0.957871	0.925883	0.955684	1.01255	1.0123	1.01318	1.02168	1.02668	0.974117	1.03729	0.982039	0.952165	0.943293	1.01449	1.02627
415	CLDN22	CLDN22	ASO_C0008202_05	Positive Control	r5b3p5	0.997227	0.906741	0.931826	0.973662	0.922608	0.904519	0.988776	0.979204	1.04512	1.06096	1.07724	1.0847	0.930138	0.930132	0.922488	0.92791	1.00166	1.02672	1.00833	1.01896	1.00549	1.04718	1.0226	1.05851	0.943313	0.965106	1.01726	1.00158
416	CLDN22	CLDN22	ASO_C0008202_09	Positive Control	r5b3p5	0.947066	0.863972	0.874997	0.893357	0.90597	0.923608	0.98187	0.987065	1.08711	1.06323	1.16712	1.12089	0.888409	0.908699	0.880809	0.901946	0.977784	0.980014	1.00384	1.00491	0.965116	0.978333	0.970367	0.989799	0.87907	0.903871	1.03212	1.02539
417	COX10-AS1	COX10-AS1	ASO_G0236088_02	Targeted lncRNA	r6b5p5	0.838149	0.915859	0.945843	0.914836	0.946308	0.953248	0.982613	0.985625	1.03541	1.01401	1.06986	1.04151	0.941446	0.925583	0.93805	0.929708	1.00207	0.991261	1.00585	0.979502	1.00299	1.00166	1.00246	0.995793	0.933624	0.936558	0.99985	0.993446
418	COX10-AS1	COX10-AS1	ASO_G0236088_03	Targeted lncRNA	r6b5p5	0.309767	0.344564	0.69614	0.711635	0.856788	0.883829	0.958775	0.968291	1.1722	1.13744	1.31046	1.2795	0.768209	0.792085	0.742184	0.767776	0.890192	0.882636	0.935018	0.927666	0.860392	0.874571	0.882182	0.894117	0.748012	0.767991	1.06331	1.04865
419	COX10-AS1	COX10-AS1	ASO_G0236088_07	Targeted lncRNA	r6b5p5	0.592613	0.628469	0.911313	0.848618	0.963287	0.939464	0.981882	0.974422	1.05854	1.08873	1.11166	1.16507	0.929125	0.8931	0.910871	0.87182	0.981985	0.928004	0.984785	0.955577	0.992873	0.947686	0.987147	0.944618	0.916788	0.871225	1.00324	1.0165
420	COX10-AS1	COX10-AS1	ASO_G0236088_08	Targeted lncRNA	r6b5p5	0.170769	0.127023	0.723584	0.69896	0.805393	0.772994	0.934037	0.922575	1.2064	1.21522	1.32426	1.37201	0.737394	0.71714	0.719663	0.702479	0.899779	0.904808	0.925635	0.943742	0.902731	0.900294	0.923948	0.922545	0.769722	0.743866	1.04713	1.05726
421	COX10-AS1	COX10-AS1	ASO_G0236088_10	Targeted lncRNA	r6b5p5	0.389515	0.51367	0.684189	0.813479	0.827696	0.868568	0.945648	0.968845	1.15237	1.117	1.25725	1.22086	0.733379	0.827704	0.717528	0.81621	0.895668	0.961042	0.934031	0.982755	0.887428	0.937541	0.911754	0.94977	0.739251	0.817733	1.03472	1.03647
422	MIATNB	CTA-211A9.5	ASO_G0244625_02	Targeted lncRNA	r7b6p2	0.989364	1.04061	0.990303	1.03638	0.963847	0.994138	0.994716	0.996502	1.02426	0.974628	1.01693	0.982915	0.97716	1.02153	0.979237	1.02473	1.02269	1.02509	1.01496	1.01659	1.01068	1.03284	1.00873	1.0347	0.979598	1.02918	0.998916	0.997257
423	MIATNB	CTA-211A9.5	ASO_G0244625_04	Targeted lncRNA	r7b6p2	0.585213	0.787066	0.967019	0.897319	0.876029	0.901195	0.975885	0.968604	1.06022	1.04679	1.09576	1.09947	0.896425	0.892652	0.889022	0.886222	1.01978	0.989919	1.01608	0.99451	1.0233	0.983548	1.03359	0.996203	0.931237	0.905123	1.01044	1.01082
424	MIATNB	CTA-211A9.5	ASO_G0244625_06	Targeted lncRNA	r7b6p2	0.84998	0.983525	0.967551	1.07185	0.953065	0.981044	0.994518	0.995092	1.01532	0.985668	1.0451	0.985922	0.9587	1.02844	0.946859	1.02725	1.00739	1.036	1.00546	1.02448	1.00318	1.07025	1.00373	1.07257	0.947852	1.04805	0.999157	0.992314
425	MIATNB	CTA-211A9.5	ASO_G0244625_08	Targeted lncRNA	r7b6p2	0.848293	0.924041	0.953304	1.02003	1.00358	1.002	0.999816	1.01047	0.985726	1.00652	1.0298	0.996177	0.981474	1.01577	0.970941	1.01406	0.982054	1.00938	0.988703	1.01474	0.972085	0.991557	0.971773	0.990493	0.961035	1.00439	1.00055	1.00396
426	MIATNB	CTA-211A9.5	ASO_G0244625_09	Targeted lncRNA	r7b6p2	0.784724	0.858329	0.970216	0.944703	1.00231	0.978781	0.984399	0.988842	1.00773	1.0268	1.04035	1.0676	0.979919	0.974656	0.965226	0.974149	0.972015	0.98301	0.9785	0.998901	0.988088	0.951769	0.989442	0.955483	0.968882	0.954668	0.996509	1.02371
427	MIATNB	CTA-211A9.5	ASO_G0244625_AD_05	Targeted lncRNA	r12b2ADp3	1.05917	0.994111	0.985062	1.07614	1.01451	1.01598	1.00425	1.01193	0.973265	1.01483	1.01072	1.03858	1.00362	1.04647	0.998674	1.03818	0.98708	1.03117	0.98502	1.03232	0.992386	1.00765	0.99181	1.00213	1.00183	1.01726	1.00182	1.01673
428	MIATNB	CTA-211A9.5	ASO_G0244625_AD_07	Targeted lncRNA	r12b2ADp3	0.806968	0.814379	1.0213	1.12017	1.0566	1.03253	1.00553	1.00828	0.950601	0.9573	0.959098	0.970507	1.03292	1.08227	1.02043	1.07921	0.988019	1.03015	0.972747	1.02012	1.04058	1.06276	1.02684	1.05096	1.02994	1.07717	0.97445	0.986768
429	MIATNB	CTA-211A9.5	ASO_G0244625_AD_08	Targeted lncRNA	r12b2ADp3	0.909279	0.919009	0.985089	1.01341	1.02875	1.01308	1.01634	1.00577	0.980367	1.0109	1.0001	1.04736	1.02283	1.03408	1.01963	1.02581	0.974195	1.0076	0.982697	1.02082	0.989214	0.998279	0.982575	0.994436	1.00928	0.996314	1.00152	1.01207
430	MIATNB	CTA-211A9.5	ASO_G0244625_AD_09	Targeted lncRNA	r12b2ADp3	0.894797	0.909994	1.08033	0.963818	1.00988	0.996719	1.00771	0.999926	0.979117	1.00208	0.997177	1.04419	1.06688	0.995509	1.06772	0.993407	1.06215	0.992444	1.03402	0.995368	1.03609	0.973861	1.02934	0.974953	1.062	0.979664	1.00018	1.0154
431	MIATNB	CTA-211A9.5	ASO_G0244625_AD_10	Targeted lncRNA	r12b2ADp3	0.860096	0.864172	1.03622	0.979498	1.03024	0.983028	0.995962	1.00773	0.963445	1.00049	1.01672	1.0418	1.04057	0.993591	1.03506	0.988391	1.02059	0.99698	1.00553	0.996721	1.01484	0.982966	1.00481	0.981381	1.01724	0.979183	0.997544	1.0106
432	NUP50-DT	CTA-217C2.1	ASO_G0226328_02	Targeted lncRNA	r4b4p3	1.05977	1.13061	1.00179	1.05384	1.01019	1.05242	1.00016	1.0077	0.993459	0.970971	0.978672	0.964883	1.0116	1.06606	1.01723	1.06112	1.00086	1.0085	1.00115	1.01701	1.00827	1.01744	0.999738	1.00948	1.00649	1.04756	0.988118	0.994131
433	NUP50-DT	CTA-217C2.1	ASO_G0226328_03	Targeted lncRNA	r4b4p3	1.01498	1.04014	0.986492	1.09952	0.993304	1.01555	0.991853	1.00528	0.965129	0.979693	0.952748	0.964676	0.973766	1.04882	0.975562	1.0551	1.00132	1.0474	0.990273	1.03889	1.03303	1.04822	1.03054	1.05104	1.00143	1.05694	0.976677	0.998243
434	NUP50-DT	CTA-217C2.1	ASO_G0226328_04	Targeted lncRNA	r4b4p3	0.946603	0.874688	1.04039	1.07914	1.04767	0.97571	0.997663	0.990276	0.979815	1.01094	1.0185	0.991253	1.04427	1.0251	1.03998	1.03337	1.01509	1.05224	1.01496	1.05171	1.02689	1.05794	1.03358	1.06233	1.02628	1.03997	0.996941	0.999551
435	NUP50-DT	CTA-217C2.1	ASO_G0226328_07	Targeted lncRNA	r4b4p3	1.02199	0.982567	1.01097	1.07365	1.03589	1.00884	0.997953	1.00415	0.970217	0.995442	0.99969	0.977699	1.02634	1.03891	1.01744	1.03479	0.999537	1.02927	0.996903	1.02768	1.03235	1.0517	1.02648	1.05031	1.02632	1.04878	0.989483	0.992261
436	NUP50-DT	CTA-217C2.1	ASO_G0226328_10	Targeted lncRNA	r4b4p3	0.957145	0.990021	0.917813	1.04089	1.02288	1.02026	1.01399	1.00016	1.00032	0.98984	1.06878	0.9504	0.987788	1.03554	0.987236	1.0386	0.968449	1.01258	0.992053	0.997199	0.91289	1.02928	0.917184	1.03638	0.926564	1.05519	1.03396	0.981578
437	CTB-31O20.2	CTB-31O20.2	ASO_G0261526_01	Targeted lncRNA	r9b8p2	0.996407	0.985944	1.00095	0.973604	1.03823	0.995887	0.99462	0.996421	0.967007	1.00048	0.93254	1.00443	1.01568	0.984075	1.02013	0.983435	0.994233	0.994181	0.972134	0.998025	1.0435	0.977594	1.038	0.979667	1.04767	0.980376	0.958705	0.996767
438	CTB-31O20.2	CTB-31O20.2	ASO_G0261526_02	Targeted lncRNA	r9b8p2	1.01989	0.930514	0.980155	0.999181	1.03564	1.04306	1.0055	1.00309	0.979377	0.991643	0.98193	0.988195	0.99487	1.02925	0.995575	1.02542	0.98003	0.984534	0.965583	0.980973	0.978054	0.98534	0.979036	0.987498	0.99135	1.0109	0.990365	0.998529
439	CTB-31O20.2	CTB-31O20.2	ASO_G0261526_03	Targeted lncRNA	r9b8p2	0.959366	0.877886	1.05605	0.957892	1.06423	1.00574	1.00903	0.995738	0.947079	1.01487	0.950436	1.00179	1.06203	0.979649	1.05956	0.974567	0.986148	0.976257	0.979149	0.980599	1.01616	0.977297	1.00795	0.975741	1.06336	0.973158	0.982615	0.995373
440	CTB-31O20.2	CTB-31O20.2	ASO_G0261526_06	Targeted lncRNA	r9b8p2	1.01965	0.839153	1.00196	1.01649	1.0631	1.01911	1.01619	1.00434	0.951699	1.00453	0.943877	1.00732	1.0375	1.02375	1.03581	1.01781	0.994202	0.989317	0.981194	0.994101	0.987821	0.985472	0.978912	0.984976	1.0181	1.00111	0.977263	1.00204
441	CTB-31O20.2	CTB-31O20.2	ASO_G0261526_08	Targeted lncRNA	r9b8p2	1.03989	0.939895	1.06306	1.02165	0.993593	1.03001	1.00074	1.00765	0.994956	0.998771	1.00298	0.987834	1.03443	1.03418	1.03073	1.03635	1.0341	1.00338	1.03016	1.00244	1.03445	0.993587	1.02776	0.988348	1.03262	1.02235	0.995327	0.99507
442	CTB-55O6.12	CTB-55O6.12	ASO_G0267169_03	Targeted lncRNA	r15bALLp4	0.97679	0.934761	1.05834	0.975627	1.0399	0.987786	0.999142	0.988091	0.991564	1.00721	0.983124	1.03116	1.05623	0.984014	1.05524	0.987753	1.02006	1.00484	1.00892	1.00851	1.02834	0.995314	1.02563	1.00277	1.05323	0.98052	0.996877	1.01427
443	CTB-55O6.12	CTB-55O6.12	ASO_G0267169_04	Targeted lncRNA	r15bALLp4	1.07339	1.02383	1.06968	1.08812	1.07252	1.0414	1.00962	1.00808	0.969454	1.01933	0.952564	0.989856	1.07827	1.07179	1.07962	1.06725	1.01322	1.01833	1.00039	1.01508	1.01815	1.00364	1.00777	0.996834	1.06869	1.04969	0.987891	1.00216
444	CTB-55O6.12	CTB-55O6.12	ASO_G0267169_05	Targeted lncRNA	r15bALLp4	1.00567	0.857303	0.971185	1.02358	1.02194	1.00047	0.99853	0.989204	1.02584	1.01377	1.00046	1.00153	0.999343	1.00515	0.994946	1.00658	0.986657	1.00255	0.982811	1.00397	0.990153	1.02493	0.984521	1.0232	0.987948	1.01649	0.992189	0.994034
445	CTB-55O6.12	CTB-55O6.12	ASO_G0267169_07	Targeted lncRNA	r15bALLp4	1.09436	1.01629	1.0193	1.05173	0.996023	1.0327	0.987992	0.999931	1.00811	1.00617	1.02044	0.981882	1.00974	1.04586	1.01232	1.05064	1.03048	1.02654	1.01869	1.01131	1.00717	1.02014	1.00679	1.01288	1.00363	1.03934	1.00815	0.986067
446	CTB-55O6.12	CTB-55O6.12	ASO_G0267169_10	Targeted lncRNA	r15bALLp4	0.90573	1.0307	1.04075	0.972767	1.02383	1.00842	1.00103	0.991896	0.973367	1.01131	0.969426	1.00977	1.02651	0.990584	1.02375	0.985776	1.00436	0.984326	0.999558	0.980847	1.01104	0.996498	1.01148	0.993661	1.02824	0.987943	0.991663	0.991215
447	LINC01184	CTC-228N24.3	ASO_G0245937_01	Targeted lncRNA	r7b6p4	0.960901	1.00655	0.939019	0.968841	1.00039	1.01824	0.995876	0.999729	0.994503	0.990304	1.00309	0.992081	0.974358	0.995809	0.969005	0.987147	0.972101	0.987151	0.97114	0.980361	1.00233	1.01895	0.993128	1.00903	0.981419	1.0032	0.980206	0.9801
448	LINC01184	CTC-228N24.3	ASO_G0245937_02	Targeted lncRNA	r7b6p4	1.00527	0.924916	1.03313	0.991751	0.993598	0.973811	0.98569	0.986325	0.973128	1.03944	0.975752	1.01041	0.995551	0.976165	0.996043	0.971533	1.02162	1.00777	0.996906	0.991307	1.06118	1.06338	1.04365	1.0548	1.01686	1.00795	0.968636	0.97883
449	LINC01184	CTC-228N24.3	ASO_G0245937_04	Targeted lncRNA	r7b6p4	0.86064	0.837433	0.911741	0.994987	0.957087	0.942553	0.972311	0.973639	1.02014	1.06073	1.02995	1.07655	0.926766	0.955838	0.921441	0.944086	0.98387	1.02088	0.980195	1.01327	1.03074	1.05275	1.02217	1.06532	0.943466	0.976645	0.967176	1.00277
450	LINC01184	CTC-228N24.3	ASO_G0245937_05	Targeted lncRNA	r7b6p4	0.943131	0.780724	0.953108	0.910113	0.972835	0.947413	0.984685	0.980461	1.01584	1.03344	1.01896	1.0545	0.956241	0.923269	0.949349	0.919187	0.985273	0.985535	0.978799	0.987974	1.01551	1.00489	1.01578	1.00911	0.972358	0.934619	0.983439	1.00107
451	LINC01184	CTC-228N24.3	ASO_G0245937_07	Targeted lncRNA	r7b6p4	0.929492	0.885871	0.959918	1.01076	0.946243	0.923475	0.982751	0.987713	1.03324	1.06395	1.01359	1.08689	0.941553	0.959621	0.939353	0.953522	1.00538	1.02621	1.00208	1.03904	1.03269	1.02809	1.04155	1.0345	0.966741	0.964964	0.985964	1.02076
452	LINC01184	CTC-228N24.3	ASO_G0245937_AD_02	Targeted lncRNA	r14b9plusp6	1.02834	1.02418	0.997291	1.00496	1.03009	1.01812	1.00382	1.00737	0.979039	1.00262	0.98364	1.0109	1.01959	1.01415	1.02184	1.01358	0.982486	0.981344	0.985526	0.991376	0.983724	0.995842	0.982578	0.995595	1.00765	1.01189	0.992422	1.00224
453	LINC01184	CTC-228N24.3	ASO_G0245937_AD_03	Targeted lncRNA	r14b9plusp6	0.914778	0.970074	0.953548	1.00594	1.02912	0.97404	1.00443	0.993419	1.01927	0.99722	1.05837	1.00907	1.00161	0.989518	0.990329	0.989438	0.973923	0.99819	0.994041	0.997103	0.952751	1.02135	0.949339	1.01673	0.957459	0.999292	1.02136	0.995029
454	LINC01184	CTC-228N24.3	ASO_G0245937_AD_05	Targeted lncRNA	r14b9plusp6	0.882497	0.899257	0.917191	0.847443	1.13981	1.09064	1.02678	1.01794	0.943136	0.987143	1.03577	1.05843	1.04815	0.982307	1.03089	0.961769	0.919564	0.885813	0.958826	0.926472	0.899208	0.872994	0.895573	0.874454	0.957106	0.908303	1.03439	1.03068
455	LINC01184	CTC-228N24.3	ASO_G0245937_AD_07	Targeted lncRNA	r14b9plusp6	0.869955	0.886805	1.0257	1.01439	1.0798	0.979851	1.01184	0.995715	0.980559	0.996304	0.967665	0.999702	1.06495	0.986725	1.05922	0.985974	0.987385	0.996537	0.995009	1.00132	0.989492	1.0292	0.98215	1.0207	1.02935	0.997372	0.990267	0.989886
456	LINC01184	CTC-228N24.3	ASO_G0245937_AD_09	Targeted lncRNA	r14b9plusp6	0.63058	0.666733	0.867543	0.843225	0.940211	0.942753	0.992861	0.991102	1.07888	1.04362	1.14196	1.1051	0.906492	0.896812	0.90067	0.890321	0.968667	0.967776	0.988522	0.979206	0.925006	0.930087	0.928034	0.93501	0.884629	0.876219	1.03327	1.02449
457	TMEM220-AS1	CTC-297N7.5	ASO_G0263400_03	Targeted lncRNA	r9b8p2	0.2211	0.261196	0.753744	0.794567	0.845205	0.879609	0.927137	0.947942	1.15569	1.09904	1.20832	1.15378	0.764217	0.806975	0.753505	0.797036	0.916402	0.927907	0.932572	0.937901	0.909524	0.925341	0.936357	0.937552	0.811344	0.839869	1.0225	1.0052
458	TMEM220-AS1	CTC-297N7.5	ASO_G0263400_04	Targeted lncRNA	r9b8p2	0.91286	0.913264	1.16064	1.06363	1.10196	1.06325	1.01399	1.01022	0.923037	0.932495	0.845754	0.884307	1.11822	1.07263	1.12529	1.07455	1.00825	0.983359	0.971617	0.965667	1.06124	1.03364	1.0413	1.00838	1.15074	1.08335	0.937382	0.949299
459	TMEM220-AS1	CTC-297N7.5	ASO_G0263400_06	Targeted lncRNA	r9b8p2	0.825509	0.858726	1.02713	1.0443	1.03034	1.05239	1.00613	0.998554	1.00418	0.970337	0.991628	0.964187	1.02813	1.05018	1.02019	1.04229	0.983605	1.01377	0.990495	1.00501	1.01371	1.03352	1.01941	1.02887	1.02947	1.04602	0.996629	0.974672
460	TMEM220-AS1	CTC-297N7.5	ASO_G0263400_09	Targeted lncRNA	r9b8p2	0.801224	0.8657	1.04573	1.04873	1.06559	1.0182	1.00645	1.00141	0.979767	0.993035	0.971042	0.998718	1.05306	1.02252	1.04511	1.01633	0.999576	1.00828	0.99002	1.00276	1.01084	1.02926	1.00764	1.02568	1.04061	1.02456	0.985076	0.991148
461	TMEM220-AS1	CTC-297N7.5	ASO_G0263400_10	Targeted lncRNA	r9b8p2	0.862548	0.899465	0.935752	1.02629	1.01026	0.992635	0.996526	0.989222	1.0001	1.01481	1.02225	1.01032	0.976007	1.00651	0.967564	1.00171	0.957841	1.0081	0.973361	0.996709	0.975845	1.05008	0.973178	1.04551	0.96185	1.02628	0.99643	0.978415
462	CTC-338M12.4	CTC-338M12.4	ASO_G0233937_01	Targeted lncRNA	r6b5p3	0.884454	0.790575	1.00302	1.08841	1.11559	1.064	1.01028	1.01342	0.917441	0.959723	0.917418	0.966787	1.06293	1.08616	1.05735	1.08462	0.946697	1.02072	0.947996	1.00528	0.981676	1.01855	0.968515	1.00214	1.03875	1.06509	0.961002	0.984405
463	CTC-338M12.4	CTC-338M12.4	ASO_G0233937_02	Targeted lncRNA	r6b5p3	0.675382	0.731175	0.901283	1.06402	1.01313	1.02953	1.00417	0.995156	1.00493	0.982143	1.01637	1.01416	0.944995	1.02368	0.932612	1.01226	0.910948	1.00075	0.93099	0.984402	0.96811	1.05496	0.946434	1.05006	0.93866	1.03295	0.975222	0.989429
464	CTC-338M12.4	CTC-338M12.4	ASO_G0233937_04	Targeted lncRNA	r6b5p3	0.932277	0.81385	1.05767	0.956748	1.05928	0.997819	1.01206	0.993406	0.963762	1.00827	0.93434	1.05422	1.06939	0.974862	1.05875	0.955475	1.00512	0.989001	0.99042	0.995487	1.03747	0.99736	1.00533	0.991263	1.05514	0.947202	0.969999	0.995359
465	CTC-338M12.4	CTC-338M12.4	ASO_G0233937_05	Targeted lncRNA	r6b5p3	0.821634	0.815034	0.969402	1.03254	1.03776	1.00276	0.991957	1.00636	0.974051	0.990567	0.987307	1.01831	1.00626	1.02207	0.988311	1.0185	0.951666	1.01127	0.947686	1.01785	1.00663	1.00435	0.987846	1.00417	1.00489	1.00809	0.960804	1.00447
466	CTC-338M12.4	CTC-338M12.4	ASO_G0233937_10	Targeted lncRNA	r6b5p3	0.864253	0.891091	0.94618	0.949549	0.972469	0.92793	0.994455	0.990168	0.987242	1.03989	0.986184	1.06723	0.943191	0.935686	0.941401	0.936311	0.976794	1.01371	0.966443	1.0135	1.01402	0.992971	1.00764	1.00045	0.96932	0.940685	0.976926	1.00957
467	CTC-338M12.4	CTC-338M12.4	ASO_G0233937_AD_03	Targeted lncRNA	r13b3ADp3	1.05255	0.976512	0.850763	0.940353	0.963666	1.0084	0.99045	1.00385	1.02805	0.961072	1.07168	0.98442	0.907562	0.986695	0.902185	0.98536	0.94475	0.980448	0.961104	0.971096	0.934716	0.96287	0.949413	0.960249	0.897829	0.977145	1.01432	0.993689
468	CTC-338M12.4	CTC-338M12.4	ASO_G0233937_AD_05	Targeted lncRNA	r13b3ADp3	1.01499	1.06	0.949136	0.960102	0.92771	0.963519	0.989	0.993568	1.04246	1.01277	1.08582	1.04826	0.937382	0.963583	0.933427	0.964725	0.99952	1.01671	1.00738	1.02072	0.997105	0.996112	1.00006	1.00035	0.940991	0.953271	1.017	1.01234
469	CTC-338M12.4	CTC-338M12.4	ASO_G0233937_AD_08	Targeted lncRNA	r13b3ADp3	0.912543	1.00343	0.931196	1.03784	0.952827	1.05574	0.994164	1.01004	1.03106	0.989448	1.05208	0.964414	0.947525	1.04918	0.945111	1.04956	0.980297	0.984696	0.988099	0.983809	0.974275	0.980948	0.978257	0.979309	0.94473	1.04663	1.01009	0.999099
470	CTC-338M12.4	CTC-338M12.4	ASO_G0233937_AD_09	Targeted lncRNA	r13b3ADp3	0.967706	1.06311	0.92296	0.982718	1.00385	1.01759	0.992132	1.00244	1.01516	0.977472	1.01228	1.00399	0.964737	1.00008	0.959741	1.00298	0.951662	0.994336	0.959881	0.990184	0.971067	0.982421	0.976969	0.986816	0.970001	0.99605	0.991343	1.004
471	CTC-338M12.4	CTC-338M12.4	ASO_G0233937_AD_10	Targeted lncRNA	r13b3ADp3	0.852213	0.844389	0.856017	0.898959	0.970596	0.958318	0.991913	0.991736	1.0249	1.05419	1.07248	1.09658	0.913557	0.927375	0.908107	0.921959	0.949737	0.973854	0.962521	0.993527	0.925191	0.950357	0.925709	0.964795	0.899227	0.912367	1.00902	1.02151
472	CTC-338M12.5	CTC-338M12.5	ASO_G0250222_01	Targeted lncRNA	r8b7p2	0.167922	0.157839	0.773128	0.752526	0.914889	0.897128	0.953487	0.957724	1.10702	1.10082	1.21924	1.203	0.840309	0.813631	0.822449	0.799042	0.922755	0.92317	0.952243	0.946925	0.909139	0.913405	0.924089	0.934063	0.821626	0.807859	1.02966	1.02613
473	CTC-338M12.5	CTC-338M12.5	ASO_G0250222_02	Targeted lncRNA	r8b7p2	0.91846	0.907248	1.08387	1.03312	0.97816	1.01871	0.989338	0.999911	0.99766	0.971606	1.01033	0.958651	1.02052	1.02384	1.0234	1.02524	1.06109	1.00257	1.04064	0.99364	1.07174	1.03513	1.07758	1.03487	1.03357	1.04049	1.0023	0.977647
474	CTC-338M12.5	CTC-338M12.5	ASO_G0250222_03	Targeted lncRNA	r8b7p2	0.812731	0.776975	1.0201	0.968393	0.942659	0.956651	0.987405	0.988549	1.02614	1.02579	1.0438	1.02571	0.968956	0.945453	0.967099	0.943874	1.0139	1.00306	1.01953	1.00225	1.04731	1.02229	1.05762	1.02556	0.987035	0.965372	1.00188	0.992903
475	CTC-338M12.5	CTC-338M12.5	ASO_G0250222_06	Targeted lncRNA	r8b7p2	0.751504	0.771782	0.910222	0.990228	0.927921	0.955701	0.973965	0.987931	1.07344	1.04464	1.09732	1.05438	0.906106	0.967198	0.900006	0.964482	0.998528	1.01507	1.00208	1.02314	0.989149	1.01278	0.999885	1.02442	0.909343	0.966208	1.01721	1.01133
476	CTC-338M12.5	CTC-338M12.5	ASO_G0250222_07	Targeted lncRNA	r8b7p2	0.880273	0.84243	0.953749	0.92501	0.988636	0.97277	0.99388	0.985611	1.04726	1.01077	1.0593	1.04432	0.971859	0.944944	0.965771	0.945202	0.98176	0.985817	1.0069	0.997671	0.966956	0.997239	0.978557	1.00378	0.943346	0.94351	1.01722	1.0024
477	CTC-338M12.5	CTC-338M12.5	ASO_G0250222_AD_02	Targeted lncRNA	r13b3ADp5	1.06492	1.01138	1.03881	1.11046	0.984077	0.984226	1.00545	0.999473	0.984348	1.01605	0.98372	1.00071	1.00985	1.03957	1.01492	1.04547	1.0246	1.04943	1.01551	1.04448	1.02592	1.04091	1.01135	1.03488	1.01482	1.04002	0.992671	1.00952
478	CTC-338M12.5	CTC-338M12.5	ASO_G0250222_AD_05	Targeted lncRNA	r13b3ADp5	1.01381	0.996528	0.926899	1.01942	1.02195	0.975399	1.00819	1.0033	1.00785	1.01285	1.00964	0.99438	0.985359	0.994988	0.980509	0.998543	0.969968	1.00621	0.977164	1.00822	0.950467	0.998731	0.949365	0.999579	0.962258	0.997674	1.00744	1.00538
479	CTC-338M12.5	CTC-338M12.5	ASO_G0250222_AD_06	Targeted lncRNA	r13b3ADp5	0.899505	0.997963	0.951494	1.08848	1.03928	1.03849	1.01069	1.01387	1.01511	0.96931	1.00741	0.961864	1.00097	1.07237	0.984758	1.07348	0.967229	1.01299	0.97411	1.01409	0.95621	1.02482	0.95236	1.01513	0.97192	1.05814	0.998902	0.995288
480	CTC-338M12.5	CTC-338M12.5	ASO_G0250222_AD_07	Targeted lncRNA	r13b3ADp5	0.882296	0.969349	0.930682	0.952666	1.019	0.989243	1.00802	1.00093	1.01875	1.00184	1.04855	0.993482	0.983171	0.976202	0.96962	0.973139	0.966442	0.993014	0.994765	1.00225	0.931022	0.989892	0.929046	0.986851	0.933666	0.973801	1.02096	0.997217
481	CTC-338M12.5	CTC-338M12.5	ASO_G0250222_AD_10	Targeted lncRNA	r13b3ADp5	0.947742	0.941465	0.983988	1.06326	0.985639	0.973992	1.00046	0.99267	1.02527	1.01722	1.04252	0.991859	0.990016	1.01154	0.98369	1.01545	1.01563	1.0443	1.01505	1.02619	0.974212	1.03788	0.974756	1.03896	0.969568	1.02773	1.0207	1.0013
482	CTC-459F4.3	CTC-459F4.3	ASO_G0267575_01	Targeted lncRNA	r9b8p5	0.947545	0.971527	0.891411	1.03656	0.973119	0.922167	0.993207	0.981111	0.997533	1.02713	1.02598	1.00669	0.933755	0.963164	0.944697	0.973039	0.96176	1.0336	0.963351	1.02131	0.962865	1.04338	0.964228	1.05471	0.941907	1.01587	0.994677	1.0001
483	CTC-459F4.3	CTC-459F4.3	ASO_G0267575_02	Targeted lncRNA	r9b8p5	1.05567	0.933142	0.947024	0.957788	1.00816	0.945469	0.99994	0.98557	0.985366	1.03387	1.00146	1.09042	0.981303	0.9464	0.977838	0.948522	0.970367	1.00436	0.971044	1.00479	0.9883	0.98321	0.98554	0.990113	0.979819	0.958144	0.982983	1.01866
484	CTC-459F4.3	CTC-459F4.3	ASO_G0267575_03	Targeted lncRNA	r9b8p5	1.00757	0.861839	0.917601	0.941885	0.980863	0.909064	0.98929	0.973456	0.984061	1.03608	1.00558	1.08269	0.942569	0.907969	0.944282	0.90755	0.968062	0.993601	0.962434	0.992425	0.970524	1.00554	0.973732	1.01768	0.945538	0.933785	0.982402	1.00665
485	CTC-459F4.3	CTC-459F4.3	ASO_G0267575_04	Targeted lncRNA	r9b8p5	1.01698	0.892625	0.953111	0.942756	1.01398	0.978097	0.99591	0.988785	0.981152	1.01398	0.988243	1.04355	0.980385	0.961018	0.979048	0.955598	0.989289	0.965986	0.980706	0.97593	1.00784	1.00132	0.991169	1.01169	0.983768	0.968119	0.974012	1.00014
486	ZNF56	CTC-559E9.6	ASO_G0267419_02	Targeted lncRNA	r9b8p4	0.94042	0.940089	0.974271	0.982233	0.94327	0.932963	1.00153	0.97697	1.0035	1.02364	1.00387	1.02475	0.954435	0.948251	0.963064	0.955324	1.02272	1.01638	1.01728	1.01128	1.00842	1.02801	1.01428	1.03787	0.977493	0.988244	1.00649	1.00042
487	ZNF56	CTC-559E9.6	ASO_G0267419_03	Targeted lncRNA	r9b8p4	0.889541	0.95114	1.04522	1.08803	1.09697	1.04035	1.01462	1.00325	1.0048	1.00547	0.979658	0.993436	1.08223	1.05909	1.06306	1.05716	0.987248	1.02771	0.985154	1.01508	0.984475	1.03077	0.979885	1.02736	1.03689	1.04886	0.985917	0.995186
488	ZNF56	CTC-559E9.6	ASO_G0267419_04	Targeted lncRNA	r9b8p4	0.870448	0.989046	1.01399	1.09873	1.02901	1.03267	1.0045	1.00765	1.0113	1.00881	1.02326	0.980027	1.00602	1.05885	0.999787	1.05712	0.996009	1.01679	0.999654	1.01452	0.982073	1.02557	0.989106	1.02713	0.995028	1.06536	1.0094	1.00132
489	ZNF56	CTC-559E9.6	ASO_G0267419_05	Targeted lncRNA	r9b8p4	0.87364	0.90635	0.964669	0.980553	1.00877	1.0031	0.997676	1.00238	1.01931	1.02075	1.01675	1.03412	0.974469	0.994661	0.966436	0.990073	0.984065	0.97097	0.986045	0.98679	0.966748	0.946534	0.973525	0.960041	0.965644	0.982248	1.00143	1.02032
490	ZNF56	CTC-559E9.6	ASO_G0267419_08	Targeted lncRNA	r9b8p4	0.887097	0.997641	1.00777	1.06215	0.996102	1.02702	0.995583	1.00516	1.02478	1.01415	1.0055	0.978102	0.991312	1.03274	0.984591	1.0302	0.985275	1.01489	0.990908	1.01665	1.01371	1.00624	1.01185	1.00509	1.00694	1.02481	0.994039	0.997869
491	ZNF56	CTC-559E9.6	ASO_G0267419_AD_03	Targeted lncRNA	r12b2ADp5	1.08159	1.02527	0.901396	0.949072	1.0306	1.00432	1.00035	0.987827	0.978805	0.979349	1.01145	0.974323	0.976521	0.975516	0.968001	0.978027	0.950311	0.983799	0.957941	0.97799	0.965879	0.997277	0.964078	0.997211	0.958544	0.98065	0.984583	0.983994
492	ZNF56	CTC-559E9.6	ASO_G0267419_AD_04	Targeted lncRNA	r12b2ADp5	0.930962	0.875478	0.96296	0.919441	0.908286	0.932531	0.966027	0.984381	1.03553	1.02065	1.07528	1.06458	0.918307	0.92289	0.920114	0.927582	1.04205	1.0048	1.02374	1.0056	1.04421	0.985538	1.04734	0.996302	0.942023	0.931561	0.999609	1.01192
493	ZNF56	CTC-559E9.6	ASO_G0267419_AD_05	Targeted lncRNA	r12b2ADp5	0.990629	1.0026	0.953198	0.991518	1.0442	0.975952	1.0073	0.988718	0.958342	1.00626	1.00663	1.01146	1.00946	0.976173	1.00731	0.98071	0.979615	1.00253	0.979772	1.00382	0.952249	1.01293	0.952325	1.01465	0.971941	0.990083	1.00177	0.998884
494	ZNF56	CTC-559E9.6	ASO_G0267419_AD_06	Targeted lncRNA	r12b2ADp5	0.900162	0.955956	1.01466	0.915552	0.999872	0.976535	1.00509	0.993302	0.982062	1.01551	1.0145	1.01723	1.0145	0.951206	1.01485	0.952401	1.00158	0.973977	1.00541	0.987469	0.968288	0.967692	0.978279	0.965929	0.995072	0.939876	1.01555	1.00066
495	ZNF56	CTC-559E9.6	ASO_G0267419_AD_08	Targeted lncRNA	r12b2ADp5	0.870171	1.01706	1.00727	1.01052	1.03019	1.0579	1.01018	1.01174	1.00689	0.973968	1.00093	0.956363	1.03208	1.03937	1.02706	1.03716	0.991681	0.992267	0.999372	0.998272	0.973478	0.975242	0.969388	0.969959	1.00063	1.0094	1.00742	0.990416
496	ZNF433-AS1	CTD-2006C1.2	ASO_G0219665_01	Targeted lncRNA	r4b4p1	0.947719	0.974808	1.00436	0.972427	0.944172	1.00011	0.99427	0.99347	1.02229	1.03486	1.05511	1.05399	0.981579	0.984337	0.984585	0.980245	1.0248	1.00429	1.03542	1.00901	1.01334	0.990466	1.0164	0.994855	0.983238	0.972826	1.01915	1.00625
497	ZNF433-AS1	CTD-2006C1.2	ASO_G0219665_02	Targeted lncRNA	r4b4p1	0.979207	1.00234	0.975149	0.951276	0.930461	0.937411	0.985468	0.977817	1.08705	1.02662	1.10903	1.03465	0.946435	0.934074	0.943061	0.936961	1.01994	1.00922	1.03112	0.999409	0.974159	1.01494	0.988719	1.02155	0.934617	0.960429	1.03862	1.00163
498	ZNF433-AS1	CTD-2006C1.2	ASO_G0219665_06	Targeted lncRNA	r4b4p1	0.988708	1.05851	1.04706	1.02925	0.981042	0.975242	0.996712	0.992676	1.03633	1.02096	1.04557	1.06563	1.00741	0.983279	1.00247	0.984088	1.02727	1.02782	1.0224	1.02555	1.01527	1.01074	1.01321	1.01567	1.01197	0.98555	1.01182	1.02252
499	ZNF433-AS1	CTD-2006C1.2	ASO_G0219665_07	Targeted lncRNA	r4b4p1	0.578281	0.612075	0.793339	0.956927	0.875048	0.918799	0.954922	0.978388	1.13164	1.05193	1.25085	1.08447	0.807635	0.928158	0.805903	0.932773	0.977355	1.03893	0.994806	1.03842	0.903806	1.00473	0.930433	1.01878	0.802667	0.938278	1.06217	1.01887
500	ZNF433-AS1	CTD-2006C1.2	ASO_G0219665_08	Targeted lncRNA	r4b4p1	0.732991	0.785168	0.932271	0.909116	0.973003	0.977576	0.989907	0.993245	1.09813	1.08526	1.1791	1.14279	0.967341	0.948523	0.954466	0.932286	0.999732	0.961305	1.02682	0.988911	0.906151	0.92626	0.921415	0.937395	0.906519	0.912868	1.06008	1.04685
501	ZNF433-AS1	CTD-2006C1.2	ASO_G0219665_AD_02	Targeted lncRNA	r12b2ADp1	0.648063	0.641111	0.948655	0.912532	1.0026	0.995732	0.980979	0.975584	0.996627	1.0235	0.994053	1.02898	0.969063	0.946047	0.961249	0.934997	0.972406	0.962583	0.954131	0.955952	1.01532	0.996395	1.00866	0.992591	0.993589	0.964613	0.970191	0.972737
502	ZNF433-AS1	CTD-2006C1.2	ASO_G0219665_AD_03	Targeted lncRNA	r12b2ADp1	0.952596	0.935483	1.07199	1.03291	1.03386	1.07185	1.00131	1.00977	0.977923	0.97897	0.989479	0.982038	1.04841	1.06302	1.04469	1.05987	1.01548	1.0061	1.00058	1.00137	1.05009	0.98979	1.04449	0.990293	1.05501	1.03415	0.992712	1.00038
503	ZNF433-AS1	CTD-2006C1.2	ASO_G0219665_AD_04	Targeted lncRNA	r12b2ADp1	0.642449	0.619388	0.982232	0.964863	1.07208	1.11468	1.00541	1.01106	1.00725	0.984357	1.02122	1.00248	1.03269	1.05611	1.01399	1.03682	0.9557	0.951662	0.972372	0.969992	0.954458	0.941507	0.948876	0.938126	0.9977	0.994725	1.00484	0.99784
504	ZNF433-AS1	CTD-2006C1.2	ASO_G0219665_AD_05	Targeted lncRNA	r12b2ADp1	0.719277	0.751462	0.943218	0.942074	1.04309	1.04312	0.999995	0.995568	0.995489	0.993946	1.02721	1.01455	0.982846	0.989268	0.962841	0.9762	0.946007	0.954404	0.957446	0.954687	0.973701	0.98256	0.974476	0.983766	0.963387	0.973398	0.992148	0.990733
505	ZNF433-AS1	CTD-2006C1.2	ASO_G0219665_AD_08	Targeted lncRNA	r12b2ADp1	0.854286	0.839653	1.02736	1.00188	1.07805	1.07126	1.01272	1.01006	0.950731	0.989815	0.968204	0.969991	1.06123	1.04025	1.05029	1.03361	0.989333	0.97907	0.995331	0.980885	0.994237	0.957279	0.984122	0.953356	1.03109	1.00538	0.991319	0.996091
506	CTD-2015H6.3	CTD-2015H6.3	ASO_G0249042_01	Targeted lncRNA	r8b7p6	0.944902	1.00623	1.00531	1.10409	0.987246	1.07108	0.997101	1.01151	1.01058	0.946763	1.01582	0.911155	0.985954	1.0872	0.984048	1.08858	0.99542	1.01492	0.99335	1.00058	1.00533	1.0332	1.00453	1.01788	0.999762	1.09012	1.00237	0.968909
507	CTD-2015H6.3	CTD-2015H6.3	ASO_G0249042_02	Targeted lncRNA	r8b7p6	0.982355	0.931149	1.11873	1.01413	1.02717	1.08997	1.00742	1.01287	0.999491	0.965826	0.983316	0.924362	1.06259	1.05386	1.05954	1.05573	1.03706	0.966759	1.03692	0.970113	1.05521	0.97628	1.0474	0.976581	1.05645	1.04424	1.00319	0.983225
508	CTD-2015H6.3	CTD-2015H6.3	ASO_G0249042_03	Targeted lncRNA	r8b7p6	0.845463	0.905607	1.00381	0.99887	0.973739	0.978609	0.997778	0.996331	1.02087	1.04074	1.05088	1.07825	0.988892	0.986991	0.983444	0.985712	1.00265	0.991533	1.0153	1.00374	1.01254	0.977681	1.01488	0.982211	0.982068	0.986189	1.00875	1.01889
509	CTD-2015H6.3	CTD-2015H6.3	ASO_G0249042_08	Targeted lncRNA	r8b7p6	0.823406	0.941486	0.986634	0.948723	0.937188	0.986031	0.982472	1.00346	1.02792	0.974558	1.03914	0.990584	0.952269	0.968619	0.955469	0.96649	1.01152	0.973501	1.01093	0.981078	1.03107	0.989509	1.03622	0.990924	0.982894	0.97237	1.00295	0.992915
510	CTD-2015H6.3	CTD-2015H6.3	ASO_G0249042_09	Targeted lncRNA	r8b7p6	0.979438	0.967122	1.027	1.08483	1.00507	1.01908	1.00742	0.996422	0.965307	1.01636	0.970295	0.956247	1.00835	1.04269	1.0056	1.04544	0.99164	1.02584	0.990002	1.0094	1.01342	1.03941	1.00692	1.03954	1.01778	1.06666	0.983727	0.986953
511	SCAMP1-AS1	CTD-2037K23.2	ASO_G0245556_01	Targeted lncRNA	r7b6p3	0.949692	0.94237	0.957361	0.950108	0.951279	0.976887	0.986356	0.998705	1.03861	1.02225	1.0721	1.04303	0.948171	0.962568	0.944498	0.960039	0.988683	0.983679	0.992049	0.991971	1.00092	0.983824	0.999934	0.982818	0.95711	0.955459	1.01294	1.00797
512	SCAMP1-AS1	CTD-2037K23.2	ASO_G0245556_03	Targeted lncRNA	r7b6p3	0.791423	0.788761	0.997658	0.917205	0.959255	0.950089	0.987116	0.995361	1.03334	1.08187	1.05291	1.11172	0.974531	0.928342	0.975585	0.922795	1.01992	0.974569	1.02068	0.996833	1.00986	0.947984	1.01632	0.957258	0.971442	0.911236	1.00703	1.02897
513	SCAMP1-AS1	CTD-2037K23.2	ASO_G0245556_04	Targeted lncRNA	r7b6p3	0.704801	0.771083	0.961407	0.964527	0.947902	1.00222	0.985943	0.998185	1.06108	1.03046	1.09564	1.04697	0.95383	0.987524	0.949605	0.983443	1.00595	0.994983	1.02599	0.996525	1.00099	0.989939	1.01453	0.98934	0.940915	0.977274	1.02075	1.00631
514	SCAMP1-AS1	CTD-2037K23.2	ASO_G0245556_05	Targeted lncRNA	r7b6p3	0.742693	0.725174	0.986113	0.942299	0.933281	0.904921	0.983462	0.976696	1.06333	1.04967	1.08247	1.08788	0.953342	0.908843	0.953488	0.911912	1.01879	1.00053	1.03135	1.0095	1.02334	1.02749	1.02799	1.03104	0.959573	0.942364	1.01378	1.00753
515	SCAMP1-AS1	CTD-2037K23.2	ASO_G0245556_07	Targeted lncRNA	r7b6p3	0.859153	0.820628	0.90247	0.927905	0.928898	0.997332	0.988047	0.992069	1.05637	1.04601	1.10951	1.04413	0.916733	0.959792	0.912284	0.958093	0.984205	0.96275	1.00138	0.974367	0.960526	0.968424	0.968232	0.977512	0.908836	0.954364	1.02554	1.01236
516	LINC02104	CTD-2078B5.2	ASO_G0271334_02	Targeted lncRNA	r14b9plusp2	0.978898	1.02087	1.00088	0.949862	1.01819	0.961908	1.0014	0.981578	0.969198	1.02913	0.948262	1.05264	1.0005	0.953088	0.999104	0.952286	0.991181	0.991902	0.987653	1.00134	1.01344	0.979192	1.0023	0.986955	1.00689	0.947161	0.982892	1.00954
517	LINC02104	CTD-2078B5.2	ASO_G0271334_05	Targeted lncRNA	r14b9plusp2	0.936055	0.960996	0.929365	0.91997	1.08286	1.03059	1.00852	1.01008	0.962526	1.00907	0.956811	1.05221	1.01936	0.996169	1.01791	0.986135	0.937296	0.961459	0.946779	0.98235	0.944714	0.915838	0.948715	0.920648	0.98798	0.942649	0.99314	1.02713
518	LINC02104	CTD-2078B5.2	ASO_G0271334_07	Targeted lncRNA	r14b9plusp2	0.943385	0.975934	0.984616	0.939119	1.07306	1.03017	1.00888	1.00665	0.988917	1.00693	1.00457	1.05775	1.04607	0.998464	1.03319	0.985524	0.957063	0.96889	0.969175	0.989063	0.953126	0.928354	0.951393	0.93802	1.00834	0.953295	1.007	1.02445
519	LINC02104	CTD-2078B5.2	ASO_G0271334_08	Targeted lncRNA	r14b9plusp2	0.94135	0.9743	0.993911	0.926855	1.01293	0.99205	0.999523	1.00557	0.99647	1.0135	1.0045	1.04016	0.999916	0.972828	0.992697	0.959468	0.99121	0.969018	0.994511	0.982041	1.0043	0.957283	1.00495	0.956332	0.988456	0.946826	0.995721	1.00928
520	LINC02104	CTD-2078B5.2	ASO_G0271334_10	Targeted lncRNA	r14b9plusp2	0.990574	1.01215	0.984781	0.976868	1.0198	0.966123	1.00279	0.991334	0.987965	1.02454	1.00458	1.04952	1.01145	0.97022	1.0073	0.966918	0.975844	0.992537	0.98251	0.996657	0.977722	0.983817	0.972728	0.990519	0.999504	0.969592	1.00389	1.01755
521	ZNF790-AS1	CTD-2162K18.5	ASO_G0267254_02	Targeted lncRNA	r9b8p4	0.926746	0.974569	0.987712	1.00533	1.04802	1.02982	1.00576	1.00612	0.997614	0.987944	0.978862	0.988837	1.01983	1.02317	1.00713	1.02453	0.986476	0.999323	0.977484	1.0013	0.984176	0.997116	0.982366	1.00116	1.00646	0.999544	0.992217	0.99914
522	ZNF790-AS1	CTD-2162K18.5	ASO_G0267254_04	Targeted lncRNA	r9b8p4	0.676244	0.667939	0.874745	0.861447	0.92156	0.875873	0.977407	0.969096	1.08188	1.09008	1.14333	1.17209	0.892083	0.852076	0.887872	0.856572	0.990489	1.0038	1.00051	1.0085	0.949424	0.946734	0.961574	0.960979	0.889812	0.864284	1.0271	1.04282
523	ZNF790-AS1	CTD-2162K18.5	ASO_G0267254_05	Targeted lncRNA	r9b8p4	0.824288	0.811835	1.054	1.07621	1.02543	1.04997	0.995474	1.00022	0.985856	0.980087	0.956717	0.963598	1.02655	1.05096	1.0275	1.05716	1.02232	1.02037	1.00699	1.00769	1.04025	1.01911	1.04099	1.01433	1.04671	1.05242	0.979404	0.988567
524	ZNF790-AS1	CTD-2162K18.5	ASO_G0267254_06	Targeted lncRNA	r9b8p4	0.700121	0.677752	1.04783	1.1318	1.03666	1.08199	0.996939	0.997944	0.9965	0.966097	1.01787	0.953021	1.03011	1.08808	1.01536	1.07241	0.997517	1.00101	0.993283	0.984202	1.0539	1.07805	1.03965	1.07389	1.02711	1.10855	0.982701	0.962331
525	ZNF790-AS1	CTD-2162K18.5	ASO_G0267254_07	Targeted lncRNA	r9b8p4	0.725679	0.673768	0.96716	0.966311	1.00324	0.987655	1.00459	0.996289	0.984961	1.0167	1.01981	1.07069	0.995252	0.982069	0.992856	0.983574	1.01021	1.01824	1.02113	1.0272	0.980396	0.974749	0.98145	0.980658	0.956722	0.940185	1.0121	1.02241
526	ZNF790-AS1	CTD-2162K18.5	ASO_G0267254_AD_01	Targeted lncRNA	r12b2ADp5	1.02409	1.01384	0.925972	0.912035	1.02527	1.0513	0.98971	1.00256	0.966976	0.95311	0.998478	0.978746	0.97546	0.985013	0.963863	0.973513	0.967273	0.948908	0.956917	0.950562	0.987508	0.973808	0.980149	0.961914	0.969199	0.964903	0.979363	0.976473
527	ZNF790-AS1	CTD-2162K18.5	ASO_G0267254_AD_02	Targeted lncRNA	r12b2ADp5	0.986273	0.96187	0.940088	0.936432	0.978191	1.00329	0.995526	1.00736	1.00815	0.99657	1.04675	1.04759	0.963168	0.974929	0.958627	0.969922	0.991285	0.968595	1.00101	0.977344	0.976194	0.950563	0.978181	0.959071	0.939553	0.94432	1.01157	1.01692
528	ZNF790-AS1	CTD-2162K18.5	ASO_G0267254_AD_03	Targeted lncRNA	r12b2ADp5	0.908478	0.936065	0.984555	0.970013	1.04611	1.05997	1.01073	1.00897	0.966481	0.943581	0.978219	0.975465	1.02154	1.02839	1.01475	1.02403	0.98114	0.964407	0.992492	0.980965	0.982611	0.970589	0.976619	0.972878	0.995595	1.0055	0.995319	1.00221
529	ZNF790-AS1	CTD-2162K18.5	ASO_G0267254_AD_07	Targeted lncRNA	r12b2ADp5	0.970274	0.934662	0.92088	1	1.03111	1.03473	1.00275	1.00381	0.980714	0.972001	1.03678	1.01099	0.984696	1.03733	0.976763	1.02862	0.970301	1.01518	0.974429	1.02118	0.959731	0.989579	0.964953	0.991394	0.949991	0.998512	1.00837	1.00431
530	ZNF790-AS1	CTD-2162K18.5	ASO_G0267254_AD_09	Targeted lncRNA	r12b2ADp5	1.01391	1.03555	0.890617	0.958964	1.01541	1.05109	1.00188	1.00695	0.977753	0.982872	0.996496	0.998566	0.961517	1.01485	0.954581	1.00732	0.947736	0.974241	0.952457	0.983713	0.953594	0.96588	0.95586	0.965656	0.947835	0.979019	0.990355	0.996691
531	WFDC21P	CTD-2319I12.1	ASO_G0261040_01	Targeted lncRNA	r9b8p5	0.977949	0.932597	0.971113	1.03354	1.00884	1.03342	1.00741	1.01093	0.981596	0.941262	0.996789	0.971932	0.991935	1.03369	0.988801	1.03352	0.976084	0.988955	0.981571	0.999871	0.98652	0.992645	0.989406	0.989883	1.00276	1.02975	0.993339	0.998994
532	WFDC21P	CTD-2319I12.1	ASO_G0261040_05	Targeted lncRNA	r9b8p5	0.954683	0.983369	0.938773	0.977379	1.01797	0.98	1.00066	0.994458	0.981256	1.01178	1.02961	1.0396	0.984356	0.980842	0.976919	0.980692	0.967556	0.994153	0.961997	0.998972	1.00054	0.982718	0.980557	0.988764	0.973035	0.981526	0.980474	1.01251
533	WFDC21P	CTD-2319I12.1	ASO_G0261040_06	Targeted lncRNA	r9b8p5	0.890359	0.908614	0.979205	1.01331	0.954218	1.00522	0.981068	1.00555	1.0368	0.986753	1.07827	1.01354	0.969095	1.01916	0.968451	1.02126	1.01581	0.985498	1.02247	0.993097	1.01688	0.979953	1.02376	0.98693	0.969352	1.02412	1.01073	1.01099
534	WFDC21P	CTD-2319I12.1	ASO_G0261040_08	Targeted lncRNA	r9b8p5	0.929021	0.983634	0.904621	1.01214	1.02972	1.06882	1.00118	1.01496	0.984391	0.96047	1.03645	0.985856	0.972232	1.05823	0.96291	1.04992	0.946282	0.980221	0.954318	0.994303	0.946241	0.95913	0.946264	0.959558	0.949695	1.01759	1.00584	1.00421
535	WFDC21P	CTD-2319I12.1	ASO_G0261040_10	Targeted lncRNA	r9b8p5	1.00187	1.0628	0.936177	0.990852	0.964493	1.05323	0.990426	1.01422	1.02429	0.955742	1.06677	0.965549	0.950949	1.02281	0.949291	1.02358	0.990724	0.96989	1.00244	0.975143	0.976309	0.961614	0.98151	0.964899	0.948397	1.01506	1.00929	1.002
536	CTD-2319I12.4	CTD-2319I12.4	ASO_G0267248_01	Targeted lncRNA	r9b8p4	0.87933	0.884535	0.887805	1.00157	0.965661	1.0468	0.985192	1.0081	1.01948	0.970233	1.03584	0.990729	0.920149	1.02625	0.914108	1.02014	0.946558	0.967622	0.958418	0.971798	0.977721	0.988904	0.982666	0.987812	0.941767	1.0271	0.987693	0.987558
537	CTD-2319I12.4	CTD-2319I12.4	ASO_G0267248_02	Targeted lncRNA	r9b8p4	0.826339	0.806311	0.91507	1.00079	0.964152	0.959492	0.992331	0.989912	1.01339	1.03709	1.00183	1.04856	0.934566	0.9717	0.93878	0.969646	0.989613	1.02148	0.982087	1.01493	1.00956	1.01529	1.00271	1.02291	0.955162	0.988726	0.975841	1.00558
538	CTD-2319I12.4	CTD-2319I12.4	ASO_G0267248_05	Targeted lncRNA	r9b8p4	0.94755	0.889315	0.990105	0.93182	1.04731	0.99881	1.00474	0.997481	0.981512	1.03369	0.992714	1.04757	1.01188	0.963852	1.00238	0.953557	0.967781	0.974182	0.965094	0.982294	0.999319	0.97331	0.988717	0.974844	1.00899	0.952805	0.979046	0.998802
539	CTD-2319I12.4	CTD-2319I12.4	ASO_G0267248_08	Targeted lncRNA	r9b8p4	0.883616	0.8431	0.958394	0.975689	1.00526	0.970448	0.990562	0.986523	0.965712	1.02048	0.987602	1.02496	0.986357	0.960181	0.985209	0.958207	0.995674	0.999353	0.98489	1.00466	1.00349	1.00746	0.994187	1.01744	0.983012	0.962469	0.981908	1.00398
540	CTD-2319I12.4	CTD-2319I12.4	ASO_G0267248_AD_02	Targeted lncRNA	r12b2ADp5	1.05108	1.03386	0.894354	0.940299	1.03342	1.06557	0.9949	1.01244	0.967744	0.967087	0.973618	0.960199	0.956581	1.00337	0.956126	0.991311	0.941373	0.965271	0.951381	0.965331	0.966146	0.963382	0.962001	0.956215	0.954789	0.981258	0.974608	0.976691
541	CTD-2319I12.4	CTD-2319I12.4	ASO_G0267248_AD_03	Targeted lncRNA	r12b2ADp5	0.842438	0.885793	0.888133	0.910645	1.04143	0.97673	1.0052	0.995721	1.00707	1.01631	1.0796	1.10947	0.979687	0.954205	0.965555	0.947682	0.952372	0.988575	0.983901	1.01727	0.923502	0.943632	0.926907	0.951093	0.914379	0.90456	1.02355	1.03306
542	CTD-2319I12.4	CTD-2319I12.4	ASO_G0267248_AD_05	Targeted lncRNA	r12b2ADp5	0.896533	0.916082	0.99421	0.9557	1.03756	1.03512	1.01458	1.01089	0.975434	0.971755	1.01601	1.02355	1.03222	1.00293	1.02525	0.992609	0.982288	0.9557	0.9972	0.96708	0.959121	0.94286	0.959119	0.944629	0.980103	0.974083	1.01914	1.01613
543	CTD-2319I12.4	CTD-2319I12.4	ASO_G0267248_AD_07	Targeted lncRNA	r12b2ADp5	0.906817	0.933375	1.05906	0.953463	1.04229	1.02424	0.997654	0.991275	0.993694	1.00334	1.00561	1.00204	1.04226	0.989678	1.034	0.986581	1.00696	0.951009	0.994776	0.9549	1.01641	0.993227	1.01838	1.00088	1.03612	1.00513	0.995948	0.988834
544	CTD-2319I12.4	CTD-2319I12.4	ASO_G0267248_AD_08	Targeted lncRNA	r12b2ADp5	0.998777	0.959969	1.05282	0.927551	0.981015	1.01158	1.00447	1.002	0.972035	0.974925	0.993609	0.999815	1.01681	0.971875	1.0261	0.972258	1.03238	0.963411	1.01873	0.962778	1.01744	0.964583	1.00911	0.969085	1.01851	0.956457	1.00094	0.995425
545	CTD-2336O2.1	CTD-2336O2.1	ASO_G0253982_01	Targeted lncRNA	r8b7p3	1.00953	1.07103	0.953153	0.950012	0.954651	0.965946	0.990173	1.00465	0.985072	1.01878	0.98879	1.05614	0.939687	0.962545	0.94609	0.960835	0.981904	0.987724	0.982023	1.01257	1.023	0.952489	1.01231	0.955225	0.970533	0.939798	0.971056	1.02477
546	CTD-2336O2.1	CTD-2336O2.1	ASO_G0253982_02	Targeted lncRNA	r8b7p3	1.07429	1.03841	0.972499	1.03471	1.02996	1.05625	1.00911	1.00874	0.989821	0.993896	0.920553	0.954876	1.00019	1.04973	1.00147	1.05467	0.979225	1.0034	0.969729	0.99551	0.997474	0.99842	0.985047	1.00294	1.00764	1.04505	0.964871	0.988503
547	CTD-2336O2.1	CTD-2336O2.1	ASO_G0253982_05	Targeted lncRNA	r8b7p3	1.01106	0.94339	0.929278	0.974088	0.99927	0.927727	0.985225	0.976863	0.983786	1.05492	1.0021	1.0789	0.968462	0.941559	0.966282	0.938697	0.988677	1.02572	0.978645	1.01946	1.01276	1.02565	1.00171	1.03344	0.967223	0.955118	0.968804	1.00576
548	CTD-2336O2.1	CTD-2336O2.1	ASO_G0253982_06	Targeted lncRNA	r8b7p3	0.971087	0.962717	0.967589	0.951518	1.03271	0.987389	0.999722	1.00038	0.973139	1.00549	0.962129	1.03917	0.998043	0.96654	0.987663	0.960702	0.960362	0.981372	0.940017	0.99086	1.02682	0.983891	0.998268	0.979516	1.00424	0.952099	0.953718	1.0072
549	CTD-2336O2.1	CTD-2336O2.1	ASO_G0253982_08	Targeted lncRNA	r8b7p3	0.952327	0.895461	0.97193	0.951601	0.982576	1.03962	0.989558	0.999097	1.03019	0.988577	1.01967	0.985814	0.970032	0.993384	0.964898	0.977232	0.995037	0.967804	0.989964	0.97087	1.02058	1.00353	1.00887	0.992876	0.972037	0.976303	0.981024	0.976812
550	CTD-2336O2.1	CTD-2336O2.1	ASO_G0253982_AD_01	Targeted lncRNA	r13b3ADp6	0.968466	0.952674	1.09504	1.07039	1.02235	1.00107	1.00617	0.989619	0.97269	1.00435	0.973507	0.968546	1.06744	1.02388	1.05997	1.02558	1.02461	1.02021	1.02076	1.00474	1.04128	1.02801	1.0318	1.02495	1.06001	1.03596	0.983217	0.98537
551	CTD-2336O2.1	CTD-2336O2.1	ASO_G0253982_AD_04	Targeted lncRNA	r13b3ADp6	0.949543	0.932371	0.975484	1.02995	0.960491	1.01387	0.987139	0.999435	1.04133	1.02685	1.03871	1.02366	0.953756	1.02504	0.948466	1.01944	0.994548	1.00594	0.994113	1.003	1.01263	1.00277	1.01671	1.00544	0.961938	1.0132	1.00036	1.00477
552	CTD-2336O2.1	CTD-2336O2.1	ASO_G0253982_AD_06	Targeted lncRNA	r13b3ADp6	0.780506	0.749368	1.05515	1.00323	0.974156	1.03273	0.986694	0.989059	1.02946	0.980254	1.01733	0.970499	0.989435	1.01253	0.986962	0.992793	1.01275	0.999476	1.00572	0.986075	1.03683	1.03221	1.0418	1.01974	1.01786	1.00258	0.995635	0.967004
553	CTD-2336O2.1	CTD-2336O2.1	ASO_G0253982_AD_08	Targeted lncRNA	r13b3ADp6	0.767814	0.776579	1.00188	0.97514	1.02472	0.966552	1.00249	0.994893	1.01063	1.04151	1.02334	1.06081	1.00355	0.959587	0.993648	0.954609	0.984323	0.991721	0.990042	0.997653	0.977808	0.994435	0.981324	0.995917	0.980059	0.958881	1.00938	1.01102
554	CTD-2336O2.1	CTD-2336O2.1	ASO_G0253982_AD_10	Targeted lncRNA	r13b3ADp6	0.951244	0.914959	0.977946	1.06112	0.970509	0.99969	0.988271	0.990021	1.03739	1.01242	1.05175	1.02329	0.964327	1.03632	0.968814	1.03607	0.998292	1.0321	0.999989	1.03521	0.989548	1.02631	1.0017	1.02618	0.972363	1.02562	1.01624	1.01134
555	CTD-2366F13.1	CTD-2366F13.1	ASO_G0247796_02	Targeted lncRNA	r8b7p1	1.02421	0.980192	0.898549	0.917237	0.963192	0.984337	0.999168	1.00481	1.02148	0.984401	1.05025	1.01681	0.939972	0.957442	0.940322	0.958662	0.962045	0.975815	0.975191	0.978056	0.943894	0.951242	0.945802	0.944316	0.928024	0.942168	1.01468	1.0068
556	CTD-2366F13.1	CTD-2366F13.1	ASO_G0247796_04	Targeted lncRNA	r8b7p1	0.911933	0.890709	1.06851	0.987195	0.992141	0.937178	0.985059	0.984461	1.01433	1.03655	1.03525	1.0396	1.01664	0.944393	1.01346	0.945627	1.02095	1.01238	1.0064	1.00495	1.05843	1.02265	1.05326	1.01713	1.02997	0.957822	0.9973	0.995786
557	CTD-2366F13.1	CTD-2366F13.1	ASO_G0247796_05	Targeted lncRNA	r8b7p1	0.823283	0.811596	1.01369	0.946931	0.942378	0.953905	0.986334	0.988786	1.04461	1.01304	1.0744	1.07977	0.970065	0.95827	0.964976	0.948911	1.03685	1.00858	1.03377	1.00299	1.04312	0.992783	1.04265	0.987772	0.974899	0.942861	1.0086	1.01243
558	CTD-2366F13.1	CTD-2366F13.1	ASO_G0247796_07	Targeted lncRNA	r8b7p1	0.87398	0.840504	0.933139	0.947852	0.969267	0.955851	0.992331	0.992291	1.01898	1.04659	1.07161	1.08049	0.954902	0.957161	0.954727	0.946899	0.998296	0.994108	1.00155	1.00035	0.986869	0.986842	0.985014	0.990136	0.933945	0.942428	1.01595	1.00953
559	CTD-2366F13.1	CTD-2366F13.1	ASO_G0247796_10	Targeted lncRNA	r8b7p1	0.939576	0.944409	1.05212	0.95582	0.973775	0.995323	0.992366	0.992766	1.01126	1.00686	1.03414	1.00794	1.00004	0.978843	0.99893	0.970512	1.02886	0.992189	1.02092	0.992779	1.04946	1.00642	1.04922	1.00447	1.01904	0.972139	1.00296	0.991254
560	CTD-2532K18.2	CTD-2532K18.2	ASO_G0251144_04	Targeted lncRNA	r8b7p2	0.770681	0.822179	0.918938	0.89289	0.930975	0.918614	0.980925	0.977489	1.07273	1.0559	1.11226	1.10804	0.912455	0.903004	0.905532	0.900602	0.980836	0.980902	0.999738	1.00656	0.978728	0.973687	0.994701	0.992645	0.910349	0.900694	1.01476	1.03008
561	CTD-2532K18.2	CTD-2532K18.2	ASO_G0251144_05	Targeted lncRNA	r8b7p2	0.124492	0.154255	0.772876	0.782828	0.877945	0.873606	0.958874	0.962173	1.12309	1.12742	1.22354	1.20357	0.812546	0.819616	0.79582	0.801251	0.93232	0.920676	0.965172	0.951055	0.905779	0.90957	0.920815	0.929878	0.79985	0.817828	1.04056	1.03304
562	CTD-2532K18.2	CTD-2532K18.2	ASO_G0251144_06	Targeted lncRNA	r8b7p2	0.84522	0.837969	0.972856	0.971345	1.00942	0.997574	0.993101	0.999601	1.01884	0.977346	1.01613	0.97886	0.985076	0.984808	0.979842	0.982537	0.980372	0.973517	0.984606	0.970165	1.00769	0.997688	1.00999	1.00243	0.986707	0.996893	0.99184	0.987353
563	CTD-2532K18.2	CTD-2532K18.2	ASO_G0251144_07	Targeted lncRNA	r8b7p2	0.874502	0.947256	0.963184	1.10074	1.01073	0.938706	0.999968	0.984248	1.00194	1.00259	0.985762	1.00668	0.983705	1.00991	0.97918	1.01999	0.969329	1.06926	0.970497	1.05248	0.986302	1.10083	0.985189	1.09945	0.980072	1.05133	0.988518	0.997968
564	CTD-2587H24.5	CTD-2587H24.5	ASO_G0267577_01	Targeted lncRNA	r14b9plusp4	-0.378199	-0.399341	0.585648	0.52722	0.812022	0.750639	0.923352	0.908788	1.20503	1.2362	1.32182	1.35794	0.668463	0.606915	0.650377	0.589746	0.808829	0.787969	0.86673	0.853593	0.781846	0.745679	0.809573	0.775519	0.688616	0.621918	1.0576	1.069
565	CTD-2587H24.5	CTD-2587H24.5	ASO_G0267577_03	Targeted lncRNA	r14b9plusp4	0.816285	0.870466	0.884246	0.866869	0.900305	0.951061	0.976345	0.988743	1.10201	1.04487	1.19115	1.14713	0.88793	0.908901	0.89083	0.914789	1.02303	1.0012	1.03395	1.00294	0.941339	0.92107	0.957535	0.937349	0.870824	0.876319	1.05043	1.04155
566	CTD-2587H24.5	CTD-2587H24.5	ASO_G0267577_07	Targeted lncRNA	r14b9plusp4	0.778461	0.760505	1.02023	1.04335	0.954019	0.960634	0.994144	0.988878	1.01947	1.02943	1.05179	1.02323	0.980881	0.981029	0.975338	0.977579	1.01926	1.00485	1.01767	1.00602	1.02002	1.03803	1.02403	1.03309	0.979061	1.00095	1.01665	0.999353
567	CTD-2587H24.5	CTD-2587H24.5	ASO_G0267577_08	Targeted lncRNA	r14b9plusp4	0.946041	0.933251	0.928951	0.924327	1.00572	1.01809	1.00761	1.00603	0.983501	1.01503	1.00048	1.01312	0.968335	0.975891	0.965212	0.969626	0.966811	0.955881	0.974169	0.966455	0.972035	0.967178	0.966256	0.965227	0.953419	0.966275	0.996123	1.00544
568	CTD-2587H24.5	CTD-2587H24.5	ASO_G0267577_10	Targeted lncRNA	r14b9plusp4	0.999183	1.01161	0.980531	1.02068	1.01917	1.09379	0.999337	1.01339	0.974316	0.979598	0.972549	0.978611	0.999623	1.07481	0.991677	1.06428	0.973475	0.980741	0.97207	0.989132	0.9981	0.975367	0.992799	0.976529	0.999695	1.03169	0.987171	0.999958
569	CTD-2651B20.3	CTD-2651B20.3	ASO_G0259520_01	Targeted lncRNA	r3b2p4	0.899089	1.09486	0.968463	0.989196	0.955488	0.976535	0.999324	0.983214	1.01596	0.997507	1.00434	1.01373	0.964263	0.98296	0.964663	0.984138	1.01174	1.00636	1.00765	0.999607	1.0143	1.0212	1.01234	1.02525	0.973436	0.996003	0.99446	0.992267
570	CTD-2651B20.3	CTD-2651B20.3	ASO_G0259520_02	Targeted lncRNA	r3b2p4	0.998687	0.885312	0.990312	1.01345	0.944389	0.981445	0.984351	0.994686	1.00314	1.01994	1.00451	1.03134	0.95535	0.987312	0.959659	0.982897	1.00815	1.02554	1.00437	1.02133	1.04397	1.01586	1.04807	1.01511	0.99571	0.988952	0.985484	1.00131
571	CTD-2651B20.3	CTD-2651B20.3	ASO_G0259520_04	Targeted lncRNA	r3b2p4	0.963643	0.934569	0.946479	0.962098	0.914768	1.00558	0.980764	1.00306	1.00747	1.02753	1.05891	1.03492	0.917795	1.00233	0.92072	0.993558	1.00991	0.983487	1.01366	1.00273	1.02184	0.981702	1.0344	0.98871	0.936507	0.974689	1.01336	1.00629
572	CTD-2651B20.3	CTD-2651B20.3	ASO_G0259520_06	Targeted lncRNA	r3b2p4	1.02131	0.952467	0.90646	0.948937	0.94154	0.935423	0.980065	0.975661	1.03194	1.02581	1.04378	1.05767	0.908397	0.932626	0.906171	0.933613	0.990199	1.02209	0.988455	1.0147	1.00372	1.02651	1.01256	1.03738	0.927449	0.954461	0.994707	1.00462
573	CTD-2651B20.3	CTD-2651B20.3	ASO_G0259520_07	Targeted lncRNA	r3b2p4	0.806749	0.902896	0.932461	0.909688	0.925804	0.947655	0.976872	0.990509	1.05276	1.04424	1.0889	1.10084	0.929062	0.929434	0.927602	0.924352	0.991224	0.976785	1.00471	0.995234	0.996852	0.965321	1.01704	0.97431	0.941119	0.920316	1.01564	1.02423
574	CTD-2651B20.3	CTD-2651B20.3	ASO_G0259520_AD_03	Targeted lncRNA	r11b1ADp6	0.95367	0.956314	0.954421	0.956632	0.98249	0.995859	0.990876	0.993722	1.02637	0.998258	1.06919	1.00151	0.964898	0.977963	0.95773	0.97294	0.985019	0.97584	1.00751	0.986025	0.972793	0.999969	0.975468	1.00094	0.938275	0.983166	1.0166	0.992425
575	CTD-2651B20.3	CTD-2651B20.3	ASO_G0259520_AD_04	Targeted lncRNA	r11b1ADp6	0.596283	0.561995	1.12641	1.09172	1.03162	0.992566	0.999344	1.00508	0.966959	1.01998	0.973494	1.00162	1.07974	1.0383	1.07634	1.03062	1.02538	1.00363	1.02967	1.00958	1.05199	1.02654	1.03955	1.02914	1.08646	1.05792	0.993575	1.00723
576	CTD-2651B20.3	CTD-2651B20.3	ASO_G0259520_AD_05	Targeted lncRNA	r11b1ADp6	0.59868	0.641526	1.00605	0.888618	1.1521	1.12698	1.01791	1.01309	0.953967	0.993197	0.999167	1.05023	1.09823	1.02686	1.07971	1.00447	0.962768	0.903955	0.980722	0.93694	0.936192	0.885111	0.92992	0.883019	1.0109	0.949404	1.01812	1.02503
577	CTD-2651B20.3	CTD-2651B20.3	ASO_G0259520_AD_08	Targeted lncRNA	r11b1ADp6	0.679986	0.667785	1.05452	1.07179	1.02999	0.949291	0.999288	0.975137	0.997866	1.03746	1.00923	1.0561	1.03255	1.00477	1.02916	1.00774	0.999278	1.05774	1.00187	1.04204	1.02903	1.06268	1.03039	1.06585	1.0416	1.02239	0.993892	1.01185
578	CTD-2651B20.3	CTD-2651B20.3	ASO_G0259520_AD_09	Targeted lncRNA	r11b1ADp6	0.860689	0.808846	0.962145	1.03544	1.0141	1.04002	0.994798	1.00675	1.00635	1.00636	1.00754	0.992877	0.980863	1.03613	0.97156	1.02158	0.960088	0.981632	0.964588	0.990964	0.989154	0.988071	0.984608	0.978644	0.988789	1.02027	0.994343	0.996279
579	ZNF528-AS1	CTD-3018O17.3	ASO_G0269834_01	Targeted lncRNA	r14b9plusp1	0.993377	0.96213	0.913983	0.883987	1.01584	0.969113	0.995094	0.992096	0.995949	1.03595	1.04418	1.08108	0.970184	0.929033	0.95572	0.923906	0.958528	0.966015	0.971652	0.986289	0.963888	0.944032	0.970117	0.958144	0.948073	0.906598	1.00553	1.02311
580	ZNF528-AS1	CTD-3018O17.3	ASO_G0269834_02	Targeted lncRNA	r14b9plusp1	0.63992	0.712035	1.03615	0.925886	0.97144	0.944536	0.987358	0.990633	1.04396	1.02803	1.06259	1.05009	0.986247	0.937338	0.972761	0.922923	1.02909	0.97595	1.02831	0.989706	1.02692	1.01738	1.02257	1.01687	0.978035	0.938804	1.00964	0.998791
581	ZNF528-AS1	CTD-3018O17.3	ASO_G0269834_04	Targeted lncRNA	r14b9plusp1	0.879392	0.885075	1.0248	1.00152	0.945785	0.9658	0.984203	0.993192	1.04937	1.04395	1.03597	1.0703	0.984699	0.9858	0.979969	0.984025	1.03685	1.01622	1.02254	1.02085	1.04402	1.01703	1.04998	1.02263	0.997547	0.985207	1.00153	1.0104
582	ZNF528-AS1	CTD-3018O17.3	ASO_G0269834_05	Targeted lncRNA	r14b9plusp1	0.964044	0.95304	0.954658	0.899909	0.970914	1.04198	0.999816	1.01604	1.01085	0.982404	1.07123	1.02637	0.975191	0.991361	0.97542	0.984423	1.01508	0.951929	1.01832	0.96884	0.987982	0.921658	0.992902	0.91026	0.958917	0.934301	1.02441	1.01189
583	ZNF528-AS1	CTD-3018O17.3	ASO_G0269834_09	Targeted lncRNA	r14b9plusp1	0.963401	0.998413	0.796616	0.839503	0.883381	0.933157	0.976972	0.983881	1.08321	1.04625	1.17908	1.10546	0.846744	0.88962	0.849275	0.887593	0.986076	0.966629	1.00253	0.982425	0.91453	0.94828	0.934156	0.954754	0.826888	0.876817	1.04879	1.01897
584	ZNF528-AS1	CTD-3018O17.3	ASO_G0269834_AD_01	Targeted lncRNA	r12b2ADp6	0.928658	0.9499	0.937668	0.916243	1.05051	1.0539	1.00349	1.00276	1.01285	1.01205	1.01362	1.02653	1.01409	0.98523	1.0043	0.976954	0.971862	0.962164	0.980526	0.974319	0.942437	0.932025	0.94179	0.930745	0.972	0.936878	1.01181	1.01316
585	ZNF528-AS1	CTD-3018O17.3	ASO_G0269834_AD_02	Targeted lncRNA	r12b2ADp6	0.886459	0.870219	0.987955	0.883086	0.916672	1.02045	0.987858	1.00046	1.0602	1.04718	1.09343	1.06865	0.945191	0.959207	0.950718	0.948017	1.0242	0.957272	1.03503	0.973595	1.01563	0.926471	1.02122	0.927598	0.950178	0.916822	1.02521	1.0175
586	ZNF528-AS1	CTD-3018O17.3	ASO_G0269834_AD_05	Targeted lncRNA	r12b2ADp6	0.887144	0.912099	0.912115	0.870122	1.00597	0.956557	0.996296	0.995673	1.03908	1.05229	1.06181	1.10078	0.959745	0.911378	0.95039	0.90536	0.968308	0.95741	0.98031	0.978263	0.946448	0.940974	0.953121	0.951875	0.925155	0.891068	1.01663	1.02881
587	ZNF528-AS1	CTD-3018O17.3	ASO_G0269834_AD_06	Targeted lncRNA	r12b2ADp6	0.658394	0.654759	0.781504	0.739448	0.963876	0.972637	0.99309	0.986725	1.06192	1.07029	1.16275	1.16485	0.879254	0.864351	0.859859	0.844285	0.908807	0.889846	0.942615	0.938006	0.872497	0.855842	0.881971	0.863819	0.828801	0.812345	1.04058	1.04233
588	ZNF528-AS1	CTD-3018O17.3	ASO_G0269834_AD_08	Targeted lncRNA	r12b2ADp6	0.950434	1.00496	0.931312	0.945451	0.981723	0.978458	0.998095	0.997264	1.02943	1.02726	1.08611	1.05876	0.958016	0.966695	0.946864	0.965487	0.993489	0.995511	1.0007	1.00162	0.971908	0.979453	0.975156	0.981739	0.934605	0.957198	1.01754	1.01591
589	CTD-3074O7.5	CTD-3074O7.5	ASO_G0255517_01	Targeted lncRNA	r8b7p4	0.554035	0.445501	0.815451	0.698429	0.888369	0.818555	0.966238	0.946284	1.08252	1.1507	1.14676	1.2838	0.842734	0.744916	0.828717	0.736584	0.944719	0.917219	0.95532	0.940677	0.95579	0.890007	0.957994	0.911086	0.857689	0.753297	0.998695	1.03948
590	CTD-3074O7.5	CTD-3074O7.5	ASO_G0255517_02	Targeted lncRNA	r8b7p4	1.00149	0.917626	0.916542	0.923602	0.981205	0.957582	0.992456	0.990093	1.02745	1.03286	1.06528	1.08804	0.943599	0.945904	0.938297	0.933548	0.965255	0.976905	0.977613	0.990771	0.966485	1.00374	0.964223	0.992675	0.933079	0.934656	1.0039	1.00194
591	CTD-3074O7.5	CTD-3074O7.5	ASO_G0255517_05	Targeted lncRNA	r8b7p4	1.10907	1.01199	0.895732	0.944103	1.02481	0.97824	0.999447	0.988835	0.993141	1.0299	0.988938	1.04846	0.957222	0.964646	0.950499	0.962684	0.947206	0.997162	0.945702	0.998632	0.969536	0.990779	0.960804	0.991561	0.952661	0.965608	0.972145	1.00266
592	CTD-3074O7.5	CTD-3074O7.5	ASO_G0255517_07	Targeted lncRNA	r8b7p4	0.629491	0.604961	0.849151	0.851554	0.970101	0.938988	0.969857	0.95276	1.02133	1.06706	1.03164	1.15046	0.887338	0.878746	0.870802	0.865708	0.9031	0.945886	0.914237	0.956016	0.965142	0.955815	0.952904	0.958191	0.909982	0.873476	0.956164	0.990072
593	CTD-3074O7.5	CTD-3074O7.5	ASO_G0255517_09	Targeted lncRNA	r8b7p4	0.967134	0.937206	0.920472	0.974968	0.96204	0.952604	0.991454	0.988184	0.975756	1.0405	1.03385	1.07383	0.944433	0.962792	0.943289	0.955874	0.976247	0.999336	0.982807	0.999439	0.983714	1.0204	0.983562	1.01639	0.945465	0.975008	0.999429	1.00134
594	CTD-3131K8.2	CTD-3131K8.2	ASO_G0269439_02	Targeted lncRNA	r2b1p1	0.974624	0.970912	1.01914	1.02779	0.982792	1.01099	0.988622	1.0077	1.0197	0.982325	1.01978	0.999705	0.993113	1.02059	0.988867	1.02189	1.0124	1.01071	1.00937	1.00369	1.02338	0.992676	1.0182	0.989001	1.00267	1.01405	1.00138	1.00647
595	CTD-3131K8.2	CTD-3131K8.2	ASO_G0269439_05	Targeted lncRNA	r2b1p1	0.546097	0.615221	0.975917	1.03224	0.927182	0.946536	0.980278	0.98103	1.00811	1.02013	0.983557	1.00076	0.937315	0.96838	0.936289	0.965443	1.02365	1.02938	0.996735	1.0076	1.0701	1.06671	1.06558	1.05462	0.989543	1.00578	0.973443	0.981396
596	CTD-3131K8.2	CTD-3131K8.2	ASO_G0269439_07	Targeted lncRNA	r2b1p1	0.890435	0.88698	0.968671	0.866291	1.05321	0.966077	1.00882	0.994862	0.983781	1.03981	0.972428	1.08184	1.02354	0.920511	1.02581	0.917431	0.966053	0.972433	0.973991	0.98529	0.947201	0.923291	0.938796	0.927446	1.00076	0.890508	0.994826	1.02334
597	CTD-3131K8.2	CTD-3131K8.2	ASO_G0269439_08	Targeted lncRNA	r2b1p1	0.922775	0.97172	0.96278	0.916808	0.998717	0.906968	1.00774	0.990852	1.01298	1.08285	1.01527	1.10361	0.987621	0.91505	0.987583	0.913145	0.992346	1.01161	1.00122	1.02203	0.95912	0.972587	0.965139	0.981285	0.969125	0.908506	1.01083	1.03008
598	CTD-3131K8.2	CTD-3131K8.2	ASO_G0269439_09	Targeted lncRNA	r2b1p1	0.446638	0.366491	1.08804	1.12719	0.99131	0.980752	0.996463	0.988564	0.998843	1.02058	1.00797	1.01261	1.03582	1.05294	1.03295	1.03589	1.03529	1.05629	1.03121	1.03984	1.05914	1.09674	1.03521	1.07601	1.02884	1.05487	0.993764	0.981615
599	CTD-3131K8.2	CTD-3131K8.2	ASO_G0269439_AD_01	Targeted lncRNA	r12b2ADp6	1.01702	1.02688	0.977851	0.902208	0.993776	1.05009	0.994944	1.00221	0.97411	0.987471	0.99234	0.981064	0.991765	0.978889	0.99167	0.970438	0.998129	0.9412	0.989614	0.950521	1.01896	0.969432	1.01404	0.964016	0.996267	0.962791	0.986684	0.979781
600	CTD-3131K8.2	CTD-3131K8.2	ASO_G0269439_AD_02	Targeted lncRNA	r12b2ADp6	0.882437	0.954185	0.868796	0.872859	0.956057	1.0412	0.998914	1.01053	1.06059	0.986294	1.09659	1.07241	0.918405	0.970688	0.910397	0.959204	0.965783	0.92927	0.975115	0.949948	0.961387	0.901774	0.968248	0.905366	0.903561	0.923686	1.01913	1.02382
601	CTD-3131K8.2	CTD-3131K8.2	ASO_G0269439_AD_03	Targeted lncRNA	r12b2ADp6	0.906259	0.814279	0.896593	1.04326	0.977922	0.951893	0.987813	0.991325	1.02068	1.03597	1.05475	1.11432	0.930503	0.989023	0.924811	0.990249	0.96244	1.04012	0.969729	1.04499	0.979632	1.02402	0.984799	1.01607	0.923983	0.963159	1.00664	1.02897
602	CTD-3131K8.2	CTD-3131K8.2	ASO_G0269439_AD_04	Targeted lncRNA	r12b2ADp6	0.91657	0.945968	0.945473	0.971715	0.985938	1.02316	0.993961	0.996369	1.04346	1.00001	1.09798	1.05757	0.961189	0.996086	0.945314	0.980174	0.992949	0.98691	1.00541	0.990509	0.985688	1.00328	0.985961	0.996924	0.940096	0.980069	1.01805	1.00543
603	CTD-3131K8.2	CTD-3131K8.2	ASO_G0269439_AD_05	Targeted lncRNA	r12b2ADp6	0.935984	0.998125	0.917501	0.943481	1.06203	1.04415	1.01681	1.00973	1.0002	1.00741	1.02421	1.05867	0.997605	1.00235	0.983224	0.9947	0.956925	0.96653	0.973305	0.990083	0.947176	0.932319	0.933302	0.934144	0.946114	0.951588	1.00136	1.02716
604	CTD-3138B18.5	CTD-3138B18.5	ASO_G0268516_02	Targeted lncRNA	r14b9plusp1	0.966922	1.00417	0.933805	0.915317	0.978698	0.980615	0.988212	0.996618	1.01003	1.03698	1.02075	1.04643	0.961886	0.958377	0.957101	0.952633	0.991892	0.97349	0.991811	0.987156	0.999573	0.963931	1.01001	0.975439	0.965389	0.945792	0.993911	1.01167
605	CTD-3138B18.5	CTD-3138B18.5	ASO_G0268516_03	Targeted lncRNA	r14b9plusp1	0.969586	0.954927	0.937332	0.994665	0.98064	1.03333	0.988404	1.00684	1.01059	0.97219	1.03583	1.00417	0.962779	1.01357	0.955137	1.00627	0.968212	0.979694	0.978305	0.984718	0.98426	0.967606	0.99254	0.969783	0.958753	0.984325	1.00074	1.00382
606	CTD-3138B18.5	CTD-3138B18.5	ASO_G0268516_04	Targeted lncRNA	r14b9plusp1	0.933461	0.912656	0.971237	1.00079	1.00798	1.01299	0.995756	0.993692	1.0248	1.0174	1.00916	1.01888	0.983806	1.00922	0.976279	1.00466	1.0001	0.995735	0.99159	0.994002	0.992135	1.02799	0.987118	1.02127	0.974235	1.0013	0.996803	0.99154
607	CTD-3138B18.5	CTD-3138B18.5	ASO_G0268516_07	Targeted lncRNA	r14b9plusp1	0.88245	0.851251	0.891421	0.950542	0.900455	0.946721	0.978363	0.980623	1.06414	1.04377	1.11895	1.06886	0.887634	0.941748	0.890292	0.938599	0.996453	0.993807	0.996706	1.00034	0.980743	0.992448	0.995737	1.00312	0.902153	0.949457	1.02191	1.01643
608	CTD-3138B18.5	CTD-3138B18.5	ASO_G0268516_10	Targeted lncRNA	r14b9plusp1	0.924617	0.864669	0.852625	0.861497	0.937049	0.970335	0.990984	0.989816	1.04743	1.01141	1.09875	1.07195	0.898407	0.914826	0.890771	0.913157	0.962242	0.962619	0.983201	0.981154	0.946486	0.95525	0.955971	0.95701	0.87965	0.896078	1.02073	1.0119
609	MHENCR	CTD-3184A7.4	ASO_G0232442_01	Targeted lncRNA	r2b1p6	0.998729	0.934183	0.907552	0.961897	0.839324	0.842377	0.961634	0.963891	1.10138	1.08812	1.13669	1.10308	0.848213	0.875849	0.857374	0.889094	1.02274	1.02987	1.01804	1.01294	1.02049	1.05021	1.03872	1.06323	0.890786	0.937683	1.01958	1.01404
610	MHENCR	CTD-3184A7.4	ASO_G0232442_02	Targeted lncRNA	r2b1p6	1.08131	0.983004	0.957766	0.987911	0.89014	0.887357	0.976491	0.977578	1.05201	1.07399	1.08879	1.0428	0.907517	0.921606	0.913444	0.929829	1.03127	1.04468	1.02888	1.03064	1.0152	1.07139	1.02836	1.07864	0.923513	0.965501	1.02068	1.00031
611	MHENCR	CTD-3184A7.4	ASO_G0232442_03	Targeted lncRNA	r2b1p6	0.877633	0.846986	0.983406	1.07799	0.933141	0.908428	0.978694	0.9755	1.01949	1.03252	1.00186	1.03452	0.943478	0.97586	0.944483	0.988332	1.01383	1.07604	0.988744	1.05703	1.05433	1.10375	1.05777	1.1058	0.98465	1.02184	0.978465	0.998187
612	MHENCR	CTD-3184A7.4	ASO_G0232442_04	Targeted lncRNA	r2b1p6	1.04061	1.056	1.01294	1.03768	0.945124	0.907074	0.989739	0.984054	1.04406	1.02109	1.03095	1.04828	0.968094	0.956409	0.978687	0.966564	1.022	1.04845	1.01448	1.03854	1.01871	1.06087	1.03395	1.0616	0.993009	0.98448	1.0096	1.01449
613	MHENCR	CTD-3184A7.4	ASO_G0232442_07	Targeted lncRNA	r2b1p6	0.95465	0.989673	1.00171	1.05624	0.945401	0.957516	0.992027	0.994791	1.05918	0.996352	1.02625	1.01636	0.958732	0.990185	0.968524	0.994095	1.01369	1.04123	1.01754	1.0401	1.01383	1.04623	1.01718	1.04187	0.979968	1.00587	1.00314	1.00218
614	DANCR	DANCR	ASO_G0226950_01	Targeted lncRNA	r1b0p6	0.926404	0.777858	0.967129	0.991697	0.940269	0.979134	0.976224	0.987879	1.03608	1.0197	1.04958	1.0198	0.943185	0.980152	0.943193	0.9761	0.996084	0.998953	0.992114	0.998503	1.06242	1.02877	1.05986	1.02723	0.974666	0.991389	0.986678	0.994803
615	DANCR	DANCR	ASO_G0226950_02	Targeted lncRNA	r1b0p6	0.902657	0.873303	1.04892	1.15106	0.892673	0.836916	0.968022	0.955009	1.01142	1.03642	1.00642	1.03709	0.945276	0.949475	0.956436	0.95893	1.06099	1.13912	1.03047	1.10459	1.10454	1.20191	1.10694	1.19872	1.0109	1.04041	0.985144	0.994285
616	DANCR	DANCR	ASO_G0226950_03	Targeted lncRNA	r1b0p6	1.00011	0.934022	1.05918	0.991033	0.85438	0.943358	0.964199	0.985653	1.07078	1.05587	1.11331	1.04292	0.93384	0.965397	0.939812	0.964269	1.10061	1.02546	1.08429	1.02303	1.10782	1.02409	1.11828	1.0289	0.976809	0.972808	1.01546	1.00265
617	DANCR	DANCR	ASO_G0226950_04	Targeted lncRNA	r1b0p6	0.564778	0.595973	1.06109	0.921192	0.714978	0.728788	0.905715	0.899834	1.13229	1.15459	1.11023	1.15928	0.812684	0.768062	0.829355	0.776532	1.13987	1.06666	1.08186	1.03696	1.25516	1.15366	1.25622	1.16101	0.978628	0.891341	0.979257	0.98465
618	DANCR	DANCR	ASO_G0226950_05	Targeted lncRNA	r1b0p6	0.643969	0.768556	1.07412	1.02214	0.800827	0.777824	0.938603	0.934989	1.11346	1.11152	1.09088	1.11558	0.883297	0.858715	0.893699	0.866753	1.12366	1.1142	1.0808	1.08866	1.19157	1.18214	1.18594	1.18233	0.984649	0.949644	0.983194	0.991484
619	DANCR	DANCR	ASO_G0226950_AD_01	Targeted lncRNA	r10b0ADp6	1.03733	1.03525	0.975794	1.02774	1.03303	1.01217	0.998284	1.00003	1.01217	0.985098	1.00619	0.972647	1.01422	1.03114	1.00456	1.02074	0.982875	1.02065	0.978537	1.00228	1.00328	1.0344	0.997407	1.0242	0.999004	1.02453	0.99478	0.982684
620	DANCR	DANCR	ASO_G0226950_AD_03	Targeted lncRNA	r10b0ADp6	0.959288	0.927455	0.968773	0.99146	0.999771	0.991725	0.99583	0.999824	1.0071	1.02179	1.03852	1.06298	0.980367	0.993976	0.973995	0.982966	0.995054	1.00554	0.990863	1.01054	0.999791	1.0081	0.994329	1.00502	0.978396	0.971337	0.994878	1.01119
621	DANCR	DANCR	ASO_G0226950_AD_04	Targeted lncRNA	r10b0ADp6	0.922888	0.885326	1.05161	0.987444	0.976766	0.939547	0.994148	0.984568	1.01391	1.04523	1.04326	1.07926	1.00613	0.965274	1.00693	0.96144	1.0407	1.02482	1.03	1.02028	1.03771	1.02381	1.04046	1.02722	1.00671	0.971536	1.01425	1.01669
622	DANCR	DANCR	ASO_G0226950_AD_07	Targeted lncRNA	r10b0ADp6	0.812413	0.853747	0.943128	0.918235	0.933689	0.92286	0.987681	0.981996	1.04411	1.04626	1.05784	1.09988	0.920754	0.909273	0.912657	0.895817	0.983861	0.980575	0.982932	0.98696	1.02091	1.00473	1.02488	1.0065	0.95049	0.916809	0.994936	1.00601
623	DANCR	DANCR	ASO_G0226950_AD_08	Targeted lncRNA	r10b0ADp6	0.904283	0.932526	0.948838	0.942698	0.982191	0.946542	0.998396	0.983218	1.01757	1.01946	1.05216	1.04847	0.972984	0.943106	0.966942	0.94889	0.999683	0.995042	0.994848	0.992489	0.991461	1.00148	0.988139	1.00686	0.956745	0.955812	1.00855	1.00998
624	DGUOK-AS1	DGUOK-AS1	ASO_G0237883_01	Targeted lncRNA	r7b6p6	1.05196	0.931081	0.982605	1.00734	0.985602	0.992846	0.99611	1.00332	0.986535	0.99947	0.979528	1.01818	0.982904	1.00219	0.981842	1.00293	0.993563	1.02736	0.975031	1.01475	1.04028	1.01164	1.02666	1.0087	1.0147	0.99353	0.962458	1.00209
625	DGUOK-AS1	DGUOK-AS1	ASO_G0237883_02	Targeted lncRNA	r7b6p6	1.00973	0.935934	0.919392	0.994904	1.0262	0.993107	0.998687	0.99857	0.957571	1.02025	0.954055	1.01744	0.965622	0.997236	0.961907	0.997087	0.943928	1.0103	0.930728	1.00515	0.991276	1.00753	0.97121	1.00886	0.979079	1.00228	0.952918	1.00353
626	DGUOK-AS1	DGUOK-AS1	ASO_G0237883_03	Targeted lncRNA	r7b6p6	0.910358	0.832846	0.95257	0.942093	0.986763	0.937569	0.985039	0.99005	1.02136	1.04785	1.01809	1.08875	0.960581	0.938208	0.951711	0.931796	0.992397	1.00566	0.974795	1.01004	1.0239	1.00149	1.01164	1.00575	0.969362	0.938812	0.967202	1.00909
627	DGUOK-AS1	DGUOK-AS1	ASO_G0237883_04	Targeted lncRNA	r7b6p6	0.75661	0.772601	0.926489	0.984039	1.02336	0.923718	1.00401	0.996009	0.985254	1.0565	0.992488	1.12864	0.983867	0.944253	0.973994	0.940916	0.970469	1.02954	0.970918	1.03723	0.974235	0.972422	0.958926	0.98196	0.959154	0.928273	0.981125	1.04778
628	DGUOK-AS1	DGUOK-AS1	ASO_G0237883_07	Targeted lncRNA	r7b6p6	0.881943	0.876176	0.929384	0.987486	1.02277	0.955314	0.990194	0.996012	0.999448	1.06589	1.00029	1.06491	0.976122	0.970808	0.977016	0.966189	0.968817	1.00652	0.97562	1.00739	0.974135	0.983168	0.974679	0.988846	0.966315	0.966267	0.992507	1.0201
629	DLGAP1-AS1	DLGAP1-AS1	ASO_G0177337_01	Targeted lncRNA	r15bALLp2	1.03929	1.12532	0.888683	0.937567	1.02613	0.98231	0.978487	0.988451	0.960145	0.97311	0.948784	0.993228	0.940213	0.954097	0.938831	0.952115	0.922737	0.986191	0.925542	0.981732	1.00306	1.01333	0.994085	1.00406	0.975778	0.967071	0.95442	0.9827
630	DLGAP1-AS1	DLGAP1-AS1	ASO_G0177337_02	Targeted lncRNA	r15bALLp2	0.978377	0.896066	0.936432	1.02705	0.999481	1.04119	0.998888	1.0101	0.994489	0.964266	0.99926	0.993846	0.968964	1.04303	0.970705	1.04356	0.973355	0.988432	0.979087	1.00071	0.958129	0.974856	0.964277	0.972452	0.961054	1.01974	1.0047	1.00912
631	DLGAP1-AS1	DLGAP1-AS1	ASO_G0177337_03	Targeted lncRNA	r15bALLp2	0.943587	0.969972	0.935963	0.992704	0.931676	1.00981	0.98322	1.00073	1.03269	0.98503	1.05766	0.995223	0.934579	1.00376	0.931996	0.9986	0.995733	0.985146	1.00368	0.996425	0.986185	0.994719	0.990808	0.992552	0.929411	1.00118	1.01605	1.00098
632	DLGAP1-AS1	DLGAP1-AS1	ASO_G0177337_04	Targeted lncRNA	r15bALLp2	1.05026	1.02108	1.0477	1.0024	1.01764	0.997579	0.995557	0.993386	0.961042	0.98884	0.945811	0.951486	1.02857	0.991496	1.03238	0.992468	1.00994	0.993641	0.995801	0.984374	1.04079	1.03869	1.04001	1.02948	1.05751	1.03433	0.978339	0.978326
633	DLGAP1-AS1	DLGAP1-AS1	ASO_G0177337_09	Targeted lncRNA	r15bALLp2	1.01416	0.965376	0.975559	1.02397	0.988759	1.01906	0.998523	1.00208	1.00809	1.00606	1.04108	1.00711	0.989078	1.03286	0.982018	1.03732	0.997419	1.00726	1.00693	1.00983	0.983923	0.99474	0.982282	0.992675	0.968472	1.02179	1.01829	1.00531
634	DNAJC27-AS1	DNAJC27-AS1	ASO_G0224165_01	Targeted lncRNA	r4b4p2	0.950332	0.946361	1.15611	1.05683	1.05046	0.991136	1.0097	0.99765	1.00371	0.998942	0.953644	0.971802	1.10878	1.00751	1.11537	1.01639	1.06054	1.03671	1.04587	1.02436	1.06577	1.0479	1.0629	1.05765	1.11449	1.0404	0.996709	0.991452
635	DNAJC27-AS1	DNAJC27-AS1	ASO_G0224165_04	Targeted lncRNA	r4b4p2	0.930882	1.01377	1.07417	0.988311	1.00793	1.00507	0.999882	0.99815	0.985838	1.01654	0.995042	1.05201	1.04975	1.01003	1.04554	1.0075	1.01533	1.0042	1.0153	1.01628	1.04455	0.992345	1.04934	1.00631	1.05642	0.984504	0.995162	1.01965
636	DNAJC27-AS1	DNAJC27-AS1	ASO_G0224165_06	Targeted lncRNA	r4b4p2	0.988265	0.919333	1.01794	1.02104	0.980896	1.03362	0.992736	0.999383	1.02469	1.03618	1.03228	1.03346	0.989649	1.03712	0.98761	1.03371	1.01667	0.99516	1.02439	1.00627	1.00957	0.996049	1.00953	1.00802	0.980118	1.01397	1.00561	1.01645
637	DNAJC27-AS1	DNAJC27-AS1	ASO_G0224165_09	Targeted lncRNA	r4b4p2	0.733343	0.774967	0.866042	0.951738	0.878121	0.868201	0.964938	0.96326	1.0938	1.08226	1.11074	1.06692	0.843675	0.881873	0.836095	0.884559	0.96888	1.03229	0.975919	1.02265	0.985521	1.03028	1.00215	1.04077	0.902	0.942842	1.00613	1.0069
638	DNAJC27-AS1	DNAJC27-AS1	ASO_G0224165_10	Targeted lncRNA	r4b4p2	0.951418	0.816731	1.07003	1.07554	0.867544	0.938546	0.95357	0.977022	1.08106	1.03568	1.04059	0.998655	0.930099	0.985415	0.939213	0.985609	1.09525	1.05204	1.06146	1.02762	1.13095	1.09253	1.152	1.09993	1.0152	1.05098	0.994013	0.985368
639	DNAJC27-AS1	DNAJC27-AS1	ASO_G0224165_AD_01	Targeted lncRNA	r12b2ADp1	0.729871	0.663544	0.955491	0.88452	0.928392	0.995279	0.968171	0.981559	1.02845	1.01607	1.02635	1.05627	0.909017	0.927268	0.912579	0.910132	0.989367	0.939244	0.970249	0.942851	1.03036	0.967177	1.03211	0.960938	0.966838	0.929024	0.980546	0.989045
640	DNAJC27-AS1	DNAJC27-AS1	ASO_G0224165_AD_03	Targeted lncRNA	r12b2ADp1	0.94791	0.993471	1.08648	1.06122	1.02615	1.00283	0.989912	0.990797	0.981343	0.984637	0.944295	0.977357	1.0524	1.02028	1.05903	1.01978	1.0384	1.02204	1.01151	1.01794	1.06807	1.05963	1.06761	1.05743	1.0862	1.03076	0.979812	0.97791
641	DNAJC27-AS1	DNAJC27-AS1	ASO_G0224165_AD_07	Targeted lncRNA	r12b2ADp1	0.899606	0.931692	0.967893	0.968874	1.05158	1.10088	1.00533	1.01414	0.951956	0.938837	0.954296	0.899009	1.00439	1.0352	0.990817	1.0314	0.947597	0.944391	0.954593	0.943147	0.99583	0.99443	0.98231	0.977883	0.996422	1.0391	0.973271	0.960575
642	DNAJC27-AS1	DNAJC27-AS1	ASO_G0224165_AD_08	Targeted lncRNA	r12b2ADp1	0.933826	0.965914	1.03184	1.0431	1.03727	0.955601	1.00774	0.993158	0.977446	1.01105	0.957455	0.996492	1.02227	0.984127	1.01648	0.992168	0.977412	1.03907	0.97796	1.02166	0.988207	1.04416	0.986756	1.03894	1.03472	1.01377	0.987717	1.00002
643	DNAJC27-AS1	DNAJC27-AS1	ASO_G0224165_AD_10	Targeted lncRNA	r12b2ADp1	0.915197	0.918074	0.932229	0.990081	0.917164	0.974754	0.975751	0.980869	1.02701	0.988064	1.03553	0.964558	0.903729	0.958644	0.908403	0.965826	0.998483	1.0091	0.986417	0.989958	1.00873	1.05341	1.01333	1.04639	0.943928	1.00523	0.989406	0.966895
644	DNM3OS	DNM3OS	ASO_G0230630_01	Targeted lncRNA	r1b0p2	0.902255	0.849692	0.822074	0.860481	0.847887	0.875233	0.966334	0.97527	1.04347	1.05448	1.13081	1.10551	0.833765	0.867021	0.832862	0.861485	0.969865	0.971072	0.978954	0.988672	0.988807	0.981772	0.99741	0.989425	0.863791	0.886592	1.01172	1.01131
645	DNM3OS	DNM3OS	ASO_G0230630_02	Targeted lncRNA	r1b0p2	0.70889	0.877385	0.874515	0.762067	0.898262	0.816978	0.9805	0.953869	1.06584	1.12321	1.14147	1.22124	0.884355	0.780244	0.87875	0.768698	0.972404	0.948994	0.98929	0.968736	0.96159	0.965999	0.977044	0.986339	0.877738	0.802836	1.03079	1.02544
646	DNM3OS	DNM3OS	ASO_G0230630_03	Targeted lncRNA	r1b0p2	1.07222	1.06204	0.895357	0.926731	0.886976	0.885122	0.972397	0.967602	1.00775	1.04862	1.11275	1.10067	0.884684	0.902076	0.888939	0.899701	1.00604	1.00885	1.00865	1.00861	0.997859	1.03251	1.00397	1.04013	0.904572	0.934157	1.02491	1.0059
647	DNM3OS	DNM3OS	ASO_G0230630_05	Targeted lncRNA	r1b0p2	0.900518	1.00452	0.89508	0.936473	0.939373	0.962112	0.992477	0.98753	1.06204	1.01171	1.10616	1.09619	0.915011	0.953791	0.905835	0.940302	0.979587	0.980324	0.999218	1.00089	0.974621	0.990245	0.983237	0.990662	0.904134	0.942813	1.02277	1.01838
648	DNM3OS	DNM3OS	ASO_G0230630_06	Targeted lncRNA	r1b0p2	0.854799	0.992259	1.18558	0.98337	1.0089	0.953983	1.00569	0.99321	0.980175	0.996262	0.974419	1.03102	1.08941	0.977403	1.08911	0.974052	1.06687	1.01178	1.05298	1.01891	1.06633	1.01106	1.06388	1.00967	1.09612	0.97996	1.00284	1.00894
649	DNM3OS	DNM3OS	ASO_G0230630_AD_01	Targeted lncRNA	r10b0ADp2	0.969096	0.947834	1.02513	0.95272	0.975785	1.01162	0.988066	0.998723	0.987098	0.989743	1.01761	1.02864	0.997746	0.981861	0.999359	0.982368	1.02519	0.967549	1.01341	0.983334	1.04158	0.976524	1.04202	0.977256	1.01531	0.968094	0.996031	1.00663
650	DNM3OS	DNM3OS	ASO_G0230630_AD_02	Targeted lncRNA	r10b0ADp2	0.861513	0.914123	1.07858	1.07542	1.02261	1.06206	0.998897	1.00836	0.999167	0.978048	1.00013	0.981369	1.04328	1.0773	1.02922	1.06596	1.02603	1.00862	1.0204	1.01003	1.07228	1.04196	1.06563	1.03234	1.04657	1.05792	0.977377	0.990801
651	DNM3OS	DNM3OS	ASO_G0230630_AD_04	Targeted lncRNA	r10b0ADp2	0.550498	0.526282	0.906097	0.90426	0.901817	0.865957	0.97082	0.964609	1.0999	1.10919	1.20566	1.22051	0.90231	0.875197	0.896556	0.882019	1.03575	1.06422	1.03831	1.06971	0.97181	0.977204	0.977317	0.997411	0.880357	0.86909	1.04598	1.0594
652	DNM3OS	DNM3OS	ASO_G0230630_AD_09	Targeted lncRNA	r10b0ADp2	0.767479	0.758302	0.885336	0.983757	0.919537	0.908681	0.967128	0.971845	1.0431	1.06065	1.07093	1.10633	0.884316	0.934287	0.876942	0.934825	0.965619	1.02894	0.960765	1.02479	0.999236	1.02465	0.995512	1.0366	0.909355	0.955125	0.987598	1.01343
653	DNM3OS	DNM3OS	ASO_G0230630_AD_10	Targeted lncRNA	r10b0ADp2	0.865491	0.88007	1.04917	1.00685	1.04283	0.994895	1.00378	0.999363	0.992416	1.01516	0.988987	1.03372	1.05233	1.00006	1.0449	0.993255	1.01247	1.0023	1.00565	1.00745	1.03304	0.99103	1.03248	0.992308	1.04622	0.990806	0.98682	1.0158
654	NRAV	DYNLL1-AS1	ASO_G0248008_01	Targeted lncRNA	r8b7p1	0.993123	0.984905	1.03423	1.04046	0.988023	0.99957	1.0026	0.996897	0.993478	1.03232	1.00397	1.0397	1.01413	1.02035	1.0073	1.01687	1.01812	1.02861	1.01059	1.03363	1.03071	1.01566	1.02133	1.01679	1.00951	0.998744	0.991551	1.01635
655	NRAV	DYNLL1-AS1	ASO_G0248008_02	Targeted lncRNA	r8b7p1	0.771933	0.810149	0.951498	0.858663	0.903984	0.884111	0.978375	0.967496	1.07352	1.08229	1.14113	1.15166	0.925448	0.86131	0.919622	0.849283	1.04199	0.977997	1.03963	0.992287	1.02498	0.970666	1.02805	0.974171	0.925479	0.862088	1.02548	1.02381
656	NRAV	DYNLL1-AS1	ASO_G0248008_04	Targeted lncRNA	r8b7p1	0.884693	0.91282	1.03566	0.931974	0.964025	0.980946	0.98804	0.986189	1.00656	1.02807	1.03189	1.05699	0.997854	0.952346	0.989772	0.94071	1.0224	0.974561	1.0144	0.978197	1.05325	0.991292	1.04538	0.991201	1.00898	0.941787	0.997181	0.997812
657	NRAV	DYNLL1-AS1	ASO_G0248008_08	Targeted lncRNA	r8b7p1	0.84319	0.84748	0.916179	0.977705	0.930526	0.94722	0.984511	0.986723	1.04774	1.02452	1.08862	1.06833	0.92277	0.961743	0.915346	0.955498	0.986052	1.007	0.996319	1.00695	0.98305	1.02824	0.989158	1.02766	0.920613	0.968681	1.01249	1.00968
658	NRAV	DYNLL1-AS1	ASO_G0248008_10	Targeted lncRNA	r8b7p1	0.908458	0.90881	0.955305	0.99848	0.992442	0.999315	0.998787	1.00355	1.0142	0.987113	1.03486	0.994676	0.978162	1.00443	0.974364	1.00176	0.974419	0.993019	0.981757	0.993007	0.966365	0.996269	0.970784	0.99572	0.96738	0.998845	1.00918	0.999052
659	EIF3J-DT	EIF3J-AS1	ASO_G0179523_04	Targeted lncRNA	r5b3p3	0.988911	1.10203	0.936806	0.895251	0.979311	0.916108	1.00369	0.982512	1.00561	1.03825	1.02169	1.10717	0.960216	0.899109	0.95369	0.900306	0.970442	0.993147	0.970457	1.0061	0.96633	0.96954	0.97242	0.986985	0.958456	0.906324	1.0038	1.03029
660	EIF3J-DT	EIF3J-AS1	ASO_G0179523_08	Targeted lncRNA	r5b3p3	0.912238	0.965865	0.969054	0.972134	0.977314	0.958214	0.992135	0.994133	0.9822	1.03994	1.05274	1.09764	0.977989	0.96708	0.97586	0.960887	1.01293	1.01521	1.03003	1.03399	0.981541	0.994414	0.989406	1.00146	0.952967	0.942475	1.02542	1.02991
661	EIF3J-DT	EIF3J-AS1	ASO_G0179523_09	Targeted lncRNA	r5b3p3	0.952071	0.884521	0.926137	0.907196	0.953491	0.963402	0.997294	0.997921	0.990939	1.04018	1.06353	1.11645	0.933666	0.937289	0.939727	0.929333	0.991618	0.989255	0.995409	1.00958	0.974661	0.941033	0.981054	0.953183	0.932515	0.901264	1.02427	1.03789
662	EMX2OS	EMX2OS	ASO_G0229847_01	Targeted lncRNA	r1b0p6	0.870802	1.0935	1.00971	0.933272	1.03054	0.999845	1.00755	1.00239	0.934981	1.0152	0.974856	0.993383	1.01698	0.966845	1.01862	0.963127	0.982197	0.961144	0.98957	0.973512	0.978747	0.967147	0.984374	0.966636	1.01426	0.969526	1.00162	0.997149
663	EMX2OS	EMX2OS	ASO_G0229847_02	Targeted lncRNA	r1b0p6	0.864825	0.977166	1.00862	0.940582	0.926825	0.850167	0.980462	0.958779	1.01771	1.07485	1.04267	1.11843	0.959936	0.872322	0.959725	0.874984	1.04273	1.05305	1.03395	1.04142	1.04127	1.06294	1.05211	1.06178	0.980097	0.903417	1.00662	1.0052
664	EMX2OS	EMX2OS	ASO_G0229847_03	Targeted lncRNA	r1b0p6	0.531552	0.596453	0.950356	0.977082	0.829272	0.891716	0.957869	0.973449	1.11833	1.07615	1.17091	1.12714	0.874987	0.931909	0.869311	0.918912	1.04322	1.0464	1.04448	1.05204	1.06761	1.06822	1.07925	1.06698	0.892456	0.934729	1.02293	1.01299
665	EMX2OS	EMX2OS	ASO_G0229847_04	Targeted lncRNA	r1b0p6	0.76243	0.937703	0.928004	0.842904	0.936404	0.916312	0.985269	0.986675	1.12082	1.06727	1.11319	1.15605	0.928561	0.88952	0.925904	0.880184	0.983487	0.959932	0.999319	0.991448	0.974589	0.930665	0.992028	0.942777	0.927947	0.862914	1.02049	1.04097
666	EMX2OS	EMX2OS	ASO_G0229847_05	Targeted lncRNA	r1b0p6	0.41183	0.39567	0.850798	0.896183	0.727209	0.74345	0.926202	0.930496	1.17649	1.17231	1.23035	1.24368	0.755145	0.791333	0.757415	0.790964	1.05086	1.06796	1.05059	1.06364	1.07555	1.08347	1.09323	1.09931	0.824281	0.850648	1.02785	1.02815
667	EMX2OS	EMX2OS	ASO_G0229847_AD_02	Targeted lncRNA	r10b0ADp6	1.07204	1.12258	0.961814	0.944078	0.976464	0.906357	0.98303	0.986927	1.00501	1.04427	1.02152	1.05308	0.965798	0.917474	0.96303	0.924342	0.997208	1.00746	0.994618	1.00431	1.02692	1.01377	1.02897	1.01384	0.982039	0.94072	0.988619	1.00251
668	EMX2OS	EMX2OS	ASO_G0229847_AD_03	Targeted lncRNA	r10b0ADp6	1.00696	1.02126	0.899417	0.981225	1.05986	1.09412	1.02189	1.00915	0.981472	0.96238	1.03852	0.972273	1.00877	1.05408	1.00239	1.05003	0.969278	0.993989	0.985392	0.991982	0.908792	0.997163	0.894997	0.980806	0.928246	1.01152	1.01969	0.983572
669	EMX2OS	EMX2OS	ASO_G0229847_AD_04	Targeted lncRNA	r10b0ADp6	0.879799	0.889602	0.880306	0.905787	0.906067	0.912245	0.981401	0.972696	1.05228	1.05124	1.12664	1.10141	0.896878	0.907622	0.89883	0.902565	1.02642	1.00917	1.01441	1.00559	0.985536	1.02096	0.988386	1.02263	0.889346	0.922264	1.02124	1.00383
670	EMX2OS	EMX2OS	ASO_G0229847_AD_05	Targeted lncRNA	r10b0ADp6	0.933624	0.968426	0.971804	1.13476	0.952041	0.906239	0.989177	0.983737	1.04569	1.06142	1.07858	1.06516	0.964937	0.997995	0.963066	1.005	1.0243	1.1089	1.01894	1.09563	1.01835	1.10608	1.01932	1.10835	0.961375	1.02556	1.01332	1.01743
671	EMX2OS	EMX2OS	ASO_G0229847_AD_06	Targeted lncRNA	r10b0ADp6	0.906534	1.04332	0.910891	0.964458	1.0317	0.987463	1.00077	0.987996	1.0232	1.02648	1.01071	1.0672	0.973149	0.982136	0.962678	0.973992	0.960259	1.01593	0.951363	1.00318	0.956258	1.01068	0.955723	1.01545	0.955938	0.965046	1.00168	1.00233
672	ERVK13-1	ERVK13-1	ASO_G0260565_01	Targeted lncRNA	r15bALLp1	0.970073	0.893064	1.05055	0.988715	0.951306	1.02475	0.999362	1.01111	0.982513	1.01213	0.994177	0.973975	0.991927	1.01301	0.998861	1.00725	1.00924	0.970841	1.01202	0.988758	1.03221	0.972957	1.03202	0.97314	1.01734	1.00256	1.00533	0.997248
673	ERVK13-1	ERVK13-1	ASO_G0260565_02	Targeted lncRNA	r15bALLp1	1.06662	1.05423	0.992745	0.959974	0.998984	0.988412	1.00832	0.996078	0.998727	0.983625	1.00643	0.990319	0.999138	0.968184	0.996582	0.971423	1.00034	0.98742	1.00718	0.991684	0.976472	0.991369	0.97788	0.99102	0.981216	0.974738	1.01559	0.996225
674	ERVK13-1	ERVK13-1	ASO_G0260565_03	Targeted lncRNA	r15bALLp1	0.930349	0.945196	0.968951	0.962645	0.951018	0.961067	0.989568	0.987302	1.07204	1.0287	1.04263	1.02965	0.955368	0.952765	0.951912	0.949757	1.00644	1.003	1.00938	1.00471	1.00658	1.00507	1.01089	1.00636	0.963065	0.960603	1.00618	1.00285
675	ERVK13-1	ERVK13-1	ASO_G0260565_04	Targeted lncRNA	r15bALLp1	0.965404	0.964911	1.0525	1.08847	1.0116	1.04916	1.00912	1.01359	1.0174	0.934492	0.997343	0.940472	1.03464	1.07012	1.03279	1.07368	1.00686	1.01285	1.00934	1.00214	1.00561	1.02775	1.00709	1.01909	1.02222	1.0725	1.00414	0.992153
676	ERVK13-1	ERVK13-1	ASO_G0260565_07	Targeted lncRNA	r15bALLp1	1.00487	1.04215	1.00554	1.06987	0.942097	1.04196	0.985633	1.01221	1.01495	0.987433	1.03054	0.980198	0.969016	1.05934	0.976608	1.06059	1.02296	1.00569	1.02115	1.00301	1.02309	0.996262	1.02174	0.995113	0.983278	1.05239	1.00675	1.00163
677	ERVK13-1	ERVK13-1	ASO_G0260565_AD_02	Targeted lncRNA	r10b0ADp4	1.002	0.931653	0.919553	0.969924	0.905899	0.984611	0.978216	0.991201	1.03142	1.01519	1.06916	1.01766	0.901475	0.977819	0.909187	0.976401	1.00742	1.00018	1.00255	0.992114	0.999815	0.989369	1.0096	0.996062	0.921864	0.983646	1.01051	1.00073
678	ERVK13-1	ERVK13-1	ASO_G0260565_AD_04	Targeted lncRNA	r10b0ADp4	0.938498	0.952708	1.02265	0.997965	1.02876	0.932208	1.00974	0.991792	1.00039	1.01791	1.00865	1.04222	1.03442	0.966506	1.02551	0.967998	1.01463	1.0343	1.00776	1.03365	0.983803	1.01633	0.982646	1.01967	1.01142	0.972268	1.01015	1.01523
679	ERVK13-1	ERVK13-1	ASO_G0260565_AD_06	Targeted lncRNA	r10b0ADp4	0.82083	0.834456	0.95283	0.918552	0.984737	0.948855	0.991707	0.979248	1.04132	1.07889	1.10494	1.12704	0.975392	0.931035	0.960927	0.920092	0.975098	0.97622	0.991441	0.987178	0.996999	0.985895	0.999746	0.990709	0.964136	0.920425	1.01508	1.022
680	ERVK13-1	ERVK13-1	ASO_G0260565_AD_07	Targeted lncRNA	r10b0ADp4	0.903523	0.905929	1.05228	1.05834	1.04162	1.01574	1.00636	1.00453	0.983825	0.998094	0.986707	1.00355	1.0469	1.03887	1.04706	1.03724	1.00688	1.02116	1.00222	1.02353	0.993467	1.01126	0.992718	1.01624	1.02634	1.02273	1.00513	1.01082
681	ERVK13-1	ERVK13-1	ASO_G0260565_AD_08	Targeted lncRNA	r10b0ADp4	0.845294	0.877231	1.03821	1.02405	0.991931	0.961264	1.00528	0.994718	1.00675	1.01763	0.98564	1.05413	1.01654	0.993651	1.02197	1.00272	1.0279	1.04711	1.01095	1.03807	1.01076	1.01401	1.01925	1.01297	1.02852	0.992359	1.00316	1.01479
682	ERVK3-1	ERVK3-1	ASO_G0142396_01	Targeted lncRNA	r1b0p1	1.01657	0.850426	1.04353	0.985348	1.05292	1.06554	1.00614	1.01358	1.01512	0.899293	0.994438	0.982181	1.05294	1.03228	1.04828	1.02544	0.999634	0.970428	1.00151	0.991688	0.993476	0.956549	0.987335	0.953284	1.03677	0.998958	0.999366	1.00932
683	ERVK3-1	ERVK3-1	ASO_G0142396_02	Targeted lncRNA	r1b0p1	1.0341	0.947236	0.962904	1.10397	0.91588	0.916869	0.985097	0.987537	1.07098	1.02209	1.05108	1.05818	0.939827	0.996833	0.942685	0.997738	1.01297	1.07321	1.01745	1.06367	1.01603	1.07482	1.02342	1.07824	0.95128	1.00601	1.00855	1.01682
684	ERVK3-1	ERVK3-1	ASO_G0142396_03	Targeted lncRNA	r1b0p1	1.01228	0.797056	0.873008	0.87769	0.864726	0.916112	0.965992	0.96681	1.082	1.02943	1.13498	1.12012	0.86356	0.897952	0.858794	0.895468	0.983334	0.97024	0.999265	0.983047	1.01297	0.990562	1.02131	1.00426	0.882337	0.901462	1.0127	1.01705
685	ERVK3-1	ERVK3-1	ASO_G0142396_06	Targeted lncRNA	r1b0p1	1.08313	1.00921	1.01944	0.959863	1.0078	1.00075	1.0019	0.998187	1.04269	1.00997	1.03021	1.02354	1.02273	0.985514	1.02258	0.985742	1.01354	0.995874	1.0223	0.995264	0.988671	0.984183	0.991294	0.983605	1.0001	0.969037	1.01433	1.00517
686	ERVK3-1	ERVK3-1	ASO_G0142396_08	Targeted lncRNA	r1b0p1	0.792521	0.864611	0.808312	0.856288	0.756549	0.790839	0.932389	0.945116	1.1474	1.11519	1.22144	1.21693	0.762644	0.807297	0.768958	0.805102	1.02412	1.02916	1.01886	1.0254	1.03511	1.03948	1.05054	1.05137	0.813857	0.839811	1.01617	1.02509
687	ERVK3-1	ERVK3-1	ASO_G0142396_AD_01	Targeted lncRNA	r10b0ADp1	0.46367	0.429223	1.01404	0.977301	0.932387	0.933172	0.96072	0.98006	1.01398	1.01715	1.02321	1.03583	0.94034	0.923159	0.943985	0.923757	1.00042	0.973595	0.978499	0.97084	1.0863	1.02145	1.07379	1.0106	1.01221	0.964544	0.967238	0.981684
688	ERVK3-1	ERVK3-1	ASO_G0142396_AD_02	Targeted lncRNA	r10b0ADp1	0.947631	0.945441	1.01159	1.04333	0.981372	1.03434	0.996773	0.991436	0.973436	0.965951	0.979788	0.966261	0.996373	1.032	0.994346	1.02939	1.01916	1.00593	1.00207	1.00086	1.03762	1.05105	1.02752	1.0458	1.01153	1.0347	0.979626	0.983748
689	ERVK3-1	ERVK3-1	ASO_G0142396_AD_05	Targeted lncRNA	r10b0ADp1	1.02794	0.986752	0.941866	0.978445	0.986127	0.956161	0.988251	0.989273	0.980257	1.00789	1.01998	1.03277	0.965279	0.953244	0.959678	0.950847	0.984776	1.00469	0.99125	1.00706	1.00263	1.03151	0.994819	1.02692	0.965706	0.973787	0.987588	0.997094
690	ERVK3-1	ERVK3-1	ASO_G0142396_AD_07	Targeted lncRNA	r10b0ADp1	0.994765	0.943316	0.957664	1.05333	0.978988	0.940727	0.986879	0.980962	1.00843	1.02337	1.02002	1.03836	0.965268	0.98278	0.962223	0.986018	1.00379	1.06467	0.987001	1.05088	1.01669	1.04638	1.0122	1.04502	0.982989	0.991382	0.985241	1.00551
691	ERVK3-1	ERVK3-1	ASO_G0142396_AD_08	Targeted lncRNA	r10b0ADp1	1.03364	0.987431	0.996014	1.05952	0.983852	1.04384	0.9881	0.997647	0.99889	0.985272	1.00884	0.975203	0.984949	1.04686	0.981444	1.04408	1.01051	1.01804	1.01025	1.01306	1.0329	1.02386	1.03049	1.02054	1.00314	1.04075	0.992216	0.993892
692	FBXL19-AS1	FBXL19-AS1	ASO_G0260852_01	Targeted lncRNA	r3b2p4	0.993017	1.10404	0.889174	0.876525	0.936526	1.01427	0.988655	1.00056	1.04055	0.991376	1.05632	1.01954	0.922969	0.956273	0.918483	0.951025	0.982492	0.95338	0.989315	0.9641	0.975795	0.932775	0.980525	0.944631	0.924979	0.932915	1.00825	1.00394
693	FBXL19-AS1	FBXL19-AS1	ASO_G0260852_02	Targeted lncRNA	r3b2p4	0.937419	0.936924	0.926679	0.930968	0.9957	0.976352	0.999159	0.990864	1.03152	1.02939	1.04741	1.0751	0.966252	0.954489	0.964209	0.951327	0.966347	1.00446	0.984215	1.01014	0.966997	0.972525	0.976225	0.978971	0.94935	0.938233	1.01304	1.01972
694	FBXL19-AS1	FBXL19-AS1	ASO_G0260852_04	Targeted lncRNA	r3b2p4	0.949889	0.963844	0.915029	0.980606	0.983568	1.00703	0.995317	0.996921	1.00549	1.01155	1.06178	1.01794	0.959995	1.00088	0.950233	0.996389	0.976817	0.990597	0.984419	0.99316	0.968445	0.993952	0.975009	0.999316	0.939118	0.999583	1.01397	1.00105
695	FBXL19-AS1	FBXL19-AS1	ASO_G0260852_07	Targeted lncRNA	r3b2p4	0.890445	0.867195	0.896843	0.941856	0.88153	0.891011	0.969316	0.968007	1.071	1.08089	1.14248	1.11037	0.880582	0.893308	0.878777	0.895378	1.02364	1.01565	1.01892	1.00871	0.995404	1.01188	1.00428	1.01702	0.889272	0.921278	1.02126	1.01143
696	FBXL19-AS1	FBXL19-AS1	ASO_G0260852_08	Targeted lncRNA	r3b2p4	0.829411	0.929055	0.978895	0.932162	0.906352	0.889354	0.982019	0.969416	1.0399	1.04696	1.06614	1.08441	0.947334	0.903809	0.95074	0.902679	1.04454	1.01419	1.04318	1.00683	1.02224	1.03485	1.0341	1.04783	0.956124	0.945964	1.01505	1.00167
697	FBXL19-AS1	FBXL19-AS1	ASO_G0260852_AD_01	Targeted lncRNA	r15bALLp5	0.965364	0.991371	1.01071	0.983803	1.02521	1.05864	1.01356	1.00882	0.965292	0.993349	0.957549	0.994174	1.01891	1.03355	1.01954	1.03018	0.978711	0.98377	0.978833	0.990996	0.995261	0.957743	0.996661	0.958242	1.02087	0.994855	0.995725	1.00747
698	FBXL19-AS1	FBXL19-AS1	ASO_G0260852_AD_02	Targeted lncRNA	r15bALLp5	0.886805	1.09578	1.08391	0.94257	1.0376	1.00699	1.01291	0.993502	0.98445	0.99473	0.995409	0.997124	1.06929	0.975699	1.06553	0.968658	1.0178	0.977009	1.01981	0.980957	1.00589	0.978931	1.00207	0.975378	1.03898	0.964005	1.0118	0.993784
699	FBXL19-AS1	FBXL19-AS1	ASO_G0260852_AD_03	Targeted lncRNA	r15bALLp5	0.871107	0.867822	1.00216	1.075	0.9874	1.00114	1.00014	1.00163	0.989551	0.982222	0.99781	1.02129	1.00082	1.05094	0.996282	1.05632	0.995775	1.01409	0.997482	1.02468	1.00264	0.99789	1.00341	1.00228	0.994596	1.03186	1.00116	1.02188
700	FBXL19-AS1	FBXL19-AS1	ASO_G0260852_AD_05	Targeted lncRNA	r15bALLp5	1.13915	1.01791	0.98756	1.01503	1.00986	1.01265	1.00826	0.993044	0.986796	0.984548	0.988408	0.984084	1.00422	1.00601	1.0027	1.0043	0.985057	0.996345	0.98746	0.998105	0.987528	1.03583	0.982704	1.0338	0.995332	1.02258	0.9947	0.985801
701	FBXL19-AS1	FBXL19-AS1	ASO_G0260852_AD_09	Targeted lncRNA	r15bALLp5	0.946385	1.04174	0.944222	0.967366	1.00934	0.991389	1.00332	1.01072	1.02526	0.968851	1.00892	1.00536	0.986044	0.988297	0.976876	0.987903	0.974494	0.98393	0.986213	0.993358	0.961112	0.959971	0.964407	0.970013	0.963805	0.972543	1.00278	1.0167
702	FGD5-AS1	FGD5-AS1	ASO_G0225733_01	Targeted lncRNA	r1b0p6	0.996273	0.937752	1.00776	1.1005	0.99161	0.974009	0.997085	0.986359	1.01022	1.01533	1.00149	1.0069	0.999384	1.03369	0.996288	1.03491	1.00348	1.05615	1.00789	1.04548	1.03197	1.06801	1.02011	1.05969	1.00297	1.04112	0.992145	0.991997
703	FGD5-AS1	FGD5-AS1	ASO_G0225733_02	Targeted lncRNA	r1b0p6	1.05523	1.06079	1.10902	0.929651	1.00003	0.973968	0.995751	0.994717	1.06965	1.03775	0.998908	1.04125	1.04747	0.951786	1.04814	0.950057	1.04452	0.987823	1.03929	0.997899	1.06167	0.975035	1.06124	0.978414	1.06029	0.94546	0.991412	1.01094
704	FGD5-AS1	FGD5-AS1	ASO_G0225733_03	Targeted lncRNA	r1b0p6	0.991797	0.93259	1.01855	0.901653	0.935989	0.94632	0.98413	0.998699	1.01416	1.01273	1.03471	1.08508	0.96308	0.926776	0.965702	0.919631	1.02263	0.971009	1.02036	0.988548	1.02814	0.940668	1.03466	0.947815	0.992294	0.906779	1.01002	1.02841
705	FGD5-AS1	FGD5-AS1	ASO_G0225733_04	Targeted lncRNA	r1b0p6	0.890863	0.917418	1.00059	1.01002	1.00353	0.987355	1.00015	0.992393	1.00207	0.977561	1.03859	1.01826	1.00921	0.996057	1.00567	0.999604	0.997744	1.0157	1.00797	1.01668	0.9872	1.0275	0.987936	1.03151	0.988207	0.997695	1.01778	1.00532
706	FGD5-AS1	FGD5-AS1	ASO_G0225733_05	Targeted lncRNA	r1b0p6	0.988038	1.00852	0.965421	0.988761	1.00483	0.977848	0.997553	0.996026	1.02404	0.995882	1.00943	1.02858	0.993279	0.989692	0.992431	0.991777	0.974558	1.00509	0.981848	1.01552	1.00213	1.00615	1.00744	1.00893	1.00288	0.988073	0.998068	1.00942
707	FGD5-AS1	FGD5-AS1	ASO_G0225733_AD_03	Targeted lncRNA	r10b0ADp6	0.865823	0.839812	0.764954	0.806928	0.843876	0.832398	0.961179	0.971549	1.14632	1.11632	1.25758	1.2358	0.802893	0.815427	0.811672	0.82573	1.00219	1.02947	1.01044	1.0311	0.890076	0.921755	0.908452	0.937858	0.779424	0.806454	1.06624	1.06268
708	FGD5-AS1	FGD5-AS1	ASO_G0225733_AD_04	Targeted lncRNA	r10b0ADp6	1.00683	0.905865	0.980799	1.0254	1.00319	1.0002	0.991043	0.999533	1.01151	1.01895	1.02515	1.0234	0.991801	1.01103	0.985095	1.00666	0.986512	1.01497	0.987374	1.00256	1.02097	1.01674	1.01362	1.02118	0.997326	1.01002	0.993446	1.00262
709	FGD5-AS1	FGD5-AS1	ASO_G0225733_AD_06	Targeted lncRNA	r10b0ADp6	0.72541	0.638268	0.888133	0.9496	0.961729	0.965423	0.990099	0.989247	1.04236	1.06061	1.1175	1.12073	0.928666	0.965261	0.914887	0.943134	0.959587	0.999592	0.978208	1.01283	0.97787	0.998975	0.980321	0.996839	0.904572	0.927784	1.01925	1.02086
710	FGD5-AS1	FGD5-AS1	ASO_G0225733_AD_07	Targeted lncRNA	r10b0ADp6	0.848559	0.835077	0.944817	0.936291	0.987914	0.987114	0.994416	0.984205	1.01268	1.02517	1.04257	1.06672	0.966496	0.96414	0.95277	0.957199	0.987772	0.987743	0.981683	0.986705	1.03041	0.996507	1.02142	0.996237	0.966642	0.951924	0.990439	1.00716
711	FGD5-AS1	FGD5-AS1	ASO_G0225733_AD_08	Targeted lncRNA	r10b0ADp6	0.975834	0.97902	1.05396	0.981902	0.934545	0.997209	0.984059	1.00271	1.03085	0.994039	1.0432	1.04098	0.985551	0.998263	0.983652	0.99326	1.0536	1.00846	1.03979	1.01197	1.07497	0.992826	1.07538	0.993199	1.00536	0.971278	0.999671	1.01765
712	FLVCR1-DT	FLVCR1-AS1	ASO_G0198468_01	Targeted lncRNA	r5b3p4	0.977127	1.06885	0.966002	0.967827	0.9749	1.00925	0.996011	0.991209	1.01271	1.00312	1.04303	1.0207	0.970688	0.993308	0.967674	0.991371	0.989605	0.989712	0.99206	0.987609	0.985054	0.986433	0.980929	0.984184	0.977226	0.984122	1.0148	1.00379
713	FLVCR1-DT	FLVCR1-AS1	ASO_G0198468_03	Targeted lncRNA	r5b3p4	0.917576	0.912195	1.05615	0.990276	0.988206	1.00037	1.00626	1.00557	1.01109	1.00966	1.02193	1.02135	1.0169	1.00395	1.01674	1.00451	1.0098	1.00501	1.02134	1.00967	1.01165	0.977994	1.01688	0.980265	1.01577	0.99008	1.01343	1.0127
714	FLVCR1-DT	FLVCR1-AS1	ASO_G0198468_06	Targeted lncRNA	r5b3p4	0.909365	0.94043	0.929573	0.987583	0.992951	0.990338	0.999463	0.999215	1.02746	0.993317	1.05816	1.02041	0.966054	0.989884	0.959365	0.988395	0.974949	1.00395	0.98873	1.00151	0.943847	0.988584	0.952628	0.995511	0.944145	0.985306	1.01731	1.01445
715	FLVCR1-DT	FLVCR1-AS1	ASO_G0198468_07	Targeted lncRNA	r5b3p4	0.923338	0.911934	0.917377	1.05574	0.951253	1.0177	0.990594	1.00316	1.02281	0.993475	1.02409	1.00343	0.925587	1.05433	0.929874	1.05378	0.965019	1.01678	0.978162	1.02309	0.969115	1.00971	0.980339	1.00944	0.937222	1.03731	1.01534	1.00668
716	FLVCR1-DT	FLVCR1-AS1	ASO_G0198468_09	Targeted lncRNA	r5b3p4	0.954422	0.847201	0.886583	0.989091	0.901685	0.934413	0.983607	0.982533	1.04728	1.01475	1.09021	1.05402	0.885989	0.953527	0.888274	0.95957	0.995318	1.01457	0.997562	1.01388	0.981183	1.02547	0.991871	1.03824	0.90528	0.980972	1.01837	1.01215
717	FOXN3-AS1	FOXN3-AS1	ASO_G0258920_01	Targeted lncRNA	r9b8p1	0.906276	0.9334	0.977494	1.00974	1.02005	1.0501	0.998969	1.0068	0.964394	0.955439	0.95296	0.950272	0.999624	1.03369	1.00687	1.03947	0.9855	0.994527	0.979001	0.989586	1.00782	1.00588	0.999993	1.00426	1.01285	1.02488	0.975162	0.978332
718	FOXN3-AS1	FOXN3-AS1	ASO_G0258920_02	Targeted lncRNA	r9b8p1	1.03095	0.96491	0.895967	0.973349	0.976149	1.01051	0.994408	1.00516	0.995248	1.00867	1.01563	0.992743	0.938576	1.00412	0.937946	0.998791	0.970098	0.987894	0.969771	0.993303	0.979805	0.99141	0.977805	0.990125	0.939219	0.983301	0.995769	0.994319
719	FOXN3-AS1	FOXN3-AS1	ASO_G0258920_03	Targeted lncRNA	r9b8p1	1.01337	0.872016	1.00793	1.00566	0.991696	1.03844	0.992421	1.00195	0.981174	0.955336	0.958677	0.962155	0.993585	1.03459	0.997025	1.03419	1.00557	0.992151	0.993749	0.990444	1.0275	1.03067	1.0219	1.02385	1.01069	1.02883	0.975554	0.980673
720	FOXN3-AS1	FOXN3-AS1	ASO_G0258920_07	Targeted lncRNA	r9b8p1	0.98767	0.877198	0.947479	0.994637	1.04734	1.05207	1.00524	1.00272	0.947922	0.988885	0.946295	1.01071	1.00046	1.03158	0.998933	1.02204	0.955399	0.97949	0.951375	0.984007	0.988568	0.997786	0.977161	0.993083	1.00071	1.0068	0.963734	0.991953
721	FOXN3-AS1	FOXN3-AS1	ASO_G0258920_08	Targeted lncRNA	r9b8p1	-0.113564	-0.190005	0.783133	0.736304	0.90023	0.861593	0.958153	0.9329	1.08833	1.13237	1.12518	1.23697	0.830754	0.781012	0.813356	0.76296	0.873029	0.874506	0.90016	0.911423	0.928994	0.890979	0.937782	0.908677	0.870078	0.790298	1.00155	1.03031
722	FOXN3-AS1	FOXN3-AS1	ASO_G0258920_AD_02	Targeted lncRNA	r11b1ADp5	0.907823	0.932968	1.01547	1.05345	1.04311	1.04966	1.01189	0.998569	0.994035	0.964147	0.974668	0.941556	1.03429	1.03713	1.02886	1.03857	0.981143	0.9942	0.988545	0.97528	0.988052	1.03542	0.977752	1.02505	1.01444	1.05261	0.989981	0.965655
723	FOXN3-AS1	FOXN3-AS1	ASO_G0258920_AD_07	Targeted lncRNA	r11b1ADp5	0.774004	0.792809	0.930606	0.896485	0.996483	0.99618	0.99427	0.979256	1.00989	1.03008	1.01838	1.02746	0.955175	0.937692	0.949604	0.92466	0.948031	0.947447	0.954915	0.948278	0.989329	0.951287	0.979207	0.956167	0.962075	0.937492	0.978221	0.990811
724	FOXN3-AS1	FOXN3-AS1	ASO_G0258920_AD_09	Targeted lncRNA	r11b1ADp5	0.864515	0.938702	0.992941	0.990755	1.04812	1.02985	1.01096	0.99373	0.992918	0.971786	0.999969	0.95839	1.02045	1.00962	1.00704	1.00996	0.978	0.992083	0.980564	0.984744	0.977526	1.02448	0.965441	1.0169	0.987776	1.02282	0.994726	0.975702
725	FOXN3-AS1	FOXN3-AS1	ASO_G0258920_AD_10	Targeted lncRNA	r11b1ADp5	0.863634	0.97881	1.02011	0.959175	1.03514	1.02358	1.00185	1.00154	0.983932	1.01467	0.952933	0.998793	1.02414	0.998149	1.02154	0.988985	0.999899	0.98319	0.996904	0.993544	1.021	0.996445	1.01645	0.991203	1.01849	0.981734	0.984632	0.984452
726	FTX	FTX	ASO_G0230590_01	Targeted lncRNA	r1b0p6	0.886625	0.841079	0.993646	0.930453	0.902921	0.89348	0.977676	0.975539	1.08686	1.04916	1.06381	1.10444	0.933407	0.900885	0.935228	0.899793	1.03533	1.01237	1.02941	1.0214	1.04079	1.01272	1.05166	1.01671	0.964775	0.913847	1.0048	1.0131
727	FTX	FTX	ASO_G0230590_02	Targeted lncRNA	r1b0p6	0.860227	0.892041	0.977149	0.943376	1.04095	1.01999	1.00755	1.0003	1.02039	0.960447	1.00403	1.02584	1.01059	0.993127	1.00236	0.986017	0.966385	0.966718	0.983736	0.982345	0.961334	0.94484	0.962368	0.948529	0.992909	0.968133	1.00841	1.01546
728	FTX	FTX	ASO_G0230590_03	Targeted lncRNA	r1b0p6	0.984364	0.830474	1.0641	1.01743	0.994028	1.05072	0.999481	1.00993	1.02011	0.986026	0.990795	0.982939	1.01977	1.03353	1.01586	1.03591	1.04664	0.973829	1.04024	0.980397	1.05344	0.966539	1.03945	0.968127	1.0248	1.02752	0.994137	1.00523
729	FTX	FTX	ASO_G0230590_05	Targeted lncRNA	r1b0p6	0.972675	0.843029	0.983579	1.06462	0.983162	1.00333	0.988347	0.993797	1.06325	0.996447	1.05305	0.980566	0.979399	1.01527	0.973419	1.01724	1.00638	1.02797	1.01398	1.01502	1.01785	1.04777	1.02106	1.0489	0.972486	1.03912	1.00147	0.997901
730	FTX	FTX	ASO_G0230590_06	Targeted lncRNA	r1b0p6	0.836176	0.832094	0.927839	1.01409	0.936006	0.884466	0.987384	0.969631	1.06001	1.05991	1.10572	1.0791	0.930385	0.925463	0.91924	0.927569	0.996447	1.04898	1.01008	1.0405	0.98161	1.10829	0.990728	1.10489	0.919023	0.968753	1.02158	0.989756
731	FTX	FTX	ASO_G0230590_AD_02	Targeted lncRNA	r10b0ADp6	1.05782	0.946531	1.01356	1.08167	1.01177	1.06931	0.984463	1.01051	1.02056	0.970857	1.02163	0.944639	1.01142	1.07687	1.00925	1.07315	1.00886	1.00381	0.996146	0.996645	1.0054	1.024	1.01154	1.01796	1.01515	1.07046	1.00345	0.991731
732	FTX	FTX	ASO_G0230590_AD_03	Targeted lncRNA	r10b0ADp6	1.01303	1.04266	1.06996	1.07694	0.984555	1.03183	0.992717	1.00659	1.01679	1.00306	1.04886	0.997593	1.01265	1.05971	1.00728	1.05187	1.03717	1.01707	1.02962	1.00985	1.02379	1.02604	1.02867	1.01807	1.00459	1.04856	1.01432	0.997785
733	FTX	FTX	ASO_G0230590_AD_04	Targeted lncRNA	r10b0ADp6	1.04429	0.916581	1.03795	1.03767	1.07952	1.0607	1.00853	1.00114	0.960745	1.0266	0.987568	0.995508	1.0722	1.05688	1.06537	1.04902	0.991301	0.985141	0.992109	0.992186	0.997305	1.00082	0.989214	0.99609	1.04411	1.04164	1.00377	0.998601
734	FTX	FTX	ASO_G0230590_AD_07	Targeted lncRNA	r10b0ADp6	0.891136	0.855836	1.10693	1.07627	1.04071	1.09432	1.00144	1.01972	0.986969	0.969726	1.00302	0.966988	1.06708	1.10607	1.06344	1.09364	1.04063	1.00968	1.02742	1.00661	1.04038	0.998745	1.03305	0.986437	1.05579	1.06065	1.00279	0.998081
735	FTX	FTX	ASO_G0230590_AD_08	Targeted lncRNA	r10b0ADp6	1.05743	1.03269	1.06767	1.06695	0.983201	1.05794	0.998356	1.01383	1.01114	0.978477	1.03719	0.985678	1.02488	1.06883	1.02269	1.06573	1.046	1.01544	1.04334	1.00698	1.04068	0.997234	1.0412	0.995551	1.0201	1.04101	1.01637	1.01414
736	GAS6-DT	GAS6-AS2	ASO_G0272695_01	Targeted lncRNA	r14b9plusp2	0.849646	0.835578	0.963781	0.948891	0.960511	0.95408	0.985525	0.981661	1.03956	1.01143	1.0679	1.04784	0.958027	0.934775	0.949613	0.935741	0.986476	0.994054	0.986747	0.993406	1.00405	0.989707	1.00114	0.990939	0.969218	0.943715	0.998424	1.00536
737	GAS6-DT	GAS6-AS2	ASO_G0272695_02	Targeted lncRNA	r14b9plusp2	0.993004	0.955437	1.03297	1.02224	0.982666	1.04354	0.999363	1.01161	1.01436	1.0037	1.03269	0.978427	1.01092	1.03383	1.0048	1.031	1.02521	0.983484	1.02763	0.988989	0.999389	0.989977	0.999672	0.981633	0.994084	1.02543	1.01798	0.993603
738	GAS6-DT	GAS6-AS2	ASO_G0272695_03	Targeted lncRNA	r14b9plusp2	0.965207	0.995256	1.02726	1.04741	1.00145	1.00737	1.0047	1.01022	0.977697	0.964239	0.986722	0.958337	1.0112	1.02093	1.01143	1.03072	1.00941	1.01944	1.00172	1.0093	1.02618	1.01853	1.02002	1.01422	1.01599	1.03005	0.99675	1.001
739	GAS6-DT	GAS6-AS2	ASO_G0272695_04	Targeted lncRNA	r14b9plusp2	0.946338	1.0008	1.02656	0.996806	0.97447	1.05333	0.991237	1.00961	1.01222	0.967235	1.01812	0.976504	0.986553	1.03265	0.983024	1.02537	1.01648	0.982941	1.01923	0.988608	1.03068	0.99357	1.02753	0.983953	0.992512	1.00669	0.999784	0.989884
740	GAS6-DT	GAS6-AS2	ASO_G0272695_05	Targeted lncRNA	r14b9plusp2	0.961349	0.977766	0.869043	0.958492	0.888029	0.899431	0.979438	0.984899	1.06452	1.04346	1.12712	1.09299	0.871748	0.911639	0.869682	0.911107	0.990309	1.01534	1.00407	1.02486	0.960789	1.00666	0.973136	1.00796	0.867665	0.925037	1.03167	1.02589
741	GS1-124K5.4	GS1-124K5.4	ASO_G0237310_05	Targeted lncRNA	r7b6p1	0.944896	0.908841	1.00764	0.968682	0.992917	1.0536	1.00429	1.00409	0.987784	0.973363	1.00776	1.02083	0.994929	1.00984	0.998072	1.00051	1.00408	0.975152	1.00771	0.98446	1.01183	0.976472	1.01053	0.973276	0.987424	0.983264	0.996187	0.9984
742	GS1-124K5.4	GS1-124K5.4	ASO_G0237310_06	Targeted lncRNA	r7b6p1	0.801553	0.779933	0.98894	0.977064	0.958433	0.943197	0.994103	0.987469	0.99751	1.01977	1.04579	1.08295	0.961401	0.949002	0.95961	0.948892	1.00016	1.01246	1.00789	1.01587	1.00496	1.00982	1.00874	1.01632	0.964701	0.952851	1.01291	1.01834
743	GS1-124K5.4	GS1-124K5.4	ASO_G0237310_07	Targeted lncRNA	r7b6p1	0.721513	0.680065	0.994674	0.92894	0.932287	0.94221	0.98654	0.982342	1.03639	1.01961	1.08498	1.07605	0.956474	0.927319	0.950696	0.924318	1.01138	0.988005	1.01487	0.995242	1.02313	0.987537	1.02578	0.986895	0.965617	0.928158	1.01136	1.00958
744	GS1-124K5.4	GS1-124K5.4	ASO_G0237310_08	Targeted lncRNA	r7b6p1	0.654065	0.684801	0.901372	0.985886	0.909355	0.951328	0.992046	0.987054	1.06343	1.02715	1.13841	1.08787	0.907059	0.962316	0.893266	0.954941	0.989701	1.01097	1.0044	1.02199	0.948978	1.00899	0.957901	1.01639	0.891736	0.953186	1.03571	1.02545
745	GS1-124K5.4	GS1-124K5.4	ASO_G0237310_09	Targeted lncRNA	r7b6p1	0.721758	0.754371	1.06845	1.00884	0.972622	0.959356	0.99396	0.994993	0.98939	1.02686	1.0278	1.06288	1.00172	0.983649	1.00847	0.978142	1.02918	1.01792	1.02463	1.0244	1.04046	1.01524	1.04523	1.01697	1.0134	0.976644	1.01251	1.01408
746	GS1-124K5.4	GS1-124K5.4	ASO_G0237310_AD_02	Targeted lncRNA	r13b3ADp4	0.923096	0.987627	0.94652	1.04422	1.04798	1.01085	1.00426	0.994951	0.993275	1.00037	1.02296	1.00015	1.00026	1.02404	0.994987	1.01772	0.953514	1.01661	0.978662	1.0072	0.925415	1.03755	0.93368	1.02983	0.966308	1.02543	1.01862	0.98273
747	GS1-124K5.4	GS1-124K5.4	ASO_G0237310_AD_03	Targeted lncRNA	r13b3ADp4	0.908221	0.926861	1.02077	1.03359	1.06096	1.04074	1.00733	1.00752	0.979109	1.00591	0.971052	1.02538	1.04659	1.03528	1.03438	1.01772	0.994742	1.00694	0.989877	1.01493	1.00886	0.999506	1.00204	0.99357	1.03202	1.00036	0.991911	1.00289
748	GS1-124K5.4	GS1-124K5.4	ASO_G0237310_AD_05	Targeted lncRNA	r13b3ADp4	0.807145	0.809935	0.964737	1.01959	1.01523	1.02739	1.0061	0.996978	1.00014	0.980391	1.01516	0.986939	0.992697	1.01068	0.984151	0.992356	0.97477	0.988293	0.993598	0.991244	0.975067	1.03548	0.972106	1.02787	0.968796	1.00763	1.00909	0.975919
749	GS1-124K5.4	GS1-124K5.4	ASO_G0237310_AD_08	Targeted lncRNA	r13b3ADp4	0.841536	0.839406	0.991525	0.920663	1.0125	0.998618	0.992776	0.99579	1.00103	1.00483	1.00571	1.04979	1.00206	0.953644	0.990271	0.940562	0.975607	0.95535	0.983165	0.973642	1.01659	0.972605	1.0136	0.969359	1.01046	0.938436	0.98479	1.00277
750	GS1-124K5.4	GS1-124K5.4	ASO_G0237310_AD_10	Targeted lncRNA	r13b3ADp4	0.915765	0.954592	0.984663	0.973583	0.994609	1.0317	0.986889	0.997806	1.00104	1.00879	1.01314	1.02029	0.981319	1.00192	0.969409	0.987886	0.984009	0.977	0.983602	0.990536	1.00047	0.991603	1.00063	0.985946	0.985666	0.980578	0.988255	1.00147
751	OTUD6B-AS1	GS1-251I9.4	ASO_G0253738_01	Targeted lncRNA	r3b2p3	1.14601	0.999851	0.950405	0.996365	1.01886	0.985063	0.997765	0.994047	0.97029	0.97743	0.996631	0.988435	0.989866	0.980733	0.988764	0.981769	0.97823	0.994286	0.987339	0.992921	0.971031	1.029	0.97114	1.02803	0.978397	1.00916	1.00079	0.98844
752	OTUD6B-AS1	GS1-251I9.4	ASO_G0253738_02	Targeted lncRNA	r3b2p3	1.03377	1.09078	0.987646	0.990776	1.05874	0.973668	1.00639	0.999911	1.03545	0.986299	1.03054	1.0258	1.03086	0.970093	1.02605	0.971174	0.982014	0.992358	1.00121	1.005	0.959145	0.996762	0.958951	1.00223	0.984761	0.979773	1.01531	1.01662
753	OTUD6B-AS1	GS1-251I9.4	ASO_G0253738_03	Targeted lncRNA	r3b2p3	0.992469	1.13814	0.959609	0.984925	1.02994	0.971224	1.00587	0.995898	1.01966	1.00893	1.03982	1.01903	1.00821	0.979556	1.00572	0.984823	0.972983	1.01344	0.994707	1.00489	0.985088	1.01264	0.983477	1.00934	0.994307	0.986446	1.00975	1.00059
754	OTUD6B-AS1	GS1-251I9.4	ASO_G0253738_05	Targeted lncRNA	r3b2p3	0.99872	1.05316	0.937055	0.960254	1.02217	1.016	1.0078	1.00631	0.998295	1.03949	1.04777	1.01103	0.983585	0.986072	0.980114	0.985155	0.960204	0.97922	0.981804	0.973015	0.945387	0.968789	0.950274	0.975241	0.950173	0.987641	1.02816	1.00342
755	OTUD6B-AS1	GS1-251I9.4	ASO_G0253738_07	Targeted lncRNA	r3b2p3	1.12029	1.18133	0.97749	1.00535	0.895128	0.92912	0.973212	0.976927	1.0348	1.03031	1.06312	0.996376	0.915286	0.947397	0.924681	0.954776	1.03946	1.03173	1.01559	1.00415	1.05044	1.07224	1.05227	1.0735	0.965024	1.01139	1.00286	0.982339
756	HCG11	HCG11	ASO_G0228223_01	Targeted lncRNA	r1b0p2	1.08291	1.18145	0.943582	0.95411	1.02793	1.03818	1.01127	1.00406	0.965173	0.978729	0.997786	1.00789	0.997812	1.00667	0.994066	0.998267	0.964021	0.97801	0.9766	0.984761	0.935943	0.971074	0.943263	0.972788	0.976956	0.985395	1.01951	0.999809
757	HCG11	HCG11	ASO_G0228223_02	Targeted lncRNA	r1b0p2	1.11438	0.999754	1.01339	0.957595	0.908034	0.928805	0.982233	0.982371	0.993843	1.01658	1.03142	1.04316	0.949747	0.930035	0.959651	0.941534	1.06657	1.02631	1.05299	1.03404	1.08557	1.0333	1.08426	1.03547	0.981541	0.946596	1.00163	1.00367
758	HCG11	HCG11	ASO_G0228223_03	Targeted lncRNA	r1b0p2	1.09836	1.12002	1.00772	1.07777	0.925858	0.830338	0.985811	0.954253	1.01523	1.01947	0.989239	1.02465	0.95698	0.912234	0.956303	0.922862	1.03433	1.09034	1.01564	1.06703	1.07059	1.16721	1.06113	1.16314	0.996419	1.01065	0.973949	0.979933
759	HCG11	HCG11	ASO_G0228223_05	Targeted lncRNA	r1b0p2	0.978909	0.970039	0.960549	0.939444	0.999514	1.05798	0.996631	0.999016	0.997867	0.935536	1.03974	0.976589	0.985556	1.00941	0.983124	1.00304	0.98298	0.947459	0.996982	0.950485	0.982283	0.984186	0.991326	0.981861	0.973365	1.01051	1.01003	0.986107
760	HCG11	HCG11	ASO_G0228223_06	Targeted lncRNA	r1b0p2	0.691726	0.780539	0.989777	1.05916	0.92923	0.951152	0.980327	0.989356	1.02911	1.00062	1.04924	0.999485	0.951472	1.00136	0.95188	1.00122	1.02391	1.05534	1.01984	1.04222	1.06437	1.08689	1.05527	1.08194	0.97308	1.02517	0.994751	0.994446
761	HCG11	HCG11	ASO_G0228223_AD_01	Targeted lncRNA	r10b0ADp2	1.03037	1.03638	1.00713	1.02232	1.01292	0.965298	0.998992	0.995731	0.976704	1.01801	1.0146	1.057	1.0085	0.996331	1.0048	0.990619	0.988634	1.02044	0.99073	1.02953	1.00797	1.03804	0.99842	1.0312	1.00659	0.99738	0.997931	1.01021
762	HCG11	HCG11	ASO_G0228223_AD_07	Targeted lncRNA	r10b0ADp2	0.919056	0.889693	1.06986	1.00252	1.00545	1.00252	1.00236	0.99484	0.993297	0.991762	1.026	1.00852	1.04153	0.996256	1.04072	0.991183	1.03053	0.99368	1.034	0.994284	1.03523	1.01461	1.03174	1.01797	1.02839	0.999761	1.00874	0.997878
763	HCG11	HCG11	ASO_G0228223_AD_08	Targeted lncRNA	r10b0ADp2	0.89044	0.834885	1.05836	1.00204	1.06158	0.997837	1.01314	1.00656	0.992593	0.99442	0.986483	1.04953	1.07395	1.01204	1.07136	1.00789	1.03332	1.00666	1.02684	1.00942	1.01508	0.992597	1.00211	0.986293	1.03595	0.990532	0.994634	1.01621
764	HCG11	HCG11	ASO_G0228223_AD_09	Targeted lncRNA	r10b0ADp2	0.910715	0.855001	0.943363	0.97131	1.00338	0.993557	0.994352	0.994867	0.996834	1.00349	1.01765	1.03076	0.976436	0.983348	0.973199	0.978004	0.960052	0.979575	0.97297	0.994586	0.995175	0.989027	1.0024	0.996911	0.973444	0.978819	0.997337	1.00697
765	HCG11	HCG11	ASO_G0228223_AD_10	Targeted lncRNA	r10b0ADp2	0.91121	0.870691	1.03446	1.0174	0.964924	0.964162	0.994781	0.995686	0.990417	1.0245	0.989514	1.03557	0.992509	0.993818	0.994123	0.987438	1.012	1.01346	1.00121	1.01838	1.06698	1.03307	1.06937	1.03094	1.03299	0.997176	0.987535	1.00513
766	HOXB-AS1	HOXB-AS1	ASO_G0230148_02	Targeted lncRNA	r6b5p1	0.701883	0.653317	0.929278	0.917702	0.982486	0.987098	0.985334	0.991828	1.02711	1.00934	1.01301	1.04372	0.944612	0.947927	0.935135	0.937984	0.951149	0.944062	0.943569	0.950221	1.00235	0.986631	1.00693	0.98748	0.971917	0.956504	0.972234	0.993331
767	HOXB-AS1	HOXB-AS1	ASO_G0230148_05	Targeted lncRNA	r6b5p1	0.747714	0.771118	1.02364	0.915863	0.972505	0.964451	0.996522	0.985649	1.05118	1.04281	1.07358	1.07968	1.00401	0.936482	0.9937	0.921374	1.00989	0.944408	1.01348	0.957806	1.014	0.979737	1.00442	0.996269	0.997246	0.95209	1.01114	1.00388
768	HOXB-AS1	HOXB-AS1	ASO_G0230148_06	Targeted lncRNA	r6b5p1	0.757557	0.694328	0.907813	0.886988	0.985742	0.946727	0.988952	0.97589	1.04528	1.03331	1.10386	1.09961	0.944316	0.908032	0.923484	0.888362	0.952758	0.938339	0.972025	0.954217	0.974736	1.00012	0.984262	1.01346	0.935379	0.923495	1.01171	1.00229
769	HOXB-AS1	HOXB-AS1	ASO_G0230148_07	Targeted lncRNA	r6b5p1	0.652486	0.64889	0.966037	0.829094	0.983301	0.949439	0.990079	0.98481	1.02167	1.05349	1.07935	1.14062	0.974186	0.885546	0.963141	0.868701	0.97352	0.920444	0.980652	0.942675	1.0262	0.926591	1.02603	0.936701	0.974539	0.872824	0.995547	1.0219
770	HOXB-AS1	HOXB-AS1	ASO_G0230148_09	Targeted lncRNA	r6b5p1	0.701091	0.761021	0.949949	0.935404	0.945997	0.999998	0.979768	0.994597	1.04947	1.0087	1.08446	1.05558	0.946234	0.9679	0.930844	0.951036	0.975979	0.938012	0.989565	0.956095	0.998905	0.982833	1.00877	0.981211	0.952966	0.965123	1.0061	0.998176
771	HOXD-AS2	HOXD-AS2	ASO_G0237380_01	Targeted lncRNA	r1b0p3	-0.639688	-0.700374	0.557059	0.553382	0.68197	0.711669	0.891905	0.889974	1.26217	1.22458	1.43647	1.34123	0.586106	0.592605	0.574771	0.579573	0.862688	0.828851	0.903583	0.859359	0.843161	0.852964	0.87667	0.881186	0.625606	0.662697	1.05676	1.02227
772	HOXD-AS2	HOXD-AS2	ASO_G0237380_02	Targeted lncRNA	r1b0p3	1.10752	1.02863	0.974749	1.02829	0.915491	0.976451	0.989323	0.995638	1.0384	1.01223	1.07608	0.999565	0.944404	0.999991	0.944229	0.998884	1.009	1.01449	1.01039	1.01685	1.01983	1.0181	1.02129	1.02232	0.965621	1.00203	1.01536	1.00396
773	HOXD-AS2	HOXD-AS2	ASO_G0237380_04	Targeted lncRNA	r1b0p3	1.23219	0.975075	0.939163	0.956026	0.925257	0.965957	0.99063	0.990282	1.02916	1.00557	1.046	1.03559	0.929175	0.953893	0.934856	0.951573	1.00639	0.990279	1.00193	0.998956	0.990265	1.00601	1.00063	1.00557	0.945	0.97023	1.01446	1.00001
774	HOXD-AS2	HOXD-AS2	ASO_G0237380_05	Targeted lncRNA	r1b0p3	0.929196	1.04994	1.16853	1.01034	1.01131	0.923172	0.999119	0.984534	1.01582	1.01781	0.988255	1.0662	1.0781	0.957946	1.07071	0.954746	1.05742	1.03731	1.05163	1.03135	1.08715	1.03209	1.07927	1.03583	1.09684	0.96867	0.994081	1.0118
775	HOXD-AS2	HOXD-AS2	ASO_G0237380_07	Targeted lncRNA	r1b0p3	1.05803	1.12959	0.936355	0.947907	0.929748	0.949176	0.983383	0.980054	1.05173	1.0387	1.09361	1.07155	0.931646	0.951679	0.924866	0.944843	0.984946	0.994344	1.0005	0.994985	0.983995	1.00071	0.98996	1.01442	0.934838	0.957554	1.01086	1.0082
776	HOXD-AS2	HOXD-AS2	ASO_G0237380_AD_01	Targeted lncRNA	r15bALLp4	1.145	1.03559	0.939885	1.04	1.01575	1.05838	0.986935	0.998864	0.990922	1.0277	0.963897	0.970682	0.973675	1.05604	0.97042	1.05578	0.971004	1.00641	0.961836	0.998769	1.01349	1.01149	1.0048	1.0055	0.993675	1.04483	0.968232	0.985331
777	HOXD-AS2	HOXD-AS2	ASO_G0237380_AD_02	Targeted lncRNA	r15bALLp4	0.83646	0.89631	1.06625	1.04792	1.0301	1.00888	1.00155	0.998973	1.01225	0.991534	0.989951	1.01654	1.04444	1.03296	1.0386	1.02958	1.01117	1.01845	1.00425	1.0205	1.01708	1.00873	1.01723	1.01137	1.04413	1.01795	0.996994	1.01129
778	HOXD-AS2	HOXD-AS2	ASO_G0237380_AD_03	Targeted lncRNA	r15bALLp4	0.769578	0.913971	0.993448	1.00982	0.978709	0.989189	0.989979	0.999301	1.04159	1.02902	1.04356	1.0159	0.984461	0.998805	0.982259	1.00002	1.00806	1.00294	1.0124	1.00728	1.00341	0.999342	1.00499	1.00366	0.977886	0.999642	1.0087	1.00532
779	HOXD-AS2	HOXD-AS2	ASO_G0237380_AD_04	Targeted lncRNA	r15bALLp4	0.936085	0.920358	1.00805	1.04406	1.00327	1.04967	0.994251	1.00734	1.02383	0.984297	1.03452	0.980126	1.00741	1.05901	1.00236	1.05216	1.00978	1.00111	1.01721	1.00522	0.987884	0.996455	0.990747	0.994365	0.983813	1.03863	1.01465	1.00282
780	HOXD-AS2	HOXD-AS2	ASO_G0237380_AD_08	Targeted lncRNA	r15bALLp4	1.12026	1.11775	1.03168	0.98808	1.04861	1.04236	0.990715	0.981364	0.973807	0.947997	0.959303	0.904862	1.02245	1.00408	1.02291	0.995651	1.00401	0.962787	0.983401	0.944729	1.05164	1.05627	1.04307	1.04982	1.04437	1.05326	0.967466	0.939556
781	JPX	JPX	ASO_G0225470_01	Targeted lncRNA	r4b4p3	1.00719	1.14232	0.955002	1.008	0.981287	1.01365	0.992082	0.999931	1.01188	0.969815	0.988212	0.942234	0.962007	0.998874	0.950874	0.993504	0.97551	0.986894	0.970444	0.98191	0.997159	1.01414	0.99217	1.01398	0.968504	1.01416	0.97795	0.973461
782	JPX	JPX	ASO_G0225470_02	Targeted lncRNA	r4b4p3	1.09166	1.01203	1.02252	0.987867	1.01352	1.0542	0.991147	1.01236	0.987347	1.00912	0.966689	1.04342	1.02011	1.03394	1.01873	1.02623	1.00251	1.00457	1.00137	1.02368	1.02986	0.959948	1.02725	0.96362	1.02438	0.976437	0.978086	1.01985
783	JPX	JPX	ASO_G0225470_03	Targeted lncRNA	r4b4p3	0.987258	0.962729	0.980157	0.99677	1.02924	0.992722	0.999603	0.998303	0.958967	1.00908	0.98083	1.02092	1.00411	0.986945	0.992183	0.97788	0.974706	0.992297	0.973854	1.00348	0.983927	1.01232	0.975599	1.00714	0.986066	0.986443	0.986567	0.995769
784	JPX	JPX	ASO_G0225470_04	Targeted lncRNA	r4b4p3	1.04593	1.12554	1.04006	0.997227	1.02257	1.0027	0.995005	0.999621	1.01711	0.99737	1.02915	1.01855	1.01707	1.00179	1.01058	1.00263	1.02714	1.01847	1.02511	1.01939	1.02049	0.991377	1.01743	0.998369	0.998623	0.978476	0.999558	1.00903
785	JPX	JPX	ASO_G0225470_05	Targeted lncRNA	r4b4p3	0.883014	0.960883	0.949172	1.02014	1.04615	1.00839	1.00886	1.00276	0.988604	1.02699	0.97768	1.02363	1.00187	1.02289	0.989212	1.01583	0.96594	1.00704	0.974263	1.01261	0.9711	0.999301	0.963737	1.00008	0.98068	0.999965	0.981741	1.00965
786	JPX	JPX	ASO_G0225470_AD_03	Targeted lncRNA	r13b3ADp2	0.926206	0.988144	0.979781	0.933389	0.933547	0.939552	0.989252	0.980075	1.02484	1.03332	1.04528	1.05325	0.951122	0.927672	0.950645	0.9319	1.00426	0.982757	1.00632	0.98613	1.01788	0.979347	1.02541	0.991439	0.978056	0.940833	1.00679	1.01109
787	JPX	JPX	ASO_G0225470_AD_04	Targeted lncRNA	r13b3ADp2	0.852474	0.90142	1.00782	0.976345	1.05163	0.975452	1.00231	0.989676	0.992115	1.00868	1.01181	1.0233	1.04076	0.969071	1.02435	0.963859	0.993088	1.00277	0.997775	1.00185	0.993384	1.02338	0.992786	1.02127	1.00927	0.970344	0.995309	0.987319
788	JPX	JPX	ASO_G0225470_AD_05	Targeted lncRNA	r13b3ADp2	0.806662	0.813714	1.01461	1.00417	0.987819	1.01512	1.0012	1.00936	1.01953	1.00151	1.00378	1.00395	0.99794	1.01737	0.997696	1.01053	1.00686	1.00294	1.00326	1.0095	1.00474	0.983886	1.01115	0.985221	1.00099	0.990073	0.999376	1.00893
789	JPX	JPX	ASO_G0225470_AD_09	Targeted lncRNA	r13b3ADp2	0.854332	0.892833	1.0433	1.0581	0.996118	0.959337	0.986933	0.987366	1.02481	1.01138	1.05662	1.01845	1.01038	0.998197	1.00076	1.00023	1.02463	1.0417	1.0271	1.03277	1.05775	1.07513	1.05846	1.07567	1.00997	1.02359	0.999263	0.990581
790	JPX	JPX	ASO_G0225470_AD_10	Targeted lncRNA	r13b3ADp2	0.861768	0.878191	1.03961	0.994379	1.03393	0.966439	1.00476	0.983738	0.981517	1.01717	0.967904	1.01363	1.04141	0.978224	1.03263	0.978925	1.01341	1.01392	1.00954	1.02024	1.01885	1.0341	1.01503	1.04221	1.02719	0.996043	0.986008	0.997152
791	KANSL1-AS1	KANSL1-AS1	ASO_G0214401_01	Targeted lncRNA	r4b4p1	1.0196	1.12444	0.983654	1.00266	0.98991	0.991541	0.996433	1.00106	0.997619	1.00296	0.961122	1.02135	0.981522	0.996904	0.992373	0.996576	0.993962	1.01995	0.984706	1.01209	1.02348	1.00158	1.02267	0.997427	1.01347	0.99451	0.980487	1.00678
792	KANSL1-AS1	KANSL1-AS1	ASO_G0214401_02	Targeted lncRNA	r4b4p1	1.04295	0.982691	0.996614	1.07579	0.940585	0.963784	0.985246	0.989158	1.04036	1.03701	1.03623	1.08511	0.953121	1.01364	0.958627	1.01088	1.02288	1.0658	1.0151	1.0648	1.01846	1.0406	1.01881	1.04645	0.975718	1.01213	1.00695	1.02779
793	KANSL1-AS1	KANSL1-AS1	ASO_G0214401_03	Targeted lncRNA	r4b4p1	1.01333	0.927292	0.987247	1.00473	1.02216	0.959786	1.00221	0.99211	0.983508	1.0193	0.935373	1.05376	0.989082	0.979714	0.991503	0.976526	0.978076	1.01867	0.965283	1.01136	0.997646	1.02089	1.00415	1.02338	1.01686	0.989716	0.975085	1.00741
794	KANSL1-AS1	KANSL1-AS1	ASO_G0214401_06	Targeted lncRNA	r4b4p1	1.00489	0.934896	0.98797	1.00021	1.00226	0.939557	0.995257	0.983709	0.998146	1.02229	1.00098	1.00862	0.996043	0.958997	0.99263	0.961178	0.996827	1.0201	0.994067	1.01174	1.00182	1.04178	1.00201	1.04826	0.998196	0.997553	0.999914	0.996876
795	KANSL1-AS1	KANSL1-AS1	ASO_G0214401_10	Targeted lncRNA	r4b4p1	1.05037	1.01295	1.14702	1.08597	1.02367	0.996741	1.00183	1.00043	1.00647	0.988252	0.937554	0.983707	1.07097	1.02513	1.08084	1.03021	1.04525	1.05753	1.01997	1.03691	1.0736	1.05107	1.06732	1.05285	1.11274	1.04116	0.976662	1.00167
796	KTN1-AS1	KTN1-AS1	ASO_G0186615_03	Targeted lncRNA	r5b3p4	1.12662	1.03724	0.957764	1.05163	1.01409	0.963612	0.995651	0.998819	0.987417	1.02379	0.95824	1.04674	0.990402	0.995742	0.991753	0.996471	0.977346	1.04568	0.968233	1.042	1.01086	1.02335	1.00254	1.02392	1.01066	0.998366	0.969784	1.01202
797	KTN1-AS1	KTN1-AS1	ASO_G0186615_04	Targeted lncRNA	r5b3p4	0.846637	1.01227	0.877018	0.939093	0.996945	0.956088	0.976839	0.986833	0.9984	1.04279	1.01486	1.04598	0.928586	0.944613	0.921698	0.953259	0.931776	1.00869	0.929321	1.00686	0.96734	1.00305	0.958266	0.999632	0.938756	0.95081	0.960816	1.00554
798	KTN1-AS1	KTN1-AS1	ASO_G0186615_06	Targeted lncRNA	r5b3p4	0.917894	0.953421	0.851976	1.08796	0.954626	0.967195	0.974004	1.00183	1.01519	1.0308	1.02694	1.00372	0.890866	1.01938	0.887452	1.02562	0.945399	1.05001	0.933044	1.03748	0.996248	1.04921	0.987388	1.0442	0.915646	1.03464	0.967044	1.00071
799	KTN1-AS1	KTN1-AS1	ASO_G0186615_09	Targeted lncRNA	r5b3p4	0.885382	0.999993	0.974959	1.08832	0.970883	0.966386	0.996566	0.997342	0.992139	1.02053	1.02211	1.01208	0.960987	1.01659	0.961395	1.01838	0.992584	1.05418	0.995211	1.04754	1.00426	1.05341	0.986165	1.05172	0.964609	1.02766	0.993593	1.00265
800	KTN1-AS1	KTN1-AS1	ASO_G0186615_10	Targeted lncRNA	r5b3p4	1.05857	0.975158	0.887121	0.928568	0.997949	0.967353	0.987787	0.998779	0.981952	1.00892	0.976968	1.02671	0.932173	0.94958	0.92437	0.950852	0.950055	0.973302	0.943394	0.976616	1.00992	0.967923	0.991038	0.978066	0.949014	0.957691	0.952731	1.00653
801	CYTOR	LINC00152	ASO_G0222041_01	Targeted lncRNA	r1b0p5	0.84729	0.727783	0.905923	1.00887	0.981313	0.992073	0.995476	0.994423	1.02269	1.01715	1.04949	1.01243	0.949773	1.00195	0.944935	0.998457	0.971539	1.01399	0.982737	1.01336	0.947073	1.00245	0.949095	1.00956	0.932777	1.00082	1.01414	1.00432
802	CYTOR	LINC00152	ASO_G0222041_02	Targeted lncRNA	r1b0p5	-0.275281	-0.381457	0.66401	0.700227	0.747729	0.765798	0.926771	0.932534	1.20608	1.17353	1.34727	1.30074	0.689935	0.717899	0.674599	0.704938	0.898719	0.925156	0.94057	0.943819	0.898482	0.92885	0.918369	0.942406	0.704701	0.746032	1.04453	1.03239
803	CYTOR	LINC00152	ASO_G0222041_03	Targeted lncRNA	r1b0p5	0.635309	0.659608	0.91826	1.02021	0.855058	0.835479	0.972157	0.963685	1.08796	1.1166	1.16677	1.12775	0.886703	0.908998	0.882354	0.909979	1.02862	1.07994	1.03917	1.07313	1.00741	1.09847	1.01626	1.10077	0.884502	0.948824	1.02946	1.01738
804	CYTOR	LINC00152	ASO_G0222041_04	Targeted lncRNA	r1b0p5	-0.462561	-0.414109	0.710798	0.739238	0.754575	0.724858	0.914808	0.923736	1.17063	1.18734	1.2395	1.26981	0.700426	0.693441	0.689271	0.686421	0.920591	0.964691	0.9382	0.967733	0.969948	0.988931	0.99192	1.00125	0.759138	0.756103	1.00393	1.0159
805	CYTOR	LINC00152	ASO_G0222041_06	Targeted lncRNA	r1b0p5	0.742436	0.753408	0.815298	0.925657	0.774347	0.805092	0.895591	0.91583	1.17102	1.14148	1.34661	1.27745	0.770574	0.837402	0.776028	0.842293	1.01406	1.05669	1.00957	1.04428	0.976652	1.02472	0.990705	1.03863	0.810127	0.878102	1.04859	1.03899
806	CYTOR	LINC00152	ASO_G0222041_AD_01	Targeted lncRNA	r10b0ADp5	1.07811	1.03015	0.942349	1.01738	0.94206	1.03811	0.984109	1.00735	1.00129	1.01902	1.01819	0.949491	0.937065	1.03242	0.94472	1.03048	0.988367	0.990078	0.981678	0.980353	0.99775	1.00261	0.998532	0.99901	0.955631	1.03961	0.995114	0.97426
807	CYTOR	LINC00152	ASO_G0222041_AD_06	Targeted lncRNA	r10b0ADp5	1.00166	1.00895	1.00483	0.956375	0.928173	1.06869	0.985049	1.01804	1.0448	0.986214	1.09784	0.95653	0.964951	1.0256	0.966624	1.02007	1.03055	0.936426	1.04229	0.941149	1.01322	0.935031	1.02137	0.938098	0.961742	1.01484	1.0297	0.993603
808	CYTOR	LINC00152	ASO_G0222041_AD_07	Targeted lncRNA	r10b0ADp5	1.01776	0.976344	0.951283	1.00531	0.959979	1.00452	0.994888	0.994198	1.03864	1.03507	1.03528	0.988545	0.949337	1.00544	0.943817	1.01131	0.988234	1.00292	0.992676	0.999483	1.00794	0.998403	1.0041	1.00846	0.954014	1.01119	0.997959	0.993812
809	CYTOR	LINC00152	ASO_G0222041_AD_08	Targeted lncRNA	r10b0ADp5	1.006	1.00529	0.927067	0.985837	0.986807	1.00403	0.993757	0.993597	1.02161	1.03917	1.04864	1.04303	0.963896	1.0009	0.961931	1.00145	0.985258	0.983241	0.983797	0.986452	0.951735	0.964699	0.960768	0.970851	0.945447	0.986842	1.01125	1.01089
810	CYTOR	LINC00152	ASO_G0222041_AD_10	Targeted lncRNA	r10b0ADp5	1.01059	1.02229	1.03781	0.985144	0.962405	1.05927	0.995704	1.01544	1.03625	0.989138	1.00069	0.986885	0.993621	1.03775	0.999395	1.02802	1.01724	0.966937	1.00782	0.975742	1.01146	0.962444	1.0152	0.958923	1.01007	1.01381	1.00503	1.00013
811	OLMALINC	LINC00263	ASO_G0235823_01	Targeted lncRNA	r6b5p5	0.87178	0.964359	0.970236	0.992149	1.00884	1.05316	0.984086	0.997471	0.986066	0.976841	0.956628	0.980526	0.977441	1.02957	0.957538	1.02537	0.947946	0.993743	0.944117	0.987339	1.03724	1.03716	0.997306	1.02634	0.991686	1.02486	0.941467	0.971182
812	OLMALINC	LINC00263	ASO_G0235823_03	Targeted lncRNA	r6b5p5	0.90292	0.930698	0.919546	0.945389	1.03267	1.00675	0.991477	0.995141	0.992212	1.00194	0.976155	1.00598	0.966543	0.969903	0.95044	0.956175	0.920193	0.954947	0.925723	0.954802	0.9786	1.01576	0.95981	1.01345	0.970463	0.98442	0.959053	0.974666
813	OLMALINC	LINC00263	ASO_G0235823_06	Targeted lncRNA	r6b5p5	0.710987	0.772675	0.847174	0.95595	0.986332	1.0674	0.967087	0.998517	1.04186	0.963925	1.06685	0.973773	0.904062	1.01914	0.872307	1.00109	0.872344	0.93798	0.884223	0.939741	0.9806	0.98994	0.969067	0.977857	0.930016	0.9991	0.968736	0.965743
814	OLMALINC	LINC00263	ASO_G0235823_07	Targeted lncRNA	r6b5p5	0.8725	0.890212	0.86178	0.907881	1.06209	1.06148	1.00093	1.01037	0.968673	0.99228	0.987338	1.01797	0.960514	0.993034	0.943587	0.974551	0.895261	0.9305	0.913874	0.948652	0.933209	0.943061	0.913872	0.933911	0.928084	0.948417	0.969917	0.992207
815	OLMALINC	LINC00263	ASO_G0235823_10	Targeted lncRNA	r6b5p5	0.88394	0.933031	1.00439	0.953806	1.07929	1.03133	0.99725	1.00118	0.951746	1.01602	0.928265	1.02428	1.03833	0.994967	1.01216	0.988239	0.922051	0.980209	0.929777	0.986391	1.03938	0.971035	1.01093	0.970115	1.05185	0.974907	0.943048	1.00952
816	OLMALINC	LINC00263	ASO_G0235823_AD_01	Targeted lncRNA	r15bALLp5	0.950809	0.900574	0.910991	0.992749	0.984594	0.996784	0.991795	0.994211	1.02006	1.02238	1.00177	1.01153	0.947836	0.996613	0.938809	0.9918	0.957143	0.999658	0.965426	1.00146	0.967054	0.99963	0.970597	1.00611	0.943844	0.989596	0.988781	1.00154
817	OLMALINC	LINC00263	ASO_G0235823_AD_04	Targeted lncRNA	r15bALLp5	0.901789	0.852605	0.948032	1.07607	0.982528	1.00912	1.00689	1.00997	0.994457	0.998415	1.01116	1.00667	0.973872	1.04455	0.970861	1.04437	0.974374	1.01598	0.990473	1.02336	0.964503	1.00429	0.963778	1.0052	0.950927	1.02486	1.00981	1.01459
818	OLMALINC	LINC00263	ASO_G0235823_AD_06	Targeted lncRNA	r15bALLp5	0.817791	0.931953	1.04098	1.05852	1.02706	1.01773	1.01331	1.00842	1.00423	0.999818	1.00575	0.97606	1.04791	1.04671	1.04295	1.04442	1.00172	1.01175	1.00999	1.0098	0.974997	1.01797	0.975932	1.01513	1.01312	1.04054	1.01595	0.999536
819	OLMALINC	LINC00263	ASO_G0235823_AD_08	Targeted lncRNA	r15bALLp5	1.08244	0.955197	0.935652	0.943529	0.989773	0.984353	1.0041	1.00493	1.0127	1.03122	0.999081	1.0248	0.959063	0.968845	0.958516	0.957698	0.96398	0.975362	0.970512	0.989338	0.970819	0.958643	0.972923	0.958446	0.962387	0.946465	0.998429	1.01229
820	OLMALINC	LINC00263	ASO_G0235823_AD_10	Targeted lncRNA	r15bALLp5	1.01694	0.95935	0.982992	1.01182	0.989211	1.00815	1.00055	0.999275	0.981702	0.963031	1.00992	0.98066	0.984241	1.01196	0.982847	1.01436	1.00595	1.01138	1.0058	1.00201	0.997358	1.01634	0.998298	1.01517	0.980963	1.01517	1.00642	0.997626
821	LINC00339	LINC00339	ASO_G0218510_01	Targeted lncRNA	r1b0p1	0.826456	0.932994	0.991869	0.956562	0.986073	0.931173	0.994407	0.98772	1.03427	0.980535	1.04994	1.05111	0.996966	0.94983	0.99432	0.947181	1.00443	0.99336	1.01384	1.00223	0.990212	1.01133	0.990873	1.0156	0.982159	0.957938	1.00999	1.00358
822	LINC00339	LINC00339	ASO_G0218510_02	Targeted lncRNA	r1b0p1	1.15182	0.970759	1.0194	0.989777	0.988838	0.971815	0.999863	0.992202	1.04421	1.00127	1.00019	1.01546	1.00553	0.987314	1.01052	0.987889	1.02216	1.02032	1.02049	1.01556	1.00524	1.02403	1.00872	1.01909	1.00285	0.988768	1.007	1.00007
823	LINC00339	LINC00339	ASO_G0218510_03	Targeted lncRNA	r1b0p1	0.77267	0.723868	0.922872	0.973299	0.864373	0.941033	0.966861	0.99482	1.09725	1.02911	1.16418	1.08184	0.884297	0.95768	0.880266	0.956058	1.00578	0.995928	1.02259	1.01141	1.01307	0.993367	1.02127	0.996958	0.89578	0.951852	1.02656	1.023
824	LINC00339	LINC00339	ASO_G0218510_04	Targeted lncRNA	r1b0p1	0.954381	0.91325	0.969595	0.900721	0.918326	0.934835	0.983704	0.989304	1.0034	1.02692	1.07018	1.09662	0.937869	0.924489	0.94418	0.918992	1.02521	0.981612	1.02685	1.00823	1.01673	0.962831	1.02462	0.966653	0.948588	0.90656	1.01839	1.02456
825	LINC00339	LINC00339	ASO_G0218510_05	Targeted lncRNA	r1b0p1	0.922809	1.01292	0.877765	0.968836	0.938176	0.910985	0.978977	0.983032	1.05419	1.03085	1.04984	1.06885	0.903912	0.942386	0.897378	0.94116	0.971024	1.01009	0.981591	1.02176	0.997926	1.03088	1.00287	1.0361	0.911194	0.950101	0.997926	1.00954
826	LINC00339	LINC00339	ASO_G0218510_AD_03	Targeted lncRNA	r10b0ADp1	0.389169	0.251716	0.869543	0.933353	0.880008	0.879946	0.951933	0.951613	1.05852	1.05152	1.09961	1.12203	0.839284	0.878506	0.8334	0.878798	0.97147	1.00024	0.956597	0.987438	0.985815	1.02659	0.994789	1.02778	0.898883	0.932882	0.988427	0.996333
827	LINC00339	LINC00339	ASO_G0218510_AD_05	Targeted lncRNA	r10b0ADp1	0.867811	0.663286	0.995515	0.895336	0.938146	0.940175	0.983123	0.969601	1.01181	1.06265	1.06563	1.13911	0.962044	0.907129	0.957516	0.902609	1.02773	0.976853	1.0146	0.987976	1.03534	0.979127	1.03781	0.986563	0.976446	0.906777	1.00457	1.01481
828	LINC00339	LINC00339	ASO_G0218510_AD_06	Targeted lncRNA	r10b0ADp1	0.65312	0.605291	0.980557	0.941539	0.994229	1.00977	0.99382	1.00154	1.01326	1.01046	1.085	1.09596	0.9895	0.98281	0.983979	0.964298	1.00863	0.975114	1.01368	0.993937	0.982106	0.964491	0.984712	0.954761	0.961194	0.943316	1.02028	1.01855
829	LINC00339	LINC00339	ASO_G0218510_AD_09	Targeted lncRNA	r10b0ADp1	0.920421	0.921991	1.13525	1.12295	0.99778	0.996543	0.992557	0.993131	0.948171	0.986481	0.928548	0.941651	1.0404	1.04701	1.04801	1.05249	1.0585	1.06357	1.03345	1.03109	1.12876	1.08462	1.11846	1.07627	1.09419	1.08009	0.959598	0.976165
830	LINC00339	LINC00339	ASO_G0218510_AD_10	Targeted lncRNA	r10b0ADp1	0.870543	0.900969	1.03387	0.940428	1.00631	1.01479	1.0033	0.998915	0.966551	0.996714	0.997196	1.04041	1.02072	0.985188	1.02028	0.973521	1.00204	0.964366	1.00782	0.98036	1.03163	0.9465	1.02815	0.946347	1.02975	0.958327	1.0013	1.0148
831	LINC00467	LINC00467	ASO_G0153363_02	Targeted lncRNA	r5b3p3	1.16222	1.00297	0.923551	0.964054	0.917993	0.909765	0.975189	0.982121	1.00476	1.00557	1.02258	1.02132	0.905794	0.921671	0.913006	0.926123	0.997868	1.01967	0.989329	1.0133	1.0061	1.02167	1.00498	1.03097	0.938676	0.963817	0.993618	1.00273
832	LINC00467	LINC00467	ASO_G0153363_03	Targeted lncRNA	r5b3p3	1.14506	0.953405	0.886863	0.879616	1.00065	0.913537	1.00032	0.978077	0.983146	1.04199	1.02278	1.06271	0.95549	0.887097	0.948297	0.883607	0.97406	0.974243	0.971048	0.983201	0.978578	0.983864	0.96798	0.988334	0.936683	0.902684	0.977673	1.00723
833	LINC00467	LINC00467	ASO_G0153363_05	Targeted lncRNA	r5b3p3	1.02004	1.01935	0.853771	0.985842	0.94576	0.868649	0.990031	0.965793	1.01205	1.04696	1.05287	1.09232	0.897662	0.908004	0.898202	0.91846	0.972106	1.07488	0.974569	1.04992	0.963733	1.06325	0.961571	1.07463	0.890133	0.948534	0.990312	1.01094
834	LINC00467	LINC00467	ASO_G0153363_08	Targeted lncRNA	r5b3p3	1.08611	1.07008	0.966333	0.926866	1.03255	0.977356	1.00146	0.989545	0.951004	1.00135	0.972656	1.03436	0.988408	0.958142	0.986273	0.952754	1.00463	0.971372	0.997971	0.974084	1.01416	0.963531	1.00191	0.97826	0.98018	0.962277	0.980178	1.00631
835	LINC00467	LINC00467	ASO_G0153363_09	Targeted lncRNA	r5b3p3	0.932618	1.08401	0.900532	0.852863	0.978229	0.894939	0.987159	0.973355	1.00297	1.06355	1.04284	1.12457	0.936042	0.876846	0.934293	0.881162	0.99214	1.0085	0.984839	1.01326	0.966435	0.948724	0.962649	0.961396	0.91885	0.867252	0.994726	1.03187
836	SMIM26	LINC00493	ASO_G0232388_03	Targeted lncRNA	r6b5p6	0.895516	0.925938	0.93489	0.92921	0.992548	0.981416	0.998535	0.991936	1.03802	1.00649	1.04016	1.00601	0.96501	0.948371	0.960029	0.94696	0.961096	0.974623	0.981212	0.971653	0.97588	1.0104	0.977938	1.00888	0.958156	0.958098	1.01144	0.977737
837	SMIM26	LINC00493	ASO_G0232388_04	Targeted lncRNA	r6b5p6	0.708013	0.79774	0.957564	1.03236	1.03803	1.07001	0.995706	1.0028	1.01734	0.983334	1.05541	1.04525	0.995106	1.052	0.981575	1.04323	0.954381	0.991669	0.97617	0.99985	0.957371	0.986019	0.956744	0.972194	0.952186	1.01228	1.0114	1.01611
838	SMIM26	LINC00493	ASO_G0232388_05	Targeted lncRNA	r6b5p6	0.725686	0.751975	0.8855	0.846979	0.972051	0.921873	0.981505	0.974996	1.06882	1.08035	1.14847	1.16008	0.92682	0.882763	0.905474	0.866659	0.945676	0.942427	0.975536	0.977696	0.960208	0.959327	0.966477	0.96245	0.894319	0.864337	1.02485	1.02906
839	SMIM26	LINC00493	ASO_G0232388_06	Targeted lncRNA	r6b5p6	0.748627	0.754415	0.906911	0.845319	0.926784	0.910575	0.98091	0.983906	1.06283	1.08326	1.12702	1.14992	0.916534	0.872694	0.915842	0.863589	0.985241	0.960322	1.00178	0.98416	0.993767	0.95412	0.997774	0.967052	0.913855	0.8602	1.01995	1.02242
840	SMIM26	LINC00493	ASO_G0232388_07	Targeted lncRNA	r6b5p6	0.758794	0.747205	0.797451	0.925265	0.91648	0.941587	0.968161	0.976921	1.08788	1.03679	1.17733	1.08865	0.852064	0.922077	0.836447	0.922819	0.930196	0.992449	0.946699	0.991051	0.920349	1.02272	0.931245	1.02399	0.834137	0.929795	1.01707	0.994357
841	SMIM26	LINC00493	ASO_G0232388_AD_02	Targeted lncRNA	r12b2ADp3	1.05294	1.02474	0.964321	0.958378	0.959216	1.00238	0.996306	1.00368	1.01869	0.981054	1.03601	1.01341	0.96471	0.984985	0.9696	0.982846	1.01017	0.98199	1.00999	0.980925	0.992655	0.969199	0.994087	0.975807	0.972747	0.984871	1.009	1.0073
842	SMIM26	LINC00493	ASO_G0232388_AD_03	Targeted lncRNA	r12b2ADp3	0.991515	0.945863	0.968829	1.00693	0.970561	0.953515	0.994747	0.996954	1.006	1.03523	1.0196	1.08794	0.967676	0.985869	0.97046	0.987209	0.998359	1.04063	0.991803	1.03838	1.0062	1.0056	1.00426	1.00132	0.983173	0.962144	0.991632	1.02492
843	SMIM26	LINC00493	ASO_G0232388_AD_04	Targeted lncRNA	r12b2ADp3	0.98334	0.950627	1.07425	0.901259	1.01893	0.98497	1.01692	0.99889	0.964073	1.02397	1.00002	1.08932	1.07028	0.959744	1.06963	0.958507	1.02781	0.969642	1.03697	0.989785	0.995224	0.932701	0.995203	0.93904	1.03968	0.932906	1.02232	1.03508
844	SMIM26	LINC00493	ASO_G0232388_AD_08	Targeted lncRNA	r12b2ADp3	0.960788	0.997722	0.980287	0.855331	0.954211	0.989968	0.994793	0.997607	1.00772	1.00927	1.01543	1.04168	0.981007	0.924476	0.983146	0.914693	1.01033	0.93981	1.00281	0.94755	1.01104	0.9411	1.01316	0.937049	1.00554	0.915251	1.00313	0.996856
845	SMIM26	LINC00493	ASO_G0232388_AD_09	Targeted lncRNA	r12b2ADp3	1.05302	1.03134	1.01155	0.965872	1.00015	0.969816	1.01312	0.99545	1.00906	1.03743	0.99549	1.07679	1.02264	0.980986	1.02501	0.97872	0.993791	1.00802	1.00885	1.01647	0.977022	0.982278	0.976251	0.991456	1.00512	0.96278	1.00888	1.02451
846	LINC00511	LINC00511	ASO_G0227036_01	Targeted lncRNA	r4b4p4	0.98404	0.999012	1.00723	1.03625	1.04522	1.01134	1.01024	1.01127	0.986745	0.983679	0.980787	1.01291	1.02959	1.01981	1.03083	1.01351	0.986557	1.00939	0.993417	1.00447	0.979189	0.987719	0.976525	0.976809	0.99963	1.0055	1.00164	1.00923
847	LINC00511	LINC00511	ASO_G0227036_02	Targeted lncRNA	r4b4p4	0.933463	0.930342	1.05484	1.02916	0.984349	0.98466	0.998647	0.988286	1.0492	1.02479	1.0814	1.03214	1.02805	0.995005	1.0275	0.9942	1.033	1.03729	1.04203	1.02557	1.00987	1.02854	1.01143	1.03003	1.00408	0.984613	1.02994	1.00876
848	LINC00511	LINC00511	ASO_G0227036_03	Targeted lncRNA	r4b4p4	0.989236	0.906702	0.985309	1.01692	0.979618	0.99405	0.996569	1.00425	1.01111	1.01307	1.06352	1.03428	0.979323	1.00634	0.978385	0.999362	0.997876	1.00846	0.992883	1.01318	0.987988	0.990487	0.994867	0.995264	0.97992	0.988871	1.02225	1.01382
849	LINC00511	LINC00511	ASO_G0227036_04	Targeted lncRNA	r4b4p4	0.947241	0.870437	0.950023	0.993981	1.03346	0.987437	1.00144	0.993557	1.0449	1.00513	1.06625	1.04586	1.01252	0.991459	1.00525	0.987768	0.974909	1.00464	0.991242	1.01634	0.954095	0.987248	0.943329	0.990811	0.95995	0.980898	1.01719	1.02271
850	LINC00511	LINC00511	ASO_G0227036_08	Targeted lncRNA	r4b4p4	0.924886	0.950633	0.95276	0.979374	0.925607	0.951078	0.987352	0.991391	1.06063	1.05288	1.07927	1.13706	0.928392	0.96692	0.929406	0.956731	0.995466	1.00692	1.01212	1.02001	0.994833	0.980226	1.00212	0.981009	0.936095	0.940204	1.02251	1.03325
851	LINC00511	LINC00511	ASO_G0227036_AD_03	Targeted lncRNA	r12b2ADp2	0.872339	0.93284	1.01414	0.969136	0.998791	0.98353	1.00819	0.994202	1.00664	1.02707	1.0284	1.04671	1.01185	0.982041	1.00833	0.974693	0.996575	0.98236	1.01234	0.994733	0.960746	0.993154	0.962645	0.989302	0.988048	0.98058	1.02304	1.00203
852	LINC00511	LINC00511	ASO_G0227036_AD_04	Targeted lncRNA	r12b2ADp2	0.877211	0.920931	1.03432	0.97334	1.02276	0.979571	1.00864	0.994107	1.01106	1.0114	1.00842	1.02239	1.03654	0.976016	1.03093	0.974951	1.00239	1.00129	1.00455	1.00378	1.00015	1.01188	0.990944	1.0086	1.01562	0.981412	1.00645	0.99433
853	LINC00511	LINC00511	ASO_G0227036_AD_05	Targeted lncRNA	r12b2ADp2	0.862557	0.895594	1.00003	1.03098	1.03276	1.01891	1.00406	1.01037	0.980851	0.983282	0.986073	0.978487	1.00836	1.03005	1.00423	1.01633	0.970675	1.0018	0.973627	0.995208	1.00247	1.02776	0.995309	1.0156	1.01192	1.02506	0.989657	0.987469
854	LINC00511	LINC00511	ASO_G0227036_AD_07	Targeted lncRNA	r12b2ADp2	0.786062	0.793085	0.945387	1.0537	0.990337	1.00783	1.00465	1.00361	0.988602	0.980033	1.00467	1.01	0.968072	1.03332	0.955432	1.02219	0.972051	1.02381	0.978464	1.02303	0.999724	1.03496	0.993101	1.01931	0.964839	1.01496	0.988039	0.993064
855	LINC00511	LINC00511	ASO_G0227036_AD_10	Targeted lncRNA	r12b2ADp2	0.565963	0.600933	0.790077	0.831814	0.975912	0.976732	0.998271	1.00145	1.07143	1.06501	1.15023	1.10916	0.898052	0.914205	0.877699	0.899862	0.899395	0.920126	0.948168	0.959921	0.878452	0.898185	0.884328	0.904277	0.84903	0.870243	1.03806	1.03145
856	LINC00517	LINC00517	ASO_G0259091_01	Targeted lncRNA	r3b2p4	1.09668	1.06366	0.897091	0.901318	0.908258	0.990542	0.974129	0.985475	1.02066	0.956256	1.04999	0.988656	0.897334	0.947428	0.90727	0.948625	1.01105	0.971311	0.994883	0.965952	1.00223	0.979164	1.01056	0.9808	0.924704	0.95819	0.996491	0.989708
857	LINC00517	LINC00517	ASO_G0259091_02	Targeted lncRNA	r3b2p4	0.980659	1.0333	0.923622	0.947131	0.843116	0.859786	0.951571	0.96433	1.08184	1.06063	1.09569	1.07717	0.860213	0.895556	0.863914	0.898897	1.04093	1.03427	1.02878	1.01876	1.06175	1.05576	1.07138	1.06583	0.916415	0.944505	0.993827	1.00011
858	LINC00517	LINC00517	ASO_G0259091_05	Targeted lncRNA	r3b2p4	1.07841	1.01964	1.00702	0.91399	0.942768	0.961228	0.981745	0.993113	1.00012	1.00527	1.01775	1.04553	0.967762	0.941171	0.968592	0.93356	1.04271	0.978541	1.0241	0.988403	1.05426	0.988618	1.04497	0.988476	0.981178	0.938209	0.990041	0.999475
859	LINC00517	LINC00517	ASO_G0259091_06	Targeted lncRNA	r3b2p4	1.0804	0.966542	0.894425	0.950885	0.990631	0.964343	0.987057	0.985517	0.992531	1.02125	1.02873	1.06018	0.93391	0.955077	0.934689	0.951898	0.95734	0.994023	0.966724	1.0008	0.969329	0.982015	0.973539	0.994811	0.927548	0.952029	0.99586	1.01254
860	LINC00517	LINC00517	ASO_G0259091_09	Targeted lncRNA	r3b2p4	1.03817	0.963016	1.0075	0.971035	1.00372	0.952839	0.98861	0.985459	0.99708	1.02858	0.952966	1.03512	0.99011	0.964955	0.982968	0.967773	1.00545	0.993461	0.990007	1.00042	1.04214	1.01369	1.04143	1.02309	1.02238	0.97537	0.970914	1.01056
861	LINC00517	LINC00517	ASO_G0259091_AD_03	Targeted lncRNA	r11b1ADp6	0.996572	0.982762	1.11122	1.16641	0.997189	1.04702	0.996632	1.01649	0.986531	0.953523	0.958166	0.937957	1.02725	1.10034	1.03299	1.10421	1.0497	1.04646	1.04454	1.0498	1.07384	1.03498	1.07384	1.02878	1.05737	1.0839	0.985219	1.00031
862	LINC00517	LINC00517	ASO_G0259091_AD_04	Targeted lncRNA	r11b1ADp6	0.933118	0.83232	0.927841	0.875407	0.982181	0.951421	0.994305	0.98133	1.00159	1.05867	1.01871	1.10733	0.946738	0.895677	0.944323	0.890337	0.969625	0.960637	0.971896	0.974144	0.968328	0.941229	0.978416	0.943193	0.949879	0.895737	1.00138	1.02057
863	LINC00517	LINC00517	ASO_G0259091_AD_06	Targeted lncRNA	r11b1ADp6	0.983251	0.936269	1.04758	0.974254	0.93989	0.98098	0.988437	0.993479	1.015	0.994285	0.984355	0.989001	0.971844	0.971078	0.983084	0.966945	1.02566	0.986389	1.01575	0.986707	1.04489	1.0174	1.0474	1.01099	1.0297	0.983128	0.988019	0.984549
864	LINC00517	LINC00517	ASO_G0259091_AD_07	Targeted lncRNA	r11b1ADp6	0.772635	0.761121	1.00934	0.934345	0.978526	1.01283	0.996915	0.997461	1.00908	1.01174	0.998966	1.02883	0.996821	0.97273	0.991678	0.968821	1.01741	0.974238	1.00645	0.982559	1.02751	0.946776	1.01757	0.951798	1.01179	0.95119	0.985103	1.00335
865	LINC00517	LINC00517	ASO_G0259091_AD_10	Targeted lncRNA	r11b1ADp6	1.00194	0.911765	0.958369	0.97561	1.03386	0.962264	1.00982	0.986583	0.985338	1.03462	0.99689	1.07745	1.0029	0.967364	0.998716	0.970939	0.977379	1.02448	0.981782	1.02719	0.957149	0.979333	0.960816	0.989693	0.981215	0.950222	1.00283	1.03243
866	LINC00630	LINC00630	ASO_G0223546_01	Targeted lncRNA	r2b1p3	0.998473	0.985736	0.951752	0.905054	0.949091	0.987071	0.992402	1.00996	1.03106	1.02316	1.04589	1.08739	0.940604	0.961902	0.940087	0.954651	0.996033	0.982104	0.994835	1.002	1.00009	0.92572	0.996477	0.927398	0.949441	0.915282	1.00483	1.02866
867	LINC00630	LINC00630	ASO_G0223546_02	Targeted lncRNA	r2b1p3	0.92729	0.861908	1.16721	1.25445	1.15517	1.13739	1.01916	1.02493	0.906466	0.907083	0.843745	0.88521	1.1482	1.17749	1.14031	1.184	1.00343	1.04771	0.992944	1.04105	1.07622	1.07557	1.04847	1.05134	1.14701	1.16683	0.945004	0.972879
868	LINC00630	LINC00630	ASO_G0223546_04	Targeted lncRNA	r2b1p3	0.834972	0.829427	1.1005	0.98484	0.998583	0.973898	1.00469	0.996066	0.999302	1.00938	1.00875	0.976125	1.0428	0.976695	1.04041	0.976925	1.03525	1.00193	1.03927	1.00343	1.02361	1.01434	1.02032	1.01275	1.03053	0.990375	1.003	0.988378
869	LINC00630	LINC00630	ASO_G0223546_05	Targeted lncRNA	r2b1p3	0.997046	0.997139	1.0166	0.94593	0.982403	0.977125	0.997899	1.00039	1.00589	1.00164	0.985678	1.03125	0.998203	0.957884	1.00059	0.957879	1.01827	0.983899	1.0111	0.995871	1.02589	0.975217	1.02246	0.986072	1.01221	0.953782	0.989867	1.0118
870	LINC00630	LINC00630	ASO_G0223546_09	Targeted lncRNA	r2b1p3	1.03018	1.04639	1.18197	1.14897	1.09331	1.08063	1.02004	1.01747	0.926481	0.91551	0.891249	0.893426	1.13611	1.11119	1.13998	1.11816	1.04788	1.05045	1.01572	1.042	1.05687	1.04456	1.04008	1.02948	1.13927	1.09389	0.970684	0.980408
871	LINC00654	LINC00654	ASO_G0205181_01	Targeted lncRNA	r2b1p3	0.842046	0.811204	0.990271	1.12893	1.05515	1.03815	1.00686	1.0095	0.962823	0.948199	0.924757	0.884521	1.01905	1.07101	1.01081	1.07062	0.96316	1.01745	0.959142	0.996245	1.01314	1.10273	1.00238	1.08566	1.02686	1.12499	0.957876	0.949801
872	LINC00654	LINC00654	ASO_G0205181_02	Targeted lncRNA	r2b1p3	0.942326	1.02808	1.04072	1.1104	1.08375	1.05697	1.01366	1.01309	0.970191	0.950649	0.932261	0.934606	1.07126	1.08094	1.06245	1.07538	0.98509	1.02908	0.991774	1.02049	1.00872	1.03981	1.00529	1.02307	1.0565	1.07059	0.975802	0.983332
873	LINC00654	LINC00654	ASO_G0205181_03	Targeted lncRNA	r2b1p3	1.02679	0.909526	1.16106	1.1227	1.04765	1.05565	1.00911	1.01162	0.964662	0.901023	0.877993	0.856327	1.09039	1.07298	1.09188	1.08486	1.03533	1.01174	1.01831	0.991973	1.0906	1.05512	1.07468	1.04383	1.12984	1.11921	0.950363	0.959209
874	LINC00654	LINC00654	ASO_G0205181_04	Targeted lncRNA	r2b1p3	0.74321	0.664403	0.993329	0.980025	0.9892	0.968973	0.998961	0.998037	0.995477	0.983981	0.992599	0.984709	0.99256	0.960708	0.983781	0.962206	1.00193	0.999227	1.00238	0.995492	1.01441	1.01704	1.00718	1.01526	0.986021	0.970893	0.987498	0.992719
875	LINC00654	LINC00654	ASO_G0205181_05	Targeted lncRNA	r2b1p3	0.923556	0.946213	1.0083	0.970621	0.981002	0.995218	0.998445	1.00151	0.993875	1.00747	1.02171	1.00764	0.990936	0.983489	0.993194	0.981008	1.02049	1.00114	1.02351	0.99745	0.993129	0.991179	0.992509	0.985256	0.976187	0.971784	1.01097	0.998176
876	LINC00654	LINC00654	ASO_G0205181_AD_01	Targeted lncRNA	r12b2ADp1	1.00019	1.00851	0.957303	1.01314	1.03475	1.03672	0.998066	1.00106	0.971609	0.974064	0.964423	0.95145	0.990534	1.02714	0.991653	1.03219	0.973227	0.994858	0.968163	0.988017	1.00486	1.02033	0.997697	1.01178	1.00282	1.03406	0.978984	0.977561
877	LINC00654	LINC00654	ASO_G0205181_AD_02	Targeted lncRNA	r12b2ADp1	0.629737	0.625001	0.866653	0.827812	0.941693	0.92546	0.970002	0.96488	1.05447	1.07114	1.07586	1.12358	0.878981	0.859357	0.871238	0.850867	0.955577	0.940783	0.957547	0.946699	0.960022	0.937424	0.968891	0.948335	0.911752	0.873574	0.996047	1.01251
878	LINC00654	LINC00654	ASO_G0205181_AD_03	Targeted lncRNA	r12b2ADp1	0.978794	0.939719	0.96498	1.01492	1.0089	1.00492	1.00081	1.0044	1.00227	0.992659	1.00773	0.981282	0.992508	1.01853	0.995917	1.02916	1.00073	1.02437	0.993058	1.00585	0.996092	1.01404	0.997893	1.00211	0.991692	1.01994	1.00206	0.989721
879	LINC00654	LINC00654	ASO_G0205181_AD_05	Targeted lncRNA	r12b2ADp1	0.805327	0.795741	0.972274	0.876939	0.939904	0.947515	0.975217	0.980823	1.08636	1.05391	1.10274	1.092	0.941411	0.898225	0.9418	0.894666	1.01896	0.968761	1.01845	0.978562	0.993292	0.95331	1.00105	0.957652	0.944908	0.896022	1.01983	1.0088
880	LINC00654	LINC00654	ASO_G0205181_AD_10	Targeted lncRNA	r12b2ADp1	0.499952	0.453385	0.743821	0.766759	0.967162	0.979422	1.00116	1.00907	1.07924	1.08382	1.14718	1.15699	0.86074	0.877554	0.843982	0.857446	0.888473	0.889458	0.9328	0.943655	0.825899	0.821162	0.836794	0.833144	0.809541	0.817513	1.05403	1.05458
881	NORAD	LINC00657	ASO_G0260032_01	Targeted lncRNA	r15bALLp1	0.980745	0.864001	0.977925	1.02629	0.953359	0.972952	1.00133	1.00459	0.992551	1.04629	1.01636	1.01355	0.968466	0.998679	0.969968	1.00579	1.00362	1.02278	1.01622	1.01946	0.990445	1.0088	0.992049	1.00003	0.964051	1.00431	1.0176	1.00506
882	NORAD	LINC00657	ASO_G0260032_02	Targeted lncRNA	r15bALLp1	1.05625	0.968231	1.00109	0.961015	0.956954	0.939553	0.997901	0.987298	1.00283	1.04441	1.02025	1.04592	0.977184	0.946504	0.98114	0.95123	1.01143	1.00463	1.00808	1.00693	1.01398	0.997075	1.01451	1.00035	0.981108	0.951356	1.01006	1.00938
883	NORAD	LINC00657	ASO_G0260032_04	Targeted lncRNA	r15bALLp1	0.892096	0.910433	1.05805	0.940489	0.993362	0.961316	1.00308	0.988805	1.02583	0.993737	1.02148	1.01204	1.02254	0.948239	1.01413	0.950626	1.01665	0.981702	1.02545	0.994496	1.01244	0.983104	1.01187	0.986276	1.0147	0.950662	1.01027	1.00267
884	NORAD	LINC00657	ASO_G0260032_05	Targeted lncRNA	r15bALLp1	1.05051	1.01618	0.954088	0.968948	0.972964	0.986179	0.992992	1.00437	0.997526	1.02322	1.00731	1.03554	0.958526	0.981533	0.961562	0.979433	0.977221	0.999787	0.985493	1.01462	0.998094	0.977876	0.996154	0.983984	0.974428	0.961729	1.00065	1.01285
885	NORAD	LINC00657	ASO_G0260032_06	Targeted lncRNA	r15bALLp1	1.0831	1.02445	1.02968	0.934124	1.02318	0.9753	1.00438	0.99588	0.985892	1.01916	0.989191	1.0256	1.03647	0.949313	1.03299	0.947483	1.00036	0.976239	1.00478	0.982032	0.995054	0.981928	0.990324	0.984325	1.02412	0.958161	1.00436	1.00318
886	NORAD	LINC00657	ASO_G0260032_AD_01	Targeted lncRNA	r10b0ADp4	1.01685	0.97879	0.9296	0.936766	1.01703	0.956151	1.00681	0.990804	1.0494	1.02722	1.08962	1.08817	0.984563	0.942475	0.970529	0.940426	0.974745	0.992879	0.991492	0.998585	0.918734	0.970412	0.934205	0.980666	0.934742	0.935075	1.03697	1.02052
887	NORAD	LINC00657	ASO_G0260032_AD_06	Targeted lncRNA	r10b0ADp4	0.948499	0.921338	1.00842	0.944385	1.03331	0.973076	1.01482	1.00013	0.961962	1.03696	1.01866	1.09105	1.0322	0.960581	1.02383	0.954484	0.993077	0.992002	0.99476	0.995265	0.98188	0.967223	0.975603	0.964625	1.00778	0.938809	1.0141	1.01952
888	NORAD	LINC00657	ASO_G0260032_AD_07	Targeted lncRNA	r10b0ADp4	0.837747	0.915972	0.993145	1.05434	0.977455	0.99874	0.991088	0.992493	1.03463	1.02858	1.0832	1.02408	0.982635	1.0169	0.973741	1.02438	1.00984	1.03126	1.02089	1.02302	0.976343	1.01706	0.985907	1.01722	0.960731	1.00914	1.02663	1.01051
889	NORAD	LINC00657	ASO_G0260032_AD_08	Targeted lncRNA	r10b0ADp4	0.779722	0.767264	0.96168	0.956667	0.941443	0.969555	0.989206	0.991399	1.0553	1.044	1.1157	1.10589	0.95274	0.961777	0.940563	0.945875	1.00376	0.987079	1.02956	0.999542	0.995081	0.990219	1.00226	0.996033	0.934579	0.945342	1.03245	1.01603
890	NORAD	LINC00657	ASO_G0260032_AD_10	Targeted lncRNA	r10b0ADp4	0.948833	0.858634	1.16549	0.992517	1.0574	1.01196	1.01493	1.00616	0.978297	0.999967	0.991672	1.03975	1.11555	1.01114	1.11255	1.00863	1.05728	1.01239	1.04718	1.01217	1.04229	0.97342	1.03435	0.974492	1.09169	0.985197	1.00889	1.01895
891	LINC00662	LINC00662	ASO_G0261824_02	Targeted lncRNA	r9b8p2	0.999143	0.989204	1.06455	1.02008	1.08003	1.01944	1.01333	0.997805	0.953836	0.978361	0.938546	0.950595	1.07951	1.01848	1.07548	1.01643	1.00366	0.98507	0.993509	0.981234	1.01785	1.01663	1.0118	1.01523	1.0672	1.03038	0.980952	0.974087
892	LINC00662	LINC00662	ASO_G0261824_04	Targeted lncRNA	r9b8p2	0.863835	0.863593	1.12902	0.962151	1.05388	1.02885	1.00402	1.00035	0.987858	1.01286	0.954136	1.00516	1.0757	1.00525	1.06792	1.00407	1.02586	0.981352	1.01787	0.983778	1.06303	0.967944	1.06064	0.970822	1.07877	0.984315	0.981205	1.00247
893	LINC00662	LINC00662	ASO_G0261824_05	Targeted lncRNA	r9b8p2	0.831017	0.789636	1.03087	1.04759	1.0196	1.02273	0.995018	1.00312	0.973153	1.00602	0.980074	0.990939	1.02683	1.03103	1.02595	1.02098	1.01036	1.00591	0.997107	0.992966	1.02723	1.02838	1.02275	1.01823	1.03085	1.0314	0.983023	0.985292
894	LINC00662	LINC00662	ASO_G0261824_07	Targeted lncRNA	r9b8p2	0.850629	0.811444	1.02484	0.964338	1.05946	1.00117	1.01436	1.00394	0.97367	1.01726	1.00685	1.05418	1.04607	0.97984	1.03849	0.974386	0.986026	0.983611	0.981123	0.995123	0.978935	0.9523	0.97153	0.958925	1.03003	0.952671	1.00405	1.01862
895	LINC00662	LINC00662	ASO_G0261824_08	Targeted lncRNA	r9b8p2	0.921114	0.881135	1.01098	1.05445	1.00564	1.05789	1.00061	0.999905	0.996383	0.970012	1.01138	0.984778	1.01808	1.05423	1.01338	1.04381	0.997463	0.997724	1.00563	1.00037	1.0088	1.00609	1.01349	1.00377	1.00562	1.02467	0.999394	0.992791
896	LINC00667	LINC00667	ASO_G0263753_01	Targeted lncRNA	r9b8p3	0.87384	0.853504	0.898222	0.886641	0.995693	0.976891	0.999143	1.00213	1.02207	1.00433	1.06396	1.05585	0.953176	0.931486	0.94694	0.929238	0.958846	0.966979	0.984926	0.974805	0.930753	0.94834	0.931476	0.947309	0.919121	0.919416	1.00942	1.00853
897	LINC00667	LINC00667	ASO_G0263753_05	Targeted lncRNA	r9b8p3	1.03653	0.907167	0.990302	1.02595	1.03114	0.984377	1.00866	0.997733	0.939211	1.01745	0.963643	1.04713	1.01791	0.998482	1.01739	0.992002	0.978493	1.02203	0.981501	1.01791	0.994785	1.00962	0.980593	1.01025	1.00606	0.997062	0.972153	1.00928
898	LINC00667	LINC00667	ASO_G0263753_06	Targeted lncRNA	r9b8p3	0.962435	0.871684	0.927679	0.929248	0.99407	1.0039	1.00681	0.998932	0.988864	1.01642	1.02464	1.05519	0.962554	0.974084	0.959787	0.959783	0.97547	0.959305	0.984923	0.980468	0.966934	0.955608	0.961435	0.958359	0.943557	0.949455	1.00004	1.01444
899	LINC00667	LINC00667	ASO_G0263753_08	Targeted lncRNA	r9b8p3	0.996221	0.91011	0.996362	1.0468	1.0081	0.999154	1.00668	1.00223	0.976053	1.0014	1.00865	1.0145	1.01253	1.02624	1.01229	1.02127	1.00327	1.01753	1.00566	1.01602	0.992797	1.0213	0.993124	1.02135	0.997844	1.0232	1.00709	0.998778
900	LINC00667	LINC00667	ASO_G0263753_10	Targeted lncRNA	r9b8p3	1.00197	0.971986	0.980163	1.02049	0.970368	1.01642	0.988539	1.00082	1.00941	0.998222	1.05867	1.02743	0.972203	1.0195	0.973522	1.00737	1.00659	1.01367	1.00718	1.01415	1.00165	1.00956	1.00116	1.00901	0.970355	1.00123	1.00693	1.00342
901	LINC00667	LINC00667	ASO_G0263753_AD_01	Targeted lncRNA	r12b2ADp4	0.912591	0.912902	0.953357	1.02415	0.942398	0.944803	0.978663	0.987088	1.04389	1.03875	1.05336	1.02187	0.940474	0.980045	0.94314	0.979622	1.01831	1.04596	1.00994	1.03608	1.01914	1.05248	1.02462	1.05393	0.953156	0.998718	1.00026	0.993734
902	LINC00667	LINC00667	ASO_G0263753_AD_02	Targeted lncRNA	r12b2ADp4	0.859952	0.953813	1.10482	1.08037	0.993468	0.980647	0.993837	0.979672	1.01145	0.991868	1.00519	1.00875	1.03995	1.01294	1.0423	1.02085	1.04628	1.04253	1.04017	1.02659	1.04224	1.05725	1.0483	1.05496	1.0515	1.04784	1.00644	1.00102
903	LINC00667	LINC00667	ASO_G0263753_AD_04	Targeted lncRNA	r12b2ADp4	0.917976	0.874438	1.0144	1.00591	1.02205	1.00762	0.995907	0.995286	1.00951	1.01148	1.01219	0.98521	1.01703	1.01022	1.01024	1.00926	1.00537	0.998896	0.997679	0.99557	1.00694	1.00687	1.0164	1.01333	1.0104	1.01988	0.9927	0.995161
904	LINC00667	LINC00667	ASO_G0263753_AD_06	Targeted lncRNA	r12b2ADp4	0.927563	0.932173	1.11039	1.07087	1.0029	0.969682	0.993972	0.989967	0.992424	0.97007	0.98564	0.975412	1.04312	1.01007	1.034	1.01901	1.04805	1.03468	1.03758	1.0133	1.08146	1.06989	1.08914	1.06616	1.0637	1.05622	0.994076	0.98406
905	LINC00667	LINC00667	ASO_G0263753_AD_09	Targeted lncRNA	r12b2ADp4	0.975522	0.959296	1.06208	1.00532	0.971432	1.03962	0.985129	1.01072	1.03346	0.979318	1.05163	0.996084	1.01108	1.01778	1.00459	1.01621	1.05102	0.992846	1.0447	0.985271	1.04914	0.977918	1.04744	0.980462	1.00981	1.00828	1.00391	1.00577
906	LINC00674	LINC00674	ASO_G0237854_02	Targeted lncRNA	r14b9plusp5;r7b6p5	1.00462	0.88396	0.930989	0.97788	0.952169	0.957975	0.988846	0.997126	1.00508	1.04878	1.04506	1.07907	0.948075	0.974952	0.946625	0.969844	0.978174	0.995419	0.993915	1.00523	0.993439	0.992081	0.998414	0.997376	0.948337	0.9743	1.00592	1.02092
907	LINC00674	LINC00674	ASO_G0237854_04	Targeted lncRNA	r14b9plusp5;r7b6p5	0.929806	0.993493	1.00313	1.01981	1.06435	1.01765	1.01596	1.00605	1.03779	0.978919	0.971475	1.01698	1.04347	1.02899	1.04093	1.02393	0.964878	1.00916	0.970036	1.01333	0.953268	0.993715	0.959144	0.996952	1.02866	1.00959	1.00567	1.00767
908	LINC00674	LINC00674	ASO_G0237854_05	Targeted lncRNA	r14b9plusp5;r7b6p5	0.98116	0.94375	0.940157	1.03493	0.995559	0.99927	0.999847	1.00868	0.964083	0.974702	0.991658	0.988972	0.982905	1.03132	0.976657	1.03089	0.965428	1.01617	0.976757	1.02585	0.974921	1.02589	0.974559	1.02374	0.974307	1.0219	0.996731	0.998928
909	LINC00674	LINC00674	ASO_G0237854_06	Targeted lncRNA	r14b9plusp5;r7b6p5	1.02403	0.929204	1.01733	0.973312	0.986725	1.03597	1.00555	1.01096	1.0346	0.994779	1.00611	1.00966	1.01347	1.01702	1.00683	1.00973	1.01434	0.965871	1.00819	0.983204	1.01512	0.957857	1.00663	0.962337	1.02153	0.989823	0.998179	1.00596
910	LINC00674	LINC00674	ASO_G0237854_10	Targeted lncRNA	r14b9plusp5;r7b6p5	1.02622	0.944382	0.945337	1.02255	0.952677	1.04852	0.988769	1.01346	1.03147	0.980258	1.07716	0.971277	0.953117	1.04419	0.950853	1.03216	0.984151	0.977454	0.992855	0.984681	0.98156	1.0129	0.984995	1.00817	0.955511	1.03845	1.01493	0.985682
911	LINC00674	LINC00674	ASO_G0237854_AD_02	Targeted lncRNA	r12b2ADp3	1.03167	1.0468	1.00371	0.996952	1.00803	0.944687	1.01314	0.998439	0.991422	1.00829	1.00914	1.04153	1.0132	0.968354	1.00667	0.968168	0.991218	1.02115	0.995735	1.0176	0.978021	1.01892	0.979741	1.02	1.00057	0.976091	1.00927	1.00866
912	LINC00674	LINC00674	ASO_G0237854_AD_04	Targeted lncRNA	r12b2ADp3	0.930553	0.903174	0.963324	0.974059	1.0495	1.0638	1.00707	1.02015	1.00076	0.975671	1.06153	1.04941	1.02283	1.03454	1.01108	1.01979	0.963488	0.972967	0.978027	0.989329	0.954409	0.941375	0.951731	0.944939	0.972998	0.979948	1.0199	1.02534
913	LINC00674	LINC00674	ASO_G0237854_AD_06	Targeted lncRNA	r12b2ADp3	0.912724	0.964274	0.989692	1.03639	1.02275	0.99215	1.01328	1.0091	0.982865	1.00631	1.02383	1.06863	1.0249	1.02977	1.01803	1.02258	1.00521	1.03084	1.01005	1.03468	0.982284	0.987135	0.984585	0.99377	0.985532	0.98908	1.01607	1.02774
914	LINC00674	LINC00674	ASO_G0237854_AD_08	Targeted lncRNA	r12b2ADp3	0.911798	0.979081	1.13157	1.01308	1.03011	1.01042	1.01554	1.01405	0.972591	0.995763	0.983907	1.00673	1.09613	1.03605	1.1035	1.04101	1.05505	1.03068	1.04537	1.02683	1.01524	0.96758	1.01153	0.973291	1.07319	1.01219	1.01747	1.02525
915	LINC00674	LINC00674	ASO_G0237854_AD_10	Targeted lncRNA	r12b2ADp3	0.930797	0.915139	0.96748	1.03321	1.00828	0.997542	1.0088	0.995661	0.999806	0.997008	1.02195	1.03826	1.0069	1.0166	1.00395	1.01474	0.990476	1.01606	0.997849	1.00916	0.970566	1.01372	0.977636	1.00727	0.978134	1.01597	1.00805	1.0157
916	LINC00702	LINC00702	ASO_G0233117_01	Targeted lncRNA	r14b9plusp3	0.90824	1.00084	1.10825	1.12583	1.00106	1.00334	1.00523	1.00612	1.00485	1.01181	0.987475	1.01277	1.04941	1.06006	1.05193	1.06445	1.03216	1.04208	1.03251	1.04125	1.04218	1.03664	1.04659	1.03805	1.06322	1.05845	1.00746	1.0151
917	LINC00702	LINC00702	ASO_G0233117_02	Targeted lncRNA	r14b9plusp3	0.100843	0.074738	0.682999	0.622026	0.942181	0.938012	0.973111	0.944941	1.10161	1.12518	1.23506	1.23166	0.809398	0.766701	0.796996	0.749213	0.855945	0.810747	0.897782	0.853696	0.793335	0.768964	0.809339	0.78669	0.76169	0.735971	1.06186	1.03991
918	LINC00702	LINC00702	ASO_G0233117_03	Targeted lncRNA	r14b9plusp3	0.800723	0.828779	0.99451	0.95865	1.00985	0.97858	0.996455	0.993757	0.963005	1.01543	0.97795	1.04255	1.00964	0.966141	1.01081	0.962978	1.00339	0.998095	0.994077	0.998112	1.04038	0.999281	1.02623	1.00285	1.01346	0.966519	0.987233	1.01158
919	LINC00702	LINC00702	ASO_G0233117_04	Targeted lncRNA	r14b9plusp3	0.815674	0.830759	0.967174	0.944882	1.07719	1.06216	1.00673	1.004	1.01123	0.998539	1.0754	1.07035	1.04006	1.01222	1.02591	0.997354	0.963653	0.946928	0.993758	0.982162	0.945463	0.953147	0.940543	0.951471	0.965409	0.956415	1.03594	1.02683
920	LINC00702	LINC00702	ASO_G0233117_10	Targeted lncRNA	r14b9plusp3	0.987213	1.04052	1.04309	0.961601	1.01166	1.02632	1.00178	1.00963	1.00193	1.00681	0.989035	0.990036	1.02519	1.00385	1.03294	0.998982	1.01591	0.964139	1.00983	0.9709	1.02559	0.986847	1.01817	0.978498	1.02161	0.995913	0.996918	0.996145
921	LINC00702	LINC00702	ASO_G0233117_AD_03	Targeted lncRNA	r10b0ADp2	1.00003	0.99869	1.04866	0.931262	1.03284	0.988143	1.00301	0.99452	0.961266	1.00002	0.964861	1.02009	1.04519	0.957265	1.04545	0.955613	1.01563	0.983251	1.00175	0.984646	1.02266	0.970838	1.01461	0.970943	1.04538	0.951237	0.987843	0.999874
922	LINC00702	LINC00702	ASO_G0233117_AD_04	Targeted lncRNA	r10b0ADp2	0.991173	1.04109	0.966452	1.00923	0.983946	0.994686	0.993389	1.00342	1.0165	1.00035	1.051	1.00666	0.975537	1.00471	0.972193	1.00606	0.989331	1.01139	0.995599	1.00592	0.976155	1.00226	0.976522	0.996883	0.963134	0.995111	1.01452	1.00656
923	LINC00702	LINC00702	ASO_G0233117_AD_07	Targeted lncRNA	r10b0ADp2	0.932442	0.987056	0.939112	0.933023	1.00907	0.977652	0.997953	0.995706	0.997965	1.00318	1.04179	1.03036	0.982354	0.96155	0.974864	0.960291	0.965229	0.985715	0.977259	0.989215	0.984654	0.975705	0.97648	0.980444	0.960165	0.955684	1.00443	1.00978
924	LINC00702	LINC00702	ASO_G0233117_AD_08	Targeted lncRNA	r10b0ADp2	0.973132	0.989804	1.00026	0.995017	0.958926	0.95097	0.988124	0.985054	1.03538	1.03008	1.07217	1.02622	0.973488	0.966381	0.965714	0.969497	1.01835	1.0096	1.01833	1.00836	1.02273	1.02153	1.02606	1.01927	0.984972	0.981355	1.01437	1.0036
925	LINC00702	LINC00702	ASO_G0233117_AD_09	Targeted lncRNA	r10b0ADp2	0.744422	0.859683	0.891722	0.910124	0.972269	0.946223	0.986306	0.979105	1.02403	1.04461	1.06692	1.09085	0.935758	0.923806	0.919449	0.914865	0.9529	0.971449	0.97172	0.98513	0.982598	0.996254	0.987949	1.00645	0.922516	0.92339	0.996822	1.00706
926	LINC00707	LINC00707	ASO_G0238266_01	Targeted lncRNA	r7b6p2	1.02304	0.971927	1.02703	0.967363	1.00052	0.949355	0.997604	0.993234	0.975875	1.01032	0.960251	1.00915	1.00722	0.954743	1.0086	0.95892	1.01589	1.01172	0.99788	1.00076	1.04562	1.00167	1.0311	0.997921	1.03282	0.968512	0.974677	0.996207
927	LINC00707	LINC00707	ASO_G0238266_03	Targeted lncRNA	r7b6p2	0.968646	0.84023	0.977955	0.999996	1.00574	1.0513	0.990339	1.00107	0.981483	0.963439	0.999237	0.983798	0.985783	1.02669	0.985773	1.01213	0.993806	0.991482	0.99297	0.978561	1.01438	1.02676	1.0054	1.01244	0.988476	1.02466	0.981803	0.973722
928	LINC00707	LINC00707	ASO_G0238266_04	Targeted lncRNA	r7b6p2	0.921469	0.836832	0.938281	0.998563	1.01683	0.979174	0.996379	0.997422	0.967533	1.00215	0.989631	1.02583	0.976749	0.991102	0.972597	0.985648	0.964684	1.00044	0.967049	1.00053	0.994968	1.00514	0.988929	1.00175	0.97237	0.986071	0.978258	1.00717
929	LINC00707	LINC00707	ASO_G0238266_05	Targeted lncRNA	r7b6p2	0.988621	0.798911	0.985208	0.989434	1.02154	0.943095	0.992191	0.981568	1.00222	1.01565	1.01205	1.02466	1.00802	0.950062	1.00053	0.950546	0.996116	1.0009	0.997317	0.988143	1.01094	1.04299	0.998394	1.0464	1.00218	0.994146	0.983166	0.983917
930	LINC00707	LINC00707	ASO_G0238266_06	Targeted lncRNA	r7b6p2	0.893108	0.784944	0.978405	0.96159	0.917525	0.945881	0.97292	0.981315	1.03628	1.04049	1.07416	1.06969	0.939427	0.951919	0.937924	0.94496	1.02316	1.0055	1.00996	1.01024	1.05593	1.01418	1.05988	1.01226	0.973911	0.951701	0.989951	1.00317
931	LINC00707	LINC00707	ASO_G0238266_AD_02	Targeted lncRNA	r11b1ADp3	1.04398	0.979128	1.01399	1.00411	1.01203	0.942792	1.00145	0.987397	0.972663	1.01935	0.968378	0.981564	1.01855	0.967066	1.02402	0.97381	1.01124	1.03565	1.00587	1.0083	1.00363	1.04304	1.00413	1.04253	1.01907	1.00884	0.99486	0.991555
932	LINC00707	LINC00707	ASO_G0238266_AD_03	Targeted lncRNA	r11b1ADp3	0.914036	0.962791	1.00149	0.957525	1.04538	0.984809	0.995341	0.997318	0.982912	1.00584	0.95995	1.00543	1.02098	0.974057	1.01398	0.970925	0.97566	0.993343	0.973708	0.981698	1.00702	0.991019	1.00174	0.992014	1.01812	0.978743	0.975408	1.00074
933	LINC00707	LINC00707	ASO_G0238266_AD_05	Targeted lncRNA	r11b1ADp3	0.686132	0.740578	0.877175	0.87502	0.953026	0.956678	0.98394	0.987697	1.05179	1.04561	1.10625	1.08421	0.911181	0.916708	0.900849	0.912711	0.940761	0.971486	0.961963	0.976824	0.923861	0.949236	0.933264	0.952238	0.894939	0.907498	1.02163	1.01545
934	LINC00707	LINC00707	ASO_G0238266_AD_06	Targeted lncRNA	r11b1ADp3	0.512641	0.568888	0.947824	0.93821	0.983102	1.023	0.978584	0.992922	1.02655	0.974033	1.01916	0.98262	0.953294	0.978775	0.948697	0.968836	0.947341	0.945288	0.941137	0.951944	1.00132	0.98891	0.993932	0.975966	0.984694	0.969614	0.983518	0.976817
935	LINC00707	LINC00707	ASO_G0238266_AD_08	Targeted lncRNA	r11b1ADp3	0.927533	0.960779	0.977659	1.01273	0.967515	0.974593	0.99843	0.993427	1.0293	1.01017	1.02644	1.03099	0.979346	0.993057	0.9801	1.0029	1.00534	1.02033	1.00704	1.0187	0.988446	1.00548	0.994339	1.01281	0.974271	1.00171	1.00692	1.01519
936	LINC00847	LINC00847	ASO_G0245060_01	Targeted lncRNA	r7b6p3	0.881606	0.792544	0.94415	0.906628	0.952364	0.937882	0.992675	0.995372	1.07305	1.05063	1.08917	1.08204	0.948562	0.92364	0.94261	0.919637	0.98699	0.9819	1.0068	1.00021	0.971656	0.979766	0.977402	0.980013	0.933752	0.918192	1.01899	1.01482
937	LINC00847	LINC00847	ASO_G0245060_02	Targeted lncRNA	r7b6p3	0.610353	0.538529	0.887293	0.908523	0.850647	0.860861	0.948067	0.937275	1.11139	1.10333	1.14601	1.1395	0.836705	0.852553	0.843779	0.85129	1.01156	1.00616	0.988164	1.00305	1.03304	1.0397	1.04218	1.04806	0.900946	0.905048	1.00143	0.99343
938	LINC00847	LINC00847	ASO_G0245060_03	Targeted lncRNA	r7b6p3	0.723477	0.677655	0.944763	0.922867	0.948337	0.934659	0.979208	0.98462	1.06281	1.0721	1.05554	1.09668	0.936742	0.925198	0.931022	0.92295	0.992803	0.982697	0.995499	0.994534	1.00315	0.966417	1.01116	0.978394	0.944978	0.921931	0.993983	1.01801
939	LINC00847	LINC00847	ASO_G0245060_06	Targeted lncRNA	r7b6p3	0.75689	0.748251	0.938699	0.939417	1.01114	0.97064	1.00657	0.993327	1.01843	1.02419	1.03556	1.03911	0.975869	0.947346	0.967977	0.947244	0.965299	0.986957	0.977783	0.985707	0.9654	1.00907	0.962765	1.00648	0.958445	0.961303	1.00381	0.994168
940	LINC00847	LINC00847	ASO_G0245060_10	Targeted lncRNA	r7b6p3	0.803618	0.740866	0.924306	0.947954	0.956465	0.953428	0.987514	0.998213	1.05286	1.03279	1.06903	1.06327	0.940143	0.949398	0.937207	0.947699	0.990459	0.981274	0.996606	0.988371	1.00382	0.986667	1.00289	0.98922	0.945499	0.957079	0.99612	1.01264
941	LINC00856	LINC00856	ASO_G0230417_01	Targeted lncRNA	r3b2p2	0.834148	0.942224	0.841185	0.90658	0.997537	0.99558	0.999511	1.00681	0.962515	1.00579	1.01143	1.03389	0.912509	0.960805	0.917316	0.961691	0.952625	0.981887	0.942732	0.992588	0.932034	0.935999	0.920227	0.939711	0.889381	0.923101	0.988297	1.0171
942	LINC00856	LINC00856	ASO_G0230417_02	Targeted lncRNA	r3b2p2	0.989831	0.912418	0.922389	0.992499	0.939036	0.948693	0.990311	0.9926	1.02348	1.03731	1.0054	1.02201	0.92456	0.97289	0.927275	0.973675	0.981817	1.011	0.968874	1.0173	1.01814	1.01756	1.00462	1.01848	0.959665	0.987426	0.972143	1.00643
943	LINC00856	LINC00856	ASO_G0230417_04	Targeted lncRNA	r3b2p2	0.945163	0.967298	0.867688	0.960721	0.962121	0.938421	0.986633	0.993294	1.01644	1.06416	1.02107	1.05757	0.89875	0.941034	0.896743	0.939264	0.94576	1.00182	0.945663	1.00006	0.980686	0.995395	0.977994	0.997643	0.92174	0.94718	0.975682	1.00689
944	LINC00856	LINC00856	ASO_G0230417_05	Targeted lncRNA	r3b2p2	1.07472	0.911261	0.890093	0.902696	0.937995	0.900116	0.977045	0.981162	1.02051	1.0684	1.00077	1.10634	0.88993	0.897204	0.89289	0.888674	0.980562	1.00046	0.96379	0.998425	1.0088	0.98987	1.00595	0.99974	0.922788	0.910555	0.961865	1.01705
945	LINC00856	LINC00856	ASO_G0230417_07	Targeted lncRNA	r3b2p2	0.857225	0.861439	0.867724	0.847124	0.917155	0.837568	0.973665	0.967332	1.05281	1.11407	1.09785	1.1604	0.878753	0.836563	0.873561	0.835455	0.975651	0.998714	0.981056	0.994392	0.998387	0.973215	1.0002	0.989318	0.889046	0.855138	0.993235	1.02334
946	LINC00862	LINC00862	ASO_G0203721_01	Targeted lncRNA	r3b2p5	0.995077	1.01205	0.948434	0.999101	0.881411	0.93302	0.982265	0.994426	1.0485	1.01181	1.08113	1.01199	0.893477	0.960969	0.896297	0.965949	1.02684	1.01809	1.02056	1.01276	1.02395	1.03643	1.02482	1.03527	0.91818	0.992542	1.00433	0.993944
947	LINC00862	LINC00862	ASO_G0203721_02	Targeted lncRNA	r3b2p5	0.535687	0.558582	0.665262	0.644629	0.776026	0.74162	0.939248	0.939617	1.22017	1.2272	1.43033	1.47826	0.705472	0.677158	0.706294	0.684404	0.980168	0.986192	1.00849	1.02431	0.848829	0.836203	0.878755	0.869787	0.681352	0.64815	1.08199	1.10938
948	LINC00862	LINC00862	ASO_G0203721_03	Targeted lncRNA	r3b2p5	0.877888	0.969673	0.941876	0.879022	0.964133	0.991596	0.986233	0.991947	1.0298	1.04149	1.09595	1.04706	0.956806	0.940722	0.954565	0.935259	1.0119	0.945268	1.00617	0.956726	1.00362	0.947346	1.00278	0.953288	0.948117	0.928763	1.0095	1.00136
949	LINC00862	LINC00862	ASO_G0203721_04	Targeted lncRNA	r3b2p5	0.986846	1.01273	0.978357	0.988665	0.9526	0.906191	0.9878	0.987788	1.01287	1.03687	1.05179	1.07797	0.963723	0.930757	0.967399	0.939971	1.01564	1.02973	1.01821	1.03608	1.01852	1.02731	1.02457	1.03663	0.968047	0.953941	1.01051	1.02106
950	LINC00862	LINC00862	ASO_G0203721_05	Targeted lncRNA	r3b2p5	1.01601	1.03502	0.903337	0.958244	0.951657	1.01643	0.99341	1.00857	1.00282	0.969686	1.09008	1.01014	0.928208	1.00492	0.928836	1.00644	0.985649	0.982141	0.994249	0.985193	0.965575	0.966205	0.971551	0.963029	0.920284	0.983887	1.02259	1.00394
951	DUBR	LINC00883	ASO_G0243701_01	Targeted lncRNA	r1b0p3	0.975814	0.810804	1.02489	0.941625	0.98186	1.01169	1.00063	1.00591	0.987836	1.03538	1.02455	1.01964	0.997981	0.985386	0.998003	0.981608	0.996318	0.950238	0.999369	0.958684	0.991125	0.955676	0.993021	0.957354	1.00312	0.98151	1.01181	1.00306
952	DUBR	LINC00883	ASO_G0243701_02	Targeted lncRNA	r1b0p3	0.956467	0.669011	0.785455	0.766049	0.855457	0.856821	0.973029	0.969338	1.07391	1.12	1.18228	1.20358	0.818852	0.811501	0.818633	0.811313	0.965048	0.942064	0.975535	0.964032	0.944662	0.908288	0.957627	0.936582	0.826599	0.814631	1.03467	1.04631
953	DUBR	LINC00883	ASO_G0243701_03	Targeted lncRNA	r1b0p3	0.846786	0.882524	0.7883	0.761619	0.727339	0.7444	0.924054	0.927384	1.1672	1.18247	1.29222	1.29772	0.732314	0.732	0.740669	0.73323	1.02038	0.996467	1.0245	1.00994	1.01287	0.973105	1.03248	0.995626	0.785805	0.77537	1.04523	1.04444
954	DUBR	LINC00883	ASO_G0243701_04	Targeted lncRNA	r1b0p3	1.0873	0.96217	0.93411	0.925431	0.896611	0.970805	0.987089	0.999064	1.06398	1.07933	1.17004	1.07797	0.917293	0.950314	0.912195	0.945115	1.00804	0.977452	1.02336	0.990627	0.96854	0.950284	0.977098	0.959745	0.904335	0.932866	1.0387	1.02276
955	DUBR	LINC00883	ASO_G0243701_05	Targeted lncRNA	r1b0p3	0.317023	0.254583	0.683513	0.733687	0.685965	0.696435	0.907724	0.902486	1.23528	1.22084	1.42264	1.36365	0.662949	0.687633	0.658262	0.688195	0.980998	1.00272	1.00798	1.00156	0.940584	0.981164	0.967679	1.00687	0.694334	0.742836	1.06764	1.04604
956	DUBR	LINC00883	ASO_G0243701_AD_01	Targeted lncRNA	r10b0ADp3	1.00498	0.975261	0.949841	0.985524	0.985628	0.952342	0.990351	0.988952	0.992517	1.01675	1.0106	1.02242	0.972947	0.965378	0.966824	0.967603	0.984726	1.01441	0.980163	1.0068	0.999726	1.02504	1.00059	1.02496	0.975348	0.982581	0.994474	1.00091
957	DUBR	LINC00883	ASO_G0243701_AD_05	Targeted lncRNA	r10b0ADp3	0.873773	0.841995	0.937068	0.935404	0.958976	0.931977	0.978062	0.979836	1.00708	1.03158	1.04469	1.07439	0.936082	0.930888	0.942792	0.937655	0.994385	1.01449	0.98566	1.00109	1.03397	1.02632	1.02816	1.02159	0.964134	0.953847	0.983015	0.994082
958	DUBR	LINC00883	ASO_G0243701_AD_07	Targeted lncRNA	r10b0ADp3	0.893195	0.812485	0.951991	0.877712	1.00205	0.99347	0.987671	0.995908	1.02441	1.04304	1.07501	1.12658	0.98414	0.949216	0.979667	0.936676	0.995233	0.980683	1.00036	1.00036	0.980391	0.922966	0.982381	0.92282	0.961373	0.890229	1.01813	1.03299
959	DUBR	LINC00883	ASO_G0243701_AD_08	Targeted lncRNA	r10b0ADp3	0.9655	0.945372	0.9776	1.03597	1.02222	0.919246	1.00684	0.976333	1.02804	1.03875	1.05242	1.06855	1.00951	0.951726	0.998423	0.958892	0.99505	1.04225	1.00176	1.03167	0.979996	1.0576	0.97748	1.06369	0.980046	0.979974	1.00791	1.00789
960	DUBR	LINC00883	ASO_G0243701_AD_09	Targeted lncRNA	r10b0ADp3	1.00587	0.933215	0.984632	1.02062	0.981337	0.95448	0.98424	0.987964	1.05327	1.02785	1.08636	1.05241	0.98249	0.985824	0.972321	0.975897	1.00582	1.0043	1.01276	1.00991	0.988612	1.01911	0.995131	1.02387	0.962178	0.999739	1.01164	1.00529
961	LINC00886	LINC00886	ASO_G0240875_01	Targeted lncRNA	r3b2p3	0.941683	1.05394	0.882737	0.962793	0.943258	0.983831	0.983619	0.980375	0.993389	1.01896	0.995953	1.02681	0.898257	0.969948	0.910632	0.966339	0.963216	0.99085	0.958444	0.993096	0.992001	1.0005	0.990827	1.00481	0.94079	0.985389	0.973445	0.995526
962	LINC00886	LINC00886	ASO_G0240875_02	Targeted lncRNA	r3b2p3	0.097355	0.162039	0.585443	0.654956	0.840801	0.869381	0.934558	0.946223	1.15248	1.12718	1.33038	1.28892	0.69742	0.745224	0.674654	0.727769	0.841194	0.866774	0.881554	0.906322	0.807289	0.847856	0.824687	0.865265	0.685863	0.735009	1.04927	1.03381
963	LINC00886	LINC00886	ASO_G0240875_03	Targeted lncRNA	r3b2p3	0.950909	0.774165	0.896836	0.888515	1.03008	0.999294	0.996663	1.00302	0.966388	1.00731	1.0725	1.09724	0.965943	0.957963	0.9604	0.954254	0.950834	0.958721	0.970219	0.977064	0.941059	0.926434	0.929423	0.932277	0.929294	0.915412	1.00885	1.02852
964	LINC00886	LINC00886	ASO_G0240875_04	Targeted lncRNA	r3b2p3	0.98226	0.922205	0.892422	0.943744	1.0198	0.963911	0.990725	0.977806	0.977879	1.02229	1.00679	1.06011	0.951125	0.960352	0.946045	0.953717	0.954192	0.995404	0.95415	1.00094	0.967787	1.01377	0.963226	1.01747	0.941334	0.962729	0.985552	1.00473
965	LINC00886	LINC00886	ASO_G0240875_10	Targeted lncRNA	r3b2p3	1.05428	0.991388	0.905646	0.896551	0.987302	0.979349	1.00225	0.998789	0.95041	1.01122	0.992023	1.07889	0.94724	0.937956	0.946573	0.935321	0.972548	0.969145	0.963422	0.978409	0.987945	0.947525	0.982511	0.951315	0.953345	0.923274	0.982075	1.01697
966	LINC00899	LINC00899	ASO_G0231711_01	Targeted lncRNA	r2b1p1	0.998996	1.00023	1.01644	1.16871	1.0391	0.953781	1.00944	0.986676	0.967524	0.984699	0.971612	0.994605	1.03752	1.0383	1.03348	1.04853	0.987029	1.10673	0.987498	1.07309	1.00993	1.09994	1.00805	1.10257	1.02608	1.0699	0.987363	0.998857
967	LINC00899	LINC00899	ASO_G0231711_03	Targeted lncRNA	r2b1p1	0.977605	0.969959	1.00752	0.967598	0.9219	0.967651	0.993772	0.996532	1.03618	1.02803	1.03243	0.97034	0.957835	0.972134	0.963875	0.969555	1.03884	1.00063	1.03733	0.992403	1.02756	1.02356	1.03037	1.02151	0.973756	0.994274	1.00869	0.981976
968	LINC00899	LINC00899	ASO_G0231711_04	Targeted lncRNA	r2b1p1	1.03497	0.953027	0.866168	0.912498	0.834014	0.871548	0.952568	0.978388	1.10995	1.06646	1.151	1.08378	0.838822	0.887651	0.842447	0.890619	1.03153	1.01344	1.03282	1.01855	1.01525	1.00788	1.02964	1.01225	0.869364	0.911932	1.0217	1.01596
969	LINC00899	LINC00899	ASO_G0231711_05	Targeted lncRNA	r2b1p1	0.870055	0.881103	0.971499	0.955966	0.982627	0.970285	0.99888	1.00017	1.00056	1.02445	1.01225	1.02916	0.977675	0.964356	0.969093	0.965221	0.995604	0.998171	0.99544	1.00123	0.988867	0.98803	0.988355	0.992632	0.96984	0.964667	0.997362	1.00849
970	LINC00899	LINC00899	ASO_G0231711_06	Targeted lncRNA	r2b1p1	1.01008	0.964859	0.933048	1.01729	0.944221	0.936427	0.999213	0.981593	1.04466	1.02876	1.04987	1.02126	0.946163	0.961346	0.944884	0.969935	0.991638	1.02401	1.00171	1.01613	0.979759	1.04694	0.986217	1.059	0.94453	1.00384	1.01513	0.997738
971	LINC00909	LINC00909	ASO_G0264247_01	Targeted lncRNA	r9b8p3	0.974178	0.949455	0.986667	0.97245	1.00936	0.981008	1.00758	0.993533	0.972419	0.998364	0.986929	1.00017	0.993148	0.969923	0.99268	0.968596	1.00812	0.984755	1.00544	0.986149	0.992981	1.01112	0.992921	1.01602	0.983611	0.981494	0.996599	0.988819
972	LINC00909	LINC00909	ASO_G0264247_03	Targeted lncRNA	r9b8p3	0.831255	0.852831	1.00071	1.01258	0.962771	0.989272	0.991661	1.00318	0.986658	0.993	1.00126	1.01301	0.982291	0.998184	0.979846	0.997269	1.00702	1.00327	1.00235	1.00817	1.02797	1.00681	1.03556	1.00546	0.997633	0.992261	0.988323	1.00297
973	LINC00909	LINC00909	ASO_G0264247_04	Targeted lncRNA	r9b8p3	0.738214	0.672108	0.999577	1.03673	0.994038	0.9535	0.993234	0.978721	0.993127	1.02571	1.02994	1.04988	0.992143	0.969045	0.978569	0.957586	0.996458	0.997008	0.999458	1.00811	1.03767	1.05251	1.02939	1.05845	0.99144	0.986814	0.984098	0.993504
974	LINC00909	LINC00909	ASO_G0264247_05	Targeted lncRNA	r9b8p3	0.833102	0.784029	0.928376	0.99375	0.983617	1.00632	0.988119	1.00173	1.02227	0.988701	1.04878	1.02538	0.945351	0.99633	0.934514	0.988811	0.974101	0.986855	0.979558	0.99143	0.961377	1.00971	0.965346	1.01085	0.928813	0.995899	1.00552	0.995374
975	LINC00909	LINC00909	ASO_G0264247_09	Targeted lncRNA	r9b8p3	0.906265	0.940238	0.966019	1.01321	0.97954	0.990439	0.989779	1.00531	1.01515	1.0049	1.05908	1.01994	0.974577	1.00345	0.96427	0.997915	0.999218	1.0133	1.00573	1.00462	1.01718	1.02001	1.01211	1.01806	0.968626	1.00026	1.00223	0.994641
976	LINC00938	LINC00938	ASO_G0273015_01	Targeted lncRNA	r1b0p5	0.934197	0.914485	1.07893	1.00819	0.995085	0.956559	0.991509	0.989619	1.00398	1.02875	1.02999	1.01174	1.03388	0.975645	1.03486	0.975205	1.03259	1.01802	1.02501	1.0095	1.0483	1.03613	1.04207	1.03777	1.03501	0.994744	0.997703	0.993406
977	LINC00938	LINC00938	ASO_G0273015_02	Targeted lncRNA	r1b0p5	0.967159	1.13312	1.00497	0.940038	0.941202	0.931	0.986726	0.988028	1.03956	1.03653	1.05529	1.06593	0.966605	0.934566	0.967963	0.935501	1.04348	1.03469	1.03756	1.02228	1.02422	1.02278	1.02475	1.02271	0.970222	0.93542	1.01104	1.00399
978	LINC00938	LINC00938	ASO_G0273015_03	Targeted lncRNA	r1b0p5	0.969823	0.897748	0.959555	0.969931	0.982497	1.0326	0.9903	1.00961	1.00289	0.917023	1.0596	1.00863	0.981243	1.01191	0.973849	1.00632	1.00177	0.9848	1.01049	0.997138	0.998305	0.956598	0.998385	0.959192	0.965854	0.982454	1.01065	1.02242
979	LINC00938	LINC00938	ASO_G0273015_04	Targeted lncRNA	r1b0p5	1.03719	0.905491	0.881931	0.994844	0.932538	0.951622	0.988245	0.988409	1.07506	1.12576	1.14299	1.11747	0.920083	0.974824	0.90931	0.966718	0.999578	1.02961	1.01169	1.03875	0.957325	0.981953	0.964876	0.99229	0.887159	0.942562	1.03382	1.03025
980	LINC00938	LINC00938	ASO_G0273015_05	Targeted lncRNA	r1b0p5	0.832271	0.718249	0.97366	1.00677	0.772386	0.789749	0.945589	0.955769	1.12591	1.09157	1.16782	1.12724	0.847036	0.866767	0.854414	0.875905	1.09694	1.0993	1.0787	1.07685	1.10154	1.1082	1.10726	1.11135	0.905146	0.931133	1.02201	1.01746
981	LINC00938	LINC00938	ASO_G0273015_AD_04	Targeted lncRNA	r10b0ADp5	1.10989	1.09154	0.912556	0.993761	1.02686	0.982505	1.00041	1.00606	1.01799	0.974527	1.00907	1.00041	0.983788	0.994817	0.977314	0.99561	0.953348	0.99914	0.970257	1.00096	0.948101	1.00358	0.956799	1.00124	0.947071	0.986207	0.995325	0.995828
982	LINC00938	LINC00938	ASO_G0273015_AD_05	Targeted lncRNA	r10b0ADp5	1.01342	0.926516	0.943371	0.953552	0.938537	0.947363	0.994934	0.996291	1.03585	1.03004	1.05986	1.04811	0.936858	0.951717	0.936875	0.949063	0.993158	0.99591	1.00027	0.99546	0.99359	1.01005	0.999814	1.00955	0.938185	0.959654	1.01075	1.00432
983	LINC00938	LINC00938	ASO_G0273015_AD_07	Targeted lncRNA	r10b0ADp5	1.01309	0.916282	0.971972	1.01512	1.05484	1.03688	1.01201	1.00595	0.987469	1.01247	1.01406	0.976768	1.02684	1.02027	1.01866	1.01292	0.963043	0.98083	0.982319	0.991083	0.967818	1.01845	0.961252	1.02257	0.985274	1.01721	1.00691	0.983419
984	LINC00938	LINC00938	ASO_G0273015_AD_08	Targeted lncRNA	r10b0ADp5	0.970699	0.910052	0.991652	1.03136	1.0269	0.972798	1.00371	0.993956	1.00031	1.03622	1.02932	1.06797	1.01999	1.01002	1.01129	1.01012	0.994623	1.01524	1.00592	1.02441	0.991226	1.00726	0.992349	1.01459	0.98908	0.995886	1.00782	1.01833
985	LINC00938	LINC00938	ASO_G0273015_AD_10	Targeted lncRNA	r10b0ADp5	0.973329	0.900939	0.886949	0.912547	0.948558	0.976075	0.986134	0.98871	1.04875	1.04396	1.10163	1.07159	0.929172	0.93964	0.920359	0.938485	0.965589	0.973141	0.984714	0.978263	0.970433	0.97672	0.974482	0.981337	0.915887	0.928598	1.01444	1.01032
986	LINC00941	LINC00941	ASO_G0235884_01	Targeted lncRNA	r6b5p5	0.860418	0.850136	0.946173	0.90347	1.04517	0.955607	1.00219	0.98764	0.97164	1.05008	0.966364	1.05705	1.00163	0.927516	0.987884	0.922065	0.954712	0.959418	0.953444	0.971488	0.978005	0.968351	0.969385	0.970891	0.985075	0.925578	0.973984	1.00099
987	LINC00941	LINC00941	ASO_G0235884_02	Targeted lncRNA	r6b5p5	0.852574	0.804152	0.978181	0.965561	1.00544	1.00424	0.999718	0.999112	0.967354	1.00074	0.97674	1.03511	0.981207	0.985361	0.971805	0.97528	0.982858	0.981285	0.983365	0.987523	1.01792	0.999221	1.01798	0.999869	0.984107	0.968422	0.971389	0.997371
988	LINC00941	LINC00941	ASO_G0235884_04	Targeted lncRNA	r6b5p5	0.72215	0.663026	0.963627	0.934453	1.02211	1.00841	0.99713	0.988454	0.972093	1.02259	1.01995	1.06898	0.992497	0.971231	0.981032	0.954525	0.964835	0.958605	0.962041	0.974602	1.03057	0.975448	1.02029	0.969118	0.994172	0.938793	0.979114	1.00551
989	LINC00941	LINC00941	ASO_G0235884_07	Targeted lncRNA	r6b5p5	0.680798	0.692494	0.910628	0.890794	1.00851	0.995087	0.998406	1.00314	1.01042	1.01923	1.05199	1.0744	0.960241	0.95739	0.940254	0.950916	0.95743	0.943816	0.968441	0.973803	0.955012	0.921615	0.955905	0.918817	0.925359	0.921847	1.00402	1.02666
990	LINC00941	LINC00941	ASO_G0235884_08	Targeted lncRNA	r6b5p5	0.913693	0.805619	0.967527	0.921462	1.12512	1.05849	1.02725	1.00507	0.990442	1.0171	0.991217	1.04379	1.0606	0.997124	1.04882	0.972528	0.959402	0.937913	0.98162	0.964612	0.914119	0.937847	0.910163	0.934315	0.980856	0.945781	1.01744	1.00785
991	C10orf143	LINC00959	ASO_G0237489_02	Targeted lncRNA	r7b6p1	0.932356	0.929097	0.978913	0.974998	0.921528	0.921376	0.991271	0.994698	1.02735	1.06689	1.07308	1.06212	0.946259	0.950514	0.952918	0.954765	1.02773	1.03146	1.02431	1.02366	0.99926	0.998262	1.00127	1.00013	0.957241	0.961591	1.01809	1.01719
992	C10orf143	LINC00959	ASO_G0237489_03	Targeted lncRNA	r7b6p1	0.738401	0.716681	0.952781	0.995683	0.943011	1.00907	0.999731	0.991923	1.02554	1.01197	1.07277	1.04409	0.940827	1.00472	0.942709	0.992062	0.991159	0.97962	1.00958	0.985625	0.984034	1.02503	0.991693	1.02452	0.93696	1.00081	1.02862	1.00174
993	C10orf143	LINC00959	ASO_G0237489_04	Targeted lncRNA	r7b6p1	0.659889	0.78381	0.906486	0.895811	0.940077	0.924421	0.988801	0.984679	1.02191	1.04384	1.08704	1.11414	0.92296	0.901037	0.91921	0.893355	0.986017	0.978791	1.00111	1.00154	0.957525	0.96248	0.965828	0.972103	0.907811	0.893234	1.02407	1.02606
994	C10orf143	LINC00959	ASO_G0237489_05	Targeted lncRNA	r7b6p1	0.65879	0.682089	0.908647	0.966449	0.890009	0.970597	0.987217	1.00099	1.07266	1.01175	1.14711	1.07662	0.886136	0.967088	0.889664	0.961857	0.988791	1.00544	1.00812	1.019	0.962988	0.971577	0.97436	0.978683	0.886964	0.948809	1.04586	1.02577
995	C10orf143	LINC00959	ASO_G0237489_09	Targeted lncRNA	r7b6p1	0.551718	0.506641	0.833494	0.892782	0.865773	0.915298	0.96545	0.980364	1.08887	1.04487	1.18633	1.12953	0.836027	0.896068	0.836598	0.890004	0.970469	0.979423	0.973333	0.995817	0.950573	0.964212	0.961616	0.971526	0.849828	0.888395	1.03184	1.02029
996	C10orf143	LINC00959	ASO_G0237489_AD_01	Targeted lncRNA	r11b1ADp3	0.947296	0.923169	1.01521	0.982783	1.03476	1.00085	0.986853	0.998988	0.958398	0.971181	0.935238	0.967897	1.0187	0.990112	1.01723	0.989387	0.974361	0.977871	0.958652	0.973099	1.05421	1.00752	1.03845	1.00285	1.04312	0.998317	0.956848	0.978326
997	C10orf143	LINC00959	ASO_G0237489_AD_04	Targeted lncRNA	r11b1ADp3	0.930921	0.875476	1.00013	0.961183	1.0257	1.00125	1.00895	1.0065	1.00445	1.03691	1.0072	1.03483	1.01776	0.994206	1.00195	0.987831	0.970643	0.980874	0.983888	0.987601	0.991662	0.976287	0.992404	0.982218	1.00207	0.980176	0.997747	1.00989
998	C10orf143	LINC00959	ASO_G0237489_AD_05	Targeted lncRNA	r11b1ADp3	0.790329	0.795618	1.0117	1.09559	1.03579	1.0273	1.00461	1.00083	1.01471	1.009	1.01218	0.991073	1.02384	1.05631	1.01159	1.04415	0.989757	1.01898	0.988969	1.00454	0.981689	1.05212	0.974315	1.04429	1.00079	1.0575	0.998624	0.996343
999	C10orf143	LINC00959	ASO_G0237489_AD_07	Targeted lncRNA	r11b1ADp3	0.348759	0.331982	0.849413	0.792479	0.882894	0.89773	0.958487	0.966795	1.10968	1.09149	1.15416	1.14086	0.855812	0.839861	0.847741	0.828788	0.952929	0.918398	0.974249	0.938163	0.956841	0.920599	0.970854	0.929867	0.869514	0.856667	1.02945	1.02466
1000	C10orf143	LINC00959	ASO_G0237489_AD_09	Targeted lncRNA	r11b1ADp3	0.963639	1.00729	0.995603	1.02579	0.99621	1.02568	0.983392	0.99714	0.975907	0.994228	0.948734	0.961412	0.981696	1.03486	0.987768	1.03746	0.993196	1.00093	0.977491	0.979825	1.03244	1.02825	1.03407	1.02552	1.01996	1.05301	0.976837	0.98163
1001	LINC00963	LINC00963	ASO_G0204054_01	Targeted lncRNA	r3b2p6	0.956598	1.04603	0.923128	0.897402	0.896347	0.895143	0.965119	0.965623	1.03061	1.08788	1.04484	1.08601	0.898672	0.878556	0.915754	0.882214	1.01122	1.00635	1.00018	1.01071	1.0329	1.00544	1.03362	1.02074	0.941354	0.900001	0.993596	1.01018
1002	LINC00963	LINC00963	ASO_G0204054_02	Targeted lncRNA	r3b2p6	1.02614	1.03559	0.963642	0.917836	0.976	0.953251	0.997303	0.991126	1.0009	1.01786	0.981056	1.02405	0.969796	0.935478	0.9758	0.931622	0.99846	0.973249	0.989862	0.975735	0.991947	0.989603	0.996806	0.99803	0.982429	0.951294	0.998627	1.00333
1003	LINC00963	LINC00963	ASO_G0204054_05	Targeted lncRNA	r3b2p6	1.04925	0.954897	0.919083	0.95909	0.951335	0.964249	0.986305	0.986999	1.02886	1.022	1.04756	1.05165	0.940946	0.962442	0.944259	0.958949	0.987713	0.984209	0.987883	0.997616	0.983495	0.983494	0.98394	0.989831	0.942858	0.950801	1.00109	1.01513
1004	LINC00963	LINC00963	ASO_G0204054_06	Targeted lncRNA	r3b2p6	1.07509	1.00956	0.898216	0.912633	0.956795	0.952696	0.992333	0.990168	1.01364	1.02235	0.995798	1.04375	0.924787	0.931585	0.933871	0.941662	0.971745	0.996565	0.970372	0.996715	0.974174	0.957273	0.978272	0.96788	0.943279	0.926114	0.98695	1.01625
1005	LINC00963	LINC00963	ASO_G0204054_10	Targeted lncRNA	r3b2p6	0.971795	1.02667	1.01161	0.902817	1.01622	1.03849	0.995825	1.00537	1.00091	1.00709	1.00098	1.0175	1.02436	0.980365	1.02269	0.973741	1.01016	0.94951	1.00924	0.959421	1.00958	0.939141	1.01413	0.946811	1.01734	0.954269	0.999392	1.00294
1006	LINC00968	LINC00968	ASO_G0246430_01	Targeted lncRNA	r2b1p5	0.956056	1.02222	0.952542	1.0332	0.994786	1.04739	1.00404	1.00586	1.03108	0.98243	1.02729	0.990117	0.978671	1.0473	0.977569	1.03996	0.974872	1.00008	0.989481	1.00608	0.950385	1.00319	0.962479	0.99585	0.958018	1.03572	1.01497	1.00412
1007	LINC00968	LINC00968	ASO_G0246430_02	Targeted lncRNA	r2b1p5	0.929018	0.998838	1.00104	1.07201	0.989328	1.0453	0.998946	1.00337	1.03632	0.996207	1.06705	0.985693	0.992593	1.05791	0.988413	1.05211	1.00563	1.01582	1.01181	1.00631	0.992202	1.01314	0.991539	1.0162	0.983883	1.04268	1.02218	0.994378
1008	LINC00968	LINC00968	ASO_G0246430_03	Targeted lncRNA	r2b1p5	0.318001	0.363557	0.984539	0.948242	0.882617	0.881963	0.968638	0.968131	1.02439	1.03117	0.987726	0.976449	0.895806	0.879765	0.904641	0.884394	1.03824	1.00507	1.00052	0.983165	1.07306	1.05804	1.05844	1.05089	0.973642	0.962278	0.971141	0.96556
1009	LINC00968	LINC00968	ASO_G0246430_04	Targeted lncRNA	r2b1p5	0.577192	0.642757	0.906144	0.871614	0.849488	0.835381	0.960415	0.953075	1.10531	1.09755	1.1906	1.14247	0.862235	0.840373	0.866932	0.844834	1.04312	1.00674	1.04203	1.01307	1.00246	1.01835	1.0044	1.02378	0.876651	0.878504	1.03429	1.01422
1010	LINC00968	LINC00968	ASO_G0246430_05	Targeted lncRNA	r2b1p5	1.10162	1.07585	0.983225	0.968666	0.926938	0.966559	0.990037	0.978519	1.05603	0.996637	1.08424	0.997631	0.946525	0.948707	0.948662	0.95224	1.0275	0.99301	1.03169	0.99035	1.00696	1.02505	1.01749	1.0339	0.946331	0.976555	1.02375	0.988375
1011	LINC00968	LINC00968	ASO_G0246430_AD_03	Targeted lncRNA	r13b3ADp5	0.91107	0.912905	1.12185	1.04385	1.01568	1.05505	0.999277	1.01247	0.997885	1.00079	0.980563	0.986639	1.0694	1.06021	1.06436	1.05292	1.04971	1.00441	1.03465	0.997885	1.04638	1.01051	1.03669	0.997165	1.06845	1.04045	0.987822	0.991539
1012	LINC00968	LINC00968	ASO_G0246430_AD_04	Targeted lncRNA	r13b3ADp5	0.868372	0.916563	0.995531	1.01467	1.05482	1.07252	1.01164	1.01405	0.978767	0.982204	0.982907	0.953716	1.02288	1.04448	1.00453	1.02294	0.977712	0.987848	0.975024	0.974356	0.998829	1.02047	0.9862	0.99996	1.00036	1.03088	0.981727	0.976839
1013	LINC00968	LINC00968	ASO_G0246430_AD_05	Targeted lncRNA	r13b3ADp5	0.872271	0.829982	0.927604	1.02724	1.02317	1.03759	0.999506	1.00976	1.01717	0.966404	1.04592	0.994784	0.976058	1.03811	0.961993	1.03494	0.962973	0.999239	0.971621	0.997843	0.952113	1.00165	0.952124	0.992967	0.944457	1.00828	1.00692	1.0021
1014	LINC00968	LINC00968	ASO_G0246430_AD_08	Targeted lncRNA	r13b3ADp5	0.845436	0.821562	1.0234	1.01805	1.03915	1.01389	1.00895	0.997374	0.991802	0.986105	0.983509	1.01164	1.0328	1.01647	1.02326	1.00768	0.995308	1.01789	0.993478	1.00814	1.01869	1.01904	1.01331	1.01052	1.02949	1.00316	0.989757	0.996504
1015	LINC00968	LINC00968	ASO_G0246430_AD_10	Targeted lncRNA	r13b3ADp5	0.89135	0.949784	1.06491	1.03004	1.01407	1.01473	1.00105	0.992614	0.980105	1.00253	0.971016	1.02513	1.03293	1.01286	1.03165	1.0075	1.02062	1.02035	1.00741	1.02073	1.04748	1.02852	1.05034	1.02259	1.04023	0.987975	0.985421	1.00102
1016	LINC01023	LINC01023	ASO_G0272523_01	Targeted lncRNA	r14b9plusp2	0.94684	0.964306	1.01121	0.960562	1.08414	1.01654	1.01896	1.00189	1.00086	1.03266	1.01732	1.05098	1.06978	1.00044	1.06109	0.990723	0.984117	0.980209	0.993856	1.00056	0.938705	0.945893	0.936194	0.95147	1.00423	0.959924	1.02215	1.02919
1017	LINC01023	LINC01023	ASO_G0272523_06	Targeted lncRNA	r14b9plusp2	0.906354	0.904857	1.04982	1.01592	0.973986	0.95693	0.993087	0.998674	1.01558	1.03958	1.03793	1.07575	1.00876	0.980981	1.004	0.980636	1.01586	1.01427	1.01238	1.031	1.00749	0.990545	1.01	0.999418	1.01629	0.968315	1.02126	1.02949
1018	LINC01023	LINC01023	ASO_G0272523_08	Targeted lncRNA	r14b9plusp2	0.959355	0.896752	0.952867	0.903303	0.934713	0.912135	0.973408	0.981952	1.04603	1.06105	1.08065	1.11758	0.930933	0.904277	0.92503	0.905091	1.00128	0.986678	1.00983	1.00796	1.02789	0.962967	1.03428	0.976422	0.9497	0.904748	1.00628	1.03344
1019	LINC01023	LINC01023	ASO_G0272523_09	Targeted lncRNA	r14b9plusp2	0.954757	0.971984	1.07076	1.06336	1.03251	1.02506	1.00566	1.00416	0.99392	1.00163	0.983344	1.04103	1.06292	1.05075	1.05134	1.04239	1.02392	1.02464	1.01879	1.04056	1.02372	1.00094	1.01944	0.999139	1.04017	1.01692	0.99853	1.02192
1020	LINC01023	LINC01023	ASO_G0272523_10	Targeted lncRNA	r14b9plusp2	0.898089	0.97096	0.99579	0.964014	0.970557	0.978864	0.990799	0.993186	0.999456	1.03655	1.00888	1.03053	0.968134	0.963591	0.96475	0.964421	1.00991	0.988979	1.0082	1.00348	1.02919	1.00152	1.03233	1.00406	0.980615	0.965941	0.996028	1.00084
1021	LINC01085	LINC01085	ASO_G0248698_01	Targeted lncRNA	r14b9plusp5	0.949438	0.956306	0.936837	1.04532	1.03904	1.05998	0.999813	1.01573	1.00392	1.00347	0.974945	0.987832	0.988665	1.07056	0.976442	1.06368	0.949387	0.980452	0.953422	0.987686	0.981469	0.983329	0.990853	0.98034	0.991052	1.04284	0.983174	1.00044
1022	LINC01085	LINC01085	ASO_G0248698_04	Targeted lncRNA	r14b9plusp5	0.921263	0.918503	1.0474	0.948254	1.0364	1.0032	1.00312	1.00357	0.980326	1.0023	0.980405	1.01025	1.05111	0.981363	1.03901	0.972815	1.00119	0.977017	0.996874	0.983072	1.03509	0.984998	1.0231	0.983794	1.03876	0.965454	0.983576	0.995363
1023	LINC01085	LINC01085	ASO_G0248698_05	Targeted lncRNA	r14b9plusp5	0.972861	0.95562	0.924673	1.007	1.04937	1.03967	1.00612	1.01046	0.991328	0.997866	1.00029	1.02412	0.988966	1.03096	0.987038	1.02418	0.96241	0.977328	0.974968	0.992396	0.961001	0.976849	0.96078	0.982367	0.958323	1.00898	0.998755	1.01252
1024	LINC01085	LINC01085	ASO_G0248698_07	Targeted lncRNA	r14b9plusp5	0.79804	0.79917	1.00631	0.929329	1.03961	1.02841	0.985876	0.988354	1.0266	1.01674	1.06634	1.06203	1.02872	0.981784	1.01498	0.974479	0.972933	0.953989	0.980956	0.954939	0.972627	0.949923	0.965756	0.95102	1.01212	0.958334	0.999559	0.998827
1025	LINC01085	LINC01085	ASO_G0248698_08	Targeted lncRNA	r14b9plusp5	0.931609	0.948609	0.979859	0.965083	0.992137	1.03033	0.995445	1.00797	0.9878	1.0119	1.01108	1.01374	0.985353	1.00801	0.98328	0.994117	0.988828	0.962718	0.995732	0.976012	0.990796	0.971799	1.00305	0.96962	0.990476	0.978655	1.01333	0.995853
1026	Lipo	Lipo	ASO_Lipo	Mock Transfection	r9b8p6	1.03812	0.988287	1.02506	0.975198	0.966876	1.02906	0.988876	0.99401	1.01306	1.01325	1.01605	1.01568	0.990715	0.997784	0.992935	0.997826	1.01926	0.982888	1.02307	0.98893	1.04421	0.981296	1.04731	0.98788	1.01639	0.98744	0.997449	0.994628
1027	Lipo	Lipo	ASO_Lipo	Mock Transfection	r9b8p5	0.989344	0.98321	0.943046	0.966365	0.992047	1.0366	1.0028	1.00537	1.00744	0.962654	1.02286	0.967779	0.970595	1.0143	0.969599	1.01135	0.974056	0.971368	0.978494	0.965188	0.978956	0.96964	0.980791	0.968831	0.978308	1.005	0.999586	0.983709
1028	Lipo	Lipo	ASO_Lipo	Mock Transfection	r9b8p4	0.963752	0.892456	1.02665	0.985882	1.03459	1.01717	1.00761	0.999952	1.00258	0.991091	1.00808	0.998968	1.03425	1.00293	1.0263	1.00038	0.99792	0.999389	0.998758	0.989628	0.996792	0.989043	0.993819	0.989719	1.02026	0.998116	1.00139	0.999416
1029	Lipo	Lipo	ASO_Lipo	Mock Transfection	r9b8p3	0.965455	0.941539	0.967501	1.01864	0.968416	0.947068	0.996355	0.9877	0.998397	1.0079	1.03076	1.00683	0.965192	0.971841	0.963374	0.976895	1.00059	1.02359	1.01135	1.00636	0.988528	1.03736	0.994806	1.04748	0.969145	1.00588	1.00188	0.994324
1030	Lipo	Lipo	ASO_Lipo	Mock Transfection	r9b8p2	1.03314	1.00016	1.02066	1.02938	0.987312	1.01451	0.993608	1.01024	1.00126	0.988342	0.990803	0.986912	0.996125	1.0278	1.00534	1.02164	1.00457	0.993188	0.990886	1.00441	1.03278	0.987946	1.03321	0.984842	1.02908	1.00835	0.99331	1.00107
1031	Lipo	Lipo	ASO_Lipo	Mock Transfection	r9b8p1	1.00063	0.968111	0.985938	0.98365	1.03352	1.02659	1.00815	1.00764	0.973641	0.977776	0.952178	0.964739	1.01647	1.00787	1.01695	1.00301	0.969544	0.983174	0.969909	0.977606	0.979746	1.00296	0.975833	1.00612	1.00724	1.01449	0.98797	0.990629
1032	Lipo	Lipo	ASO_Lipo	Mock Transfection	r8b7p6	0.989993	1.02963	1.04418	0.981007	0.983561	1.04495	1.00174	1.00778	0.994074	1.0043	1.00642	0.988943	1.01199	1.02235	1.00837	1.01362	1.02497	0.964919	1.02564	0.978012	1.02306	0.974356	1.01553	0.973967	1.00182	1.00435	1.00143	0.995867
1033	Lipo	Lipo	ASO_Lipo	Mock Transfection	r8b7p5	1.02438	0.990419	0.989586	1.03817	1.00082	1.03165	1.00568	1.00675	1.03135	1.00799	1.01262	1.02413	0.999572	1.03402	1.00062	1.02955	0.995897	0.995742	1.00693	0.999887	0.975111	0.997404	0.981559	0.997799	0.99318	1.02459	1.00591	1.01206
1034	Lipo	Lipo	ASO_Lipo	Mock Transfection	r8b7p4	1.0302	0.982801	0.995907	1.02064	0.97221	1.02214	0.998488	1.01623	1.00558	0.963937	1.0406	1.02266	0.986884	1.03345	0.979417	1.0326	1.01749	0.978947	1.02073	0.995822	1.00284	0.965966	1.00228	0.967703	0.976907	1.02084	1.00756	1.02245
1035	Lipo	Lipo	ASO_Lipo	Mock Transfection	r8b7p3	1.00951	1.0168	0.964511	0.918422	0.926707	0.989258	0.987664	1.00319	1.04641	1.03245	1.06348	1.03693	0.94347	0.961491	0.946955	0.949615	1.02784	0.968734	1.01448	0.979888	1.00979	0.97246	1.00922	0.971031	0.949202	0.9429	1.01351	1.00142
1036	Lipo	Lipo	ASO_Lipo	Mock Transfection	r8b7p2	1.00629	0.980817	1.03125	1.0258	1.01373	0.979854	1.00322	0.998979	0.981709	0.998602	0.974487	0.996057	1.02532	0.995271	1.0332	1.00321	0.996253	1.01845	0.990157	1.00837	1.00706	1.01658	1.00669	1.02547	1.04075	1.01418	0.993751	1.00304
1037	Lipo	Lipo	ASO_Lipo	Mock Transfection	r8b7p1	1.00216	1.03416	1.01669	0.903382	0.980066	0.969904	0.989668	0.979282	1.01644	1.01868	1.02762	1.05831	0.992772	0.934669	0.987282	0.928545	1.02194	0.964139	1.01274	0.969301	1.02388	0.993654	1.02672	0.996968	0.998211	0.941028	0.999506	0.998069
1038	Lipo	Lipo	ASO_Lipo	Mock Transfection	r7b6p6	0.9988	0.953284	1.06811	0.979314	0.977145	0.965896	0.991106	1.005	1.00418	1.03043	1.00243	1.01766	1.02249	0.971809	1.02163	0.971363	1.03492	0.988863	1.02723	1.00103	1.06872	0.990308	1.07051	0.997624	1.03978	0.984559	1.00195	1.01027
1039	Lipo	Lipo	ASO_Lipo	Mock Transfection	r7b6p5	0.958639	0.921115	0.954614	0.928572	0.967122	1.00041	0.98919	0.993997	1.04313	1.02021	1.03212	1.01723	0.954448	0.963688	0.954531	0.96075	0.992701	0.969964	1.00406	0.971613	1.00195	0.947012	1.00991	0.954431	0.957621	0.943338	1.00568	1.00326
1040	Lipo	Lipo	ASO_Lipo	Mock Transfection	r7b6p4	0.997722	0.943956	0.960735	1.01621	0.974618	0.999691	0.982103	1.00047	1.00148	1.01439	1.00877	1.0274	0.957687	1.01127	0.956935	1.00885	0.984427	1.00268	0.989431	1.00563	1.00784	1.00883	1.0212	1.01567	0.98022	1.02234	0.994279	1.00712
1041	Lipo	Lipo	ASO_Lipo	Mock Transfection	r7b6p3	0.889309	0.957909	0.952816	0.961015	0.982459	0.984946	0.99722	0.981724	1.03111	1.00228	1.02309	1.01449	0.973592	0.961373	0.968606	0.963836	0.980746	0.971629	0.989559	0.984806	0.976393	1.00858	0.97364	1.01313	0.965688	0.98749	1.00394	0.992883
1042	Lipo	Lipo	ASO_Lipo	Mock Transfection	r7b6p2	0.987923	0.976238	0.965138	0.994929	1.01689	0.96627	1.00419	1.00035	0.985857	1.00625	0.96138	1.00468	1.00045	0.981725	0.996517	0.976203	0.979373	0.997338	0.982848	1.00199	0.97672	1.01005	0.977927	1.0057	0.990578	0.983084	0.991979	0.995881
1043	Lipo	Lipo	ASO_Lipo	Mock Transfection	r7b6p1	0.976551	0.950698	0.956435	0.976011	0.988762	0.993265	0.996781	1.00037	0.995302	0.986538	1.00588	1.02291	0.973074	0.98252	0.972577	0.986432	0.985427	1.00441	0.982359	1.00305	0.997217	0.99128	1.00097	0.996775	0.977569	0.984425	0.999141	1.00709
1044	Lipo	Lipo	ASO_Lipo	Mock Transfection	r6b5p6	0.994964	0.922939	0.98251	0.983926	0.967767	0.975278	0.996442	0.996882	1.02221	0.992374	1.05148	1.00423	0.975494	0.970982	0.977596	0.976201	1.00693	1.00457	1.01571	1.00891	1.00232	1.02396	1.00707	1.0275	0.970903	0.99312	1.01979	1.00222
1045	Lipo	Lipo	ASO_Lipo	Mock Transfection	r6b5p5	0.911962	0.977658	0.959878	1.01784	1.0356	1.04631	1.00888	1.00059	0.969542	0.995322	0.985353	0.982051	1.00796	1.03317	1.00129	1.02641	0.962842	0.999155	0.972232	0.994752	0.960506	0.99338	0.962106	0.991158	0.98814	1.03122	0.995779	0.997336
1046	Lipo	Lipo	ASO_Lipo	Mock Transfection	r6b5p4	0.992888	1.00433	0.94413	0.958401	1.02324	1.00521	1.01191	1.00433	0.987388	1.02639	1.01115	1.04656	0.991346	0.992446	0.985496	0.982963	0.970141	0.987858	0.973509	1.01086	0.972642	0.981614	0.969875	0.982047	0.970534	0.968867	1.00102	1.01451
1047	Lipo	Lipo	ASO_Lipo	Mock Transfection	r6b5p3	0.974627	0.980082	0.987915	1.03935	1.0102	1.01712	1.00946	1.00972	1.01377	0.986982	1.01521	1.0032	1.00892	1.03274	1.00337	1.0275	0.998215	1.01868	1.01205	1.01995	0.973612	0.978131	0.980511	0.983628	0.98929	1.00479	1.01906	1.01605
1048	Lipo	Lipo	ASO_Lipo	Mock Transfection	r6b5p2	0.959352	0.92559	1.05266	0.990402	1.00967	1.06264	0.994437	1.00422	1.01254	0.984391	0.994825	0.965431	1.02628	1.03633	1.02326	1.02933	1.01371	0.976428	1.00298	0.979891	1.04471	0.996417	1.0445	0.986686	1.03922	1.02219	0.985301	0.982463
1049	Lipo	Lipo	ASO_Lipo	Mock Transfection	r6b5p1	0.990523	0.952725	0.946784	0.892335	1.00248	0.990801	0.976923	0.991366	1.01337	1.03409	1.0401	1.09265	0.965215	0.944108	0.956943	0.929968	0.964868	0.938271	0.963397	0.957462	1.00079	0.957022	0.995937	0.95138	0.973381	0.931444	0.982816	1.00287
1050	Lipo	Lipo	ASO_Lipo	Mock Transfection	r5b3p6	1.02587	0.979438	1.04171	1.06682	0.925541	1.01903	0.973575	1.00033	1.04855	0.987934	1.0347	0.979696	0.973434	1.04155	0.973046	1.0344	1.05083	1.03786	1.04784	1.02781	1.0833	1.05211	1.08445	1.03502	1.00209	1.03679	1.00173	0.991818
1051	Lipo	Lipo	ASO_Lipo	Mock Transfection	r5b3p5	0.999793	0.956543	0.977481	0.996284	0.96589	0.979147	0.99014	0.991117	1.06929	0.991162	1.02713	1.00536	0.966327	0.985502	0.969501	0.984689	0.984559	1.00446	0.989847	1.00303	0.999065	1.01531	1.00369	1.02242	0.986726	0.992825	1.00086	0.996986
1052	Lipo	Lipo	ASO_Lipo	Mock Transfection	r5b3p4	0.91933	0.957607	0.967387	0.962953	0.996005	0.958052	1.00008	0.993924	0.998455	1.00866	1.01836	1.00902	0.99066	0.958259	0.98563	0.957597	0.989257	1.00066	0.992032	0.997579	0.9833	1.00546	0.982976	1.0064	0.982722	0.974307	1.00453	0.996051
1053	Lipo	Lipo	ASO_Lipo	Mock Transfection	r5b3p3	0.900903	1.08466	0.962362	0.954835	0.960151	0.995941	0.992068	0.992215	1.04944	1.01373	1.02442	1.01388	0.952923	0.96729	0.954997	0.964318	0.992548	0.983768	0.995507	0.991609	1.00199	0.988206	1.0108	0.998809	0.973655	0.965339	1.00385	0.998405
1054	Lipo	Lipo	ASO_Lipo	Mock Transfection	r5b3p2	1.10267	1.06807	1.0171	1.01617	1.00462	1.00465	1.00172	1.01089	0.9532	0.97203	0.964166	0.995283	1.00387	1.01458	1.01257	1.01873	0.999411	0.994517	0.990994	1.00114	1.02587	0.988242	1.02169	0.984924	1.02735	1.01292	0.994027	1.00911
1055	Lipo	Lipo	ASO_Lipo	Mock Transfection	r5b3p1	0.975372	1.07472	0.9297	1.02571	0.986732	1.00378	0.989553	0.997562	1.01735	0.978758	1.05785	0.997788	0.96334	1.02119	0.961913	1.01604	0.980618	1.00845	0.989069	1.00658	0.966851	1.01607	0.979599	1.0081	0.954397	1.01816	1.0194	0.997142
1056	Lipo	Lipo	ASO_Lipo	Mock Transfection	r4b4p6	1.04016	0.896808	0.942817	0.988762	0.956424	0.971979	0.976095	1.0008	1.04418	1.00922	1.05189	1.0227	0.933472	0.982878	0.927484	0.984283	0.984729	1.01238	0.990533	1.0041	1.01377	1.00071	1.02235	1.00038	0.94431	0.983029	0.993374	1.0006
1057	Lipo	Lipo	ASO_Lipo	Mock Transfection	r4b4p5	0.987607	0.932777	1.00441	1.01518	1.01553	1.01342	1.00062	1.00002	0.983126	1.01264	1.00742	1.00551	1.02536	1.01647	1.02208	1.01793	1.0097	1.00906	1.00937	1.0065	0.993656	1.00259	0.982312	1.00588	0.99786	1.01105	1.00019	1.00148
1058	Lipo	Lipo	ASO_Lipo	Mock Transfection	r4b4p4	0.925123	0.992059	1.04058	1.02901	0.930259	0.962648	0.992181	0.9898	1.02673	1.02169	1.02687	1.00739	0.975585	0.983278	0.976817	0.982284	1.02526	1.01626	1.01934	1.01212	1.05026	1.04661	1.05018	1.0551	1.007	1.01301	1.01433	0.996932
1059	Lipo	Lipo	ASO_Lipo	Mock Transfection	r4b4p3	0.999199	0.930227	0.969187	1.07794	1.01377	1.00856	1.00038	1.00865	0.995176	0.999324	1.00564	0.976652	0.998891	1.0531	0.994299	1.04993	0.976774	1.04195	0.989848	1.04056	0.99613	1.0467	0.996668	1.04516	0.982945	1.04548	0.996437	0.991446
1060	Lipo	Lipo	ASO_Lipo	Mock Transfection	r4b4p2	1.01081	0.935773	0.979961	1.07913	1.00908	1.03549	0.998864	0.995455	1.0028	1.01017	1.01107	0.972737	0.995057	1.05291	0.987257	1.05265	0.973664	1.01812	0.983508	1.00445	0.982232	1.04469	0.990942	1.04286	0.988785	1.06298	1.00253	0.983001
1061	Lipo	Lipo	ASO_Lipo	Mock Transfection	r4b4p1	1.03647	1.02014	1.0906	1.04181	1.06339	0.936284	1.01383	0.988924	0.987759	1.04178	0.957728	1.02846	1.08162	0.979132	1.08199	0.980567	1.02248	1.0435	1.01876	1.02869	1.0098	1.04978	1.01074	1.05462	1.07128	1.01717	1.00245	1.00487
1062	Lipo	Lipo	ASO_Lipo	Mock Transfection	r3b2p6	1.04981	0.9571	0.95063	0.946963	0.996604	1.10375	0.993665	1.01509	1.00879	0.999191	1.0369	0.997542	0.980598	1.03688	0.97079	1.02798	0.990313	0.940938	1.00133	0.958139	1.00214	0.919461	0.996074	0.926072	0.965739	0.979922	0.993949	1.01256
1063	Lipo	Lipo	ASO_Lipo	Mock Transfection	r3b2p5	1.03998	1.04367	0.887958	0.918479	0.949019	0.976039	0.978687	0.997843	0.999075	1.01608	1.03588	1.0521	0.910295	0.954744	0.910895	0.956326	0.969252	0.974116	0.97475	0.996579	0.987352	0.960109	0.997554	0.962553	0.93535	0.943888	0.992197	1.01634
1064	Lipo	Lipo	ASO_Lipo	Mock Transfection	r3b2p4	0.95631	0.981453	0.938408	1.00112	0.988216	0.979524	0.990977	0.989685	1.00159	1.03599	1.0313	1.02944	0.970645	0.986879	0.96275	0.982143	0.985954	1.01075	0.99336	1.01848	0.986391	1.00146	0.997184	1.00274	0.966348	0.980641	1.0036	1.00497
1065	Lipo	Lipo	ASO_Lipo	Mock Transfection	r3b2p3	0.998933	0.960743	0.91224	0.918209	1.0312	0.963477	1.00412	0.996794	1.01648	1.00768	1.00437	1.07024	0.983318	0.953773	0.981347	0.947107	0.943351	0.979884	0.960321	0.994453	0.941766	0.966226	0.948425	0.968145	0.968582	0.932223	1.00265	1.0155
1066	Lipo	Lipo	ASO_Lipo	Mock Transfection	r3b2p2	1.05873	0.939913	0.955849	1.05323	1.02606	1.00282	1.00995	1.01651	1.04043	1.00247	0.996917	1.01497	1.00074	1.0346	0.986255	1.03187	0.947928	1.01786	0.967706	1.02632	0.958958	1.01179	0.956432	0.999875	0.986978	1.01492	0.995368	1.01197
1067	Lipo	Lipo	ASO_Lipo	Mock Transfection	r3b2p1	0.963478	1.0576	0.93457	0.93648	0.939107	0.977748	0.976972	0.995298	1.02209	1.01098	1.01934	1.01684	0.924928	0.956716	0.935342	0.957662	1.0029	0.989283	0.991086	0.989469	1.02498	0.994631	1.03598	1.00167	0.970407	0.963382	0.999373	0.994778
1068	Lipo	Lipo	ASO_Lipo	Mock Transfection	r2b1p6	0.940635	0.976846	1.04886	0.998156	1.00334	1.01677	0.995016	0.99506	0.983359	1.01584	0.982725	1.00561	1.02364	1.01613	1.02545	1.01103	1.01983	0.98659	1.01465	0.987148	1.04176	0.999039	1.04594	1.00447	1.03066	1.02136	0.992195	0.993956
1069	Lipo	Lipo	ASO_Lipo	Mock Transfection	r2b1p5	1.03156	0.997022	0.960177	1.03793	1.01573	0.955532	1.01177	0.995922	1.00683	1.0165	1.02722	1.04284	0.991449	0.986973	0.986467	0.98989	0.966406	1.0355	0.979658	1.03699	0.94951	1.03107	0.951099	1.02534	0.965995	0.984293	1.02079	1.01231
1070	Lipo	Lipo	ASO_Lipo	Mock Transfection	r2b1p4	1.06042	1.00893	0.969935	0.961233	0.968772	0.985921	1.00029	0.996987	1.00643	1.0409	1.02509	1.04554	0.969005	0.975245	0.968112	0.974858	0.986552	0.984342	0.998607	0.992179	1.00778	0.96415	1.00758	0.968526	0.979772	0.969578	1.00194	1.01763
1071	Lipo	Lipo	ASO_Lipo	Mock Transfection	r2b1p3	0.980078	0.989126	1.00376	0.990932	1.04707	1.08295	1.01644	1.01452	0.973923	0.936521	0.95704	0.931121	1.02254	1.03967	1.01449	1.03304	0.980568	0.955121	0.987735	0.954497	1.00641	0.975181	0.998704	0.970002	1.01088	1.03315	0.982983	0.977419
1072	Lipo	Lipo	ASO_Lipo	Mock Transfection	r2b1p2	0.993142	1.01288	0.990881	0.942676	0.971138	0.967395	0.999049	0.995327	0.992531	1.00476	1.01475	1.0179	0.979171	0.954121	0.974195	0.954851	1.00636	0.990828	0.991618	0.993179	1.00623	0.990462	1	0.98914	0.984912	0.955983	0.997644	1.00108
1073	Lipo	Lipo	ASO_Lipo	Mock Transfection	r2b1p1	0.973019	0.974063	0.997123	1.0086	0.950068	0.998348	0.993717	0.993364	1.04131	1.00457	1.03614	1.00441	0.971229	1.00872	0.968189	1.00863	1.00445	1.01944	1.01324	1.01962	1.02341	1.02049	1.02254	1.02309	0.979726	1.00179	1.00545	0.995021
1074	Lipo	Lipo	ASO_Lipo	Mock Transfection	r1b0p6	0.953234	1.06396	1.01372	0.957359	1.00373	1.01026	1.00904	1.004	1.00591	1.00614	0.983635	1.0164	1.01556	0.987751	1.0109	0.986322	0.985503	0.970222	0.994215	0.981101	0.994882	0.965868	0.996218	0.973207	1.01759	0.977095	0.99576	1.01111
1075	Lipo	Lipo	ASO_Lipo	Mock Transfection	r1b0p5	1.0717	0.942042	0.93921	0.942843	0.912687	0.957902	0.981724	0.985255	1.04305	0.97415	1.07899	1.05239	0.923805	0.950288	0.922279	0.950604	1.00895	1.00842	1.02001	1.00326	1.00563	1.00253	1.00939	1.00198	0.928194	0.942843	1.01162	1.00344
1076	Lipo	Lipo	ASO_Lipo	Mock Transfection	r1b0p4	0.96999	0.937325	1.00475	1.02851	0.98158	1.02062	0.999711	1.00707	1.00561	1.02631	1.034	0.978696	0.993469	1.02865	0.997642	1.02774	1.0033	1.00157	1.01302	1.00133	0.989897	0.999859	0.997922	0.999073	0.985191	1.03209	1.01302	0.996213
1077	Lipo	Lipo	ASO_Lipo	Mock Transfection	r1b0p3	0.954331	0.974192	1.16589	1.04395	0.968818	1.00052	0.993407	0.998073	0.959568	1.00263	0.98509	0.973307	1.04152	1.01328	1.05015	1.01068	1.08435	1.01325	1.06347	1.0075	1.09942	1.02393	1.09352	1.03062	1.07542	1.03232	0.996617	0.992308
1078	Lipo	Lipo	ASO_Lipo	Mock Transfection	r1b0p2	1.06689	1.02203	0.987815	1.1327	1.03967	0.919711	1.01133	0.976685	0.963548	1.03007	0.967962	1.04841	1.03057	0.998418	1.02563	1.00466	0.976282	1.10733	0.974052	1.08211	0.982308	1.11373	0.983759	1.11215	1.02399	1.02909	0.993724	1.00494
1079	Lipo	Lipo	ASO_Lipo	Mock Transfection	r1b0p1	1.00205	1.01686	0.92625	1.13368	1.0427	0.929475	1.00703	0.989689	0.988028	1.00265	1.00858	1.02277	1.00279	1.01469	0.99336	1.02203	0.951236	1.08299	0.968222	1.07412	0.93949	1.10332	0.935195	1.09723	0.962398	1.04059	1.00397	1.00409
1080	Lipo	Lipo	ASO_Lipo	Mock Transfection	r15bALLp6	0.939289	1.02139	1.0601	1.03593	0.966064	0.975152	0.997837	0.996302	1.01217	1.0108	1.04441	1.02971	1.0098	1.00688	1.01067	1.00994	1.03581	1.03411	1.03587	1.02879	1.0236	1.02819	1.02282	1.02816	1.01802	1.00545	1.01823	1.0105
1081	Lipo	Lipo	ASO_Lipo	Mock Transfection	r15bALLp5	0.984708	0.979139	0.995086	1.0612	1.02252	1.02172	1.00348	1.00522	0.973573	1.00501	0.974126	0.981792	1.00748	1.04524	1.00249	1.04275	0.987702	1.0202	0.986448	1.00718	1.00811	1.01595	1.00171	1.01121	1.00589	1.03732	0.988379	0.997489
1082	Lipo	Lipo	ASO_Lipo	Mock Transfection	r15bALLp4	1.03197	0.732579	1.0099	0.821844	1.02926	1.03551	1.00043	0.994302	0.963478	0.978415	0.989018	0.972443	1.02171	0.918431	1.01901	0.911256	0.997956	0.906153	0.99891	0.916651	1.00419	0.923935	0.997605	0.921931	1.0111	0.912922	0.994409	0.968144
1083	Lipo	Lipo	ASO_Lipo	Mock Transfection	r15bALLp3	1.0601	0.953673	1.00894	0.913753	1.02778	0.990906	1.00713	0.980423	0.98895	0.980875	0.988102	0.970458	1.02351	0.932414	1.0233	0.928268	1.00681	0.959942	1.01213	0.958529	1.00686	0.999361	1.01069	0.996079	1.01937	0.963099	0.998147	0.969391
1084	Lipo	Lipo	ASO_Lipo	Mock Transfection	r15bALLp2	0.941524	0.950353	0.976882	0.983223	0.999903	0.967262	0.996515	0.990603	0.980708	1.02066	0.979167	1.03846	0.982925	0.972558	0.981217	0.968882	0.9656	0.991243	0.974558	0.999504	1.00614	0.987773	1.0049	0.988236	0.994566	0.96938	0.989146	1.00671
1085	Lipo	Lipo	ASO_Lipo	Mock Transfection	r15bALLp1	0.932058	0.933872	0.948604	1.00929	0.981727	1.01259	0.99906	1.00701	1.00572	1.01256	1.01056	0.978272	0.964136	1.018	0.964503	1.01858	0.98378	1.00048	0.987285	0.999807	0.972193	0.994148	0.970698	0.992077	0.956122	1.00984	1.00463	0.99191
1086	Lipo	Lipo	ASO_Lipo	Mock Transfection	r14b9plusp6	0.981931	0.99168	1.08885	1.05526	0.975296	1.03727	1.00793	1.00088	0.993487	0.967997	0.99853	0.988892	1.03585	1.04942	1.04682	1.04395	1.05028	1.00664	1.04215	1.0126	1.03015	1.0255	1.03099	1.02042	1.041	1.04873	1.01039	0.998218
1087	Lipo	Lipo	ASO_Lipo	Mock Transfection	r14b9plusp5	0.966198	0.949386	0.999115	0.965283	1.04972	0.976028	1.01409	0.995393	0.973062	1.01847	0.9703	1.04522	1.03136	0.962468	1.02679	0.955848	0.965801	0.977273	0.975785	0.981358	0.979485	0.981323	0.98459	0.987127	1.02364	0.966959	0.9985	1.00838
1088	Lipo	Lipo	ASO_Lipo	Mock Transfection	r14b9plusp4	1.0113	0.96861	1.0011	0.988633	0.984746	1.01796	1.00212	1.00179	0.995472	1.00777	1.00606	0.997067	1.00179	1.0078	1.00361	0.999954	1.00377	0.995998	0.997033	1.00469	0.998742	0.984816	1.0014	0.992822	0.996816	0.98774	1.00491	1.00589
1089	Lipo	Lipo	ASO_Lipo	Mock Transfection	r14b9plusp3	1.00922	0.974191	0.993672	1.02091	1.01617	1.02082	0.990352	1.01208	1.00525	0.995262	1.01217	0.990118	1.0011	1.03552	0.999136	1.03484	0.988255	0.998012	0.992737	1.00146	1.0085	0.984392	1.00917	0.980895	1.00474	1.01834	0.992564	1.00816
1090	Lipo	Lipo	ASO_Lipo	Mock Transfection	r14b9plusp2	1.00746	0.96311	0.963955	1.03301	0.942149	1.0265	0.986022	0.996776	1.02458	0.996704	1.04401	0.995681	0.946382	1.03491	0.946329	1.023	1.0003	1.00478	1.00173	1.00739	1.01026	1.01699	1.01938	1.01202	0.964296	1.01674	1.01278	0.990067
1091	Lipo	Lipo	ASO_Lipo	Mock Transfection	r14b9plusp1	0.984986	1.01239	0.985321	0.973446	1.06122	0.963742	1.00549	0.992687	0.977129	0.996848	0.988429	1.01306	1.02386	0.973917	1.01897	0.97206	0.981532	0.998618	0.982467	0.997454	0.986687	1.02253	0.982407	1.02192	1.00053	0.994027	0.988354	0.997262
1092	Lipo	Lipo	ASO_Lipo	Mock Transfection	r13b3ADp6	0.946501	0.967724	0.956197	0.989994	0.992678	1.01506	0.999401	0.993785	1.03235	1.0179	1.04	1.01505	0.976298	1.00568	0.967503	1.00003	0.993736	0.988732	0.993329	0.99082	0.968744	0.999748	0.968284	0.99502	0.956719	1.00143	1.00372	0.995002
1093	Lipo	Lipo	ASO_Lipo	Mock Transfection	r13b3ADp5	0.947839	0.973611	0.95354	1.06292	1.04263	0.97229	1.00982	0.997486	0.98971	1.00808	1.01195	1.03195	1.01108	1.01454	0.999561	1.01534	0.970492	1.03575	0.990124	1.03287	0.943289	1.02449	0.940334	1.02219	0.974011	1.01957	1.01434	1.01346
1094	Lipo	Lipo	ASO_Lipo	Mock Transfection	r13b3ADp4	0.972689	0.998326	1.02873	0.961059	0.984354	1.01375	0.989885	0.993326	1.00947	0.966929	1.02633	0.959977	0.998859	0.982877	0.997084	0.980032	1.00245	0.97424	1.00276	0.966927	1.035	1.00371	1.03762	1.00194	1.01729	1.00058	0.999484	0.98071
1095	Lipo	Lipo	ASO_Lipo	Mock Transfection	r13b3ADp3	1.02877	0.974767	1.06916	0.95574	1.04065	1.0408	1.01144	1.00664	0.970867	0.974454	1.01151	1.00665	1.06195	1.00011	1.05369	0.99377	1.01298	0.962566	1.01374	0.972154	0.994918	0.96601	0.991348	0.962923	1.0437	0.977486	1.01111	1
1096	Lipo	Lipo	ASO_Lipo	Mock Transfection	r13b3ADp2	0.931004	0.982521	0.974246	1.04051	0.977653	1.02396	1.00269	1.00804	0.998849	0.996628	1.00463	0.969442	0.976884	1.02754	0.976843	1.0275	0.989444	1.00486	0.9929	1.00582	0.990181	1.00155	0.997175	1.00894	0.988328	1.02354	1.00412	0.995313
1097	Lipo	Lipo	ASO_Lipo	Mock Transfection	r13b3ADp1	1.00882	0.983466	0.928412	1.01048	1.04722	1.00542	1.00699	0.998962	0.973711	1.0345	0.997081	1.01001	0.999011	1.0023	0.99419	1.00515	0.951947	0.996372	0.965799	0.983468	0.970131	0.998912	0.964837	0.996527	0.984515	1.00513	0.991925	0.991717
1098	Lipo	Lipo	ASO_Lipo	Mock Transfection	r12b2ADp6	1.05624	1.0292	0.877715	1.00045	1.01567	0.999962	1.00512	0.998295	1.00525	1.01656	1.02228	1.00499	0.953969	1.00186	0.951383	1.00307	0.954627	1.00409	0.969305	1.01228	0.929301	1.023	0.926271	1.02434	0.921739	1.00303	1.005	0.998723
1099	Lipo	Lipo	ASO_Lipo	Mock Transfection	r12b2ADp5	1.00075	1.03639	1.03953	1.0238	1.0019	1.0201	1.001	0.994622	0.980032	0.99152	0.990976	0.989948	1.01598	1.02361	1.02222	1.02353	1.00926	1.01363	1.00995	1.0062	0.999139	1.02225	1.0082	1.01509	1.01457	1.02272	1.00249	0.994606
1100	Lipo	Lipo	ASO_Lipo	Mock Transfection	r12b2ADp4	0.960483	0.994313	1.06804	0.980194	1.01338	0.980645	0.995665	0.991991	0.990434	1.00966	0.998432	1.02344	1.03333	0.983067	1.02657	0.979964	1.0409	0.999238	1.04179	1.00412	1.03161	1.00686	1.03112	1.00402	1.01694	0.987435	1.00665	1.00345
1101	Lipo	Lipo	ASO_Lipo	Mock Transfection	r12b2ADp3	0.998105	1.02122	0.941263	0.985349	1.02172	1.00776	1.01036	1.00149	0.99858	1.01881	1.01749	1.02881	0.996975	1.00576	0.991129	0.997437	0.975765	1.00144	0.98261	0.995359	0.947728	0.983599	0.946093	0.983448	0.966633	0.993275	1.0088	1.01061
1102	Lipo	Lipo	ASO_Lipo	Mock Transfection	r12b2ADp2	1.02817	0.980785	1.01632	1.03496	0.951794	0.941889	0.99055	0.990573	1.02146	1.02392	1.01074	1.0444	0.975733	0.97463	0.981898	0.973155	1.03086	1.02517	1.03096	1.02713	1.04526	1.02957	1.03801	1.03881	0.991331	0.994901	0.998175	1.01353
1103	Lipo	Lipo	ASO_Lipo	Mock Transfection	r12b2ADp1	1.04607	0.961552	0.933706	0.997276	1.0009	1.05199	0.99159	1.01448	1.00459	0.980044	0.99815	0.985582	0.963847	1.02545	0.963451	1.02325	0.964994	0.978351	0.967451	0.997476	0.977031	0.964678	0.98153	0.964097	0.971354	1.00369	0.997401	1.01592
1104	Lipo	Lipo	ASO_Lipo	Mock Transfection	r11b1ADp6	0.98254	0.950812	0.996638	0.94311	0.973349	0.95976	1.00041	0.992891	1.0083	1.03922	1.04002	1.06269	0.990643	0.948531	0.993815	0.945874	1.02494	0.981643	1.03099	0.996743	0.991974	0.960646	0.995364	0.973346	0.971675	0.949608	1.02255	1.02312
1105	Lipo	Lipo	ASO_Lipo	Mock Transfection	r11b1ADp5	0.993803	0.958082	0.965813	0.989742	1.00747	1.01728	1.00107	1.01496	0.984679	0.996527	0.973202	0.975928	0.990232	1.013	0.989385	1.00624	0.979897	0.990991	0.971074	0.992223	0.99459	0.993078	0.995463	0.989066	0.9958	0.998137	0.987093	0.992549
1106	Lipo	Lipo	ASO_Lipo	Mock Transfection	r11b1ADp4	1.00195	0.910248	0.997257	0.935766	0.998795	0.9891	0.993742	0.996601	0.990689	0.990759	1.00024	1.00054	1.00339	0.963881	1.00348	0.956968	0.985486	0.965576	0.993493	0.961923	1.00917	0.979624	1.00677	0.974826	1.00549	0.970577	0.99314	0.987489
1107	Lipo	Lipo	ASO_Lipo	Mock Transfection	r11b1ADp3	1.05969	1.04231	0.942564	0.921554	0.99146	0.996202	0.996075	0.99731	1.0014	1.03339	1.00079	1.01674	0.97618	0.959785	0.979466	0.956703	0.991814	0.961338	0.985475	0.970021	0.968174	0.948938	0.973746	0.950676	0.970123	0.948106	1.00332	1.00518
1108	Lipo	Lipo	ASO_Lipo	Mock Transfection	r11b1ADp2	0.991856	1.02147	1.07419	1.00127	0.988949	1.02265	1.00388	1.00124	1.03001	1.0289	1.0068	1.0431	1.02995	1.00916	1.0285	1.00277	1.02743	0.999056	1.03453	1.00129	1.03711	0.989247	1.03901	0.992612	1.03611	0.998612	1.00108	1.01494
1109	Lipo	Lipo	ASO_Lipo	Mock Transfection	r11b1ADp1	0.949978	0.947984	0.973136	1.04333	1.00524	0.975525	1.00562	0.980696	0.973151	1.0053	0.98754	1.00568	0.997041	1.0022	0.998368	0.997936	0.985874	1.01271	0.996212	1.01201	0.980152	1.05493	0.980814	1.05264	0.991314	1.02681	1.00434	0.991754
1110	Lipo	Lipo	ASO_Lipo	Mock Transfection	r10b0ADp6	1.02479	0.957523	0.974212	0.955115	0.981056	1.02825	0.992392	1.01346	1.03279	1.01037	1.05314	1.03166	0.966881	1.00245	0.962806	0.994845	0.998765	0.960769	1.00008	0.979741	0.986437	0.943488	0.99324	0.946121	0.959121	0.972135	1.01489	1.0179
1111	Lipo	Lipo	ASO_Lipo	Mock Transfection	r10b0ADp5	1.01328	1.00243	0.938343	1.04494	0.991167	1.03732	0.999217	1.01048	1.02702	1.01512	1.04601	0.97603	0.96846	1.04992	0.965482	1.03881	0.976679	1.00712	0.98722	0.998723	0.962025	0.996314	0.95997	0.996961	0.951471	1.03305	1.01139	0.991049
1112	Lipo	Lipo	ASO_Lipo	Mock Transfection	r10b0ADp4	1.01151	0.987629	0.998877	1.1316	0.981712	0.989036	0.994918	0.998406	1.00748	0.989693	1.04431	1.00669	0.991509	1.04706	0.992159	1.05031	1.00285	1.04711	1.00676	1.03554	0.988903	1.04804	0.998618	1.04526	0.983923	1.05347	1.01652	1.00962
1113	Lipo	Lipo	ASO_Lipo	Mock Transfection	r10b0ADp3	0.997339	1.00677	0.915845	0.946438	0.937543	1.02471	0.98732	1.00373	1.04812	0.976649	1.08604	1.02235	0.925391	0.990401	0.926454	0.984634	0.98224	0.966243	0.99834	0.974403	0.967455	0.949683	0.97948	0.949306	0.926465	0.972972	1.01879	1.01282
1114	Lipo	Lipo	ASO_Lipo	Mock Transfection	r10b0ADp2	0.995469	0.966344	1.05951	0.977774	1.0538	1.02409	1.01431	1.00593	0.985978	0.999476	0.981395	1.017	1.05517	1.00845	1.04438	1.006	0.994925	0.986467	1.00473	0.988885	0.994347	0.974986	0.990488	0.976207	1.0395	0.996259	1.00952	1.00737
1115	Lipo	Lipo	ASO_Lipo	Mock Transfection	r10b0ADp1	1.02381	0.985476	0.993164	1.04954	0.992714	0.989033	1.00568	0.998127	0.995799	1.00298	1.00493	1.00085	0.995135	1.01509	0.993765	1.02167	0.995877	1.03249	0.99592	1.02759	0.980019	1.04088	0.985519	1.04486	0.996773	1.03316	1.01258	0.998186
1116	PPM1F-AS1	LL22NC03-86G7.1	ASO_G0224086_03	Targeted lncRNA	r4b4p6	0.889879	1.01946	1.01369	1.14251	0.978785	0.931265	1.00565	0.987784	1.04097	1.0432	1.02994	0.99884	0.999284	1.01534	0.995723	1.02781	1.01724	1.09458	1.02679	1.07632	1.00644	1.09669	1.01037	1.10074	0.991006	1.05747	1.01033	1.00466
1117	PPM1F-AS1	LL22NC03-86G7.1	ASO_G0224086_04	Targeted lncRNA	r4b4p6	1.1172	1.03336	0.949327	1.0859	0.906792	0.995002	0.982951	1.00551	1.04756	0.960355	1.08609	0.968011	0.927247	1.04127	0.927239	1.04194	1.02057	1.03002	1.03114	1.02119	0.997787	1.04719	1.01513	1.0457	0.928907	1.06524	1.02338	0.999922
1118	PPM1F-AS1	LL22NC03-86G7.1	ASO_G0224086_05	Targeted lncRNA	r4b4p6	0.949336	0.889535	0.927493	1.11493	0.986346	0.987793	0.994575	1.00106	1.03367	1.05671	1.06635	1.00144	0.957867	1.05472	0.941326	1.06193	0.968606	1.05577	0.98294	1.06349	0.954391	1.03823	0.96136	1.0486	0.940826	1.05465	1.01597	1.01599
1119	PPM1F-AS1	LL22NC03-86G7.1	ASO_G0224086_06	Targeted lncRNA	r4b4p6	1.00806	1.11157	0.983267	1.13789	0.996711	1.06397	0.99773	1.00746	1.04836	0.946674	1.06693	0.933922	0.997356	1.09373	0.986367	1.1009	1.00908	1.047	1.01318	1.02775	0.97815	1.05168	0.978803	1.05117	0.972512	1.10351	1.0176	0.995838
1120	PPM1F-AS1	LL22NC03-86G7.1	ASO_G0224086_09	Targeted lncRNA	r4b4p6	1.11572	0.965573	0.961193	0.982039	0.95103	0.948064	0.991924	0.995569	1.05067	1.02366	1.04729	1.05564	0.961141	0.972814	0.962752	0.979946	1.01283	1.0294	1.00846	1.02229	0.99905	0.983227	1.00442	0.99345	0.964037	0.982127	1.00967	1.02513
1121	LOXL1-AS1	LOXL1-AS1	ASO_G0261801_01	Targeted lncRNA	r9b8p6	0.917813	0.991723	0.997023	0.971867	1.03808	0.988275	1.0042	0.991183	1.00785	0.998664	1.03429	1.01826	1.02916	0.974861	1.02202	0.976368	0.992741	0.995408	1.00794	0.997952	0.975034	1.01063	0.980337	1.00577	0.991952	0.981967	1.01859	0.993893
1122	LOXL1-AS1	LOXL1-AS1	ASO_G0261801_02	Targeted lncRNA	r9b8p6	0.90964	0.877227	1.04401	0.935519	1.03644	1.04367	0.998836	0.997894	0.964858	1.00115	0.982654	1.03354	1.03759	0.994343	1.04025	0.986496	1.00816	0.978611	1.00439	0.986774	1.03192	0.981313	1.03465	0.972586	1.04211	0.955918	0.989995	0.99546
1123	LOXL1-AS1	LOXL1-AS1	ASO_G0261801_04	Targeted lncRNA	r9b8p6	0.788097	0.82179	0.974291	1.00756	1.01958	1.04979	0.994709	1.00744	1.00983	0.993008	1.01718	0.998319	0.988336	1.03588	0.984506	1.02551	0.97889	0.988677	0.993574	0.99444	0.997129	0.991386	1.0009	0.983727	0.981336	1.00757	1.00205	0.9948
1124	LOXL1-AS1	LOXL1-AS1	ASO_G0261801_07	Targeted lncRNA	r9b8p6	0.822726	0.906255	0.994011	0.998226	0.96387	1.00115	0.990456	0.990207	1.03967	1.0154	1.08572	1.0246	0.978454	0.986863	0.966964	0.983036	1.00398	0.990094	1.01558	0.985597	1.02458	1.02181	1.02424	1.01762	0.975178	1.00823	1.0148	0.991036
1125	MAGI2-AS3	MAGI2-AS3	ASO_G0234456_01	Targeted lncRNA	r6b5p3	0.949125	0.979277	1.06144	1.06827	1.13101	1.11292	1.03081	1.02041	0.886475	0.969071	0.885006	0.934812	1.11379	1.1033	1.11366	1.09381	0.975497	0.992009	0.971427	0.983178	0.971355	0.987719	0.952198	0.971381	1.0845	1.07386	0.979943	0.979172
1126	MAGI2-AS3	MAGI2-AS3	ASO_G0234456_02	Targeted lncRNA	r6b5p3	0.804219	0.81787	1.06058	0.987806	1.00638	1.00615	0.99996	1.00377	1.01512	1.02387	1.03153	1.03457	1.03535	1.00158	1.02965	0.996799	1.02775	0.996046	1.03262	1.00714	1.02448	0.972441	1.02987	0.973588	1.01963	0.97943	1.00862	1.01378
1127	MAGI2-AS3	MAGI2-AS3	ASO_G0234456_03	Targeted lncRNA	r6b5p3	0.730248	0.724241	0.910036	0.952402	0.934495	0.961868	0.983947	0.991337	1.06302	1.02238	1.129	1.08009	0.921275	0.960643	0.911313	0.95176	1.00156	0.998577	0.991236	1.0083	0.976285	0.99053	0.978435	0.990581	0.910219	0.943589	1.0202	1.0127
1128	MAGI2-AS3	MAGI2-AS3	ASO_G0234456_04	Targeted lncRNA	r6b5p3	0.76149	0.823237	1.01302	1.14234	1.09193	1.05263	1.01069	1.01775	0.9924	0.949793	1.04046	0.964947	1.05817	1.09852	1.03472	1.09873	0.964371	1.05251	0.983919	1.03475	0.935316	1.05402	0.934057	1.04637	0.996357	1.08203	1.02582	0.993813
1129	MAGI2-AS3	MAGI2-AS3	ASO_G0234456_06	Targeted lncRNA	r6b5p3	0.747585	0.786949	0.968741	0.898497	1.01827	0.947502	1.00518	0.990929	1.01959	1.06983	1.06494	1.09839	1.00104	0.918846	0.992864	0.909747	0.99564	0.962873	1.01433	0.980572	0.953631	0.964326	0.961354	0.976291	0.962158	0.916036	1.02491	1.01504
1130	MAPKAPK5-AS1	MAPKAPK5-AS1	ASO_G0234608_03	Targeted lncRNA	r6b5p4	0.93509	0.992053	0.970942	0.998196	1.01841	1.04043	0.992827	1.01155	0.991793	0.97063	0.961442	0.983579	0.990065	1.02524	0.977282	1.01646	0.953207	1.00679	0.95946	1.00541	1.03173	0.993101	1.01575	0.990249	1.00095	0.999811	0.950338	0.989431
1131	MAPKAPK5-AS1	MAPKAPK5-AS1	ASO_G0234608_05	Targeted lncRNA	r6b5p4	0.923247	0.930325	0.971893	0.970193	1.05148	1.09625	0.975419	1.01252	0.978005	0.949492	0.958347	0.964101	1.00242	1.04441	0.985075	1.02832	0.923391	0.943735	0.917555	0.959899	1.04722	0.975532	1.01616	0.960457	1.0256	1.00606	0.9414	0.979359
1132	MAPKAPK5-AS1	MAPKAPK5-AS1	ASO_G0234608_06	Targeted lncRNA	r6b5p4	0.27553	0.27355	0.836685	0.827228	0.914024	0.915281	0.976458	0.970149	1.08817	1.10265	1.15591	1.15333	0.866928	0.862589	0.859072	0.841337	0.943268	0.92443	0.949048	0.946088	0.932804	0.937386	0.939369	0.945187	0.872354	0.868625	1.01841	1.01044
1133	MAPKAPK5-AS1	MAPKAPK5-AS1	ASO_G0234608_07	Targeted lncRNA	r6b5p4	0.911495	0.924051	0.997613	0.960191	1.01646	1.00257	0.987181	0.995792	0.987264	1.01402	0.937919	1.03551	0.973758	0.98071	0.956915	0.970691	0.947355	0.981787	0.943059	0.991592	1.04991	0.994918	1.03481	1.00153	1.01516	0.975257	0.948776	1.00357
1134	MAPKAPK5-AS1	MAPKAPK5-AS1	ASO_G0234608_09	Targeted lncRNA	r6b5p4	0.924236	0.949408	0.940648	0.996971	1.07209	1.06649	1.00948	1.00888	0.966768	0.985636	0.9745	0.991464	0.995953	1.02327	0.977791	1.01273	0.927418	0.962943	0.95081	0.9749	0.965589	1.00273	0.950344	0.993062	0.960207	1.0081	0.970278	0.986928
1135	MAPKAPK5-AS1	MAPKAPK5-AS1	ASO_G0234608_AD_01	Targeted lncRNA	r11b1ADp3	0.770111	0.77152	0.899668	0.955617	0.995844	1.04207	0.98349	0.993014	0.993918	0.983179	0.977146	0.964726	0.940598	0.996616	0.934912	0.987598	0.933228	0.969421	0.930603	0.954485	0.97866	0.999203	0.972448	0.990599	0.962001	1.01184	0.96998	0.966445
1136	MAPKAPK5-AS1	MAPKAPK5-AS1	ASO_G0234608_AD_04	Targeted lncRNA	r11b1ADp3	0.593662	0.538708	0.912052	0.989156	1.0665	1.14321	0.999669	1.02232	0.980327	0.972145	0.987132	0.966992	0.995686	1.07302	0.98534	1.04804	0.920074	0.946889	0.93068	0.962997	0.95527	0.943092	0.955956	0.932181	0.984555	1.001	0.991512	0.993759
1137	MAPKAPK5-AS1	MAPKAPK5-AS1	ASO_G0234608_AD_05	Targeted lncRNA	r11b1ADp3	0.814053	0.791217	0.930853	1.00181	0.96178	1.01745	0.986229	0.991279	1.03513	0.99485	1.04919	0.995557	0.936492	0.994873	0.927423	0.986129	0.96603	0.96941	0.962301	0.975253	0.99563	1.02271	0.997415	1.01544	0.947876	1.0052	1.00052	0.981312
1138	MAPKAPK5-AS1	MAPKAPK5-AS1	ASO_G0234608_AD_08	Targeted lncRNA	r11b1ADp3	0.883858	0.851505	1.02786	1.06728	1.03805	1.08991	1.00044	1.00274	0.991887	0.960449	0.98597	0.919	1.03365	1.0754	1.02947	1.06991	0.991942	0.980937	0.985281	0.972793	1.02339	1.04231	1.01589	1.02852	1.03266	1.07531	0.992624	0.965544
1139	MAPKAPK5-AS1	MAPKAPK5-AS1	ASO_G0234608_AD_09	Targeted lncRNA	r11b1ADp3	0.890782	0.928512	1.02552	1.01303	1.05065	0.995409	1.00489	0.99475	0.972863	1.0172	0.948442	1.0137	1.03349	1.00181	1.0276	0.996689	0.979945	0.990564	0.972177	0.993337	1.03175	1.01998	1.02543	1.01301	1.03452	1.01029	0.975419	0.991588
1140	MEG3	MEG3	ASO_G0214548_01	Targeted lncRNA	r1b0p1	0.341379	0.502574	0.569176	0.601372	0.615694	0.634478	0.867047	0.880376	1.32743	1.29186	1.58054	1.49963	0.570212	0.596734	0.576034	0.600744	0.980386	0.989127	1.00199	1.01056	0.863699	0.901587	0.902554	0.936158	0.592517	0.630381	1.09928	1.08098
1141	MEG3	MEG3	ASO_G0214548_03	Targeted lncRNA	r1b0p1	0.98456	0.954896	0.965151	0.99384	0.998925	0.980399	1.00312	0.993816	1.01245	1.04231	1.03497	1.04918	0.998219	0.994122	1.00073	0.993133	0.989395	0.996715	1.0028	1.00771	0.961066	0.987283	0.966319	0.993547	0.978846	0.989432	1.01877	1.01203
1142	MEG3	MEG3	ASO_G0214548_04	Targeted lncRNA	r1b0p1	1.06111	1.06817	1.05362	0.887024	1.00723	0.987506	1.00495	0.995865	0.989236	1.01297	1.02109	1.04978	1.0394	0.947517	1.04073	0.947612	1.02524	0.935931	1.04235	0.95987	1.0028	0.928218	0.99935	0.949558	1.00793	0.934081	1.02025	1.01813
1143	MEG3	MEG3	ASO_G0214548_05	Targeted lncRNA	r1b0p1	1.02692	1.05922	1.05162	1.04645	0.955517	0.928992	0.999079	0.987795	1.07135	1.02586	1.07738	1.07356	1.0074	0.986074	1.00462	0.989037	1.05166	1.03923	1.05389	1.04045	1.02164	1.02818	1.02561	1.03537	0.995469	0.989772	1.01936	1.02313
1144	MEG3	MEG3	ASO_G0214548_06	Targeted lncRNA	r1b0p1	0.886456	0.859867	0.928253	0.946238	0.849766	0.845978	0.969567	0.965981	1.08404	1.10233	1.15358	1.15399	0.883548	0.886016	0.881796	0.888333	1.04068	1.03987	1.04183	1.04321	1.03475	1.03666	1.04653	1.04619	0.894824	0.90292	1.02726	1.0239
1145	MEG3	MEG3	ASO_G0214548_AD_06	Targeted lncRNA	r10b0ADp1	1.03473	1.05244	1.04499	1.05123	0.988372	1.04195	1.00158	1.0086	0.986206	0.950002	1.0053	0.936479	1.01882	1.05096	1.02226	1.04919	1.02408	1.00111	1.03084	1.00395	1.01355	1.02659	1.01593	1.0131	1.01405	1.0446	1.00936	0.97728
1146	MEG3	MEG3	ASO_G0214548_AD_07	Targeted lncRNA	r10b0ADp1	0.950543	0.878644	1.01229	0.932426	1.00032	0.956891	0.995592	0.985945	0.993079	1.0284	1.04522	1.08828	1.00113	0.939914	0.991887	0.935619	0.995816	1.01147	1.00788	1.01964	1.00497	0.982588	1.00921	0.98604	0.989196	0.925941	1.00778	1.01851
1147	MEG3	MEG3	ASO_G0214548_AD_08	Targeted lncRNA	r10b0ADp1	0.892505	0.897971	1.05011	1.01391	1.00784	0.981512	1.00005	0.996258	0.986409	0.988889	0.997177	1.02821	1.02293	0.998616	1.01605	0.998355	1.01927	1.01909	1.0046	1.01503	1.04302	1.0096	1.04816	1.00346	1.03303	0.988215	0.989547	1.00306
1148	MEG3	MEG3	ASO_G0214548_AD_09	Targeted lncRNA	r10b0ADp1	0.763035	0.754711	1.01451	0.931356	1.00847	0.944098	1.00559	0.971488	0.988812	1.04255	1.00493	1.08003	1.02329	0.933042	1.0261	0.939176	1.02592	1.00406	1.01851	0.996751	0.986012	0.969032	0.981477	0.979392	1.00796	0.931417	1.00668	1.01265
1149	MEG3	MEG3	ASO_G0214548_AD_10	Targeted lncRNA	r10b0ADp1	0.902335	0.882064	1.02191	0.9681	0.988652	0.976054	0.993279	0.991278	0.996411	0.997277	1.00747	1.04475	0.996958	0.971515	0.994862	0.966969	1.01395	1.00426	1.00931	1.00655	1.02514	0.993556	1.02456	1.00328	1.00981	0.966009	0.995728	1.00853
1150	MELTF-AS1	MFI2-AS1	ASO_G0228109_01	Targeted lncRNA	r4b4p5	1.14956	0.94356	1.06462	1.03513	1.04401	1.00732	1.01563	1.00103	0.963237	0.96856	0.980418	0.948184	1.0578	1.00959	1.05713	1.01278	1.02998	1.01308	1.03574	0.993752	0.994407	1.02875	0.993463	1.02772	1.02728	1.04445	1.00502	0.981423
1151	MELTF-AS1	MFI2-AS1	ASO_G0228109_02	Targeted lncRNA	r4b4p5	1.06947	0.937062	0.963673	1.05278	1.04484	1.0552	1.00427	1.014	1.00302	0.975734	1.01789	0.936732	1.01188	1.05032	1.01135	1.05323	0.990641	1.02672	0.986785	1.0034	0.948869	1.02049	0.955622	1.02202	0.975092	1.04655	1.01263	0.982117
1152	MELTF-AS1	MFI2-AS1	ASO_G0228109_06	Targeted lncRNA	r4b4p5	0.928683	0.919176	0.933872	0.963644	0.984364	1.0725	1.00094	1.01555	1.01886	0.979569	1.09827	0.985389	0.972929	1.03572	0.965665	1.0291	0.996919	0.980744	1.01552	0.98639	0.949222	0.956598	0.954228	0.951153	0.931959	0.9873	1.03467	1.00546
1153	MELTF-AS1	MFI2-AS1	ASO_G0228109_07	Targeted lncRNA	r4b4p5	0.931056	0.888787	0.965549	0.966924	0.947892	0.964793	0.99038	1.00351	1.05898	1.05349	1.05775	1.09451	0.943196	0.976306	0.943122	0.966504	0.995562	0.999099	0.988461	1.01605	0.973803	0.974433	0.979029	0.982402	0.955102	0.961998	1.01321	1.0307
1154	MELTF-AS1	MFI2-AS1	ASO_G0228109_09	Targeted lncRNA	r4b4p5	1.02545	1.01234	0.982784	0.928534	1.00369	1.01171	1.00546	0.994179	0.997042	1.03088	1.03324	1.09603	0.992364	0.971351	0.987718	0.966199	1.01521	0.974578	1.01608	0.985818	0.972594	0.94273	0.967821	0.955237	0.96276	0.942365	1.01716	1.02203
1155	MIPEPP3	MIPEPP3	ASO_G0233325_01	Targeted lncRNA	r6b5p6	0.662369	0.695913	0.872049	0.84765	0.870048	0.831318	0.970953	0.959685	1.11393	1.11729	1.1646	1.1725	0.86571	0.820749	0.864951	0.820464	1.00585	1.0062	1.00632	1.01225	0.984608	0.990043	0.992668	1.00102	0.878433	0.849211	1.02342	1.02356
1156	MIPEPP3	MIPEPP3	ASO_G0233325_02	Targeted lncRNA	r6b5p6	0.59031	0.638907	0.778139	0.856859	0.929992	0.960718	0.978559	0.975551	1.08954	1.10589	1.17227	1.1893	0.85976	0.913039	0.840012	0.884627	0.91912	0.941122	0.951936	0.978453	0.898703	0.958384	0.905989	0.96407	0.827595	0.883306	1.03297	1.02571
1157	MIPEPP3	MIPEPP3	ASO_G0233325_05	Targeted lncRNA	r6b5p6	0.759954	0.745499	0.915466	0.912052	0.900854	0.942115	0.977443	0.976064	1.07426	1.07338	1.13762	1.13796	0.895429	0.923608	0.885872	0.914139	0.984462	0.986699	0.998306	0.993126	0.994616	1.00205	1.00494	1.01099	0.908658	0.919169	1.01241	1.01726
1158	MIPEPP3	MIPEPP3	ASO_G0233325_07	Targeted lncRNA	r6b5p6	0.840256	0.808652	0.965752	0.915962	0.936499	0.96828	0.986297	0.996112	1.04679	1.03221	1.08361	1.09651	0.949204	0.951492	0.942747	0.944425	1.01795	0.979047	1.02528	1.00313	1.02173	0.943607	1.03222	0.953453	0.954057	0.919602	1.02601	1.03535
1159	MIPEPP3	MIPEPP3	ASO_G0233325_08	Targeted lncRNA	r6b5p6	0.576947	0.606393	0.91927	0.978518	0.968464	0.994106	0.988814	0.992537	1.03899	1.02836	1.12813	1.06373	0.941577	0.981251	0.930168	0.976044	0.976236	0.997331	0.990942	1.00631	0.966591	1.01507	0.964233	1.0131	0.907926	0.966261	1.02486	1.00654
1160	MKLN1-AS	MKLN1-AS2	ASO_G0236753_01	Targeted lncRNA	r7b6p1	0.959391	0.96813	1.0093	0.918481	0.957487	0.944827	0.994651	0.992	1.01398	1.0355	1.01639	1.06494	0.982688	0.93406	0.984932	0.934065	1.02552	0.987296	1.01254	0.994747	1.02685	0.968424	1.01968	0.975109	1.00238	0.93021	1.00126	1.01388
1161	MKLN1-AS	MKLN1-AS2	ASO_G0236753_02	Targeted lncRNA	r7b6p1	1.00002	0.888379	0.978669	0.947199	0.957188	0.998322	0.999531	1.00054	1.00492	0.996962	1.01804	1.05123	0.966533	0.980518	0.97265	0.979207	1.00888	0.988833	1.00172	1.00233	0.995185	0.95516	1.00168	0.955719	0.976896	0.952891	1.0078	1.0205
1162	MKLN1-AS	MKLN1-AS2	ASO_G0236753_03	Targeted lncRNA	r7b6p1	0.904951	0.793544	0.982679	0.991067	0.993219	0.96067	1.00245	0.996729	0.977107	1.02432	0.995264	1.06762	0.983946	0.972563	0.990774	0.975964	0.99626	1.0234	0.995199	1.02653	0.991339	1.01242	0.991027	1.02244	0.97746	0.976164	1.00098	1.01648
1163	MKLN1-AS	MKLN1-AS2	ASO_G0236753_05	Targeted lncRNA	r7b6p1	0.947739	0.795534	1.01336	0.923823	0.986604	0.929209	1.00602	0.992176	0.988128	1.00583	0.969178	1.03123	0.995742	0.917527	1.0004	0.91926	1.00884	0.984339	0.995433	0.976748	1.01523	0.992644	1.00869	0.998836	1.01107	0.943693	0.987792	0.999922
1164	MKLN1-AS	MKLN1-AS2	ASO_G0236753_06	Targeted lncRNA	r7b6p1	0.991544	0.871122	0.969256	0.950379	0.985038	0.988932	1.00849	1.00899	0.983478	1.01022	1.02292	1.03327	0.984626	0.968579	0.983029	0.970714	1.01106	0.985604	1.00748	0.999376	0.984473	0.957234	0.978178	0.961294	0.968868	0.95081	1.00608	1.01642
1165	MKLN1-AS	MKLN1-AS2	ASO_G0236753_AD_01	Targeted lncRNA	r13b3ADp4	0.932209	0.923438	1.04162	1.01207	1.02262	0.984348	1.00936	0.988884	0.97162	0.992952	0.960782	0.998043	1.0295	0.987819	1.02257	0.986351	0.998591	1.00559	0.994654	0.998603	1.02183	1.04864	1.00279	1.04581	1.029	1.01351	0.978255	0.98334
1166	MKLN1-AS	MKLN1-AS2	ASO_G0236753_AD_02	Targeted lncRNA	r13b3ADp4	0.961023	0.938292	0.977086	0.942014	0.967906	1.01025	0.980663	1.00307	1.0248	0.98922	1.00979	1.01328	0.96581	0.978487	0.968962	0.968464	0.992497	0.97798	0.986631	0.984059	1.00111	0.977991	1.01581	0.977281	0.996791	0.966347	1.00194	1.0014
1167	MKLN1-AS	MKLN1-AS2	ASO_G0236753_AD_05	Targeted lncRNA	r13b3ADp4	0.999569	0.883621	0.948129	0.939667	0.966425	1.00173	0.989382	0.991594	1.01331	1.02997	1.06332	1.03652	0.949982	0.959465	0.950202	0.942885	0.983375	0.971563	0.997477	0.984342	0.982934	0.988446	0.986811	0.992435	0.945803	0.95208	1.01152	0.998969
1168	MKLN1-AS	MKLN1-AS2	ASO_G0236753_AD_07	Targeted lncRNA	r13b3ADp4	1.02421	0.941713	1.04463	1.0588	0.993714	0.989267	0.992511	0.985392	0.992529	1.00115	1.00474	0.99496	1.0033	1.01836	0.991452	1.01505	1.01455	1.01616	1.01519	1.0086	1.0457	1.06909	1.0353	1.06477	1.01846	1.04932	0.992097	0.983331
1169	MKLN1-AS	MKLN1-AS2	ASO_G0236753_AD_08	Targeted lncRNA	r13b3ADp4	0.987614	0.981936	0.96475	1.00466	1.02249	1.04252	0.995022	1.00728	1.00862	0.979087	1.00575	0.991844	0.990351	1.03072	0.980723	1.02533	0.971082	0.989356	0.973672	0.997928	0.990265	0.98886	0.984728	0.982628	0.992045	1.00961	0.993398	1.00268
1170	MRPS31P5	MRPS31P5	ASO_G0243406_02	Targeted lncRNA	r15bALLp3	0.804702	0.895169	0.952557	0.898794	0.962585	0.946505	0.994452	0.975816	1.00296	1.03729	1.01281	1.04371	0.950933	0.908467	0.950452	0.90896	0.984125	0.972489	0.991679	0.978506	0.994016	0.98713	0.997214	0.989438	0.97026	0.937733	1.00159	0.999886
1171	MRPS31P5	MRPS31P5	ASO_G0243406_05	Targeted lncRNA	r15bALLp3	0.874903	0.973138	1.02026	1.072	1.03513	1.00587	1.00804	1.01276	0.957617	0.993948	0.990268	1.01651	1.0328	1.04907	1.02585	1.04718	0.978789	1.02604	0.984112	1.03751	0.993599	1.00225	0.992173	1.00665	1.03177	1.02786	0.999893	1.01834
1172	MRPS31P5	MRPS31P5	ASO_G0243406_07	Targeted lncRNA	r15bALLp3	1.02312	0.983486	1.00316	0.968865	1.0256	0.992359	1.00178	0.995744	1.00938	0.999739	0.987336	1.00228	1.02515	0.979904	1.02198	0.980504	0.991387	0.994718	0.993541	0.992972	0.996886	0.987106	0.988501	0.992006	1.01252	0.979431	0.997352	0.998344
1173	MRPS31P5	MRPS31P5	ASO_G0243406_08	Targeted lncRNA	r15bALLp3	0.987758	0.949327	0.879439	0.945736	1.01424	0.967685	0.974809	0.990383	0.9497	1.02217	0.876527	1.0028	0.909361	0.941083	0.9027	0.940238	0.890279	0.982677	0.88488	0.982226	1.0418	1.02557	1.032	1.01778	1.00191	0.973522	0.921029	0.976625
1174	MRPS31P5	MRPS31P5	ASO_G0243406_10	Targeted lncRNA	r15bALLp3	0.875489	0.991374	0.961048	0.914048	0.967353	1.02574	0.988713	0.997738	1.00987	0.978729	1.00464	0.96592	0.95927	0.958285	0.958296	0.953687	0.994737	0.957925	0.996623	0.946472	1.02663	0.987581	1.02286	0.973352	0.987062	0.975109	0.992793	0.963487
1175	NBR2	NBR2	ASO_G0198496_01	Targeted lncRNA	r5b3p4	0.948006	0.910658	1.04549	1.03006	0.982784	0.957374	0.993787	0.99028	0.99937	1.04358	1.01808	1.08495	1.0038	0.991588	1.00492	0.991934	1.00217	1.03159	0.99157	1.03409	1.03733	1.01433	1.04877	1.01143	1.04373	0.993405	0.994131	1.02223
1176	NBR2	NBR2	ASO_G0198496_03	Targeted lncRNA	r5b3p4	0.941224	0.974177	0.979944	0.893813	0.970458	0.95833	0.996892	0.986618	1.03645	1.06199	1.0559	1.05857	0.977569	0.924783	0.972928	0.92643	1.00461	0.96851	1.01212	0.981427	0.987936	0.962291	0.997671	0.973811	0.971723	0.927978	1.01998	1.01587
1177	NBR2	NBR2	ASO_G0198496_04	Targeted lncRNA	r5b3p4	0.823543	0.823764	0.955442	0.892847	0.880239	0.952527	0.967598	0.980677	1.07489	1.04818	1.10268	1.08399	0.899205	0.918005	0.899533	0.915512	1.02551	0.970682	1.01554	0.986849	1.05596	0.977132	1.06359	0.98299	0.947997	0.916245	1.00933	1.01361
1178	NBR2	NBR2	ASO_G0198496_05	Targeted lncRNA	r5b3p4	0.886511	1.0055	0.955923	1.00034	0.940968	1.00398	0.997051	0.998557	1.02985	1.01959	1.07804	1.06064	0.954146	1.00919	0.957338	1.00173	1.01249	1.0183	1.02347	1.03378	0.976797	0.991049	0.987053	0.990251	0.941482	0.978533	1.0338	1.02456
1179	NBR2	NBR2	ASO_G0198496_09	Targeted lncRNA	r5b3p4	0.990165	1.03273	0.963018	0.958122	0.94167	0.939989	0.992747	0.988973	1.03748	1.01138	1.06591	1.04966	0.957573	0.948817	0.953266	0.952504	1.01651	1.01189	1.00989	1.00765	1.00927	1.02504	1.01258	1.03168	0.960211	0.972267	1.00595	1.00569
1180	NC_A	NC_A	ASO_NC_A	Negative Control	r9b8p6	1.04626	0.971731	0.863614	1.05852	0.963619	0.98561	0.986779	0.997139	1.00522	0.993359	1.00846	1.00622	0.910509	1.01165	0.914838	1.01484	0.953751	1.02781	0.959915	1.02874	0.965989	1.03035	0.971078	1.03018	0.924617	1.01768	0.989398	1.00535
1181	NC_A	NC_A	ASO_NC_A	Negative Control	r9b8p6	0.997204	0.982649	0.963259	1.01434	1.0421	1.00198	1.01045	1.00189	0.994713	0.981148	0.99823	0.999314	1.01905	1.00835	1.01007	1.00875	0.971653	1.01251	0.981045	1.00388	0.961372	1.00785	0.962738	1.00381	0.991751	1.00642	1.00368	0.999131
1182	NC_A	NC_A	ASO_NC_A	Negative Control	r9b8p6	1.01808	0.984074	0.977594	1.12267	0.987078	1.01961	1.00315	1.00059	1.01906	1.0065	1.02626	0.961504	0.983321	1.06712	0.98349	1.06801	1.00582	1.02845	1.00275	1.02366	0.984633	1.04981	0.983839	1.04835	0.973326	1.08621	1.00669	0.995751
1183	NC_A	NC_A	ASO_NC_A	Negative Control	r9b8p5	1.02699	1.05036	1.00951	1.01525	0.983953	0.96557	0.991881	0.99457	1.00535	1.00589	0.973062	1.02819	0.994585	0.987885	0.997832	0.994027	0.998841	1.027	0.996528	1.02354	1.0254	1.02664	1.02046	1.02578	1.01544	0.992053	0.980423	1.00418
1184	NC_A	NC_A	ASO_NC_A	Negative Control	r9b8p5	1.03788	0.961273	0.980384	0.940523	1.05977	0.982174	1.01061	0.990918	0.994335	1.01853	0.993371	1.03296	1.03504	0.957637	1.02884	0.953798	0.990765	0.971808	0.988387	0.980374	0.968425	0.986172	0.970513	0.988293	1.00636	0.955824	1.0079	1.0033
1185	NC_A	NC_A	ASO_NC_A	Negative Control	r9b8p5	0.941505	0.981991	0.94581	1.10852	1.02728	0.981254	1.01036	1.00165	0.982055	0.993845	0.969082	1.00333	0.992385	1.03247	0.985535	1.03997	0.95999	1.0516	0.966481	1.04469	0.948988	1.04437	0.951759	1.0432	0.978845	1.05147	0.998856	1.00534
1186	NC_A	NC_A	ASO_NC_A	Negative Control	r9b8p4	1.03553	0.999036	0.939925	1.05154	1.00493	0.946393	0.998566	0.993178	0.990006	1.03147	0.975384	1.04408	0.96646	0.991031	0.976437	0.994008	0.977879	1.04458	0.972907	1.03902	0.97897	1.04056	0.9769	1.04231	0.975294	1.00854	0.990859	1.00993
1187	NC_A	NC_A	ASO_NC_A	Negative Control	r9b8p4	0.991133	0.950215	1.00058	1.01756	1.04945	1.0194	1.0031	1.00241	0.983663	0.994097	0.989749	0.992374	1.03331	1.01776	1.02335	1.01283	0.985053	1.00249	0.990789	0.996324	0.977787	1.01532	0.984515	1.01255	1.00815	1.02095	1.00778	0.985345
1188	NC_A	NC_A	ASO_NC_A	Negative Control	r9b8p4	1.0026	1.02149	0.996669	0.993731	0.976038	1.00379	1.00072	1.00202	0.989961	1.01081	1.01057	0.987852	0.984827	1.00661	0.988112	1.00527	1.00043	0.989576	1.00681	0.994146	1.00246	0.984896	1.00099	0.982731	0.986751	1.00032	1.00457	1.00152
1189	NC_A	NC_A	ASO_NC_A	Negative Control	r9b8p3	1.02704	1.02639	1.01579	0.979277	1.00341	1.03888	0.998684	1.00672	0.987877	0.976918	0.97098	0.99456	1.00118	1.00875	1.00461	1.01288	1.01916	0.975691	1.00482	0.977382	1.04182	0.973366	1.03413	0.980035	1.01235	1.00315	0.97487	1.00679
1190	NC_A	NC_A	ASO_NC_A	Negative Control	r9b8p3	0.976579	0.955184	0.93094	1.02356	0.991567	0.959699	1.00227	0.990229	1.00619	0.99758	1.02149	1.01227	0.970889	0.980287	0.964736	0.981975	0.965024	1.0198	0.978302	1.01647	0.959382	1.03774	0.963682	1.03098	0.959683	0.997757	1.00558	0.998578
1191	NC_A	NC_A	ASO_NC_A	Negative Control	r9b8p3	0.98738	1.02742	1.00362	1.04681	1.02602	0.980412	1.00421	0.997879	1.01946	1.01197	0.998729	1.00197	1.02535	1.01355	1.02029	1.01551	0.991925	1.02841	0.997198	1.02583	0.973123	1.01457	0.976984	1.01418	1.01038	1.01668	1.0081	1.00608
1192	NC_A	NC_A	ASO_NC_A	Negative Control	r9b8p2	0.997297	0.988115	0.929061	1.03712	0.986961	0.983211	0.995509	0.996059	0.989319	1.00379	1.00868	1.00157	0.954655	1.00827	0.955562	1.0127	0.973198	1.02304	0.966216	1.01892	0.975059	1.03257	0.97047	1.03521	0.953899	1.02017	0.986639	1.00383
1193	NC_A	NC_A	ASO_NC_A	Negative Control	r9b8p2	1.00065	0.978586	1.03832	0.956492	1.0049	0.975148	0.993899	0.994015	1.01058	1.00375	1.00843	1.02168	1.02477	0.962168	1.02242	0.963229	1.02185	0.994889	1.01553	0.998069	1.02982	0.984373	1.03248	0.984566	1.0279	0.966854	0.997921	1.009
1194	NC_A	NC_A	ASO_NC_A	Negative Control	r9b8p2	1.00445	1.03091	0.938606	1.10041	1.01691	1.03287	1.00899	1.01152	1.0047	0.987859	0.995685	0.963952	0.979303	1.07083	0.973751	1.07234	0.962665	1.02435	0.973415	1.02786	0.952274	1.0259	0.953723	1.02355	0.960603	1.07057	1.00039	1.00221
1195	NC_A	NC_A	ASO_NC_A	Negative Control	r9b8p1	1.07113	1.00003	1.02765	0.9424	0.977506	1.0281	0.99934	1.00404	1.01507	0.991844	0.988369	1.01358	0.998895	0.994981	1.00384	0.988775	1.03635	0.96868	1.02556	0.98121	1.024	0.967201	1.02636	0.963765	1.01241	0.96928	0.999322	1.00179
1196	NC_A	NC_A	ASO_NC_A	Negative Control	r9b8p1	0.961933	0.970743	1.0383	0.958471	0.976369	0.985574	0.991697	0.9943	1.00336	1.00668	1.00808	1.02686	1.00754	0.969571	1.01218	0.964669	1.01932	0.985238	1.01129	0.99535	1.03526	0.992141	1.03682	0.991559	1.02452	0.960574	0.99883	1.00617
1197	NC_A	NC_A	ASO_NC_A	Negative Control	r9b8p1	1.00658	0.989582	0.996191	1.03699	1.00977	1.02268	1.00864	1.00199	0.979799	1.00325	0.982841	0.980271	1.00499	1.02402	1.00285	1.0277	0.982538	1.00787	0.985953	1.00064	0.984953	0.996452	0.979394	1.00209	1.00349	1.02973	0.995034	0.998856
1198	NC_A	NC_A	ASO_NC_A	Negative Control	r8b7p6	1.03368	1.01559	0.957703	1.02669	0.977098	1.01704	0.996064	0.990102	0.970674	1.00822	0.96815	0.995266	0.967013	1.01541	0.971485	1.01599	0.983851	1.01471	0.977211	1.00968	1.00086	1.04065	0.995711	1.03823	0.984378	1.02649	0.983179	0.987166
1199	NC_A	NC_A	ASO_NC_A	Negative Control	r8b7p6	0.998008	0.968408	0.959721	1.00035	0.990585	0.99948	0.999051	0.999015	1.03299	1.00511	1.04586	1.01093	0.984895	1.00167	0.97881	1.00358	0.992355	1.00609	1.0019	1.00963	0.98434	0.989481	0.980995	0.998055	0.964949	0.994999	1.0065	1.00991
1200	NC_A	NC_A	ASO_NC_A	Negative Control	r8b7p6	0.974023	1.01029	1.0353	1.02024	1.00144	1.01435	1.00982	1.00595	0.983603	0.99941	1.00057	0.979232	1.01207	1.01894	1.01203	1.0181	1.01409	0.988897	1.01045	0.991123	0.986521	0.998143	0.987454	0.999555	1.00615	1.02303	1.01261	1.00063
1201	NC_A	NC_A	ASO_NC_A	Negative Control	r8b7p5	1.03255	1.01337	0.937048	0.998686	1.01204	1.00854	1.00315	0.99819	0.984323	0.976069	0.981207	0.999664	0.977274	0.998529	0.978457	1.00189	0.970047	1.0101	0.967311	1.00554	0.99123	1.01554	0.983792	1.01828	0.981373	0.998643	0.983076	0.997478
1202	NC_A	NC_A	ASO_NC_A	Negative Control	r8b7p5	0.969616	0.925232	1.01909	1.03934	0.953529	0.994552	0.988459	1.00449	1.05157	1.03787	1.04795	1.01363	0.979069	1.01318	0.982439	1.00792	1.01749	1.00466	1.02309	1.01406	1.01252	0.989168	1.02079	0.992471	0.98849	1.00879	1.01413	1.01462
1203	NC_A	NC_A	ASO_NC_A	Negative Control	r8b7p5	1.0543	1.00492	0.986058	1.01978	1.03693	0.994408	1.00291	1.0028	0.972425	0.977748	1.00467	0.952879	1.02215	1.00979	1.01895	1.01034	0.992264	1.00544	0.990189	0.999816	0.976389	1.01515	0.977428	1.00724	0.999349	1.02336	1.00432	0.986376
1204	NC_A	NC_A	ASO_NC_A	Negative Control	r8b7p4	1.01979	0.961435	0.98609	1.00418	1.01175	0.967563	1.00754	0.995526	0.998792	0.989074	0.984343	1.02882	1.00108	0.988545	0.998565	0.991093	0.987361	1.01658	0.986959	1.0165	0.979411	1.00852	0.973158	1.01158	0.996509	0.98592	0.995946	1.00739
1205	NC_A	NC_A	ASO_NC_A	Negative Control	r8b7p4	0.965444	1.00313	0.998765	0.958013	0.968623	1.04764	0.991407	1.00531	1.00458	1.00876	1.02837	1.00761	0.975971	1.01083	0.977133	1.0049	1.01379	0.972988	1.01531	0.98924	1.01809	0.95498	1.02584	0.956991	0.98004	0.981621	1.00348	1.01029
1206	NC_A	NC_A	ASO_NC_A	Negative Control	r8b7p4	1.06025	0.989953	1.08304	0.969913	1.04185	0.962571	1.00324	0.996981	0.995003	1.00379	0.957529	0.993324	1.0626	0.960972	1.06586	0.962444	1.01187	0.997416	1.00007	0.99192	1.03456	1.00444	1.03497	0.997457	1.07913	0.976777	0.987503	0.995394
1207	NC_A	NC_A	ASO_NC_A	Negative Control	r8b7p3	0.99267	1.04046	0.907547	1.00573	0.976683	0.987155	0.994879	0.989355	0.995233	0.992217	0.999993	0.997718	0.938721	0.992792	0.934835	0.995323	0.976733	1.01299	0.969	1.00238	0.981195	1.05955	0.971926	1.05315	0.941013	1.018	0.98071	0.977285
1208	NC_A	NC_A	ASO_NC_A	Negative Control	r8b7p3	1.02615	0.987122	1.0357	1.00031	0.985613	0.977997	0.997081	0.996596	1.00155	1.01017	1.0315	1.01245	1.01047	0.986254	1.00958	0.99255	1.02617	0.993933	1.03211	0.996968	1.00711	0.993872	1.01421	0.999294	0.998159	1.00042	1.01463	1.01128
1209	NC_A	NC_A	ASO_NC_A	Negative Control	r8b7p3	0.94255	1.01105	1.00721	1.04351	1.00571	1.06685	1.00544	1.01664	1.00879	0.992038	1.01355	0.944796	1.0051	1.06666	1.00242	1.06529	0.996882	0.993283	1.00129	0.998257	0.975147	0.983123	0.977655	0.983762	0.992721	1.04969	1.01549	1.00061
1210	NC_A	NC_A	ASO_NC_A	Negative Control	r8b7p2	0.976657	0.981389	0.954273	0.959192	1.02171	0.996264	0.993658	1.00236	0.951446	0.996665	0.94795	1.03098	0.983336	0.985246	0.990352	0.981097	0.969454	0.991434	0.96105	0.987282	1.00421	0.988284	0.99954	0.985583	1.00191	0.984597	0.972157	0.99736
1211	NC_A	NC_A	ASO_NC_A	Negative Control	r8b7p2	1.03082	0.989438	0.998788	0.962569	0.96195	1.03813	0.987653	1.01333	1.03128	1.0072	1.03382	0.981703	0.977633	1.00889	0.97918	1.00503	1.01056	0.979323	1.01228	0.984844	1.0214	0.958747	1.03079	0.958659	0.989899	0.981474	1.01042	1.00481
1212	NC_A	NC_A	ASO_NC_A	Negative Control	r8b7p2	1.02718	0.994517	0.951954	1.17322	0.959877	1.02207	0.995042	1.00796	1.02272	0.990687	1.03412	0.971423	0.95597	1.08893	0.954175	1.09016	0.995833	1.0534	1.00449	1.05006	0.995494	1.03186	0.99783	1.02759	0.963016	1.0791	1.00624	1.00901
1213	NC_A	NC_A	ASO_NC_A	Negative Control	r8b7p1	0.993625	1.04903	0.932323	0.957416	0.988752	0.972952	0.996254	0.999358	0.973751	1.00324	0.979375	0.999602	0.963325	0.968749	0.963547	0.970946	0.976848	0.99405	0.97875	0.993672	1.0109	1.0011	1.00007	1.00258	0.968203	0.977326	0.977058	0.994089
1214	NC_A	NC_A	ASO_NC_A	Negative Control	r8b7p1	0.980476	0.984438	0.915581	0.986293	1.01698	0.987301	1.0015	0.994938	1.01641	1.028	1.05087	1.02418	0.973422	0.987705	0.965506	0.980672	0.965573	0.997223	0.985671	0.988678	0.931223	0.998007	0.938812	1.00144	0.934019	0.995985	1.02283	1.00207
1215	NC_A	NC_A	ASO_NC_A	Negative Control	r8b7p1	0.989199	1.00324	1.10069	1.1077	1.05325	0.980761	1.01097	0.996978	1.00247	0.976132	0.987504	0.958472	1.07135	1.03545	1.07658	1.04275	1.02945	1.03685	1.02395	1.02928	0.993891	1.06488	0.997339	1.05975	1.04834	1.07613	1.0163	0.98766
1216	NC_A	NC_A	ASO_NC_A	Negative Control	r7b6p6	1.00725	0.970006	0.909416	1.02588	0.985645	0.969979	0.991607	1.00317	0.99415	1.00069	1.00301	1.00658	0.94307	0.99787	0.942189	0.99719	0.970223	1.01909	0.97124	1.02195	0.975091	1.02491	0.966355	1.02436	0.939599	1.00875	0.986304	1.0067
1217	NC_A	NC_A	ASO_NC_A	Negative Control	r7b6p6	0.94409	0.970952	1.00482	1.00441	0.979402	0.991698	1.00133	0.999483	0.984773	1.05124	1.01096	1.00756	0.996097	1.0008	1.00165	1.00147	1.00392	1.01221	1.00412	1.0069	1.01021	0.998762	1.01425	1.00625	1.00582	0.999139	0.99386	1.00284
1218	NC_A	NC_A	ASO_NC_A	Negative Control	r7b6p6	0.991805	1.11589	0.958044	1.09742	0.995675	1.0776	0.996087	1.00832	1.0133	0.955857	1.01101	0.960881	0.972536	1.08963	0.96858	1.08892	0.970812	1.02375	0.974814	1.02097	0.987934	1.0031	0.989637	0.999141	0.978821	1.06787	1.00126	1.00904
1219	NC_A	NC_A	ASO_NC_A	Negative Control	r7b6p5	1.10063	0.980354	1.00027	1.03355	0.986233	0.979904	0.989467	0.994987	1.00364	0.992069	0.965875	1.00328	0.991432	1.00027	0.995106	1.00843	0.996074	1.01705	0.988615	1.01259	1.04258	1.01483	1.03755	1.01463	1.01835	1.01629	0.974318	1.00662
1220	NC_A	NC_A	ASO_NC_A	Negative Control	r7b6p5	0.927409	0.967464	0.926231	0.940531	0.958637	0.983388	0.998368	0.999847	1.00974	0.992131	1.05655	1.02365	0.949677	0.960799	0.956154	0.95596	0.995797	0.985233	1.00211	0.981986	0.961569	0.989456	0.96344	0.988695	0.937313	0.966265	1.02489	0.995233
1221	NC_A	NC_A	ASO_NC_A	Negative Control	r7b6p5	1.01835	1.00579	1.03983	1.05959	1.04775	1.04409	1.00894	1.00839	0.994966	1.00745	0.968109	0.98253	1.04598	1.05184	1.03711	1.04724	0.996238	1.00961	0.993826	1.02087	1.00254	0.989033	1.00112	0.994567	1.03001	1.03177	0.984704	1.01424
1222	NC_A	NC_A	ASO_NC_A	Negative Control	r7b6p4	1.02196	1.01033	0.90826	0.995081	0.983367	1.04299	0.988487	1.00985	1.02301	0.977891	1.00565	0.96477	0.942968	1.0256	0.944754	1.02703	0.967499	0.980561	0.966794	0.990936	0.972274	0.983784	0.971257	0.988127	0.94897	1.01955	0.986027	1.00266
1223	NC_A	NC_A	ASO_NC_A	Negative Control	r7b6p4	0.970981	0.898706	0.979129	1.03624	0.996049	0.963198	0.993599	0.993976	1.01194	1.02928	1.03525	1.01517	0.992798	0.992963	0.981357	0.997677	0.996431	1.02604	1.00103	1.02297	0.987012	1.05312	0.98857	1.05037	0.975192	1.01591	1.00297	0.99579
1224	NC_A	NC_A	ASO_NC_A	Negative Control	r7b6p4	1.03458	1.06344	1.00754	1.07375	0.999777	1.01462	1.0062	1.00789	0.957149	1.00074	1.0121	0.967059	1.00304	1.04263	0.999593	1.0496	1.00489	1.02458	1.00734	1.01093	0.992502	1.0113	0.987174	1.0145	0.991337	1.04905	1.01379	0.998765
1225	NC_A	NC_A	ASO_NC_A	Negative Control	r7b6p3	1.06837	1.00631	1.02348	0.979265	1.00571	0.983834	0.997391	0.9981	0.986758	0.987849	0.992212	1.0011	1.01837	0.981235	1.01853	0.98382	1.01272	0.999241	1.00707	0.996612	1.01508	0.987467	1.01454	0.983588	1.0222	0.971744	0.99247	0.999591
1226	NC_A	NC_A	ASO_NC_A	Negative Control	r7b6p3	0.955912	0.929502	1.03794	0.979798	0.991328	1.00812	0.995888	1.00164	1.01526	1.00019	1.01913	1.00745	1.00983	0.989042	1.00438	0.987356	1.02377	0.975455	1.01375	0.988645	1.04582	0.98263	1.04212	0.983	1.01652	0.988342	0.996625	1.00375
1227	NC_A	NC_A	ASO_NC_A	Negative Control	r7b6p3	0.962143	1.07776	0.97472	1.0048	1.03435	0.976663	1.01168	0.99531	1.00784	1.00212	1.00583	0.97429	1.00937	0.992147	1.00395	1.00196	0.977201	1.01161	0.983025	1.01089	0.951995	1.017	0.955061	1.0217	0.987634	1.01357	1.01437	0.993193
1228	NC_A	NC_A	ASO_NC_A	Negative Control	r7b6p2	1.07656	0.956654	0.909785	1.01132	0.986905	1.02856	0.994381	1.00719	0.998059	0.980785	0.991249	0.976607	0.945346	1.02748	0.948715	1.03088	0.966328	0.997319	0.965269	0.99642	0.971193	0.995189	0.97316	1.00071	0.954173	1.02445	0.989333	0.997287
1229	NC_A	NC_A	ASO_NC_A	Negative Control	r7b6p2	0.979714	0.885328	0.999577	1.01586	0.99017	0.934058	0.993713	0.992884	1.00998	1.04577	1.0089	1.06884	0.998171	0.966794	0.991996	0.965364	1.0098	1.03218	1.00446	1.03468	1.02536	1.02626	1.01532	1.02684	1.00026	0.968247	0.989058	1.01537
1230	NC_A	NC_A	ASO_NC_A	Negative Control	r7b6p2	1.04385	1.05789	1.0441	1.01936	1.02272	1.0376	1.00183	1.01	1.0101	0.955303	1.00378	0.95063	1.02961	1.0326	1.02494	1.03811	1.00142	0.99295	1.01399	0.985179	1.00843	0.973566	1.00792	0.976053	1.02048	1.0324	1.00642	1.00253
1231	NC_A	NC_A	ASO_NC_A	Negative Control	r7b6p1	1.05762	0.980849	1.00358	1.01535	1.01524	0.962603	1.00642	1.00191	0.974102	1.04232	0.963325	1.02443	1.01222	0.988023	1.01355	0.994673	0.992794	1.02146	0.984878	1.01963	1.00806	1.0105	1.00539	1.01117	1.02323	0.993352	0.981481	1.01384
1232	NC_A	NC_A	ASO_NC_A	Negative Control	r7b6p1	0.919877	0.92064	0.965303	1.02249	0.982912	0.964686	0.991028	0.994094	1.00394	0.996182	1.03843	1.03178	0.970998	0.98607	0.96934	0.979183	0.995743	1.00669	1.00031	1.00782	0.992355	1.02106	0.995068	1.02125	0.972746	0.985971	1.01032	0.99651
1233	NC_A	NC_A	ASO_NC_A	Negative Control	r7b6p1	1.03907	1.08194	1.05376	0.939513	1.05922	1.01534	1.00556	1.00099	0.998847	0.984614	0.94521	0.996815	1.06031	0.982371	1.05829	0.984972	1.00546	0.977854	1.00238	0.984979	1.01503	0.953001	1.01117	0.955952	1.05713	0.967563	0.992453	1.00539
1234	NC_A	NC_A	ASO_NC_A	Negative Control	r6b5p6	0.995854	0.98676	0.895328	0.986834	1.04947	0.982997	1.00644	0.997491	0.953478	1.00783	0.973533	1.01716	0.97573	0.994293	0.972115	0.994548	0.936976	1.0038	0.937515	1.01017	0.943104	1.0029	0.931785	1.00236	0.956164	0.992146	0.9747	1.00494
1235	NC_A	NC_A	ASO_NC_A	Negative Control	r6b5p6	0.972895	0.998229	1.02064	1.00413	0.997096	1.01776	0.997617	1.00457	1.01529	0.966398	1.0127	0.97963	1.00182	1.01749	0.997337	1.01605	1.00231	0.988283	1.00292	0.987537	1.01041	1.00489	1.00872	1.0068	1.00176	1.02995	0.996528	1.00436
1236	NC_A	NC_A	ASO_NC_A	Negative Control	r6b5p6	1.03663	1.00963	1.0733	1.01976	1.01131	0.941357	1.00577	0.988104	0.995968	1.06104	0.988193	1.02878	1.04225	0.968409	1.04803	0.971923	1.04443	1.02421	1.03643	1.02543	1.01333	1.02537	1.01825	1.03209	1.02995	0.99004	1.00841	1.01106
1237	NC_A	NC_A	ASO_NC_A	Negative Control	r6b5p5	1.00141	1.02701	0.897605	0.986139	1.05046	1.0485	1.00186	1.00545	0.986923	0.941879	0.960082	0.940186	0.973042	1.02131	0.963031	1.02103	0.927528	0.988709	0.933513	0.978916	0.9512	1.0051	0.943461	0.996841	0.953424	1.01615	0.973515	0.971834
1238	NC_A	NC_A	ASO_NC_A	Negative Control	r6b5p5	0.925779	0.978813	0.963917	1.0239	0.992978	0.999193	0.998012	1.00356	1.0251	1.02004	1.00376	1.03642	0.987011	1.01239	0.987425	1.01615	0.984165	1.01278	0.980121	1.03325	0.987891	0.98779	0.986919	0.997174	0.983598	1.00281	0.993663	1.03011
1239	NC_A	NC_A	ASO_NC_A	Negative Control	r6b5p5	1.05499	1.012	0.985018	1.14342	0.926925	0.981949	0.990789	1.00033	1.03246	0.993601	1.06526	0.994301	0.952982	1.05326	0.957483	1.05488	1.02922	1.0576	1.03162	1.04258	1.00818	1.05985	1.01675	1.05886	0.966877	1.07713	1.02165	1.00923
1240	NC_A	NC_A	ASO_NC_A	Negative Control	r6b5p4	0.94573	1.07896	0.939863	0.991651	1.02315	0.982943	0.98619	1.00221	0.975342	1.0326	0.969321	1.05058	0.974498	0.987362	0.965461	0.984832	0.962562	0.996041	0.952007	1.00962	0.997824	0.970333	0.990493	0.975919	0.985348	0.967585	0.962019	1.01977
1241	NC_A	NC_A	ASO_NC_A	Negative Control	r6b5p4	1.00357	0.947636	0.991047	1.01849	1.02944	1.00424	1.00436	1.00557	0.998549	0.974808	1.00036	1.00353	1.01567	1.02239	1.00828	1.02297	0.982482	1.0055	0.98781	1.00533	0.983213	1.00085	0.985378	1.00448	0.998363	1.02071	1.00269	1.01177
1242	NC_A	NC_A	ASO_NC_A	Negative Control	r6b5p4	1.06369	0.960408	1.04628	1.01266	0.987327	0.972902	0.999588	1.00209	0.99826	1.02044	0.995259	0.980954	1.02022	0.979861	1.02455	0.993912	1.03792	1.01549	1.03607	1.00916	1.03754	1.01024	1.03417	1.00957	1.02195	1.00604	1.00639	0.99736
1243	NC_A	NC_A	ASO_NC_A	Negative Control	r6b5p3	0.96973	1.02178	0.96138	0.988399	0.996605	1.00864	1.0001	1.00339	1.01521	0.974096	1.01098	0.997876	0.974346	1.00474	0.973933	1.00753	0.986673	0.99482	0.988604	0.992006	0.988317	0.976707	0.973011	0.974822	0.968267	0.997273	0.989878	1.008
1244	NC_A	NC_A	ASO_NC_A	Negative Control	r6b5p3	0.987793	1.00713	1.02854	0.967576	1.02431	0.989505	0.997841	1.00843	0.993259	1.01078	0.979075	1.05429	1.02823	0.990612	1.02847	0.983931	1.00307	0.985912	1.00196	1.00844	1.04117	0.949532	1.03719	0.952862	1.03241	0.963471	0.982408	1.03584
1245	NC_A	NC_A	ASO_NC_A	Negative Control	r6b5p3	0.96466	1.0489	1.06327	0.990835	0.973388	1.00755	0.99406	0.996181	1.02285	0.983813	1.01323	0.944543	1.00608	0.995988	1.00703	0.999096	1.03823	0.9913	1.0298	0.979191	1.03391	1.01037	1.04459	1.01753	1.02118	1.0174	1.00658	0.977296
1246	NC_A	NC_A	ASO_NC_A	Negative Control	r6b5p2	0.953917	0.959955	0.929685	0.992312	0.973661	1.03046	0.99148	1.00716	1.01227	0.973571	1.0127	0.985446	0.952999	1.01137	0.949576	1.01059	0.973092	0.990476	0.975679	0.987862	0.982681	0.985293	0.980581	0.975706	0.956548	0.99537	0.994712	0.99597
1247	NC_A	NC_A	ASO_NC_A	Negative Control	r6b5p2	1.03633	1.0199	1.01452	1.00647	1.00199	1.0422	1.00095	1.00662	1.00062	0.996817	1.00348	1.01175	1.01036	1.02742	1.00734	1.02234	0.999223	1.00811	1.00312	1.00644	1.00364	0.990269	1.00465	0.982376	1.01564	0.994972	1.00116	0.999629
1248	NC_A	NC_A	ASO_NC_A	Negative Control	r6b5p2	1.02093	1.00897	1.06175	0.995257	0.973865	0.977825	1.00264	0.991149	1.01251	1.00421	0.989734	0.996888	1.01458	0.983263	1.02097	0.989171	1.02618	1.00293	1.02471	1.00219	1.03909	0.99903	1.04481	1.01188	1.04172	0.995756	1.00059	1.00794
1249	NC_A	NC_A	ASO_NC_A	Negative Control	r6b5p1	0.969269	1.0755	0.984739	1.00826	1.00664	0.98947	0.989828	1.00757	0.99266	0.995542	0.959372	1.02765	0.994439	0.99898	0.989091	1.00054	0.980852	1.00932	0.971784	1.0121	1.02216	0.977086	1.01202	0.984025	1.01511	0.987959	0.969388	1.01804
1250	NC_A	NC_A	ASO_NC_A	Negative Control	r6b5p1	1.03185	1.00538	1.05798	0.981017	1.0201	1.04714	1.0042	1.00666	0.991728	0.990859	1.01723	1.01639	1.05008	1.01878	1.05533	1.00874	1.03621	0.981612	1.03424	0.991054	1.00509	0.974154	1.00859	0.970917	1.01823	0.996354	1.01652	1.00947
1251	NC_A	NC_A	ASO_NC_A	Negative Control	r6b5p1	0.97548	0.942514	0.945137	1.02286	0.978177	0.958472	0.9971	0.994651	1.00006	1.02915	1.00136	0.978004	0.964807	0.972909	0.970461	0.975835	0.979531	1.01248	0.986035	1.0048	0.985799	1.03571	0.9869	1.03755	0.968009	1.01433	0.999172	0.987419
1252	NC_A	NC_A	ASO_NC_A	Negative Control	r5b3p6	0.992546	1.03587	0.872175	1.01627	0.974027	0.994607	0.990055	1.00207	0.996252	0.984986	0.998353	1.01894	0.925524	1.0135	0.927932	1.01077	0.970523	1.00901	0.966756	1.01402	0.983616	1.00023	0.97877	0.997512	0.925822	1.00808	0.979447	1.00971
1253	NC_A	NC_A	ASO_NC_A	Negative Control	r5b3p6	1.02847	1.00911	0.933688	0.988207	1.02345	0.967654	1.00238	0.989656	0.993615	1.02933	1.01443	1.02007	0.984975	0.969115	0.98298	0.966302	0.959368	1.00413	0.979045	1.00034	0.962277	1.0201	0.97018	1.02231	0.970428	0.985085	1.01115	1.00169
1254	NC_A	NC_A	ASO_NC_A	Negative Control	r5b3p6	0.944348	0.98965	1.03384	1.15583	1.00953	1.03073	1.00309	1.01275	1.01244	0.983376	0.98486	0.963351	1.02357	1.08331	1.01996	1.09205	0.998691	1.05828	0.998199	1.04164	1.00241	1.03137	0.998767	1.03246	1.02081	1.08978	0.993414	1.0046
1255	NC_A	NC_A	ASO_NC_A	Negative Control	r5b3p5	1.08887	0.992769	0.919095	0.965367	0.961181	0.97179	0.983696	0.987972	1.00957	1.00546	1.03844	1.00924	0.925272	0.963851	0.927349	0.97018	1.00153	0.99344	1.00595	0.995649	1.00523	1.00648	1.00672	1.0027	0.927995	0.971468	0.999582	0.997565
1256	NC_A	NC_A	ASO_NC_A	Negative Control	r5b3p5	0.969395	0.95588	0.973644	0.991519	1.00936	0.9899	1.01035	0.990732	0.987183	1.03293	1.01574	1.01273	1.00338	0.985157	0.999238	0.97582	0.990447	0.997075	0.998937	0.988735	0.964454	1.02064	0.966253	1.02347	0.979674	1.00216	1.0126	0.987928
1257	NC_A	NC_A	ASO_NC_A	Negative Control	r5b3p5	0.951477	1.04161	1.0223	1.12808	1.0094	1.05837	1.00909	1.01816	0.97692	0.987942	0.993397	0.930449	1.01953	1.10281	1.01966	1.10775	0.998682	1.01883	0.999376	1.01135	0.98099	1.02221	0.986118	1.01474	1.01174	1.10696	1.01195	0.990376
1258	NC_A	NC_A	ASO_NC_A	Negative Control	r5b3p4	1.11089	1.01449	0.929307	0.968237	1.0059	0.986584	0.996468	0.99557	0.99724	0.999482	0.980988	1.02204	0.964109	0.979351	0.96134	0.984969	0.956855	1.01001	0.959713	1.00059	0.985486	0.99062	0.978631	0.988928	0.972398	0.973456	0.978953	1.00594
1259	NC_A	NC_A	ASO_NC_A	Negative Control	r5b3p4	0.969085	0.928063	0.988594	1.00309	0.987667	0.989715	1.00622	0.992926	1.01386	1.00219	1.01929	1.02652	0.990254	0.997799	0.98792	0.996524	0.998848	1.00715	1.00056	1.01154	0.979161	1.00674	0.979996	1.01023	0.979614	0.995751	1.00745	1.01217
1260	NC_A	NC_A	ASO_NC_A	Negative Control	r5b3p4	0.977378	1.00009	1.12014	0.990633	1.01688	1.01325	1.00732	1.00149	1.00861	0.978616	0.980891	0.970271	1.07234	0.996151	1.07276	0.996485	1.04337	0.98376	1.04552	0.982086	1.04194	0.996047	1.04642	0.995795	1.06977	1.00901	1.00476	0.990734
1261	NC_A	NC_A	ASO_NC_A	Negative Control	r5b3p3	0.999483	0.948765	0.917111	1.01015	0.991119	1.00779	0.99843	1.00105	0.986832	1.002	1.00102	1.01508	0.958431	1.01062	0.959167	1.01154	0.961858	1.01332	0.967473	1.01371	0.971601	0.992965	0.970691	0.994341	0.958089	1.00249	0.993373	1.00625
1262	NC_A	NC_A	ASO_NC_A	Negative Control	r5b3p3	0.998509	0.988664	0.957869	0.970696	1.04352	0.959028	1.00632	0.996948	0.977667	0.994246	0.981709	1.02784	1.00987	0.958441	1.00611	0.960181	0.959907	0.992597	0.966002	1.00092	0.971874	0.996284	0.969929	0.997338	0.994984	0.967846	0.990653	1.00981
1263	NC_A	NC_A	ASO_NC_A	Negative Control	r5b3p3	1.01128	1.0533	1.03395	1.11023	1.0467	0.951846	1.01065	0.986605	1.00004	1.03921	0.977886	0.99647	1.05034	1.01231	1.04555	1.01745	1.00517	1.06714	1.00388	1.048	0.982261	1.08501	0.978984	1.08872	1.02778	1.04881	1.0024	0.997509
1264	NC_A	NC_A	ASO_NC_A	Negative Control	r5b3p2	1.00089	1.01945	0.978195	1.06917	0.916181	0.941705	0.987757	0.984948	1.03615	1.02139	1.00034	1.0457	0.934503	0.981628	0.939849	0.987419	1.02827	1.05034	1.00213	1.05034	1.04367	1.04928	1.03832	1.05501	0.980407	1.00504	0.981349	1.01416
1265	NC_A	NC_A	ASO_NC_A	Negative Control	r5b3p2	0.997499	0.954239	0.969187	0.916521	1.00636	1.0582	1.00056	1.00942	0.995947	1.00849	1.00042	1.01488	0.994891	1.00199	0.99112	0.996104	0.978679	0.946709	0.988661	0.964796	0.982803	0.923651	0.982985	0.93006	0.982239	0.963158	0.992639	1.01318
1266	NC_A	NC_A	ASO_NC_A	Negative Control	r5b3p2	1.03021	0.997709	0.998966	1.06796	1.06032	1.01723	1.01093	1.00638	0.974533	0.9635	0.9832	0.95547	1.04929	1.03771	1.04647	1.03904	0.970942	1.02506	0.978206	1.01587	0.962571	1.03802	0.957784	1.03584	1.02582	1.04333	1.00707	0.991593
1267	NC_A	NC_A	ASO_NC_A	Negative Control	r5b3p1	1.0011	1.00229	1.00725	0.960337	0.947591	0.970293	0.981483	0.991225	0.993799	1.0068	0.980187	1.02754	0.966057	0.956097	0.968833	0.950646	1.03051	0.988234	1.02168	0.983329	1.0591	0.995542	1.06179	0.997252	1.00075	0.967018	0.984702	0.997246
1268	NC_A	NC_A	ASO_NC_A	Negative Control	r5b3p1	0.935459	1.00157	0.922315	1.01767	1.03909	0.97624	1.00686	0.997208	0.995191	1.04649	1.01128	1.02643	0.985215	0.991406	0.98382	0.994041	0.951163	1.01915	0.963458	1.02193	0.926867	1.01255	0.935436	1.0164	0.959177	0.992871	1.01082	1.01239
1269	NC_A	NC_A	ASO_NC_A	Negative Control	r5b3p1	1.03795	1.02164	1.0412	1.05123	0.99232	1.07446	1.00328	1.01994	1.01076	0.946947	1.0112	0.943367	1.02637	1.07486	1.03134	1.07132	1.02508	0.985858	1.02215	0.987449	1.02054	0.985405	1.0153	0.97382	1.02337	1.05681	1.00552	0.989327
1270	NC_A	NC_A	ASO_NC_A	Negative Control	r4b4p6	0.991326	0.982282	0.948006	0.978223	1.00977	0.985827	1.00008	0.994092	1.001	1.00075	0.988164	1.00755	0.973275	0.98111	0.974145	0.98014	0.958173	0.995661	0.953136	0.986206	0.974055	1.01323	0.969471	1.00975	0.986598	0.990988	0.983338	0.989403
1271	NC_A	NC_A	ASO_NC_A	Negative Control	r4b4p6	0.978647	0.997369	1.00226	1.03966	1.01361	1.02711	1.00829	1.00193	0.98905	0.985767	0.976678	1.0015	1.00022	1.03634	0.998557	1.03639	0.993265	1.01574	0.995978	1.02049	1.00919	1.00135	1.00223	1.0049	0.998149	1.02671	0.994548	1.01123
1272	NC_A	NC_A	ASO_NC_A	Negative Control	r4b4p6	1.06131	0.989064	0.992308	1.03954	0.996861	0.966825	1.00203	0.993565	1.00219	1.02124	1.00749	1.01862	1.0032	1.00585	1.00408	1.00669	0.997645	1.03951	1.00977	1.03442	0.973477	1.02871	0.981323	1.03232	0.981634	1.01592	1.01047	1.01101
1273	NC_A	NC_A	ASO_NC_A	Negative Control	r4b4p5	1.03308	0.987534	0.948177	1.01311	1.03638	1.01006	1.00073	0.996618	0.969673	0.984437	0.968646	1.01265	0.987148	1.0142	0.984187	1.01206	0.963706	1.02285	0.966579	1.01418	0.987923	1.01703	0.982579	1.00692	0.974983	1.00764	0.975131	1.00104
1274	NC_A	NC_A	ASO_NC_A	Negative Control	r4b4p5	0.968967	1.01538	0.987524	1.01447	0.963985	0.97039	0.989456	1.00033	1.01123	1.03331	1.01314	1.03892	0.971039	0.999185	0.971287	1.00026	0.999376	1.0095	0.995421	1.01989	1.02102	0.976369	1.02863	0.993954	0.993573	0.985769	1.00317	1.02422
1275	NC_A	NC_A	ASO_NC_A	Negative Control	r4b4p5	0.928413	1.06662	1.0812	0.95552	1.00689	1.0123	1.0031	1.00977	1.00437	0.996973	1.00717	0.95947	1.03957	0.988856	1.04258	0.989622	1.0494	0.955173	1.03527	0.968668	1.03806	0.959599	1.03434	0.953581	1.04543	0.99261	1.00294	0.993498
1276	NC_A	NC_A	ASO_NC_A	Negative Control	r4b4p4	0.942197	0.980575	1.05265	0.924357	1.04958	0.965201	1.00776	0.992443	0.9999	0.987637	0.966136	1.01289	1.05105	0.937897	1.04905	0.943314	0.987698	0.983308	0.987035	0.979645	1.0105	0.978574	1.00027	0.979415	1.05473	0.948933	0.983193	1.00048
1277	NC_A	NC_A	ASO_NC_A	Negative Control	r4b4p4	0.994681	0.928417	1.02757	0.991867	0.992214	1.0112	0.999797	1.00424	1.01183	1.01506	1.01856	1.02956	1.01222	1.00064	1.00856	0.994029	1.02709	0.996003	1.02281	1.01108	1.03048	0.958204	1.03459	0.963835	1.012	0.967592	1.00252	1.02503
1278	NC_A	NC_A	ASO_NC_A	Negative Control	r4b4p4	1.07905	1.07509	0.96311	1.04045	0.958382	1.02341	0.988982	1.00677	1.02599	0.959576	1.02003	0.952823	0.959785	1.03841	0.963457	1.0416	1.00686	0.999043	1.00598	0.993442	1.00359	1.01865	1.00924	1.01265	0.965567	1.05118	1.00176	0.987021
1279	NC_A	NC_A	ASO_NC_A	Negative Control	r4b4p3	0.972585	1.00215	0.960566	0.972888	1.02821	0.993883	1.00833	0.99	0.978104	1.00446	0.978616	0.985829	0.998721	0.973045	0.992904	0.972578	0.962201	0.9933	0.96926	0.993947	0.966872	1.017	0.956057	1.02188	0.980574	0.992023	0.981959	0.9927
1280	NC_A	NC_A	ASO_NC_A	Negative Control	r4b4p3	0.969848	0.964687	1.00494	0.968046	1.02136	0.97752	1.01138	0.986683	1.00156	1.01942	1.00666	1.04758	1.0134	0.973052	1.01325	0.971657	0.991755	1.00067	0.993582	1.00694	0.96211	0.993207	0.964998	0.995802	0.992292	0.97373	1.01372	1.01378
1281	NC_A	NC_A	ASO_NC_A	Negative Control	r4b4p3	1.03516	1.05557	1.06513	1.02843	1.00089	0.978141	0.997759	1.00585	0.99465	1.0018	0.996082	0.985234	1.03385	1.00794	1.0361	1.01352	1.03386	1.01822	1.019	1.01727	1.04924	1.01157	1.05258	1.00868	1.05278	1.0086	0.997726	1.00012
1282	NC_A	NC_A	ASO_NC_A	Negative Control	r4b4p2	0.95468	0.93348	0.959223	1.00117	0.994531	1.00307	0.990392	1.00008	0.985868	1.01994	0.954531	1.0104	0.956781	1.00576	0.952472	1.00427	0.948006	0.992498	0.940538	0.994805	1.01152	0.985932	1.00381	0.991775	0.998478	1.0129	0.962514	1.01076
1283	NC_A	NC_A	ASO_NC_A	Negative Control	r4b4p2	1.02395	0.953793	0.968566	1.01882	1.01172	1.00025	0.997537	1.00447	0.998416	0.999941	1.00256	1.02972	0.990867	1.01199	0.990395	1.01022	0.977245	1.03041	0.992457	1.03214	0.977918	1.01806	0.976608	1.01107	0.977911	0.987895	1.00639	1.00324
1284	NC_A	NC_A	ASO_NC_A	Negative Control	r4b4p2	1.06615	1.06794	1.00017	1.05205	1.00113	0.9893	0.999114	1.00841	1.00821	0.987632	1.0223	0.980494	1.00866	1.02595	1.00855	1.0341	1.02574	1.0261	1.01303	1.02703	0.996582	1.00999	0.998784	1.01796	0.994252	1.02856	1.00306	1.01404
1285	NC_A	NC_A	ASO_NC_A	Negative Control	r4b4p1	0.965028	1.0743	0.980295	1.02787	1.03371	1.02097	1.00038	1.00663	0.981391	0.977283	0.98904	0.983827	1.00736	1.03192	1.0048	1.03386	0.965314	1.00809	0.964171	1.00781	0.986057	1.02104	0.975689	1.02127	0.993813	1.03404	0.985641	0.989053
1286	NC_A	NC_A	ASO_NC_A	Negative Control	r4b4p1	0.951885	0.934859	1.01577	0.969718	0.989387	0.970244	0.992698	0.996477	0.993265	1.03554	1.00996	1.0033	1.00108	0.966361	1.00128	0.964609	1.01641	1.00238	1.02216	1.00585	1.01364	0.98733	1.01706	0.996608	0.993578	0.972116	1.01073	1.00459
1287	NC_A	NC_A	ASO_NC_A	Negative Control	r4b4p1	1.03568	1.03824	0.983988	1.02236	1.00772	0.977968	1.00432	0.999497	0.985046	1.02747	1.00539	1.00848	0.989077	1.00421	0.986236	1.00921	0.999376	1.00843	0.994831	1.00518	0.988451	1.00348	0.99084	0.998539	0.982791	1.02366	1.00234	1.00765
1288	NC_A	NC_A	ASO_NC_A	Negative Control	r3b2p6	1.00641	1.01077	0.98449	0.937422	0.955004	0.986926	0.994134	1.00144	1.00593	0.997684	0.974218	1.03688	0.963075	0.969094	0.966328	0.965312	1.00989	0.989348	0.995197	0.992844	1.0188	0.969848	1.02018	0.965453	0.985517	0.946879	0.98119	1.00859
1289	NC_A	NC_A	ASO_NC_A	Negative Control	r3b2p6	1.02606	1.04367	0.962115	1.01039	1.00255	1.00119	0.993834	1.00112	1.03852	1.00365	1.07249	0.992538	0.980357	1.00536	0.984768	1.00284	0.987495	1.00102	1.00824	1.00334	0.959692	1.02083	0.966489	1.01981	0.962021	1.01886	1.02547	0.995485
1290	NC_A	NC_A	ASO_NC_A	Negative Control	r3b2p6	0.935142	0.977951	1.01759	1.08799	0.986665	1.06767	0.996392	1.01308	0.988671	0.965546	0.993667	0.930197	1.00227	1.07985	1.00402	1.07673	1.01434	0.997907	1.00566	0.994718	1.00912	1.02171	1.01824	1.00983	1.00202	1.0847	1.00282	0.986445
[truncated: 1,166 more rows]

## Sheet: Table S3B
	KD.pubID	KD.geneSymbol	perturb_id	Description	GrowthRate_mean	GrowthRate_pvalue	GrowthRate_tvalue	GrowthRate_fdr	Area_mean	Area_pvalue	Area_tvalue	Area_fdr	Compactness_mean	Compactness_pvalue	Compactness_tvalue	Compactness_fdr	Eccentricity_mean	Eccentricity_pvalue	Eccentricity_tvalue	Eccentricity_fdr	Extent_mean	Extent_pvalue	Extent_tvalue	Extent_fdr	FormFactor_mean	FormFactor_pvalue	FormFactor_tvalue	FormFactor_fdr	MajorAxisLength_mean	MajorAxisLength_pvalue	MajorAxisLength_tvalue	MajorAxisLength_fdr	MaxFeretDiameter_mean	MaxFeretDiameter_pvalue	MaxFeretDiameter_tvalue	MaxFeretDiameter_fdr	MaximumRadius_mean	MaximumRadius_pvalue	MaximumRadius_tvalue	MaximumRadius_fdr	MedianRadius_mean	MedianRadius_pvalue	MedianRadius_tvalue	MedianRadius_fdr	MinFeretDiameter_mean	MinFeretDiameter_pvalue	MinFeretDiameter_tvalue	MinFeretDiameter_fdr	MinorAxisLength_mean
[truncated: 2,096 more rows]
[truncated: 11 more columns]

[truncated: 1 more sheets: Table S3C]
