# Supplementary material for: Functional annotation of human long noncoding RNAs via molecular phenotyping
Source: Genome Res. 2020 Jul;30(7):1060–72. doi: 10.1101/gr.254219.119 (PMC7397864; doi:10.1101/gr.254219.119)
Supplement: Supplemental Material [file supp_gr.254219.119_Supplemental_Table_S4.xlsx]

## Sheet: Info
	Supplemental Table S4: CAGE data overview and summary for selected lncRNA targets and controls.
	Table S4A. Overview of CAGE sequencing experiment.			Table S4B. Overview of CAGE lncRNA targets.			Table S4C. CAGE sequencing statistics.
	ID	Description		ID	Description		ID	Description
1	Description	classification of knockdown targets: lncRNA, positive controls etc.	1	KD.pubID	HGNC symbol or KD.geneSymbol otherwise	1	library_name	CAGE library name
2	Lib_CAGE	number of CAGE libraries in a given category as above	2	KD.geneSymbol	gene symbol of the targeted lncRNA	2	CAGE_Mapped	number of mapped CAGE reads
			3	perturb_id	ASO id	3	sample_id	CAGE sequencing sample id
			4	ASO_CAGE	number of ASO/target as in CAGE	4	lsid	CAGE sequencing run
						5	perturb_id	ASO id
						6	KD.geneSymbol	gene symbol of the knockdown target
						7	KD.geneID	ENSMBL gene id of the knockdown target
						8	geneClass	gene class of the knockdown target
						9	Category	classification of knockdown targets: lncRNA, positive controls etc.

## Sheet: Table S4A
	Category	Lib_CAGE
1	Targeted lncRNA	696
2	Negative Control	143
3	Failed QC	96
4	Positive Control	56
5	Experimental Control	45
6	Mock Transfection	15
7	Native Fibroblasts	15

## Sheet: Table S4B
	KD.pubID	KD.geneSymbol	perturb_id	ASO_CAGE
1	A1BG-AS1	A1BG-AS1	ASO_G0268895_01	2
2	A1BG-AS1	A1BG-AS1	ASO_G0268895_03	2
3	AC004980.7	AC004980.7	ASO_G0205485_01	2
4	AC004980.7	AC004980.7	ASO_G0205485_03	2
5	SPRY4-AS1	AC005592.2	ASO_G0231185_03	2
6	SPRY4-AS1	AC005592.2	ASO_G0231185_02	2
7	MAP4K3-DT	AC007246.3	ASO_G0231312_04	2
8	MAP4K3-DT	AC007246.3	ASO_G0231312_02	2
9	MYOSLID	AC007879.7	ASO_G0229647_06	2
10	MYOSLID	AC007879.7	ASO_G0229647_AD_09	2
11	AC009005.2	AC009005.2	ASO_G0267751_AD_02	1
12	CHROMR	AC009948.5	ASO_G0223960_AD_10	2
13	CHROMR	AC009948.5	ASO_G0223960_08	2
14	ZNF232-AS1	AC012146.7	ASO_G0234327_01	2
15	ZNF232-AS1	AC012146.7	ASO_G0234327_07	2
16	LINC01578	AC013394.2	ASO_G0272888_AD_07	3
17	LINC01578	AC013394.2	ASO_G0272888_AD_10	3
18	LINC01578	AC013394.2	ASO_G0272888_04	3
19	AC016747.3	AC016747.3	ASO_G0212978_03	4
20	AC016747.3	AC016747.3	ASO_G0212978_04	4
21	AC016747.3	AC016747.3	ASO_G0212978_02	4
22	AC016747.3	AC016747.3	ASO_G0212978_01	4
23	LINC01116	AC017048.3	ASO_G0163364_AD_01	3
24	LINC01116	AC017048.3	ASO_G0163364_04	3
25	LINC01116	AC017048.3	ASO_G0163364_06	3
26	LINC01117	AC017048.4	ASO_G0224577_01	4
27	LINC01117	AC017048.4	ASO_G0224577_AD_05	4
28	LINC01117	AC017048.4	ASO_G0224577_05	4
29	LINC01117	AC017048.4	ASO_G0224577_02	4
30	LSP1P4	AC027612.6	ASO_G0143429_05	1
31	ZFAND2A-DT	AC091729.9	ASO_G0229043_AD_04	2
32	ZFAND2A-DT	AC091729.9	ASO_G0229043_07	2
33	ZNF529-AS1	AC092295.7	ASO_G0233527_03	3
34	ZNF529-AS1	AC092295.7	ASO_G0233527_02	3
35	ZNF529-AS1	AC092295.7	ASO_G0233527_07	3
36	RNASEH1-AS1	AC108488.3	ASO_G0234171_06	5
37	RNASEH1-AS1	AC108488.3	ASO_G0234171_03	5
38	RNASEH1-AS1	AC108488.3	ASO_G0234171_09	5
39	RNASEH1-AS1	AC108488.3	ASO_G0234171_01	5
40	RNASEH1-AS1	AC108488.3	ASO_G0234171_02	5
41	AC124789.1	AC124789.1	ASO_G0260833_06	1
42	AMZ2P1	AMZ2P1	ASO_G0214174_02	2
43	AMZ2P1	AMZ2P1	ASO_G0214174_06	2
44	FAM111A-DT	AP001258.4	ASO_G0245571_06	1
45	BOLA3-AS1	BOLA3-AS1	ASO_G0225439_06	1
46	BX322557.10	BX322557.10	ASO_G0215447_01	2
47	BX322557.10	BX322557.10	ASO_G0215447_03	2
48	C11orf95	C11orf95	ASO_G0188070_AD_05	1
49	CATG00000016989.1	CATG00000016989.1	ASO_C0020443_06	2
50	CATG00000016989.1	CATG00000016989.1	ASO_C0020443_03	2
51	CATG00000020700.1	CATG00000020700.1	ASO_C0020984_09	2
52	CATG00000020700.1	CATG00000020700.1	ASO_C0020984_02	2
53	CATG00000079799.1	CATG00000079799.1	ASO_C0008586_03	1
54	CATG00000089639.1	CATG00000089639.1	ASO_G0223811_06	2
55	CATG00000089639.1	CATG00000089639.1	ASO_G0223811_04	2
56	CATG00000095991.1	CATG00000095991.1	ASO_C0012015_07	4
57	CATG00000095991.1	CATG00000095991.1	ASO_C0012015_AD_04	4
58	CATG00000095991.1	CATG00000095991.1	ASO_C0012015_AD_05	4
59	CATG00000095991.1	CATG00000095991.1	ASO_C0012015_AD_02	4
60	CATG00000098831.1	CATG00000098831.1	ASO_C0013510_06	1
61	CATG00000108369.1	CATG00000108369.1	ASO_C014559_06	1
62	CD27-AS1	CD27-AS1	ASO_G0215039_01	1
63	CD99P1	CD99P1	ASO_G0223773_06	3
64	CD99P1	CD99P1	ASO_G0223773_07	3
65	CD99P1	CD99P1	ASO_G0223773_05	3
66	CKMT2-AS1	CKMT2-AS1	ASO_G0247572_08	2
67	CKMT2-AS1	CKMT2-AS1	ASO_G0247572_09	2
68	MIATNB	CTA-211A9.5	ASO_G0244625_09	4
69	MIATNB	CTA-211A9.5	ASO_G0244625_AD_09	4
70	MIATNB	CTA-211A9.5	ASO_G0244625_AD_08	4
71	MIATNB	CTA-211A9.5	ASO_G0244625_04	4
72	LINC01184	CTC-228N24.3	ASO_G0245937_AD_05	3
73	LINC01184	CTC-228N24.3	ASO_G0245937_01	3
74	LINC01184	CTC-228N24.3	ASO_G0245937_AD_02	3
75	CTC-338M12.4	CTC-338M12.4	ASO_G0233937_05	1
76	ZNF56	CTC-559E9.6	ASO_G0267419_AD_04	2
77	ZNF56	CTC-559E9.6	ASO_G0267419_AD_06	2
78	ZNF433-AS1	CTD-2006C1.2	ASO_G0219665_AD_04	3
79	ZNF433-AS1	CTD-2006C1.2	ASO_G0219665_AD_08	3
80	ZNF433-AS1	CTD-2006C1.2	ASO_G0219665_08	3
81	CTD-2319I12.4	CTD-2319I12.4	ASO_G0267248_AD_07	2
82	CTD-2319I12.4	CTD-2319I12.4	ASO_G0267248_AD_03	2
83	CTD-2336O2.1	CTD-2336O2.1	ASO_G0253982_AD_01	1
84	CTD-2587H24.5	CTD-2587H24.5	ASO_G0267577_03	2
85	CTD-2587H24.5	CTD-2587H24.5	ASO_G0267577_01	2
86	CTD-2651B20.3	CTD-2651B20.3	ASO_G0259520_AD_04	2
87	CTD-2651B20.3	CTD-2651B20.3	ASO_G0259520_AD_08	2
88	ZNF528-AS1	CTD-3018O17.3	ASO_G0269834_AD_06	3
89	ZNF528-AS1	CTD-3018O17.3	ASO_G0269834_AD_02	3
90	ZNF528-AS1	CTD-3018O17.3	ASO_G0269834_02	3
91	CTD-3131K8.2	CTD-3131K8.2	ASO_G0269439_09	1
92	DANCR	DANCR	ASO_G0226950_02	4
93	DANCR	DANCR	ASO_G0226950_04	4
94	DANCR	DANCR	ASO_G0226950_05	4
95	DANCR	DANCR	ASO_G0226950_AD_07	4
96	DNAJC27-AS1	DNAJC27-AS1	ASO_G0224165_AD_07	2
97	DNAJC27-AS1	DNAJC27-AS1	ASO_G0224165_10	2
98	DNM3OS	DNM3OS	ASO_G0230630_AD_10	2
99	DNM3OS	DNM3OS	ASO_G0230630_AD_04	2
100	EMX2OS	EMX2OS	ASO_G0229847_AD_04	4
101	EMX2OS	EMX2OS	ASO_G0229847_01	4
102	EMX2OS	EMX2OS	ASO_G0229847_AD_02	4
103	EMX2OS	EMX2OS	ASO_G0229847_03	4
104	ERVK13-1	ERVK13-1	ASO_G0260565_AD_08	2
105	ERVK13-1	ERVK13-1	ASO_G0260565_AD_06	2
106	ERVK3-1	ERVK3-1	ASO_G0142396_AD_01	2
107	ERVK3-1	ERVK3-1	ASO_G0142396_AD_07	2
108	FBXL19-AS1	FBXL19-AS1	ASO_G0260852_02	1
109	FGD5-AS1	FGD5-AS1	ASO_G0225733_AD_06	4
110	FGD5-AS1	FGD5-AS1	ASO_G0225733_AD_03	4
111	FGD5-AS1	FGD5-AS1	ASO_G0225733_04	4
112	FGD5-AS1	FGD5-AS1	ASO_G0225733_03	4
113	FLVCR1-DT	FLVCR1-AS1	ASO_G0198468_01	3
114	FLVCR1-DT	FLVCR1-AS1	ASO_G0198468_03	3
115	FLVCR1-DT	FLVCR1-AS1	ASO_G0198468_07	3
116	FOXN3-AS1	FOXN3-AS1	ASO_G0258920_AD_07	1
117	FTX	FTX	ASO_G0230590_06	5
118	FTX	FTX	ASO_G0230590_05	5
119	FTX	FTX	ASO_G0230590_AD_03	5
120	FTX	FTX	ASO_G0230590_AD_02	5
121	FTX	FTX	ASO_G0230590_02	5
122	JPX	JPX	ASO_G0225470_05	2
123	JPX	JPX	ASO_G0225470_AD_04	2
124	KTN1-AS1	KTN1-AS1	ASO_G0186615_03	3
125	KTN1-AS1	KTN1-AS1	ASO_G0186615_04	3
126	KTN1-AS1	KTN1-AS1	ASO_G0186615_09	3
127	LINC00339	LINC00339	ASO_G0218510_AD_06	3
128	LINC00339	LINC00339	ASO_G0218510_AD_03	3
129	LINC00339	LINC00339	ASO_G0218510_04	3
130	LINC00511	LINC00511	ASO_G0227036_04	2
131	LINC00511	LINC00511	ASO_G0227036_AD_07	2
132	LINC00517	LINC00517	ASO_G0259091_AD_10	3
133	LINC00517	LINC00517	ASO_G0259091_AD_04	3
134	LINC00517	LINC00517	ASO_G0259091_01	3
135	LINC00630	LINC00630	ASO_G0223546_02	2
136	LINC00630	LINC00630	ASO_G0223546_01	2
137	LINC00654	LINC00654	ASO_G0205181_01	1
138	NORAD	LINC00657	ASO_G0260032_AD_01	2
139	NORAD	LINC00657	ASO_G0260032_AD_06	2
140	LINC00667	LINC00667	ASO_G0263753_AD_01	2
141	LINC00667	LINC00667	ASO_G0263753_AD_06	2
142	LINC00674	LINC00674	ASO_G0237854_05	3
143	LINC00674	LINC00674	ASO_G0237854_AD_02	3
144	LINC00674	LINC00674	ASO_G0237854_AD_04	3
145	LINC00702	LINC00702	ASO_G0233117_02	2
146	LINC00702	LINC00702	ASO_G0233117_04	2
147	LINC00707	LINC00707	ASO_G0238266_AD_06	2
148	LINC00707	LINC00707	ASO_G0238266_03	2
149	LINC00856	LINC00856	ASO_G0230417_01	2
150	LINC00856	LINC00856	ASO_G0230417_02	2
151	LINC00862	LINC00862	ASO_G0203721_02	2
152	LINC00862	LINC00862	ASO_G0203721_05	2
153	DUBR	LINC00883	ASO_G0243701_01	3
154	DUBR	LINC00883	ASO_G0243701_AD_09	3
155	DUBR	LINC00883	ASO_G0243701_AD_08	3
156	LINC00886	LINC00886	ASO_G0240875_03	5
157	LINC00886	LINC00886	ASO_G0240875_10	5
158	LINC00886	LINC00886	ASO_G0240875_02	5
159	LINC00886	LINC00886	ASO_G0240875_04	5
160	LINC00886	LINC00886	ASO_G0240875_01	5
161	LINC00938	LINC00938	ASO_G0273015_AD_07	3
162	LINC00938	LINC00938	ASO_G0273015_AD_10	3
163	LINC00938	LINC00938	ASO_G0273015_05	3
164	C10orf143	LINC00959	ASO_G0237489_AD_01	2
165	C10orf143	LINC00959	ASO_G0237489_09	2
166	LINC00963	LINC00963	ASO_G0204054_01	3
167	LINC00963	LINC00963	ASO_G0204054_06	3
168	LINC00963	LINC00963	ASO_G0204054_10	3
169	LINC00968	LINC00968	ASO_G0246430_03	2
170	LINC00968	LINC00968	ASO_G0246430_AD_03	2
171	PPM1F-AS1	LL22NC03-86G7.1	ASO_G0224086_04	3
172	PPM1F-AS1	LL22NC03-86G7.1	ASO_G0224086_03	3
173	PPM1F-AS1	LL22NC03-86G7.1	ASO_G0224086_06	3
174	MAGI2-AS3	MAGI2-AS3	ASO_G0234456_04	2
175	MAGI2-AS3	MAGI2-AS3	ASO_G0234456_01	2
176	MAPKAPK5-AS1	MAPKAPK5-AS1	ASO_G0234608_AD_04	3
177	MAPKAPK5-AS1	MAPKAPK5-AS1	ASO_G0234608_AD_01	3
178	MAPKAPK5-AS1	MAPKAPK5-AS1	ASO_G0234608_06	3
179	MEG3	MEG3	ASO_G0214548_01	3
180	MEG3	MEG3	ASO_G0214548_AD_09	3
181	MEG3	MEG3	ASO_G0214548_AD_06	3
182	MELTF-AS1	MFI2-AS1	ASO_G0228109_06	2
183	MELTF-AS1	MFI2-AS1	ASO_G0228109_07	2
184	MKLN1-AS	MKLN1-AS2	ASO_G0236753_AD_01	1
185	NNT-AS1	NNT-AS1	ASO_G0248092_AD_10	1
186	NR2F1-AS1	NR2F1-AS1	ASO_G0237187_AD_08	4
187	NR2F1-AS1	NR2F1-AS1	ASO_G0237187_01	4
188	NR2F1-AS1	NR2F1-AS1	ASO_G0237187_03	4
189	NR2F1-AS1	NR2F1-AS1	ASO_G0237187_AD_01	4
190	PCAT6	PCAT6	ASO_G0228288_01	1
191	PITPNA-AS1	PITPNA-AS1	ASO_G0236618_AD_07	2
192	PITPNA-AS1	PITPNA-AS1	ASO_G0236618_AD_09	2
193	PRRT3-AS1	PRRT3-AS1	ASO_G0230082_01	1
194	PTCHD3P1	PTCHD3P1	ASO_G0224597_AD_04	3
195	PTCHD3P1	PTCHD3P1	ASO_G0224597_05	3
196	PTCHD3P1	PTCHD3P1	ASO_G0224597_06	3
197	RAB30-DT	RAB30-AS1	ASO_G0246067_AD_06	5
198	RAB30-DT	RAB30-AS1	ASO_G0246067_01	5
199	RAB30-DT	RAB30-AS1	ASO_G0246067_AD_04	5
200	RAB30-DT	RAB30-AS1	ASO_G0246067_AD_09	5
201	RAB30-DT	RAB30-AS1	ASO_G0246067_05	5
202	RAD51-AS1	RAD51-AS1	ASO_G0245849_AD_07	1
203	RP1-152L7.5	RP1-152L7.5	ASO_G0216775_01	2
204	RP1-152L7.5	RP1-152L7.5	ASO_G0216775_03	2
205	RP11-10K16.1	RP11-10K16.1	ASO_G0245213_AD_04	3
206	RP11-10K16.1	RP11-10K16.1	ASO_G0245213_04	3
207	RP11-10K16.1	RP11-10K16.1	ASO_G0245213_AD_03	3
208	CCDC84-DT	RP11-110I1.12	ASO_G0255121_02	3
209	CCDC84-DT	RP11-110I1.12	ASO_G0255121_03	3
210	CCDC84-DT	RP11-110I1.12	ASO_G0255121_08	3
211	RP11-115C21.2	RP11-115C21.2	ASO_G0246089_02	1
212	PPP3CB-AS1	RP11-137L10.6	ASO_G0221817_AD_08	2
213	PPP3CB-AS1	RP11-137L10.6	ASO_G0221817_04	2
214	PIGBOS1	RP11-139H15.1	ASO_G0225973_10	2
215	PIGBOS1	RP11-139H15.1	ASO_G0225973_AD_01	2
216	RP11-149I23.3	RP11-149I23.3	ASO_G0232110_AD_02	2
217	RP11-149I23.3	RP11-149I23.3	ASO_G0232110_AD_06	2
218	LINC01605	RP11-150O12.1	ASO_C013368_02	2
219	LINC01605	RP11-150O12.1	ASO_C013368_01	2
220	LMO7-AS1	RP11-173B14.5	ASO_G0261105_AD_05	3
221	LMO7-AS1	RP11-173B14.5	ASO_G0261105_AD_06	3
222	LMO7-AS1	RP11-173B14.5	ASO_G0261105_AD_10	3
223	RP11-195F19.9	RP11-195F19.9	ASO_G0230074_05	2
224	RP11-195F19.9	RP11-195F19.9	ASO_G0230074_07	2
225	RP11-220I1.1	RP11-220I1.1	ASO_G0233137_04	3
226	RP11-220I1.1	RP11-220I1.1	ASO_G0233137_02	3
227	RP11-220I1.1	RP11-220I1.1	ASO_G0233137_05	3
228	LINC02454	RP11-221N13.3	ASO_G0256268_AD_06	3
229	LINC02454	RP11-221N13.3	ASO_G0256268_AD_07	3
230	LINC02454	RP11-221N13.3	ASO_G0256268_AD_03	3
231	RP11-295G20.2	RP11-295G20.2	ASO_G0233461_AD_03	1
232	PRDX6-AS1	RP11-296O14.3	ASO_G0203739_10	2
233	PRDX6-AS1	RP11-296O14.3	ASO_G0203739_AD_03	2
234	RP11-333E1.1	RP11-333E1.1	ASO_G0261879_AD_07	1
235	RP11-33B1.1	RP11-33B1.1	ASO_G0245958_AD_07	2
236	RP11-33B1.1	RP11-33B1.1	ASO_G0245958_AD_04	2
237	RP11-379H18.1	RP11-379H18.1	ASO_G0271122_05	2
238	RP11-379H18.1	RP11-379H18.1	ASO_G0271122_06	2
239	RP11-38L15.3	RP11-38L15.3	ASO_G0231187_07	2
240	RP11-38L15.3	RP11-38L15.3	ASO_G0231187_02	2
241	MUC12-AS1	RP11-395B7.4	ASO_G0227053_03	2
242	MUC12-AS1	RP11-395B7.4	ASO_G0227053_04	2
243	RP11-398K22.12	RP11-398K22.12	ASO_G0229852_05	3
244	RP11-398K22.12	RP11-398K22.12	ASO_G0229852_03	3
245	RP11-398K22.12	RP11-398K22.12	ASO_G0229852_AD_01	3
246	LINC01615	RP11-417E7.1	ASO_G0223485_01	3
247	LINC01615	RP11-417E7.1	ASO_G0223485_AD_04	3
248	LINC01615	RP11-417E7.1	ASO_G0223485_AD_06	3
249	LINC01137	RP11-422J8.1	ASO_G0233621_05	2
250	LINC01137	RP11-422J8.1	ASO_G0233621_01	2
251	LINC01719	RP11-458D21.1	ASO_G0233396_02	2
252	LINC01719	RP11-458D21.1	ASO_G0233396_07	2
253	ZNF213-AS1	RP11-473M20.14	ASO_G0263072_02	4
254	ZNF213-AS1	RP11-473M20.14	ASO_G0263072_01	4
255	ZNF213-AS1	RP11-473M20.14	ASO_G0263072_05	4
256	ZNF213-AS1	RP11-473M20.14	ASO_G0263072_06	4
257	RP11-474B16.1	RP11-474B16.1	ASO_G0257642_01	1
258	RP11-474P2.4	RP11-474P2.4	ASO_C0019316_01	2
259	RP11-474P2.4	RP11-474P2.4	ASO_C0019316_08	2
260	RP11-500C11.3	RP11-500C11.3	ASO_G0272269_06	1
261	RP11-527D7.1	RP11-527D7.1	ASO_G0225554_02	3
262	RP11-527D7.1	RP11-527D7.1	ASO_G0225554_AD_04	3
263	RP11-527D7.1	RP11-527D7.1	ASO_G0225554_AD_06	3
264	LINC02482	RP11-539L10.3	ASO_G0251580_AD_05	2
265	LINC02482	RP11-539L10.3	ASO_G0251580_AD_01	2
266	RP11-545E17.3	RP11-545E17.3	ASO_G0223478_03	1
267	LNCOG	RP11-54A9.1	ASO_G0257219_AD_10	3
268	LNCOG	RP11-54A9.1	ASO_G0257219_AD_05	3
269	LNCOG	RP11-54A9.1	ASO_G0257219_09	3
270	RP11-553K8.5	RP11-553K8.5	ASO_G0261573_AD_04	2
271	RP11-553K8.5	RP11-553K8.5	ASO_G0261573_AD_06	2
272	PRANCR	RP11-611E13.2	ASO_G0257815_AD_03	2
273	PRANCR	RP11-611E13.2	ASO_G0257815_01	2
274	NBDY	RP11-622K12.1	ASO_G0204272_04	2
275	NBDY	RP11-622K12.1	ASO_G0204272_03	2
276	LINC01503	RP11-65J3.1	ASO_G0233901_05	3
277	LINC01503	RP11-65J3.1	ASO_G0233901_02	3
278	LINC01503	RP11-65J3.1	ASO_G0233901_04	3
279	RP11-660L16.2	RP11-660L16.2	ASO_G0254682_02	2
280	RP11-660L16.2	RP11-660L16.2	ASO_G0254682_06	2
281	RP11-6N17.4	RP11-6N17.4	ASO_G0264920_AD_02	1
282	LINC02381	RP11-834C11.4	ASO_G0250742_AD_04	3
283	LINC02381	RP11-834C11.4	ASO_G0250742_AD_05	3
284	LINC02381	RP11-834C11.4	ASO_G0250742_01	3
285	SRP54-AS1	RP11-85K15.2	ASO_G0258704_09	1
286	RP13-20L14.6	RP13-20L14.6	ASO_G0265458_AD_03	1
287	LASTR	RP13-463N16.6	ASO_G0242147_05	2
288	LASTR	RP13-463N16.6	ASO_G0242147_07	2
289	MIR34AHG	RP3-510D11.1	ASO_G0228526_10	1
290	LNCTAM34A	RP3-510D11.2	ASO_G0234546_07	3
291	LNCTAM34A	RP3-510D11.2	ASO_G0234546_01	3
292	LNCTAM34A	RP3-510D11.2	ASO_G0234546_02	3
293	INKA2-AS1	RP4-773A18.4	ASO_G0227811_06	1
294	NRSN2-AS1	RP5-1103G7.4	ASO_G0225377_AD_05	2
295	NRSN2-AS1	RP5-1103G7.4	ASO_G0225377_05	2
296	ELOA-AS1	RP5-886K2.3	ASO_G0236810_AD_02	2
297	ELOA-AS1	RP5-886K2.3	ASO_G0236810_AD_06	2
298	PRR34-AS1	RP6-109B7.3	ASO_G0241990_01	2
299	PRR34-AS1	RP6-109B7.3	ASO_G0241990_07	2
300	MIR222HG	RP6-99M1.2	ASO_G0270069_05	2
301	MIR222HG	RP6-99M1.2	ASO_G0270069_AD_07	2
302	SBF2-AS1	SBF2-AS1	ASO_G0246273_02	1
303	SERTAD4-AS1	SERTAD4-AS1	ASO_G0203706_01	1
304	SNHG18	SNHG18	ASO_G0250786_AD_10	2
305	SNHG18	SNHG18	ASO_G0250786_04	2
306	SOCS2-AS1	SOCS2-AS1	ASO_G0246985_AD_04	3
307	SOCS2-AS1	SOCS2-AS1	ASO_G0246985_AD_01	3
308	SOCS2-AS1	SOCS2-AS1	ASO_G0246985_10	3
309	SRP14-AS1	SRP14-AS1	ASO_G0248508_10	2
310	SRP14-AS1	SRP14-AS1	ASO_G0248508_04	2
311	SUGT1P1	SUGT1P	ASO_G0226823_03	2
312	SUGT1P1	SUGT1P	ASO_G0226823_08	2
313	TERC	TERC	ASO_G0270141_AD_10	2
314	TERC	TERC	ASO_G0270141_05	2
315	TMCC1-AS1	TMCC1-AS1	ASO_G0271270_AD_10	2
316	TMCC1-AS1	TMCC1-AS1	ASO_G0271270_09	2
317	TP53TG1	TP53TG1	ASO_G0182165_AD_04	3
318	TP53TG1	TP53TG1	ASO_G0182165_AD_10	3
319	TP53TG1	TP53TG1	ASO_G0182165_AD_08	3
320	TRAM2-AS1	TRAM2-AS1	ASO_G0225791_AD_05	2
321	TRAM2-AS1	TRAM2-AS1	ASO_G0225791_05	2
322	TTN-AS1	TTN-AS1	ASO_G0237298_01	2
323	TTN-AS1	TTN-AS1	ASO_G0237298_09	2
324	TUG1	TUG1	ASO_G0253352_02	5
325	TUG1	TUG1	ASO_G0253352_06	5
326	TUG1	TUG1	ASO_G0253352_AD_08	5
327	TUG1	TUG1	ASO_G0253352_01	5
328	TUG1	TUG1	ASO_G0253352_AD_07	5
329	U52111.14	U52111.14	ASO_G0232725_05	2
330	U52111.14	U52111.14	ASO_G0232725_AD_10	2
331	UBL7-AS1	UBL7-AS1	ASO_G0247240_AD_05	2
332	UBL7-AS1	UBL7-AS1	ASO_G0247240_AD_06	2
333	WDFY3-AS2	WDFY3-AS2	ASO_G0180769_AD_03	3
334	WDFY3-AS2	WDFY3-AS2	ASO_G0180769_03	3
335	WDFY3-AS2	WDFY3-AS2	ASO_G0180769_08	3
336	ZNF37BP	ZNF37BP	ASO_G0234420_01	1
337	ZNF674-AS1	ZNF674-AS1	ASO_G0230844_01	2
338	ZNF674-AS1	ZNF674-AS1	ASO_G0230844_AD_06	2
339	ZSCAN16-AS1	ZSCAN16-AS1	ASO_G0269293_01	2
340	ZSCAN16-AS1	ZSCAN16-AS1	ASO_G0269293_AD_10	2

## Sheet: Table S4C
	library_name	CAGE_Mapped	sample_id	lsid	perturb_id	KD.geneSymbol	KD.geneID	geneClass	Description
1	CNhi10473_TAC	12876672	F6-001-RNA-002-01H03-7822	2445	ASO_G0268895_01	A1BG-AS1	ENSG00000268895	lncRNA_divergent	Targeted lncRNA
2	CNhi10477_AGT	11829640	F6-001-RNA-002-01G03-9D19	2445	ASO_G0268895_01	A1BG-AS1	ENSG00000268895	lncRNA_divergent	Targeted lncRNA
3	CNhi10466_CAC	11847988	F6-001-RNA-002-01G02-BD92	2445	ASO_G0268895_03	A1BG-AS1	ENSG00000268895	lncRNA_divergent	Targeted lncRNA
4	CNhi10476_ACG	10613025	F6-001-RNA-002-01H02-C2A2	2445	ASO_G0268895_03	A1BG-AS1	ENSG00000268895	lncRNA_divergent	Targeted lncRNA
5	CNhi10493_GCG	10233297	F6-001-RNA-003-01B07-9D6D	2458	ASO_G0205485_01	AC004980.7	ENSG00000205485	pseudogene	Targeted lncRNA
6	CNhi10487_TAC	12587160	F6-001-RNA-003-01A08-49B6	2458	ASO_G0205485_03	AC004980.7	ENSG00000205485	pseudogene	Targeted lncRNA
7	CNhi10495_CAC	5684323	F6-001-RNA-003-01B08-FE58	2458	ASO_G0205485_03	AC004980.7	ENSG00000205485	pseudogene	Targeted lncRNA
8	CNhi10494_TAC	10011609	F6-001-RNA-003-01A07-C027	2458	ASO_G0205485_01	AC004980.7	ENSG00000205485	pseudogene	Targeted lncRNA
9	CNhi10466_AGT	11353550	F6-001-RNA-002-01H11-0274	2445	ASO_G0231185_03	AC005592.2	ENSG00000231185	lncRNA_divergent	Targeted lncRNA
10	CNhi10468_ACG	13323802	F6-001-RNA-002-01E11-B455	2445	ASO_G0231185_02	AC005592.2	ENSG00000231185	lncRNA_divergent	Targeted lncRNA
11	CNhi10474_AGT	9812298	F6-001-RNA-002-01G11-C569	2445	ASO_G0231185_03	AC005592.2	ENSG00000231185	lncRNA_divergent	Targeted lncRNA
12	CNhi10467_TAC	18563424	F6-001-RNA-002-01F11-1B1C	2445	ASO_G0231185_02	AC005592.2	ENSG00000231185	lncRNA_divergent	Targeted lncRNA
13	CNhi10492_ATG	14013082	F6-001-RNA-003-02D03-5C26	2458	ASO_G0231312_04	AC007246.3	ENSG00000231312	lncRNA_divergent	Targeted lncRNA
14	CNhi10495_ATG	8499738	F6-001-RNA-003-02C02-ABB2	2458	ASO_G0231312_02	AC007246.3	ENSG00000231312	lncRNA_divergent	Targeted lncRNA
15	CNhi10493_ATG	13274155	F6-001-RNA-003-02D02-077D	2458	ASO_G0231312_02	AC007246.3	ENSG00000231312	lncRNA_divergent	Targeted lncRNA
16	CNhi10492_ACG	11519040	F6-001-RNA-003-02C03-4EF7	2458	ASO_G0231312_04	AC007246.3	ENSG00000231312	lncRNA_divergent	Targeted lncRNA
17	CNhi10586_CAC	8054497	F6-001-RNA-009-03A03-A24D	2562	ASO_G0267213_10	AC007773.2	ENSG00000267213	lncRNA_divergent	Failed QC
18	CNhi10586_AGT	8397231	F6-001-RNA-009-03B03-3B12	2562	ASO_G0267213_10	AC007773.2	ENSG00000267213	lncRNA_divergent	Failed QC
19	CNhi10585_TAC	10456075	F6-001-RNA-009-03C02-2B85	2562	ASO_G0267213_03	AC007773.2	ENSG00000267213	lncRNA_divergent	Failed QC
20	CNhi10585_ATG	8439480	F6-001-RNA-009-03B01-4E56	2562	ASO_G0267213_01	AC007773.2	ENSG00000267213	lncRNA_divergent	Failed QC
21	CNhi10586_ACC	8075021	F6-001-RNA-009-03D03-580D	2562	ASO_G0267213_06	AC007773.2	ENSG00000267213	lncRNA_divergent	Failed QC
22	CNhi10585_GCT	8473807	F6-001-RNA-009-03C03-9AA5	2562	ASO_G0267213_06	AC007773.2	ENSG00000267213	lncRNA_divergent	Failed QC
23	CNhi10585_ACG	9520906	F6-001-RNA-009-03D02-0461	2562	ASO_G0267213_03	AC007773.2	ENSG00000267213	lncRNA_divergent	Failed QC
24	CNhi10585_GCG	9727478	F6-001-RNA-009-03A01-0F77	2562	ASO_G0267213_01	AC007773.2	ENSG00000267213	lncRNA_divergent	Failed QC
25	CNhi10474_ACC	8842175	F6-001-RNA-002-02B01-6683	2445	ASO_G0229647_06	AC007879.7	ENSG00000229647	lncRNA_intergenic	Targeted lncRNA
26	CNhi10788_GCG	11239751	F6-001-RNA-015-02C06-C631	2860	ASO_G0229647_AD_09	AC007879.7	ENSG00000229647	lncRNA_intergenic	Targeted lncRNA
27	CNhi10793_ATG	13285810	F6-001-RNA-015-02D06-63BE	2860	ASO_G0229647_AD_09	AC007879.7	ENSG00000229647	lncRNA_intergenic	Targeted lncRNA
28	CNhi10469_TAC	16502006	F6-001-RNA-002-02A01-12A6	2445	ASO_G0229647_06	AC007879.7	ENSG00000229647	lncRNA_intergenic	Targeted lncRNA
29	CNhi10785_CAC	11072750	F6-001-RNA-016-04F05-5113	2860	ASO_G0267751_AD_02	AC009005.2	ENSG00000267751	lncRNA_divergent	Targeted lncRNA
30	CNhi10587_AGT	6040367	F6-001-RNA-009-03E11-0435	2562	ASO_G0267751_07	AC009005.2	ENSG00000267751	lncRNA_divergent	Failed QC
31	CNhi10792_GCG	8236065	F6-001-RNA-016-04E05-EDA3	2860	ASO_G0267751_AD_02	AC009005.2	ENSG00000267751	lncRNA_divergent	Targeted lncRNA
32	CNhi10587_GCG	10433561	F6-001-RNA-009-03F11-D76E	2562	ASO_G0267751_07	AC009005.2	ENSG00000267751	lncRNA_divergent	Failed QC
33	CNhi10793_TAC	11981120	F6-001-RNA-015-01D12-94EC	2860	ASO_G0223960_AD_10	AC009948.5	ENSG00000223960	lncRNA_intergenic	Targeted lncRNA
34	CNhi10487_AGT	12737582	F6-001-RNA-003-04B09-13BC	2458	ASO_G0223960_08	AC009948.5	ENSG00000223960	lncRNA_intergenic	Targeted lncRNA
35	CNhi10787_ACG	16111000	F6-001-RNA-015-01C12-056A	2860	ASO_G0223960_AD_10	AC009948.5	ENSG00000223960	lncRNA_intergenic	Targeted lncRNA
36	CNhi10486_GCG	13565489	F6-001-RNA-003-04A09-C398	2458	ASO_G0223960_08	AC009948.5	ENSG00000223960	lncRNA_intergenic	Targeted lncRNA
37	CNhi10537_ATG	10942455	F6-001-RNA-006-02G04-35D2	2515	ASO_G0234327_01	AC012146.7	ENSG00000234327	lncRNA_divergent	Targeted lncRNA
38	CNhi10534_GCG	5786327	F6-001-RNA-006-02H05-A1AF	2515	ASO_G0234327_07	AC012146.7	ENSG00000234327	lncRNA_divergent	Targeted lncRNA
39	CNhi10538_AGT	11173279	F6-001-RNA-006-02H04-1077	2515	ASO_G0234327_01	AC012146.7	ENSG00000234327	lncRNA_divergent	Targeted lncRNA
40	CNhi10544_CAC	6960479	F6-001-RNA-006-02G05-C9FD	2515	ASO_G0234327_07	AC012146.7	ENSG00000234327	lncRNA_divergent	Targeted lncRNA
41	CNhi10787_AGT	10552234	F6-001-RNA-017-05E06-A2A0	2860	ASO_G0272888_AD_07	AC013394.2	ENSG00000272888	lncRNA_sense_intronic	Targeted lncRNA
42	CNhi10783_ACG	17380958	F6-001-RNA-017-05E08-6960	2860	ASO_G0272888_AD_10	AC013394.2	ENSG00000272888	lncRNA_sense_intronic	Targeted lncRNA
43	CNhi10788_ACG	14205482	F6-001-RNA-017-05F06-B0E2	2860	ASO_G0272888_AD_07	AC013394.2	ENSG00000272888	lncRNA_sense_intronic	Targeted lncRNA
44	CNhi10604_GCT	12306081	F6-001-RNA-010-02B05-CD98	2577	ASO_G0272888_04	AC013394.2	ENSG00000272888	lncRNA_sense_intronic	Targeted lncRNA
45	CNhi10783_AGT	11452018	F6-001-RNA-017-05F08-4EC2	2860	ASO_G0272888_AD_10	AC013394.2	ENSG00000272888	lncRNA_sense_intronic	Targeted lncRNA
46	CNhi10611_ATG	6663662	F6-001-RNA-010-02A05-3163	2577	ASO_G0272888_04	AC013394.2	ENSG00000272888	lncRNA_sense_intronic	Targeted lncRNA
47	CNhi10471_GCT	12709073	F6-001-RNA-002-02H11-A60C	2445	ASO_G0212978_03	AC016747.3	ENSG00000212978	lncRNA_divergent	Targeted lncRNA
48	CNhi10473_ACG	11363467	F6-001-RNA-002-02F10-A785	2445	ASO_G0212978_04	AC016747.3	ENSG00000212978	lncRNA_divergent	Targeted lncRNA
49	CNhi10466_ACC	14899037	F6-001-RNA-002-02G11-240F	2445	ASO_G0212978_03	AC016747.3	ENSG00000212978	lncRNA_divergent	Targeted lncRNA
50	CNhi10471_TAC	14776189	F6-001-RNA-002-02F11-80EE	2445	ASO_G0212978_02	AC016747.3	ENSG00000212978	lncRNA_divergent	Targeted lncRNA
51	CNhi10466_ACG	10682581	F6-001-RNA-002-02H12-01A7	2445	ASO_G0212978_01	AC016747.3	ENSG00000212978	lncRNA_divergent	Targeted lncRNA
52	CNhi10474_CAC	8523609	F6-001-RNA-002-02E10-A465	2445	ASO_G0212978_04	AC016747.3	ENSG00000212978	lncRNA_divergent	Targeted lncRNA
53	CNhi10473_AGT	12110849	F6-001-RNA-002-02E11-86E8	2445	ASO_G0212978_02	AC016747.3	ENSG00000212978	lncRNA_divergent	Targeted lncRNA
54	CNhi10472_GCG	10023103	F6-001-RNA-002-02G12-4FDE	2445	ASO_G0212978_01	AC016747.3	ENSG00000212978	lncRNA_divergent	Targeted lncRNA
55	CNhi10637_GCT	9284104	F6-001-RNA-012-01H01-DCB1	2601	ASO_G0163364_AD_01	AC017048.3	ENSG00000163364	lncRNA_intergenic	Targeted lncRNA
56	CNhi10457_CAC	8850111	F6-001-RNA-001-03E02-F4CA	2415	ASO_G0163364_04	AC017048.3	ENSG00000163364	lncRNA_intergenic	Targeted lncRNA
57	CNhi10458_ATG	13078981	F6-001-RNA-001-03G03-0E69	2415	ASO_G0163364_06	AC017048.3	ENSG00000163364	lncRNA_intergenic	Targeted lncRNA
58	CNhi10463_ACC	14149693	F6-001-RNA-001-01E02-9FCC	2415	ASO_G0163364_04	AC017048.3	ENSG00000163364	lncRNA_intergenic	Targeted lncRNA
59	CNhi10636_GCT	12137616	F6-001-RNA-012-01G01-A7E5	2601	ASO_G0163364_AD_01	AC017048.3	ENSG00000163364	lncRNA_intergenic	Targeted lncRNA
60	CNhi10461_ACC	14371297	F6-001-RNA-001-01G03-4AE8	2415	ASO_G0163364_06	AC017048.3	ENSG00000163364	lncRNA_intergenic	Targeted lncRNA
61	CNhi10457_ACC	16172572	F6-001-RNA-001-01A07-FCE5	2415	ASO_G0224577_01	AC017048.4	ENSG00000224577	lncRNA_intergenic	Targeted lncRNA
62	CNhi10637_TAC	12571160	F6-001-RNA-012-01C08-AC7F	2601	ASO_G0224577_AD_05	AC017048.4	ENSG00000224577	lncRNA_intergenic	Targeted lncRNA
63	CNhi10631_TAC	11522319	F6-001-RNA-012-01D08-5B40	2601	ASO_G0224577_AD_05	AC017048.4	ENSG00000224577	lncRNA_intergenic	Targeted lncRNA
64	CNhi10459_AGT	15942337	F6-001-RNA-001-01A09-0A06	2415	ASO_G0224577_05	AC017048.4	ENSG00000224577	lncRNA_intergenic	Targeted lncRNA
65	CNhi10455_TAC	14961181	F6-001-RNA-001-03A09-8E5F	2415	ASO_G0224577_05	AC017048.4	ENSG00000224577	lncRNA_intergenic	Targeted lncRNA
66	CNhi10452_ACC	17161188	F6-001-RNA-001-01C08-796C	2415	ASO_G0224577_02	AC017048.4	ENSG00000224577	lncRNA_intergenic	Targeted lncRNA
67	CNhi10458_ACC	13811391	F6-001-RNA-001-03C08-0A7B	2415	ASO_G0224577_02	AC017048.4	ENSG00000224577	lncRNA_intergenic	Targeted lncRNA
68	CNhi10454_ACC	13105569	F6-001-RNA-001-03A07-45CD	2415	ASO_G0224577_01	AC017048.4	ENSG00000224577	lncRNA_intergenic	Targeted lncRNA
69	CNhi10466_GCT	11466082	F6-001-RNA-002-03C05-7096	2445	ASO_G0143429_05	AC027612.6	ENSG00000143429	pseudogene	Targeted lncRNA
70	CNhi10470_GCT	12464485	F6-001-RNA-002-03D05-D8C6	2445	ASO_G0143429_05	AC027612.6	ENSG00000143429	pseudogene	Targeted lncRNA
71	CNhi10836_GCG	7113106	F6-001-RNA-021-02E05-32AA	2861	ASO_G0229043_AD_04	AC091729.9	ENSG00000229043	lncRNA_divergent	Targeted lncRNA
72	CNhi10493_ACG	8947729	F6-001-RNA-003-04G09-C933	2458	ASO_G0229043_07	AC091729.9	ENSG00000229043	lncRNA_divergent	Targeted lncRNA
73	CNhi10805_ATG	10179059	F6-001-RNA-021-02F05-EFB1	2861	ASO_G0229043_AD_04	AC091729.9	ENSG00000229043	lncRNA_divergent	Targeted lncRNA
74	CNhi10494_AGT	10336995	F6-001-RNA-003-04H09-F115	2458	ASO_G0229043_07	AC091729.9	ENSG00000229043	lncRNA_divergent	Targeted lncRNA
75	CNhi10539_ACC	8463302	F6-001-RNA-006-02A02-6D81	2515	ASO_G0233527_03	AC092295.7	ENSG00000233527	lncRNA_divergent	Targeted lncRNA
76	CNhi10539_GCT	11149307	F6-001-RNA-006-02C02-6DF8	2515	ASO_G0233527_02	AC092295.7	ENSG00000233527	lncRNA_divergent	Targeted lncRNA
77	CNhi10534_ACC	6908055	F6-001-RNA-006-02A03-70FF	2515	ASO_G0233527_07	AC092295.7	ENSG00000233527	lncRNA_divergent	Targeted lncRNA
78	CNhi10535_ACC	10104912	F6-001-RNA-006-02B02-A2D2	2515	ASO_G0233527_03	AC092295.7	ENSG00000233527	lncRNA_divergent	Targeted lncRNA
79	CNhi10533_GCT	6669331	F6-001-RNA-006-02D02-845D	2515	ASO_G0233527_02	AC092295.7	ENSG00000233527	lncRNA_divergent	Targeted lncRNA
80	CNhi10533_ATG	8166022	F6-001-RNA-006-02B03-8B74	2515	ASO_G0233527_07	AC092295.7	ENSG00000233527	lncRNA_divergent	Targeted lncRNA
81	CNhi10490_GCG	12048829	F6-001-RNA-003-02E02-1CC0	2458	ASO_G0234171_06	AC108488.3	ENSG00000234171	lncRNA_divergent	Targeted lncRNA
82	CNhi10488_GCG	8650012	F6-001-RNA-003-02G02-6DBB	2458	ASO_G0234171_03	AC108488.3	ENSG00000234171	lncRNA_divergent	Targeted lncRNA
83	CNhi10496_ACG	9668546	F6-001-RNA-003-02F02-B2A2	2458	ASO_G0234171_06	AC108488.3	ENSG00000234171	lncRNA_divergent	Targeted lncRNA
84	CNhi10493_CAC	6779847	F6-001-RNA-003-02G03-DB1D	2458	ASO_G0234171_09	AC108488.3	ENSG00000234171	lncRNA_divergent	Targeted lncRNA
85	CNhi10492_GCG	8299198	F6-001-RNA-003-02G01-385B	2458	ASO_G0234171_01	AC108488.3	ENSG00000234171	lncRNA_divergent	Targeted lncRNA
86	CNhi10497_ACC	9673436	F6-001-RNA-003-02H01-2E96	2458	ASO_G0234171_01	AC108488.3	ENSG00000234171	lncRNA_divergent	Targeted lncRNA
87	CNhi10490_TAC	11336464	F6-001-RNA-003-02E01-25EB	2458	ASO_G0234171_02	AC108488.3	ENSG00000234171	lncRNA_divergent	Targeted lncRNA
88	CNhi10491_ACG	10460818	F6-001-RNA-003-02H02-4A9F	2458	ASO_G0234171_03	AC108488.3	ENSG00000234171	lncRNA_divergent	Targeted lncRNA
89	CNhi10494_ACC	8287005	F6-001-RNA-003-02H03-320C	2458	ASO_G0234171_09	AC108488.3	ENSG00000234171	lncRNA_divergent	Targeted lncRNA
90	CNhi10491_CAC	7087076	F6-001-RNA-003-02F01-0ABF	2458	ASO_G0234171_02	AC108488.3	ENSG00000234171	lncRNA_divergent	Targeted lncRNA
91	CNhi10496_CAC	7435162	F6-001-RNA-003-03F05-80A9	2458	ASO_G0260833_06	AC124789.1	ENSG00000260833	lncRNA_antisense	Targeted lncRNA
92	CNhi10488_CAC	10552120	F6-001-RNA-003-03E05-8374	2458	ASO_G0260833_06	AC124789.1	ENSG00000260833	lncRNA_antisense	Targeted lncRNA
93	CNhi10532_ACG	10218757	F6-001-RNA-005-01B09-AAC6	2514	ASO_C0011632_10	AHR	ENSG00000106546	coding_mRNA	Positive Control
94	CNhi10530_TAC	7068078	F6-001-RNA-005-01A09-FBB5	2514	ASO_C0011632_10	AHR	ENSG00000106546	coding_mRNA	Positive Control
95	CNhi10523_ACC	13591271	F6-001-RNA-005-01C08-D25B	2514	ASO_C0011632_03	AHR	ENSG00000106546	coding_mRNA	Positive Control
96	CNhi10834_ACC	10257049	F6-001-RNA-018-01A07-6110	2861	ASO_C0011632_AD_01	AHR	ENSG00000106546	coding_mRNA	Positive Control
97	CNhi10805_AGT	7311695	F6-001-RNA-018-01B07-CF52	2861	ASO_C0011632_AD_01	AHR	ENSG00000106546	coding_mRNA	Positive Control
98	CNhi10801_ACG	9914047	F6-001-RNA-018-01B08-CD80	2861	ASO_C0011632_AD_03	AHR	ENSG00000106546	coding_mRNA	Positive Control
99	CNhi10835_ACG	10251246	F6-001-RNA-018-01A08-0490	2861	ASO_C0011632_AD_03	AHR	ENSG00000106546	coding_mRNA	Positive Control
100	CNhi10522_ACC	14279670	F6-001-RNA-005-01D08-B4D1	2514	ASO_C0011632_03	AHR	ENSG00000106546	coding_mRNA	Positive Control
101	CNhi10538_ATG	10809626	F6-001-RNA-005-03G10-E153	2515	ASO_G0214174_02	AMZ2P1	ENSG00000214174	pseudogene	Targeted lncRNA
102	CNhi10534_CAC	6886998	F6-001-RNA-005-03E11-B813	2515	ASO_G0214174_06	AMZ2P1	ENSG00000214174	pseudogene	Targeted lncRNA
103	CNhi10534_TAC	8998210	F6-001-RNA-005-03F11-8E80	2515	ASO_G0214174_06	AMZ2P1	ENSG00000214174	pseudogene	Targeted lncRNA
104	CNhi10542_ACC	7445237	F6-001-RNA-005-03H10-483E	2515	ASO_G0214174_02	AMZ2P1	ENSG00000214174	pseudogene	Targeted lncRNA
105	CNhi10488_ACC	13236024	F6-001-RNA-003-02D12-2ECE	2458	ASO_G0245571_06	AP001258.4	ENSG00000245571	lncRNA_divergent	Targeted lncRNA
106	CNhi10492_TAC	14934476	F6-001-RNA-003-02C12-DB82	2458	ASO_G0245571_06	AP001258.4	ENSG00000245571	lncRNA_divergent	Targeted lncRNA
107	CNhi10526_ATG	14013011	F6-001-RNA-004-02G02-1238	2514	ASO_G0225439_06	BOLA3-AS1	ENSG00000225439	lncRNA_divergent	Targeted lncRNA
108	CNhi10530_ACC	7249352	F6-001-RNA-004-02H02-F78E	2514	ASO_G0225439_06	BOLA3-AS1	ENSG00000225439	lncRNA_divergent	Targeted lncRNA
109	CNhi10476_AGT	13901468	F6-001-RNA-002-02G09-78ED	2445	ASO_G0215447_01	BX322557.10	ENSG00000215447	lncRNA_divergent	Targeted lncRNA
110	CNhi10470_TAC	13847462	F6-001-RNA-002-02G08-295E	2445	ASO_G0215447_03	BX322557.10	ENSG00000215447	lncRNA_divergent	Targeted lncRNA
111	CNhi10470_ACG	11400379	F6-001-RNA-002-02H08-8E01	2445	ASO_G0215447_03	BX322557.10	ENSG00000215447	lncRNA_divergent	Targeted lncRNA
112	CNhi10469_ACC	15041185	F6-001-RNA-002-02H09-5C5C	2445	ASO_G0215447_01	BX322557.10	ENSG00000215447	lncRNA_divergent	Targeted lncRNA
113	CNhi10639_GCG	5701313	F6-001-RNA-012-04F01-8C02	2601	ASO_G0188070_AD_05	C11orf95	ENSG00000188070	lncRNA_divergent	Targeted lncRNA
114	CNhi10630_CAC	8753239	F6-001-RNA-012-04E01-4146	2601	ASO_G0188070_AD_05	C11orf95	ENSG00000188070	lncRNA_divergent	Targeted lncRNA
115	CNhi10540_ACC	8315458	F6-001-RNA-005-04F11-F687	2515	ASO_C0020443_06	CATG00000016989.1	CATG00000016989	lncRNA_intergenic	Targeted lncRNA
116	CNhi10540_GCG	6569856	F6-001-RNA-005-04H11-2A59	2515	ASO_C0020443_03	CATG00000016989.1	CATG00000016989	lncRNA_intergenic	Targeted lncRNA
117	CNhi10543_AGT	9683585	F6-001-RNA-005-04E11-5E10	2515	ASO_C0020443_06	CATG00000016989.1	CATG00000016989	lncRNA_intergenic	Targeted lncRNA
118	CNhi10536_ACG	8778395	F6-001-RNA-005-04G11-5A01	2515	ASO_C0020443_03	CATG00000016989.1	CATG00000016989	lncRNA_intergenic	Targeted lncRNA
119	CNhi10489_GCG	8918300	F6-001-RNA-003-04G01-1DAC	2458	ASO_C0020672_01	CATG00000017883.1	CATG00000017883	uncertain_coding	Positive Control
120	CNhi10491_ATG	10999138	F6-001-RNA-003-04H01-BC82	2458	ASO_C0020672_01	CATG00000017883.1	CATG00000017883	uncertain_coding	Positive Control
121	CNhi10486_CAC	10055480	F6-001-RNA-003-04H03-8183	2458	ASO_C0020672_07	CATG00000017883.1	CATG00000017883	uncertain_coding	Positive Control
122	CNhi10497_GCG	5617151	F6-001-RNA-003-04G03-17CE	2458	ASO_C0020672_07	CATG00000017883.1	CATG00000017883	uncertain_coding	Positive Control
123	CNhi10488_AGT	11050798	F6-001-RNA-003-04F01-38B4	2458	ASO_C0020672_02	CATG00000017883.1	CATG00000017883	uncertain_coding	Positive Control
124	CNhi10488_TAC	12189355	F6-001-RNA-003-04E01-A2DD	2458	ASO_C0020672_02	CATG00000017883.1	CATG00000017883	uncertain_coding	Positive Control
125	CNhi10524_TAC	13533522	F6-001-RNA-005-02B03-D728	2514	ASO_C0020984_09	CATG00000020700.1	CATG00000020700	lncRNA_intergenic	Targeted lncRNA
126	CNhi10523_AGT	12666752	F6-001-RNA-005-02D02-F0E9	2514	ASO_C0020984_02	CATG00000020700.1	CATG00000020700	lncRNA_intergenic	Targeted lncRNA
127	CNhi10527_ATG	10775127	F6-001-RNA-005-02A03-B393	2514	ASO_C0020984_09	CATG00000020700.1	CATG00000020700	lncRNA_intergenic	Targeted lncRNA
128	CNhi10531_CAC	6566968	F6-001-RNA-005-02C02-88F7	2514	ASO_C0020984_02	CATG00000020700.1	CATG00000020700	lncRNA_intergenic	Targeted lncRNA
129	CNhi10536_GCG	5342129	F6-001-RNA-005-04G01-88B5	2515	ASO_C0008586_03	CATG00000079799.1	CATG00000079799	lncRNA_intergenic	Targeted lncRNA
130	CNhi10543_ACG	8745158	F6-001-RNA-005-04H01-C7D0	2515	ASO_C0008586_03	CATG00000079799.1	CATG00000079799	lncRNA_intergenic	Targeted lncRNA
131	CNhi10476_GCT	13465246	F6-001-RNA-002-02G04-9C48	2445	ASO_G0223811_06	CATG00000089639.1	CATG00000089639	lncRNA_intergenic	Targeted lncRNA
132	CNhi10471_GCG	10689466	F6-001-RNA-002-02G05-9CD0	2445	ASO_G0223811_04	CATG00000089639.1	CATG00000089639	lncRNA_intergenic	Targeted lncRNA
133	CNhi10468_TAC	18503886	F6-001-RNA-002-02H04-20E5	2445	ASO_G0223811_06	CATG00000089639.1	CATG00000089639	lncRNA_intergenic	Targeted lncRNA
134	CNhi10467_GCT	11054604	F6-001-RNA-002-02H05-B723	2445	ASO_G0223811_04	CATG00000089639.1	CATG00000089639	lncRNA_intergenic	Targeted lncRNA
135	CNhi10539_GCG	7464019	F6-001-RNA-005-04G04-7E5A	2515	ASO_C0011140_02	CATG00000090305.1	CATG00000090305	uncertain_coding	Positive Control
136	CNhi10544_ACC	10343671	F6-001-RNA-005-04H04-721C	2515	ASO_C0011140_02	CATG00000090305.1	CATG00000090305	uncertain_coding	Positive Control
137	CNhi10543_ATG	8545988	F6-001-RNA-005-04F04-DD2F	2515	ASO_C0011140_06	CATG00000090305.1	CATG00000090305	uncertain_coding	Positive Control
138	CNhi10539_CAC	8300636	F6-001-RNA-005-04E04-AB6E	2515	ASO_C0011140_06	CATG00000090305.1	CATG00000090305	uncertain_coding	Positive Control
139	CNhi10529_TAC	9829006	F6-001-RNA-005-01G08-F658	2514	ASO_C0012015_07	CATG00000095991.1	CATG00000095991	lncRNA_divergent	Targeted lncRNA
140	CNhi10801_ACC	9128258	F6-001-RNA-018-01B11-8B90	2861	ASO_C0012015_AD_04	CATG00000095991.1	CATG00000095991	lncRNA_divergent	Targeted lncRNA
141	CNhi10524_ACC	15403169	F6-001-RNA-005-01H08-CC58	2514	ASO_C0012015_07	CATG00000095991.1	CATG00000095991	lncRNA_divergent	Targeted lncRNA
142	CNhi10835_CAC	11116564	F6-001-RNA-018-01A12-5A01	2861	ASO_C0012015_AD_05	CATG00000095991.1	CATG00000095991	lncRNA_divergent	Targeted lncRNA
143	CNhi10832_TAC	12294883	F6-001-RNA-018-01A10-858F	2861	ASO_C0012015_AD_02	CATG00000095991.1	CATG00000095991	lncRNA_divergent	Targeted lncRNA
144	CNhi10834_AGT	7166991	F6-001-RNA-018-01A11-958F	2861	ASO_C0012015_AD_04	CATG00000095991.1	CATG00000095991	lncRNA_divergent	Targeted lncRNA
145	CNhi10833_ACG	12610904	F6-001-RNA-018-01B10-298E	2861	ASO_C0012015_AD_02	CATG00000095991.1	CATG00000095991	lncRNA_divergent	Targeted lncRNA
146	CNhi10835_GCT	6182797	F6-001-RNA-018-01B12-ECF3	2861	ASO_C0012015_AD_05	CATG00000095991.1	CATG00000095991	lncRNA_divergent	Targeted lncRNA
147	CNhi10496_ACC	9403033	F6-001-RNA-003-04B02-8F6E	2458	ASO_C0013510_06	CATG00000098831.1	CATG00000098831	lncRNA_antisense	Targeted lncRNA
148	CNhi10488_GCT	10585022	F6-001-RNA-003-04A02-ED4E	2458	ASO_C0013510_06	CATG00000098831.1	CATG00000098831	lncRNA_antisense	Targeted lncRNA
149	CNhi10477_CAC	11959539	F6-001-RNA-002-03B08-D7D2	2445	ASO_C014559_06	CATG00000108369.1	CATG00000108369	lncRNA_divergent	Targeted lncRNA
150	CNhi10477_GCT	12674459	F6-001-RNA-002-03A08-643B	2445	ASO_C014559_06	CATG00000108369.1	CATG00000108369	lncRNA_divergent	Targeted lncRNA
151	CNhi10521_TAC	9997567	F6-001-RNA-004-01G01-88C3	2514	ASO_G0215039_01	CD27-AS1	ENSG00000215039	lncRNA_divergent	Targeted lncRNA
152	CNhi10522_ACG	10307892	F6-001-RNA-004-01H01-9512	2514	ASO_G0215039_01	CD27-AS1	ENSG00000215039	lncRNA_divergent	Targeted lncRNA
153	CNhi10525_ACG	10451041	F6-001-RNA-004-01H08-98BF	2514	ASO_G0223773_06	CD99P1	ENSG00000223773	pseudogene	Targeted lncRNA
154	CNhi10529_CAC	9735855	F6-001-RNA-004-01F08-1D2A	2514	ASO_G0223773_07	CD99P1	ENSG00000223773	pseudogene	Targeted lncRNA
155	CNhi10524_AGT	14029478	F6-001-RNA-004-01G08-BA72	2514	ASO_G0223773_06	CD99P1	ENSG00000223773	pseudogene	Targeted lncRNA
156	CNhi10524_GCT	11958888	F6-001-RNA-004-01F07-991D	2514	ASO_G0223773_05	CD99P1	ENSG00000223773	pseudogene	Targeted lncRNA
157	CNhi10532_TAC	10106541	F6-001-RNA-004-01E08-98E5	2514	ASO_G0223773_07	CD99P1	ENSG00000223773	pseudogene	Targeted lncRNA
158	CNhi10522_AGT	12941202	F6-001-RNA-004-01E07-2ADD	2514	ASO_G0223773_05	CD99P1	ENSG00000223773	pseudogene	Targeted lncRNA
159	CNhi10817_ACC	11197304	F6-001-RNA-020-01G02-A258	2866	ASO_G0240498_POS_04	CDKN2B-AS1	ENSG00000240498	lncRNA_divergent	Positive Control
160	CNhi10818_ATG	11503643	F6-001-RNA-020-01H02-E2B9	2866	ASO_G0240498_POS_04	CDKN2B-AS1	ENSG00000240498	lncRNA_divergent	Positive Control
161	CNhi10812_ATG	10980717	F6-001-RNA-020-01E01-7988	2866	ASO_G0240498_POS_01	CDKN2B-AS1	ENSG00000240498	lncRNA_divergent	Positive Control
162	CNhi10814_GCG	5988810	F6-001-RNA-020-01F01-D064	2866	ASO_G0240498_POS_01	CDKN2B-AS1	ENSG00000240498	lncRNA_divergent	Positive Control
163	CNhi10523_ACG	10399167	F6-001-RNA-005-01B01-AFA2	2514	ASO_C0000830_02	CDKN2C	ENSG00000123080	coding_mRNA	Positive Control
164	CNhi10521_GCT	11961131	F6-001-RNA-005-01A03-3210	2514	ASO_C0000830_08	CDKN2C	ENSG00000123080	coding_mRNA	Positive Control
165	CNhi10527_ACC	12326197	F6-001-RNA-005-01B03-4DAC	2514	ASO_C0000830_08	CDKN2C	ENSG00000123080	coding_mRNA	Positive Control
166	CNhi10527_GCT	11782238	F6-001-RNA-005-01A01-DCD9	2514	ASO_C0000830_02	CDKN2C	ENSG00000123080	coding_mRNA	Positive Control
167	CNhi10603_ATG	8265424	F6-001-RNA-010-04F11-3DDA	2577	ASO_G0247572_08	CKMT2-AS1	ENSG00000247572	lncRNA_divergent	Targeted lncRNA
168	CNhi10604_CAC	7352266	F6-001-RNA-010-04E11-993B	2577	ASO_G0247572_08	CKMT2-AS1	ENSG00000247572	lncRNA_divergent	Targeted lncRNA
169	CNhi10606_AGT	10087714	F6-001-RNA-010-04G12-0565	2577	ASO_G0247572_09	CKMT2-AS1	ENSG00000247572	lncRNA_divergent	Targeted lncRNA
170	CNhi10605_AGT	13416763	F6-001-RNA-010-04H12-2371	2577	ASO_G0247572_09	CKMT2-AS1	ENSG00000247572	lncRNA_divergent	Targeted lncRNA
171	CNhi10544_ATG	8837500	F6-001-RNA-005-04A02-F353	2515	ASO_C0008202_04	CLDN22	ENSG00000177300	coding_mRNA	Positive Control
172	CNhi10540_GCT	10041549	F6-001-RNA-005-04D02-6D5E	2515	ASO_C0008202_02	CLDN22	ENSG00000177300	coding_mRNA	Positive Control
173	CNhi10539_TAC	11749504	F6-001-RNA-005-04C02-3FD1	2515	ASO_C0008202_02	CLDN22	ENSG00000177300	coding_mRNA	Positive Control
174	CNhi10535_GCG	8991277	F6-001-RNA-005-04B02-D078	2515	ASO_C0008202_04	CLDN22	ENSG00000177300	coding_mRNA	Positive Control
175	CNhi10543_TAC	10068425	F6-001-RNA-005-04B01-08BE	2515	ASO_C0008202_01	CLDN22	ENSG00000177300	coding_mRNA	Positive Control
176	CNhi10540_ATG	10301514	F6-001-RNA-005-04A01-FF20	2515	ASO_C0008202_01	CLDN22	ENSG00000177300	coding_mRNA	Positive Control
177	CNhi10611_AGT	8731948	F6-001-RNA-010-02H12-16D6	2577	ASO_G0244625_09	CTA-211A9.5	ENSG00000244625	lncRNA_intergenic	Targeted lncRNA
178	CNhi10789_GCG	11535531	F6-001-RNA-015-02G08-E7B3	2860	ASO_G0244625_AD_09	CTA-211A9.5	ENSG00000244625	lncRNA_intergenic	Targeted lncRNA
179	CNhi10612_TAC	9240963	F6-001-RNA-010-02G12-F1F4	2577	ASO_G0244625_09	CTA-211A9.5	ENSG00000244625	lncRNA_intergenic	Targeted lncRNA
180	CNhi10788_ACC	21498142	F6-001-RNA-015-02F09-425E	2860	ASO_G0244625_AD_08	CTA-211A9.5	ENSG00000244625	lncRNA_intergenic	Targeted lncRNA
181	CNhi10791_GCG	9670877	F6-001-RNA-015-02H08-56F3	2860	ASO_G0244625_AD_09	CTA-211A9.5	ENSG00000244625	lncRNA_intergenic	Targeted lncRNA
182	CNhi10611_ACG	8893833	F6-001-RNA-010-02E10-A756	2577	ASO_G0244625_04	CTA-211A9.5	ENSG00000244625	lncRNA_intergenic	Targeted lncRNA
183	CNhi10785_ATG	17195349	F6-001-RNA-015-02E09-BF1A	2860	ASO_G0244625_AD_08	CTA-211A9.5	ENSG00000244625	lncRNA_intergenic	Targeted lncRNA
184	CNhi10607_CAC	10128142	F6-001-RNA-010-02F10-592E	2577	ASO_G0244625_04	CTA-211A9.5	ENSG00000244625	lncRNA_intergenic	Targeted lncRNA
185	CNhi10830_TAC	16719562	F6-001-RNA-019-03F09-D6CC	2861	ASO_G0245937_AD_05	CTC-228N24.3	ENSG00000245937	lncRNA_divergent	Targeted lncRNA
186	CNhi10609_ACC	9543758	F6-001-RNA-010-03B01-8885	2577	ASO_G0245937_01	CTC-228N24.3	ENSG00000245937	lncRNA_divergent	Targeted lncRNA
187	CNhi10612_ACG	8602016	F6-001-RNA-010-03A01-8D9B	2577	ASO_G0245937_01	CTC-228N24.3	ENSG00000245937	lncRNA_divergent	Targeted lncRNA
188	CNhi10834_CAC	12240267	F6-001-RNA-019-03F07-7671	2861	ASO_G0245937_AD_02	CTC-228N24.3	ENSG00000245937	lncRNA_divergent	Targeted lncRNA
189	CNhi10831_GCT	8892747	F6-001-RNA-019-03E09-F0AE	2861	ASO_G0245937_AD_05	CTC-228N24.3	ENSG00000245937	lncRNA_divergent	Targeted lncRNA
190	CNhi10830_GCG	6777173	F6-001-RNA-019-03E07-27B5	2861	ASO_G0245937_AD_02	CTC-228N24.3	ENSG00000245937	lncRNA_divergent	Targeted lncRNA
191	CNhi10542_ATG	7229424	F6-001-RNA-006-02D06-B031	2515	ASO_G0233937_05	CTC-338M12.4	ENSG00000233937	lncRNA_divergent	Targeted lncRNA
192	CNhi10537_ACC	9500988	F6-001-RNA-006-02C06-FA09	2515	ASO_G0233937_05	CTC-338M12.4	ENSG00000233937	lncRNA_divergent	Targeted lncRNA
193	CNhi10587_ACC	12341742	F6-001-RNA-009-03G07-524E	2562	ASO_G0267419_02	CTC-559E9.6	ENSG00000267419	lncRNA_divergent	Failed QC
194	CNhi10787_GCG	7784371	F6-001-RNA-016-04E02-013C	2860	ASO_G0267419_AD_04	CTC-559E9.6	ENSG00000267419	lncRNA_divergent	Targeted lncRNA
195	CNhi10792_ACC	8353341	F6-001-RNA-016-04H02-0C89	2860	ASO_G0267419_AD_06	CTC-559E9.6	ENSG00000267419	lncRNA_divergent	Targeted lncRNA
196	CNhi10783_TAC	14652725	F6-001-RNA-016-04G02-D4DB	2860	ASO_G0267419_AD_06	CTC-559E9.6	ENSG00000267419	lncRNA_divergent	Targeted lncRNA
197	CNhi10587_CAC	7871894	F6-001-RNA-009-03H07-21AA	2562	ASO_G0267419_02	CTC-559E9.6	ENSG00000267419	lncRNA_divergent	Failed QC
198	CNhi10783_ATG	14600022	F6-001-RNA-016-04F02-A2B9	2860	ASO_G0267419_AD_04	CTC-559E9.6	ENSG00000267419	lncRNA_divergent	Targeted lncRNA
199	CNhi10791_CAC	10599172	F6-001-RNA-015-01B09-9E4B	2860	ASO_G0219665_AD_04	CTD-2006C1.2	ENSG00000219665	lncRNA_intergenic	Targeted lncRNA
200	CNhi10786_GCT	9802571	F6-001-RNA-015-01D09-F66D	2860	ASO_G0219665_AD_08	CTD-2006C1.2	ENSG00000219665	lncRNA_intergenic	Targeted lncRNA
201	CNhi10529_GCT	9546198	F6-001-RNA-004-01G06-7DC3	2514	ASO_G0219665_08	CTD-2006C1.2	ENSG00000219665	lncRNA_intergenic	Targeted lncRNA
202	CNhi10784_TAC	14842752	F6-001-RNA-015-01C09-499D	2860	ASO_G0219665_AD_08	CTD-2006C1.2	ENSG00000219665	lncRNA_intergenic	Targeted lncRNA
203	CNhi10788_GCT	7924007	F6-001-RNA-015-01A09-D228	2860	ASO_G0219665_AD_04	CTD-2006C1.2	ENSG00000219665	lncRNA_intergenic	Targeted lncRNA
204	CNhi10522_ATG	4452157	F6-001-RNA-004-01H06-181D	2514	ASO_G0219665_08	CTD-2006C1.2	ENSG00000219665	lncRNA_intergenic	Targeted lncRNA
205	CNhi10586_GCT	10367588	F6-001-RNA-009-03B06-BE4F	2562	ASO_G0267254_07	CTD-2162K18.5	ENSG00000267254	lncRNA_sense_intronic	Failed QC
206	CNhi10586_ACG	12332991	F6-001-RNA-009-03A06-1891	2562	ASO_G0267254_07	CTD-2162K18.5	ENSG00000267254	lncRNA_sense_intronic	Failed QC
207	CNhi10586_ATG	8555069	F6-001-RNA-009-03E01-90F4	2562	ASO_G0267248_02	CTD-2319I12.4	ENSG00000267248	lncRNA_intergenic	Failed QC
208	CNhi10786_AGT	9643563	F6-001-RNA-016-04D08-C028	2860	ASO_G0267248_AD_07	CTD-2319I12.4	ENSG00000267248	lncRNA_intergenic	Targeted lncRNA
209	CNhi10789_AGT	9907115	F6-001-RNA-016-04C08-9478	2860	ASO_G0267248_AD_07	CTD-2319I12.4	ENSG00000267248	lncRNA_intergenic	Targeted lncRNA
210	CNhi10586_TAC	9475101	F6-001-RNA-009-03F01-33C1	2562	ASO_G0267248_02	CTD-2319I12.4	ENSG00000267248	lncRNA_intergenic	Failed QC
211	CNhi10790_AGT	7252904	F6-001-RNA-016-04B08-584E	2860	ASO_G0267248_AD_03	CTD-2319I12.4	ENSG00000267248	lncRNA_intergenic	Targeted lncRNA
212	CNhi10790_CAC	13087078	F6-001-RNA-016-04A08-8B37	2860	ASO_G0267248_AD_03	CTD-2319I12.4	ENSG00000267248	lncRNA_intergenic	Targeted lncRNA
213	CNhi10832_ATG	15074063	F6-001-RNA-019-04F07-8465	2861	ASO_G0253982_AD_01	CTD-2336O2.1	ENSG00000253982	lncRNA_divergent	Targeted lncRNA
214	CNhi10805_GCT	6214849	F6-001-RNA-019-04E07-F4F0	2861	ASO_G0253982_AD_01	CTD-2336O2.1	ENSG00000253982	lncRNA_divergent	Targeted lncRNA
215	CNhi10487_ACC	11242618	F6-001-RNA-003-03F07-416D	2458	ASO_G0267577_03	CTD-2587H24.5	ENSG00000267577	lncRNA_divergent	Targeted lncRNA
216	CNhi10491_ACC	8563076	F6-001-RNA-003-03G07-216C	2458	ASO_G0267577_01	CTD-2587H24.5	ENSG00000267577	lncRNA_divergent	Targeted lncRNA
217	CNhi10495_ACG	8809401	F6-001-RNA-003-03E07-93DC	2458	ASO_G0267577_03	CTD-2587H24.5	ENSG00000267577	lncRNA_divergent	Targeted lncRNA
218	CNhi10492_GCT	11522050	F6-001-RNA-003-03H07-75B7	2458	ASO_G0267577_01	CTD-2587H24.5	ENSG00000267577	lncRNA_divergent	Targeted lncRNA
219	CNhi10765_GCT	10801480	F6-001-RNA-014-04E05-C6AF	2817	ASO_G0259520_AD_04	CTD-2651B20.3	ENSG00000259520	lncRNA_divergent	Targeted lncRNA
220	CNhi10762_ATG	17098054	F6-001-RNA-014-04G05-94E8	2817	ASO_G0259520_AD_08	CTD-2651B20.3	ENSG00000259520	lncRNA_divergent	Targeted lncRNA
221	CNhi10766_ACG	11634538	F6-001-RNA-014-04F05-F039	2817	ASO_G0259520_AD_04	CTD-2651B20.3	ENSG00000259520	lncRNA_divergent	Targeted lncRNA
222	CNhi10759_AGT	11277710	F6-001-RNA-014-04H05-424E	2817	ASO_G0259520_AD_08	CTD-2651B20.3	ENSG00000259520	lncRNA_divergent	Targeted lncRNA
223	CNhi10782_ACG	13549572	F6-001-RNA-017-05F02-16D3	2860	ASO_G0269834_AD_06	CTD-3018O17.3	ENSG00000269834	lncRNA_divergent	Targeted lncRNA
224	CNhi10793_ACC	12300204	F6-001-RNA-017-05A12-7660	2860	ASO_G0269834_AD_02	CTD-3018O17.3	ENSG00000269834	lncRNA_divergent	Targeted lncRNA
225	CNhi10785_ACC	13031972	F6-001-RNA-017-05B12-E2DE	2860	ASO_G0269834_AD_02	CTD-3018O17.3	ENSG00000269834	lncRNA_divergent	Targeted lncRNA
226	CNhi10782_TAC	19237499	F6-001-RNA-017-05E02-53A0	2860	ASO_G0269834_AD_06	CTD-3018O17.3	ENSG00000269834	lncRNA_divergent	Targeted lncRNA
227	CNhi10606_ACC	7294796	F6-001-RNA-010-01F04-99B3	2577	ASO_G0269834_02	CTD-3018O17.3	ENSG00000269834	lncRNA_divergent	Targeted lncRNA
228	CNhi10602_ATG	7544353	F6-001-RNA-010-01E04-44DB	2577	ASO_G0269834_02	CTD-3018O17.3	ENSG00000269834	lncRNA_divergent	Targeted lncRNA
229	CNhi10473_GCG	9074770	F6-001-RNA-002-01A01-30CD	2445	ASO_G0269439_09	CTD-3131K8.2	ENSG00000269439	lncRNA_divergent	Targeted lncRNA
230	CNhi10469_ACG	13076458	F6-001-RNA-002-01B01-C30F	2445	ASO_G0269439_09	CTD-3131K8.2	ENSG00000269439	lncRNA_divergent	Targeted lncRNA
231	CNhi10456_CAC	12541778	F6-001-RNA-001-04F07-9792	2415	ASO_G0226950_02	DANCR	ENSG00000226950	lncRNA_intergenic	Targeted lncRNA
232	CNhi10757_CAC	11448854	F6-001-RNA-013-01E12-7B60	2817	ASO_G0226950_04	DANCR	ENSG00000226950	lncRNA_intergenic	Targeted lncRNA
233	CNhi10764_ACC	14955233	F6-001-RNA-014-03F12-E403	2817	ASO_G0226950_04	DANCR	ENSG00000226950	lncRNA_intergenic	Targeted lncRNA
234	CNhi10761_GCG	8960820	F6-001-RNA-013-01F12-336D	2817	ASO_G0226950_04	DANCR	ENSG00000226950	lncRNA_intergenic	Targeted lncRNA
235	CNhi10457_GCG	8945754	F6-001-RNA-001-02H09-7C64	2415	ASO_G0226950_05	DANCR	ENSG00000226950	lncRNA_intergenic	Targeted lncRNA
236	CNhi10790_ATG	12623572	F6-001-RNA-016-03E12-9FE6	2860	ASO_G0226950_04	DANCR	ENSG00000226950	lncRNA_intergenic	Targeted lncRNA
237	CNhi10461_GCT	14108633	F6-001-RNA-001-04F08-42DD	2415	ASO_G0226950_04	DANCR	ENSG00000226950	lncRNA_intergenic	Targeted lncRNA
238	CNhi10767_ACC	12483169	F6-001-RNA-014-03E12-389B	2817	ASO_G0226950_04	DANCR	ENSG00000226950	lncRNA_intergenic	Targeted lncRNA
239	CNhi10633_ACG	8496909	F6-001-RNA-012-04E08-414A	2601	ASO_G0226950_AD_07	DANCR	ENSG00000226950	lncRNA_intergenic	Targeted lncRNA
240	CNhi10832_CAC	6431422	F6-001-RNA-018-01F12-BAC2	2861	ASO_G0226950_04	DANCR	ENSG00000226950	lncRNA_intergenic	Targeted lncRNA
241	CNhi10833_CAC	10527266	F6-001-RNA-019-03E12-6A33	2861	ASO_G0226950_04	DANCR	ENSG00000226950	lncRNA_intergenic	Targeted lncRNA
242	CNhi10457_ACG	13153810	F6-001-RNA-001-02F08-7D93	2415	ASO_G0226950_04	DANCR	ENSG00000226950	lncRNA_intergenic	Targeted lncRNA
243	CNhi10461_ATG	12001185	F6-001-RNA-001-02F07-9D21	2415	ASO_G0226950_02	DANCR	ENSG00000226950	lncRNA_intergenic	Targeted lncRNA
244	CNhi10792_CAC	10734535	F6-001-RNA-015-01E12-7686	2860	ASO_G0226950_04	DANCR	ENSG00000226950	lncRNA_intergenic	Targeted lncRNA
245	CNhi10834_ACG	11264497	F6-001-RNA-019-03F12-6567	2861	ASO_G0226950_04	DANCR	ENSG00000226950	lncRNA_intergenic	Targeted lncRNA
246	CNhi10463_ATG	12187982	F6-001-RNA-001-04H09-C7D4	2415	ASO_G0226950_05	DANCR	ENSG00000226950	lncRNA_intergenic	Targeted lncRNA
247	CNhi10801_ATG	8717778	F6-001-RNA-018-01E12-158E	2861	ASO_G0226950_04	DANCR	ENSG00000226950	lncRNA_intergenic	Targeted lncRNA
248	CNhi10790_TAC	11817170	F6-001-RNA-016-03F12-D83C	2860	ASO_G0226950_04	DANCR	ENSG00000226950	lncRNA_intergenic	Targeted lncRNA
249	CNhi10790_GCG	6248670	F6-001-RNA-015-01F12-6A0C	2860	ASO_G0226950_04	DANCR	ENSG00000226950	lncRNA_intergenic	Targeted lncRNA
250	CNhi10629_TAC	8894006	F6-001-RNA-012-04F08-385F	2601	ASO_G0226950_AD_07	DANCR	ENSG00000226950	lncRNA_intergenic	Targeted lncRNA
251	CNhi10785_GCT	9858598	F6-001-RNA-015-01F03-A605	2860	ASO_G0224165_AD_07	DNAJC27-AS1	ENSG00000224165	lncRNA_divergent	Targeted lncRNA
252	CNhi10523_GCT	11699975	F6-001-RNA-004-01B12-E299	2514	ASO_G0224165_10	DNAJC27-AS1	ENSG00000224165	lncRNA_divergent	Targeted lncRNA
253	CNhi10521_CAC	11229898	F6-001-RNA-004-01A12-A0BA	2514	ASO_G0224165_10	DNAJC27-AS1	ENSG00000224165	lncRNA_divergent	Targeted lncRNA
254	CNhi10783_GCT	11096232	F6-001-RNA-015-01E03-584A	2860	ASO_G0224165_AD_07	DNAJC27-AS1	ENSG00000224165	lncRNA_divergent	Targeted lncRNA
255	CNhi10634_GCT	7890903	F6-001-RNA-012-02B03-1EEA	2601	ASO_G0230630_AD_10	DNM3OS	ENSG00000230630	lncRNA_antisense	Targeted lncRNA
256	CNhi10637_ACC	8585269	F6-001-RNA-012-02B02-8100	2601	ASO_G0230630_AD_04	DNM3OS	ENSG00000230630	lncRNA_antisense	Targeted lncRNA
257	CNhi10631_ACG	8266894	F6-001-RNA-012-02A03-3A22	2601	ASO_G0230630_AD_10	DNM3OS	ENSG00000230630	lncRNA_antisense	Targeted lncRNA
258	CNhi10640_ACG	8919255	F6-001-RNA-012-02A02-F6DF	2601	ASO_G0230630_AD_04	DNM3OS	ENSG00000230630	lncRNA_antisense	Targeted lncRNA
259	CNhi10817_CAC	13504630	F6-001-RNA-020-01D05-AD2E	2866	ASO_G0134153_POS_05	EMC7	ENSG00000134153	coding_mRNA	Positive Control
260	CNhi10815_ACG	12540801	F6-001-RNA-020-01C05-A50A	2866	ASO_G0134153_POS_05	EMC7	ENSG00000134153	coding_mRNA	Positive Control
261	CNhi10815_AGT	11137384	F6-001-RNA-020-01D06-43DA	2866	ASO_G0134153_POS_07	EMC7	ENSG00000134153	coding_mRNA	Positive Control
262	CNhi10813_TAC	14017171	F6-001-RNA-020-01C06-4548	2866	ASO_G0134153_POS_07	EMC7	ENSG00000134153	coding_mRNA	Positive Control
263	CNhi10634_ATG	10796621	F6-001-RNA-012-04B11-63C1	2601	ASO_G0229847_AD_04	EMX2OS	ENSG00000229847	lncRNA_divergent	Targeted lncRNA
264	CNhi10454_TAC	18583213	F6-001-RNA-001-04B10-C32E	2415	ASO_G0229847_01	EMX2OS	ENSG00000229847	lncRNA_divergent	Targeted lncRNA
265	CNhi10640_ACC	9371812	F6-001-RNA-012-04A11-5B36	2601	ASO_G0229847_AD_04	EMX2OS	ENSG00000229847	lncRNA_divergent	Targeted lncRNA
266	CNhi10460_GCG	8450100	F6-001-RNA-001-02B10-90FA	2415	ASO_G0229847_01	EMX2OS	ENSG00000229847	lncRNA_divergent	Targeted lncRNA
267	CNhi10636_AGT	6615288	F6-001-RNA-012-04A10-7C75	2601	ASO_G0229847_AD_02	EMX2OS	ENSG00000229847	lncRNA_divergent	Targeted lncRNA
268	CNhi10461_CAC	8875979	F6-001-RNA-001-02B11-F2FB	2415	ASO_G0229847_03	EMX2OS	ENSG00000229847	lncRNA_divergent	Targeted lncRNA
269	CNhi10455_AGT	15203146	F6-001-RNA-001-04B11-05E0	2415	ASO_G0229847_03	EMX2OS	ENSG00000229847	lncRNA_divergent	Targeted lncRNA
270	CNhi10636_ATG	12937144	F6-001-RNA-012-04B10-C5B7	2601	ASO_G0229847_AD_02	EMX2OS	ENSG00000229847	lncRNA_divergent	Targeted lncRNA
271	CNhi10632_ACG	8318650	F6-001-RNA-012-03A09-B462	2601	ASO_G0260565_AD_08	ERVK13-1	ENSG00000260565	lncRNA_intergenic	Targeted lncRNA
272	CNhi10640_GCT	7868558	F6-001-RNA-012-03B09-68E3	2601	ASO_G0260565_AD_08	ERVK13-1	ENSG00000260565	lncRNA_intergenic	Targeted lncRNA
273	CNhi10630_ATG	12624492	F6-001-RNA-012-03A08-DE95	2601	ASO_G0260565_AD_06	ERVK13-1	ENSG00000260565	lncRNA_intergenic	Targeted lncRNA
274	CNhi10634_ACC	9550024	F6-001-RNA-012-03B08-743F	2601	ASO_G0260565_AD_06	ERVK13-1	ENSG00000260565	lncRNA_intergenic	Targeted lncRNA
275	CNhi10633_GCT	10715755	F6-001-RNA-012-01A01-295C	2601	ASO_G0142396_AD_01	ERVK3-1	ENSG00000142396	lncRNA_sense_intronic	Targeted lncRNA
276	CNhi10638_AGT	9435154	F6-001-RNA-012-01C03-50B3	2601	ASO_G0142396_AD_07	ERVK3-1	ENSG00000142396	lncRNA_sense_intronic	Targeted lncRNA
277	CNhi10637_ACG	12445087	F6-001-RNA-012-01B01-559F	2601	ASO_G0142396_AD_01	ERVK3-1	ENSG00000142396	lncRNA_sense_intronic	Targeted lncRNA
278	CNhi10635_GCG	9314231	F6-001-RNA-012-01D03-C912	2601	ASO_G0142396_AD_07	ERVK3-1	ENSG00000142396	lncRNA_sense_intronic	Targeted lncRNA
279	CNhi10486_AGT	12384807	F6-001-RNA-003-03C08-F7C5	2458	ASO_G0260852_02	FBXL19-AS1	ENSG00000260852	lncRNA_divergent	Targeted lncRNA
280	CNhi10494_ACG	11075545	F6-001-RNA-003-03D08-A788	2458	ASO_G0260852_02	FBXL19-AS1	ENSG00000260852	lncRNA_divergent	Targeted lncRNA
281	CNhi10633_ACC	14793691	F6-001-RNA-012-04B08-ED30	2601	ASO_G0225733_AD_06	FGD5-AS1	ENSG00000225733	lncRNA_divergent	Targeted lncRNA
282	CNhi10638_ATG	6499927	F6-001-RNA-012-04B07-DD88	2601	ASO_G0225733_AD_03	FGD5-AS1	ENSG00000225733	lncRNA_divergent	Targeted lncRNA
283	CNhi10463_TAC	14199058	F6-001-RNA-001-04D09-514B	2415	ASO_G0225733_04	FGD5-AS1	ENSG00000225733	lncRNA_divergent	Targeted lncRNA
284	CNhi10459_ATG	15395041	F6-001-RNA-001-02B08-A410	2415	ASO_G0225733_03	FGD5-AS1	ENSG00000225733	lncRNA_divergent	Targeted lncRNA
285	CNhi10463_ACG	12492916	F6-001-RNA-001-04B08-E67E	2415	ASO_G0225733_03	FGD5-AS1	ENSG00000225733	lncRNA_divergent	Targeted lncRNA
286	CNhi10631_AGT	7351528	F6-001-RNA-012-04A08-0897	2601	ASO_G0225733_AD_06	FGD5-AS1	ENSG00000225733	lncRNA_divergent	Targeted lncRNA
287	CNhi10455_ACC	11008940	F6-001-RNA-001-02D09-4EF8	2415	ASO_G0225733_04	FGD5-AS1	ENSG00000225733	lncRNA_divergent	Targeted lncRNA
288	CNhi10638_ACG	8396988	F6-001-RNA-012-04A07-82ED	2601	ASO_G0225733_AD_03	FGD5-AS1	ENSG00000225733	lncRNA_divergent	Targeted lncRNA
289	CNhi10534_AGT	8931579	F6-001-RNA-005-03B04-8DC9	2515	ASO_G0198468_01	FLVCR1-AS1	ENSG00000198468	lncRNA_divergent	Targeted lncRNA
290	CNhi10536_AGT	7506590	F6-001-RNA-005-03C05-C9B1	2515	ASO_G0198468_03	FLVCR1-AS1	ENSG00000198468	lncRNA_divergent	Targeted lncRNA
291	CNhi10544_TAC	10196906	F6-001-RNA-005-03C06-2B23	2515	ASO_G0198468_07	FLVCR1-AS1	ENSG00000198468	lncRNA_divergent	Targeted lncRNA
292	CNhi10541_CAC	11730405	F6-001-RNA-005-03D06-4691	2515	ASO_G0198468_07	FLVCR1-AS1	ENSG00000198468	lncRNA_divergent	Targeted lncRNA
293	CNhi10536_GCT	13079912	F6-001-RNA-005-03A04-8EED	2515	ASO_G0198468_01	FLVCR1-AS1	ENSG00000198468	lncRNA_divergent	Targeted lncRNA
294	CNhi10537_ACG	10041012	F6-001-RNA-005-03D05-67EF	2515	ASO_G0198468_03	FLVCR1-AS1	ENSG00000198468	lncRNA_divergent	Targeted lncRNA
295	CNhi10815_ACC	10390525	F6-001-RNA-017-05B08-215F	2866	ASO_G0258920_AD_07	FOXN3-AS1	ENSG00000258920	lncRNA_divergent	Targeted lncRNA
296	CNhi10817_GCG	8054871	F6-001-RNA-017-05A08-BBD9	2866	ASO_G0258920_AD_07	FOXN3-AS1	ENSG00000258920	lncRNA_divergent	Targeted lncRNA
297	CNhi10581_ACG	6496255	F6-001-RNA-009-01A01-04A3	2562	ASO_G0258920_01	FOXN3-AS1	ENSG00000258920	lncRNA_divergent	Failed QC
298	CNhi10581_TAC	9216153	F6-001-RNA-009-01B01-0A9C	2562	ASO_G0258920_01	FOXN3-AS1	ENSG00000258920	lncRNA_divergent	Failed QC
299	CNhi10456_ATG	18927034	F6-001-RNA-001-02H12-78C4	2415	ASO_G0230590_06	FTX	ENSG00000230590	lncRNA_intergenic	Targeted lncRNA
300	CNhi10462_AGT	14097430	F6-001-RNA-001-04F11-06A1	2415	ASO_G0230590_05	FTX	ENSG00000230590	lncRNA_intergenic	Targeted lncRNA
301	CNhi10632_AGT	10752023	F6-001-RNA-012-04E10-5B6A	2601	ASO_G0230590_AD_03	FTX	ENSG00000230590	lncRNA_intergenic	Targeted lncRNA
302	CNhi10456_GCG	14444287	F6-001-RNA-001-02F11-7310	2415	ASO_G0230590_05	FTX	ENSG00000230590	lncRNA_intergenic	Targeted lncRNA
303	CNhi10633_TAC	7720776	F6-001-RNA-012-04F10-0697	2601	ASO_G0230590_AD_03	FTX	ENSG00000230590	lncRNA_intergenic	Targeted lncRNA
304	CNhi10636_TAC	9168912	F6-001-RNA-012-04H10-E086	2601	ASO_G0230590_AD_02	FTX	ENSG00000230590	lncRNA_intergenic	Targeted lncRNA
305	CNhi10455_CAC	8932426	F6-001-RNA-001-02F10-51DD	2415	ASO_G0230590_02	FTX	ENSG00000230590	lncRNA_intergenic	Targeted lncRNA
306	CNhi10640_AGT	6761357	F6-001-RNA-012-04G10-E074	2601	ASO_G0230590_AD_02	FTX	ENSG00000230590	lncRNA_intergenic	Targeted lncRNA
307	CNhi10817_AGT	7488903	F6-001-RNA-021-03D12-0C8F	2866	ASO_G0228630_POS_07	HOTAIR	ENSG00000228630	lncRNA_intergenic	Positive Control
308	CNhi10810_ACG	13906021	F6-001-RNA-021-03C12-7DB7	2866	ASO_G0228630_POS_07	HOTAIR	ENSG00000228630	lncRNA_intergenic	Positive Control
309	CNhi10818_ACG	9707235	F6-001-RNA-021-03C11-8617	2866	ASO_G0228630_POS_06	HOTAIR	ENSG00000228630	lncRNA_intergenic	Positive Control
310	CNhi10810_TAC	15419701	F6-001-RNA-021-03D11-DB09	2866	ASO_G0228630_POS_06	HOTAIR	ENSG00000228630	lncRNA_intergenic	Positive Control
311	CNhi10522_TAC	12774208	F6-001-RNA-004-02B06-6DFA	2514	ASO_G0225470_05	JPX	ENSG00000225470	lncRNA_intergenic	Targeted lncRNA
312	CNhi10835_AGT	6991557	F6-001-RNA-021-02B11-7BD3	2861	ASO_G0225470_AD_04	JPX	ENSG00000225470	lncRNA_intergenic	Targeted lncRNA
313	CNhi10522_CAC	11466786	F6-001-RNA-004-02A06-C6A8	2514	ASO_G0225470_05	JPX	ENSG00000225470	lncRNA_intergenic	Targeted lncRNA
314	CNhi10830_ATG	10633633	F6-001-RNA-021-02A11-EA83	2861	ASO_G0225470_AD_04	JPX	ENSG00000225470	lncRNA_intergenic	Targeted lncRNA
315	CNhi10534_ACG	8654161	F6-001-RNA-005-03H01-BE26	2515	ASO_G0186615_03	KTN1-AS1	ENSG00000186615	lncRNA_divergent	Targeted lncRNA
316	CNhi10534_ATG	6060559	F6-001-RNA-005-03F01-3F6E	2515	ASO_G0186615_04	KTN1-AS1	ENSG00000186615	lncRNA_divergent	Targeted lncRNA
317	CNhi10541_GCT	9029474	F6-001-RNA-005-03E01-55CE	2515	ASO_G0186615_04	KTN1-AS1	ENSG00000186615	lncRNA_divergent	Targeted lncRNA
318	CNhi10533_TAC	7319116	F6-001-RNA-005-03G01-2DCD	2515	ASO_G0186615_03	KTN1-AS1	ENSG00000186615	lncRNA_divergent	Targeted lncRNA
319	CNhi10544_AGT	8310803	F6-001-RNA-005-03F02-E855	2515	ASO_G0186615_09	KTN1-AS1	ENSG00000186615	lncRNA_divergent	Targeted lncRNA
320	CNhi10540_AGT	9917155	F6-001-RNA-005-03E02-6B45	2515	ASO_G0186615_09	KTN1-AS1	ENSG00000186615	lncRNA_divergent	Targeted lncRNA
321	CNhi10578_ACC	7941497	F6-001-RNA-006-03D08-797A	2562	ASO_G0235823_03	LINC00263	ENSG00000235823	lncRNA_intergenic	Failed QC
322	CNhi10578_CAC	8444428	F6-001-RNA-006-03C08-4B62	2562	ASO_G0235823_03	LINC00263	ENSG00000235823	lncRNA_intergenic	Failed QC
323	CNhi10633_GCG	8258468	F6-001-RNA-012-01H05-E74A	2601	ASO_G0218510_AD_06	LINC00339	ENSG00000218510	lncRNA_intergenic	Targeted lncRNA
324	CNhi10630_GCT	9376688	F6-001-RNA-012-01G05-BE7F	2601	ASO_G0218510_AD_06	LINC00339	ENSG00000218510	lncRNA_intergenic	Targeted lncRNA
325	CNhi10629_ACC	13060773	F6-001-RNA-012-01G04-97AD	2601	ASO_G0218510_AD_03	LINC00339	ENSG00000218510	lncRNA_intergenic	Targeted lncRNA
326	CNhi10639_CAC	8880366	F6-001-RNA-012-01H04-EDE0	2601	ASO_G0218510_AD_03	LINC00339	ENSG00000218510	lncRNA_intergenic	Targeted lncRNA
327	CNhi10453_GCG	10843348	F6-001-RNA-001-01E05-9AB4	2415	ASO_G0218510_04	LINC00339	ENSG00000218510	lncRNA_intergenic	Targeted lncRNA
328	CNhi10462_CAC	7909921	F6-001-RNA-001-03E05-DF01	2415	ASO_G0218510_04	LINC00339	ENSG00000218510	lncRNA_intergenic	Targeted lncRNA
329	CNhi10523_GCG	10456416	F6-001-RNA-004-03F02-236C	2514	ASO_G0227036_04	LINC00511	ENSG00000227036	lncRNA_intergenic	Targeted lncRNA
330	CNhi10532_ATG	7556056	F6-001-RNA-004-03E02-970F	2514	ASO_G0227036_04	LINC00511	ENSG00000227036	lncRNA_intergenic	Targeted lncRNA
331	CNhi10792_GCT	10069656	F6-001-RNA-015-02C02-616C	2860	ASO_G0227036_AD_07	LINC00511	ENSG00000227036	lncRNA_intergenic	Targeted lncRNA
332	CNhi10788_TAC	13094615	F6-001-RNA-015-02D02-DAD3	2860	ASO_G0227036_AD_07	LINC00511	ENSG00000227036	lncRNA_intergenic	Targeted lncRNA
333	CNhi10766_GCT	10365752	F6-001-RNA-014-04D12-E4EA	2817	ASO_G0259091_AD_10	LINC00517	ENSG00000259091	lncRNA_antisense	Targeted lncRNA
334	CNhi10761_ACG	11004255	F6-001-RNA-014-04A11-8741	2817	ASO_G0259091_AD_04	LINC00517	ENSG00000259091	lncRNA_antisense	Targeted lncRNA
335	CNhi10490_ACC	11000591	F6-001-RNA-003-03G01-1A4C	2458	ASO_G0259091_01	LINC00517	ENSG00000259091	lncRNA_antisense	Targeted lncRNA
336	CNhi10758_GCG	8971165	F6-001-RNA-014-04B11-1D02	2817	ASO_G0259091_AD_04	LINC00517	ENSG00000259091	lncRNA_antisense	Targeted lncRNA
337	CNhi10489_CAC	9484852	F6-001-RNA-003-03H01-BA61	2458	ASO_G0259091_01	LINC00517	ENSG00000259091	lncRNA_antisense	Targeted lncRNA
338	CNhi10472_AGT	12898851	F6-001-RNA-002-02C09-4358	2445	ASO_G0223546_02	LINC00630	ENSG00000223546	lncRNA_sense_intronic	Targeted lncRNA
339	CNhi10470_ATG	18163728	F6-001-RNA-002-02A09-AF4F	2445	ASO_G0223546_01	LINC00630	ENSG00000223546	lncRNA_sense_intronic	Targeted lncRNA
340	CNhi10471_ATG	16503555	F6-001-RNA-002-02D09-75C3	2445	ASO_G0223546_02	LINC00630	ENSG00000223546	lncRNA_sense_intronic	Targeted lncRNA
341	CNhi10471_ACC	16096982	F6-001-RNA-002-02B09-923A	2445	ASO_G0223546_01	LINC00630	ENSG00000223546	lncRNA_sense_intronic	Targeted lncRNA
342	CNhi10475_AGT	10990595	F6-001-RNA-002-03A03-310B	2445	ASO_G0205181_01	LINC00654	ENSG00000205181	lncRNA_intergenic	Targeted lncRNA
343	CNhi10475_ACC	12991520	F6-001-RNA-002-03B03-AB28	2445	ASO_G0205181_01	LINC00654	ENSG00000205181	lncRNA_intergenic	Targeted lncRNA
344	CNhi10637_AGT	5157061	F6-001-RNA-012-03G04-15C5	2601	ASO_G0260032_AD_01	LINC00657	ENSG00000260032	lncRNA_intergenic	Targeted lncRNA
345	CNhi10636_GCG	6798968	F6-001-RNA-012-03F04-199B	2601	ASO_G0260032_AD_06	LINC00657	ENSG00000260032	lncRNA_intergenic	Targeted lncRNA
346	CNhi10636_CAC	7014524	F6-001-RNA-012-03H04-108C	2601	ASO_G0260032_AD_01	LINC00657	ENSG00000260032	lncRNA_intergenic	Targeted lncRNA
347	CNhi10629_GCG	6290654	F6-001-RNA-012-03E04-85F3	2601	ASO_G0260032_AD_06	LINC00657	ENSG00000260032	lncRNA_intergenic	Targeted lncRNA
348	CNhi10584_TAC	10386076	F6-001-RNA-009-02A04-7190	2562	ASO_G0263753_01	LINC00667	ENSG00000263753	lncRNA_intergenic	Failed QC
349	CNhi10584_ACG	8702290	F6-001-RNA-009-02B04-B1F5	2562	ASO_G0263753_01	LINC00667	ENSG00000263753	lncRNA_intergenic	Failed QC
350	CNhi10788_CAC	11051554	F6-001-RNA-016-03E07-D09B	2860	ASO_G0263753_AD_01	LINC00667	ENSG00000263753	lncRNA_intergenic	Targeted lncRNA
351	CNhi10783_CAC	12285409	F6-001-RNA-016-03G08-848D	2860	ASO_G0263753_AD_06	LINC00667	ENSG00000263753	lncRNA_intergenic	Targeted lncRNA
352	CNhi10782_ATG	15568907	F6-001-RNA-016-03H08-B129	2860	ASO_G0263753_AD_06	LINC00667	ENSG00000263753	lncRNA_intergenic	Targeted lncRNA
353	CNhi10782_GCG	11906899	F6-001-RNA-016-03F07-48AC	2860	ASO_G0263753_AD_01	LINC00667	ENSG00000263753	lncRNA_intergenic	Targeted lncRNA
354	CNhi10605_CAC	10930570	F6-001-RNA-010-03A08-E0BA	2577	ASO_G0237854_05	LINC00674	ENSG00000237854	pseudogene	Targeted lncRNA
355	CNhi10604_ACC	11556483	F6-001-RNA-010-03B08-02DE	2577	ASO_G0237854_05	LINC00674	ENSG00000237854	pseudogene	Targeted lncRNA
356	CNhi10789_ACC	14911470	F6-001-RNA-015-02E04-4AE4	2860	ASO_G0237854_AD_02	LINC00674	ENSG00000237854	pseudogene	Targeted lncRNA
357	CNhi10786_ATG	16207218	F6-001-RNA-015-02E05-F078	2860	ASO_G0237854_AD_04	LINC00674	ENSG00000237854	pseudogene	Targeted lncRNA
358	CNhi10782_GCT	12736080	F6-001-RNA-015-02F04-CF1E	2860	ASO_G0237854_AD_02	LINC00674	ENSG00000237854	pseudogene	Targeted lncRNA
359	CNhi10792_AGT	13498367	F6-001-RNA-015-02F05-1232	2860	ASO_G0237854_AD_04	LINC00674	ENSG00000237854	pseudogene	Targeted lncRNA
360	CNhi10462_ATG	12317811	F6-001-RNA-001-03F01-8F71	2415	ASO_G0233117_02	LINC00702	ENSG00000233117	lncRNA_intergenic	Targeted lncRNA
361	CNhi10458_CAC	10248135	F6-001-RNA-001-01F01-074A	2415	ASO_G0233117_02	LINC00702	ENSG00000233117	lncRNA_intergenic	Targeted lncRNA
362	CNhi10463_AGT	13562869	F6-001-RNA-001-01F02-0F2D	2415	ASO_G0233117_04	LINC00702	ENSG00000233117	lncRNA_intergenic	Targeted lncRNA
363	CNhi10457_AGT	13721594	F6-001-RNA-001-03F02-BD5A	2415	ASO_G0233117_04	LINC00702	ENSG00000233117	lncRNA_intergenic	Targeted lncRNA
364	CNhi10760_TAC	16364108	F6-001-RNA-014-03C08-9B0D	2817	ASO_G0238266_AD_06	LINC00707	ENSG00000238266	lncRNA_intergenic	Targeted lncRNA
365	CNhi10815_GCT	8666160	F6-001-RNA-021-03C08-3B09	2866	ASO_G0238266_AD_06	LINC00707	ENSG00000238266	lncRNA_intergenic	Targeted lncRNA
366	CNhi10604_TAC	9891740	F6-001-RNA-010-02F07-5185	2577	ASO_G0238266_03	LINC00707	ENSG00000238266	lncRNA_intergenic	Targeted lncRNA
367	CNhi10814_AGT	12939325	F6-001-RNA-021-03D08-F5ED	2866	ASO_G0238266_AD_06	LINC00707	ENSG00000238266	lncRNA_intergenic	Targeted lncRNA
368	CNhi10612_ATG	8143413	F6-001-RNA-010-02E07-1D7A	2577	ASO_G0238266_03	LINC00707	ENSG00000238266	lncRNA_intergenic	Targeted lncRNA
369	CNhi10490_ACG	10472694	F6-001-RNA-003-01H10-D6F1	2458	ASO_G0230417_01	LINC00856	ENSG00000230417	lncRNA_intergenic	Targeted lncRNA
370	CNhi10495_ACC	9614664	F6-001-RNA-003-01F10-FF3E	2458	ASO_G0230417_02	LINC00856	ENSG00000230417	lncRNA_intergenic	Targeted lncRNA
371	CNhi10487_CAC	10351032	F6-001-RNA-003-01G10-5575	2458	ASO_G0230417_01	LINC00856	ENSG00000230417	lncRNA_intergenic	Targeted lncRNA
372	CNhi10487_GCG	9105968	F6-001-RNA-003-01E10-B211	2458	ASO_G0230417_02	LINC00856	ENSG00000230417	lncRNA_intergenic	Targeted lncRNA
373	CNhi10489_ACG	11746144	F6-001-RNA-003-04C05-6ABD	2458	ASO_G0203721_02	LINC00862	ENSG00000203721	lncRNA_intergenic	Targeted lncRNA
374	CNhi10491_TAC	13248790	F6-001-RNA-003-04B06-7AB8	2458	ASO_G0203721_05	LINC00862	ENSG00000203721	lncRNA_intergenic	Targeted lncRNA
375	CNhi10497_ACG	9217527	F6-001-RNA-003-04D05-584E	2458	ASO_G0203721_02	LINC00862	ENSG00000203721	lncRNA_intergenic	Targeted lncRNA
376	CNhi10487_ATG	13194111	F6-001-RNA-003-04A06-DAE6	2458	ASO_G0203721_05	LINC00862	ENSG00000203721	lncRNA_intergenic	Targeted lncRNA
377	CNhi10452_GCG	10295888	F6-001-RNA-001-03B07-07C2	2415	ASO_G0243701_01	LINC00883	ENSG00000243701	lncRNA_intergenic	Targeted lncRNA
378	CNhi10608_AGT	8457445	F6-001-RNA-011-01H09-1E84	2577	ASO_G0243701_AD_09	LINC00883	ENSG00000243701	lncRNA_intergenic	Targeted lncRNA
379	CNhi10601_TAC	11889669	F6-001-RNA-011-01F08-8187	2577	ASO_G0243701_AD_08	LINC00883	ENSG00000243701	lncRNA_intergenic	Targeted lncRNA
380	CNhi10605_ACG	11834781	F6-001-RNA-011-01G07-92BA	2577	ASO_G0243701_01	LINC00883	ENSG00000243701	lncRNA_intergenic	Targeted lncRNA
381	CNhi10490_ATG	12673578	F6-001-RNA-003-02B08-323C	2458	ASO_G0240875_03	LINC00886	ENSG00000240875	lncRNA_intergenic	Targeted lncRNA
382	CNhi10486_GCT	13066146	F6-001-RNA-003-02A09-1ECD	2458	ASO_G0240875_10	LINC00886	ENSG00000240875	lncRNA_intergenic	Targeted lncRNA
383	CNhi10490_CAC	7868492	F6-001-RNA-003-02C08-E612	2458	ASO_G0240875_02	LINC00886	ENSG00000240875	lncRNA_intergenic	Targeted lncRNA
384	CNhi10492_CAC	7972398	F6-001-RNA-003-02B09-B635	2458	ASO_G0240875_10	LINC00886	ENSG00000240875	lncRNA_intergenic	Targeted lncRNA
385	CNhi10491_GCT	12713100	F6-001-RNA-003-02D09-518B	2458	ASO_G0240875_04	LINC00886	ENSG00000240875	lncRNA_intergenic	Targeted lncRNA
386	CNhi10495_GCT	9937546	F6-001-RNA-003-02C09-0178	2458	ASO_G0240875_04	LINC00886	ENSG00000240875	lncRNA_intergenic	Targeted lncRNA
387	CNhi10493_ACC	9075983	F6-001-RNA-003-02A08-B0DD	2458	ASO_G0240875_03	LINC00886	ENSG00000240875	lncRNA_intergenic	Targeted lncRNA
388	CNhi10491_GCG	9435465	F6-001-RNA-003-02B07-2B26	2458	ASO_G0240875_01	LINC00886	ENSG00000240875	lncRNA_intergenic	Targeted lncRNA
389	CNhi10486_ACC	12673114	F6-001-RNA-003-02A07-E578	2458	ASO_G0240875_01	LINC00886	ENSG00000240875	lncRNA_intergenic	Targeted lncRNA
390	CNhi10494_ATG	13934635	F6-001-RNA-003-02D08-C575	2458	ASO_G0240875_02	LINC00886	ENSG00000240875	lncRNA_intergenic	Targeted lncRNA
391	CNhi10604_AGT	12932209	F6-001-RNA-011-02H05-A6E8	2577	ASO_G0273015_AD_07	LINC00938	ENSG00000273015	lncRNA_intergenic	Targeted lncRNA
392	CNhi10605_TAC	13546111	F6-001-RNA-011-02H06-FD7C	2577	ASO_G0273015_AD_10	LINC00938	ENSG00000273015	lncRNA_intergenic	Targeted lncRNA
393	CNhi10608_TAC	10508581	F6-001-RNA-011-02G06-35A3	2577	ASO_G0273015_05	LINC00938	ENSG00000273015	lncRNA_intergenic	Targeted lncRNA
394	CNhi10455_GCG	9408120	F6-001-RNA-001-02G12-A4E8	2415	ASO_G0273015_05	LINC00938	ENSG00000273015	lncRNA_intergenic	Targeted lncRNA
395	CNhi10463_CAC	10086256	F6-001-RNA-001-04G12-5B31	2415	ASO_G0273015_05	LINC00938	ENSG00000273015	lncRNA_intergenic	Targeted lncRNA
396	CNhi10813_ACG	10627445	F6-001-RNA-021-03A09-BF51	2866	ASO_G0237489_AD_01	LINC00959	ENSG00000237489	lncRNA_intergenic	Targeted lncRNA
397	CNhi10818_GCT	7944962	F6-001-RNA-021-03B09-5917	2866	ASO_G0237489_AD_01	LINC00959	ENSG00000237489	lncRNA_intergenic	Targeted lncRNA
398	CNhi10608_GCT	9271243	F6-001-RNA-010-02A09-AD2A	2577	ASO_G0237489_09	LINC00959	ENSG00000237489	lncRNA_intergenic	Targeted lncRNA
399	CNhi10609_GCT	9601693	F6-001-RNA-010-02B09-681B	2577	ASO_G0237489_09	LINC00959	ENSG00000237489	lncRNA_intergenic	Targeted lncRNA
400	CNhi10759_TAC	16311169	F6-001-RNA-014-03A04-F8D1	2817	ASO_G0237489_AD_01	LINC00959	ENSG00000237489	lncRNA_intergenic	Targeted lncRNA
401	CNhi10487_ACG	11043964	F6-001-RNA-003-04H04-37F0	2458	ASO_G0204054_01	LINC00963	ENSG00000204054	lncRNA_intergenic	Targeted lncRNA
402	CNhi10486_TAC	12401426	F6-001-RNA-003-04E05-C8DB	2458	ASO_G0204054_06	LINC00963	ENSG00000204054	lncRNA_intergenic	Targeted lncRNA
403	CNhi10493_TAC	12489909	F6-001-RNA-003-04G04-4B40	2458	ASO_G0204054_01	LINC00963	ENSG00000204054	lncRNA_intergenic	Targeted lncRNA
404	CNhi10496_TAC	10458501	F6-001-RNA-003-04H06-3C1F	2458	ASO_G0204054_10	LINC00963	ENSG00000204054	lncRNA_intergenic	Targeted lncRNA
405	CNhi10494_GCG	7841819	F6-001-RNA-003-04G06-ACD6	2458	ASO_G0204054_10	LINC00963	ENSG00000204054	lncRNA_intergenic	Targeted lncRNA
406	CNhi10496_ATG	10242438	F6-001-RNA-003-04F05-FC30	2458	ASO_G0204054_06	LINC00963	ENSG00000204054	lncRNA_intergenic	Targeted lncRNA
407	CNhi10469_AGT	10035104	F6-001-RNA-002-04A05-5FA6	2445	ASO_G0246430_03	LINC00968	ENSG00000246430	lncRNA_divergent	Targeted lncRNA
408	CNhi10834_ATG	14087608	F6-001-RNA-019-04B07-E299	2861	ASO_G0246430_AD_03	LINC00968	ENSG00000246430	lncRNA_divergent	Targeted lncRNA
409	CNhi10474_ACG	12017597	F6-001-RNA-002-04B05-CD0F	2445	ASO_G0246430_03	LINC00968	ENSG00000246430	lncRNA_divergent	Targeted lncRNA
410	CNhi10837_GCG	5613710	F6-001-RNA-019-04A07-2620	2861	ASO_G0246430_AD_03	LINC00968	ENSG00000246430	lncRNA_divergent	Targeted lncRNA
411	CNhi10832_GCT	8402149	F6-001-RNA-019-03F11-CE9F	2861	ASO_Lipo	Lipo	Lipo	other	Mock Transfection
412	CNhi10786_TAC	17873576	F6-001-RNA-015-01F11-3469	2860	ASO_Lipo	Lipo	Lipo	other	Mock Transfection
413	CNhi10767_TAC	16644201	F6-001-RNA-013-01E11-0BD9	2817	ASO_Lipo	Lipo	Lipo	other	Mock Transfection
414	CNhi10805_ACC	8768484	F6-001-RNA-018-01E11-B47A	2861	ASO_Lipo	Lipo	Lipo	other	Mock Transfection
415	CNhi10811_GCG	8413090	F6-001-RNA-021-03D10-3DA2	2866	ASO_Lipo	Lipo	Lipo	other	Mock Transfection
416	CNhi10762_GCT	10763161	F6-001-RNA-014-03F11-E228	2817	ASO_Lipo	Lipo	Lipo	other	Mock Transfection
417	CNhi10782_CAC	11897321	F6-001-RNA-015-01E11-1B95	2860	ASO_Lipo	Lipo	Lipo	other	Mock Transfection
418	CNhi10809_GCT	9224885	F6-001-RNA-020-01D10-9C75	2866	ASO_Lipo	Lipo	Lipo	other	Mock Transfection
419	CNhi10765_ATG	15353885	F6-001-RNA-013-01F11-0A16	2817	ASO_Lipo	Lipo	Lipo	other	Mock Transfection
420	CNhi10818_GCG	8075114	F6-001-RNA-020-01D07-B251	2866	ASO_Lipo	Lipo	Lipo	other	Mock Transfection
421	CNhi10782_ACC	17113576	F6-001-RNA-016-03F11-BE76	2860	ASO_Lipo	Lipo	Lipo	other	Mock Transfection
422	CNhi10764_GCT	12153815	F6-001-RNA-014-03E11-149F	2817	ASO_Lipo	Lipo	Lipo	other	Mock Transfection
423	CNhi10792_TAC	12220211	F6-001-RNA-016-03E11-6BC9	2860	ASO_Lipo	Lipo	Lipo	other	Mock Transfection
424	CNhi10804_ATG	9563807	F6-001-RNA-018-01F11-EFFC	2861	ASO_Lipo	Lipo	Lipo	other	Mock Transfection
425	CNhi10833_TAC	17404933	F6-001-RNA-019-03E11-DD0C	2861	ASO_Lipo	Lipo	Lipo	other	Mock Transfection
426	CNhi10523_CAC	17723672	F6-001-RNA-004-04E07-B2E7	2514	ASO_G0224086_04	LL22NC03-86G7.1	ENSG00000224086	lncRNA_divergent	Targeted lncRNA
427	CNhi10529_ACG	9333697	F6-001-RNA-004-04F07-E03A	2514	ASO_G0224086_04	LL22NC03-86G7.1	ENSG00000224086	lncRNA_divergent	Targeted lncRNA
428	CNhi10523_TAC	15192140	F6-001-RNA-004-04H07-4238	2514	ASO_G0224086_03	LL22NC03-86G7.1	ENSG00000224086	lncRNA_divergent	Targeted lncRNA
429	CNhi10530_AGT	9086636	F6-001-RNA-004-04G07-8CD8	2514	ASO_G0224086_03	LL22NC03-86G7.1	ENSG00000224086	lncRNA_divergent	Targeted lncRNA
430	CNhi10525_GCG	9924424	F6-001-RNA-004-04E08-6DE0	2514	ASO_G0224086_06	LL22NC03-86G7.1	ENSG00000224086	lncRNA_divergent	Targeted lncRNA
431	CNhi10529_ACC	9202291	F6-001-RNA-004-04F08-F9F2	2514	ASO_G0224086_06	LL22NC03-86G7.1	ENSG00000224086	lncRNA_divergent	Targeted lncRNA
432	CNhi10536_TAC	9899214	F6-001-RNA-006-02E08-A5A2	2515	ASO_G0234456_04	MAGI2-AS3	ENSG00000234456	lncRNA_divergent	Targeted lncRNA
433	CNhi10539_ATG	10523668	F6-001-RNA-006-02H07-2FD1	2515	ASO_G0234456_01	MAGI2-AS3	ENSG00000234456	lncRNA_divergent	Targeted lncRNA
434	CNhi10533_ACC	7682939	F6-001-RNA-006-02F08-B136	2515	ASO_G0234456_04	MAGI2-AS3	ENSG00000234456	lncRNA_divergent	Targeted lncRNA
435	CNhi10535_AGT	9352667	F6-001-RNA-006-02G07-D390	2515	ASO_G0234456_01	MAGI2-AS3	ENSG00000234456	lncRNA_divergent	Targeted lncRNA
436	CNhi10534_GCT	10812502	F6-001-RNA-005-04D10-8572	2515	ASO_MALAT1	MALAT1	ENSG00000251562	lncRNA_intergenic	Experimental Control
437	CNhi10611_TAC	8364998	F6-001-RNA-010-02C01-EFEC	2577	ASO_MALAT1	MALAT1	ENSG00000251562	lncRNA_intergenic	Experimental Control
438	CNhi10458_ACG	17937058	F6-001-RNA-001-04C01-5008	2415	ASO_MALAT1	MALAT1	ENSG00000251562	lncRNA_intergenic	Experimental Control
439	CNhi10636_ACG	9102201	F6-001-RNA-012-02C07-663B	2601	ASO_MALAT1	MALAT1	ENSG00000251562	lncRNA_intergenic	Experimental Control
440	CNhi10764_ACG	12608618	F6-001-RNA-014-04H10-975C	2817	ASO_MALAT1	MALAT1	ENSG00000251562	lncRNA_intergenic	Experimental Control
441	CNhi10608_ACC	7260605	F6-001-RNA-010-01C01-1FCA	2577	ASO_MALAT1	MALAT1	ENSG00000251562	lncRNA_intergenic	Experimental Control
442	CNhi10762_AGT	11758656	F6-001-RNA-017-05D01-FFAA	2817	ASO_MALAT1	MALAT1	ENSG00000251562	lncRNA_intergenic	Experimental Control
443	CNhi10639_TAC	8619722	F6-001-RNA-012-03C04-A590	2601	ASO_MALAT1	MALAT1	ENSG00000251562	lncRNA_intergenic	Experimental Control
444	CNhi10587_ACG	8431102	F6-001-RNA-009-03C10-DC80	2562	ASO_MALAT1	MALAT1	ENSG00000251562	lncRNA_intergenic	Failed QC
445	CNhi10453_ACC	14275783	F6-001-RNA-001-01D07-B62F	2415	ASO_MALAT1	MALAT1	ENSG00000251562	lncRNA_intergenic	Experimental Control
446	CNhi10454_ATG	13911523	F6-001-RNA-001-04C07-F8CF	2415	ASO_MALAT1	MALAT1	ENSG00000251562	lncRNA_intergenic	Experimental Control
447	CNhi10468_GCG	9722667	F6-001-RNA-002-04D10-E88C	2445	ASO_MALAT1	MALAT1	ENSG00000251562	lncRNA_intergenic	Experimental Control
448	CNhi10757_GCG	6801243	F6-001-RNA-013-01H01-5796	2817	ASO_MALAT1	MALAT1	ENSG00000251562	lncRNA_intergenic	Experimental Control
449	CNhi10578_ATG	8238589	F6-001-RNA-006-03C01-0768	2562	ASO_MALAT1	MALAT1	ENSG00000251562	lncRNA_intergenic	Failed QC
450	CNhi10607_TAC	9750536	F6-001-RNA-010-04C01-2A69	2577	ASO_MALAT1	MALAT1	ENSG00000251562	lncRNA_intergenic	Experimental Control
451	CNhi10761_TAC	16250329	F6-001-RNA-013-01D10-CAD5	2817	ASO_MALAT1	MALAT1	ENSG00000251562	lncRNA_intergenic	Experimental Control
452	CNhi10475_CAC	8977269	F6-001-RNA-002-02C01-882C	2445	ASO_MALAT1	MALAT1	ENSG00000251562	lncRNA_intergenic	Experimental Control
453	CNhi10764_ATG	14160290	F6-001-RNA-013-02H01-0A67	2817	ASO_MALAT1	MALAT1	ENSG00000251562	lncRNA_intergenic	Experimental Control
454	CNhi10836_ATG	10057068	F6-001-RNA-018-01D07-B558	2861	ASO_MALAT1	MALAT1	ENSG00000251562	lncRNA_intergenic	Experimental Control
455	CNhi10578_TAC	8776729	F6-001-RNA-006-03D10-E755	2562	ASO_MALAT1	MALAT1	ENSG00000251562	lncRNA_intergenic	Failed QC
456	CNhi10803_GCG	7666139	F6-001-RNA-019-04D07-3AB4	2861	ASO_MALAT1	MALAT1	ENSG00000251562	lncRNA_intergenic	Experimental Control
457	CNhi10587_ATG	9030072	F6-001-RNA-009-01C01-0B46	2562	ASO_MALAT1	MALAT1	ENSG00000251562	lncRNA_intergenic	Failed QC
458	CNhi10472_ACC	11862834	F6-001-RNA-002-01C01-72F9	2445	ASO_MALAT1	MALAT1	ENSG00000251562	lncRNA_intergenic	Experimental Control
459	CNhi10791_ACG	14694809	F6-001-RNA-016-03H07-A420	2860	ASO_MALAT1	MALAT1	ENSG00000251562	lncRNA_intergenic	Experimental Control
460	CNhi10790_GCT	10771317	F6-001-RNA-015-02H04-60FF	2860	ASO_MALAT1	MALAT1	ENSG00000251562	lncRNA_intergenic	Experimental Control
461	CNhi10813_AGT	8157182	F6-001-RNA-020-01D01-64BF	2866	ASO_MALAT1	MALAT1	ENSG00000251562	lncRNA_intergenic	Experimental Control
462	CNhi10453_ATG	16190888	F6-001-RNA-001-04D04-8EB7	2415	ASO_MALAT1	MALAT1	ENSG00000251562	lncRNA_intergenic	Experimental Control
463	CNhi10814_ACG	10428347	F6-001-RNA-021-03H01-2070	2866	ASO_MALAT1	MALAT1	ENSG00000251562	lncRNA_intergenic	Experimental Control
464	CNhi10758_CAC	10874259	F6-001-RNA-014-03D04-1950	2817	ASO_MALAT1	MALAT1	ENSG00000251562	lncRNA_intergenic	Experimental Control
465	CNhi10537_GCG	6308072	F6-001-RNA-006-01C01-2039	2515	ASO_MALAT1	MALAT1	ENSG00000251562	lncRNA_intergenic	Experimental Control
466	CNhi10788_ATG	10853964	F6-001-RNA-016-04D07-9986	2860	ASO_MALAT1	MALAT1	ENSG00000251562	lncRNA_intergenic	Experimental Control
467	CNhi10539_AGT	8686331	F6-001-RNA-005-04C07-5349	2515	ASO_MALAT1	MALAT1	ENSG00000251562	lncRNA_intergenic	Experimental Control
468	CNhi10537_TAC	11251612	F6-001-RNA-005-03C10-0E1A	2515	ASO_MALAT1	MALAT1	ENSG00000251562	lncRNA_intergenic	Experimental Control
469	CNhi10783_GCG	9037681	F6-001-RNA-015-01D10-80C9	2860	ASO_MALAT1	MALAT1	ENSG00000251562	lncRNA_intergenic	Experimental Control
470	CNhi10640_TAC	10636108	F6-001-RNA-012-01C10-79B9	2601	ASO_MALAT1	MALAT1	ENSG00000251562	lncRNA_intergenic	Experimental Control
471	CNhi10809_ACG	15974049	F6-001-RNA-020-02D01-D7D1	2866	ASO_MALAT1	MALAT1	ENSG00000251562	lncRNA_intergenic	Experimental Control
472	CNhi10765_AGT	13422575	F6-001-RNA-014-04D04-FD03	2817	ASO_MALAT1	MALAT1	ENSG00000251562	lncRNA_intergenic	Experimental Control
473	CNhi10452_CAC	11970092	F6-001-RNA-001-01C07-FE82	2415	ASO_MALAT1	MALAT1	ENSG00000251562	lncRNA_intergenic	Experimental Control
474	CNhi10538_GCT	11129838	F6-001-RNA-005-03C07-0AE3	2515	ASO_MALAT1	MALAT1	ENSG00000251562	lncRNA_intergenic	Experimental Control
475	CNhi10607_ATG	7730816	F6-001-RNA-010-01D07-D380	2577	ASO_MALAT1	MALAT1	ENSG00000251562	lncRNA_intergenic	Experimental Control
476	CNhi10578_ACG	7881269	F6-001-RNA-006-03D07-914E	2562	ASO_MALAT1	MALAT1	ENSG00000251562	lncRNA_intergenic	Failed QC
477	CNhi10635_AGT	5362217	F6-001-RNA-012-04C07-0F07	2601	ASO_MALAT1	MALAT1	ENSG00000251562	lncRNA_intergenic	Experimental Control
478	CNhi10587_TAC	8655189	F6-001-RNA-009-02C01-5B6C	2562	ASO_MALAT1	MALAT1	ENSG00000251562	lncRNA_intergenic	Failed QC
479	CNhi10801_GCT	9193957	F6-001-RNA-019-03D07-F416	2861	ASO_MALAT1	MALAT1	ENSG00000251562	lncRNA_intergenic	Experimental Control
480	CNhi10471_CAC	8999596	F6-001-RNA-002-03C01-C5FD	2445	ASO_MALAT1	MALAT1	ENSG00000251562	lncRNA_intergenic	Experimental Control
481	CNhi10605_ATG	11751274	F6-001-RNA-010-03C10-7C54	2577	ASO_MALAT1	MALAT1	ENSG00000251562	lncRNA_intergenic	Experimental Control
482	CNhi10581_ACC	7856850	F6-001-RNA-006-04D01-95D4	2562	ASO_MALAT1	MALAT1	ENSG00000251562	lncRNA_intergenic	Failed QC
483	CNhi10452_ACG	12675647	F6-001-RNA-001-03C04-F218	2415	ASO_MALAT1	MALAT1	ENSG00000251562	lncRNA_intergenic	Experimental Control
484	CNhi10763_ACC	13435936	F6-001-RNA-014-03D07-6E1F	2817	ASO_MALAT1	MALAT1	ENSG00000251562	lncRNA_intergenic	Experimental Control
485	CNhi10801_GCG	5347290	F6-001-RNA-021-02D07-421E	2861	ASO_MALAT1	MALAT1	ENSG00000251562	lncRNA_intergenic	Experimental Control
486	CNhi10460_AGT	14386988	F6-001-RNA-001-02D07-EC4E	2415	ASO_MALAT1	MALAT1	ENSG00000251562	lncRNA_intergenic	Experimental Control
487	CNhi10542_ACG	8513531	F6-001-RNA-006-02C04-B26B	2515	ASO_MALAT1	MALAT1	ENSG00000251562	lncRNA_intergenic	Experimental Control
488	CNhi10758_ACC	15033899	F6-001-RNA-013-02F02-A39D	2817	ASO_G0234608_AD_04	MAPKAPK5-AS1	ENSG00000234608	lncRNA_divergent	Targeted lncRNA
489	CNhi10757_ATG	16678920	F6-001-RNA-013-02E02-1D0A	2817	ASO_G0234608_AD_04	MAPKAPK5-AS1	ENSG00000234608	lncRNA_divergent	Targeted lncRNA
490	CNhi10758_AGT	13917195	F6-001-RNA-013-02F01-9D81	2817	ASO_G0234608_AD_01	MAPKAPK5-AS1	ENSG00000234608	lncRNA_divergent	Targeted lncRNA
491	CNhi10543_GCG	7210147	F6-001-RNA-006-02H11-2711	2515	ASO_G0234608_06	MAPKAPK5-AS1	ENSG00000234608	lncRNA_divergent	Targeted lncRNA
492	CNhi10759_ACC	12457941	F6-001-RNA-013-02E01-8CF6	2817	ASO_G0234608_AD_01	MAPKAPK5-AS1	ENSG00000234608	lncRNA_divergent	Targeted lncRNA
493	CNhi10540_TAC	8006149	F6-001-RNA-006-02G11-08E7	2515	ASO_G0234608_06	MAPKAPK5-AS1	ENSG00000234608	lncRNA_divergent	Targeted lncRNA
494	CNhi10454_AGT	14194534	F6-001-RNA-001-01A04-5AFA	2415	ASO_G0214548_01	MEG3	ENSG00000214548	lncRNA_intergenic	Targeted lncRNA
495	CNhi10632_TAC	11769126	F6-001-RNA-012-01D06-CE13	2601	ASO_G0214548_AD_09	MEG3	ENSG00000214548	lncRNA_intergenic	Targeted lncRNA
496	CNhi10462_TAC	13818061	F6-001-RNA-001-03A04-BF7C	2415	ASO_G0214548_01	MEG3	ENSG00000214548	lncRNA_intergenic	Targeted lncRNA
497	CNhi10633_CAC	11257533	F6-001-RNA-012-01B04-7D4E	2601	ASO_G0214548_AD_06	MEG3	ENSG00000214548	lncRNA_intergenic	Targeted lncRNA
498	CNhi10766_ACC	14785217	F6-001-RNA-013-01G11-5079	2817	ASO_G0214548_AD_06	MEG3	ENSG00000214548	lncRNA_intergenic	Targeted lncRNA
499	CNhi10767_GCT	8969033	F6-001-RNA-013-01H11-7992	2817	ASO_G0214548_AD_06	MEG3	ENSG00000214548	lncRNA_intergenic	Targeted lncRNA
500	CNhi10767_GCG	7435023	F6-001-RNA-014-03H11-5BF2	2817	ASO_G0214548_AD_06	MEG3	ENSG00000214548	lncRNA_intergenic	Targeted lncRNA
501	CNhi10640_ATG	7704015	F6-001-RNA-012-01C06-B863	2601	ASO_G0214548_AD_09	MEG3	ENSG00000214548	lncRNA_intergenic	Targeted lncRNA
502	CNhi10632_ACC	12041256	F6-001-RNA-012-01A04-CA10	2601	ASO_G0214548_AD_06	MEG3	ENSG00000214548	lncRNA_intergenic	Targeted lncRNA
503	CNhi10524_ACG	12473999	F6-001-RNA-004-03G08-5D3B	2514	ASO_G0228109_06	MFI2-AS1	ENSG00000228109	lncRNA_divergent	Targeted lncRNA
504	CNhi10528_GCG	8913203	F6-001-RNA-004-03H08-494B	2514	ASO_G0228109_06	MFI2-AS1	ENSG00000228109	lncRNA_divergent	Targeted lncRNA
505	CNhi10531_AGT	8291194	F6-001-RNA-004-03E08-D69C	2514	ASO_G0228109_07	MFI2-AS1	ENSG00000228109	lncRNA_divergent	Targeted lncRNA
506	CNhi10528_ACC	13139307	F6-001-RNA-004-03F08-AAA3	2514	ASO_G0228109_07	MFI2-AS1	ENSG00000228109	lncRNA_divergent	Targeted lncRNA
507	CNhi10804_GCG	5600515	F6-001-RNA-019-03A07-3707	2861	ASO_G0236753_AD_01	MKLN1-AS2	ENSG00000236753	lncRNA_divergent	Targeted lncRNA
508	CNhi10833_GCT	7571599	F6-001-RNA-019-03B07-2A8C	2861	ASO_G0236753_AD_01	MKLN1-AS2	ENSG00000236753	lncRNA_divergent	Targeted lncRNA
509	CNhi10579_CAC	7399757	F6-001-RNA-006-03F03-A5D1	2562	ASO_NC_A	NC_A	NC_A	other	Failed QC
510	CNhi10537_AGT	11102845	F6-001-RNA-005-03F09-FDF0	2515	ASO_NC_A	NC_A	NC_A	other	Negative Control
511	CNhi10639_ACG	11079941	F6-001-RNA-012-01E12-E587	2601	ASO_NC_A	NC_A	NC_A	other	Negative Control
512	CNhi10639_AGT	7069232	F6-001-RNA-012-01E06-5EFB	2601	ASO_NC_A	NC_A	NC_A	other	Failed QC
513	CNhi10532_CAC	9445387	F6-001-RNA-005-01E09-D926	2514	ASO_NC_A	NC_A	NC_A	other	Negative Control
514	CNhi10452_TAC	6906251	F6-001-RNA-001-03E06-1F63	2415	ASO_NC_A	NC_A	NC_A	other	Failed QC
515	CNhi10814_CAC	11223479	F6-001-RNA-013-02C01-F05E	2866	ASO_NC_A	NC_A	NC_A	other	Negative Control
516	CNhi10471_ACG	10666438	F6-001-RNA-002-04E06-50EB	2445	ASO_NC_A	NC_A	NC_A	other	Negative Control
517	CNhi10494_GCT	9225946	F6-001-RNA-003-02E03-8F86	2458	ASO_NC_A	NC_A	NC_A	other	Negative Control
518	CNhi10533_GCG	5867823	F6-001-RNA-005-03E03-F70A	2515	ASO_NC_A	NC_A	NC_A	other	Negative Control
519	CNhi10581_CAC	8627557	F6-001-RNA-006-04E03-2322	2562	ASO_NC_A	NC_A	NC_A	other	Failed QC
520	CNhi10581_GCG	6963230	F6-001-RNA-006-04F03-24B7	2562	ASO_NC_A	NC_A	NC_A	other	Failed QC
521	CNhi10609_CAC	11563930	F6-001-RNA-011-01F09-7657	2577	ASO_NC_A	NC_A	NC_A	other	Negative Control
522	CNhi10454_CAC	5397792	F6-001-RNA-001-03F03-C7AF	2415	ASO_NC_A	NC_A	NC_A	other	Failed QC
523	CNhi10495_TAC	9438356	F6-001-RNA-003-04E09-F9BA	2458	ASO_NC_A	NC_A	NC_A	other	Negative Control
524	CNhi10460_ACG	10408496	F6-001-RNA-001-03E12-8D57	2415	ASO_NC_A	NC_A	NC_A	other	Negative Control
525	CNhi10787_CAC	6449113	F6-001-RNA-017-05G01-6927	2860	ASO_NC_A	NC_A	NC_A	other	Negative Control
526	CNhi10610_ATG	7356973	F6-001-RNA-010-04F12-ADB3	2577	ASO_NC_A	NC_A	NC_A	other	Negative Control
527	CNhi10473_ACC	13715440	F6-001-RNA-002-03E12-C323	2445	ASO_NC_A	NC_A	NC_A	other	Negative Control
528	CNhi10496_GCG	6972913	F6-001-RNA-003-02E09-3AEE	2458	ASO_NC_A	NC_A	NC_A	other	Negative Control
529	CNhi10535_ATG	10510115	F6-001-RNA-005-04E09-B4A3	2515	ASO_NC_A	NC_A	NC_A	other	Negative Control
530	CNhi10473_CAC	10523086	F6-001-RNA-002-04E12-448F	2445	ASO_NC_A	NC_A	NC_A	other	Negative Control
531	CNhi10461_ACG	6272425	F6-001-RNA-001-03F06-509D	2415	ASO_NC_A	NC_A	NC_A	other	Negative Control
532	CNhi10588_TAC	9597607	F6-001-RNA-009-03F12-90F9	2562	ASO_NC_A	NC_A	NC_A	other	Failed QC
533	CNhi10497_ATG	10210328	F6-001-RNA-003-03E03-93F8	2458	ASO_NC_A	NC_A	NC_A	other	Negative Control
534	CNhi10611_GCG	6428568	F6-001-RNA-010-02E03-81AF	2577	ASO_NC_A	NC_A	NC_A	other	Negative Control
535	CNhi10601_AGT	9854229	F6-001-RNA-010-03E03-F55D	2577	ASO_NC_A	NC_A	NC_A	other	Negative Control
536	CNhi10536_CAC	6964909	F6-001-RNA-005-04E03-6B08	2515	ASO_NC_A	NC_A	NC_A	other	Negative Control
537	CNhi10456_TAC	15041074	F6-001-RNA-001-04F09-8D53	2415	ASO_NC_A	NC_A	NC_A	other	Negative Control
538	CNhi10474_GCT	11943194	F6-001-RNA-002-01E09-5CDA	2445	ASO_NC_A	NC_A	NC_A	other	Negative Control
539	CNhi10526_GCG	7000311	F6-001-RNA-005-02F09-1011	2514	ASO_NC_A	NC_A	NC_A	other	Negative Control
540	CNhi10488_ACG	8793810	F6-001-RNA-003-03E09-8DBE	2458	ASO_NC_A	NC_A	NC_A	other	Negative Control
541	CNhi10457_GCT	9849667	F6-001-RNA-001-01F06-7A5B	2415	ASO_NC_A	NC_A	NC_A	other	Negative Control
542	CNhi10790_ACG	12669390	F6-001-RNA-015-01G01-DD41	2860	ASO_NC_A	NC_A	NC_A	other	Negative Control
543	CNhi10760_CAC	9882932	F6-001-RNA-014-03C01-DAAC	2817	ASO_NC_A	NC_A	NC_A	other	Negative Control
544	CNhi10538_ACC	9482010	F6-001-RNA-005-03E09-677C	2515	ASO_NC_A	NC_A	NC_A	other	Negative Control
545	CNhi10602_TAC	10476485	F6-001-RNA-011-01F12-9A88	2577	ASO_NC_A	NC_A	NC_A	other	Negative Control
546	CNhi10522_GCG	8431201	F6-001-RNA-005-01F03-D047	2514	ASO_NC_A	NC_A	NC_A	other	Negative Control
547	CNhi10458_GCG	6098340	F6-001-RNA-001-02F06-51FA	2415	ASO_NC_A	NC_A	NC_A	other	Negative Control
548	CNhi10538_GCG	7032287	F6-001-RNA-006-02F09-3418	2515	ASO_NC_A	NC_A	NC_A	other	Negative Control
549	CNhi10458_TAC	8261704	F6-001-RNA-001-02E12-D777	2415	ASO_NC_A	NC_A	NC_A	other	Negative Control
550	CNhi10459_ACC	8775422	F6-001-RNA-001-04E12-FEFD	2415	ASO_NC_A	NC_A	NC_A	other	Negative Control
551	CNhi10635_ATG	7293771	F6-001-RNA-012-03E06-CEB9	2601	ASO_NC_A	NC_A	NC_A	other	Negative Control
552	CNhi10523_ATG	9353845	F6-001-RNA-004-03E09-9DA1	2514	ASO_NC_A	NC_A	NC_A	other	Negative Control
553	CNhi10804_TAC	8539422	F6-001-RNA-019-03G01-A22B	2861	ASO_NC_A	NC_A	NC_A	other	Negative Control
554	CNhi10767_ACG	11044974	F6-001-RNA-017-05C01-A46B	2817	ASO_NC_A	NC_A	NC_A	other	Negative Control
555	CNhi10833_ACC	10150641	F6-001-RNA-018-01C01-E252	2861	ASO_NC_A	NC_A	NC_A	other	Negative Control
556	CNhi10630_TAC	8390587	F6-001-RNA-012-04E09-BB2C	2601	ASO_NC_A	NC_A	NC_A	other	Negative Control
557	CNhi10816_GCT	10783509	F6-001-RNA-020-01C01-631D	2866	ASO_NC_A	NC_A	NC_A	other	Negative Control
558	CNhi10529_ATG	9170423	F6-001-RNA-004-01E03-667D	2514	ASO_NC_A	NC_A	NC_A	other	Negative Control
559	CNhi10524_CAC	11470961	F6-001-RNA-004-03E03-9071	2514	ASO_NC_A	NC_A	NC_A	other	Negative Control
560	CNhi10460_ATG	14314110	F6-001-RNA-001-01F12-A94D	2415	ASO_NC_A	NC_A	NC_A	other	Negative Control
561	CNhi10460_CAC	6980059	F6-001-RNA-001-01E12-21E1	2415	ASO_NC_A	NC_A	NC_A	other	Negative Control
562	CNhi10588_AGT	9504119	F6-001-RNA-009-02E03-CD7D	2562	ASO_NC_A	NC_A	NC_A	other	Failed QC
563	CNhi10588_ATG	9379883	F6-001-RNA-009-03E03-6622	2562	ASO_NC_A	NC_A	NC_A	other	Failed QC
564	CNhi10460_TAC	7235109	F6-001-RNA-001-02E06-6884	2415	ASO_NC_A	NC_A	NC_A	other	Negative Control
565	CNhi10525_AGT	17086814	F6-001-RNA-004-02E09-8338	2514	ASO_NC_A	NC_A	NC_A	other	Negative Control
566	CNhi10530_CAC	6877349	F6-001-RNA-004-04E03-0170	2514	ASO_NC_A	NC_A	NC_A	other	Negative Control
567	CNhi10637_CAC	6215536	F6-001-RNA-012-04E12-4C02	2601	ASO_NC_A	NC_A	NC_A	other	Negative Control
568	CNhi10637_GCG	9537670	F6-001-RNA-012-02E09-9F8C	2601	ASO_NC_A	NC_A	NC_A	other	Negative Control
569	CNhi10578_GCT	7738254	F6-001-RNA-006-03E03-E1C0	2562	ASO_NC_A	NC_A	NC_A	other	Failed QC
570	CNhi10601_ATG	6746256	F6-001-RNA-010-04E03-D0E5	2577	ASO_NC_A	NC_A	NC_A	other	Negative Control
571	CNhi10526_ACG	10534982	F6-001-RNA-005-01F09-8830	2514	ASO_NC_A	NC_A	NC_A	other	Negative Control
572	CNhi10462_ACG	8779804	F6-001-RNA-001-01E06-047C	2415	ASO_NC_A	NC_A	NC_A	other	Negative Control
573	CNhi10633_ATG	8136996	F6-001-RNA-012-03E09-891E	2601	ASO_NC_A	NC_A	NC_A	other	Negative Control
574	CNhi10469_GCG	8735783	F6-001-RNA-002-02E03-A337	2445	ASO_NC_A	NC_A	NC_A	other	Negative Control
575	CNhi10607_AGT	9553775	F6-001-RNA-011-02F06-3ECA	2577	ASO_NC_A	NC_A	NC_A	other	Negative Control
576	CNhi10526_TAC	12410419	F6-001-RNA-005-02F03-E843	2514	ASO_NC_A	NC_A	NC_A	other	Negative Control
577	CNhi10542_GCT	10795287	F6-001-RNA-005-04F03-5E16	2515	ASO_NC_A	NC_A	NC_A	other	Negative Control
578	CNhi10527_ACG	13805751	F6-001-RNA-004-04E09-D556	2514	ASO_NC_A	NC_A	NC_A	other	Negative Control
579	CNhi10602_GCG	6261316	F6-001-RNA-010-03F12-5834	2577	ASO_NC_A	NC_A	NC_A	other	Negative Control
580	CNhi10760_GCT	12350171	F6-001-RNA-013-02G01-B1EF	2817	ASO_NC_A	NC_A	NC_A	other	Negative Control
581	CNhi10463_GCT	7895097	F6-001-RNA-001-04E06-B988	2415	ASO_NC_A	NC_A	NC_A	other	Negative Control
582	CNhi10543_GCT	8475224	F6-001-RNA-006-02E03-DA63	2515	ASO_NC_A	NC_A	NC_A	other	Negative Control
583	CNhi10635_ACC	8931044	F6-001-RNA-012-04E06-DC72	2601	ASO_NC_A	NC_A	NC_A	other	Negative Control
584	CNhi10528_ACG	8421931	F6-001-RNA-005-02E09-DAA0	2514	ASO_NC_A	NC_A	NC_A	other	Negative Control
585	CNhi10489_GCT	11920222	F6-001-RNA-003-01E03-4FC3	2458	ASO_NC_A	NC_A	NC_A	other	Negative Control
586	CNhi10581_ATG	8888017	F6-001-RNA-006-04F09-BA77	2562	ASO_NC_A	NC_A	NC_A	other	Failed QC
587	CNhi10635_CAC	12897440	F6-001-RNA-012-01E12-E587	2601	ASO_NC_A	NC_A	NC_A	other	Negative Control
588	CNhi10786_CAC	9123651	F6-001-RNA-016-04C01-4989	2860	ASO_NC_A	NC_A	NC_A	other	Negative Control
589	CNhi10837_TAC	9602603	F6-001-RNA-019-03C07-9860	2861	ASO_NC_A	NC_A	NC_A	other	Negative Control
590	CNhi10636_ACC	7355830	F6-001-RNA-012-03E12-5909	2601	ASO_NC_A	NC_A	NC_A	other	Negative Control
591	CNhi10811_AGT	8125848	F6-001-RNA-020-01G01-D70E	2866	ASO_NC_A	NC_A	NC_A	other	Negative Control
592	CNhi10793_CAC	11363958	F6-001-RNA-016-04C07-EDAF	2860	ASO_NC_A	NC_A	NC_A	other	Negative Control
593	CNhi10467_GCG	9259937	F6-001-RNA-002-01E06-D0C6	2445	ASO_NC_A	NC_A	NC_A	other	Negative Control
594	CNhi10588_ACC	8646187	F6-001-RNA-009-01E03-CE27	2562	ASO_NC_A	NC_A	NC_A	other	Failed QC
595	CNhi10541_ACC	7569227	F6-001-RNA-006-01E03-D3A5	2515	ASO_NC_A	NC_A	NC_A	other	Negative Control
596	CNhi10634_ACG	8574676	F6-001-RNA-012-02E12-E12D	2601	ASO_NC_A	NC_A	NC_A	other	Negative Control
597	CNhi10579_ACC	7973518	F6-001-RNA-006-03E09-DBA5	2562	ASO_NC_A	NC_A	NC_A	other	Failed QC
598	CNhi10811_TAC	10659654	F6-001-RNA-021-03C07-C40A	2866	ASO_NC_A	NC_A	NC_A	other	Negative Control
599	CNhi10579_AGT	8790695	F6-001-RNA-006-03F09-A023	2562	ASO_NC_A	NC_A	NC_A	other	Failed QC
600	CNhi10521_AGT	11493673	F6-001-RNA-004-02E03-8E77	2514	ASO_NC_A	NC_A	NC_A	other	Negative Control
601	CNhi10612_GCG	5261363	F6-001-RNA-010-01E03-2E47	2577	ASO_NC_A	NC_A	NC_A	other	Negative Control
602	CNhi10543_ACC	8327165	F6-001-RNA-005-04F09-2229	2515	ASO_NC_A	NC_A	NC_A	other	Negative Control
603	CNhi10831_TAC	11092581	F6-001-RNA-021-02C07-F6F5	2861	ASO_NC_A	NC_A	NC_A	other	Negative Control
604	CNhi10533_AGT	5608971	F6-001-RNA-005-03F03-BD8B	2515	ASO_NC_A	NC_A	NC_A	other	Negative Control
605	CNhi10581_AGT	6751281	F6-001-RNA-006-04E09-18E7	2562	ASO_NC_A	NC_A	NC_A	other	Failed QC
606	CNhi10476_GCG	9788777	F6-001-RNA-002-02F12-E191	2445	ASO_NC_A	NC_A	NC_A	other	Negative Control
607	CNhi10815_ATG	10405592	F6-001-RNA-013-01C01-58FB	2866	ASO_NC_A	NC_A	NC_A	other	Negative Control
608	CNhi10539_ACG	9582894	F6-001-RNA-006-01F03-2EAF	2515	ASO_NC_A	NC_A	NC_A	other	Negative Control
609	CNhi10832_GCG	8118056	F6-001-RNA-019-03G07-4384	2861	ASO_NC_A	NC_A	NC_A	other	Negative Control
610	CNhi10588_GCT	8185587	F6-001-RNA-009-04F12-74DA	2562	ASO_NC_A	NC_A	NC_A	other	Failed QC
611	CNhi10602_CAC	6043590	F6-001-RNA-010-01F12-DDB7	2577	ASO_NC_A	NC_A	NC_A	other	Negative Control
612	CNhi10529_GCG	7242931	F6-001-RNA-004-01E09-470F	2514	ASO_NC_A	NC_A	NC_A	other	Negative Control
613	CNhi10588_CAC	8284990	F6-001-RNA-009-01F12-3C15	2562	ASO_NC_A	NC_A	NC_A	other	Failed QC
614	CNhi10535_ACG	10444068	F6-001-RNA-006-01F09-2E6F	2515	ASO_NC_A	NC_A	NC_A	other	Negative Control
615	CNhi10787_GCT	10342146	F6-001-RNA-016-03G01-A9A5	2860	ASO_NC_A	NC_A	NC_A	other	Negative Control
616	CNhi10789_GCT	13861045	F6-001-RNA-015-02G01-1FC6	2860	ASO_NC_A	NC_A	NC_A	other	Negative Control
617	CNhi10588_GCG	6307174	F6-001-RNA-009-02F12-890C	2562	ASO_NC_A	NC_A	NC_A	other	Failed QC
618	CNhi10836_ACG	6697053	F6-001-RNA-018-01C07-ACC6	2861	ASO_NC_A	NC_A	NC_A	other	Negative Control
619	CNhi10474_ATG	12011500	F6-001-RNA-002-03E09-1D69	2445	ASO_NC_A	NC_A	NC_A	other	Negative Control
620	CNhi10526_AGT	14632525	F6-001-RNA-005-01E03-D877	2514	ASO_NC_A	NC_A	NC_A	other	Negative Control
621	CNhi10531_GCT	7579181	F6-001-RNA-005-02E03-739F	2514	ASO_NC_A	NC_A	NC_A	other	Negative Control
622	CNhi10836_ACC	13909398	F6-001-RNA-019-04C01-1195	2861	ASO_NC_A	NC_A	NC_A	other	Negative Control
623	CNhi10831_ACC	11087285	F6-001-RNA-021-05C01-8C27	2861	ASO_NC_A	NC_A	NC_A	other	Negative Control
624	CNhi10542_CAC	7334437	F6-001-RNA-006-01E09-DAC4	2515	ASO_NC_A	NC_A	NC_A	other	Negative Control
625	CNhi10602_AGT	6567348	F6-001-RNA-010-02F12-8CEA	2577	ASO_NC_A	NC_A	NC_A	other	Negative Control
626	CNhi10804_ACC	7569674	F6-001-RNA-019-04G01-AC88	2861	ASO_NC_A	NC_A	NC_A	other	Negative Control
627	CNhi10766_ATG	13329349	F6-001-RNA-014-04G07-2919	2817	ASO_NC_A	NC_A	NC_A	other	Negative Control
628	CNhi10766_GCG	9633890	F6-001-RNA-014-03C07-C309	2817	ASO_NC_A	NC_A	NC_A	other	Negative Control
629	CNhi10538_TAC	9352031	F6-001-RNA-006-02F03-D9BF	2515	ASO_NC_A	NC_A	NC_A	other	Negative Control
630	CNhi10837_AGT	8255580	F6-001-RNA-021-02G07-22F8	2861	ASO_NC_A	NC_A	NC_A	other	Negative Control
631	CNhi10588_ACG	8076026	F6-001-RNA-009-04E03-22C1	2562	ASO_NC_A	NC_A	NC_A	other	Failed QC
632	CNhi10540_ACG	7075153	F6-001-RNA-006-02E09-FA26	2515	ASO_NC_A	NC_A	NC_A	other	Negative Control
633	CNhi10486_ACG	8107452	F6-001-RNA-003-04E03-FFF3	2458	ASO_NC_A	NC_A	NC_A	other	Negative Control
634	CNhi10607_ACC	11170424	F6-001-RNA-011-02F09-EDA1	2577	ASO_NC_A	NC_A	NC_A	other	Negative Control
635	CNhi10497_TAC	9873963	F6-001-RNA-003-01E09-21E9	2458	ASO_NC_A	NC_A	NC_A	other	Negative Control
636	CNhi10766_CAC	11854173	F6-001-RNA-013-02C07-72BC	2817	ASO_NC_A	NC_A	NC_A	other	Negative Control
637	CNhi10784_ACC	16558705	F6-001-RNA-016-03G07-5E12	2860	ASO_NC_A	NC_A	NC_A	other	Negative Control
638	CNhi10786_ACG	14509997	F6-001-RNA-015-02C01-DE66	2860	ASO_NC_A	NC_A	NC_A	other	Negative Control
639	CNhi10635_ACG	8484691	F6-001-RNA-012-02E06-AD33	2601	ASO_NC_A	NC_A	NC_A	other	Negative Control
640	CNhi10784_ATG	16353862	F6-001-RNA-016-03G04-1D98	2860	ASO_NC_B	NC_B	NC_B	other	Negative Control
641	CNhi10759_CAC	12318545	F6-001-RNA-014-03C04-0838	2817	ASO_NC_B	NC_B	NC_B	other	Negative Control
642	CNhi10789_ATG	18328262	F6-001-RNA-015-02G04-B77E	2860	ASO_NC_B	NC_B	NC_B	other	Negative Control
643	CNhi10789_TAC	14387455	F6-001-RNA-017-05G04-8A13	2860	ASO_NC_B	NC_B	NC_B	other	Negative Control
644	CNhi10803_TAC	9918658	F6-001-RNA-018-01C04-F8F3	2861	ASO_NC_B	NC_B	NC_B	other	Negative Control
645	CNhi10792_ACG	10478173	F6-001-RNA-015-01G04-5F4C	2860	ASO_NC_B	NC_B	NC_B	other	Negative Control
646	CNhi10810_GCT	9608413	F6-001-RNA-020-01C04-F567	2866	ASO_NC_B	NC_B	NC_B	other	Negative Control
647	CNhi10793_GCG	8826348	F6-001-RNA-016-04G04-2E90	2860	ASO_NC_B	NC_B	NC_B	other	Negative Control
648	CNhi10831_CAC	8431546	F6-001-RNA-019-03G10-BEEE	2861	ASO_NC_B	NC_B	NC_B	other	Negative Control
649	CNhi10830_CAC	8602058	F6-001-RNA-021-05C04-071C	2861	ASO_NC_B	NC_B	NC_B	other	Negative Control
650	CNhi10789_CAC	10900778	F6-001-RNA-016-04C04-7662	2860	ASO_NC_B	NC_B	NC_B	other	Negative Control
651	CNhi10816_CAC	10538450	F6-001-RNA-013-02C04-0AB6	2866	ASO_NC_B	NC_B	NC_B	other	Negative Control
652	CNhi10763_GCT	9472135	F6-001-RNA-014-03G10-DECC	2817	ASO_NC_B	NC_B	NC_B	other	Negative Control
653	CNhi10832_ACG	11190074	F6-001-RNA-019-04G04-30AC	2861	ASO_NC_B	NC_B	NC_B	other	Negative Control
654	CNhi10763_GCG	8888202	F6-001-RNA-014-04G10-0CED	2817	ASO_NC_B	NC_B	NC_B	other	Negative Control
655	CNhi10765_CAC	11075161	F6-001-RNA-017-05C04-76FE	2817	ASO_NC_B	NC_B	NC_B	other	Negative Control
656	CNhi10817_ACG	13074921	F6-001-RNA-013-01C04-2BEA	2866	ASO_NC_B	NC_B	NC_B	other	Negative Control
657	CNhi10793_ACG	14956961	F6-001-RNA-015-02C04-C4DD	2860	ASO_NC_B	NC_B	NC_B	other	Negative Control
658	CNhi10813_ACC	11643494	F6-001-RNA-020-01G04-E731	2866	ASO_NC_B	NC_B	NC_B	other	Negative Control
659	CNhi10835_GCG	6638364	F6-001-RNA-019-04C04-5ECC	2861	ASO_NC_B	NC_B	NC_B	other	Negative Control
660	CNhi10832_ACC	12911918	F6-001-RNA-019-03G04-E974	2861	ASO_NC_B	NC_B	NC_B	other	Negative Control
661	CNhi10761_CAC	9714088	F6-001-RNA-014-04C04-2511	2817	ASO_NC_B	NC_B	NC_B	other	Negative Control
662	CNhi10760_ACC	14771550	F6-001-RNA-013-02G04-9255	2817	ASO_NC_B	NC_B	NC_B	other	Negative Control
663	CNhi10762_TAC	17388307	F6-001-RNA-013-01G04-4F5C	2817	ASO_NC_B	NC_B	NC_B	other	Negative Control
664	CNhi10817_ATG	8288263	F6-001-RNA-021-03C10-A98D	2866	ASO_NC_B	NC_B	NC_B	other	Negative Control
665	CNhi10801_CAC	6853878	F6-001-RNA-018-01C10-FDF8	2861	ASO_NC_B	NC_B	NC_B	other	Negative Control
666	CNhi10835_ATG	7871916	F6-001-RNA-021-02G10-B1CF	2861	ASO_NC_B	NC_B	NC_B	other	Negative Control
667	CNhi10763_ACG	10104605	F6-001-RNA-013-01C10-7EBC	2817	ASO_NC_B	NC_B	NC_B	other	Negative Control
668	CNhi10804_AGT	10025183	F6-001-RNA-021-02C10-4822	2861	ASO_NC_B	NC_B	NC_B	other	Negative Control
669	CNhi10805_TAC	9632734	F6-001-RNA-019-03C10-F875	2861	ASO_NC_B	NC_B	NC_B	other	Negative Control
670	CNhi10782_AGT	14353258	F6-001-RNA-015-01C10-BA84	2860	ASO_NC_B	NC_B	NC_B	other	Negative Control
671	CNhi10467_ATG	12774988	F6-001-RNA-002-03A10-ED03	2445	ASO_NEAT1_1	NEAT1_1	ENSG00000245532	lncRNA_intergenic	Positive Control
672	CNhi10471_AGT	15859632	F6-001-RNA-002-03B10-3579	2445	ASO_NEAT1_1	NEAT1_1	ENSG00000245532	lncRNA_intergenic	Positive Control
673	CNhi10470_CAC	9619892	F6-001-RNA-002-03D11-CEA1	2445	ASO_NEAT1_2	NEAT1_2	ENSG00000245532	lncRNA_intergenic	Positive Control
674	CNhi10474_GCG	8923522	F6-001-RNA-002-03C11-557C	2445	ASO_NEAT1_2	NEAT1_2	ENSG00000245532	lncRNA_intergenic	Positive Control
675	CNhi10836_TAC	11647344	F6-001-RNA-019-04D12-382C	2861	ASO_G0248092_AD_10	NNT-AS1	ENSG00000248092	lncRNA_divergent	Targeted lncRNA
676	CNhi10801_AGT	8964107	F6-001-RNA-019-04C12-41DA	2861	ASO_G0248092_AD_10	NNT-AS1	ENSG00000248092	lncRNA_divergent	Targeted lncRNA
677	CNhi10837_ATG	14547585	F6-001-RNA-019-03D12-71E6	2861	ASO_G0237187_AD_08	NR2F1-AS1	ENSG00000237187	lncRNA_divergent	Targeted lncRNA
678	CNhi10609_ACG	7685419	F6-001-RNA-010-03G04-988A	2577	ASO_G0237187_01	NR2F1-AS1	ENSG00000237187	lncRNA_divergent	Targeted lncRNA
679	CNhi10610_AGT	8443787	F6-001-RNA-010-03E04-2A2A	2577	ASO_G0237187_03	NR2F1-AS1	ENSG00000237187	lncRNA_divergent	Targeted lncRNA
680	CNhi10836_CAC	9131822	F6-001-RNA-019-03A10-5DB6	2861	ASO_G0237187_AD_01	NR2F1-AS1	ENSG00000237187	lncRNA_divergent	Targeted lncRNA
681	CNhi10834_TAC	15574139	F6-001-RNA-019-03C12-A373	2861	ASO_G0237187_AD_08	NR2F1-AS1	ENSG00000237187	lncRNA_divergent	Targeted lncRNA
682	CNhi10832_AGT	7302525	F6-001-RNA-019-03B10-24EA	2861	ASO_G0237187_AD_01	NR2F1-AS1	ENSG00000237187	lncRNA_divergent	Targeted lncRNA
683	CNhi10607_GCG	7995201	F6-001-RNA-010-03F04-BE52	2577	ASO_G0237187_03	NR2F1-AS1	ENSG00000237187	lncRNA_divergent	Targeted lncRNA
684	CNhi10527_AGT	14117495	F6-001-RNA-004-03B10-6300	2514	ASO_G0228288_01	PCAT6	ENSG00000228288	lncRNA_intergenic	Targeted lncRNA
685	CNhi10522_GCT	13646425	F6-001-RNA-004-03A10-395F	2514	ASO_G0228288_01	PCAT6	ENSG00000228288	lncRNA_intergenic	Targeted lncRNA
686	CNhi10793_AGT	12555388	F6-001-RNA-015-02G02-5DCE	2860	ASO_G0236618_AD_07	PITPNA-AS1	ENSG00000236618	lncRNA_divergent	Targeted lncRNA
687	CNhi10790_ACC	17019278	F6-001-RNA-015-02G03-C11E	2860	ASO_G0236618_AD_09	PITPNA-AS1	ENSG00000236618	lncRNA_divergent	Targeted lncRNA
688	CNhi10791_TAC	16118518	F6-001-RNA-015-02H02-CFA0	2860	ASO_G0236618_AD_07	PITPNA-AS1	ENSG00000236618	lncRNA_divergent	Targeted lncRNA
689	CNhi10578_AGT	10627580	F6-001-RNA-006-03E11-55F6	2562	ASO_G0236618_07	PITPNA-AS1	ENSG00000236618	lncRNA_divergent	Failed QC
690	CNhi10578_GCG	8593743	F6-001-RNA-006-03F11-D078	2562	ASO_G0236618_07	PITPNA-AS1	ENSG00000236618	lncRNA_divergent	Failed QC
691	CNhi10497_GCT	9699329	F6-001-RNA-003-01A10-E985	2458	ASO_G0230082_01	PRRT3-AS1	ENSG00000230082	lncRNA_divergent	Targeted lncRNA
692	CNhi10495_AGT	8564871	F6-001-RNA-003-01B10-39A2	2458	ASO_G0230082_01	PRRT3-AS1	ENSG00000230082	lncRNA_divergent	Targeted lncRNA
693	CNhi10816_TAC	9821420	F6-001-RNA-020-01C03-7D4F	2866	ASO_G0116132_POS_09	PRRX1	ENSG00000116132	coding_mRNA	Positive Control
694	CNhi10818_CAC	6594728	F6-001-RNA-020-01D03-D358	2866	ASO_G0116132_POS_09	PRRX1	ENSG00000116132	coding_mRNA	Positive Control
695	CNhi10635_GCT	9019283	F6-001-RNA-012-01F08-0D12	2601	ASO_G0224597_AD_04	PTCHD3P1	ENSG00000224597	lncRNA_intergenic	Targeted lncRNA
696	CNhi10454_GCT	14281561	F6-001-RNA-001-01E08-E27E	2415	ASO_G0224597_05	PTCHD3P1	ENSG00000224597	lncRNA_intergenic	Targeted lncRNA
697	CNhi10458_AGT	15678497	F6-001-RNA-001-01G09-BF1D	2415	ASO_G0224597_06	PTCHD3P1	ENSG00000224597	lncRNA_intergenic	Targeted lncRNA
698	CNhi10462_GCT	10470428	F6-001-RNA-001-03G09-5A77	2415	ASO_G0224597_06	PTCHD3P1	ENSG00000224597	lncRNA_intergenic	Targeted lncRNA
699	CNhi10454_ACG	11268409	F6-001-RNA-001-03E08-A857	2415	ASO_G0224597_05	PTCHD3P1	ENSG00000224597	lncRNA_intergenic	Targeted lncRNA
700	CNhi10631_CAC	12528707	F6-001-RNA-012-01E08-B518	2601	ASO_G0224597_AD_04	PTCHD3P1	ENSG00000224597	lncRNA_intergenic	Targeted lncRNA
701	CNhi10632_CAC	10564959	F6-001-RNA-012-02G08-2281	2601	ASO_G0246067_AD_06	RAB30-AS1	ENSG00000246067	lncRNA_divergent	Targeted lncRNA
702	CNhi10459_GCT	14291315	F6-001-RNA-001-01H07-5760	2415	ASO_G0246067_01	RAB30-AS1	ENSG00000246067	lncRNA_divergent	Targeted lncRNA
703	CNhi10606_ATG	7930874	F6-001-RNA-011-01D11-A29E	2577	ASO_G0246067_AD_04	RAB30-AS1	ENSG00000246067	lncRNA_divergent	Targeted lncRNA
704	CNhi10639_ACC	8941366	F6-001-RNA-012-02E07-2B52	2601	ASO_G0246067_AD_04	RAB30-AS1	ENSG00000246067	lncRNA_divergent	Targeted lncRNA
705	CNhi10634_AGT	7264008	F6-001-RNA-012-02E08-7003	2601	ASO_G0246067_AD_09	RAB30-AS1	ENSG00000246067	lncRNA_divergent	Targeted lncRNA
706	CNhi10461_AGT	15902448	F6-001-RNA-001-03H07-8C7F	2415	ASO_G0246067_01	RAB30-AS1	ENSG00000246067	lncRNA_divergent	Targeted lncRNA
707	CNhi10633_AGT	10283218	F6-001-RNA-012-02F08-7508	2601	ASO_G0246067_AD_09	RAB30-AS1	ENSG00000246067	lncRNA_divergent	Targeted lncRNA
708	CNhi10457_ATG	12856545	F6-001-RNA-001-03H09-4C69	2415	ASO_G0246067_05	RAB30-AS1	ENSG00000246067	lncRNA_divergent	Targeted lncRNA
709	CNhi10631_GCG	6291669	F6-001-RNA-012-02F07-9F02	2601	ASO_G0246067_AD_04	RAB30-AS1	ENSG00000246067	lncRNA_divergent	Targeted lncRNA
710	CNhi10459_ACG	16217307	F6-001-RNA-001-01H09-C9C3	2415	ASO_G0246067_05	RAB30-AS1	ENSG00000246067	lncRNA_divergent	Targeted lncRNA
711	CNhi10631_ATG	12159018	F6-001-RNA-012-02H08-8583	2601	ASO_G0246067_AD_06	RAB30-AS1	ENSG00000246067	lncRNA_divergent	Targeted lncRNA
712	CNhi10612_ACC	8756015	F6-001-RNA-011-01B11-6357	2577	ASO_G0246067_AD_06	RAB30-AS1	ENSG00000246067	lncRNA_divergent	Targeted lncRNA
713	CNhi10612_AGT	7774591	F6-001-RNA-011-01D12-67DE	2577	ASO_G0246067_AD_09	RAB30-AS1	ENSG00000246067	lncRNA_divergent	Targeted lncRNA
714	CNhi10608_ATG	7646960	F6-001-RNA-011-01A10-67F3	2577	ASO_G0246067_01	RAB30-AS1	ENSG00000246067	lncRNA_divergent	Targeted lncRNA
715	CNhi10766_TAC	14079212	F6-001-RNA-014-03H02-713A	2817	ASO_G0245849_AD_07	RAD51-AS1	ENSG00000245849	lncRNA_divergent	Targeted lncRNA
716	CNhi10761_ATG	16557251	F6-001-RNA-014-03G02-7E2F	2817	ASO_G0245849_AD_07	RAD51-AS1	ENSG00000245849	lncRNA_divergent	Targeted lncRNA
717	CNhi10530_GCT	7845381	F6-001-RNA-004-04G01-F3B4	2514	ASO_G0216775_01	RP1-152L7.5	ENSG00000216775	pseudogene	Targeted lncRNA
718	CNhi10526_CAC	9184750	F6-001-RNA-004-04H02-7F4F	2514	ASO_G0216775_03	RP1-152L7.5	ENSG00000216775	pseudogene	Targeted lncRNA
719	CNhi10531_ACC	8008594	F6-001-RNA-004-04H01-73BE	2514	ASO_G0216775_01	RP1-152L7.5	ENSG00000216775	pseudogene	Targeted lncRNA
720	CNhi10521_ACG	13196182	F6-001-RNA-004-04G02-8786	2514	ASO_G0216775_03	RP1-152L7.5	ENSG00000216775	pseudogene	Targeted lncRNA
721	CNhi10836_AGT	11278497	F6-001-RNA-019-03E06-F7A0	2861	ASO_G0245213_AD_04	RP11-10K16.1	ENSG00000245213	lncRNA_divergent	Targeted lncRNA
722	CNhi10490_AGT	13402990	F6-001-RNA-003-02F08-3F4D	2458	ASO_G0245213_04	RP11-10K16.1	ENSG00000245213	lncRNA_divergent	Targeted lncRNA
723	CNhi10831_ATG	11033231	F6-001-RNA-019-03E05-07E3	2861	ASO_G0245213_AD_03	RP11-10K16.1	ENSG00000245213	lncRNA_divergent	Targeted lncRNA
724	CNhi10497_AGT	9773217	F6-001-RNA-003-02E08-273F	2458	ASO_G0245213_04	RP11-10K16.1	ENSG00000245213	lncRNA_divergent	Targeted lncRNA
725	CNhi10830_ACG	14123285	F6-001-RNA-019-03F06-7359	2861	ASO_G0245213_AD_04	RP11-10K16.1	ENSG00000245213	lncRNA_divergent	Targeted lncRNA
726	CNhi10803_ACC	13996032	F6-001-RNA-019-03F05-4BEC	2861	ASO_G0245213_AD_03	RP11-10K16.1	ENSG00000245213	lncRNA_divergent	Targeted lncRNA
727	CNhi10609_GCG	7199938	F6-001-RNA-010-04D05-283C	2577	ASO_G0255121_02	RP11-110I1.12	ENSG00000255121	lncRNA_divergent	Targeted lncRNA
728	CNhi10609_ATG	7122275	F6-001-RNA-010-04A05-1252	2577	ASO_G0255121_03	RP11-110I1.12	ENSG00000255121	lncRNA_divergent	Targeted lncRNA
729	CNhi10612_CAC	7603119	F6-001-RNA-010-04A06-5C5D	2577	ASO_G0255121_08	RP11-110I1.12	ENSG00000255121	lncRNA_divergent	Targeted lncRNA
730	CNhi10611_GCT	6337562	F6-001-RNA-010-04B06-32EC	2577	ASO_G0255121_08	RP11-110I1.12	ENSG00000255121	lncRNA_divergent	Targeted lncRNA
731	CNhi10608_ACG	8700263	F6-001-RNA-010-04C05-6603	2577	ASO_G0255121_02	RP11-110I1.12	ENSG00000255121	lncRNA_divergent	Targeted lncRNA
732	CNhi10610_CAC	9086760	F6-001-RNA-010-04B05-99A0	2577	ASO_G0255121_03	RP11-110I1.12	ENSG00000255121	lncRNA_divergent	Targeted lncRNA
733	CNhi10472_ATG	20094518	F6-001-RNA-002-04E05-0853	2445	ASO_G0246089_02	RP11-115C21.2	ENSG00000246089	lncRNA_divergent	Targeted lncRNA
734	CNhi10474_TAC	13303260	F6-001-RNA-002-04F05-6AF7	2445	ASO_G0246089_02	RP11-115C21.2	ENSG00000246089	lncRNA_divergent	Targeted lncRNA
735	CNhi10764_AGT	12723954	F6-001-RNA-013-01C11-170E	2817	ASO_G0221817_AD_08	RP11-137L10.6	ENSG00000221817	lncRNA_divergent	Targeted lncRNA
736	CNhi10532_GCG	7095871	F6-001-RNA-004-04A05-BD94	2514	ASO_G0221817_04	RP11-137L10.6	ENSG00000221817	lncRNA_divergent	Targeted lncRNA
737	CNhi10532_GCT	10713387	F6-001-RNA-004-04B05-A7E7	2514	ASO_G0221817_04	RP11-137L10.6	ENSG00000221817	lncRNA_divergent	Targeted lncRNA
738	CNhi10759_ATG	9677851	F6-001-RNA-013-01D11-8282	2817	ASO_G0221817_AD_08	RP11-137L10.6	ENSG00000221817	lncRNA_divergent	Targeted lncRNA
739	CNhi10521_GCG	7654053	F6-001-RNA-004-02A09-8B82	2514	ASO_G0225973_10	RP11-139H15.1	ENSG00000225973	lncRNA_divergent	Targeted lncRNA
740	CNhi10758_GCT	12472688	F6-001-RNA-013-01F04-FA00	2817	ASO_G0225973_AD_01	RP11-139H15.1	ENSG00000225973	lncRNA_divergent	Targeted lncRNA
741	CNhi10526_ACC	9010880	F6-001-RNA-004-02B09-E8E6	2514	ASO_G0225973_10	RP11-139H15.1	ENSG00000225973	lncRNA_divergent	Targeted lncRNA
742	CNhi10760_ATG	17886308	F6-001-RNA-013-01E04-3955	2817	ASO_G0225973_AD_01	RP11-139H15.1	ENSG00000225973	lncRNA_divergent	Targeted lncRNA
743	CNhi10761_GCT	9344836	F6-001-RNA-013-02A05-FE8E	2817	ASO_G0232110_AD_02	RP11-149I23.3	ENSG00000232110	lncRNA_antisense	Targeted lncRNA
744	CNhi10815_GCG	9486568	F6-001-RNA-013-02D06-1E96	2866	ASO_G0232110_AD_06	RP11-149I23.3	ENSG00000232110	lncRNA_antisense	Targeted lncRNA
745	CNhi10811_ATG	15945023	F6-001-RNA-013-02C06-BDCF	2866	ASO_G0232110_AD_06	RP11-149I23.3	ENSG00000232110	lncRNA_antisense	Targeted lncRNA
746	CNhi10580_TAC	6224360	F6-001-RNA-006-04A07-C638	2562	ASO_G0232110_04	RP11-149I23.3	ENSG00000232110	lncRNA_antisense	Failed QC
747	CNhi10580_GCG	5712474	F6-001-RNA-006-04B07-B77B	2562	ASO_G0232110_04	RP11-149I23.3	ENSG00000232110	lncRNA_antisense	Failed QC
748	CNhi10468_GCT	13174438	F6-001-RNA-002-03E08-2F9E	2445	ASO_C013368_02	RP11-150O12.1	ENSG00000253161	lncRNA_intergenic	Targeted lncRNA
749	CNhi10477_TAC	11801668	F6-001-RNA-002-03H09-5D79	2445	ASO_C013368_01	RP11-150O12.1	ENSG00000253161	lncRNA_intergenic	Targeted lncRNA
750	CNhi10472_ACG	10971380	F6-001-RNA-002-03F08-58E8	2445	ASO_C013368_02	RP11-150O12.1	ENSG00000253161	lncRNA_intergenic	Targeted lncRNA
751	CNhi10466_TAC	16743225	F6-001-RNA-002-03G09-B3C1	2445	ASO_C013368_01	RP11-150O12.1	ENSG00000253161	lncRNA_intergenic	Targeted lncRNA
752	CNhi10582_ATG	9515061	F6-001-RNA-009-04H04-920F	2562	ASO_G0261105_02	RP11-173B14.5	ENSG00000261105	lncRNA_divergent	Failed QC
753	CNhi10759_GCG	7830814	F6-001-RNA-014-04F08-E112	2817	ASO_G0261105_AD_05	RP11-173B14.5	ENSG00000261105	lncRNA_divergent	Targeted lncRNA
754	CNhi10763_TAC	16871320	F6-001-RNA-014-04F09-4276	2817	ASO_G0261105_AD_06	RP11-173B14.5	ENSG00000261105	lncRNA_divergent	Targeted lncRNA
755	CNhi10582_GCG	8576714	F6-001-RNA-009-04G04-FF7C	2562	ASO_G0261105_02	RP11-173B14.5	ENSG00000261105	lncRNA_divergent	Failed QC
756	CNhi10759_GCT	11702741	F6-001-RNA-014-04E08-577E	2817	ASO_G0261105_AD_05	RP11-173B14.5	ENSG00000261105	lncRNA_divergent	Targeted lncRNA
757	CNhi10757_GCT	10665551	F6-001-RNA-014-04E09-0726	2817	ASO_G0261105_AD_06	RP11-173B14.5	ENSG00000261105	lncRNA_divergent	Targeted lncRNA
758	CNhi10762_GCG	10414816	F6-001-RNA-014-04H09-6214	2817	ASO_G0261105_AD_10	RP11-173B14.5	ENSG00000261105	lncRNA_divergent	Targeted lncRNA
759	CNhi10759_ACG	14333461	F6-001-RNA-014-04G09-050E	2817	ASO_G0261105_AD_10	RP11-173B14.5	ENSG00000261105	lncRNA_divergent	Targeted lncRNA
760	CNhi10467_AGT	13747780	F6-001-RNA-002-04C11-135E	2445	ASO_G0230074_05	RP11-195F19.9	ENSG00000230074	lncRNA_divergent	Targeted lncRNA
761	CNhi10476_TAC	14570073	F6-001-RNA-002-04D11-C3BA	2445	ASO_G0230074_05	RP11-195F19.9	ENSG00000230074	lncRNA_divergent	Targeted lncRNA
762	CNhi10476_CAC	9695498	F6-001-RNA-002-04B10-E4A4	2445	ASO_G0230074_07	RP11-195F19.9	ENSG00000230074	lncRNA_divergent	Targeted lncRNA
763	CNhi10476_ACC	15606030	F6-001-RNA-002-04A10-4170	2445	ASO_G0230074_07	RP11-195F19.9	ENSG00000230074	lncRNA_divergent	Targeted lncRNA
764	CNhi10535_TAC	12544898	F6-001-RNA-006-01H11-E400	2515	ASO_G0233137_04	RP11-220I1.1	ENSG00000233137	lncRNA_intergenic	Targeted lncRNA
765	CNhi10542_AGT	7893355	F6-001-RNA-006-01G11-BA9F	2515	ASO_G0233137_04	RP11-220I1.1	ENSG00000233137	lncRNA_intergenic	Targeted lncRNA
766	CNhi10544_GCT	5405655	F6-001-RNA-006-01F10-830D	2515	ASO_G0233137_02	RP11-220I1.1	ENSG00000233137	lncRNA_intergenic	Targeted lncRNA
767	CNhi10541_ACG	7939128	F6-001-RNA-006-01F11-C932	2515	ASO_G0233137_05	RP11-220I1.1	ENSG00000233137	lncRNA_intergenic	Targeted lncRNA
768	CNhi10535_CAC	10997968	F6-001-RNA-006-01E11-B813	2515	ASO_G0233137_05	RP11-220I1.1	ENSG00000233137	lncRNA_intergenic	Targeted lncRNA
769	CNhi10544_GCG	5627142	F6-001-RNA-006-01E10-F2E6	2515	ASO_G0233137_02	RP11-220I1.1	ENSG00000233137	lncRNA_intergenic	Targeted lncRNA
770	CNhi10629_CAC	7658910	F6-001-RNA-012-03C06-6E38	2601	ASO_G0256268_AD_06	RP11-221N13.3	ENSG00000256268	lncRNA_intergenic	Targeted lncRNA
771	CNhi10632_GCG	5404714	F6-001-RNA-012-03B06-0BD1	2601	ASO_G0256268_AD_07	RP11-221N13.3	ENSG00000256268	lncRNA_intergenic	Targeted lncRNA
772	CNhi10631_GCT	6609185	F6-001-RNA-012-03A06-CCEB	2601	ASO_G0256268_AD_07	RP11-221N13.3	ENSG00000256268	lncRNA_intergenic	Targeted lncRNA
773	CNhi10638_TAC	7999022	F6-001-RNA-012-03D06-327B	2601	ASO_G0256268_AD_06	RP11-221N13.3	ENSG00000256268	lncRNA_intergenic	Targeted lncRNA
774	CNhi10629_ACG	9686472	F6-001-RNA-012-03D05-B734	2601	ASO_G0256268_AD_03	RP11-221N13.3	ENSG00000256268	lncRNA_intergenic	Targeted lncRNA
775	CNhi10638_GCT	6661531	F6-001-RNA-012-03C05-CBF9	2601	ASO_G0256268_AD_03	RP11-221N13.3	ENSG00000256268	lncRNA_intergenic	Targeted lncRNA
776	CNhi10582_AGT	8713815	F6-001-RNA-009-04H01-60CD	2562	ASO_G0260442_01	RP11-22P6.3	ENSG00000260442	lncRNA_divergent	Failed QC
777	CNhi10582_CAC	9324494	F6-001-RNA-009-04G01-AF16	2562	ASO_G0260442_01	RP11-22P6.3	ENSG00000260442	lncRNA_divergent	Failed QC
778	CNhi10579_GCG	5911466	F6-001-RNA-006-04B01-5EB9	2562	ASO_G0229563_02	RP11-245M24.1	ENSG00000229563	lncRNA_intergenic	Failed QC
779	CNhi10579_ATG	8705733	F6-001-RNA-006-04A01-62C0	2562	ASO_G0229563_02	RP11-245M24.1	ENSG00000229563	lncRNA_intergenic	Failed QC
780	CNhi10579_ACG	6466271	F6-001-RNA-006-04B02-5DFA	2562	ASO_G0229563_04	RP11-245M24.1	ENSG00000229563	lncRNA_intergenic	Failed QC
781	CNhi10579_TAC	8076036	F6-001-RNA-006-04A02-B25D	2562	ASO_G0229563_04	RP11-245M24.1	ENSG00000229563	lncRNA_intergenic	Failed QC
782	CNhi10581_GCT	9209922	F6-001-RNA-009-04D02-5B39	2562	ASO_G0259426_02	RP11-253M7.1	ENSG00000259426	lncRNA_divergent	Failed QC
783	CNhi10582_ACC	11084211	F6-001-RNA-009-04C02-3481	2562	ASO_G0259426_02	RP11-253M7.1	ENSG00000259426	lncRNA_divergent	Failed QC
784	CNhi10762_ACC	11614059	F6-001-RNA-013-02B08-1CAE	2817	ASO_G0233461_AD_03	RP11-295G20.2	ENSG00000233461	lncRNA_divergent	Targeted lncRNA
785	CNhi10758_ACG	15513517	F6-001-RNA-013-02A08-8061	2817	ASO_G0233461_AD_03	RP11-295G20.2	ENSG00000233461	lncRNA_divergent	Targeted lncRNA
786	CNhi10580_ACG	4944673	F6-001-RNA-006-04E10-C233	2562	ASO_G0233461_03	RP11-295G20.2	ENSG00000233461	lncRNA_divergent	Failed QC
787	CNhi10580_GCT	6173450	F6-001-RNA-006-04F10-28E0	2562	ASO_G0233461_03	RP11-295G20.2	ENSG00000233461	lncRNA_divergent	Failed QC
788	CNhi10533_CAC	6393200	F6-001-RNA-005-03A09-5265	2515	ASO_G0203739_10	RP11-296O14.3	ENSG00000203739	lncRNA_divergent	Targeted lncRNA
789	CNhi10535_GCT	13206161	F6-001-RNA-005-03B09-6DDC	2515	ASO_G0203739_10	RP11-296O14.3	ENSG00000203739	lncRNA_divergent	Targeted lncRNA
790	CNhi10811_ACG	15867309	F6-001-RNA-013-01A04-8BD0	2866	ASO_G0203739_AD_03	RP11-296O14.3	ENSG00000203739	lncRNA_divergent	Targeted lncRNA
791	CNhi10811_GCT	9557594	F6-001-RNA-013-01B04-B799	2866	ASO_G0203739_AD_03	RP11-296O14.3	ENSG00000203739	lncRNA_divergent	Targeted lncRNA
792	CNhi10788_AGT	10835986	F6-001-RNA-016-03H03-B687	2860	ASO_G0261879_AD_07	RP11-333E1.1	ENSG00000261879	lncRNA_divergent	Targeted lncRNA
793	CNhi10787_TAC	16652540	F6-001-RNA-016-03G03-F5E5	2860	ASO_G0261879_AD_07	RP11-333E1.1	ENSG00000261879	lncRNA_divergent	Targeted lncRNA
794	CNhi10583_ACG	6342143	F6-001-RNA-009-01H11-974F	2562	ASO_G0261879_05	RP11-333E1.1	ENSG00000261879	lncRNA_divergent	Failed QC
795	CNhi10583_TAC	7154092	F6-001-RNA-009-01G11-18FC	2562	ASO_G0261879_05	RP11-333E1.1	ENSG00000261879	lncRNA_divergent	Failed QC
796	CNhi10805_ACG	9344105	F6-001-RNA-019-04C03-D5C2	2861	ASO_G0245958_AD_07	RP11-33B1.1	ENSG00000245958	pseudogene	Targeted lncRNA
797	CNhi10804_CAC	6870832	F6-001-RNA-019-04D03-17D2	2861	ASO_G0245958_AD_07	RP11-33B1.1	ENSG00000245958	pseudogene	Targeted lncRNA
798	CNhi10837_GCT	4658742	F6-001-RNA-019-04A03-38B0	2861	ASO_G0245958_AD_04	RP11-33B1.1	ENSG00000245958	pseudogene	Targeted lncRNA
799	CNhi10831_AGT	8901355	F6-001-RNA-019-04B03-F1FE	2861	ASO_G0245958_AD_04	RP11-33B1.1	ENSG00000245958	pseudogene	Targeted lncRNA
800	CNhi10577_AGT	8128418	F6-001-RNA-006-03C05-FD05	2562	ASO_G0235437_06	RP11-357C3.3	ENSG00000235437	lncRNA_intergenic	Failed QC
801	CNhi10577_GCG	9217872	F6-001-RNA-006-03D05-95D7	2562	ASO_G0235437_06	RP11-357C3.3	ENSG00000235437	lncRNA_intergenic	Failed QC
802	CNhi10577_CAC	9620568	F6-001-RNA-006-03A04-19AB	2562	ASO_G0235437_05	RP11-357C3.3	ENSG00000235437	lncRNA_intergenic	Failed QC
803	CNhi10577_ACC	5854823	F6-001-RNA-006-03B04-1C21	2562	ASO_G0235437_05	RP11-357C3.3	ENSG00000235437	lncRNA_intergenic	Failed QC
804	CNhi10577_ATG	8765013	F6-001-RNA-006-03A06-977D	2562	ASO_G0235437_09	RP11-357C3.3	ENSG00000235437	lncRNA_intergenic	Failed QC
805	CNhi10577_TAC	10416570	F6-001-RNA-006-03B06-BAE2	2562	ASO_G0235437_09	RP11-357C3.3	ENSG00000235437	lncRNA_intergenic	Failed QC
806	CNhi10604_ACG	10884719	F6-001-RNA-010-01C09-7FAE	2577	ASO_G0271122_05	RP11-379H18.1	ENSG00000271122	lncRNA_divergent	Targeted lncRNA
807	CNhi10610_ACC	7094369	F6-001-RNA-010-01A09-065A	2577	ASO_G0271122_06	RP11-379H18.1	ENSG00000271122	lncRNA_divergent	Targeted lncRNA
808	CNhi10602_ACG	7758109	F6-001-RNA-010-01B09-5CD1	2577	ASO_G0271122_06	RP11-379H18.1	ENSG00000271122	lncRNA_divergent	Targeted lncRNA
809	CNhi10612_GCT	8432784	F6-001-RNA-010-01D09-1578	2577	ASO_G0271122_05	RP11-379H18.1	ENSG00000271122	lncRNA_divergent	Targeted lncRNA
810	CNhi10488_ATG	12939861	F6-001-RNA-003-04F11-A8A6	2458	ASO_G0231187_07	RP11-38L15.3	ENSG00000231187	lncRNA_antisense	Targeted lncRNA
811	CNhi10496_GCT	10058938	F6-001-RNA-003-04E11-0F02	2458	ASO_G0231187_07	RP11-38L15.3	ENSG00000231187	lncRNA_antisense	Targeted lncRNA
812	CNhi10492_ACC	9904654	F6-001-RNA-003-04F10-A3D7	2458	ASO_G0231187_02	RP11-38L15.3	ENSG00000231187	lncRNA_antisense	Targeted lncRNA
813	CNhi10487_GCT	10096840	F6-001-RNA-003-04E10-6DCE	2458	ASO_G0231187_02	RP11-38L15.3	ENSG00000231187	lncRNA_antisense	Targeted lncRNA
814	CNhi10531_ACG	9021062	F6-001-RNA-004-03D05-FEC6	2514	ASO_G0227053_03	RP11-395B7.4	ENSG00000227053	lncRNA_divergent	Targeted lncRNA
815	CNhi10532_ACC	9258188	F6-001-RNA-004-03B05-F833	2514	ASO_G0227053_04	RP11-395B7.4	ENSG00000227053	lncRNA_divergent	Targeted lncRNA
816	CNhi10524_GCG	9215819	F6-001-RNA-004-03C05-3019	2514	ASO_G0227053_03	RP11-395B7.4	ENSG00000227053	lncRNA_divergent	Targeted lncRNA
817	CNhi10527_GCG	9279232	F6-001-RNA-004-03A05-EE2E	2514	ASO_G0227053_04	RP11-395B7.4	ENSG00000227053	lncRNA_divergent	Targeted lncRNA
818	CNhi10467_CAC	10720134	F6-001-RNA-002-04E10-3113	2445	ASO_G0229852_05	RP11-398K22.12	ENSG00000229852	lncRNA_divergent	Targeted lncRNA
819	CNhi10475_GCT	15498061	F6-001-RNA-002-04E11-9136	2445	ASO_G0229852_03	RP11-398K22.12	ENSG00000229852	lncRNA_divergent	Targeted lncRNA
820	CNhi10472_TAC	17102849	F6-001-RNA-002-04F10-BC65	2445	ASO_G0229852_05	RP11-398K22.12	ENSG00000229852	lncRNA_divergent	Targeted lncRNA
821	CNhi10830_ACC	12333924	F6-001-RNA-021-02F07-3E25	2861	ASO_G0229852_AD_01	RP11-398K22.12	ENSG00000229852	lncRNA_divergent	Targeted lncRNA
822	CNhi10837_ACG	8444890	F6-001-RNA-021-02E07-9558	2861	ASO_G0229852_AD_01	RP11-398K22.12	ENSG00000229852	lncRNA_divergent	Targeted lncRNA
823	CNhi10475_ATG	14884874	F6-001-RNA-002-04F11-29E6	2445	ASO_G0229852_03	RP11-398K22.12	ENSG00000229852	lncRNA_divergent	Targeted lncRNA
824	CNhi10459_GCG	8020486	F6-001-RNA-001-02H04-0B6F	2415	ASO_G0223485_01	RP11-417E7.1	ENSG00000223485	lncRNA_intergenic	Targeted lncRNA
825	CNhi10454_GCG	10997344	F6-001-RNA-001-04H04-05E0	2415	ASO_G0223485_01	RP11-417E7.1	ENSG00000223485	lncRNA_intergenic	Targeted lncRNA
826	CNhi10629_AGT	5205337	F6-001-RNA-012-04F04-C958	2601	ASO_G0223485_AD_04	RP11-417E7.1	ENSG00000223485	lncRNA_intergenic	Targeted lncRNA
827	CNhi10630_GCG	5693584	F6-001-RNA-012-04G05-CCEA	2601	ASO_G0223485_AD_06	RP11-417E7.1	ENSG00000223485	lncRNA_intergenic	Targeted lncRNA
828	CNhi10629_ATG	7304573	F6-001-RNA-012-04H05-4AF8	2601	ASO_G0223485_AD_06	RP11-417E7.1	ENSG00000223485	lncRNA_intergenic	Targeted lncRNA
829	CNhi10630_AGT	6981896	F6-001-RNA-012-04E04-E82E	2601	ASO_G0223485_AD_04	RP11-417E7.1	ENSG00000223485	lncRNA_intergenic	Targeted lncRNA
830	CNhi10536_ACC	7409775	F6-001-RNA-006-02G02-4103	2515	ASO_G0233621_05	RP11-422J8.1	ENSG00000233621	lncRNA_divergent	Targeted lncRNA
831	CNhi10541_TAC	9498190	F6-001-RNA-006-02H01-E4CF	2515	ASO_G0233621_01	RP11-422J8.1	ENSG00000233621	lncRNA_divergent	Targeted lncRNA
832	CNhi10537_GCT	10678811	F6-001-RNA-006-02H02-C81E	2515	ASO_G0233621_05	RP11-422J8.1	ENSG00000233621	lncRNA_divergent	Targeted lncRNA
833	CNhi10544_ACG	8741308	F6-001-RNA-006-02G01-41F9	2515	ASO_G0233621_01	RP11-422J8.1	ENSG00000233621	lncRNA_divergent	Targeted lncRNA
834	CNhi10469_GCT	14541907	F6-001-RNA-002-04C09-0E8B	2445	ASO_G0233396_02	RP11-458D21.1	ENSG00000233396	lncRNA_intergenic	Targeted lncRNA
835	CNhi10477_ACC	15071982	F6-001-RNA-002-04D09-7C2D	2445	ASO_G0233396_02	RP11-458D21.1	ENSG00000233396	lncRNA_intergenic	Targeted lncRNA
836	CNhi10467_ACC	11971228	F6-001-RNA-002-04D08-32E5	2445	ASO_G0233396_07	RP11-458D21.1	ENSG00000233396	lncRNA_intergenic	Targeted lncRNA
837	CNhi10466_ATG	14149117	F6-001-RNA-002-04C08-C987	2445	ASO_G0233396_07	RP11-458D21.1	ENSG00000233396	lncRNA_intergenic	Targeted lncRNA
838	CNhi10477_ATG	14255534	F6-001-RNA-002-04F02-B840	2445	ASO_G0263072_02	RP11-473M20.14	ENSG00000263072	lncRNA_divergent	Targeted lncRNA
839	CNhi10472_GCT	13207356	F6-001-RNA-002-04H03-2FFC	2445	ASO_G0263072_01	RP11-473M20.14	ENSG00000263072	lncRNA_divergent	Targeted lncRNA
840	CNhi10468_CAC	10742418	F6-001-RNA-002-04F01-CD21	2445	ASO_G0263072_05	RP11-473M20.14	ENSG00000263072	lncRNA_divergent	Targeted lncRNA
841	CNhi10468_AGT	14642340	F6-001-RNA-002-04G03-35A3	2445	ASO_G0263072_01	RP11-473M20.14	ENSG00000263072	lncRNA_divergent	Targeted lncRNA
842	CNhi10472_CAC	10265163	F6-001-RNA-002-04E01-220A	2445	ASO_G0263072_05	RP11-473M20.14	ENSG00000263072	lncRNA_divergent	Targeted lncRNA
843	CNhi10470_GCG	9799892	F6-001-RNA-002-04H01-ECAB	2445	ASO_G0263072_06	RP11-473M20.14	ENSG00000263072	lncRNA_divergent	Targeted lncRNA
844	CNhi10473_GCT	12950971	F6-001-RNA-002-04E02-F09C	2445	ASO_G0263072_02	RP11-473M20.14	ENSG00000263072	lncRNA_divergent	Targeted lncRNA
845	CNhi10475_ACG	14856850	F6-001-RNA-002-04G01-4CBA	2445	ASO_G0263072_06	RP11-473M20.14	ENSG00000263072	lncRNA_divergent	Targeted lncRNA
846	CNhi10610_TAC	9600170	F6-001-RNA-010-04H07-F688	2577	ASO_G0257642_01	RP11-474B16.1	ENSG00000257642	lncRNA_divergent	Targeted lncRNA
847	CNhi10601_CAC	7572969	F6-001-RNA-010-04G07-110E	2577	ASO_G0257642_01	RP11-474B16.1	ENSG00000257642	lncRNA_divergent	Targeted lncRNA
848	CNhi10525_GCT	12871982	F6-001-RNA-005-01G10-3EB1	2514	ASO_C0019316_01	RP11-474P2.4	ENSG00000257496	lncRNA_intergenic	Targeted lncRNA
849	CNhi10525_ACC	12187963	F6-001-RNA-005-01H10-8D44	2514	ASO_C0019316_01	RP11-474P2.4	ENSG00000257496	lncRNA_intergenic	Targeted lncRNA
850	CNhi10525_CAC	9666020	F6-001-RNA-005-01G12-DBDC	2514	ASO_C0019316_08	RP11-474P2.4	ENSG00000257496	lncRNA_intergenic	Targeted lncRNA
851	CNhi10525_ATG	11670045	F6-001-RNA-005-01H12-3671	2514	ASO_C0019316_08	RP11-474P2.4	ENSG00000257496	lncRNA_intergenic	Targeted lncRNA
852	CNhi10489_TAC	13422727	F6-001-RNA-003-03F11-4CD8	2458	ASO_G0272269_06	RP11-500C11.3	ENSG00000272269	lncRNA_divergent	Targeted lncRNA
853	CNhi10489_ACC	12771191	F6-001-RNA-003-03E11-5CCB	2458	ASO_G0272269_06	RP11-500C11.3	ENSG00000272269	lncRNA_divergent	Targeted lncRNA
854	CNhi10526_GCT	14693867	F6-001-RNA-004-02F04-8A6B	2514	ASO_G0225554_02	RP11-527D7.1	ENSG00000225554	lncRNA_intergenic	Targeted lncRNA
855	CNhi10760_AGT	13468674	F6-001-RNA-013-01E03-5D0C	2817	ASO_G0225554_AD_04	RP11-527D7.1	ENSG00000225554	lncRNA_intergenic	Targeted lncRNA
856	CNhi10758_TAC	17759793	F6-001-RNA-013-01F03-9356	2817	ASO_G0225554_AD_04	RP11-527D7.1	ENSG00000225554	lncRNA_intergenic	Targeted lncRNA
857	CNhi10812_CAC	9589570	F6-001-RNA-021-03A07-37DC	2866	ASO_G0225554_AD_06	RP11-527D7.1	ENSG00000225554	lncRNA_intergenic	Targeted lncRNA
858	CNhi10816_AGT	9864901	F6-001-RNA-021-03B07-200F	2866	ASO_G0225554_AD_06	RP11-527D7.1	ENSG00000225554	lncRNA_intergenic	Targeted lncRNA
859	CNhi10525_TAC	11461267	F6-001-RNA-004-02E04-AD94	2514	ASO_G0225554_02	RP11-527D7.1	ENSG00000225554	lncRNA_intergenic	Targeted lncRNA
860	CNhi10765_GCG	8667619	F6-001-RNA-013-01H03-0D62	2817	ASO_G0225554_AD_06	RP11-527D7.1	ENSG00000225554	lncRNA_intergenic	Targeted lncRNA
861	CNhi10835_TAC	15096507	F6-001-RNA-019-04E06-078B	2861	ASO_G0251580_AD_05	RP11-539L10.3	ENSG00000251580	lncRNA_divergent	Targeted lncRNA
862	CNhi10831_ACG	10918538	F6-001-RNA-019-04F04-23F3	2861	ASO_G0251580_AD_01	RP11-539L10.3	ENSG00000251580	lncRNA_divergent	Targeted lncRNA
863	CNhi10833_AGT	8635234	F6-001-RNA-019-04E04-E19A	2861	ASO_G0251580_AD_01	RP11-539L10.3	ENSG00000251580	lncRNA_divergent	Targeted lncRNA
864	CNhi10805_CAC	6828763	F6-001-RNA-019-04F06-881A	2861	ASO_G0251580_AD_05	RP11-539L10.3	ENSG00000251580	lncRNA_divergent	Targeted lncRNA
865	CNhi10528_AGT	8323075	F6-001-RNA-004-01A08-23E1	2514	ASO_G0223478_03	RP11-545E17.3	ENSG00000223478	lncRNA_divergent	Targeted lncRNA
866	CNhi10532_AGT	8058349	F6-001-RNA-004-01B08-E0ED	2514	ASO_G0223478_03	RP11-545E17.3	ENSG00000223478	lncRNA_divergent	Targeted lncRNA
867	CNhi10761_AGT	14395735	F6-001-RNA-014-04C06-844A	2817	ASO_G0257219_AD_10	RP11-54A9.1	ENSG00000257219	lncRNA_intergenic	Targeted lncRNA
868	CNhi10763_ATG	13867200	F6-001-RNA-014-04B06-2158	2817	ASO_G0257219_AD_05	RP11-54A9.1	ENSG00000257219	lncRNA_intergenic	Targeted lncRNA
869	CNhi10610_GCT	8111312	F6-001-RNA-010-04E05-D142	2577	ASO_G0257219_09	RP11-54A9.1	ENSG00000257219	lncRNA_intergenic	Targeted lncRNA
870	CNhi10763_AGT	12525752	F6-001-RNA-014-04D06-6A40	2817	ASO_G0257219_AD_10	RP11-54A9.1	ENSG00000257219	lncRNA_intergenic	Targeted lncRNA
871	CNhi10765_ACC	11967479	F6-001-RNA-014-04A06-BD7C	2817	ASO_G0257219_AD_05	RP11-54A9.1	ENSG00000257219	lncRNA_intergenic	Targeted lncRNA
872	CNhi10601_ACG	8125270	F6-001-RNA-010-04F05-9934	2577	ASO_G0257219_09	RP11-54A9.1	ENSG00000257219	lncRNA_intergenic	Targeted lncRNA
873	CNhi10583_CAC	8495753	F6-001-RNA-009-04D08-420E	2562	ASO_G0261573_02	RP11-553K8.5	ENSG00000261573	lncRNA_antisense	Failed QC
874	CNhi10583_ATG	7324737	F6-001-RNA-009-04B08-38A2	2562	ASO_G0261573_03	RP11-553K8.5	ENSG00000261573	lncRNA_antisense	Failed QC
875	CNhi10583_ACC	6706148	F6-001-RNA-009-04A07-F9EF	2562	ASO_G0261573_01	RP11-553K8.5	ENSG00000261573	lncRNA_antisense	Failed QC
876	CNhi10766_AGT	11476256	F6-001-RNA-014-04E12-FEA2	2817	ASO_G0261573_AD_04	RP11-553K8.5	ENSG00000261573	lncRNA_antisense	Targeted lncRNA
877	CNhi10760_ACG	12461573	F6-001-RNA-014-04H12-6237	2817	ASO_G0261573_AD_06	RP11-553K8.5	ENSG00000261573	lncRNA_antisense	Targeted lncRNA
878	CNhi10765_ACG	10466361	F6-001-RNA-014-04G12-AEAE	2817	ASO_G0261573_AD_06	RP11-553K8.5	ENSG00000261573	lncRNA_antisense	Targeted lncRNA
879	CNhi10583_GCG	8756412	F6-001-RNA-009-04A08-EB61	2562	ASO_G0261573_03	RP11-553K8.5	ENSG00000261573	lncRNA_antisense	Failed QC
880	CNhi10583_AGT	15789368	F6-001-RNA-009-04C08-CBA1	2562	ASO_G0261573_02	RP11-553K8.5	ENSG00000261573	lncRNA_antisense	Failed QC
881	CNhi10582_GCT	8511753	F6-001-RNA-009-04B07-B694	2562	ASO_G0261573_01	RP11-553K8.5	ENSG00000261573	lncRNA_antisense	Failed QC
882	CNhi10757_ACG	15311705	F6-001-RNA-017-05A05-A3A4	2817	ASO_G0257815_AD_03	RP11-611E13.2	ENSG00000257815	lncRNA_divergent	Targeted lncRNA
883	CNhi10470_AGT	11401557	F6-001-RNA-002-01A06-BEED	2445	ASO_G0257815_01	RP11-611E13.2	ENSG00000257815	lncRNA_divergent	Targeted lncRNA
884	CNhi10767_CAC	13882613	F6-001-RNA-017-05B05-DCF8	2817	ASO_G0257815_AD_03	RP11-611E13.2	ENSG00000257815	lncRNA_divergent	Targeted lncRNA
885	CNhi10473_ATG	15165186	F6-001-RNA-002-01B06-D31E	2445	ASO_G0257815_01	RP11-611E13.2	ENSG00000257815	lncRNA_divergent	Targeted lncRNA
886	CNhi10541_AGT	9592855	F6-001-RNA-005-03G08-7016	2515	ASO_G0204272_04	RP11-622K12.1	ENSG00000204272	lncRNA_intergenic	Targeted lncRNA
887	CNhi10541_ATG	7812601	F6-001-RNA-005-03E07-242A	2515	ASO_G0204272_03	RP11-622K12.1	ENSG00000204272	lncRNA_intergenic	Targeted lncRNA
888	CNhi10540_CAC	6972110	F6-001-RNA-005-03H08-5700	2515	ASO_G0204272_04	RP11-622K12.1	ENSG00000204272	lncRNA_intergenic	Targeted lncRNA
889	CNhi10541_GCG	7989678	F6-001-RNA-005-03F07-B474	2515	ASO_G0204272_03	RP11-622K12.1	ENSG00000204272	lncRNA_intergenic	Targeted lncRNA
890	CNhi10468_ACC	14195566	F6-001-RNA-002-01F07-8AED	2445	ASO_G0233901_05	RP11-65J3.1	ENSG00000233901	lncRNA_intergenic	Targeted lncRNA
891	CNhi10466_GCG	8901167	F6-001-RNA-002-01E07-AA80	2445	ASO_G0233901_05	RP11-65J3.1	ENSG00000233901	lncRNA_intergenic	Targeted lncRNA
892	CNhi10475_TAC	16088415	F6-001-RNA-002-01G09-58BC	2445	ASO_G0233901_02	RP11-65J3.1	ENSG00000233901	lncRNA_intergenic	Targeted lncRNA
893	CNhi10477_GCG	9660367	F6-001-RNA-002-01H09-109A	2445	ASO_G0233901_02	RP11-65J3.1	ENSG00000233901	lncRNA_intergenic	Targeted lncRNA
894	CNhi10468_ATG	13640692	F6-001-RNA-002-01G08-B4F6	2445	ASO_G0233901_04	RP11-65J3.1	ENSG00000233901	lncRNA_intergenic	Targeted lncRNA
895	CNhi10476_ATG	12068562	F6-001-RNA-002-01H08-19C3	2445	ASO_G0233901_04	RP11-65J3.1	ENSG00000233901	lncRNA_intergenic	Targeted lncRNA
896	CNhi10606_TAC	7372947	F6-001-RNA-010-04H01-E139	2577	ASO_G0254682_02	RP11-660L16.2	ENSG00000254682	lncRNA_divergent	Targeted lncRNA
897	CNhi10606_GCG	7553458	F6-001-RNA-010-04G01-09DD	2577	ASO_G0254682_02	RP11-660L16.2	ENSG00000254682	lncRNA_divergent	Targeted lncRNA
898	CNhi10607_ACG	11095563	F6-001-RNA-010-04F02-988E	2577	ASO_G0254682_06	RP11-660L16.2	ENSG00000254682	lncRNA_divergent	Targeted lncRNA
899	CNhi10606_ACG	10180818	F6-001-RNA-010-04E02-6DB4	2577	ASO_G0254682_06	RP11-660L16.2	ENSG00000254682	lncRNA_divergent	Targeted lncRNA
900	CNhi10577_ACG	7465824	F6-001-RNA-006-03G04-87B3	2562	ASO_G0235505_01	RP11-693N9.2	ENSG00000235505	pseudogene	Failed QC
901	CNhi10577_GCT	8399957	F6-001-RNA-006-03H04-0C39	2562	ASO_G0235505_01	RP11-693N9.2	ENSG00000235505	pseudogene	Failed QC
902	CNhi10585_ACC	9317021	F6-001-RNA-009-02B08-7BD3	2562	ASO_G0264920_06	RP11-6N17.4	ENSG00000264920	lncRNA_divergent	Failed QC
903	CNhi10584_GCT	8163375	F6-001-RNA-009-02A08-8B2A	2562	ASO_G0264920_06	RP11-6N17.4	ENSG00000264920	lncRNA_divergent	Failed QC
904	CNhi10791_AGT	7632467	F6-001-RNA-016-04B01-607F	2860	ASO_G0264920_AD_02	RP11-6N17.4	ENSG00000264920	lncRNA_divergent	Targeted lncRNA
905	CNhi10791_ACC	11035031	F6-001-RNA-016-04A01-2ED7	2860	ASO_G0264920_AD_02	RP11-6N17.4	ENSG00000264920	lncRNA_divergent	Targeted lncRNA
906	CNhi10629_GCT	9655862	F6-001-RNA-012-02B11-B756	2601	ASO_G0250742_AD_04	RP11-834C11.4	ENSG00000250742	lncRNA_intergenic	Targeted lncRNA
907	CNhi10631_ACC	10205119	F6-001-RNA-012-02D12-3415	2601	ASO_G0250742_AD_05	RP11-834C11.4	ENSG00000250742	lncRNA_intergenic	Targeted lncRNA
908	CNhi10455_GCT	12696139	F6-001-RNA-001-01B10-C95A	2415	ASO_G0250742_01	RP11-834C11.4	ENSG00000250742	lncRNA_intergenic	Targeted lncRNA
909	CNhi10630_ACC	15623377	F6-001-RNA-012-02A11-42DE	2601	ASO_G0250742_AD_04	RP11-834C11.4	ENSG00000250742	lncRNA_intergenic	Targeted lncRNA
910	CNhi10634_CAC	8158756	F6-001-RNA-012-02C12-8ED7	2601	ASO_G0250742_AD_05	RP11-834C11.4	ENSG00000250742	lncRNA_intergenic	Targeted lncRNA
911	CNhi10460_GCT	11839857	F6-001-RNA-001-03B10-CCF1	2415	ASO_G0250742_01	RP11-834C11.4	ENSG00000250742	lncRNA_intergenic	Targeted lncRNA
912	CNhi10604_GCG	7754143	F6-001-RNA-010-04B12-5CFE	2577	ASO_G0258704_09	RP11-85K15.2	ENSG00000258704	lncRNA_divergent	Targeted lncRNA
913	CNhi10603_GCT	9385464	F6-001-RNA-010-04A12-501E	2577	ASO_G0258704_09	RP11-85K15.2	ENSG00000258704	lncRNA_divergent	Targeted lncRNA
914	CNhi10582_ACG	7730544	F6-001-RNA-009-01B08-98EB	2562	ASO_G0261327_05	RP11-863P13.3	ENSG00000261327	lncRNA_intergenic	Failed QC
915	CNhi10582_TAC	8067332	F6-001-RNA-009-01A08-E3D8	2562	ASO_G0261327_05	RP11-863P13.3	ENSG00000261327	lncRNA_intergenic	Failed QC
916	CNhi10583_GCT	6499297	F6-001-RNA-009-04E10-D5B4	2562	ASO_G0262468_02	RP11-95P2.1	ENSG00000262468	lncRNA_intergenic	Failed QC
917	CNhi10584_ATG	8225515	F6-001-RNA-009-04H12-4807	2562	ASO_G0262468_07	RP11-95P2.1	ENSG00000262468	lncRNA_intergenic	Failed QC
918	CNhi10584_ACC	13095988	F6-001-RNA-009-04F10-25FE	2562	ASO_G0262468_02	RP11-95P2.1	ENSG00000262468	lncRNA_intergenic	Failed QC
919	CNhi10584_CAC	12227283	F6-001-RNA-009-04G11-AFEA	2562	ASO_G0262468_04	RP11-95P2.1	ENSG00000262468	lncRNA_intergenic	Failed QC
920	CNhi10584_GCG	7923049	F6-001-RNA-009-04G12-156A	2562	ASO_G0262468_07	RP11-95P2.1	ENSG00000262468	lncRNA_intergenic	Failed QC
921	CNhi10584_AGT	10391946	F6-001-RNA-009-04H11-FC61	2562	ASO_G0262468_04	RP11-95P2.1	ENSG00000262468	lncRNA_intergenic	Failed QC
922	CNhi10585_AGT	8942413	F6-001-RNA-009-02H09-B6BB	2562	ASO_G0265458_10	RP13-20L14.6	ENSG00000265458	lncRNA_divergent	Failed QC
923	CNhi10785_AGT	11222687	F6-001-RNA-016-04A05-0CD6	2860	ASO_G0265458_AD_03	RP13-20L14.6	ENSG00000265458	lncRNA_divergent	Targeted lncRNA
924	CNhi10585_CAC	9451810	F6-001-RNA-009-02G09-02FF	2562	ASO_G0265458_10	RP13-20L14.6	ENSG00000265458	lncRNA_divergent	Failed QC
925	CNhi10791_GCT	10535006	F6-001-RNA-016-04B05-A0E5	2860	ASO_G0265458_AD_03	RP13-20L14.6	ENSG00000265458	lncRNA_divergent	Targeted lncRNA
926	CNhi10609_TAC	10093852	F6-001-RNA-010-03E07-299D	2577	ASO_G0242147_05	RP13-463N16.6	ENSG00000242147	lncRNA_intergenic	Targeted lncRNA
927	CNhi10603_CAC	10533785	F6-001-RNA-010-03G08-4517	2577	ASO_G0242147_07	RP13-463N16.6	ENSG00000242147	lncRNA_intergenic	Targeted lncRNA
928	CNhi10607_GCT	8819208	F6-001-RNA-010-03H08-3614	2577	ASO_G0242147_07	RP13-463N16.6	ENSG00000242147	lncRNA_intergenic	Targeted lncRNA
929	CNhi10603_TAC	11081721	F6-001-RNA-010-03F07-7A2D	2577	ASO_G0242147_05	RP13-463N16.6	ENSG00000242147	lncRNA_intergenic	Targeted lncRNA
930	CNhi10452_AGT	13153760	F6-001-RNA-001-03G12-A070	2415	ASO_G0228526_10	RP3-510D11.1	ENSG00000228526	lncRNA_intergenic	Targeted lncRNA
931	CNhi10460_ACC	16071192	F6-001-RNA-001-01G12-5C6D	2415	ASO_G0228526_10	RP3-510D11.1	ENSG00000228526	lncRNA_intergenic	Targeted lncRNA
932	CNhi10453_CAC	12238243	F6-001-RNA-001-03B06-13AE	2415	ASO_G0234546_07	RP3-510D11.2	ENSG00000234546	lncRNA_divergent	Targeted lncRNA
933	CNhi10453_GCT	10563321	F6-001-RNA-001-03B04-1F3F	2415	ASO_G0234546_01	RP3-510D11.2	ENSG00000234546	lncRNA_divergent	Targeted lncRNA
934	CNhi10452_GCT	11695345	F6-001-RNA-001-01D05-A96D	2415	ASO_G0234546_02	RP3-510D11.2	ENSG00000234546	lncRNA_divergent	Targeted lncRNA
935	CNhi10461_TAC	14512791	F6-001-RNA-001-01B04-46ED	2415	ASO_G0234546_01	RP3-510D11.2	ENSG00000234546	lncRNA_divergent	Targeted lncRNA
936	CNhi10458_GCT	14142898	F6-001-RNA-001-03D05-BCF1	2415	ASO_G0234546_02	RP3-510D11.2	ENSG00000234546	lncRNA_divergent	Targeted lncRNA
937	CNhi10459_CAC	11615191	F6-001-RNA-001-01B06-EBB7	2415	ASO_G0234546_07	RP3-510D11.2	ENSG00000234546	lncRNA_divergent	Targeted lncRNA
938	CNhi10527_CAC	12228346	F6-001-RNA-004-03C09-C61E	2514	ASO_G0227811_06	RP4-773A18.4	ENSG00000227811	lncRNA_divergent	Targeted lncRNA
939	CNhi10531_ATG	8206194	F6-001-RNA-004-03D09-D42C	2514	ASO_G0227811_06	RP4-773A18.4	ENSG00000227811	lncRNA_divergent	Targeted lncRNA
940	CNhi10580_CAC	6043487	F6-001-RNA-006-04G06-AE5D	2562	ASO_G0230812_10	RP4-794H19.4	ENSG00000230812	lncRNA_intergenic	Failed QC
941	CNhi10580_ACC	6780506	F6-001-RNA-006-04H05-BF16	2562	ASO_G0230812_05	RP4-794H19.4	ENSG00000230812	lncRNA_intergenic	Failed QC
942	CNhi10580_AGT	5913360	F6-001-RNA-006-04H06-E3B9	2562	ASO_G0230812_10	RP4-794H19.4	ENSG00000230812	lncRNA_intergenic	Failed QC
943	CNhi10579_GCT	7723967	F6-001-RNA-006-04G05-3BDF	2562	ASO_G0230812_05	RP4-794H19.4	ENSG00000230812	lncRNA_intergenic	Failed QC
944	CNhi10784_ACG	19616044	F6-001-RNA-015-01E04-0E0E	2860	ASO_G0225377_AD_05	RP5-1103G7.4	ENSG00000225377	lncRNA_divergent	Targeted lncRNA
945	CNhi10529_AGT	7966028	F6-001-RNA-004-02C02-8AFD	2514	ASO_G0225377_05	RP5-1103G7.4	ENSG00000225377	lncRNA_divergent	Targeted lncRNA
946	CNhi10528_CAC	10337107	F6-001-RNA-004-02D02-C123	2514	ASO_G0225377_05	RP5-1103G7.4	ENSG00000225377	lncRNA_divergent	Targeted lncRNA
947	CNhi10793_GCT	11510790	F6-001-RNA-015-01F04-DBBE	2860	ASO_G0225377_AD_05	RP5-1103G7.4	ENSG00000225377	lncRNA_divergent	Targeted lncRNA
948	CNhi10764_CAC	10632021	F6-001-RNA-014-03A01-F1A9	2817	ASO_G0236810_AD_02	RP5-886K2.3	ENSG00000236810	lncRNA_divergent	Targeted lncRNA
949	CNhi10757_ACC	11330779	F6-001-RNA-014-03B03-2944	2817	ASO_G0236810_AD_06	RP5-886K2.3	ENSG00000236810	lncRNA_divergent	Targeted lncRNA
950	CNhi10762_ACG	12845977	F6-001-RNA-014-03A03-9769	2817	ASO_G0236810_AD_06	RP5-886K2.3	ENSG00000236810	lncRNA_divergent	Targeted lncRNA
951	CNhi10764_GCG	8961734	F6-001-RNA-014-03B01-8B16	2817	ASO_G0236810_AD_02	RP5-886K2.3	ENSG00000236810	lncRNA_divergent	Targeted lncRNA
952	CNhi10601_ACC	7085173	F6-001-RNA-010-02A10-9592	2577	ASO_G0241990_01	RP6-109B7.3	ENSG00000241990	lncRNA_divergent	Targeted lncRNA
953	CNhi10605_GCG	7467779	F6-001-RNA-010-02D12-E435	2577	ASO_G0241990_07	RP6-109B7.3	ENSG00000241990	lncRNA_divergent	Targeted lncRNA
954	CNhi10602_GCT	9780392	F6-001-RNA-010-02C12-0799	2577	ASO_G0241990_07	RP6-109B7.3	ENSG00000241990	lncRNA_divergent	Targeted lncRNA
955	CNhi10611_CAC	7343841	F6-001-RNA-010-02B10-A180	2577	ASO_G0241990_01	RP6-109B7.3	ENSG00000241990	lncRNA_divergent	Targeted lncRNA
956	CNhi10453_AGT	15479001	F6-001-RNA-001-04G09-7CE4	2415	ASO_G0270069_05	RP6-99M1.2	ENSG00000270069	lncRNA_intergenic	Targeted lncRNA
957	CNhi10630_ACG	8253192	F6-001-RNA-012-03F08-1EA8	2601	ASO_G0270069_AD_07	RP6-99M1.2	ENSG00000270069	lncRNA_intergenic	Targeted lncRNA
958	CNhi10462_ACC	15059197	F6-001-RNA-001-02G09-ED35	2415	ASO_G0270069_05	RP6-99M1.2	ENSG00000270069	lncRNA_intergenic	Targeted lncRNA
959	CNhi10638_ACC	8401786	F6-001-RNA-012-03E08-FF4E	2601	ASO_G0270069_AD_07	RP6-99M1.2	ENSG00000270069	lncRNA_intergenic	Targeted lncRNA
960	CNhi10606_GCT	10981231	F6-001-RNA-010-03F01-94FE	2577	ASO_G0246273_02	SBF2-AS1	ENSG00000246273	lncRNA_antisense	Targeted lncRNA
961	CNhi10603_ACG	8123064	F6-001-RNA-010-03E01-1992	2577	ASO_G0246273_02	SBF2-AS1	ENSG00000246273	lncRNA_antisense	Targeted lncRNA
962	CNhi10467_ACG	13249054	F6-001-RNA-002-03H03-320B	2445	ASO_G0203706_01	SERTAD4-AS1	ENSG00000203706	lncRNA_intergenic	Targeted lncRNA
963	CNhi10470_ACC	16678887	F6-001-RNA-002-03G03-9011	2445	ASO_G0203706_01	SERTAD4-AS1	ENSG00000203706	lncRNA_intergenic	Targeted lncRNA
964	CNhi10634_TAC	10369276	F6-001-RNA-012-02H12-A02F	2601	ASO_G0250786_AD_10	SNHG18	ENSG00000250786	lncRNA_divergent	Targeted lncRNA
965	CNhi10634_GCG	8601650	F6-001-RNA-012-02G12-86A9	2601	ASO_G0250786_AD_10	SNHG18	ENSG00000250786	lncRNA_divergent	Targeted lncRNA
966	CNhi10453_TAC	18152603	F6-001-RNA-001-01F11-D5EA	2415	ASO_G0250786_04	SNHG18	ENSG00000250786	lncRNA_divergent	Targeted lncRNA
967	CNhi10455_ACG	10768850	F6-001-RNA-001-03F11-DCE1	2415	ASO_G0250786_04	SNHG18	ENSG00000250786	lncRNA_divergent	Targeted lncRNA
968	CNhi10763_CAC	9240836	F6-001-RNA-014-03H08-3C37	2817	ASO_G0246985_AD_04	SOCS2-AS1	ENSG00000246985	lncRNA_divergent	Targeted lncRNA
969	CNhi10811_ACC	11728145	F6-001-RNA-021-03D09-5AB6	2866	ASO_G0246985_AD_04	SOCS2-AS1	ENSG00000246985	lncRNA_divergent	Targeted lncRNA
970	CNhi10812_GCT	7383202	F6-001-RNA-014-03E07-2516	2866	ASO_G0246985_AD_01	SOCS2-AS1	ENSG00000246985	lncRNA_divergent	Targeted lncRNA
971	CNhi10611_ACC	8227028	F6-001-RNA-010-03A06-72E4	2577	ASO_G0246985_10	SOCS2-AS1	ENSG00000246985	lncRNA_divergent	Targeted lncRNA
972	CNhi10812_TAC	18665753	F6-001-RNA-014-03F07-0CE5	2866	ASO_G0246985_AD_01	SOCS2-AS1	ENSG00000246985	lncRNA_divergent	Targeted lncRNA
973	CNhi10603_GCG	7578146	F6-001-RNA-010-03B06-D421	2577	ASO_G0246985_10	SOCS2-AS1	ENSG00000246985	lncRNA_divergent	Targeted lncRNA
974	CNhi10816_GCG	6531654	F6-001-RNA-021-03C09-1AC3	2866	ASO_G0246985_AD_04	SOCS2-AS1	ENSG00000246985	lncRNA_divergent	Targeted lncRNA
975	CNhi10603_ACC	10800898	F6-001-RNA-010-03B12-240E	2577	ASO_G0248508_10	SRP14-AS1	ENSG00000248508	lncRNA_divergent	Targeted lncRNA
976	CNhi10606_CAC	7765016	F6-001-RNA-010-03A12-AA0A	2577	ASO_G0248508_10	SRP14-AS1	ENSG00000248508	lncRNA_divergent	Targeted lncRNA
977	CNhi10602_ACC	8536238	F6-001-RNA-010-03A10-03ED	2577	ASO_G0248508_04	SRP14-AS1	ENSG00000248508	lncRNA_divergent	Targeted lncRNA
978	CNhi10601_GCT	8848226	F6-001-RNA-010-03B10-4A15	2577	ASO_G0248508_04	SRP14-AS1	ENSG00000248508	lncRNA_divergent	Targeted lncRNA
979	CNhi10531_TAC	8452125	F6-001-RNA-004-03C02-6329	2514	ASO_G0226823_03	SUGT1P	ENSG00000226823	pseudogene	Targeted lncRNA
980	CNhi10528_ATG	11505954	F6-001-RNA-004-03D02-2694	2514	ASO_G0226823_03	SUGT1P	ENSG00000226823	pseudogene	Targeted lncRNA
981	CNhi10528_GCT	11091200	F6-001-RNA-004-03A03-40FD	2514	ASO_G0226823_08	SUGT1P	ENSG00000226823	pseudogene	Targeted lncRNA
982	CNhi10527_TAC	14615608	F6-001-RNA-004-03B03-A098	2514	ASO_G0226823_08	SUGT1P	ENSG00000226823	pseudogene	Targeted lncRNA
983	CNhi10632_GCT	7751288	F6-001-RNA-012-03B12-8D2A	2601	ASO_G0270141_AD_10	TERC	ENSG00000270141	lncRNA_intergenic	Targeted lncRNA
984	CNhi10757_TAC	15389685	F6-001-RNA-014-03G12-0C21	2817	ASO_G0270141_AD_10	TERC	ENSG00000270141	lncRNA_intergenic	Targeted lncRNA
985	CNhi10762_CAC	8040904	F6-001-RNA-014-03H12-A933	2817	ASO_G0270141_AD_10	TERC	ENSG00000270141	lncRNA_intergenic	Targeted lncRNA
986	CNhi10453_ACG	14043531	F6-001-RNA-001-04C12-2145	2415	ASO_G0270141_05	TERC	ENSG00000270141	lncRNA_intergenic	Targeted lncRNA
987	CNhi10639_ATG	6963190	F6-001-RNA-012-03A12-1602	2601	ASO_G0270141_AD_10	TERC	ENSG00000270141	lncRNA_intergenic	Targeted lncRNA
988	CNhi10757_AGT	11869043	F6-001-RNA-013-01G12-F8EC	2817	ASO_G0270141_AD_10	TERC	ENSG00000270141	lncRNA_intergenic	Targeted lncRNA
989	CNhi10456_ACG	14444449	F6-001-RNA-001-02C12-3A15	2415	ASO_G0270141_05	TERC	ENSG00000270141	lncRNA_intergenic	Targeted lncRNA
990	CNhi10764_TAC	17359807	F6-001-RNA-013-01H12-29E1	2817	ASO_G0270141_AD_10	TERC	ENSG00000270141	lncRNA_intergenic	Targeted lncRNA
991	CNhi10834_GCG	5306075	F6-001-RNA-021-05C03-E5BD	2861	ASO_G0271270_AD_10	TMCC1-AS1	ENSG00000271270	lncRNA_divergent	Targeted lncRNA
992	CNhi10497_CAC	5886040	F6-001-RNA-003-03B12-00A5	2458	ASO_G0271270_09	TMCC1-AS1	ENSG00000271270	lncRNA_divergent	Targeted lncRNA
993	CNhi10803_GCT	6863595	F6-001-RNA-021-05D03-0280	2861	ASO_G0271270_AD_10	TMCC1-AS1	ENSG00000271270	lncRNA_divergent	Targeted lncRNA
994	CNhi10490_GCT	11237990	F6-001-RNA-003-03A12-DEEE	2458	ASO_G0271270_09	TMCC1-AS1	ENSG00000271270	lncRNA_divergent	Targeted lncRNA
995	CNhi10610_ACG	9929611	F6-001-RNA-011-02B08-4607	2577	ASO_G0182165_AD_04	TP53TG1	ENSG00000182165	lncRNA_divergent	Targeted lncRNA
996	CNhi10635_TAC	8788606	F6-001-RNA-012-04A02-8203	2601	ASO_G0182165_AD_04	TP53TG1	ENSG00000182165	lncRNA_divergent	Targeted lncRNA
997	CNhi10640_GCG	5608206	F6-001-RNA-012-04B02-14AA	2601	ASO_G0182165_AD_04	TP53TG1	ENSG00000182165	lncRNA_divergent	Targeted lncRNA
998	CNhi10605_ACC	12534415	F6-001-RNA-011-02B09-79F4	2577	ASO_G0182165_AD_10	TP53TG1	ENSG00000182165	lncRNA_divergent	Targeted lncRNA
999	CNhi10603_AGT	9827093	F6-001-RNA-011-02D09-DDA6	2577	ASO_G0182165_AD_08	TP53TG1	ENSG00000182165	lncRNA_divergent	Targeted lncRNA
1000	CNhi10804_GCT	6124583	F6-001-RNA-021-02F02-5369	2861	ASO_G0225791_AD_05	TRAM2-AS1	ENSG00000225791	lncRNA_divergent	Targeted lncRNA
1001	CNhi10477_ACG	10146435	F6-001-RNA-002-02F01-3A14	2445	ASO_G0225791_05	TRAM2-AS1	ENSG00000225791	lncRNA_divergent	Targeted lncRNA
1002	CNhi10803_ACG	9806717	F6-001-RNA-021-02E02-8797	2861	ASO_G0225791_AD_05	TRAM2-AS1	ENSG00000225791	lncRNA_divergent	Targeted lncRNA
1003	CNhi10469_CAC	11025199	F6-001-RNA-002-02E01-8A10	2445	ASO_G0225791_05	TRAM2-AS1	ENSG00000225791	lncRNA_divergent	Targeted lncRNA
1004	CNhi10496_AGT	11444498	F6-001-RNA-003-02A04-838C	2458	ASO_G0237298_01	TTN-AS1	ENSG00000237298	lncRNA_antisense	Targeted lncRNA
1005	CNhi10493_GCT	11677037	F6-001-RNA-003-02B04-35A3	2458	ASO_G0237298_01	TTN-AS1	ENSG00000237298	lncRNA_antisense	Targeted lncRNA
1006	CNhi10489_AGT	10832719	F6-001-RNA-003-02B06-32D9	2458	ASO_G0237298_09	TTN-AS1	ENSG00000237298	lncRNA_antisense	Targeted lncRNA
1007	CNhi10491_AGT	12865499	F6-001-RNA-003-02A06-EB73	2458	ASO_G0237298_09	TTN-AS1	ENSG00000237298	lncRNA_antisense	Targeted lncRNA
1008	CNhi10456_AGT	18452674	F6-001-RNA-001-02E01-8B0A	2415	ASO_G0253352_02	TUG1	ENSG00000253352	lncRNA_divergent	Targeted lncRNA
1009	CNhi10463_GCG	8093506	F6-001-RNA-001-04G03-5B21	2415	ASO_G0253352_06	TUG1	ENSG00000253352	lncRNA_divergent	Targeted lncRNA
1010	CNhi10639_GCT	7534662	F6-001-RNA-012-03F02-9B0F	2601	ASO_G0253352_AD_08	TUG1	ENSG00000253352	lncRNA_divergent	Targeted lncRNA
1011	CNhi10456_ACC	13793433	F6-001-RNA-001-02G01-4AAD	2415	ASO_G0253352_01	TUG1	ENSG00000253352	lncRNA_divergent	Targeted lncRNA
1012	CNhi10459_TAC	16534350	F6-001-RNA-001-04G01-9064	2415	ASO_G0253352_01	TUG1	ENSG00000253352	lncRNA_divergent	Targeted lncRNA
1013	CNhi10452_ATG	15699508	F6-001-RNA-001-04E01-D266	2415	ASO_G0253352_02	TUG1	ENSG00000253352	lncRNA_divergent	Targeted lncRNA
1014	CNhi10637_ATG	8061158	F6-001-RNA-012-03G02-8EC4	2601	ASO_G0253352_AD_07	TUG1	ENSG00000253352	lncRNA_divergent	Targeted lncRNA
1015	CNhi10457_TAC	15240560	F6-001-RNA-001-02G03-1CF4	2415	ASO_G0253352_06	TUG1	ENSG00000253352	lncRNA_divergent	Targeted lncRNA
1016	CNhi10640_CAC	7433553	F6-001-RNA-012-03E02-5650	2601	ASO_G0253352_AD_08	TUG1	ENSG00000253352	lncRNA_divergent	Targeted lncRNA
1017	CNhi10638_CAC	7498555	F6-001-RNA-012-03H02-12D0	2601	ASO_G0253352_AD_07	TUG1	ENSG00000253352	lncRNA_divergent	Targeted lncRNA
1018	CNhi10533_ACG	7668910	F6-001-RNA-006-01C12-8ACB	2515	ASO_G0232725_05	U52111.14	ENSG00000232725	lncRNA_divergent	Targeted lncRNA
1019	CNhi10804_ACG	9597972	F6-001-RNA-019-03C03-19DC	2861	ASO_G0232725_AD_10	U52111.14	ENSG00000232725	lncRNA_divergent	Targeted lncRNA
1020	CNhi10538_CAC	7410475	F6-001-RNA-006-01D12-9936	2515	ASO_G0232725_05	U52111.14	ENSG00000232725	lncRNA_divergent	Targeted lncRNA
1021	CNhi10833_ATG	13635518	F6-001-RNA-019-03D03-9432	2861	ASO_G0232725_AD_10	U52111.14	ENSG00000232725	lncRNA_divergent	Targeted lncRNA
1022	CNhi10787_ATG	20383378	F6-001-RNA-015-02G11-62CA	2860	ASO_G0247240_AD_05	UBL7-AS1	ENSG00000247240	lncRNA_divergent	Targeted lncRNA
1023	CNhi10785_TAC	18906371	F6-001-RNA-015-02H11-C21E	2860	ASO_G0247240_AD_05	UBL7-AS1	ENSG00000247240	lncRNA_divergent	Targeted lncRNA
1024	CNhi10784_CAC	9569985	F6-001-RNA-015-02H12-0DD4	2860	ASO_G0247240_AD_06	UBL7-AS1	ENSG00000247240	lncRNA_divergent	Targeted lncRNA
1025	CNhi10786_GCG	8898284	F6-001-RNA-015-02G12-7A88	2860	ASO_G0247240_AD_06	UBL7-AS1	ENSG00000247240	lncRNA_divergent	Targeted lncRNA
1026	CNhi10785_ACG	17119505	F6-001-RNA-016-03E10-ED36	2860	ASO_Untreat	Untreat	Untreat	other	Native Fibroblasts
1027	CNhi10831_GCG	10843124	F6-001-RNA-019-03E10-8ED8	2861	ASO_Untreat	Untreat	Untreat	other	Native Fibroblasts
1028	CNhi10761_ACC	16398237	F6-001-RNA-014-03F10-CC58	2817	ASO_Untreat	Untreat	Untreat	other	Native Fibroblasts
1029	CNhi10786_ACC	15697887	F6-001-RNA-016-03F10-1581	2860	ASO_Untreat	Untreat	Untreat	other	Native Fibroblasts
1030	CNhi10758_ATG	5384626	F6-001-RNA-013-01F10-BC71	2817	ASO_Untreat	Untreat	Untreat	other	Native Fibroblasts
1031	CNhi10835_ACC	13733197	F6-001-RNA-018-01E10-AD35	2861	ASO_Untreat	Untreat	Untreat	other	Native Fibroblasts
1032	CNhi10812_GCG	582884	F6-001-RNA-020-01G07-AB9D	2866	ASO_Untreat	Untreat	Untreat	other	Native Fibroblasts
1033	CNhi10813_GCG	6516978	F6-001-RNA-020-01H07-594E	2866	ASO_Untreat	Untreat	Untreat	other	Native Fibroblasts
1034	CNhi10765_TAC	15623506	F6-001-RNA-014-03E10-7F14	2817	ASO_Untreat	Untreat	Untreat	other	Native Fibroblasts
1035	CNhi10810_ATG	13806695	F6-001-RNA-021-03G07-F831	2866	ASO_Untreat	Untreat	Untreat	other	Native Fibroblasts
1036	CNhi10818_AGT	11191078	F6-001-RNA-021-03H07-9645	2866	ASO_Untreat	Untreat	Untreat	other	Native Fibroblasts
1037	CNhi10803_CAC	6536336	F6-001-RNA-018-01F10-38D5	2861	ASO_Untreat	Untreat	Untreat	other	Native Fibroblasts
1038	CNhi10784_GCG	9798218	F6-001-RNA-015-01F10-7240	2860	ASO_Untreat	Untreat	Untreat	other	Native Fibroblasts
1039	CNhi10836_GCT	7692494	F6-001-RNA-019-03F10-8C17	2861	ASO_Untreat	Untreat	Untreat	other	Native Fibroblasts
1040	CNhi10789_ACG	13912590	F6-001-RNA-015-01E10-4B5E	2860	ASO_Untreat	Untreat	Untreat	other	Native Fibroblasts
1041	CNhi10837_CAC	5697514	F6-001-RNA-021-02B01-BDA2	2861	ASO_G0180769_AD_03	WDFY3-AS2	ENSG00000180769	lncRNA_divergent	Targeted lncRNA
1042	CNhi10521_ACC	13812070	F6-001-RNA-005-02E10-59CA	2514	ASO_G0180769_03	WDFY3-AS2	ENSG00000180769	lncRNA_divergent	Targeted lncRNA
1043	CNhi10531_GCG	5177645	F6-001-RNA-005-02G12-747E	2514	ASO_G0180769_08	WDFY3-AS2	ENSG00000180769	lncRNA_divergent	Targeted lncRNA
1044	CNhi10528_TAC	8815106	F6-001-RNA-005-02F10-C25D	2514	ASO_G0180769_03	WDFY3-AS2	ENSG00000180769	lncRNA_divergent	Targeted lncRNA
1045	CNhi10834_GCT	4991177	F6-001-RNA-021-02A01-20FD	2861	ASO_G0180769_AD_03	WDFY3-AS2	ENSG00000180769	lncRNA_divergent	Targeted lncRNA
1046	CNhi10530_ACG	7137095	F6-001-RNA-005-02H12-4609	2514	ASO_G0180769_08	WDFY3-AS2	ENSG00000180769	lncRNA_divergent	Targeted lncRNA
1047	CNhi10837_ACC	7832249	F6-001-RNA-018-01D03-54B8	2861	ASO_C0008543_AD_10	ZNF131	ENSG00000172262	coding_mRNA	Positive Control
1048	CNhi10492_AGT	11920698	F6-001-RNA-003-01B03-B9FE	2458	ASO_C0008543_05	ZNF131	ENSG00000172262	coding_mRNA	Positive Control
1049	CNhi10494_CAC	7650254	F6-001-RNA-003-01A03-4188	2458	ASO_C0008543_05	ZNF131	ENSG00000172262	coding_mRNA	Positive Control
1050	CNhi10830_GCT	6373459	F6-001-RNA-018-01C03-D788	2861	ASO_C0008543_AD_10	ZNF131	ENSG00000172262	coding_mRNA	Positive Control
1051	CNhi10538_ACG	8750062	F6-001-RNA-006-02A07-153A	2515	ASO_G0234420_01	ZNF37BP	ENSG00000234420	pseudogene	Targeted lncRNA
1052	CNhi10543_CAC	6615300	F6-001-RNA-006-02B07-3FF9	2515	ASO_G0234420_01	ZNF37BP	ENSG00000234420	pseudogene	Targeted lncRNA
1053	CNhi10493_AGT	11077255	F6-001-RNA-003-04B10-1937	2458	ASO_G0230844_01	ZNF674-AS1	ENSG00000230844	lncRNA_divergent	Targeted lncRNA
1054	CNhi10803_AGT	9146573	F6-001-RNA-021-02E12-4CF1	2861	ASO_G0230844_AD_06	ZNF674-AS1	ENSG00000230844	lncRNA_divergent	Targeted lncRNA
1055	CNhi10801_TAC	8867260	F6-001-RNA-021-02F12-56D2	2861	ASO_G0230844_AD_06	ZNF674-AS1	ENSG00000230844	lncRNA_divergent	Targeted lncRNA
1056	CNhi10486_ATG	11120295	F6-001-RNA-003-04A10-012F	2458	ASO_G0230844_01	ZNF674-AS1	ENSG00000230844	lncRNA_divergent	Targeted lncRNA
1057	CNhi10783_ACC	13163936	F6-001-RNA-016-04E09-CD64	2860	ASO_G0267886_AD_04	ZNF730	ENSG00000183850	coding_mRNA	Positive Control
1058	CNhi10787_ACC	14096883	F6-001-RNA-016-04E08-0CF7	2860	ASO_G0267886_AD_02	ZNF730	ENSG00000183850	coding_mRNA	Positive Control
1059	CNhi10792_ATG	13878568	F6-001-RNA-016-04F09-0D2A	2860	ASO_G0267886_AD_04	ZNF730	ENSG00000183850	coding_mRNA	Positive Control
1060	CNhi10784_AGT	8713707	F6-001-RNA-016-04F08-AE73	2860	ASO_G0267886_AD_02	ZNF730	ENSG00000183850	coding_mRNA	Positive Control
1061	CNhi10609_AGT	8114052	F6-001-RNA-010-01A02-4AB2	2577	ASO_G0267886_03	ZNF730	ENSG00000183850	coding_mRNA	Positive Control
1062	CNhi10608_CAC	11769667	F6-001-RNA-010-01B02-342C	2577	ASO_G0267886_03	ZNF730	ENSG00000183850	coding_mRNA	Positive Control
1063	CNhi10601_GCG	6970092	F6-001-RNA-010-01A04-15DA	2577	ASO_G0269293_01	ZSCAN16-AS1	ENSG00000269293	lncRNA_intergenic	Targeted lncRNA
1064	CNhi10608_GCG	5401419	F6-001-RNA-010-01B04-3A84	2577	ASO_G0269293_01	ZSCAN16-AS1	ENSG00000269293	lncRNA_intergenic	Targeted lncRNA
1065	CNhi10830_AGT	6441673	F6-001-RNA-019-04H12-66C3	2861	ASO_G0269293_AD_10	ZSCAN16-AS1	ENSG00000269293	lncRNA_intergenic	Targeted lncRNA
1066	CNhi10805_GCG	5074112	F6-001-RNA-019-04G12-942A	2861	ASO_G0269293_AD_10	ZSCAN16-AS1	ENSG00000269293	lncRNA_intergenic	Targeted lncRNA
