# Supplementary material for: Functional annotation of human long noncoding RNAs via molecular phenotyping
Source: Genome Res. 2020 Jul;30(7):1060–72. doi: 10.1101/gr.254219.119 (PMC7397864; doi:10.1101/gr.254219.119)
Supplement: Supplemental Material [file supp_gr.254219.119_Supplemental_Table_S5_.xlsx]

## Sheet: Info
	Supplemental Table S5. Molecular phenotyping (CAGE-based) data.
	Table S5A. Molecular phenotyping (DEGs, GSEA, MARA; ASO-based).			Table S5B. Molecular phenotype data (DEGs, GSEA, MARA) for ASO pairs.			Table S5C. DEGs for ASO-siRNA pairs (validations).
	ID	Description		ID	Description		ID	Description
1	KD.pubID	HGNC symbol or KD.geneSymbol otherwise	1	pub.pair_id	KD.pubID and perturb_ids of paired ASOs	1	pair_type	same or different lncRNA target in the pair
2	perturb_id	ASO id	2	pair_id	KD.geneSymbol and perturb_ids of paired ASOs	2	pub.pair_id	KD.pubIDs and perturb_ids of paired ASOs concatenated
3	KD.geneSymbol	gene symbol of the knockdown target	3	KD.geneSymbol	gene symbol of the knockdown target	3	pair_id	KD.geneSymbols and perturb_ids of paired ASOs concatenated
4	Description	classification of knockdown targets: lncRNA, positive controls etc.	4	DEGs_comn	common DE genes in a pair	4	ASO_id	siRNA id
5	ASO_CAGE	number of ASOs in CAGE	5	DEGs_comn_down	downregulated DE genes in a pair	5	siRNA_id	siRNA id
6	DEGs_all	all DE genes	6	DEGs_comn_up	upregulated DE genes in a pair	6	DEGs_ASO	number of DEGs for ASOs
7	DEGs_down	number of downregulated genes per ASO	7	GSEA_comn	common GSEA genes in a pair	7	DEGs_siRNA	number of DEGs for siRNAs
8	DEGs_up	number of upregulated genes per ASO	8	GSEA_comn_down	downregulated GSEA genes in a pair	8	DEGs_comn	number of common DEGs
9	GSEA_all	all significant pathways	9	GSEA_comn_up	upregulated GSEA genes in a pair
10	GSEA_down	number of downregulated pathways per ASO	10	MARA_comn	common MARA genes in a pair
11	GSEA_up	number of upregulated pathways per ASO	11	MARA_comn_down	downregulated MARA genes in a pair
12	MARA_all	all significant MARA motifs	12	MARA_comn_up	upregulated MARA genes in a pair
13	MARA_down	number of downregulated motifs per ASO
14	MARA_up	number of upregulated motifs per ASO

## Sheet: Table S5A
	KD.pubID	KD.geneSymbol	Description	ASO_CAGE	perturb_id	DEGs_all	DEGs_down	DEGs_up	GSEA_all	GSEA_down	GSEA_up	MARA_all	MARA_down	MARA_Up
1	A1BG-AS1	A1BG-AS1	Targeted lncRNA	2	ASO_G0268895_01	849	464	385	117	110	7	1	1	0
2	A1BG-AS1	A1BG-AS1	Targeted lncRNA	2	ASO_G0268895_03	2220	1406	814	113	110	3	10	9	1
3	AC004980.7	AC004980.7	Targeted lncRNA	2	ASO_G0205485_01	978	710	268	110	102	8	5	1	4
4	AC004980.7	AC004980.7	Targeted lncRNA	2	ASO_G0205485_03	29	12	17	84	1	83	2	1	1
5	SPRY4-AS1	AC005592.2	Targeted lncRNA	2	ASO_G0231185_03	844	522	322	40	39	1	4	4	0
6	SPRY4-AS1	AC005592.2	Targeted lncRNA	2	ASO_G0231185_02	560	383	177	14	6	8	9	7	2
7	MAP4K3-DT	AC007246.3	Targeted lncRNA	2	ASO_G0231312_04	4	4	0	5	2	3	2	1	1
8	MAP4K3-DT	AC007246.3	Targeted lncRNA	2	ASO_G0231312_02	375	286	89	37	32	5	7	0	7
9	MYOSLID	AC007879.7	Targeted lncRNA	2	ASO_G0229647_06	62	56	6	28	2	26	1	1	0
10	MYOSLID	AC007879.7	Targeted lncRNA	2	ASO_G0229647_AD_09	2	2	0	50	50	0	0	0	0
11	AC009005.2	AC009005.2	Targeted lncRNA	2	ASO_G0267751_AD_02	18	16	2	45	45	0	0	0	0
12	CHROMR	AC009948.5	Targeted lncRNA	2	ASO_G0223960_AD_10	1	1	0	22	0	22	0	0	0
13	CHROMR	AC009948.5	Targeted lncRNA	2	ASO_G0223960_08	126	51	75	65	0	65	1	0	1
14	ZNF232-AS1	AC012146.7	Targeted lncRNA	2	ASO_G0234327_01	0	0	0	1	0	1	0	0	0
15	ZNF232-AS1	AC012146.7	Targeted lncRNA	2	ASO_G0234327_07	1	1	0	12	12	0	10	5	5
16	LINC01578	AC013394.2	Targeted lncRNA	3	ASO_G0272888_AD_07	88	69	19	13	13	0	2	0	2
17	LINC01578	AC013394.2	Targeted lncRNA	3	ASO_G0272888_AD_10	13	9	4	3	1	2	1	0	1
18	LINC01578	AC013394.2	Targeted lncRNA	3	ASO_G0272888_04	0	0	0	13	0	13	1	0	1
19	AC016747.3	AC016747.3	Targeted lncRNA	4	ASO_G0212978_03	520	324	196	96	91	5	7	4	3
20	AC016747.3	AC016747.3	Targeted lncRNA	4	ASO_G0212978_04	0	0	0	11	11	0	1	0	1
21	AC016747.3	AC016747.3	Targeted lncRNA	4	ASO_G0212978_02	67	41	26	110	99	11	1	0	1
22	AC016747.3	AC016747.3	Targeted lncRNA	4	ASO_G0212978_01	28	24	4	3	0	3	3	3	0
23	LINC01116	AC017048.3	Targeted lncRNA	3	ASO_G0163364_AD_01	1235	383	852	98	94	4	3	1	2
24	LINC01116	AC017048.3	Targeted lncRNA	3	ASO_G0163364_04	0	0	0	21	14	7	1	1	0
25	LINC01116	AC017048.3	Targeted lncRNA	3	ASO_G0163364_06	21	21	0	21	20	1	0	0	0
26	LINC01117	AC017048.4	Targeted lncRNA	4	ASO_G0224577_01	13	9	4	1	0	1	1	1	0
27	LINC01117	AC017048.4	Targeted lncRNA	4	ASO_G0224577_AD_05	667	32	635	209	209	0	0	0	0
28	LINC01117	AC017048.4	Targeted lncRNA	4	ASO_G0224577_05	1	1	0	42	5	37	0	0	0
29	LINC01117	AC017048.4	Targeted lncRNA	4	ASO_G0224577_02	404	160	244	42	42	0	0	0	0
30	LSP1P4	AC027612.6	Targeted lncRNA	1	ASO_G0143429_05	1078	508	570	238	238	0	5	4	1
31	ZFAND2A-DT	AC091729.9	Targeted lncRNA	2	ASO_G0229043_AD_04	0	0	0	0	0	0	1	1	0
32	ZFAND2A-DT	AC091729.9	Targeted lncRNA	2	ASO_G0229043_07	1999	1244	755	73	58	15	15	5	10
33	ZNF529-AS1	AC092295.7	Targeted lncRNA	3	ASO_G0233527_03	1	1	0	20	0	20	5	1	4
34	ZNF529-AS1	AC092295.7	Targeted lncRNA	3	ASO_G0233527_02	4756	2499	2257	85	60	25	5	1	4
35	ZNF529-AS1	AC092295.7	Targeted lncRNA	3	ASO_G0233527_07	1	0	1	0	0	0	9	5	4
36	RNASEH1-AS1	AC108488.3	Targeted lncRNA	5	ASO_G0234171_06	357	231	126	16	0	16	7	5	2
37	RNASEH1-AS1	AC108488.3	Targeted lncRNA	5	ASO_G0234171_03	2	2	0	13	0	13	0	0	0
38	RNASEH1-AS1	AC108488.3	Targeted lncRNA	5	ASO_G0234171_09	538	354	184	26	24	2	3	1	2
39	RNASEH1-AS1	AC108488.3	Targeted lncRNA	5	ASO_G0234171_01	39	39	0	32	0	32	0	0	0
40	RNASEH1-AS1	AC108488.3	Targeted lncRNA	5	ASO_G0234171_02	1382	879	503	32	27	5	4	2	2
41	AC124789.1	AC124789.1	Targeted lncRNA	1	ASO_G0260833_06	8642	4693	3949	452	452	0	24	12	12
42	AMZ2P1	AMZ2P1	Targeted lncRNA	2	ASO_G0214174_02	24	22	2	24	6	18	1	0	1
43	AMZ2P1	AMZ2P1	Targeted lncRNA	2	ASO_G0214174_06	7	5	2	0	0	0	4	1	3
44	FAM111A-DT	AP001258.4	Targeted lncRNA	1	ASO_G0245571_06	50	43	7	71	0	71	0	0	0
45	BOLA3-AS1	BOLA3-AS1	Targeted lncRNA	1	ASO_G0225439_06	1033	693	340	183	131	52	9	0	9
46	BX322557.10	BX322557.10	Targeted lncRNA	2	ASO_G0215447_01	18	14	4	59	52	7	1	1	0
47	BX322557.10	BX322557.10	Targeted lncRNA	2	ASO_G0215447_03	2	1	1	1	0	1	1	1	0
48	C11orf95	C11orf95	Targeted lncRNA	1	ASO_G0188070_AD_05	33	31	2	23	23	0	8	3	5
49	CATG00000016989.1	CATG00000016989.1	Targeted lncRNA	2	ASO_C0020443_06	72	60	12	19	15	4	1	1	0
50	CATG00000016989.1	CATG00000016989.1	Targeted lncRNA	2	ASO_C0020443_03	0	0	0	79	0	79	1	0	1
51	CATG00000020700.1	CATG00000020700.1	Targeted lncRNA	2	ASO_C0020984_09	644	386	258	56	46	10	2	0	2
52	CATG00000020700.1	CATG00000020700.1	Targeted lncRNA	2	ASO_C0020984_02	4	4	0	15	0	15	1	0	1
53	CATG00000079799.1	CATG00000079799.1	Targeted lncRNA	1	ASO_C0008586_03	10	9	1	34	0	34	0	0	0
54	CATG00000089639.1	CATG00000089639.1	Targeted lncRNA	2	ASO_G0223811_06	0	0	0	26	20	6	0	0	0
55	CATG00000089639.1	CATG00000089639.1	Targeted lncRNA	2	ASO_G0223811_04	90	25	65	47	45	2	1	1	0
56	CATG00000095991.1	CATG00000095991.1	Targeted lncRNA	4	ASO_C0012015_07	488	288	200	150	74	76	7	0	7
57	CATG00000095991.1	CATG00000095991.1	Targeted lncRNA	4	ASO_C0012015_AD_04	1	1	0	66	15	51	1	0	1
58	CATG00000095991.1	CATG00000095991.1	Targeted lncRNA	4	ASO_C0012015_AD_05	290	231	59	136	2	134	0	0	0
59	CATG00000095991.1	CATG00000095991.1	Targeted lncRNA	4	ASO_C0012015_AD_02	6	5	1	27	13	14	1	1	0
60	CATG00000098831.1	CATG00000098831.1	Targeted lncRNA	1	ASO_C0013510_06	460	370	90	11	0	11	1	1	0
61	CATG00000108369.1	CATG00000108369.1	Targeted lncRNA	1	ASO_C014559_06	54	47	7	251	246	5	2	2	0
62	CD27-AS1	CD27-AS1	Targeted lncRNA	1	ASO_G0215039_01	927	571	356	4	1	3	4	1	3
63	CD99P1	CD99P1	Targeted lncRNA	3	ASO_G0223773_06	0	0	0	78	0	78	3	1	2
64	CD99P1	CD99P1	Targeted lncRNA	3	ASO_G0223773_07	45	41	4	66	59	7	2	1	1
65	CD99P1	CD99P1	Targeted lncRNA	3	ASO_G0223773_05	4	4	0	24	21	3	1	0	1
66	CKMT2-AS1	CKMT2-AS1	Targeted lncRNA	2	ASO_G0247572_08	3	2	1	0	0	0	4	1	3
67	CKMT2-AS1	CKMT2-AS1	Targeted lncRNA	2	ASO_G0247572_09	48	36	12	10	0	10	9	1	8
68	MIATNB	CTA-211A9.5	Targeted lncRNA	4	ASO_G0244625_09	0	0	0	15	0	15	0	0	0
69	MIATNB	CTA-211A9.5	Targeted lncRNA	4	ASO_G0244625_AD_09	56	44	12	86	86	0	4	2	2
70	MIATNB	CTA-211A9.5	Targeted lncRNA	4	ASO_G0244625_AD_08	1	1	0	71	30	41	2	1	1
71	MIATNB	CTA-211A9.5	Targeted lncRNA	4	ASO_G0244625_04	11	10	1	1	0	1	4	0	4
72	LINC01184	CTC-228N24.3	Targeted lncRNA	3	ASO_G0245937_AD_05	17	9	8	0	0	0	0	0	0
73	LINC01184	CTC-228N24.3	Targeted lncRNA	3	ASO_G0245937_01	39	34	5	45	0	45	4	1	3
74	LINC01184	CTC-228N24.3	Targeted lncRNA	3	ASO_G0245937_AD_02	1	1	0	33	33	0	1	0	1
75	CTC-338M12.4	CTC-338M12.4	Targeted lncRNA	1	ASO_G0233937_05	1	1	0	1	0	1	0	0	0
76	ZNF56	CTC-559E9.6	Targeted lncRNA	3	ASO_G0267419_AD_04	6	5	1	37	37	0	2	2	0
77	ZNF56	CTC-559E9.6	Targeted lncRNA	3	ASO_G0267419_AD_06	2	1	1	4	4	0	1	0	1
78	ZNF433-AS1	CTD-2006C1.2	Targeted lncRNA	3	ASO_G0219665_AD_04	1	1	0	3	0	3	0	0	0
79	ZNF433-AS1	CTD-2006C1.2	Targeted lncRNA	3	ASO_G0219665_AD_08	12	12	0	22	15	7	1	0	1
80	ZNF433-AS1	CTD-2006C1.2	Targeted lncRNA	3	ASO_G0219665_08	0	0	0	15	0	15	0	0	0
81	CTD-2319I12.4	CTD-2319I12.4	Targeted lncRNA	3	ASO_G0267248_AD_07	0	0	0	147	144	3	0	0	0
82	CTD-2319I12.4	CTD-2319I12.4	Targeted lncRNA	3	ASO_G0267248_AD_03	2	2	0	217	203	14	6	1	5
83	CTD-2336O2.1	CTD-2336O2.1	Targeted lncRNA	1	ASO_G0253982_AD_01	2	2	0	66	41	25	1	0	1
84	CTD-2587H24.5	CTD-2587H24.5	Targeted lncRNA	2	ASO_G0267577_03	3647	2220	1427	120	119	1	15	2	13
85	CTD-2587H24.5	CTD-2587H24.5	Targeted lncRNA	2	ASO_G0267577_01	8298	4376	3922	257	255	2	23	14	9
86	CTD-2651B20.3	CTD-2651B20.3	Targeted lncRNA	2	ASO_G0259520_AD_04	3	2	1	0	0	0	3	2	1
87	CTD-2651B20.3	CTD-2651B20.3	Targeted lncRNA	2	ASO_G0259520_AD_08	0	0	0	14	13	1	2	1	1
88	ZNF528-AS1	CTD-3018O17.3	Targeted lncRNA	3	ASO_G0269834_AD_06	47	24	23	1	0	1	8	3	5
89	ZNF528-AS1	CTD-3018O17.3	Targeted lncRNA	3	ASO_G0269834_AD_02	68	47	21	20	0	20	0	0	0
90	ZNF528-AS1	CTD-3018O17.3	Targeted lncRNA	3	ASO_G0269834_02	52	41	11	77	74	3	1	0	1
91	CTD-3131K8.2	CTD-3131K8.2	Targeted lncRNA	1	ASO_G0269439_09	256	212	44	33	9	24	2	2	0
92	DANCR	DANCR	Targeted lncRNA	4	ASO_G0226950_02	2	2	0	181	161	20	1	1	0
93	DANCR	DANCR	Targeted lncRNA	4	ASO_G0226950_04	65	21	44	104	98	6	0	0	0
94	DANCR	DANCR	Targeted lncRNA	4	ASO_G0226950_05	74	51	23	22	15	7	6	6	0
95	DANCR	DANCR	Targeted lncRNA	4	ASO_G0226950_AD_07	63	52	11	2	1	1	3	3	0
96	DNAJC27-AS1	DNAJC27-AS1	Targeted lncRNA	2	ASO_G0224165_AD_07	1	1	0	4	3	1	0	0	0
97	DNAJC27-AS1	DNAJC27-AS1	Targeted lncRNA	2	ASO_G0224165_10	715	503	212	28	0	28	3	0	3
98	DNM3OS	DNM3OS	Targeted lncRNA	2	ASO_G0230630_AD_10	0	0	0	5	3	2	2	1	1
99	DNM3OS	DNM3OS	Targeted lncRNA	2	ASO_G0230630_AD_04	653	424	229	121	117	4	8	3	5
100	EMX2OS	EMX2OS	Targeted lncRNA	4	ASO_G0229847_AD_04	2703	1733	970	180	159	21	4	2	2
101	EMX2OS	EMX2OS	Targeted lncRNA	4	ASO_G0229847_01	35	23	12	69	48	21	7	7	0
102	EMX2OS	EMX2OS	Targeted lncRNA	4	ASO_G0229847_AD_02	1159	1151	8	128	111	17	5	1	4
103	EMX2OS	EMX2OS	Targeted lncRNA	4	ASO_G0229847_03	58	31	27	24	1	23	1	1	0
104	ERVK13-1	ERVK13-1	Targeted lncRNA	2	ASO_G0260565_AD_08	5	4	1	0	0	0	1	1	0
105	ERVK13-1	ERVK13-1	Targeted lncRNA	2	ASO_G0260565_AD_06	11	11	0	0	0	0	2	1	1
106	ERVK3-1	ERVK3-1	Targeted lncRNA	2	ASO_G0142396_AD_01	124	62	62	125	125	0	0	0	0
107	ERVK3-1	ERVK3-1	Targeted lncRNA	2	ASO_G0142396_AD_07	1969	985	984	254	253	1	2	0	2
108	FBXL19-AS1	FBXL19-AS1	Targeted lncRNA	1	ASO_G0260852_02	47	41	6	24	3	21	0	0	0
109	FGD5-AS1	FGD5-AS1	Targeted lncRNA	4	ASO_G0225733_AD_06	129	107	22	15	12	3	1	0	1
110	FGD5-AS1	FGD5-AS1	Targeted lncRNA	4	ASO_G0225733_AD_03	564	363	201	159	137	22	3	2	1
111	FGD5-AS1	FGD5-AS1	Targeted lncRNA	4	ASO_G0225733_04	234	128	106	15	15	0	1	1	0
112	FGD5-AS1	FGD5-AS1	Targeted lncRNA	4	ASO_G0225733_03	13	13	0	9	0	9	7	5	2
113	FLVCR1-DT	FLVCR1-AS1	Targeted lncRNA	3	ASO_G0198468_01	0	0	0	31	21	10	0	0	0
114	FLVCR1-DT	FLVCR1-AS1	Targeted lncRNA	3	ASO_G0198468_03	0	0	0	0	0	0	0	0	0
115	FLVCR1-DT	FLVCR1-AS1	Targeted lncRNA	3	ASO_G0198468_07	0	0	0	20	19	1	0	0	0
116	FOXN3-AS1	FOXN3-AS1	Targeted lncRNA	2	ASO_G0258920_AD_07	274	132	142	48	13	35	1	0	1
117	FTX	FTX	Targeted lncRNA	5	ASO_G0230590_06	3	3	0	98	0	98	0	0	0
118	FTX	FTX	Targeted lncRNA	5	ASO_G0230590_05	9	9	0	51	22	29	3	3	0
119	FTX	FTX	Targeted lncRNA	5	ASO_G0230590_AD_03	8	8	0	11	4	7	0	0	0
120	FTX	FTX	Targeted lncRNA	5	ASO_G0230590_AD_02	401	390	11	148	124	24	3	1	2
121	FTX	FTX	Targeted lncRNA	5	ASO_G0230590_02	19	14	5	33	33	0	0	0	0
122	JPX	JPX	Targeted lncRNA	2	ASO_G0225470_05	1	1	0	2	0	2	0	0	0
123	JPX	JPX	Targeted lncRNA	2	ASO_G0225470_AD_04	3	3	0	14	5	9	6	2	4
124	KTN1-AS1	KTN1-AS1	Targeted lncRNA	3	ASO_G0186615_03	2	2	0	4	0	4	2	1	1
125	KTN1-AS1	KTN1-AS1	Targeted lncRNA	3	ASO_G0186615_04	271	150	121	36	34	2	2	0	2
126	KTN1-AS1	KTN1-AS1	Targeted lncRNA	3	ASO_G0186615_09	0	0	0	0	0	0	0	0	0
127	LINC00339	LINC00339	Targeted lncRNA	3	ASO_G0218510_AD_06	451	96	355	120	120	0	2	1	1
128	LINC00339	LINC00339	Targeted lncRNA	3	ASO_G0218510_AD_03	690	355	335	329	329	0	0	0	0
129	LINC00339	LINC00339	Targeted lncRNA	3	ASO_G0218510_04	16	13	3	13	13	0	1	1	0
130	LINC00511	LINC00511	Targeted lncRNA	2	ASO_G0227036_04	341	197	144	198	17	181	3	0	3
131	LINC00511	LINC00511	Targeted lncRNA	2	ASO_G0227036_AD_07	2	1	1	30	28	2	1	0	1
132	LINC00517	LINC00517	Targeted lncRNA	3	ASO_G0259091_AD_10	1	1	0	11	11	0	0	0	0
133	LINC00517	LINC00517	Targeted lncRNA	3	ASO_G0259091_AD_04	22	14	8	11	11	0	0	0	0
134	LINC00517	LINC00517	Targeted lncRNA	3	ASO_G0259091_01	593	423	170	47	8	39	2	1	1
135	LINC00630	LINC00630	Targeted lncRNA	2	ASO_G0223546_02	291	190	101	201	201	0	1	0	1
136	LINC00630	LINC00630	Targeted lncRNA	2	ASO_G0223546_01	3	2	1	29	6	23	1	0	1
137	LINC00654	LINC00654	Targeted lncRNA	1	ASO_G0205181_01	76	65	11	96	91	5	0	0	0
138	NORAD	LINC00657	Targeted lncRNA	2	ASO_G0260032_AD_01	555	404	151	71	48	23	2	1	1
139	NORAD	LINC00657	Targeted lncRNA	2	ASO_G0260032_AD_06	232	96	136	53	53	0	4	3	1
140	LINC00667	LINC00667	Targeted lncRNA	3	ASO_G0263753_AD_01	12	12	0	44	44	0	0	0	0
141	LINC00667	LINC00667	Targeted lncRNA	3	ASO_G0263753_AD_06	12	11	1	18	18	0	2	0	2
142	LINC00674	LINC00674	Targeted lncRNA	3	ASO_G0237854_05	2	2	0	0	0	0	1	1	0
143	LINC00674	LINC00674	Targeted lncRNA	3	ASO_G0237854_AD_02	1	1	0	34	34	0	0	0	0
144	LINC00674	LINC00674	Targeted lncRNA	3	ASO_G0237854_AD_04	3	2	1	6	6	0	0	0	0
145	LINC00702	LINC00702	Targeted lncRNA	2	ASO_G0233117_02	1198	512	686	78	69	9	1	1	0
146	LINC00702	LINC00702	Targeted lncRNA	2	ASO_G0233117_04	4	3	1	24	24	0	1	1	0
147	LINC00707	LINC00707	Targeted lncRNA	2	ASO_G0238266_AD_06	513	254	259	90	87	3	9	4	5
148	LINC00707	LINC00707	Targeted lncRNA	2	ASO_G0238266_03	7	7	0	9	0	9	1	1	0
149	LINC00856	LINC00856	Targeted lncRNA	2	ASO_G0230417_01	401	255	146	8	1	7	6	5	1
150	LINC00856	LINC00856	Targeted lncRNA	2	ASO_G0230417_02	3	2	1	86	2	84	2	2	0
151	LINC00862	LINC00862	Targeted lncRNA	2	ASO_G0203721_02	2005	1058	947	23	23	0	16	6	10
152	LINC00862	LINC00862	Targeted lncRNA	2	ASO_G0203721_05	220	140	80	10	5	5	2	1	1
153	DUBR	LINC00883	Targeted lncRNA	3	ASO_G0243701_01	0	0	0	33	33	0	0	0	0
154	DUBR	LINC00883	Targeted lncRNA	3	ASO_G0243701_AD_09	0	0	0	9	9	0	0	0	0
155	DUBR	LINC00883	Targeted lncRNA	3	ASO_G0243701_AD_08	0	0	0	1	1	0	0	0	0
156	LINC00886	LINC00886	Targeted lncRNA	5	ASO_G0240875_03	465	302	163	71	60	11	2	0	2
157	LINC00886	LINC00886	Targeted lncRNA	5	ASO_G0240875_10	20	6	14	4	1	3	0	0	0
158	LINC00886	LINC00886	Targeted lncRNA	5	ASO_G0240875_02	161	89	72	84	78	6	1	0	1
159	LINC00886	LINC00886	Targeted lncRNA	5	ASO_G0240875_04	8	6	2	30	25	5	0	0	0
160	LINC00886	LINC00886	Targeted lncRNA	5	ASO_G0240875_01	5	2	3	0	0	0	0	0	0
161	LINC00938	LINC00938	Targeted lncRNA	3	ASO_G0273015_AD_07	5	5	0	0	0	0	0	0	0
162	LINC00938	LINC00938	Targeted lncRNA	3	ASO_G0273015_AD_10	0	0	0	6	0	6	0	0	0
163	LINC00938	LINC00938	Targeted lncRNA	3	ASO_G0273015_05	76	32	44	9	2	7	0	0	0
164	C10orf143	LINC00959	Targeted lncRNA	2	ASO_G0237489_AD_01	0	0	0	7	7	0	2	0	2
165	C10orf143	LINC00959	Targeted lncRNA	2	ASO_G0237489_09	49	41	8	0	0	0	2	0	2
166	LINC00963	LINC00963	Targeted lncRNA	3	ASO_G0204054_01	2	2	0	26	2	24	0	0	0
167	LINC00963	LINC00963	Targeted lncRNA	3	ASO_G0204054_06	654	334	320	106	106	0	2	0	2
168	LINC00963	LINC00963	Targeted lncRNA	3	ASO_G0204054_10	1	1	0	72	15	57	1	1	0
169	LINC00968	LINC00968	Targeted lncRNA	2	ASO_G0246430_03	935	630	305	95	78	17	3	0	3
170	LINC00968	LINC00968	Targeted lncRNA	2	ASO_G0246430_AD_03	6	6	0	100	3	97	1	0	1
171	PPM1F-AS1	LL22NC03-86G7.1	Targeted lncRNA	3	ASO_G0224086_04	153	53	100	165	164	1	1	0	1
172	PPM1F-AS1	LL22NC03-86G7.1	Targeted lncRNA	3	ASO_G0224086_03	0	0	0	59	3	56	4	0	4
173	PPM1F-AS1	LL22NC03-86G7.1	Targeted lncRNA	3	ASO_G0224086_06	0	0	0	195	107	88	1	0	1
174	MAGI2-AS3	MAGI2-AS3	Targeted lncRNA	2	ASO_G0234456_04	40	31	9	0	0	0	2	0	2
175	MAGI2-AS3	MAGI2-AS3	Targeted lncRNA	2	ASO_G0234456_01	21	20	1	1	0	1	0	0	0
176	MAPKAPK5-AS1	MAPKAPK5-AS1	Targeted lncRNA	3	ASO_G0234608_AD_04	171	95	76	109	99	10	3	1	2
177	MAPKAPK5-AS1	MAPKAPK5-AS1	Targeted lncRNA	3	ASO_G0234608_AD_01	101	48	53	91	77	14	4	1	3
178	MAPKAPK5-AS1	MAPKAPK5-AS1	Targeted lncRNA	3	ASO_G0234608_06	846	619	227	69	68	1	3	2	1
179	MEG3	MEG3	Targeted lncRNA	3	ASO_G0214548_01	1059	315	744	58	28	30	0	0	0
180	MEG3	MEG3	Targeted lncRNA	3	ASO_G0214548_AD_09	1212	536	676	168	167	1	0	0	0
181	MEG3	MEG3	Targeted lncRNA	3	ASO_G0214548_AD_06	0	0	0	81	81	0	0	0	0
182	MELTF-AS1	MFI2-AS1	Targeted lncRNA	2	ASO_G0228109_06	329	250	79	43	28	15	2	1	1
183	MELTF-AS1	MFI2-AS1	Targeted lncRNA	2	ASO_G0228109_07	591	456	135	30	11	19	12	4	8
184	MKLN1-AS	MKLN1-AS2	Targeted lncRNA	1	ASO_G0236753_AD_01	3	3	0	20	1	19	0	0	0
185	NNT-AS1	NNT-AS1	Targeted lncRNA	1	ASO_G0248092_AD_10	1	1	0	21	0	21	3	2	1
186	NR2F1-AS1	NR2F1-AS1	Targeted lncRNA	4	ASO_G0237187_AD_08	54	2	52	0	0	0	0	0	0
187	NR2F1-AS1	NR2F1-AS1	Targeted lncRNA	4	ASO_G0237187_01	0	0	0	0	0	0	0	0	0
188	NR2F1-AS1	NR2F1-AS1	Targeted lncRNA	4	ASO_G0237187_03	4	4	0	39	39	0	0	0	0
189	NR2F1-AS1	NR2F1-AS1	Targeted lncRNA	4	ASO_G0237187_AD_01	2	2	0	13	0	13	0	0	0
190	PCAT6	PCAT6	Targeted lncRNA	1	ASO_G0228288_01	12	11	1	12	0	12	0	0	0
191	PITPNA-AS1	PITPNA-AS1	Targeted lncRNA	3	ASO_G0236618_AD_07	1	1	0	30	27	3	6	3	3
192	PITPNA-AS1	PITPNA-AS1	Targeted lncRNA	3	ASO_G0236618_AD_09	7	5	2	109	109	0	0	0	0
193	PRRT3-AS1	PRRT3-AS1	Targeted lncRNA	1	ASO_G0230082_01	27	22	5	36	2	34	5	1	4
194	PTCHD3P1	PTCHD3P1	Targeted lncRNA	3	ASO_G0224597_AD_04	588	38	550	144	143	1	0	0	0
195	PTCHD3P1	PTCHD3P1	Targeted lncRNA	3	ASO_G0224597_05	1	1	0	36	36	0	0	0	0
196	PTCHD3P1	PTCHD3P1	Targeted lncRNA	3	ASO_G0224597_06	0	0	0	11	11	0	2	2	0
197	RAB30-DT	RAB30-AS1	Targeted lncRNA	5	ASO_G0246067_AD_06	7031	3482	3549	127	126	1	60	28	32
198	RAB30-DT	RAB30-AS1	Targeted lncRNA	5	ASO_G0246067_01	0	0	0	16	4	12	1	1	0
199	RAB30-DT	RAB30-AS1	Targeted lncRNA	5	ASO_G0246067_AD_04	3	3	0	0	0	0	0	0	0
200	RAB30-DT	RAB30-AS1	Targeted lncRNA	5	ASO_G0246067_AD_09	608	603	5	52	50	2	1	0	1
201	RAB30-DT	RAB30-AS1	Targeted lncRNA	5	ASO_G0246067_05	4	4	0	29	0	29	1	1	0
202	RAD51-AS1	RAD51-AS1	Targeted lncRNA	1	ASO_G0245849_AD_07	15	11	4	16	16	0	0	0	0
203	RP1-152L7.5	RP1-152L7.5	Targeted lncRNA	2	ASO_G0216775_01	9	4	5	22	0	22	6	1	5
204	RP1-152L7.5	RP1-152L7.5	Targeted lncRNA	2	ASO_G0216775_03	0	0	0	42	4	38	1	0	1
205	RP11-10K16.1	RP11-10K16.1	Targeted lncRNA	3	ASO_G0245213_AD_04	19	17	2	1	0	1	3	0	3
206	RP11-10K16.1	RP11-10K16.1	Targeted lncRNA	3	ASO_G0245213_04	7	7	0	0	0	0	2	1	1
207	RP11-10K16.1	RP11-10K16.1	Targeted lncRNA	3	ASO_G0245213_AD_03	9	9	0	7	7	0	0	0	0
208	CCDC84-DT	RP11-110I1.12	Targeted lncRNA	3	ASO_G0255121_02	1	1	0	3	3	0	3	0	3
209	CCDC84-DT	RP11-110I1.12	Targeted lncRNA	3	ASO_G0255121_03	0	0	0	12	0	12	1	1	0
210	CCDC84-DT	RP11-110I1.12	Targeted lncRNA	3	ASO_G0255121_08	2	2	0	0	0	0	3	2	1
211	RP11-115C21.2	RP11-115C21.2	Targeted lncRNA	1	ASO_G0246089_02	31	30	1	48	36	12	1	1	0
212	PPP3CB-AS1	RP11-137L10.6	Targeted lncRNA	2	ASO_G0221817_AD_08	10	6	4	29	4	25	1	1	0
213	PPP3CB-AS1	RP11-137L10.6	Targeted lncRNA	2	ASO_G0221817_04	375	298	77	22	8	14	4	0	4
214	PIGBOS1	RP11-139H15.1	Targeted lncRNA	2	ASO_G0225973_10	2292	1313	979	328	255	73	23	8	15
215	PIGBOS1	RP11-139H15.1	Targeted lncRNA	2	ASO_G0225973_AD_01	312	134	178	163	163	0	4	2	2
216	RP11-149I23.3	RP11-149I23.3	Targeted lncRNA	3	ASO_G0232110_AD_02	0	0	0	10	0	10	0	0	0
217	RP11-149I23.3	RP11-149I23.3	Targeted lncRNA	3	ASO_G0232110_AD_06	3	2	1	175	174	1	1	0	1
218	LINC01605	RP11-150O12.1	Targeted lncRNA	2	ASO_C013368_02	1169	656	513	20	0	20	3	2	1
219	LINC01605	RP11-150O12.1	Targeted lncRNA	2	ASO_C013368_01	77	52	25	217	214	3	2	2	0
220	LMO7-AS1	RP11-173B14.5	Targeted lncRNA	4	ASO_G0261105_AD_05	12	2	10	61	1	60	4	3	1
221	LMO7-AS1	RP11-173B14.5	Targeted lncRNA	4	ASO_G0261105_AD_06	1	1	0	21	2	19	1	0	1
222	LMO7-AS1	RP11-173B14.5	Targeted lncRNA	4	ASO_G0261105_AD_10	13	9	4	38	36	2	3	2	1
223	RP11-195F19.9	RP11-195F19.9	Targeted lncRNA	2	ASO_G0230074_05	2365	1276	1089	63	60	3	9	6	3
224	RP11-195F19.9	RP11-195F19.9	Targeted lncRNA	2	ASO_G0230074_07	255	198	57	39	38	1	1	1	0
225	RP11-220I1.1	RP11-220I1.1	Targeted lncRNA	3	ASO_G0233137_04	17	13	4	27	0	27	2	0	2
226	RP11-220I1.1	RP11-220I1.1	Targeted lncRNA	3	ASO_G0233137_02	213	150	63	34	34	0	3	2	1
227	RP11-220I1.1	RP11-220I1.1	Targeted lncRNA	3	ASO_G0233137_05	2	2	0	3	0	3	0	0	0
228	LINC02454	RP11-221N13.3	Targeted lncRNA	3	ASO_G0256268_AD_06	66	51	15	39	39	0	3	0	3
229	LINC02454	RP11-221N13.3	Targeted lncRNA	3	ASO_G0256268_AD_07	400	209	191	36	30	6	17	15	2
230	LINC02454	RP11-221N13.3	Targeted lncRNA	3	ASO_G0256268_AD_03	2	2	0	0	0	0	6	4	2
231	RP11-295G20.2	RP11-295G20.2	Targeted lncRNA	2	ASO_G0233461_AD_03	2	2	0	25	24	1	1	0	1
232	PRDX6-AS1	RP11-296O14.3	Targeted lncRNA	2	ASO_G0203739_10	2068	1129	939	84	84	0	5	3	2
233	PRDX6-AS1	RP11-296O14.3	Targeted lncRNA	2	ASO_G0203739_AD_03	8	6	2	44	10	34	0	0	0
234	RP11-333E1.1	RP11-333E1.1	Targeted lncRNA	2	ASO_G0261879_AD_07	4	4	0	7	3	4	0	0	0
235	RP11-33B1.1	RP11-33B1.1	Targeted lncRNA	2	ASO_G0245958_AD_07	0	0	0	1	0	1	5	2	3
236	RP11-33B1.1	RP11-33B1.1	Targeted lncRNA	2	ASO_G0245958_AD_04	1	1	0	64	0	64	0	0	0
237	RP11-379H18.1	RP11-379H18.1	Targeted lncRNA	2	ASO_G0271122_05	6	6	0	0	0	0	1	1	0
238	RP11-379H18.1	RP11-379H18.1	Targeted lncRNA	2	ASO_G0271122_06	14	13	1	49	13	36	0	0	0
239	RP11-38L15.3	RP11-38L15.3	Targeted lncRNA	2	ASO_G0231187_07	60	50	10	2	1	1	0	0	0
240	RP11-38L15.3	RP11-38L15.3	Targeted lncRNA	2	ASO_G0231187_02	7213	3960	3253	730	730	0	31	18	13
241	MUC12-AS1	RP11-395B7.4	Targeted lncRNA	2	ASO_G0227053_03	1828	1175	653	112	81	31	13	9	4
242	MUC12-AS1	RP11-395B7.4	Targeted lncRNA	2	ASO_G0227053_04	447	312	135	53	29	24	0	0	0
243	RP11-398K22.12	RP11-398K22.12	Targeted lncRNA	3	ASO_G0229852_05	90	78	12	250	250	0	1	1	0
244	RP11-398K22.12	RP11-398K22.12	Targeted lncRNA	3	ASO_G0229852_03	644	389	255	91	87	4	2	0	2
245	RP11-398K22.12	RP11-398K22.12	Targeted lncRNA	3	ASO_G0229852_AD_01	3	1	2	75	75	0	7	5	2
246	LINC01615	RP11-417E7.1	Targeted lncRNA	3	ASO_G0223485_01	2739	1304	1435	175	174	1	7	4	3
247	LINC01615	RP11-417E7.1	Targeted lncRNA	3	ASO_G0223485_AD_04	2838	2023	815	48	41	7	9	7	2
248	LINC01615	RP11-417E7.1	Targeted lncRNA	3	ASO_G0223485_AD_06	33	5	28	3	0	3	11	6	5
249	LINC01137	RP11-422J8.1	Targeted lncRNA	2	ASO_G0233621_05	723	534	189	261	153	108	4	1	3
250	LINC01137	RP11-422J8.1	Targeted lncRNA	2	ASO_G0233621_01	584	382	202	24	0	24	2	1	1
251	LINC01719	RP11-458D21.1	Targeted lncRNA	2	ASO_G0233396_02	11	11	0	20	20	0	2	2	0
252	LINC01719	RP11-458D21.1	Targeted lncRNA	2	ASO_G0233396_07	6022	3110	2912	382	331	51	29	12	17
253	ZNF213-AS1	RP11-473M20.14	Targeted lncRNA	4	ASO_G0263072_02	2101	1367	734	237	233	4	15	9	6
254	ZNF213-AS1	RP11-473M20.14	Targeted lncRNA	4	ASO_G0263072_01	395	126	269	39	14	25	2	0	2
255	ZNF213-AS1	RP11-473M20.14	Targeted lncRNA	4	ASO_G0263072_05	207	110	97	262	257	5	21	19	2
256	ZNF213-AS1	RP11-473M20.14	Targeted lncRNA	4	ASO_G0263072_06	2566	1540	1026	56	42	14	17	10	7
257	RP11-474B16.1	RP11-474B16.1	Targeted lncRNA	1	ASO_G0257642_01	1	1	0	11	2	9	0	0	0
258	RP11-474P2.4	RP11-474P2.4	Targeted lncRNA	2	ASO_C0019316_01	1	1	0	85	0	85	1	0	1
259	RP11-474P2.4	RP11-474P2.4	Targeted lncRNA	2	ASO_C0019316_08	0	0	0	72	0	72	1	0	1
260	RP11-500C11.3	RP11-500C11.3	Targeted lncRNA	1	ASO_G0272269_06	5	5	0	4	0	4	0	0	0
261	RP11-527D7.1	RP11-527D7.1	Targeted lncRNA	3	ASO_G0225554_02	1	1	0	29	0	29	3	0	3
262	RP11-527D7.1	RP11-527D7.1	Targeted lncRNA	3	ASO_G0225554_AD_04	15	14	1	0	0	0	3	1	2
263	RP11-527D7.1	RP11-527D7.1	Targeted lncRNA	3	ASO_G0225554_AD_06	33	21	12	39	39	0	0	0	0
264	LINC02482	RP11-539L10.3	Targeted lncRNA	2	ASO_G0251580_AD_05	134	96	38	5	5	0	0	0	0
265	LINC02482	RP11-539L10.3	Targeted lncRNA	2	ASO_G0251580_AD_01	0	0	0	29	0	29	0	0	0
266	RP11-545E17.3	RP11-545E17.3	Targeted lncRNA	1	ASO_G0223478_03	198	175	23	73	11	62	2	0	2
267	LNCOG	RP11-54A9.1	Targeted lncRNA	3	ASO_G0257219_AD_10	7	6	1	25	25	0	0	0	0
268	LNCOG	RP11-54A9.1	Targeted lncRNA	3	ASO_G0257219_AD_05	119	95	24	15	6	9	1	1	0
269	LNCOG	RP11-54A9.1	Targeted lncRNA	3	ASO_G0257219_09	6	6	0	0	0	0	0	0	0
270	RP11-553K8.5	RP11-553K8.5	Targeted lncRNA	5	ASO_G0261573_AD_04	3871	2165	1706	230	216	14	0	0	0
271	RP11-553K8.5	RP11-553K8.5	Targeted lncRNA	5	ASO_G0261573_AD_06	0	0	0	0	0	0	2	1	1
272	PRANCR	RP11-611E13.2	Targeted lncRNA	2	ASO_G0257815_AD_03	57	26	31	80	1	79	0	0	0
273	PRANCR	RP11-611E13.2	Targeted lncRNA	2	ASO_G0257815_01	95	56	39	147	52	95	1	0	1
274	NBDY	RP11-622K12.1	Targeted lncRNA	2	ASO_G0204272_04	2	2	0	17	0	17	0	0	0
275	NBDY	RP11-622K12.1	Targeted lncRNA	2	ASO_G0204272_03	1	1	0	12	5	7	1	0	1
276	LINC01503	RP11-65J3.1	Targeted lncRNA	3	ASO_G0233901_05	3268	1859	1409	132	120	12	17	9	8
277	LINC01503	RP11-65J3.1	Targeted lncRNA	3	ASO_G0233901_02	2	2	0	47	0	47	2	2	0
278	LINC01503	RP11-65J3.1	Targeted lncRNA	3	ASO_G0233901_04	179	123	56	18	3	15	1	0	1
279	RP11-660L16.2	RP11-660L16.2	Targeted lncRNA	2	ASO_G0254682_02	485	253	232	20	0	20	4	1	3
280	RP11-660L16.2	RP11-660L16.2	Targeted lncRNA	2	ASO_G0254682_06	103	86	17	1	0	1	2	1	1
281	RP11-6N17.4	RP11-6N17.4	Targeted lncRNA	2	ASO_G0264920_AD_02	9	4	5	4	2	2	7	5	2
282	LINC02381	RP11-834C11.4	Targeted lncRNA	3	ASO_G0250742_AD_04	22	21	1	0	0	0	1	0	1
283	LINC02381	RP11-834C11.4	Targeted lncRNA	3	ASO_G0250742_AD_05	1	1	0	1	0	1	0	0	0
284	LINC02381	RP11-834C11.4	Targeted lncRNA	3	ASO_G0250742_01	0	0	0	0	0	0	0	0	0
285	SRP54-AS1	RP11-85K15.2	Targeted lncRNA	1	ASO_G0258704_09	23	21	2	57	0	57	0	0	0
286	RP13-20L14.6	RP13-20L14.6	Targeted lncRNA	2	ASO_G0265458_AD_03	3577	2170	1407	138	137	1	9	3	6
287	LASTR	RP13-463N16.6	Targeted lncRNA	2	ASO_G0242147_05	30	30	0	44	44	0	2	2	0
288	LASTR	RP13-463N16.6	Targeted lncRNA	2	ASO_G0242147_07	1883	1178	705	374	190	184	20	5	15
289	MIR34AHG	RP3-510D11.1	Targeted lncRNA	1	ASO_G0228526_10	12	8	4	57	1	56	0	0	0
290	LNCTAM34A	RP3-510D11.2	Targeted lncRNA	3	ASO_G0234546_07	158	117	41	86	86	0	6	4	2
291	LNCTAM34A	RP3-510D11.2	Targeted lncRNA	3	ASO_G0234546_01	0	0	0	0	0	0	0	0	0
292	LNCTAM34A	RP3-510D11.2	Targeted lncRNA	3	ASO_G0234546_02	13	8	5	19	19	0	2	1	1
293	INKA2-AS1	RP4-773A18.4	Targeted lncRNA	1	ASO_G0227811_06	85	66	19	322	303	19	2	0	2
294	NRSN2-AS1	RP5-1103G7.4	Targeted lncRNA	2	ASO_G0225377_AD_05	0	0	0	4	1	3	1	0	1
295	NRSN2-AS1	RP5-1103G7.4	Targeted lncRNA	2	ASO_G0225377_05	4080	2254	1826	98	49	49	21	12	9
296	ELOA-AS1	RP5-886K2.3	Targeted lncRNA	2	ASO_G0236810_AD_02	2	2	0	14	13	1	1	0	1
297	ELOA-AS1	RP5-886K2.3	Targeted lncRNA	2	ASO_G0236810_AD_06	7	1	6	6	0	6	1	0	1
298	PRR34-AS1	RP6-109B7.3	Targeted lncRNA	2	ASO_G0241990_01	3	2	1	4	0	4	0	0	0
299	PRR34-AS1	RP6-109B7.3	Targeted lncRNA	2	ASO_G0241990_07	0	0	0	3	3	0	0	0	0
300	MIR222HG	RP6-99M1.2	Targeted lncRNA	2	ASO_G0270069_05	1	1	0	1	1	0	0	0	0
301	MIR222HG	RP6-99M1.2	Targeted lncRNA	2	ASO_G0270069_AD_07	0	0	0	2	0	2	0	0	0
302	SBF2-AS1	SBF2-AS1	Targeted lncRNA	1	ASO_G0246273_02	762	496	266	8	2	6	1	1	0
303	SERTAD4-AS1	SERTAD4-AS1	Targeted lncRNA	1	ASO_G0203706_01	534	274	260	53	53	0	4	0	4
304	SNHG18	SNHG18	Targeted lncRNA	2	ASO_G0250786_AD_10	9	7	2	22	19	3	2	1	1
305	SNHG18	SNHG18	Targeted lncRNA	2	ASO_G0250786_04	0	0	0	0	0	0	0	0	0
306	SOCS2-AS1	SOCS2-AS1	Targeted lncRNA	3	ASO_G0246985_AD_04	6	5	1	56	55	1	1	0	1
307	SOCS2-AS1	SOCS2-AS1	Targeted lncRNA	3	ASO_G0246985_AD_01	28	14	14	47	35	12	1	0	1
308	SOCS2-AS1	SOCS2-AS1	Targeted lncRNA	3	ASO_G0246985_10	349	216	133	3	1	2	4	0	4
309	SRP14-AS1	SRP14-AS1	Targeted lncRNA	2	ASO_G0248508_10	439	194	245	28	18	10	2	0	2
310	SRP14-AS1	SRP14-AS1	Targeted lncRNA	2	ASO_G0248508_04	363	248	115	91	18	73	3	0	3
311	SUGT1P1	SUGT1P	Targeted lncRNA	2	ASO_G0226823_03	37	26	11	95	6	89	3	1	2
312	SUGT1P1	SUGT1P	Targeted lncRNA	2	ASO_G0226823_08	44	40	4	24	0	24	4	0	4
313	TERC	TERC	Targeted lncRNA	2	ASO_G0270141_AD_10	1	1	0	13	3	10	0	0	0
314	TERC	TERC	Targeted lncRNA	2	ASO_G0270141_05	123	45	78	18	0	18	3	2	1
315	TMCC1-AS1	TMCC1-AS1	Targeted lncRNA	2	ASO_G0271270_AD_10	11	9	2	0	0	0	2	2	0
316	TMCC1-AS1	TMCC1-AS1	Targeted lncRNA	2	ASO_G0271270_09	743	540	203	30	30	0	2	1	1
317	TP53TG1	TP53TG1	Targeted lncRNA	3	ASO_G0182165_AD_04	3	3	0	34	12	22	1	1	0
318	TP53TG1	TP53TG1	Targeted lncRNA	3	ASO_G0182165_AD_10	2	2	0	21	21	0	0	0	0
319	TP53TG1	TP53TG1	Targeted lncRNA	3	ASO_G0182165_AD_08	6	6	0	57	57	0	0	0	0
320	TRAM2-AS1	TRAM2-AS1	Targeted lncRNA	2	ASO_G0225791_AD_05	2	1	1	0	0	0	2	2	0
321	TRAM2-AS1	TRAM2-AS1	Targeted lncRNA	2	ASO_G0225791_05	3	3	0	19	6	13	0	0	0
322	TTN-AS1	TTN-AS1	Targeted lncRNA	2	ASO_G0237298_01	2	2	0	0	0	0	7	2	5
323	TTN-AS1	TTN-AS1	Targeted lncRNA	2	ASO_G0237298_09	36	32	4	1	0	1	0	0	0
324	TUG1	TUG1	Targeted lncRNA	5	ASO_G0253352_02	17	13	4	66	0	66	5	5	0
325	TUG1	TUG1	Targeted lncRNA	5	ASO_G0253352_06	0	0	0	25	20	5	3	3	0
326	TUG1	TUG1	Targeted lncRNA	5	ASO_G0253352_AD_08	2	2	0	6	2	4	3	2	1
327	TUG1	TUG1	Targeted lncRNA	5	ASO_G0253352_01	12	11	1	116	6	110	5	5	0
328	TUG1	TUG1	Targeted lncRNA	5	ASO_G0253352_AD_07	86	83	3	148	93	55	1	1	0
329	U52111.14	U52111.14	Targeted lncRNA	2	ASO_G0232725_05	0	0	0	7	1	6	5	2	3
330	U52111.14	U52111.14	Targeted lncRNA	2	ASO_G0232725_AD_10	0	0	0	2	2	0	0	0	0
331	UBL7-AS1	UBL7-AS1	Targeted lncRNA	2	ASO_G0247240_AD_05	1	1	0	6	0	6	1	1	0
332	UBL7-AS1	UBL7-AS1	Targeted lncRNA	2	ASO_G0247240_AD_06	13	9	4	46	3	43	1	0	1
333	WDFY3-AS2	WDFY3-AS2	Targeted lncRNA	3	ASO_G0180769_AD_03	2	1	1	5	0	5	1	1	0
334	WDFY3-AS2	WDFY3-AS2	Targeted lncRNA	3	ASO_G0180769_03	1	0	1	6	5	1	0	0	0
335	WDFY3-AS2	WDFY3-AS2	Targeted lncRNA	3	ASO_G0180769_08	6	6	0	1	0	1	3	1	2
336	ZNF37BP	ZNF37BP	Targeted lncRNA	1	ASO_G0234420_01	71	50	21	0	0	0	1	0	1
337	ZNF674-AS1	ZNF674-AS1	Targeted lncRNA	2	ASO_G0230844_01	879	553	326	37	22	15	9	3	6
338	ZNF674-AS1	ZNF674-AS1	Targeted lncRNA	2	ASO_G0230844_AD_06	0	0	0	0	0	0	1	0	1
339	ZSCAN16-AS1	ZSCAN16-AS1	Targeted lncRNA	2	ASO_G0269293_01	1	0	1	20	18	2	0	0	0
340	ZSCAN16-AS1	ZSCAN16-AS1	Targeted lncRNA	2	ASO_G0269293_AD_10	3	1	2	63	0	63	2	1	1

## Sheet: Table S5B
	pub.pair_id	pair_id	KD.geneSymbol	DEGs_comn	DEGs_comn_down	DEGs_comn_up	GSEA_comn	GSEA_comn_down	GSEA_comn_up	MARA_comn	MARA_comn_down	MARA_comn_up
1	A1BG-AS1-ASO_01|ASO_03	A1BG-AS1-ASO_01|ASO_03	A1BG-AS1	203	106	97	5	4	1	0	0	0
2	AC004980.7-ASO_01|ASO_03	AC004980.7-ASO_01|ASO_03	AC004980.7	3	3	0	1	0	1	0	0	0
3	SPRY4-AS1-ASO_02|ASO_03	AC005592.2-ASO_02|ASO_03	AC005592.2	79	45	34	1	1	0	2	2	0
4	MAP4K3-DT-ASO_02|ASO_04	AC007246.3-ASO_02|ASO_04	AC007246.3	1	1	0	1	0	1	1	0	1
5	MYOSLID-ASO_06|ASO_AD_09	AC007879.7-ASO_06|ASO_AD_09	AC007879.7	0	0	0	0	0	0	0	0	0
6	CHROMR-ASO_08|ASO_AD_10	AC009948.5-ASO_08|ASO_AD_10	AC009948.5	1	1	0	0	0	0	0	0	0
7	ZNF232-AS1-ASO_01|ASO_07	AC012146.7-ASO_01|ASO_07	AC012146.7	0	0	0	0	0	0	0	0	0
8	LINC01578-ASO_04|ASO_AD_07	AC013394.2-ASO_04|ASO_AD_07	AC013394.2	0	0	0	0	0	0	0	0	0
9	LINC01578-ASO_04|ASO_AD_10	AC013394.2-ASO_04|ASO_AD_10	AC013394.2	0	0	0	0	0	0	0	0	0
10	LINC01578-ASO_AD_07|ASO_AD_10	AC013394.2-ASO_AD_07|ASO_AD_10	AC013394.2	3	2	1	0	0	0	0	0	0
11	AC016747.3-ASO_01|ASO_02	AC016747.3-ASO_01|ASO_02	AC016747.3	1	1	0	1	0	1	0	0	0
12	AC016747.3-ASO_01|ASO_03	AC016747.3-ASO_01|ASO_03	AC016747.3	2	2	0	0	0	0	0	0	0
13	AC016747.3-ASO_01|ASO_04	AC016747.3-ASO_01|ASO_04	AC016747.3	0	0	0	0	0	0	0	0	0
14	AC016747.3-ASO_02|ASO_03	AC016747.3-ASO_02|ASO_03	AC016747.3	11	7	4	67	64	3	0	0	0
15	AC016747.3-ASO_02|ASO_04	AC016747.3-ASO_02|ASO_04	AC016747.3	0	0	0	9	9	0	1	0	1
16	AC016747.3-ASO_03|ASO_04	AC016747.3-ASO_03|ASO_04	AC016747.3	0	0	0	6	6	0	0	0	0
17	LINC01116-ASO_04|ASO_06	AC017048.3-ASO_04|ASO_06	AC017048.3	0	0	0	1	1	0	0	0	0
18	LINC01116-ASO_04|ASO_AD_01	AC017048.3-ASO_04|ASO_AD_01	AC017048.3	0	0	0	0	0	0	0	0	0
19	LINC01116-ASO_06|ASO_AD_01	AC017048.3-ASO_06|ASO_AD_01	AC017048.3	2	2	0	0	0	0	0	0	0
20	LINC01117-ASO_01|ASO_02	AC017048.4-ASO_01|ASO_02	AC017048.4	9	8	1	0	0	0	0	0	0
21	LINC01117-ASO_01|ASO_05	AC017048.4-ASO_01|ASO_05	AC017048.4	0	0	0	0	0	0	0	0	0
22	LINC01117-ASO_01|ASO_AD_05	AC017048.4-ASO_01|ASO_AD_05	AC017048.4	0	0	0	0	0	0	0	0	0
23	LINC01117-ASO_02|ASO_05	AC017048.4-ASO_02|ASO_05	AC017048.4	1	1	0	0	0	0	0	0	0
24	LINC01117-ASO_02|ASO_AD_05	AC017048.4-ASO_02|ASO_AD_05	AC017048.4	13	3	10	0	0	0	0	0	0
25	LINC01117-ASO_05|ASO_AD_05	AC017048.4-ASO_05|ASO_AD_05	AC017048.4	0	0	0	0	0	0	0	0	0
26	ZFAND2A-DT-ASO_07|ASO_AD_04	AC091729.9-ASO_07|ASO_AD_04	AC091729.9	0	0	0	0	0	0	0	0	0
27	ZNF529-AS1-ASO_02|ASO_03	AC092295.7-ASO_02|ASO_03	AC092295.7	1	1	0	0	0	0	0	0	0
28	ZNF529-AS1-ASO_02|ASO_07	AC092295.7-ASO_02|ASO_07	AC092295.7	0	0	0	0	0	0	0	0	0
29	ZNF529-AS1-ASO_03|ASO_07	AC092295.7-ASO_03|ASO_07	AC092295.7	0	0	0	0	0	0	2	0	2
30	RNASEH1-AS1-ASO_01|ASO_02	AC108488.3-ASO_01|ASO_02	AC108488.3	5	5	0	0	0	0	0	0	0
31	RNASEH1-AS1-ASO_01|ASO_03	AC108488.3-ASO_01|ASO_03	AC108488.3	1	1	0	0	0	0	0	0	0
32	RNASEH1-AS1-ASO_01|ASO_06	AC108488.3-ASO_01|ASO_06	AC108488.3	3	3	0	4	0	4	0	0	0
33	RNASEH1-AS1-ASO_01|ASO_09	AC108488.3-ASO_01|ASO_09	AC108488.3	5	5	0	2	0	2	0	0	0
34	RNASEH1-AS1-ASO_02|ASO_03	AC108488.3-ASO_02|ASO_03	AC108488.3	1	1	0	0	0	0	0	0	0
35	RNASEH1-AS1-ASO_02|ASO_06	AC108488.3-ASO_02|ASO_06	AC108488.3	54	44	10	0	0	0	0	0	0
36	RNASEH1-AS1-ASO_02|ASO_09	AC108488.3-ASO_02|ASO_09	AC108488.3	158	99	59	5	5	0	0	0	0
37	RNASEH1-AS1-ASO_03|ASO_06	AC108488.3-ASO_03|ASO_06	AC108488.3	1	1	0	0	0	0	0	0	0
38	RNASEH1-AS1-ASO_03|ASO_09	AC108488.3-ASO_03|ASO_09	AC108488.3	1	1	0	0	0	0	0	0	0
39	RNASEH1-AS1-ASO_06|ASO_09	AC108488.3-ASO_06|ASO_09	AC108488.3	39	19	20	0	0	0	0	0	0
40	AMZ2P1-ASO_02|ASO_06	AMZ2P1-ASO_02|ASO_06	AMZ2P1	1	1	0	0	0	0	0	0	0
41	BX322557.10-ASO_01|ASO_03	BX322557.10-ASO_01|ASO_03	BX322557.10	0	0	0	1	0	1	0	0	0
42	CATG00000016989.1-ASO_03|ASO_06	CATG00000016989.1-ASO_03|ASO_06	CATG00000016989.1	0	0	0	0	0	0	0	0	0
43	CATG00000020700.1-ASO_02|ASO_09	CATG00000020700.1-ASO_02|ASO_09	CATG00000020700.1	0	0	0	0	0	0	0	0	0
44	CATG00000089639.1-ASO_04|ASO_06	CATG00000089639.1-ASO_04|ASO_06	CATG00000089639.1	0	0	0	9	9	0	0	0	0
45	CATG00000095991.1-ASO_07|ASO_AD_02	CATG00000095991.1-ASO_07|ASO_AD_02	CATG00000095991.1	1	1	0	1	0	1	0	0	0
46	CATG00000095991.1-ASO_07|ASO_AD_04	CATG00000095991.1-ASO_07|ASO_AD_04	CATG00000095991.1	0	0	0	1	0	1	0	0	0
47	CATG00000095991.1-ASO_07|ASO_AD_05	CATG00000095991.1-ASO_07|ASO_AD_05	CATG00000095991.1	9	5	4	10	0	10	0	0	0
48	CATG00000095991.1-ASO_AD_02|ASO_AD_04	CATG00000095991.1-ASO_AD_02|ASO_AD_04	CATG00000095991.1	0	0	0	12	4	8	0	0	0
49	CATG00000095991.1-ASO_AD_02|ASO_AD_05	CATG00000095991.1-ASO_AD_02|ASO_AD_05	CATG00000095991.1	3	2	1	6	1	5	0	0	0
50	CATG00000095991.1-ASO_AD_04|ASO_AD_05	CATG00000095991.1-ASO_AD_04|ASO_AD_05	CATG00000095991.1	0	0	0	32	1	31	0	0	0
51	CD99P1-ASO_05|ASO_06	CD99P1-ASO_05|ASO_06	CD99P1	0	0	0	0	0	0	1	0	1
52	CD99P1-ASO_05|ASO_07	CD99P1-ASO_05|ASO_07	CD99P1	0	0	0	0	0	0	0	0	0
53	CD99P1-ASO_06|ASO_07	CD99P1-ASO_06|ASO_07	CD99P1	0	0	0	1	0	1	0	0	0
54	CKMT2-AS1-ASO_08|ASO_09	CKMT2-AS1-ASO_08|ASO_09	CKMT2-AS1	0	0	0	0	0	0	3	1	2
55	MIATNB-ASO_04|ASO_09	CTA-211A9.5-ASO_04|ASO_09	CTA-211A9.5	0	0	0	0	0	0	0	0	0
56	MIATNB-ASO_04|ASO_AD_08	CTA-211A9.5-ASO_04|ASO_AD_08	CTA-211A9.5	0	0	0	0	0	0	0	0	0
57	MIATNB-ASO_04|ASO_AD_09	CTA-211A9.5-ASO_04|ASO_AD_09	CTA-211A9.5	0	0	0	0	0	0	0	0	0
58	MIATNB-ASO_09|ASO_AD_08	CTA-211A9.5-ASO_09|ASO_AD_08	CTA-211A9.5	0	0	0	0	0	0	0	0	0
59	MIATNB-ASO_09|ASO_AD_09	CTA-211A9.5-ASO_09|ASO_AD_09	CTA-211A9.5	0	0	0	0	0	0	0	0	0
60	MIATNB-ASO_AD_08|ASO_AD_09	CTA-211A9.5-ASO_AD_08|ASO_AD_09	CTA-211A9.5	1	1	0	23	23	0	1	0	1
61	LINC01184-ASO_01|ASO_AD_02	CTC-228N24.3-ASO_01|ASO_AD_02	CTC-228N24.3	1	1	0	0	0	0	0	0	0
62	LINC01184-ASO_01|ASO_AD_05	CTC-228N24.3-ASO_01|ASO_AD_05	CTC-228N24.3	1	1	0	0	0	0	0	0	0
63	LINC01184-ASO_AD_02|ASO_AD_05	CTC-228N24.3-ASO_AD_02|ASO_AD_05	CTC-228N24.3	1	1	0	0	0	0	0	0	0
64	ZNF56-ASO_AD_04|ASO_AD_06	CTC-559E9.6-ASO_AD_04|ASO_AD_06	CTC-559E9.6	1	1	0	0	0	0	0	0	0
65	ZNF433-AS1-ASO_08|ASO_AD_04	CTD-2006C1.2-ASO_08|ASO_AD_04	CTD-2006C1.2	0	0	0	0	0	0	0	0	0
66	ZNF433-AS1-ASO_08|ASO_AD_08	CTD-2006C1.2-ASO_08|ASO_AD_08	CTD-2006C1.2	0	0	0	0	0	0	0	0	0
67	ZNF433-AS1-ASO_AD_04|ASO_AD_08	CTD-2006C1.2-ASO_AD_04|ASO_AD_08	CTD-2006C1.2	1	1	0	0	0	0	0	0	0
68	CTD-2319I12.4-ASO_AD_03|ASO_AD_07	CTD-2319I12.4-ASO_AD_03|ASO_AD_07	CTD-2319I12.4	0	0	0	88	88	0	0	0	0
69	CTD-2587H24.5-ASO_01|ASO_03	CTD-2587H24.5-ASO_01|ASO_03	CTD-2587H24.5	2072	1380	692	36	36	0	3	1	2
70	CTD-2651B20.3-ASO_AD_04|ASO_AD_08	CTD-2651B20.3-ASO_AD_04|ASO_AD_08	CTD-2651B20.3	0	0	0	0	0	0	1	0	1
71	ZNF528-AS1-ASO_02|ASO_AD_02	CTD-3018O17.3-ASO_02|ASO_AD_02	CTD-3018O17.3	3	3	0	0	0	0	0	0	0
72	ZNF528-AS1-ASO_02|ASO_AD_06	CTD-3018O17.3-ASO_02|ASO_AD_06	CTD-3018O17.3	0	0	0	0	0	0	0	0	0
73	ZNF528-AS1-ASO_AD_02|ASO_AD_06	CTD-3018O17.3-ASO_AD_02|ASO_AD_06	CTD-3018O17.3	0	0	0	0	0	0	0	0	0
74	DANCR-ASO_02|ASO_04	DANCR-ASO_02|ASO_04	DANCR	0	0	0	0	0	0	0	0	0
75	DANCR-ASO_02|ASO_05	DANCR-ASO_02|ASO_05	DANCR	0	0	0	11	7	4	0	0	0
76	DANCR-ASO_02|ASO_AD_07	DANCR-ASO_02|ASO_AD_07	DANCR	0	0	0	2	1	1	0	0	0
77	DANCR-ASO_04|ASO_05	DANCR-ASO_04|ASO_05	DANCR	2	0	2	0	0	0	0	0	0
78	DANCR-ASO_04|ASO_AD_07	DANCR-ASO_04|ASO_AD_07	DANCR	0	0	0	0	0	0	0	0	0
79	DANCR-ASO_05|ASO_AD_07	DANCR-ASO_05|ASO_AD_07	DANCR	1	1	0	0	0	0	0	0	0
80	DNAJC27-AS1-ASO_10|ASO_AD_07	DNAJC27-AS1-ASO_10|ASO_AD_07	DNAJC27-AS1	0	0	0	0	0	0	0	0	0
81	DNM3OS-ASO_AD_04|ASO_AD_10	DNM3OS-ASO_AD_04|ASO_AD_10	DNM3OS	0	0	0	0	0	0	0	0	0
82	EMX2OS-ASO_01|ASO_03	EMX2OS-ASO_01|ASO_03	EMX2OS	2	1	1	1	1	0	1	1	0
83	EMX2OS-ASO_01|ASO_AD_02	EMX2OS-ASO_01|ASO_AD_02	EMX2OS	2	2	0	4	4	0	0	0	0
84	EMX2OS-ASO_01|ASO_AD_04	EMX2OS-ASO_01|ASO_AD_04	EMX2OS	3	0	3	0	0	0	0	0	0
85	EMX2OS-ASO_03|ASO_AD_02	EMX2OS-ASO_03|ASO_AD_02	EMX2OS	4	4	0	1	0	1	0	0	0
86	EMX2OS-ASO_03|ASO_AD_04	EMX2OS-ASO_03|ASO_AD_04	EMX2OS	11	1	10	0	0	0	0	0	0
87	EMX2OS-ASO_AD_02|ASO_AD_04	EMX2OS-ASO_AD_02|ASO_AD_04	EMX2OS	331	329	2	3	2	1	0	0	0
88	ERVK13-1-ASO_AD_06|ASO_AD_08	ERVK13-1-ASO_AD_06|ASO_AD_08	ERVK13-1	0	0	0	0	0	0	0	0	0
89	ERVK3-1-ASO_AD_01|ASO_AD_07	ERVK3-1-ASO_AD_01|ASO_AD_07	ERVK3-1	43	4	39	69	69	0	0	0	0
90	FGD5-AS1-ASO_03|ASO_04	FGD5-AS1-ASO_03|ASO_04	FGD5-AS1	9	9	0	0	0	0	0	0	0
91	FGD5-AS1-ASO_03|ASO_AD_03	FGD5-AS1-ASO_03|ASO_AD_03	FGD5-AS1	0	0	0	0	0	0	0	0	0
92	FGD5-AS1-ASO_03|ASO_AD_06	FGD5-AS1-ASO_03|ASO_AD_06	FGD5-AS1	0	0	0	0	0	0	0	0	0
93	FGD5-AS1-ASO_04|ASO_AD_03	FGD5-AS1-ASO_04|ASO_AD_03	FGD5-AS1	17	11	6	11	11	0	0	0	0
94	FGD5-AS1-ASO_04|ASO_AD_06	FGD5-AS1-ASO_04|ASO_AD_06	FGD5-AS1	2	2	0	0	0	0	0	0	0
95	FGD5-AS1-ASO_AD_03|ASO_AD_06	FGD5-AS1-ASO_AD_03|ASO_AD_06	FGD5-AS1	8	7	1	11	8	3	0	0	0
96	FLVCR1-DT-ASO_01|ASO_03	FLVCR1-AS1-ASO_01|ASO_03	FLVCR1-AS1	0	0	0	0	0	0	0	0	0
97	FLVCR1-DT-ASO_01|ASO_07	FLVCR1-AS1-ASO_01|ASO_07	FLVCR1-AS1	0	0	0	0	0	0	0	0	0
98	FLVCR1-DT-ASO_03|ASO_07	FLVCR1-AS1-ASO_03|ASO_07	FLVCR1-AS1	0	0	0	0	0	0	0	0	0
99	FTX-ASO_02|ASO_05	FTX-ASO_02|ASO_05	FTX	0	0	0	10	10	0	0	0	0
100	FTX-ASO_02|ASO_06	FTX-ASO_02|ASO_06	FTX	0	0	0	0	0	0	0	0	0
101	FTX-ASO_02|ASO_AD_02	FTX-ASO_02|ASO_AD_02	FTX	2	2	0	11	11	0	0	0	0
102	FTX-ASO_02|ASO_AD_03	FTX-ASO_02|ASO_AD_03	FTX	0	0	0	0	0	0	0	0	0
103	FTX-ASO_05|ASO_06	FTX-ASO_05|ASO_06	FTX	1	1	0	2	0	2	0	0	0
104	FTX-ASO_05|ASO_AD_02	FTX-ASO_05|ASO_AD_02	FTX	0	0	0	16	11	5	0	0	0
105	FTX-ASO_05|ASO_AD_03	FTX-ASO_05|ASO_AD_03	FTX	0	0	0	0	0	0	0	0	0
106	FTX-ASO_06|ASO_AD_02	FTX-ASO_06|ASO_AD_02	FTX	0	0	0	16	0	16	0	0	0
107	FTX-ASO_06|ASO_AD_03	FTX-ASO_06|ASO_AD_03	FTX	0	0	0	4	0	4	0	0	0
108	FTX-ASO_AD_02|ASO_AD_03	FTX-ASO_AD_02|ASO_AD_03	FTX	5	5	0	5	3	2	0	0	0
109	JPX-ASO_05|ASO_AD_04	JPX-ASO_05|ASO_AD_04	JPX	1	1	0	0	0	0	0	0	0
110	KTN1-AS1-ASO_03|ASO_04	KTN1-AS1-ASO_03|ASO_04	KTN1-AS1	1	1	0	0	0	0	0	0	0
111	KTN1-AS1-ASO_03|ASO_09	KTN1-AS1-ASO_03|ASO_09	KTN1-AS1	0	0	0	0	0	0	0	0	0
112	KTN1-AS1-ASO_04|ASO_09	KTN1-AS1-ASO_04|ASO_09	KTN1-AS1	0	0	0	0	0	0	0	0	0
113	LINC00339-ASO_04|ASO_AD_03	LINC00339-ASO_04|ASO_AD_03	LINC00339	0	0	0	5	5	0	0	0	0
114	LINC00339-ASO_04|ASO_AD_06	LINC00339-ASO_04|ASO_AD_06	LINC00339	1	1	0	0	0	0	0	0	0
115	LINC00339-ASO_AD_03|ASO_AD_06	LINC00339-ASO_AD_03|ASO_AD_06	LINC00339	156	6	150	39	39	0	0	0	0
116	LINC00511-ASO_04|ASO_AD_07	LINC00511-ASO_04|ASO_AD_07	LINC00511	0	0	0	0	0	0	0	0	0
117	LINC00517-ASO_01|ASO_AD_04	LINC00517-ASO_01|ASO_AD_04	LINC00517	1	1	0	0	0	0	0	0	0
118	LINC00517-ASO_01|ASO_AD_10	LINC00517-ASO_01|ASO_AD_10	LINC00517	0	0	0	0	0	0	0	0	0
119	LINC00517-ASO_AD_04|ASO_AD_10	LINC00517-ASO_AD_04|ASO_AD_10	LINC00517	0	0	0	0	0	0	0	0	0
120	LINC00630-ASO_01|ASO_02	LINC00630-ASO_01|ASO_02	LINC00630	0	0	0	6	6	0	0	0	0
121	NORAD-ASO_AD_01|ASO_AD_06	LINC00657-ASO_AD_01|ASO_AD_06	LINC00657	6	5	1	2	2	0	1	0	1
122	LINC00667-ASO_AD_01|ASO_AD_06	LINC00667-ASO_AD_01|ASO_AD_06	LINC00667	1	1	0	13	13	0	0	0	0
123	LINC00674-ASO_05|ASO_AD_02	LINC00674-ASO_05|ASO_AD_02	LINC00674	1	1	0	0	0	0	0	0	0
124	LINC00674-ASO_05|ASO_AD_04	LINC00674-ASO_05|ASO_AD_04	LINC00674	1	1	0	0	0	0	0	0	0
125	LINC00674-ASO_AD_02|ASO_AD_04	LINC00674-ASO_AD_02|ASO_AD_04	LINC00674	1	1	0	1	1	0	0	0	0
126	LINC00702-ASO_02|ASO_04	LINC00702-ASO_02|ASO_04	LINC00702	1	0	1	1	1	0	0	0	0
127	LINC00707-ASO_03|ASO_AD_06	LINC00707-ASO_03|ASO_AD_06	LINC00707	0	0	0	0	0	0	0	0	0
128	LINC00856-ASO_01|ASO_02	LINC00856-ASO_01|ASO_02	LINC00856	2	1	1	5	0	5	0	0	0
129	LINC00862-ASO_02|ASO_05	LINC00862-ASO_02|ASO_05	LINC00862	46	30	16	0	0	0	0	0	0
130	DUBR-ASO_01|ASO_AD_08	LINC00883-ASO_01|ASO_AD_08	LINC00883	0	0	0	1	1	0	0	0	0
131	DUBR-ASO_01|ASO_AD_09	LINC00883-ASO_01|ASO_AD_09	LINC00883	0	0	0	0	0	0	0	0	0
132	DUBR-ASO_AD_08|ASO_AD_09	LINC00883-ASO_AD_08|ASO_AD_09	LINC00883	0	0	0	0	0	0	0	0	0
133	LINC00886-ASO_01|ASO_02	LINC00886-ASO_01|ASO_02	LINC00886	0	0	0	0	0	0	0	0	0
134	LINC00886-ASO_01|ASO_03	LINC00886-ASO_01|ASO_03	LINC00886	0	0	0	0	0	0	0	0	0
135	LINC00886-ASO_01|ASO_04	LINC00886-ASO_01|ASO_04	LINC00886	0	0	0	0	0	0	0	0	0
136	LINC00886-ASO_01|ASO_10	LINC00886-ASO_01|ASO_10	LINC00886	0	0	0	0	0	0	0	0	0
137	LINC00886-ASO_02|ASO_03	LINC00886-ASO_02|ASO_03	LINC00886	18	5	13	3	2	1	0	0	0
138	LINC00886-ASO_02|ASO_04	LINC00886-ASO_02|ASO_04	LINC00886	2	1	1	3	0	3	0	0	0
139	LINC00886-ASO_02|ASO_10	LINC00886-ASO_02|ASO_10	LINC00886	5	0	5	0	0	0	0	0	0
140	LINC00886-ASO_03|ASO_04	LINC00886-ASO_03|ASO_04	LINC00886	1	1	0	0	0	0	0	0	0
141	LINC00886-ASO_03|ASO_10	LINC00886-ASO_03|ASO_10	LINC00886	4	0	4	1	1	0	0	0	0
142	LINC00886-ASO_04|ASO_10	LINC00886-ASO_04|ASO_10	LINC00886	0	0	0	0	0	0	0	0	0
143	LINC00938-ASO_05|ASO_AD_07	LINC00938-ASO_05|ASO_AD_07	LINC00938	0	0	0	0	0	0	0	0	0
144	LINC00938-ASO_05|ASO_AD_10	LINC00938-ASO_05|ASO_AD_10	LINC00938	0	0	0	0	0	0	0	0	0
145	LINC00938-ASO_AD_07|ASO_AD_10	LINC00938-ASO_AD_07|ASO_AD_10	LINC00938	0	0	0	0	0	0	0	0	0
146	C10orf143-ASO_09|ASO_AD_01	LINC00959-ASO_09|ASO_AD_01	LINC00959	0	0	0	0	0	0	0	0	0
147	LINC00963-ASO_01|ASO_06	LINC00963-ASO_01|ASO_06	LINC00963	1	1	0	0	0	0	0	0	0
148	LINC00963-ASO_01|ASO_10	LINC00963-ASO_01|ASO_10	LINC00963	0	0	0	25	2	23	0	0	0
149	LINC00963-ASO_06|ASO_10	LINC00963-ASO_06|ASO_10	LINC00963	0	0	0	2	2	0	0	0	0
150	LINC00968-ASO_03|ASO_AD_03	LINC00968-ASO_03|ASO_AD_03	LINC00968	1	1	0	0	0	0	0	0	0
151	PPM1F-AS1-ASO_03|ASO_04	LL22NC03-86G7.1-ASO_03|ASO_04	LL22NC03-86G7.1	0	0	0	0	0	0	0	0	0
152	PPM1F-AS1-ASO_03|ASO_06	LL22NC03-86G7.1-ASO_03|ASO_06	LL22NC03-86G7.1	0	0	0	39	1	38	0	0	0
153	PPM1F-AS1-ASO_04|ASO_06	LL22NC03-86G7.1-ASO_04|ASO_06	LL22NC03-86G7.1	0	0	0	65	65	0	0	0	0
154	MAGI2-AS3-ASO_01|ASO_04	MAGI2-AS3-ASO_01|ASO_04	MAGI2-AS3	2	2	0	0	0	0	0	0	0
155	MAPKAPK5-AS1-ASO_06|ASO_AD_01	MAPKAPK5-AS1-ASO_06|ASO_AD_01	MAPKAPK5-AS1	9	5	4	0	0	0	0	0	0
156	MAPKAPK5-AS1-ASO_06|ASO_AD_04	MAPKAPK5-AS1-ASO_06|ASO_AD_04	MAPKAPK5-AS1	12	8	4	0	0	0	0	0	0
157	MAPKAPK5-AS1-ASO_AD_01|ASO_AD_04	MAPKAPK5-AS1-ASO_AD_01|ASO_AD_04	MAPKAPK5-AS1	17	4	13	56	51	5	1	0	1
158	MEG3-ASO_01|ASO_AD_06	MEG3-ASO_01|ASO_AD_06	MEG3	0	0	0	0	0	0	0	0	0
159	MEG3-ASO_01|ASO_AD_09	MEG3-ASO_01|ASO_AD_09	MEG3	24	8	16	0	0	0	0	0	0
160	MEG3-ASO_AD_06|ASO_AD_09	MEG3-ASO_AD_06|ASO_AD_09	MEG3	0	0	0	22	22	0	0	0	0
161	MELTF-AS1-ASO_06|ASO_07	MFI2-AS1-ASO_06|ASO_07	MFI2-AS1	26	22	4	2	2	0	0	0	0
162	NR2F1-AS1-ASO_01|ASO_03	NR2F1-AS1-ASO_01|ASO_03	NR2F1-AS1	0	0	0	0	0	0	0	0	0
163	NR2F1-AS1-ASO_01|ASO_AD_01	NR2F1-AS1-ASO_01|ASO_AD_01	NR2F1-AS1	0	0	0	0	0	0	0	0	0
164	NR2F1-AS1-ASO_01|ASO_AD_08	NR2F1-AS1-ASO_01|ASO_AD_08	NR2F1-AS1	0	0	0	0	0	0	0	0	0
165	NR2F1-AS1-ASO_03|ASO_AD_01	NR2F1-AS1-ASO_03|ASO_AD_01	NR2F1-AS1	1	1	0	0	0	0	0	0	0
166	NR2F1-AS1-ASO_03|ASO_AD_08	NR2F1-AS1-ASO_03|ASO_AD_08	NR2F1-AS1	0	0	0	0	0	0	0	0	0
167	NR2F1-AS1-ASO_AD_01|ASO_AD_08	NR2F1-AS1-ASO_AD_01|ASO_AD_08	NR2F1-AS1	0	0	0	0	0	0	0	0	0
168	PITPNA-AS1-ASO_AD_07|ASO_AD_09	PITPNA-AS1-ASO_AD_07|ASO_AD_09	PITPNA-AS1	1	1	0	0	0	0	0	0	0
169	PTCHD3P1-ASO_05|ASO_06	PTCHD3P1-ASO_05|ASO_06	PTCHD3P1	0	0	0	9	9	0	0	0	0
170	PTCHD3P1-ASO_05|ASO_AD_04	PTCHD3P1-ASO_05|ASO_AD_04	PTCHD3P1	0	0	0	2	2	0	0	0	0
171	PTCHD3P1-ASO_06|ASO_AD_04	PTCHD3P1-ASO_06|ASO_AD_04	PTCHD3P1	0	0	0	0	0	0	0	0	0
172	RAB30-DT-ASO_01|ASO_05	RAB30-AS1-ASO_01|ASO_05	RAB30-AS1	0	0	0	6	0	6	0	0	0
173	RAB30-DT-ASO_01|ASO_AD_04	RAB30-AS1-ASO_01|ASO_AD_04	RAB30-AS1	0	0	0	0	0	0	0	0	0
174	RAB30-DT-ASO_01|ASO_AD_06	RAB30-AS1-ASO_01|ASO_AD_06	RAB30-AS1	0	0	0	0	0	0	0	0	0
175	RAB30-DT-ASO_01|ASO_AD_09	RAB30-AS1-ASO_01|ASO_AD_09	RAB30-AS1	0	0	0	4	4	0	0	0	0
176	RAB30-DT-ASO_05|ASO_AD_04	RAB30-AS1-ASO_05|ASO_AD_04	RAB30-AS1	0	0	0	0	0	0	0	0	0
177	RAB30-DT-ASO_05|ASO_AD_06	RAB30-AS1-ASO_05|ASO_AD_06	RAB30-AS1	1	1	0	0	0	0	1	1	0
178	RAB30-DT-ASO_05|ASO_AD_09	RAB30-AS1-ASO_05|ASO_AD_09	RAB30-AS1	0	0	0	1	0	1	0	0	0
179	RAB30-DT-ASO_AD_04|ASO_AD_06	RAB30-AS1-ASO_AD_04|ASO_AD_06	RAB30-AS1	2	2	0	0	0	0	0	0	0
180	RAB30-DT-ASO_AD_04|ASO_AD_09	RAB30-AS1-ASO_AD_04|ASO_AD_09	RAB30-AS1	3	3	0	0	0	0	0	0	0
181	RAB30-DT-ASO_AD_06|ASO_AD_09	RAB30-AS1-ASO_AD_06|ASO_AD_09	RAB30-AS1	187	185	2	4	4	0	0	0	0
182	RP1-152L7.5-ASO_01|ASO_03	RP1-152L7.5-ASO_01|ASO_03	RP1-152L7.5	0	0	0	3	0	3	0	0	0
183	RP11-10K16.1-ASO_04|ASO_AD_03	RP11-10K16.1-ASO_04|ASO_AD_03	RP11-10K16.1	0	0	0	0	0	0	0	0	0
184	RP11-10K16.1-ASO_04|ASO_AD_04	RP11-10K16.1-ASO_04|ASO_AD_04	RP11-10K16.1	0	0	0	0	0	0	0	0	0
185	RP11-10K16.1-ASO_AD_03|ASO_AD_04	RP11-10K16.1-ASO_AD_03|ASO_AD_04	RP11-10K16.1	0	0	0	0	0	0	0	0	0
186	CCDC84-DT-ASO_02|ASO_03	RP11-110I1.12-ASO_02|ASO_03	RP11-110I1.12	0	0	0	0	0	0	0	0	0
187	CCDC84-DT-ASO_02|ASO_08	RP11-110I1.12-ASO_02|ASO_08	RP11-110I1.12	1	1	0	0	0	0	0	0	0
188	CCDC84-DT-ASO_03|ASO_08	RP11-110I1.12-ASO_03|ASO_08	RP11-110I1.12	0	0	0	0	0	0	0	0	0
189	PPP3CB-AS1-ASO_04|ASO_AD_08	RP11-137L10.6-ASO_04|ASO_AD_08	RP11-137L10.6	1	1	0	0	0	0	0	0	0
190	PIGBOS1-ASO_10|ASO_AD_01	RP11-139H15.1-ASO_10|ASO_AD_01	RP11-139H15.1	22	12	10	0	0	0	0	0	0
191	RP11-149I23.3-ASO_AD_02|ASO_AD_06	RP11-149I23.3-ASO_AD_02|ASO_AD_06	RP11-149I23.3	0	0	0	0	0	0	0	0	0
192	LINC01605-ASO_C013368_01|ASO_C013368_02	RP11-150O12.1-ASO_C013368_01|ASO_C013368_02	RP11-150O12.1	11	5	6	0	0	0	0	0	0
193	LMO7-AS1-ASO_AD_05|ASO_AD_06	RP11-173B14.5-ASO_AD_05|ASO_AD_06	RP11-173B14.5	1	1	0	15	0	15	0	0	0
194	LMO7-AS1-ASO_AD_05|ASO_AD_10	RP11-173B14.5-ASO_AD_05|ASO_AD_10	RP11-173B14.5	1	1	0	2	0	2	0	0	0
195	LMO7-AS1-ASO_AD_06|ASO_AD_10	RP11-173B14.5-ASO_AD_06|ASO_AD_10	RP11-173B14.5	1	1	0	0	0	0	0	0	0
196	RP11-195F19.9-ASO_05|ASO_07	RP11-195F19.9-ASO_05|ASO_07	RP11-195F19.9	53	41	12	4	4	0	0	0	0
197	RP11-220I1.1-ASO_02|ASO_04	RP11-220I1.1-ASO_02|ASO_04	RP11-220I1.1	1	1	0	0	0	0	0	0	0
198	RP11-220I1.1-ASO_02|ASO_05	RP11-220I1.1-ASO_02|ASO_05	RP11-220I1.1	1	1	0	0	0	0	0	0	0
199	RP11-220I1.1-ASO_04|ASO_05	RP11-220I1.1-ASO_04|ASO_05	RP11-220I1.1	1	1	0	0	0	0	0	0	0
200	LINC02454-ASO_AD_03|ASO_AD_06	RP11-221N13.3-ASO_AD_03|ASO_AD_06	RP11-221N13.3	1	1	0	0	0	0	0	0	0
201	LINC02454-ASO_AD_03|ASO_AD_07	RP11-221N13.3-ASO_AD_03|ASO_AD_07	RP11-221N13.3	1	1	0	0	0	0	3	2	1
202	LINC02454-ASO_AD_06|ASO_AD_07	RP11-221N13.3-ASO_AD_06|ASO_AD_07	RP11-221N13.3	6	3	3	13	13	0	0	0	0
203	PRDX6-AS1-ASO_10|ASO_AD_03	RP11-296O14.3-ASO_10|ASO_AD_03	RP11-296O14.3	2	2	0	0	0	0	0	0	0
204	RP11-33B1.1-ASO_AD_04|ASO_AD_07	RP11-33B1.1-ASO_AD_04|ASO_AD_07	RP11-33B1.1	0	0	0	1	0	1	0	0	0
205	RP11-379H18.1-ASO_05|ASO_06	RP11-379H18.1-ASO_05|ASO_06	RP11-379H18.1	1	1	0	0	0	0	0	0	0
206	RP11-38L15.3-ASO_02|ASO_07	RP11-38L15.3-ASO_02|ASO_07	RP11-38L15.3	20	19	1	0	0	0	0	0	0
207	MUC12-AS1-ASO_03|ASO_04	RP11-395B7.4-ASO_03|ASO_04	RP11-395B7.4	105	73	32	7	7	0	0	0	0
208	RP11-398K22.12-ASO_03|ASO_05	RP11-398K22.12-ASO_03|ASO_05	RP11-398K22.12	11	8	3	6	6	0	0	0	0
209	RP11-398K22.12-ASO_03|ASO_AD_01	RP11-398K22.12-ASO_03|ASO_AD_01	RP11-398K22.12	0	0	0	0	0	0	0	0	0
210	RP11-398K22.12-ASO_05|ASO_AD_01	RP11-398K22.12-ASO_05|ASO_AD_01	RP11-398K22.12	1	1	0	3	3	0	0	0	0
211	LINC01615-ASO_01|ASO_AD_04	RP11-417E7.1-ASO_01|ASO_AD_04	RP11-417E7.1	302	229	73	2	2	0	2	2	0
212	LINC01615-ASO_01|ASO_AD_06	RP11-417E7.1-ASO_01|ASO_AD_06	RP11-417E7.1	6	0	6	0	0	0	0	0	0
213	LINC01615-ASO_AD_04|ASO_AD_06	RP11-417E7.1-ASO_AD_04|ASO_AD_06	RP11-417E7.1	11	4	7	0	0	0	1	0	1
214	LINC01137-ASO_01|ASO_05	RP11-422J8.1-ASO_01|ASO_05	RP11-422J8.1	65	31	34	4	0	4	0	0	0
215	LINC01719-ASO_02|ASO_07	RP11-458D21.1-ASO_02|ASO_07	RP11-458D21.1	6	6	0	14	14	0	0	0	0
216	ZNF213-AS1-ASO_01|ASO_02	RP11-473M20.14-ASO_01|ASO_02	RP11-473M20.14	48	33	15	2	2	0	0	0	0
217	ZNF213-AS1-ASO_01|ASO_05	RP11-473M20.14-ASO_01|ASO_05	RP11-473M20.14	2	1	1	1	1	0	0	0	0
218	ZNF213-AS1-ASO_01|ASO_06	RP11-473M20.14-ASO_01|ASO_06	RP11-473M20.14	103	38	65	4	1	3	0	0	0
219	ZNF213-AS1-ASO_02|ASO_05	RP11-473M20.14-ASO_02|ASO_05	RP11-473M20.14	32	26	6	128	128	0	0	0	0
220	ZNF213-AS1-ASO_02|ASO_06	RP11-473M20.14-ASO_02|ASO_06	RP11-473M20.14	692	502	190	36	36	0	6	5	1
221	ZNF213-AS1-ASO_05|ASO_06	RP11-473M20.14-ASO_05|ASO_06	RP11-473M20.14	31	23	8	28	28	0	2	2	0
222	RP11-474P2.4-ASO_01|ASO_08	RP11-474P2.4-ASO_01|ASO_08	RP11-474P2.4	0	0	0	4	0	4	0	0	0
223	RP11-527D7.1-ASO_02|ASO_AD_04	RP11-527D7.1-ASO_02|ASO_AD_04	RP11-527D7.1	0	0	0	0	0	0	0	0	0
224	RP11-527D7.1-ASO_02|ASO_AD_06	RP11-527D7.1-ASO_02|ASO_AD_06	RP11-527D7.1	0	0	0	0	0	0	0	0	0
225	RP11-527D7.1-ASO_AD_04|ASO_AD_06	RP11-527D7.1-ASO_AD_04|ASO_AD_06	RP11-527D7.1	1	1	0	0	0	0	0	0	0
226	LINC02482-ASO_AD_01|ASO_AD_05	RP11-539L10.3-ASO_AD_01|ASO_AD_05	RP11-539L10.3	0	0	0	0	0	0	0	0	0
227	LNCOG-ASO_09|ASO_AD_05	RP11-54A9.1-ASO_09|ASO_AD_05	RP11-54A9.1	1	1	0	0	0	0	0	0	0
228	LNCOG-ASO_09|ASO_AD_10	RP11-54A9.1-ASO_09|ASO_AD_10	RP11-54A9.1	1	1	0	0	0	0	0	0	0
229	LNCOG-ASO_AD_05|ASO_AD_10	RP11-54A9.1-ASO_AD_05|ASO_AD_10	RP11-54A9.1	1	1	0	0	0	0	0	0	0
230	RP11-553K8.5-ASO_AD_04|ASO_AD_06	RP11-553K8.5-ASO_AD_04|ASO_AD_06	RP11-553K8.5	0	0	0	0	0	0	0	0	0
231	PRANCR-ASO_01|ASO_AD_03	RP11-611E13.2-ASO_01|ASO_AD_03	RP11-611E13.2	0	0	0	18	0	18	0	0	0
232	NBDY-ASO_03|ASO_04	RP11-622K12.1-ASO_03|ASO_04	RP11-622K12.1	1	1	0	7	0	7	0	0	0
233	LINC01503-ASO_02|ASO_04	RP11-65J3.1-ASO_02|ASO_04	RP11-65J3.1	0	0	0	9	0	9	0	0	0
234	LINC01503-ASO_02|ASO_05	RP11-65J3.1-ASO_02|ASO_05	RP11-65J3.1	0	0	0	0	0	0	0	0	0
235	LINC01503-ASO_04|ASO_05	RP11-65J3.1-ASO_04|ASO_05	RP11-65J3.1	42	34	8	1	1	0	0	0	0
236	RP11-660L16.2-ASO_02|ASO_06	RP11-660L16.2-ASO_02|ASO_06	RP11-660L16.2	10	9	1	0	0	0	0	0	0
237	LINC02381-ASO_01|ASO_AD_04	RP11-834C11.4-ASO_01|ASO_AD_04	RP11-834C11.4	0	0	0	0	0	0	0	0	0
238	LINC02381-ASO_01|ASO_AD_05	RP11-834C11.4-ASO_01|ASO_AD_05	RP11-834C11.4	0	0	0	0	0	0	0	0	0
239	LINC02381-ASO_AD_04|ASO_AD_05	RP11-834C11.4-ASO_AD_04|ASO_AD_05	RP11-834C11.4	1	1	0	0	0	0	0	0	0
240	LASTR-ASO_05|ASO_07	RP13-463N16.6-ASO_05|ASO_07	RP13-463N16.6	3	3	0	0	0	0	0	0	0
241	LNCTAM34A-ASO_01|ASO_02	RP3-510D11.2-ASO_01|ASO_02	RP3-510D11.2	0	0	0	0	0	0	0	0	0
242	LNCTAM34A-ASO_01|ASO_07	RP3-510D11.2-ASO_01|ASO_07	RP3-510D11.2	0	0	0	0	0	0	0	0	0
243	LNCTAM34A-ASO_02|ASO_07	RP3-510D11.2-ASO_02|ASO_07	RP3-510D11.2	1	1	0	0	0	0	0	0	0
244	NRSN2-AS1-ASO_05|ASO_AD_05	RP5-1103G7.4-ASO_05|ASO_AD_05	RP5-1103G7.4	0	0	0	0	0	0	0	0	0
245	ELOA-AS1-ASO_AD_02|ASO_AD_06	RP5-886K2.3-ASO_AD_02|ASO_AD_06	RP5-886K2.3	0	0	0	0	0	0	0	0	0
246	PRR34-AS1-ASO_01|ASO_07	RP6-109B7.3-ASO_01|ASO_07	RP6-109B7.3	0	0	0	0	0	0	0	0	0
247	MIR222HG-ASO_05|ASO_AD_07	RP6-99M1.2-ASO_05|ASO_AD_07	RP6-99M1.2	0	0	0	0	0	0	0	0	0
248	SNHG18-ASO_04|ASO_AD_10	SNHG18-ASO_04|ASO_AD_10	SNHG18	0	0	0	0	0	0	0	0	0
249	SOCS2-AS1-ASO_10|ASO_AD_01	SOCS2-AS1-ASO_10|ASO_AD_01	SOCS2-AS1	1	1	0	0	0	0	0	0	0
250	SOCS2-AS1-ASO_10|ASO_AD_04	SOCS2-AS1-ASO_10|ASO_AD_04	SOCS2-AS1	1	1	0	0	0	0	0	0	0
251	SOCS2-AS1-ASO_AD_01|ASO_AD_04	SOCS2-AS1-ASO_AD_01|ASO_AD_04	SOCS2-AS1	1	1	0	11	11	0	0	0	0
252	SRP14-AS1-ASO_04|ASO_10	SRP14-AS1-ASO_04|ASO_10	SRP14-AS1	45	14	31	5	4	1	0	0	0
253	SUGT1P1-ASO_03|ASO_08	SUGT1P-ASO_03|ASO_08	SUGT1P	1	1	0	1	0	1	1	0	1
254	TERC-ASO_05|ASO_AD_10	TERC-ASO_05|ASO_AD_10	TERC	0	0	0	0	0	0	0	0	0
255	TMCC1-AS1-ASO_09|ASO_AD_10	TMCC1-AS1-ASO_09|ASO_AD_10	TMCC1-AS1	1	1	0	0	0	0	0	0	0
256	TP53TG1-ASO_AD_04|ASO_AD_08	TP53TG1-ASO_AD_04|ASO_AD_08	TP53TG1	1	1	0	0	0	0	0	0	0
257	TP53TG1-ASO_AD_04|ASO_AD_10	TP53TG1-ASO_AD_04|ASO_AD_10	TP53TG1	1	1	0	0	0	0	0	0	0
258	TP53TG1-ASO_AD_08|ASO_AD_10	TP53TG1-ASO_AD_08|ASO_AD_10	TP53TG1	1	1	0	15	15	0	0	0	0
259	TRAM2-AS1-ASO_05|ASO_AD_05	TRAM2-AS1-ASO_05|ASO_AD_05	TRAM2-AS1	1	1	0	0	0	0	0	0	0
260	TTN-AS1-ASO_01|ASO_09	TTN-AS1-ASO_01|ASO_09	TTN-AS1	1	1	0	0	0	0	0	0	0
261	TUG1-ASO_01|ASO_02	TUG1-ASO_01|ASO_02	TUG1	4	4	0	46	0	46	2	2	0
262	TUG1-ASO_01|ASO_06	TUG1-ASO_01|ASO_06	TUG1	0	0	0	4	0	4	0	0	0
263	TUG1-ASO_01|ASO_AD_07	TUG1-ASO_01|ASO_AD_07	TUG1	0	0	0	19	1	18	0	0	0
264	TUG1-ASO_01|ASO_AD_08	TUG1-ASO_01|ASO_AD_08	TUG1	0	0	0	4	0	4	0	0	0
265	TUG1-ASO_02|ASO_06	TUG1-ASO_02|ASO_06	TUG1	0	0	0	0	0	0	1	1	0
266	TUG1-ASO_02|ASO_AD_07	TUG1-ASO_02|ASO_AD_07	TUG1	0	0	0	19	0	19	0	0	0
267	TUG1-ASO_02|ASO_AD_08	TUG1-ASO_02|ASO_AD_08	TUG1	0	0	0	4	0	4	0	0	0
268	TUG1-ASO_06|ASO_AD_07	TUG1-ASO_06|ASO_AD_07	TUG1	0	0	0	12	12	0	0	0	0
269	TUG1-ASO_06|ASO_AD_08	TUG1-ASO_06|ASO_AD_08	TUG1	0	0	0	0	0	0	0	0	0
270	TUG1-ASO_AD_07|ASO_AD_08	TUG1-ASO_AD_07|ASO_AD_08	TUG1	1	1	0	0	0	0	0	0	0
271	U52111.14-ASO_05|ASO_AD_10	U52111.14-ASO_05|ASO_AD_10	U52111.14	0	0	0	0	0	0	0	0	0
272	UBL7-AS1-ASO_AD_05|ASO_AD_06	UBL7-AS1-ASO_AD_05|ASO_AD_06	UBL7-AS1	1	1	0	3	0	3	0	0	0
273	WDFY3-AS2-ASO_03|ASO_08	WDFY3-AS2-ASO_03|ASO_08	WDFY3-AS2	0	0	0	0	0	0	0	0	0
274	WDFY3-AS2-ASO_03|ASO_AD_03	WDFY3-AS2-ASO_03|ASO_AD_03	WDFY3-AS2	0	0	0	0	0	0	0	0	0
275	WDFY3-AS2-ASO_08|ASO_AD_03	WDFY3-AS2-ASO_08|ASO_AD_03	WDFY3-AS2	0	0	0	0	0	0	0	0	0
276	ZNF674-AS1-ASO_01|ASO_AD_06	ZNF674-AS1-ASO_01|ASO_AD_06	ZNF674-AS1	0	0	0	0	0	0	0	0	0
277	ZSCAN16-AS1-ASO_01|ASO_AD_10	ZSCAN16-AS1-ASO_01|ASO_AD_10	ZSCAN16-AS1	0	0	0	0	0	0	0	0	0

## Sheet: Table S5C
	pair_type	pub.pair_id	pair_id	ASO_id	siRNA_id	DEGs_ASO	DEGs_siRNA	DEGs_comn
1	same target	A1BG-AS1-ASO_01|A1BG-AS1-siRNA_03	A1BG-AS1-ASO_01|A1BG-AS1-siRNA_03	ASO_G0268895_01	siRNA_G0268895_03	1246	90	9
2	same target	A1BG-AS1-ASO_01|A1BG-AS1-siRNA_04	A1BG-AS1-ASO_01|A1BG-AS1-siRNA_04	ASO_G0268895_01	siRNA_G0268895_04	1246	507	158
3	same target	A1BG-AS1-ASO_03|A1BG-AS1-siRNA_03	A1BG-AS1-ASO_03|A1BG-AS1-siRNA_03	ASO_G0268895_03	siRNA_G0268895_03	858	90	3
4	same target	A1BG-AS1-ASO_03|A1BG-AS1-siRNA_04	A1BG-AS1-ASO_03|A1BG-AS1-siRNA_04	ASO_G0268895_03	siRNA_G0268895_04	858	507	8
5	different target	A1BG-AS1-ASO_01|AC016747.3-siRNA_02	A1BG-AS1-ASO_01|AC016747.3-siRNA_02	ASO_G0268895_01	siRNA_G0212978_02	1246	1070	219
6	different target	A1BG-AS1-ASO_01|AC016747.3-siRNA_03	A1BG-AS1-ASO_01|AC016747.3-siRNA_03	ASO_G0268895_01	siRNA_G0212978_03	1246	343	83
7	different target	A1BG-AS1-ASO_03|AC016747.3-siRNA_02	A1BG-AS1-ASO_03|AC016747.3-siRNA_02	ASO_G0268895_03	siRNA_G0212978_02	858	1070	23
8	different target	A1BG-AS1-ASO_03|AC016747.3-siRNA_03	A1BG-AS1-ASO_03|AC016747.3-siRNA_03	ASO_G0268895_03	siRNA_G0212978_03	858	343	6
9	different target	A1BG-AS1-ASO_01|LINC00667-siRNA_02	A1BG-AS1-ASO_01|LINC00667-siRNA_02	ASO_G0268895_01	siRNA_G0263753_02	1246	94	10
10	different target	A1BG-AS1-ASO_01|LINC00667-siRNA_03	A1BG-AS1-ASO_01|LINC00667-siRNA_03	ASO_G0268895_01	siRNA_G0263753_03	1246	171	34
11	different target	A1BG-AS1-ASO_03|LINC00667-siRNA_02	A1BG-AS1-ASO_03|LINC00667-siRNA_02	ASO_G0268895_03	siRNA_G0263753_02	858	94	12
12	different target	A1BG-AS1-ASO_03|LINC00667-siRNA_03	A1BG-AS1-ASO_03|LINC00667-siRNA_03	ASO_G0268895_03	siRNA_G0263753_03	858	171	13
13	different target	A1BG-AS1-ASO_01|LINC00886-siRNA_01	A1BG-AS1-ASO_01|LINC00886-siRNA_01	ASO_G0268895_01	siRNA_G0240875_01	1246	37	6
14	different target	A1BG-AS1-ASO_01|LINC00886-siRNA_04	A1BG-AS1-ASO_01|LINC00886-siRNA_04	ASO_G0268895_01	siRNA_G0240875_04	1246	16	3
15	different target	A1BG-AS1-ASO_03|LINC00886-siRNA_01	A1BG-AS1-ASO_03|LINC00886-siRNA_01	ASO_G0268895_03	siRNA_G0240875_01	858	37	4
16	different target	A1BG-AS1-ASO_03|LINC00886-siRNA_04	A1BG-AS1-ASO_03|LINC00886-siRNA_04	ASO_G0268895_03	siRNA_G0240875_04	858	16	1
17	different target	A1BG-AS1-ASO_01|LINC00938-siRNA_01	A1BG-AS1-ASO_01|LINC00938-siRNA_01	ASO_G0268895_01	siRNA_G0273015_01	1246	25	1
18	different target	A1BG-AS1-ASO_01|LINC00938-siRNA_04	A1BG-AS1-ASO_01|LINC00938-siRNA_04	ASO_G0268895_01	siRNA_G0273015_04	1246	605	164
19	different target	A1BG-AS1-ASO_03|LINC00938-siRNA_01	A1BG-AS1-ASO_03|LINC00938-siRNA_01	ASO_G0268895_03	siRNA_G0273015_01	858	25	0
20	different target	A1BG-AS1-ASO_03|LINC00938-siRNA_04	A1BG-AS1-ASO_03|LINC00938-siRNA_04	ASO_G0268895_03	siRNA_G0273015_04	858	605	10
21	different target	A1BG-AS1-ASO_01|LINC02454-siRNA_01	A1BG-AS1-ASO_01|RP11-221N13.3-siRNA_01	ASO_G0268895_01	siRNA_G0256268_01	1246	1014	208
22	different target	A1BG-AS1-ASO_01|LINC02454-siRNA_03	A1BG-AS1-ASO_01|RP11-221N13.3-siRNA_03	ASO_G0268895_01	siRNA_G0256268_03	1246	391	115
23	different target	A1BG-AS1-ASO_03|LINC02454-siRNA_01	A1BG-AS1-ASO_03|RP11-221N13.3-siRNA_01	ASO_G0268895_03	siRNA_G0256268_01	858	1014	32
24	different target	A1BG-AS1-ASO_03|LINC02454-siRNA_03	A1BG-AS1-ASO_03|RP11-221N13.3-siRNA_03	ASO_G0268895_03	siRNA_G0256268_03	858	391	4
25	different target	A1BG-AS1-ASO_01|MAPKAPK5-AS1-siRNA_01	A1BG-AS1-ASO_01|MAPKAPK5-AS1-siRNA_01	ASO_G0268895_01	siRNA_G0234608_01	1246	228	105
26	different target	A1BG-AS1-ASO_01|MAPKAPK5-AS1-siRNA_03	A1BG-AS1-ASO_01|MAPKAPK5-AS1-siRNA_03	ASO_G0268895_01	siRNA_G0234608_03	1246	94	11
27	different target	A1BG-AS1-ASO_03|MAPKAPK5-AS1-siRNA_01	A1BG-AS1-ASO_03|MAPKAPK5-AS1-siRNA_01	ASO_G0268895_03	siRNA_G0234608_01	858	228	1
28	different target	A1BG-AS1-ASO_03|MAPKAPK5-AS1-siRNA_03	A1BG-AS1-ASO_03|MAPKAPK5-AS1-siRNA_03	ASO_G0268895_03	siRNA_G0234608_03	858	94	0
29	different target	A1BG-AS1-ASO_01|RNASEH1-AS1-siRNA_02	A1BG-AS1-ASO_01|AC108488.3-siRNA_02	ASO_G0268895_01	siRNA_G0234171_02	1246	8	0
30	different target	A1BG-AS1-ASO_01|RNASEH1-AS1-siRNA_04	A1BG-AS1-ASO_01|AC108488.3-siRNA_04	ASO_G0268895_01	siRNA_G0234171_04	1246	71	3
31	different target	A1BG-AS1-ASO_03|RNASEH1-AS1-siRNA_02	A1BG-AS1-ASO_03|AC108488.3-siRNA_02	ASO_G0268895_03	siRNA_G0234171_02	858	8	0
32	different target	A1BG-AS1-ASO_03|RNASEH1-AS1-siRNA_04	A1BG-AS1-ASO_03|AC108488.3-siRNA_04	ASO_G0268895_03	siRNA_G0234171_04	858	71	3
33	different target	A1BG-AS1-ASO_01|ZNF213-AS1-siRNA_03	A1BG-AS1-ASO_01|RP11-473M20.14-siRNA_03	ASO_G0268895_01	siRNA_G0263072_03	1246	28	2
34	different target	A1BG-AS1-ASO_01|ZNF213-AS1-siRNA_04	A1BG-AS1-ASO_01|RP11-473M20.14-siRNA_04	ASO_G0268895_01	siRNA_G0263072_04	1246	125	17
35	different target	A1BG-AS1-ASO_03|ZNF213-AS1-siRNA_03	A1BG-AS1-ASO_03|RP11-473M20.14-siRNA_03	ASO_G0268895_03	siRNA_G0263072_03	858	28	2
36	different target	A1BG-AS1-ASO_03|ZNF213-AS1-siRNA_04	A1BG-AS1-ASO_03|RP11-473M20.14-siRNA_04	ASO_G0268895_03	siRNA_G0263072_04	858	125	10
37	same target	AC016747.3-ASO_02|AC016747.3-siRNA_02	AC016747.3-ASO_02|AC016747.3-siRNA_02	ASO_G0212978_02	siRNA_G0212978_02	33	1070	3
38	same target	AC016747.3-ASO_02|AC016747.3-siRNA_03	AC016747.3-ASO_02|AC016747.3-siRNA_03	ASO_G0212978_02	siRNA_G0212978_03	33	343	1
39	same target	AC016747.3-ASO_04|AC016747.3-siRNA_02	AC016747.3-ASO_04|AC016747.3-siRNA_02	ASO_G0212978_04	siRNA_G0212978_02	1	1070	0
40	same target	AC016747.3-ASO_04|AC016747.3-siRNA_03	AC016747.3-ASO_04|AC016747.3-siRNA_03	ASO_G0212978_04	siRNA_G0212978_03	1	343	0
41	different target	AC016747.3-ASO_02|A1BG-AS1-siRNA_03	AC016747.3-ASO_02|A1BG-AS1-siRNA_03	ASO_G0212978_02	siRNA_G0268895_03	33	90	1
42	different target	AC016747.3-ASO_02|A1BG-AS1-siRNA_04	AC016747.3-ASO_02|A1BG-AS1-siRNA_04	ASO_G0212978_02	siRNA_G0268895_04	33	507	4
43	different target	AC016747.3-ASO_04|A1BG-AS1-siRNA_03	AC016747.3-ASO_04|A1BG-AS1-siRNA_03	ASO_G0212978_04	siRNA_G0268895_03	1	90	1
44	different target	AC016747.3-ASO_04|A1BG-AS1-siRNA_04	AC016747.3-ASO_04|A1BG-AS1-siRNA_04	ASO_G0212978_04	siRNA_G0268895_04	1	507	1
45	different target	AC016747.3-ASO_02|LINC00667-siRNA_02	AC016747.3-ASO_02|LINC00667-siRNA_02	ASO_G0212978_02	siRNA_G0263753_02	33	94	1
46	different target	AC016747.3-ASO_02|LINC00667-siRNA_03	AC016747.3-ASO_02|LINC00667-siRNA_03	ASO_G0212978_02	siRNA_G0263753_03	33	171	2
47	different target	AC016747.3-ASO_04|LINC00667-siRNA_02	AC016747.3-ASO_04|LINC00667-siRNA_02	ASO_G0212978_04	siRNA_G0263753_02	1	94	1
48	different target	AC016747.3-ASO_04|LINC00667-siRNA_03	AC016747.3-ASO_04|LINC00667-siRNA_03	ASO_G0212978_04	siRNA_G0263753_03	1	171	1
49	different target	AC016747.3-ASO_02|LINC00886-siRNA_01	AC016747.3-ASO_02|LINC00886-siRNA_01	ASO_G0212978_02	siRNA_G0240875_01	33	37	0
50	different target	AC016747.3-ASO_02|LINC00886-siRNA_04	AC016747.3-ASO_02|LINC00886-siRNA_04	ASO_G0212978_02	siRNA_G0240875_04	33	16	0
51	different target	AC016747.3-ASO_04|LINC00886-siRNA_01	AC016747.3-ASO_04|LINC00886-siRNA_01	ASO_G0212978_04	siRNA_G0240875_01	1	37	0
52	different target	AC016747.3-ASO_04|LINC00886-siRNA_04	AC016747.3-ASO_04|LINC00886-siRNA_04	ASO_G0212978_04	siRNA_G0240875_04	1	16	0
53	different target	AC016747.3-ASO_02|LINC00938-siRNA_01	AC016747.3-ASO_02|LINC00938-siRNA_01	ASO_G0212978_02	siRNA_G0273015_01	33	25	0
54	different target	AC016747.3-ASO_02|LINC00938-siRNA_04	AC016747.3-ASO_02|LINC00938-siRNA_04	ASO_G0212978_02	siRNA_G0273015_04	33	605	0
55	different target	AC016747.3-ASO_04|LINC00938-siRNA_01	AC016747.3-ASO_04|LINC00938-siRNA_01	ASO_G0212978_04	siRNA_G0273015_01	1	25	0
56	different target	AC016747.3-ASO_04|LINC00938-siRNA_04	AC016747.3-ASO_04|LINC00938-siRNA_04	ASO_G0212978_04	siRNA_G0273015_04	1	605	0
57	different target	AC016747.3-ASO_02|LINC02454-siRNA_01	AC016747.3-ASO_02|RP11-221N13.3-siRNA_01	ASO_G0212978_02	siRNA_G0256268_01	33	1014	3
58	different target	AC016747.3-ASO_02|LINC02454-siRNA_03	AC016747.3-ASO_02|RP11-221N13.3-siRNA_03	ASO_G0212978_02	siRNA_G0256268_03	33	391	2
59	different target	AC016747.3-ASO_04|LINC02454-siRNA_01	AC016747.3-ASO_04|RP11-221N13.3-siRNA_01	ASO_G0212978_04	siRNA_G0256268_01	1	1014	0
60	different target	AC016747.3-ASO_04|LINC02454-siRNA_03	AC016747.3-ASO_04|RP11-221N13.3-siRNA_03	ASO_G0212978_04	siRNA_G0256268_03	1	391	0
61	different target	AC016747.3-ASO_02|MAPKAPK5-AS1-siRNA_01	AC016747.3-ASO_02|MAPKAPK5-AS1-siRNA_01	ASO_G0212978_02	siRNA_G0234608_01	33	228	0
62	different target	AC016747.3-ASO_02|MAPKAPK5-AS1-siRNA_03	AC016747.3-ASO_02|MAPKAPK5-AS1-siRNA_03	ASO_G0212978_02	siRNA_G0234608_03	33	94	1
63	different target	AC016747.3-ASO_04|MAPKAPK5-AS1-siRNA_01	AC016747.3-ASO_04|MAPKAPK5-AS1-siRNA_01	ASO_G0212978_04	siRNA_G0234608_01	1	228	0
64	different target	AC016747.3-ASO_04|MAPKAPK5-AS1-siRNA_03	AC016747.3-ASO_04|MAPKAPK5-AS1-siRNA_03	ASO_G0212978_04	siRNA_G0234608_03	1	94	0
65	different target	AC016747.3-ASO_02|RNASEH1-AS1-siRNA_02	AC016747.3-ASO_02|AC108488.3-siRNA_02	ASO_G0212978_02	siRNA_G0234171_02	33	8	0
66	different target	AC016747.3-ASO_02|RNASEH1-AS1-siRNA_04	AC016747.3-ASO_02|AC108488.3-siRNA_04	ASO_G0212978_02	siRNA_G0234171_04	33	71	0
67	different target	AC016747.3-ASO_04|RNASEH1-AS1-siRNA_02	AC016747.3-ASO_04|AC108488.3-siRNA_02	ASO_G0212978_04	siRNA_G0234171_02	1	8	0
68	different target	AC016747.3-ASO_04|RNASEH1-AS1-siRNA_04	AC016747.3-ASO_04|AC108488.3-siRNA_04	ASO_G0212978_04	siRNA_G0234171_04	1	71	0
69	different target	AC016747.3-ASO_02|ZNF213-AS1-siRNA_03	AC016747.3-ASO_02|RP11-473M20.14-siRNA_03	ASO_G0212978_02	siRNA_G0263072_03	33	28	0
70	different target	AC016747.3-ASO_02|ZNF213-AS1-siRNA_04	AC016747.3-ASO_02|RP11-473M20.14-siRNA_04	ASO_G0212978_02	siRNA_G0263072_04	33	125	0
71	different target	AC016747.3-ASO_04|ZNF213-AS1-siRNA_03	AC016747.3-ASO_04|RP11-473M20.14-siRNA_03	ASO_G0212978_04	siRNA_G0263072_03	1	28	0
72	different target	AC016747.3-ASO_04|ZNF213-AS1-siRNA_04	AC016747.3-ASO_04|RP11-473M20.14-siRNA_04	ASO_G0212978_04	siRNA_G0263072_04	1	125	0
73	same target	LINC00667-ASO_AD01|LINC00667-siRNA_02	LINC00667-ASO_AD01|LINC00667-siRNA_02	ASO_G0263753_AD_01	siRNA_G0263753_02	238	94	5
74	same target	LINC00667-ASO_AD01|LINC00667-siRNA_03	LINC00667-ASO_AD01|LINC00667-siRNA_03	ASO_G0263753_AD_01	siRNA_G0263753_03	238	171	20
75	same target	LINC00667-ASO_AD06|LINC00667-siRNA_02	LINC00667-ASO_AD06|LINC00667-siRNA_02	ASO_G0263753_AD_06	siRNA_G0263753_02	359	94	5
76	same target	LINC00667-ASO_AD06|LINC00667-siRNA_03	LINC00667-ASO_AD06|LINC00667-siRNA_03	ASO_G0263753_AD_06	siRNA_G0263753_03	359	171	27
77	different target	LINC00667-ASO_AD01|A1BG-AS1-siRNA_03	LINC00667-ASO_AD01|A1BG-AS1-siRNA_03	ASO_G0263753_AD_01	siRNA_G0268895_03	238	90	4
78	different target	LINC00667-ASO_AD01|A1BG-AS1-siRNA_04	LINC00667-ASO_AD01|A1BG-AS1-siRNA_04	ASO_G0263753_AD_01	siRNA_G0268895_04	238	507	112
79	different target	LINC00667-ASO_AD06|A1BG-AS1-siRNA_03	LINC00667-ASO_AD06|A1BG-AS1-siRNA_03	ASO_G0263753_AD_06	siRNA_G0268895_03	359	90	6
80	different target	LINC00667-ASO_AD06|A1BG-AS1-siRNA_04	LINC00667-ASO_AD06|A1BG-AS1-siRNA_04	ASO_G0263753_AD_06	siRNA_G0268895_04	359	507	131
81	different target	LINC00667-ASO_AD01|AC016747.3-siRNA_02	LINC00667-ASO_AD01|AC016747.3-siRNA_02	ASO_G0263753_AD_01	siRNA_G0212978_02	238	1070	127
82	different target	LINC00667-ASO_AD01|AC016747.3-siRNA_03	LINC00667-ASO_AD01|AC016747.3-siRNA_03	ASO_G0263753_AD_01	siRNA_G0212978_03	238	343	59
83	different target	LINC00667-ASO_AD06|AC016747.3-siRNA_02	LINC00667-ASO_AD06|AC016747.3-siRNA_02	ASO_G0263753_AD_06	siRNA_G0212978_02	359	1070	148
84	different target	LINC00667-ASO_AD06|AC016747.3-siRNA_03	LINC00667-ASO_AD06|AC016747.3-siRNA_03	ASO_G0263753_AD_06	siRNA_G0212978_03	359	343	62
85	different target	LINC00667-ASO_AD01|LINC00886-siRNA_01	LINC00667-ASO_AD01|LINC00886-siRNA_01	ASO_G0263753_AD_01	siRNA_G0240875_01	238	37	4
86	different target	LINC00667-ASO_AD01|LINC00886-siRNA_04	LINC00667-ASO_AD01|LINC00886-siRNA_04	ASO_G0263753_AD_01	siRNA_G0240875_04	238	16	0
87	different target	LINC00667-ASO_AD06|LINC00886-siRNA_01	LINC00667-ASO_AD06|LINC00886-siRNA_01	ASO_G0263753_AD_06	siRNA_G0240875_01	359	37	1
88	different target	LINC00667-ASO_AD06|LINC00886-siRNA_04	LINC00667-ASO_AD06|LINC00886-siRNA_04	ASO_G0263753_AD_06	siRNA_G0240875_04	359	16	0
89	different target	LINC00667-ASO_AD01|LINC00938-siRNA_01	LINC00667-ASO_AD01|LINC00938-siRNA_01	ASO_G0263753_AD_01	siRNA_G0273015_01	238	25	0
90	different target	LINC00667-ASO_AD01|LINC00938-siRNA_04	LINC00667-ASO_AD01|LINC00938-siRNA_04	ASO_G0263753_AD_01	siRNA_G0273015_04	238	605	114
91	different target	LINC00667-ASO_AD06|LINC00938-siRNA_01	LINC00667-ASO_AD06|LINC00938-siRNA_01	ASO_G0263753_AD_06	siRNA_G0273015_01	359	25	3
92	different target	LINC00667-ASO_AD06|LINC00938-siRNA_04	LINC00667-ASO_AD06|LINC00938-siRNA_04	ASO_G0263753_AD_06	siRNA_G0273015_04	359	605	144
93	different target	LINC00667-ASO_AD01|LINC02454-siRNA_01	LINC00667-ASO_AD01|RP11-221N13.3-siRNA_01	ASO_G0263753_AD_01	siRNA_G0256268_01	238	1014	123
94	different target	LINC00667-ASO_AD01|LINC02454-siRNA_03	LINC00667-ASO_AD01|RP11-221N13.3-siRNA_03	ASO_G0263753_AD_01	siRNA_G0256268_03	238	391	100
95	different target	LINC00667-ASO_AD06|LINC02454-siRNA_01	LINC00667-ASO_AD06|RP11-221N13.3-siRNA_01	ASO_G0263753_AD_06	siRNA_G0256268_01	359	1014	159
96	different target	LINC00667-ASO_AD06|LINC02454-siRNA_03	LINC00667-ASO_AD06|RP11-221N13.3-siRNA_03	ASO_G0263753_AD_06	siRNA_G0256268_03	359	391	95
97	different target	LINC00667-ASO_AD01|MAPKAPK5-AS1-siRNA_01	LINC00667-ASO_AD01|MAPKAPK5-AS1-siRNA_01	ASO_G0263753_AD_01	siRNA_G0234608_01	238	228	67
98	different target	LINC00667-ASO_AD01|MAPKAPK5-AS1-siRNA_03	LINC00667-ASO_AD01|MAPKAPK5-AS1-siRNA_03	ASO_G0263753_AD_01	siRNA_G0234608_03	238	94	12
99	different target	LINC00667-ASO_AD06|MAPKAPK5-AS1-siRNA_01	LINC00667-ASO_AD06|MAPKAPK5-AS1-siRNA_01	ASO_G0263753_AD_06	siRNA_G0234608_01	359	228	94
100	different target	LINC00667-ASO_AD06|MAPKAPK5-AS1-siRNA_03	LINC00667-ASO_AD06|MAPKAPK5-AS1-siRNA_03	ASO_G0263753_AD_06	siRNA_G0234608_03	359	94	10
101	different target	LINC00667-ASO_AD01|RNASEH1-AS1-siRNA_02	LINC00667-ASO_AD01|AC108488.3-siRNA_02	ASO_G0263753_AD_01	siRNA_G0234171_02	238	8	0
102	different target	LINC00667-ASO_AD01|RNASEH1-AS1-siRNA_04	LINC00667-ASO_AD01|AC108488.3-siRNA_04	ASO_G0263753_AD_01	siRNA_G0234171_04	238	71	1
103	different target	LINC00667-ASO_AD06|RNASEH1-AS1-siRNA_02	LINC00667-ASO_AD06|AC108488.3-siRNA_02	ASO_G0263753_AD_06	siRNA_G0234171_02	359	8	0
104	different target	LINC00667-ASO_AD06|RNASEH1-AS1-siRNA_04	LINC00667-ASO_AD06|AC108488.3-siRNA_04	ASO_G0263753_AD_06	siRNA_G0234171_04	359	71	1
105	different target	LINC00667-ASO_AD01|ZNF213-AS1-siRNA_03	LINC00667-ASO_AD01|RP11-473M20.14-siRNA_03	ASO_G0263753_AD_01	siRNA_G0263072_03	238	28	1
106	different target	LINC00667-ASO_AD01|ZNF213-AS1-siRNA_04	LINC00667-ASO_AD01|RP11-473M20.14-siRNA_04	ASO_G0263753_AD_01	siRNA_G0263072_04	238	125	6
107	different target	LINC00667-ASO_AD06|ZNF213-AS1-siRNA_03	LINC00667-ASO_AD06|RP11-473M20.14-siRNA_03	ASO_G0263753_AD_06	siRNA_G0263072_03	359	28	2
108	different target	LINC00667-ASO_AD06|ZNF213-AS1-siRNA_04	LINC00667-ASO_AD06|RP11-473M20.14-siRNA_04	ASO_G0263753_AD_06	siRNA_G0263072_04	359	125	5
109	same target	LINC00886-ASO_01|LINC00886-siRNA_01	LINC00886-ASO_01|LINC00886-siRNA_01	ASO_G0240875_01	siRNA_G0240875_01	16	37	1
110	same target	LINC00886-ASO_01|LINC00886-siRNA_04	LINC00886-ASO_01|LINC00886-siRNA_04	ASO_G0240875_01	siRNA_G0240875_04	16	16	1
111	same target	LINC00886-ASO_10|LINC00886-siRNA_01	LINC00886-ASO_10|LINC00886-siRNA_01	ASO_G0240875_10	siRNA_G0240875_01	44	37	2
112	same target	LINC00886-ASO_10|LINC00886-siRNA_04	LINC00886-ASO_10|LINC00886-siRNA_04	ASO_G0240875_10	siRNA_G0240875_04	44	16	1
113	different target	LINC00886-ASO_01|A1BG-AS1-siRNA_03	LINC00886-ASO_01|A1BG-AS1-siRNA_03	ASO_G0240875_01	siRNA_G0268895_03	16	90	2
114	different target	LINC00886-ASO_01|A1BG-AS1-siRNA_04	LINC00886-ASO_01|A1BG-AS1-siRNA_04	ASO_G0240875_01	siRNA_G0268895_04	16	507	3
115	different target	LINC00886-ASO_10|A1BG-AS1-siRNA_03	LINC00886-ASO_10|A1BG-AS1-siRNA_03	ASO_G0240875_10	siRNA_G0268895_03	44	90	3
116	different target	LINC00886-ASO_10|A1BG-AS1-siRNA_04	LINC00886-ASO_10|A1BG-AS1-siRNA_04	ASO_G0240875_10	siRNA_G0268895_04	44	507	11
117	different target	LINC00886-ASO_01|AC016747.3-siRNA_02	LINC00886-ASO_01|AC016747.3-siRNA_02	ASO_G0240875_01	siRNA_G0212978_02	16	1070	2
118	different target	LINC00886-ASO_01|AC016747.3-siRNA_03	LINC00886-ASO_01|AC016747.3-siRNA_03	ASO_G0240875_01	siRNA_G0212978_03	16	343	0
119	different target	LINC00886-ASO_10|AC016747.3-siRNA_02	LINC00886-ASO_10|AC016747.3-siRNA_02	ASO_G0240875_10	siRNA_G0212978_02	44	1070	17
120	different target	LINC00886-ASO_10|AC016747.3-siRNA_03	LINC00886-ASO_10|AC016747.3-siRNA_03	ASO_G0240875_10	siRNA_G0212978_03	44	343	3
121	different target	LINC00886-ASO_01|LINC00667-siRNA_02	LINC00886-ASO_01|LINC00667-siRNA_02	ASO_G0240875_01	siRNA_G0263753_02	16	94	2
122	different target	LINC00886-ASO_01|LINC00667-siRNA_03	LINC00886-ASO_01|LINC00667-siRNA_03	ASO_G0240875_01	siRNA_G0263753_03	16	171	3
123	different target	LINC00886-ASO_10|LINC00667-siRNA_02	LINC00886-ASO_10|LINC00667-siRNA_02	ASO_G0240875_10	siRNA_G0263753_02	44	94	2
124	different target	LINC00886-ASO_10|LINC00667-siRNA_03	LINC00886-ASO_10|LINC00667-siRNA_03	ASO_G0240875_10	siRNA_G0263753_03	44	171	4
125	different target	LINC00886-ASO_01|LINC00938-siRNA_01	LINC00886-ASO_01|LINC00938-siRNA_01	ASO_G0240875_01	siRNA_G0273015_01	16	25	0
126	different target	LINC00886-ASO_01|LINC00938-siRNA_04	LINC00886-ASO_01|LINC00938-siRNA_04	ASO_G0240875_01	siRNA_G0273015_04	16	605	2
127	different target	LINC00886-ASO_10|LINC00938-siRNA_01	LINC00886-ASO_10|LINC00938-siRNA_01	ASO_G0240875_10	siRNA_G0273015_01	44	25	1
128	different target	LINC00886-ASO_10|LINC00938-siRNA_04	LINC00886-ASO_10|LINC00938-siRNA_04	ASO_G0240875_10	siRNA_G0273015_04	44	605	13
129	different target	LINC00886-ASO_01|LINC02454-siRNA_01	LINC00886-ASO_01|RP11-221N13.3-siRNA_01	ASO_G0240875_01	siRNA_G0256268_01	16	1014	1
130	different target	LINC00886-ASO_01|LINC02454-siRNA_03	LINC00886-ASO_01|RP11-221N13.3-siRNA_03	ASO_G0240875_01	siRNA_G0256268_03	16	391	1
131	different target	LINC00886-ASO_10|LINC02454-siRNA_01	LINC00886-ASO_10|RP11-221N13.3-siRNA_01	ASO_G0240875_10	siRNA_G0256268_01	44	1014	13
132	different target	LINC00886-ASO_10|LINC02454-siRNA_03	LINC00886-ASO_10|RP11-221N13.3-siRNA_03	ASO_G0240875_10	siRNA_G0256268_03	44	391	7
133	different target	LINC00886-ASO_01|MAPKAPK5-AS1-siRNA_01	LINC00886-ASO_01|MAPKAPK5-AS1-siRNA_01	ASO_G0240875_01	siRNA_G0234608_01	16	228	0
134	different target	LINC00886-ASO_01|MAPKAPK5-AS1-siRNA_03	LINC00886-ASO_01|MAPKAPK5-AS1-siRNA_03	ASO_G0240875_01	siRNA_G0234608_03	16	94	0
135	different target	LINC00886-ASO_10|MAPKAPK5-AS1-siRNA_01	LINC00886-ASO_10|MAPKAPK5-AS1-siRNA_01	ASO_G0240875_10	siRNA_G0234608_01	44	228	7
136	different target	LINC00886-ASO_10|MAPKAPK5-AS1-siRNA_03	LINC00886-ASO_10|MAPKAPK5-AS1-siRNA_03	ASO_G0240875_10	siRNA_G0234608_03	44	94	1
137	different target	LINC00886-ASO_01|RNASEH1-AS1-siRNA_02	LINC00886-ASO_01|AC108488.3-siRNA_02	ASO_G0240875_01	siRNA_G0234171_02	16	8	1
138	different target	LINC00886-ASO_01|RNASEH1-AS1-siRNA_04	LINC00886-ASO_01|AC108488.3-siRNA_04	ASO_G0240875_01	siRNA_G0234171_04	16	71	1
139	different target	LINC00886-ASO_10|RNASEH1-AS1-siRNA_02	LINC00886-ASO_10|AC108488.3-siRNA_02	ASO_G0240875_10	siRNA_G0234171_02	44	8	1
140	different target	LINC00886-ASO_10|RNASEH1-AS1-siRNA_04	LINC00886-ASO_10|AC108488.3-siRNA_04	ASO_G0240875_10	siRNA_G0234171_04	44	71	2
141	different target	LINC00886-ASO_01|ZNF213-AS1-siRNA_03	LINC00886-ASO_01|RP11-473M20.14-siRNA_03	ASO_G0240875_01	siRNA_G0263072_03	16	28	0
142	different target	LINC00886-ASO_01|ZNF213-AS1-siRNA_04	LINC00886-ASO_01|RP11-473M20.14-siRNA_04	ASO_G0240875_01	siRNA_G0263072_04	16	125	0
143	different target	LINC00886-ASO_10|ZNF213-AS1-siRNA_03	LINC00886-ASO_10|RP11-473M20.14-siRNA_03	ASO_G0240875_10	siRNA_G0263072_03	44	28	1
144	different target	LINC00886-ASO_10|ZNF213-AS1-siRNA_04	LINC00886-ASO_10|RP11-473M20.14-siRNA_04	ASO_G0240875_10	siRNA_G0263072_04	44	125	2
145	same target	LINC00938-ASO_AD07|LINC00938-siRNA_01	LINC00938-ASO_AD07|LINC00938-siRNA_01	ASO_G0273015_AD_07	siRNA_G0273015_01	241	25	1
146	same target	LINC00938-ASO_AD07|LINC00938-siRNA_04	LINC00938-ASO_AD07|LINC00938-siRNA_04	ASO_G0273015_AD_07	siRNA_G0273015_04	241	605	10
147	same target	LINC00938-ASO_AD10|LINC00938-siRNA_01	LINC00938-ASO_AD10|LINC00938-siRNA_01	ASO_G0273015_AD_10	siRNA_G0273015_01	5	25	1
148	same target	LINC00938-ASO_AD10|LINC00938-siRNA_04	LINC00938-ASO_AD10|LINC00938-siRNA_04	ASO_G0273015_AD_10	siRNA_G0273015_04	5	605	1
149	different target	LINC00938-ASO_AD07|A1BG-AS1-siRNA_03	LINC00938-ASO_AD07|A1BG-AS1-siRNA_03	ASO_G0273015_AD_07	siRNA_G0268895_03	241	90	4
150	different target	LINC00938-ASO_AD07|A1BG-AS1-siRNA_04	LINC00938-ASO_AD07|A1BG-AS1-siRNA_04	ASO_G0273015_AD_07	siRNA_G0268895_04	241	507	11
151	different target	LINC00938-ASO_AD10|A1BG-AS1-siRNA_03	LINC00938-ASO_AD10|A1BG-AS1-siRNA_03	ASO_G0273015_AD_10	siRNA_G0268895_03	5	90	2
152	different target	LINC00938-ASO_AD10|A1BG-AS1-siRNA_04	LINC00938-ASO_AD10|A1BG-AS1-siRNA_04	ASO_G0273015_AD_10	siRNA_G0268895_04	5	507	2
153	different target	LINC00938-ASO_AD07|AC016747.3-siRNA_02	LINC00938-ASO_AD07|AC016747.3-siRNA_02	ASO_G0273015_AD_07	siRNA_G0212978_02	241	1070	12
154	different target	LINC00938-ASO_AD07|AC016747.3-siRNA_03	LINC00938-ASO_AD07|AC016747.3-siRNA_03	ASO_G0273015_AD_07	siRNA_G0212978_03	241	343	7
155	different target	LINC00938-ASO_AD10|AC016747.3-siRNA_02	LINC00938-ASO_AD10|AC016747.3-siRNA_02	ASO_G0273015_AD_10	siRNA_G0212978_02	5	1070	0
156	different target	LINC00938-ASO_AD10|AC016747.3-siRNA_03	LINC00938-ASO_AD10|AC016747.3-siRNA_03	ASO_G0273015_AD_10	siRNA_G0212978_03	5	343	0
157	different target	LINC00938-ASO_AD07|LINC00667-siRNA_02	LINC00938-ASO_AD07|LINC00667-siRNA_02	ASO_G0273015_AD_07	siRNA_G0263753_02	241	94	3
158	different target	LINC00938-ASO_AD07|LINC00667-siRNA_03	LINC00938-ASO_AD07|LINC00667-siRNA_03	ASO_G0273015_AD_07	siRNA_G0263753_03	241	171	6
159	different target	LINC00938-ASO_AD10|LINC00667-siRNA_02	LINC00938-ASO_AD10|LINC00667-siRNA_02	ASO_G0273015_AD_10	siRNA_G0263753_02	5	94	2
160	different target	LINC00938-ASO_AD10|LINC00667-siRNA_03	LINC00938-ASO_AD10|LINC00667-siRNA_03	ASO_G0273015_AD_10	siRNA_G0263753_03	5	171	2
161	different target	LINC00938-ASO_AD07|LINC00886-siRNA_01	LINC00938-ASO_AD07|LINC00886-siRNA_01	ASO_G0273015_AD_07	siRNA_G0240875_01	241	37	1
162	different target	LINC00938-ASO_AD07|LINC00886-siRNA_04	LINC00938-ASO_AD07|LINC00886-siRNA_04	ASO_G0273015_AD_07	siRNA_G0240875_04	241	16	0
163	different target	LINC00938-ASO_AD10|LINC00886-siRNA_01	LINC00938-ASO_AD10|LINC00886-siRNA_01	ASO_G0273015_AD_10	siRNA_G0240875_01	5	37	0
164	different target	LINC00938-ASO_AD10|LINC00886-siRNA_04	LINC00938-ASO_AD10|LINC00886-siRNA_04	ASO_G0273015_AD_10	siRNA_G0240875_04	5	16	0
165	different target	LINC00938-ASO_AD07|LINC02454-siRNA_01	LINC00938-ASO_AD07|RP11-221N13.3-siRNA_01	ASO_G0273015_AD_07	siRNA_G0256268_01	241	1014	13
166	different target	LINC00938-ASO_AD07|LINC02454-siRNA_03	LINC00938-ASO_AD07|RP11-221N13.3-siRNA_03	ASO_G0273015_AD_07	siRNA_G0256268_03	241	391	7
167	different target	LINC00938-ASO_AD10|LINC02454-siRNA_01	LINC00938-ASO_AD10|RP11-221N13.3-siRNA_01	ASO_G0273015_AD_10	siRNA_G0256268_01	5	1014	0
168	different target	LINC00938-ASO_AD10|LINC02454-siRNA_03	LINC00938-ASO_AD10|RP11-221N13.3-siRNA_03	ASO_G0273015_AD_10	siRNA_G0256268_03	5	391	0
169	different target	LINC00938-ASO_AD07|MAPKAPK5-AS1-siRNA_01	LINC00938-ASO_AD07|MAPKAPK5-AS1-siRNA_01	ASO_G0273015_AD_07	siRNA_G0234608_01	241	228	3
170	different target	LINC00938-ASO_AD07|MAPKAPK5-AS1-siRNA_03	LINC00938-ASO_AD07|MAPKAPK5-AS1-siRNA_03	ASO_G0273015_AD_07	siRNA_G0234608_03	241	94	0
171	different target	LINC00938-ASO_AD10|MAPKAPK5-AS1-siRNA_01	LINC00938-ASO_AD10|MAPKAPK5-AS1-siRNA_01	ASO_G0273015_AD_10	siRNA_G0234608_01	5	228	0
172	different target	LINC00938-ASO_AD10|MAPKAPK5-AS1-siRNA_03	LINC00938-ASO_AD10|MAPKAPK5-AS1-siRNA_03	ASO_G0273015_AD_10	siRNA_G0234608_03	5	94	0
173	different target	LINC00938-ASO_AD07|RNASEH1-AS1-siRNA_02	LINC00938-ASO_AD07|AC108488.3-siRNA_02	ASO_G0273015_AD_07	siRNA_G0234171_02	241	8	0
174	different target	LINC00938-ASO_AD07|RNASEH1-AS1-siRNA_04	LINC00938-ASO_AD07|AC108488.3-siRNA_04	ASO_G0273015_AD_07	siRNA_G0234171_04	241	71	0
175	different target	LINC00938-ASO_AD10|RNASEH1-AS1-siRNA_02	LINC00938-ASO_AD10|AC108488.3-siRNA_02	ASO_G0273015_AD_10	siRNA_G0234171_02	5	8	0
176	different target	LINC00938-ASO_AD10|RNASEH1-AS1-siRNA_04	LINC00938-ASO_AD10|AC108488.3-siRNA_04	ASO_G0273015_AD_10	siRNA_G0234171_04	5	71	0
177	different target	LINC00938-ASO_AD07|ZNF213-AS1-siRNA_03	LINC00938-ASO_AD07|RP11-473M20.14-siRNA_03	ASO_G0273015_AD_07	siRNA_G0263072_03	241	28	0
178	different target	LINC00938-ASO_AD07|ZNF213-AS1-siRNA_04	LINC00938-ASO_AD07|RP11-473M20.14-siRNA_04	ASO_G0273015_AD_07	siRNA_G0263072_04	241	125	1
179	different target	LINC00938-ASO_AD10|ZNF213-AS1-siRNA_03	LINC00938-ASO_AD10|RP11-473M20.14-siRNA_03	ASO_G0273015_AD_10	siRNA_G0263072_03	5	28	0
180	different target	LINC00938-ASO_AD10|ZNF213-AS1-siRNA_04	LINC00938-ASO_AD10|RP11-473M20.14-siRNA_04	ASO_G0273015_AD_10	siRNA_G0263072_04	5	125	0
181	same target	LINC02454-ASO_AD06|LINC02454-siRNA_01	RP11-221N13.3-ASO_AD06|RP11-221N13.3-siRNA_01	ASO_G0256268_AD_06	siRNA_G0256268_01	275	1014	129
182	same target	LINC02454-ASO_AD06|LINC02454-siRNA_03	RP11-221N13.3-ASO_AD06|RP11-221N13.3-siRNA_03	ASO_G0256268_AD_06	siRNA_G0256268_03	275	391	89
183	same target	LINC02454-ASO_AD07|LINC02454-siRNA_01	RP11-221N13.3-ASO_AD07|RP11-221N13.3-siRNA_01	ASO_G0256268_AD_07	siRNA_G0256268_01	221	1014	92
184	same target	LINC02454-ASO_AD07|LINC02454-siRNA_03	RP11-221N13.3-ASO_AD07|RP11-221N13.3-siRNA_03	ASO_G0256268_AD_07	siRNA_G0256268_03	221	391	69
185	different target	LINC02454-ASO_AD06|A1BG-AS1-siRNA_03	RP11-221N13.3-ASO_AD06|A1BG-AS1-siRNA_03	ASO_G0256268_AD_06	siRNA_G0268895_03	275	90	9
186	different target	LINC02454-ASO_AD06|A1BG-AS1-siRNA_04	RP11-221N13.3-ASO_AD06|A1BG-AS1-siRNA_04	ASO_G0256268_AD_06	siRNA_G0268895_04	275	507	97
187	different target	LINC02454-ASO_AD07|A1BG-AS1-siRNA_03	RP11-221N13.3-ASO_AD07|A1BG-AS1-siRNA_03	ASO_G0256268_AD_07	siRNA_G0268895_03	221	90	4
188	different target	LINC02454-ASO_AD07|A1BG-AS1-siRNA_04	RP11-221N13.3-ASO_AD07|A1BG-AS1-siRNA_04	ASO_G0256268_AD_07	siRNA_G0268895_04	221	507	81
189	different target	LINC02454-ASO_AD06|AC016747.3-siRNA_02	RP11-221N13.3-ASO_AD06|AC016747.3-siRNA_02	ASO_G0256268_AD_06	siRNA_G0212978_02	275	1070	140
190	different target	LINC02454-ASO_AD06|AC016747.3-siRNA_03	RP11-221N13.3-ASO_AD06|AC016747.3-siRNA_03	ASO_G0256268_AD_06	siRNA_G0212978_03	275	343	49
191	different target	LINC02454-ASO_AD07|AC016747.3-siRNA_02	RP11-221N13.3-ASO_AD07|AC016747.3-siRNA_02	ASO_G0256268_AD_07	siRNA_G0212978_02	221	1070	99
192	different target	LINC02454-ASO_AD07|AC016747.3-siRNA_03	RP11-221N13.3-ASO_AD07|AC016747.3-siRNA_03	ASO_G0256268_AD_07	siRNA_G0212978_03	221	343	40
193	different target	LINC02454-ASO_AD06|LINC00667-siRNA_02	RP11-221N13.3-ASO_AD06|LINC00667-siRNA_02	ASO_G0256268_AD_06	siRNA_G0263753_02	275	94	7
194	different target	LINC02454-ASO_AD06|LINC00667-siRNA_03	RP11-221N13.3-ASO_AD06|LINC00667-siRNA_03	ASO_G0256268_AD_06	siRNA_G0263753_03	275	171	22
195	different target	LINC02454-ASO_AD07|LINC00667-siRNA_02	RP11-221N13.3-ASO_AD07|LINC00667-siRNA_02	ASO_G0256268_AD_07	siRNA_G0263753_02	221	94	3
196	different target	LINC02454-ASO_AD07|LINC00667-siRNA_03	RP11-221N13.3-ASO_AD07|LINC00667-siRNA_03	ASO_G0256268_AD_07	siRNA_G0263753_03	221	171	12
197	different target	LINC02454-ASO_AD06|LINC00886-siRNA_01	RP11-221N13.3-ASO_AD06|LINC00886-siRNA_01	ASO_G0256268_AD_06	siRNA_G0240875_01	275	37	2
198	different target	LINC02454-ASO_AD06|LINC00886-siRNA_04	RP11-221N13.3-ASO_AD06|LINC00886-siRNA_04	ASO_G0256268_AD_06	siRNA_G0240875_04	275	16	1
199	different target	LINC02454-ASO_AD07|LINC00886-siRNA_01	RP11-221N13.3-ASO_AD07|LINC00886-siRNA_01	ASO_G0256268_AD_07	siRNA_G0240875_01	221	37	0
200	different target	LINC02454-ASO_AD07|LINC00886-siRNA_04	RP11-221N13.3-ASO_AD07|LINC00886-siRNA_04	ASO_G0256268_AD_07	siRNA_G0240875_04	221	16	0
201	different target	LINC02454-ASO_AD06|LINC00938-siRNA_01	RP11-221N13.3-ASO_AD06|LINC00938-siRNA_01	ASO_G0256268_AD_06	siRNA_G0273015_01	275	25	2
202	different target	LINC02454-ASO_AD06|LINC00938-siRNA_04	RP11-221N13.3-ASO_AD06|LINC00938-siRNA_04	ASO_G0256268_AD_06	siRNA_G0273015_04	275	605	97
203	different target	LINC02454-ASO_AD07|LINC00938-siRNA_01	RP11-221N13.3-ASO_AD07|LINC00938-siRNA_01	ASO_G0256268_AD_07	siRNA_G0273015_01	221	25	4
204	different target	LINC02454-ASO_AD07|LINC00938-siRNA_04	RP11-221N13.3-ASO_AD07|LINC00938-siRNA_04	ASO_G0256268_AD_07	siRNA_G0273015_04	221	605	82
205	different target	LINC02454-ASO_AD06|MAPKAPK5-AS1-siRNA_01	RP11-221N13.3-ASO_AD06|MAPKAPK5-AS1-siRNA_01	ASO_G0256268_AD_06	siRNA_G0234608_01	275	228	67
206	different target	LINC02454-ASO_AD06|MAPKAPK5-AS1-siRNA_03	RP11-221N13.3-ASO_AD06|MAPKAPK5-AS1-siRNA_03	ASO_G0256268_AD_06	siRNA_G0234608_03	275	94	11
207	different target	LINC02454-ASO_AD07|MAPKAPK5-AS1-siRNA_01	RP11-221N13.3-ASO_AD07|MAPKAPK5-AS1-siRNA_01	ASO_G0256268_AD_07	siRNA_G0234608_01	221	228	51
208	different target	LINC02454-ASO_AD07|MAPKAPK5-AS1-siRNA_03	RP11-221N13.3-ASO_AD07|MAPKAPK5-AS1-siRNA_03	ASO_G0256268_AD_07	siRNA_G0234608_03	221	94	7
209	different target	LINC02454-ASO_AD06|RNASEH1-AS1-siRNA_02	RP11-221N13.3-ASO_AD06|AC108488.3-siRNA_02	ASO_G0256268_AD_06	siRNA_G0234171_02	275	8	0
210	different target	LINC02454-ASO_AD06|RNASEH1-AS1-siRNA_04	RP11-221N13.3-ASO_AD06|AC108488.3-siRNA_04	ASO_G0256268_AD_06	siRNA_G0234171_04	275	71	0
211	different target	LINC02454-ASO_AD07|RNASEH1-AS1-siRNA_02	RP11-221N13.3-ASO_AD07|AC108488.3-siRNA_02	ASO_G0256268_AD_07	siRNA_G0234171_02	221	8	0
212	different target	LINC02454-ASO_AD07|RNASEH1-AS1-siRNA_04	RP11-221N13.3-ASO_AD07|AC108488.3-siRNA_04	ASO_G0256268_AD_07	siRNA_G0234171_04	221	71	4
213	different target	LINC02454-ASO_AD06|ZNF213-AS1-siRNA_03	RP11-221N13.3-ASO_AD06|RP11-473M20.14-siRNA_03	ASO_G0256268_AD_06	siRNA_G0263072_03	275	28	2
214	different target	LINC02454-ASO_AD06|ZNF213-AS1-siRNA_04	RP11-221N13.3-ASO_AD06|RP11-473M20.14-siRNA_04	ASO_G0256268_AD_06	siRNA_G0263072_04	275	125	9
215	different target	LINC02454-ASO_AD07|ZNF213-AS1-siRNA_03	RP11-221N13.3-ASO_AD07|RP11-473M20.14-siRNA_03	ASO_G0256268_AD_07	siRNA_G0263072_03	221	28	2
216	different target	LINC02454-ASO_AD07|ZNF213-AS1-siRNA_04	RP11-221N13.3-ASO_AD07|RP11-473M20.14-siRNA_04	ASO_G0256268_AD_07	siRNA_G0263072_04	221	125	3
217	same target	MAPKAPK5-AS1-ASO_AD01|MAPKAPK5-AS1-siRNA_01	MAPKAPK5-AS1-ASO_AD01|MAPKAPK5-AS1-siRNA_01	ASO_G0234608_AD_01	siRNA_G0234608_01	440	228	3
218	same target	MAPKAPK5-AS1-ASO_AD01|MAPKAPK5-AS1-siRNA_03	MAPKAPK5-AS1-ASO_AD01|MAPKAPK5-AS1-siRNA_03	ASO_G0234608_AD_01	siRNA_G0234608_03	440	94	5
219	same target	MAPKAPK5-AS1-ASO_AD04|MAPKAPK5-AS1-siRNA_01	MAPKAPK5-AS1-ASO_AD04|MAPKAPK5-AS1-siRNA_01	ASO_G0234608_AD_04	siRNA_G0234608_01	629	228	110
220	same target	MAPKAPK5-AS1-ASO_AD04|MAPKAPK5-AS1-siRNA_03	MAPKAPK5-AS1-ASO_AD04|MAPKAPK5-AS1-siRNA_03	ASO_G0234608_AD_04	siRNA_G0234608_03	629	94	16
221	different target	MAPKAPK5-AS1-ASO_AD01|A1BG-AS1-siRNA_03	MAPKAPK5-AS1-ASO_AD01|A1BG-AS1-siRNA_03	ASO_G0234608_AD_01	siRNA_G0268895_03	440	90	7
222	different target	MAPKAPK5-AS1-ASO_AD01|A1BG-AS1-siRNA_04	MAPKAPK5-AS1-ASO_AD01|A1BG-AS1-siRNA_04	ASO_G0234608_AD_01	siRNA_G0268895_04	440	507	15
223	different target	MAPKAPK5-AS1-ASO_AD04|A1BG-AS1-siRNA_03	MAPKAPK5-AS1-ASO_AD04|A1BG-AS1-siRNA_03	ASO_G0234608_AD_04	siRNA_G0268895_03	629	90	9
224	different target	MAPKAPK5-AS1-ASO_AD04|A1BG-AS1-siRNA_04	MAPKAPK5-AS1-ASO_AD04|A1BG-AS1-siRNA_04	ASO_G0234608_AD_04	siRNA_G0268895_04	629	507	154
225	different target	MAPKAPK5-AS1-ASO_AD01|AC016747.3-siRNA_02	MAPKAPK5-AS1-ASO_AD01|AC016747.3-siRNA_02	ASO_G0234608_AD_01	siRNA_G0212978_02	440	1070	51
226	different target	MAPKAPK5-AS1-ASO_AD01|AC016747.3-siRNA_03	MAPKAPK5-AS1-ASO_AD01|AC016747.3-siRNA_03	ASO_G0234608_AD_01	siRNA_G0212978_03	440	343	11
227	different target	MAPKAPK5-AS1-ASO_AD04|AC016747.3-siRNA_02	MAPKAPK5-AS1-ASO_AD04|AC016747.3-siRNA_02	ASO_G0234608_AD_04	siRNA_G0212978_02	629	1070	211
228	different target	MAPKAPK5-AS1-ASO_AD04|AC016747.3-siRNA_03	MAPKAPK5-AS1-ASO_AD04|AC016747.3-siRNA_03	ASO_G0234608_AD_04	siRNA_G0212978_03	629	343	70
229	different target	MAPKAPK5-AS1-ASO_AD01|LINC00667-siRNA_02	MAPKAPK5-AS1-ASO_AD01|LINC00667-siRNA_02	ASO_G0234608_AD_01	siRNA_G0263753_02	440	94	8
230	different target	MAPKAPK5-AS1-ASO_AD01|LINC00667-siRNA_03	MAPKAPK5-AS1-ASO_AD01|LINC00667-siRNA_03	ASO_G0234608_AD_01	siRNA_G0263753_03	440	171	9
231	different target	MAPKAPK5-AS1-ASO_AD04|LINC00667-siRNA_02	MAPKAPK5-AS1-ASO_AD04|LINC00667-siRNA_02	ASO_G0234608_AD_04	siRNA_G0263753_02	629	94	6
232	different target	MAPKAPK5-AS1-ASO_AD04|LINC00667-siRNA_03	MAPKAPK5-AS1-ASO_AD04|LINC00667-siRNA_03	ASO_G0234608_AD_04	siRNA_G0263753_03	629	171	35
233	different target	MAPKAPK5-AS1-ASO_AD01|LINC00886-siRNA_01	MAPKAPK5-AS1-ASO_AD01|LINC00886-siRNA_01	ASO_G0234608_AD_01	siRNA_G0240875_01	440	37	2
234	different target	MAPKAPK5-AS1-ASO_AD01|LINC00886-siRNA_04	MAPKAPK5-AS1-ASO_AD01|LINC00886-siRNA_04	ASO_G0234608_AD_01	siRNA_G0240875_04	440	16	1
235	different target	MAPKAPK5-AS1-ASO_AD04|LINC00886-siRNA_01	MAPKAPK5-AS1-ASO_AD04|LINC00886-siRNA_01	ASO_G0234608_AD_04	siRNA_G0240875_01	629	37	3
236	different target	MAPKAPK5-AS1-ASO_AD04|LINC00886-siRNA_04	MAPKAPK5-AS1-ASO_AD04|LINC00886-siRNA_04	ASO_G0234608_AD_04	siRNA_G0240875_04	629	16	2
237	different target	MAPKAPK5-AS1-ASO_AD01|LINC00938-siRNA_01	MAPKAPK5-AS1-ASO_AD01|LINC00938-siRNA_01	ASO_G0234608_AD_01	siRNA_G0273015_01	440	25	0
238	different target	MAPKAPK5-AS1-ASO_AD01|LINC00938-siRNA_04	MAPKAPK5-AS1-ASO_AD01|LINC00938-siRNA_04	ASO_G0234608_AD_01	siRNA_G0273015_04	440	605	20
239	different target	MAPKAPK5-AS1-ASO_AD04|LINC00938-siRNA_01	MAPKAPK5-AS1-ASO_AD04|LINC00938-siRNA_01	ASO_G0234608_AD_04	siRNA_G0273015_01	629	25	2
240	different target	MAPKAPK5-AS1-ASO_AD04|LINC00938-siRNA_04	MAPKAPK5-AS1-ASO_AD04|LINC00938-siRNA_04	ASO_G0234608_AD_04	siRNA_G0273015_04	629	605	161
241	different target	MAPKAPK5-AS1-ASO_AD01|LINC02454-siRNA_01	MAPKAPK5-AS1-ASO_AD01|RP11-221N13.3-siRNA_01	ASO_G0234608_AD_01	siRNA_G0256268_01	440	1014	36
242	different target	MAPKAPK5-AS1-ASO_AD01|LINC02454-siRNA_03	MAPKAPK5-AS1-ASO_AD01|RP11-221N13.3-siRNA_03	ASO_G0234608_AD_01	siRNA_G0256268_03	440	391	15
243	different target	MAPKAPK5-AS1-ASO_AD04|LINC02454-siRNA_01	MAPKAPK5-AS1-ASO_AD04|RP11-221N13.3-siRNA_01	ASO_G0234608_AD_04	siRNA_G0256268_01	629	1014	192
244	different target	MAPKAPK5-AS1-ASO_AD04|LINC02454-siRNA_03	MAPKAPK5-AS1-ASO_AD04|RP11-221N13.3-siRNA_03	ASO_G0234608_AD_04	siRNA_G0256268_03	629	391	115
245	different target	MAPKAPK5-AS1-ASO_AD01|RNASEH1-AS1-siRNA_02	MAPKAPK5-AS1-ASO_AD01|AC108488.3-siRNA_02	ASO_G0234608_AD_01	siRNA_G0234171_02	440	8	0
246	different target	MAPKAPK5-AS1-ASO_AD01|RNASEH1-AS1-siRNA_04	MAPKAPK5-AS1-ASO_AD01|AC108488.3-siRNA_04	ASO_G0234608_AD_01	siRNA_G0234171_04	440	71	4
247	different target	MAPKAPK5-AS1-ASO_AD04|RNASEH1-AS1-siRNA_02	MAPKAPK5-AS1-ASO_AD04|AC108488.3-siRNA_02	ASO_G0234608_AD_04	siRNA_G0234171_02	629	8	0
248	different target	MAPKAPK5-AS1-ASO_AD04|RNASEH1-AS1-siRNA_04	MAPKAPK5-AS1-ASO_AD04|AC108488.3-siRNA_04	ASO_G0234608_AD_04	siRNA_G0234171_04	629	71	5
249	different target	MAPKAPK5-AS1-ASO_AD01|ZNF213-AS1-siRNA_03	MAPKAPK5-AS1-ASO_AD01|RP11-473M20.14-siRNA_03	ASO_G0234608_AD_01	siRNA_G0263072_03	440	28	1
250	different target	MAPKAPK5-AS1-ASO_AD01|ZNF213-AS1-siRNA_04	MAPKAPK5-AS1-ASO_AD01|RP11-473M20.14-siRNA_04	ASO_G0234608_AD_01	siRNA_G0263072_04	440	125	3
251	different target	MAPKAPK5-AS1-ASO_AD04|ZNF213-AS1-siRNA_03	MAPKAPK5-AS1-ASO_AD04|RP11-473M20.14-siRNA_03	ASO_G0234608_AD_04	siRNA_G0263072_03	629	28	3
252	different target	MAPKAPK5-AS1-ASO_AD04|ZNF213-AS1-siRNA_04	MAPKAPK5-AS1-ASO_AD04|RP11-473M20.14-siRNA_04	ASO_G0234608_AD_04	siRNA_G0263072_04	629	125	11
253	same target	RNASEH1-AS1-ASO_02|RNASEH1-AS1-siRNA_02	AC108488.3-ASO_02|AC108488.3-siRNA_02	ASO_G0234171_02	siRNA_G0234171_02	2020	8	2
254	same target	RNASEH1-AS1-ASO_02|RNASEH1-AS1-siRNA_04	AC108488.3-ASO_02|AC108488.3-siRNA_04	ASO_G0234171_02	siRNA_G0234171_04	2020	71	9
255	same target	RNASEH1-AS1-ASO_09|RNASEH1-AS1-siRNA_02	AC108488.3-ASO_09|AC108488.3-siRNA_02	ASO_G0234171_09	siRNA_G0234171_02	825	8	1
256	same target	RNASEH1-AS1-ASO_09|RNASEH1-AS1-siRNA_04	AC108488.3-ASO_09|AC108488.3-siRNA_04	ASO_G0234171_09	siRNA_G0234171_04	825	71	8
257	different target	RNASEH1-AS1-ASO_02|A1BG-AS1-siRNA_03	AC108488.3-ASO_02|A1BG-AS1-siRNA_03	ASO_G0234171_02	siRNA_G0268895_03	2020	90	7
258	different target	RNASEH1-AS1-ASO_02|A1BG-AS1-siRNA_04	AC108488.3-ASO_02|A1BG-AS1-siRNA_04	ASO_G0234171_02	siRNA_G0268895_04	2020	507	20
259	different target	RNASEH1-AS1-ASO_09|A1BG-AS1-siRNA_03	AC108488.3-ASO_09|A1BG-AS1-siRNA_03	ASO_G0234171_09	siRNA_G0268895_03	825	90	6
260	different target	RNASEH1-AS1-ASO_09|A1BG-AS1-siRNA_04	AC108488.3-ASO_09|A1BG-AS1-siRNA_04	ASO_G0234171_09	siRNA_G0268895_04	825	507	14
261	different target	RNASEH1-AS1-ASO_02|AC016747.3-siRNA_02	AC108488.3-ASO_02|AC016747.3-siRNA_02	ASO_G0234171_02	siRNA_G0212978_02	2020	1070	37
262	different target	RNASEH1-AS1-ASO_02|AC016747.3-siRNA_03	AC108488.3-ASO_02|AC016747.3-siRNA_03	ASO_G0234171_02	siRNA_G0212978_03	2020	343	23
263	different target	RNASEH1-AS1-ASO_09|AC016747.3-siRNA_02	AC108488.3-ASO_09|AC016747.3-siRNA_02	ASO_G0234171_09	siRNA_G0212978_02	825	1070	14
264	different target	RNASEH1-AS1-ASO_09|AC016747.3-siRNA_03	AC108488.3-ASO_09|AC016747.3-siRNA_03	ASO_G0234171_09	siRNA_G0212978_03	825	343	9
265	different target	RNASEH1-AS1-ASO_02|LINC00667-siRNA_02	AC108488.3-ASO_02|LINC00667-siRNA_02	ASO_G0234171_02	siRNA_G0263753_02	2020	94	8
266	different target	RNASEH1-AS1-ASO_02|LINC00667-siRNA_03	AC108488.3-ASO_02|LINC00667-siRNA_03	ASO_G0234171_02	siRNA_G0263753_03	2020	171	18
267	different target	RNASEH1-AS1-ASO_09|LINC00667-siRNA_02	AC108488.3-ASO_09|LINC00667-siRNA_02	ASO_G0234171_09	siRNA_G0263753_02	825	94	9
268	different target	RNASEH1-AS1-ASO_09|LINC00667-siRNA_03	AC108488.3-ASO_09|LINC00667-siRNA_03	ASO_G0234171_09	siRNA_G0263753_03	825	171	8
269	different target	RNASEH1-AS1-ASO_02|LINC00886-siRNA_01	AC108488.3-ASO_02|LINC00886-siRNA_01	ASO_G0234171_02	siRNA_G0240875_01	2020	37	9
270	different target	RNASEH1-AS1-ASO_02|LINC00886-siRNA_04	AC108488.3-ASO_02|LINC00886-siRNA_04	ASO_G0234171_02	siRNA_G0240875_04	2020	16	3
271	different target	RNASEH1-AS1-ASO_09|LINC00886-siRNA_01	AC108488.3-ASO_09|LINC00886-siRNA_01	ASO_G0234171_09	siRNA_G0240875_01	825	37	5
272	different target	RNASEH1-AS1-ASO_09|LINC00886-siRNA_04	AC108488.3-ASO_09|LINC00886-siRNA_04	ASO_G0234171_09	siRNA_G0240875_04	825	16	2
273	different target	RNASEH1-AS1-ASO_02|LINC00938-siRNA_01	AC108488.3-ASO_02|LINC00938-siRNA_01	ASO_G0234171_02	siRNA_G0273015_01	2020	25	0
274	different target	RNASEH1-AS1-ASO_02|LINC00938-siRNA_04	AC108488.3-ASO_02|LINC00938-siRNA_04	ASO_G0234171_02	siRNA_G0273015_04	2020	605	25
275	different target	RNASEH1-AS1-ASO_09|LINC00938-siRNA_01	AC108488.3-ASO_09|LINC00938-siRNA_01	ASO_G0234171_09	siRNA_G0273015_01	825	25	1
276	different target	RNASEH1-AS1-ASO_09|LINC00938-siRNA_04	AC108488.3-ASO_09|LINC00938-siRNA_04	ASO_G0234171_09	siRNA_G0273015_04	825	605	23
277	different target	RNASEH1-AS1-ASO_02|LINC02454-siRNA_01	AC108488.3-ASO_02|RP11-221N13.3-siRNA_01	ASO_G0234171_02	siRNA_G0256268_01	2020	1014	52
278	different target	RNASEH1-AS1-ASO_02|LINC02454-siRNA_03	AC108488.3-ASO_02|RP11-221N13.3-siRNA_03	ASO_G0234171_02	siRNA_G0256268_03	2020	391	17
279	different target	RNASEH1-AS1-ASO_09|LINC02454-siRNA_01	AC108488.3-ASO_09|RP11-221N13.3-siRNA_01	ASO_G0234171_09	siRNA_G0256268_01	825	1014	21
280	different target	RNASEH1-AS1-ASO_09|LINC02454-siRNA_03	AC108488.3-ASO_09|RP11-221N13.3-siRNA_03	ASO_G0234171_09	siRNA_G0256268_03	825	391	5
281	different target	RNASEH1-AS1-ASO_02|MAPKAPK5-AS1-siRNA_01	AC108488.3-ASO_02|MAPKAPK5-AS1-siRNA_01	ASO_G0234171_02	siRNA_G0234608_01	2020	228	5
282	different target	RNASEH1-AS1-ASO_02|MAPKAPK5-AS1-siRNA_03	AC108488.3-ASO_02|MAPKAPK5-AS1-siRNA_03	ASO_G0234171_02	siRNA_G0234608_03	2020	94	1
283	different target	RNASEH1-AS1-ASO_09|MAPKAPK5-AS1-siRNA_01	AC108488.3-ASO_09|MAPKAPK5-AS1-siRNA_01	ASO_G0234171_09	siRNA_G0234608_01	825	228	4
284	different target	RNASEH1-AS1-ASO_09|MAPKAPK5-AS1-siRNA_03	AC108488.3-ASO_09|MAPKAPK5-AS1-siRNA_03	ASO_G0234171_09	siRNA_G0234608_03	825	94	0
285	different target	RNASEH1-AS1-ASO_02|ZNF213-AS1-siRNA_03	AC108488.3-ASO_02|RP11-473M20.14-siRNA_03	ASO_G0234171_02	siRNA_G0263072_03	2020	28	3
286	different target	RNASEH1-AS1-ASO_02|ZNF213-AS1-siRNA_04	AC108488.3-ASO_02|RP11-473M20.14-siRNA_04	ASO_G0234171_02	siRNA_G0263072_04	2020	125	15
287	different target	RNASEH1-AS1-ASO_09|ZNF213-AS1-siRNA_03	AC108488.3-ASO_09|RP11-473M20.14-siRNA_03	ASO_G0234171_09	siRNA_G0263072_03	825	28	5
288	different target	RNASEH1-AS1-ASO_09|ZNF213-AS1-siRNA_04	AC108488.3-ASO_09|RP11-473M20.14-siRNA_04	ASO_G0234171_09	siRNA_G0263072_04	825	125	9
289	same target	ZNF213-AS1-ASO_02|ZNF213-AS1-siRNA_03	RP11-473M20.14-ASO_02|RP11-473M20.14-siRNA_03	ASO_G0263072_02	siRNA_G0263072_03	2301	28	3
290	same target	ZNF213-AS1-ASO_02|ZNF213-AS1-siRNA_04	RP11-473M20.14-ASO_02|RP11-473M20.14-siRNA_04	ASO_G0263072_02	siRNA_G0263072_04	2301	125	16
291	same target	ZNF213-AS1-ASO_05|ZNF213-AS1-siRNA_03	RP11-473M20.14-ASO_05|RP11-473M20.14-siRNA_03	ASO_G0263072_05	siRNA_G0263072_03	474	28	5
292	same target	ZNF213-AS1-ASO_05|ZNF213-AS1-siRNA_04	RP11-473M20.14-ASO_05|RP11-473M20.14-siRNA_04	ASO_G0263072_05	siRNA_G0263072_04	474	125	7
293	different target	ZNF213-AS1-ASO_02|A1BG-AS1-siRNA_03	RP11-473M20.14-ASO_02|A1BG-AS1-siRNA_03	ASO_G0263072_02	siRNA_G0268895_03	2301	90	24
294	different target	ZNF213-AS1-ASO_02|A1BG-AS1-siRNA_04	RP11-473M20.14-ASO_02|A1BG-AS1-siRNA_04	ASO_G0263072_02	siRNA_G0268895_04	2301	507	41
295	different target	ZNF213-AS1-ASO_05|A1BG-AS1-siRNA_03	RP11-473M20.14-ASO_05|A1BG-AS1-siRNA_03	ASO_G0263072_05	siRNA_G0268895_03	474	90	7
296	different target	ZNF213-AS1-ASO_05|A1BG-AS1-siRNA_04	RP11-473M20.14-ASO_05|A1BG-AS1-siRNA_04	ASO_G0263072_05	siRNA_G0268895_04	474	507	10
297	different target	ZNF213-AS1-ASO_02|AC016747.3-siRNA_02	RP11-473M20.14-ASO_02|AC016747.3-siRNA_02	ASO_G0263072_02	siRNA_G0212978_02	2301	1070	133
298	different target	ZNF213-AS1-ASO_02|AC016747.3-siRNA_03	RP11-473M20.14-ASO_02|AC016747.3-siRNA_03	ASO_G0263072_02	siRNA_G0212978_03	2301	343	38
299	different target	ZNF213-AS1-ASO_05|AC016747.3-siRNA_02	RP11-473M20.14-ASO_05|AC016747.3-siRNA_02	ASO_G0263072_05	siRNA_G0212978_02	474	1070	35
300	different target	ZNF213-AS1-ASO_05|AC016747.3-siRNA_03	RP11-473M20.14-ASO_05|AC016747.3-siRNA_03	ASO_G0263072_05	siRNA_G0212978_03	474	343	7
301	different target	ZNF213-AS1-ASO_02|LINC00667-siRNA_02	RP11-473M20.14-ASO_02|LINC00667-siRNA_02	ASO_G0263072_02	siRNA_G0263753_02	2301	94	31
302	different target	ZNF213-AS1-ASO_02|LINC00667-siRNA_03	RP11-473M20.14-ASO_02|LINC00667-siRNA_03	ASO_G0263072_02	siRNA_G0263753_03	2301	171	25
303	different target	ZNF213-AS1-ASO_05|LINC00667-siRNA_02	RP11-473M20.14-ASO_05|LINC00667-siRNA_02	ASO_G0263072_05	siRNA_G0263753_02	474	94	9
304	different target	ZNF213-AS1-ASO_05|LINC00667-siRNA_03	RP11-473M20.14-ASO_05|LINC00667-siRNA_03	ASO_G0263072_05	siRNA_G0263753_03	474	171	15
305	different target	ZNF213-AS1-ASO_02|LINC00886-siRNA_01	RP11-473M20.14-ASO_02|LINC00886-siRNA_01	ASO_G0263072_02	siRNA_G0240875_01	2301	37	4
306	different target	ZNF213-AS1-ASO_02|LINC00886-siRNA_04	RP11-473M20.14-ASO_02|LINC00886-siRNA_04	ASO_G0263072_02	siRNA_G0240875_04	2301	16	1
307	different target	ZNF213-AS1-ASO_05|LINC00886-siRNA_01	RP11-473M20.14-ASO_05|LINC00886-siRNA_01	ASO_G0263072_05	siRNA_G0240875_01	474	37	2
308	different target	ZNF213-AS1-ASO_05|LINC00886-siRNA_04	RP11-473M20.14-ASO_05|LINC00886-siRNA_04	ASO_G0263072_05	siRNA_G0240875_04	474	16	0
309	different target	ZNF213-AS1-ASO_02|LINC00938-siRNA_01	RP11-473M20.14-ASO_02|LINC00938-siRNA_01	ASO_G0263072_02	siRNA_G0273015_01	2301	25	2
310	different target	ZNF213-AS1-ASO_02|LINC00938-siRNA_04	RP11-473M20.14-ASO_02|LINC00938-siRNA_04	ASO_G0263072_02	siRNA_G0273015_04	2301	605	55
311	different target	ZNF213-AS1-ASO_05|LINC00938-siRNA_01	RP11-473M20.14-ASO_05|LINC00938-siRNA_01	ASO_G0263072_05	siRNA_G0273015_01	474	25	0
312	different target	ZNF213-AS1-ASO_05|LINC00938-siRNA_04	RP11-473M20.14-ASO_05|LINC00938-siRNA_04	ASO_G0263072_05	siRNA_G0273015_04	474	605	9
313	different target	ZNF213-AS1-ASO_02|LINC02454-siRNA_01	RP11-473M20.14-ASO_02|RP11-221N13.3-siRNA_01	ASO_G0263072_02	siRNA_G0256268_01	2301	1014	128
314	different target	ZNF213-AS1-ASO_02|LINC02454-siRNA_03	RP11-473M20.14-ASO_02|RP11-221N13.3-siRNA_03	ASO_G0263072_02	siRNA_G0256268_03	2301	391	44
315	different target	ZNF213-AS1-ASO_05|LINC02454-siRNA_01	RP11-473M20.14-ASO_05|RP11-221N13.3-siRNA_01	ASO_G0263072_05	siRNA_G0256268_01	474	1014	18
316	different target	ZNF213-AS1-ASO_05|LINC02454-siRNA_03	RP11-473M20.14-ASO_05|RP11-221N13.3-siRNA_03	ASO_G0263072_05	siRNA_G0256268_03	474	391	4
317	different target	ZNF213-AS1-ASO_02|MAPKAPK5-AS1-siRNA_01	RP11-473M20.14-ASO_02|MAPKAPK5-AS1-siRNA_01	ASO_G0263072_02	siRNA_G0234608_01	2301	228	16
318	different target	ZNF213-AS1-ASO_02|MAPKAPK5-AS1-siRNA_03	RP11-473M20.14-ASO_02|MAPKAPK5-AS1-siRNA_03	ASO_G0263072_02	siRNA_G0234608_03	2301	94	8
319	different target	ZNF213-AS1-ASO_05|MAPKAPK5-AS1-siRNA_01	RP11-473M20.14-ASO_05|MAPKAPK5-AS1-siRNA_01	ASO_G0263072_05	siRNA_G0234608_01	474	228	3
320	different target	ZNF213-AS1-ASO_05|MAPKAPK5-AS1-siRNA_03	RP11-473M20.14-ASO_05|MAPKAPK5-AS1-siRNA_03	ASO_G0263072_05	siRNA_G0234608_03	474	94	1
321	different target	ZNF213-AS1-ASO_02|RNASEH1-AS1-siRNA_02	RP11-473M20.14-ASO_02|AC108488.3-siRNA_02	ASO_G0263072_02	siRNA_G0234171_02	2301	8	0
322	different target	ZNF213-AS1-ASO_02|RNASEH1-AS1-siRNA_04	RP11-473M20.14-ASO_02|AC108488.3-siRNA_04	ASO_G0263072_02	siRNA_G0234171_04	2301	71	5
323	different target	ZNF213-AS1-ASO_05|RNASEH1-AS1-siRNA_02	RP11-473M20.14-ASO_05|AC108488.3-siRNA_02	ASO_G0263072_05	siRNA_G0234171_02	474	8	0
324	different target	ZNF213-AS1-ASO_05|RNASEH1-AS1-siRNA_04	RP11-473M20.14-ASO_05|AC108488.3-siRNA_04	ASO_G0263072_05	siRNA_G0234171_04	474	71	5
