# Supplementary material for: Functional annotation of human long noncoding RNAs via molecular phenotyping
Source: Genome Res. 2020 Jul;30(7):1060–72. doi: 10.1101/gr.254219.119 (PMC7397864; doi:10.1101/gr.254219.119)
Supplement: Supplemental Material [file supp_gr.254219.119_Supplemental_Table_S6.xlsx]

## Sheet: Info
	Supplemental Table S6. MARA/GSEA correlations with growth and with morphology measurements.
	Table S6A. MARA Incucyte correlations.			Table S6B. GSEA Incucycte correlations.
	ID	Description		ID	Description
1	motif	binding motif	1	pathway	GSEA pathway
2	motif.TFs.tpm	expression of all known TFs associated with a given motif (Z-score)	2	size	GSEA pathway size
3	GrowthRate_rho	Spearman correlation value for the growth rate with a given motif (Z-score)	3	GrowthRate_rho	Spearman correlation value for the growth rate with a given pathway (-log10 pvalue*sign(NES)))
4	GrowthRate_pvalue	Spearman p value for the growth rate with a given motif (Z-score)	4	GrowthRate_pvalue	Spearman p value for the growth rate with a given pathway (-log10 pvalue*sign(NES)))
5	GrowthRate_fdr	Spearman fdr for the growth rate with a given motif (Z-score)	5	GrowthRate_fdr	Spearman fdr for the growth rate with a given pathway (-log10 pvalue*sign(NES)))
6	GrowthRate_enrichment	enrichment of the correlation (as above): -log10(fdr)*sign(rho)	6	GrowthRate_enrichment.GSEA_pval	enrichment of the correlation (as above): -log10(fdr)*sign(rho)
7	Area_rho	same as above but for a different morphology	7	Area_rho	same as above but for a different morphology
8	Area_pvalue	same as above but for a different morphology	8	Area_pvalue	same as above but for a different morphology
9	Area_fdr	same as above but for a different morphology	9	Area_fdr	same as above but for a different morphology
10	Area_enrichment	same as above but for a different morphology	10	Area_enrichment.GSEA_pval	same as above but for a different morphology
11	Compactness_rho	same as above but for a different morphology	11	Compactness_rho	same as above but for a different morphology
12	Compactness_pvalue	same as above but for a different morphology	12	Compactness_pvalue	same as above but for a different morphology
13	Compactness_fdr	same as above but for a different morphology	13	Compactness_fdr	same as above but for a different morphology
14	Compactness_enrichment	same as above but for a different morphology	14	Compactness_enrichment.GSEA_pval	same as above but for a different morphology
15	Eccentricity_rho	same as above but for a different morphology	15	Eccentricity_rho	same as above but for a different morphology
16	Eccentricity_pvalue	same as above but for a different morphology	16	Eccentricity_pvalue	same as above but for a different morphology
17	Eccentricity_fdr	same as above but for a different morphology	17	Eccentricity_fdr	same as above but for a different morphology
18	Eccentricity_enrichment	same as above but for a different morphology	18	Eccentricity_enrichment.GSEA_pval	same as above but for a different morphology
19	Extent_rho	same as above but for a different morphology	19	Extent_rho	same as above but for a different morphology
20	Extent_pvalue	same as above but for a different morphology	20	Extent_pvalue	same as above but for a different morphology
21	Extent_fdr	same as above but for a different morphology	21	Extent_fdr	same as above but for a different morphology
22	Extent_enrichment	same as above but for a different morphology	22	Extent_enrichment.GSEA_pval	same as above but for a different morphology
23	FormFactor_rho	same as above but for a different morphology	23	FormFactor_rho	same as above but for a different morphology
24	FormFactor_pvalue	same as above but for a different morphology	24	FormFactor_pvalue	same as above but for a different morphology
25	FormFactor_fdr	same as above but for a different morphology	25	FormFactor_fdr	same as above but for a different morphology
26	FormFactor_enrichment	same as above but for a different morphology	26	FormFactor_enrichment.GSEA_pval	same as above but for a different morphology
27	MajorAxisLength_rho	same as above but for a different morphology	27	MajorAxisLength_rho	same as above but for a different morphology
28	MajorAxisLength_pvalue	same as above but for a different morphology	28	MajorAxisLength_pvalue	same as above but for a different morphology
29	MajorAxisLength_fdr	same as above but for a different morphology	29	MajorAxisLength_fdr	same as above but for a different morphology
30	MajorAxisLength_enrichment	same as above but for a different morphology	30	MajorAxisLength_enrichment.GSEA_pval	same as above but for a different morphology
31	MaxFeretDiameter_rho	same as above but for a different morphology	31	MaxFeretDiameter_rho	same as above but for a different morphology
32	MaxFeretDiameter_pvalue	same as above but for a different morphology	32	MaxFeretDiameter_pvalue	same as above but for a different morphology
33	MaxFeretDiameter_fdr	same as above but for a different morphology	33	MaxFeretDiameter_fdr	same as above but for a different morphology
34	MaxFeretDiameter_enrichment	same as above but for a different morphology	34	MaxFeretDiameter_enrichment.GSEA_pval	same as above but for a different morphology
35	MaximumRadius_rho	same as above but for a different morphology	35	MaximumRadius_rho	same as above but for a different morphology
36	MaximumRadius_pvalue	same as above but for a different morphology	36	MaximumRadius_pvalue	same as above but for a different morphology
37	MaximumRadius_fdr	same as above but for a different morphology	37	MaximumRadius_fdr	same as above but for a different morphology
38	MaximumRadius_enrichment	same as above but for a different morphology	38	MaximumRadius_enrichment	same as above but for a different morphology
39	MedianRadius_rho	same as above but for a different morphology	39	MedianRadius_rho	same as above but for a different morphology
40	MedianRadius_pvalue	same as above but for a different morphology	40	MedianRadius_pvalue	same as above but for a different morphology
41	MedianRadius_fdr	same as above but for a different morphology	41	MedianRadius_fdr	same as above but for a different morphology
42	MedianRadius_enrichment	same as above but for a different morphology	42	MedianRadius_enrichment	same as above but for a different morphology
43	MinFeretDiameter_rho	same as above but for a different morphology	43	MinFeretDiameter_rho	same as above but for a different morphology
44	MinFeretDiameter_pvalue	same as above but for a different morphology	44	MinFeretDiameter_pvalue	same as above but for a different morphology
45	MinFeretDiameter_fdr	same as above but for a different morphology	45	MinFeretDiameter_pvalue	same as above but for a different morphology
46	MinFeretDiameter_enrichment	same as above but for a different morphology	46	MinFeretDiameter_pvalue	same as above but for a different morphology
47	MinorAxisLength_rho	same as above but for a different morphology	47	MinFeretDiameter_pvalue	same as above but for a different morphology
48	MinorAxisLength_pvalue	same as above but for a different morphology	48	MinFeretDiameter_pvalue	same as above but for a different morphology
49	MinorAxisLength_fdr	same as above but for a different morphology	49	MinFeretDiameter_pvalue	same as above but for a different morphology
50	MinorAxisLength_enrichment	same as above but for a different morphology	50	MinFeretDiameter_pvalue	same as above but for a different morphology
51	Perimeter_rho	same as above but for a different morphology	51	MinFeretDiameter_pvalue	same as above but for a different morphology
52	Perimeter_pvalue	same as above but for a different morphology	52	MinFeretDiameter_pvalue	same as above but for a different morphology
53	Perimeter_fdr	same as above but for a different morphology	53	MinFeretDiameter_pvalue	same as above but for a different morphology
54	Perimeter_enrichment	same as above but for a different morphology	54	MinFeretDiameter_pvalue	same as above but for a different morphology
55	Solidity_rho	same as above but for a different morphology	55	MinFeretDiameter_pvalue	same as above but for a different morphology
56	Solidity_pvalue	same as above but for a different morphology	56	MinFeretDiameter_pvalue	same as above but for a different morphology
57	Solidity_fdr	same as above but for a different morphology	57	MinFeretDiameter_pvalue	same as above but for a different morphology
58	Solidity_enrichment	same as above but for a different morphology	58	MinFeretDiameter_pvalue	same as above but for a different morphology

## Sheet: Table S6A
	motif	motif.TFs.tpm	GrowthRate_rho	GrowthRate_pvalue	GrowthRate_fdr	GrowthRate_enrichment	Area_rho	Area_pvalue	Area_fdr	Area_enrichment	Compactness_rho	Compactness_pvalue	Compactness_fdr	Compactness_enrichment	Eccentricity_rho	Eccentricity_pvalue	Eccentricity_fdr	Eccentricity_enrichment	Extent_rho	Extent_pvalue	Extent_fdr	Extent_enrichment	FormFactor_rho	FormFactor_pvalue	FormFactor_fdr	FormFactor_enrichment	MajorAxisLength_rho	MajorAxisLength_pvalue	MajorAxisLength_fdr	MajorAxisLength_enrichment	MaxFeretDiameter_rho	MaxFeretDiameter_pvalue	MaxFeretDiameter_fdr	MaxFeretDiameter_enrichment	MaximumRadius_rho	MaximumRadius_pvalue	MaximumRadius_fdr	MaximumRadius_enrichment	MedianRadius_rho	MedianRadius_pvalue	MedianRadius_fdr	MedianRadius_enrichment	MinFeretDiameter_rho	MinFeretDiameter_pvalue	MinFeretDiameter_fdr	MinFeretDiameter_enrichment	MinorAxisLength_rho	MinorAxisLength_pvalue	MinorAxisLength_fdr
1	AHR_ARNT_ARNT2	121.702	0.156704	0.00380393	0.0116069	1.93528	0.0146017	0.78839	0.836992	0.0772787	0.0345049	0.525837	0.56886	0.244995	0.0771653	0.155614	0.205756	0.686646	-0.0188895	0.728419	0.760368	-0.118976	0.00389857	0.942875	0.950865	0.021881	0.0445549	0.412633	0.458909	0.338273	0.0488913	0.368612	0.41382	0.383189	0.00817023	0.880626	0.951059	0.0217925	0.0613311	0.259266	0.505781	0.296038	-0.00742496	0.891444	0.933887	-0.0297055	0.00612676	0.910337	0.974962
2	ARNT_ARNT2_BHLHB2_MAX_MYC_USF1	248.317	-0.163946	0.00245295	0.0085082	-2.07016	-0.304065	1.25014e-08	2.97533e-07	-6.52646	-0.174442	0.00125869	0.00325618	-2.48729	-0.15556	0.00407041	0.010764	-1.96803	0.121023	0.0256977	0.0470409	1.32752	0.191922	0.000381027	0.00122546	2.9117	-0.253584	2.35646e-06	1.16841e-05	-4.9324	-0.242778	6.35725e-06	3.02605e-05	-4.51912	-0.170831	0.00159017	0.0270329	-1.56811	-0.137087	0.011443	0.105335	-0.977427	-0.176788	0.00107878	0.0127288	-1.89521	-0.151629	0.00511994	0.0487906
3	ATF4	273.335	-0.15493	0.00422439	0.012261	-1.91147	-0.185303	0.000606534	0.00156908	-2.80436	-0.148081	0.00626971	0.0124805	-1.90377	-0.1151	0.0339225	0.0583823	-1.23372	0.0861758	0.112687	0.167622	0.77567	0.133041	0.0141389	0.0275824	1.55937	-0.181397	0.000792341	0.00174051	-2.75932	-0.169581	0.00172245	0.00354901	-2.44989	-0.0705653	0.194189	0.442956	-0.353639	-0.0493783	0.363858	0.593138	-0.226844	-0.111666	0.039646	0.11531	-0.938133	-0.089428	0.0997072	0.275934
4	ATF5_CREB3	133.315	-0.0337962	0.534376	0.629611	-0.200927	-0.193721	0.000334923	0.00094895	-3.02276	-0.269299	5.1383e-07	3.39699e-06	-5.46891	-0.20327	0.000165699	0.000762379	-3.11783	0.264054	8.63299e-07	8.56105e-06	5.06747	0.267873	5.92304e-07	6.40765e-06	5.1933	-0.250229	3.22212e-06	1.53373e-05	-4.81425	-0.239208	8.73894e-06	3.71405e-05	-4.43015	-0.0182328	0.737508	0.847688	-0.0717639	0.0575992	0.28942	0.530642	0.275198	-0.112518	0.0381553	0.11531	-0.938133	-0.0752583	0.166111	0.340814
5	ATF6	43.5206	-0.0287903	0.596615	0.692329	-0.159688	0.0936551	0.0846454	0.121359	0.915928	0.123283	0.0230481	0.0370638	1.43105	0.095581	0.07842	0.119994	0.920839	-0.114777	0.0344277	0.0602485	-1.22005	-0.123523	0.0227804	0.0404607	-1.39297	0.134067	0.0134074	0.0225329	1.64718	0.126015	0.0201623	0.0324231	1.48915	-0.00717246	0.895114	0.951059	-0.0217925	-0.0231841	0.669971	0.876117	-0.0574381	-0.00547827	0.919794	0.935517	-0.0289485	-0.0304338	0.575821	0.769918
6	BACH2	0.399243	-0.181428	0.000790704	0.0032947	-2.48218	-0.158669	0.00338297	0.0078936	-2.10272	-0.151246	0.00523416	0.0113248	-1.94597	-0.106209	0.0504158	0.0810741	-1.09112	0.132019	0.0149024	0.030914	1.50985	0.13571	0.0123047	0.024818	1.60523	-0.177376	0.00103754	0.00220445	-2.6567	-0.17333	0.00135323	0.0029279	-2.53344	-0.0497456	0.360297	0.612505	-0.212891	-0.0171947	0.751949	0.923933	-0.0343597	-0.0977854	0.0717559	0.174264	-0.758792	-0.0804462	0.13874	0.322385
7	BPTF	28.8686	-0.0938816	0.0838931	0.133938	-0.873096	0.155417	0.00410493	0.00921673	2.03542	0.179036	0.000928882	0.00257063	2.58996	0.121357	0.0252905	0.0485414	1.31389	-0.12268	0.0237307	0.0448246	-1.34848	-0.0884934	0.103309	0.148118	-0.829392	0.194016	0.000327879	0.00084821	3.0715	0.172161	0.00145971	0.00310189	2.50837	0.013382	0.805698	0.879616	0.055707	-0.0103245	0.849485	0.936006	-0.0287213	0.0395984	0.466569	0.645602	0.190035	0.00837113	0.877713	0.96711
8	CREB1	40.8804	0.0455872	0.401882	0.49303	0.307126	-0.136782	0.0116293	0.0230647	-1.63705	-0.141355	0.0091019	0.0169239	-1.7715	-0.0739088	0.173854	0.215506	-0.66654	0.131805	0.0150673	0.030914	1.50985	0.14006	0.00976285	0.0203821	1.69075	-0.142774	0.00842426	0.0151892	-1.81847	-0.132629	0.0144431	0.0252753	-1.5973	-0.0517063	0.341659	0.589238	-0.229709	0.0109926	0.839873	0.936006	0.0287213	-0.106703	0.0493484	0.133465	-0.874633	-0.0687252	0.206098	0.38954
9	CTCF	44.9679	0.158317	0.00345509	0.0108199	1.96578	0.0041074	0.93982	0.955886	0.019594	0.0291295	0.592296	0.623745	0.204993	0.0867052	0.110488	0.162322	0.789624	-0.0831892	0.125742	0.180281	-0.74405	-0.050144	0.356459	0.421089	-0.375626	0.034347	0.527733	0.581483	0.235463	0.0378844	0.486091	0.530687	0.275162	-0.015419	0.77685	0.863973	-0.0634998	-0.00155131	0.977254	0.992211	-0.00339591	0.0261609	0.630571	0.80686	0.0932019	0.0336671	0.53594	0.759248
10	DBP	5.01251	0.117479	0.030383	0.0634312	1.1977	0.279722	1.77448e-07	1.91967e-06	5.71677	0.30292	1.42399e-08	1.41213e-07	6.85013	0.277535	2.22581e-07	5.29743e-06	5.27593	-0.342084	1.19941e-10	7.13646e-09	-8.14652	-0.282858	1.27784e-07	1.90079e-06	-5.72107	0.32401	1.18321e-09	1.66441e-08	7.77874	0.316347	2.98706e-09	5.078e-08	7.29431	0.0848782	0.118222	0.319736	0.495208	0.0556382	0.306174	0.543802	0.264559	0.176698	0.00108516	0.0127288	1.89521	0.138336	0.0107086	0.0695939
11	E2F1..5	119.201	0.32626	8.97205e-10	2.66919e-08	7.57362	0.205682	0.000138007	0.00043218	3.36434	0.0868313	0.109969	0.145404	0.837425	0.115676	0.0330336	0.0583823	1.23372	-0.053057	0.329184	0.394271	-0.404206	-0.0798036	0.14193	0.196391	-0.706877	0.16555	0.00222057	0.00427815	2.36874	0.169162	0.00176891	0.00356781	2.4476	0.186342	0.000564429	0.0165432	1.78138	0.199058	0.000226897	0.00866921	2.06202	0.19403	0.00032754	0.00747558	2.12636	0.209452	0.000103263	0.0122883
12	EBF1	13.2556	-0.0237566	0.66232	0.736598	-0.132769	0.00915518	0.866362	0.888768	0.0512115	0.203046	0.000168516	0.000589807	3.22929	0.147645	0.00642593	0.015931	1.79776	-0.193405	0.000342612	0.00127409	-2.8948	-0.156995	0.00373879	0.00855609	-2.06772	0.128626	0.0177042	0.0270103	1.56847	0.116387	0.0319656	0.0481508	1.3174	-0.14402	0.00786639	0.0718809	-1.14339	-0.171628	0.00151079	0.0257077	-1.58994	-0.075146	0.166746	0.32443	-0.488879	-0.108986	0.0446634	0.183274
13	EGR1..3	76.6336	0.2009	0.000197913	0.00107053	2.9704	0.0482627	0.374807	0.455123	0.341871	0.0993217	0.0673905	0.0966201	1.01493	0.115041	0.0340135	0.0583823	1.23372	-0.0767687	0.157755	0.22005	-0.657479	-0.0528888	0.330721	0.40573	-0.391762	0.111882	0.0392641	0.0549697	1.25988	0.101235	0.0622623	0.0841957	1.07471	-0.035078	0.518982	0.744083	-0.128379	-0.014918	0.783918	0.924252	-0.0342097	-0.00720452	0.894648	0.933887	-0.0297055	0.00446798	0.934549	0.974962
14	EHF	0.00480004	0.103538	0.0565194	0.101906	0.991799	0.0293915	0.58897	0.673917	0.171393	-0.0346875	0.523648	0.56886	-0.244995	0.0124132	0.819514	0.833522	0.0790827	0.00511769	0.925057	0.933063	0.0300892	0.0366241	0.500722	0.551721	0.258281	0.0106271	0.845128	0.866985	0.0619883	0.0199456	0.713884	0.758502	0.120044	0.0896826	0.0987434	0.317979	0.497601	0.125447	0.020735	0.164498	0.78384	0.0421576	0.438247	0.62085	0.207013	0.062669	0.249003	0.435756
15	ELF1,2,4	65.8234	0.0132006	0.80828	0.851198	0.0699695	-0.22806	2.28959e-05	0.000113525	-3.94491	-0.329553	5.95904e-10	1.41825e-08	-7.84825	-0.242626	6.44445e-06	5.89915e-05	-4.22921	0.31714	2.71717e-09	6.78721e-08	7.16831	0.338277	1.96761e-10	2.34146e-08	7.63051	-0.301934	1.5922e-08	1.35337e-07	-6.86858	-0.285323	9.84427e-08	7.80979e-07	-6.10736	0.0402085	0.459728	0.692501	0.159579	0.114624	0.0346704	0.179575	0.745754	-0.103042	0.0577172	0.150959	-0.82114	-0.0521194	0.337812	0.566192
16	ELK1,4_GABP{A,B1}	147.006	0.0579555	0.286444	0.378742	0.421656	-0.199806	0.000214679	0.000655047	-3.18373	-0.285532	9.62836e-08	7.85912e-07	-6.10463	-0.199102	0.000226166	0.000961206	-3.01718	0.261792	1.07635e-06	9.14897e-06	5.03863	0.264739	8.07282e-07	8.00555e-06	5.09661	-0.262817	9.74245e-07	5.52072e-06	-5.258	-0.246978	4.34535e-06	2.32681e-05	-4.63324	0.0213073	0.695294	0.846819	0.0722096	0.0785457	0.148335	0.360242	0.443405	-0.0911888	0.0931929	0.21745	-0.66264	-0.040718	0.454056	0.692727
17	EP300	32.2328	0.225967	2.72941e-05	0.000191059	3.71883	0.275342	2.78839e-07	2.37013e-06	5.62523	0.267478	6.16009e-07	3.85816e-06	5.41362	0.240659	7.68303e-06	6.53057e-05	4.18505	-0.216846	5.7613e-05	0.00026369	-3.57891	-0.242386	6.58486e-06	5.59713e-05	-4.25203	0.306535	9.42151e-09	9.34299e-08	7.02951	0.293785	3.94693e-08	3.61296e-07	6.44214	0.0518599	0.340226	0.589238	0.229709	0.0421784	0.438021	0.659804	0.180585	0.155315	0.00412975	0.0258653	1.58728	0.133711	0.0136572	0.0738731
18	ESR1	1.01461	-0.14835	0.00617514	0.0170893	-1.76727	0.051209	0.346327	0.431528	0.364991	0.158455	0.00342663	0.00784171	2.10559	0.0741104	0.172681	0.215506	0.66654	-0.0842102	0.121153	0.17582	-0.754932	-0.101005	0.0628604	0.0997384	-1.00114	0.128641	0.0176904	0.0270103	1.56847	0.1082	0.0462328	0.0654964	1.18378	-0.111993	0.0390678	0.178811	-0.747607	-0.135579	0.0123896	0.105335	-0.977427	-0.0575559	0.289784	0.472387	-0.325702	-0.0937195	0.0844309	0.247206
19	ESRRA	17.4719	-0.00233963	0.9657	0.980481	-0.0085609	-0.226899	2.52452e-05	0.000115545	-3.93725	-0.285264	9.90645e-08	7.85912e-07	-6.10463	-0.216453	5.946e-05	0.000393097	-3.4055	0.210192	9.74909e-05	0.000411292	3.38585	0.217522	5.45691e-05	0.000270572	3.56772	-0.298443	2.35693e-08	1.86983e-07	-6.7282	-0.287256	8.01024e-08	6.80871e-07	-6.16694	0.0174808	0.74796	0.847688	0.0717639	0.0332525	0.540975	0.756159	0.121387	-0.0600854	0.26908	0.44473	-0.351904	-0.0221701	0.683608	0.856309
20	ETS1,2	250.969	-0.155317	0.00412938	0.012261	-1.91147	-0.208118	0.000114487	0.000387708	-3.4115	-0.0872908	0.108095	0.144531	-0.840038	-0.0758128	0.163006	0.213161	-0.671292	0.0849841	0.117762	0.173009	0.761932	0.149865	0.00566526	0.0124846	1.90363	-0.141867	0.008852	0.0157222	-1.80349	-0.141304	0.00912715	0.0172402	-1.76346	-0.131831	0.0150471	0.105329	-0.97745	-0.0870188	0.109201	0.309404	-0.509474	-0.173566	0.00133268	0.0127288	-1.89521	-0.162821	0.00262901	0.0347614
21	EWSR1-FLI1	354.376	-0.0271468	0.617743	0.706841	-0.150678	-0.232388	1.58402e-05	8.56813e-05	-4.06711	-0.250216	3.22576e-06	1.82793e-05	-4.73804	-0.192155	0.000374747	0.0014865	-2.82784	0.252001	2.73278e-06	1.91295e-05	4.7183	0.229725	1.98874e-05	0.000131478	3.88115	-0.276152	2.56633e-07	1.60733e-06	-5.79389	-0.264188	8.52116e-07	5.63344e-06	-5.24923	-0.0564808	0.298898	0.553423	-0.256943	0.001057	0.984501	0.992211	0.00339591	-0.146828	0.00672835	0.0348119	-1.45827	-0.111722	0.0395473	0.168076
22	FEV	0.000902696	-0.0548117	0.313424	0.401047	-0.396804	0.185324	0.000605652	0.00156908	2.80436	0.175637	0.00116383	0.00307767	2.51178	0.175077	0.00120746	0.0038596	2.41346	-0.154917	0.00422765	0.010481	-1.9796	-0.155792	0.00401518	0.00901522	-2.04502	0.216095	6.11877e-05	0.000182033	3.73985	0.211656	8.69575e-05	0.000265332	3.57621	0.0176136	0.746111	0.847688	0.0717639	0.0235087	0.665629	0.876117	0.0574381	0.0609357	0.262354	0.43972	0.356824	0.0304625	0.575461	0.769918
23	FOSL2	71.2021	-0.195583	0.000292711	0.00151446	-2.81974	-0.24637	4.59338e-06	3.21536e-05	-4.49277	-0.18857	0.000483105	0.00140218	-2.8532	-0.142656	0.00847866	0.020591	-1.68632	0.160877	0.00296054	0.00749583	2.12518	0.190809	0.000412453	0.00124745	2.90398	-0.242202	6.69423e-06	2.65538e-05	-4.57587	-0.235089	1.25413e-05	5.14628e-05	-4.28851	-0.135051	0.0127372	0.0947333	-1.0235	-0.0804472	0.138736	0.351267	-0.454362	-0.164536	0.00236505	0.0187627	-1.7267	-0.135307	0.0125675	0.0712157
24	FOS_FOS{B,L1}_JUN{B,D}	678.928	-0.232395	1.58299e-05	0.000144822	-3.83917	-0.219658	4.59098e-05	0.000176235	-3.75391	-0.136212	0.0119841	0.0209328	-1.67917	-0.0950779	0.0800094	0.120521	-0.918939	0.126679	0.0195104	0.0380612	1.41952	0.169571	0.00172346	0.00436365	2.36015	-0.189001	0.000468674	0.00109357	-2.96115	-0.188223	0.000495005	0.00128056	-2.8926	-0.161409	0.00286619	0.0379052	-1.4213	-0.100454	0.0643159	0.239175	-0.621285	-0.176596	0.0010925	0.0127288	-1.89521	-0.155355	0.00412003	0.0487906
25	FOXN1	0.00243998	0.231538	1.70379e-05	0.000144822	3.83917	0.0949423	0.0804421	0.118009	0.928085	0.0603425	0.267034	0.317771	0.497886	0.0801107	0.140399	0.196558	0.706509	-0.0765349	0.159027	0.22005	-0.657479	-0.0664396	0.221614	0.286653	-0.542643	0.0901214	0.0971	0.120364	0.919505	0.0953792	0.0790544	0.102931	0.987455	0.0895278	0.0993284	0.317979	0.497601	0.103069	0.0576518	0.23521	0.628544	0.0865049	0.111316	0.245307	0.61029	0.0963266	0.076112	0.236996
26	FOX{D1,D2}	48.6392	-0.0659667	0.224926	0.300744	-0.521802	0.0177519	0.744186	0.797821	0.0980944	0.105798	0.0513167	0.0753912	1.12268	0.057918	0.286756	0.337861	0.471261	-0.0661584	0.223579	0.286086	-0.543504	-0.0427548	0.431783	0.489354	-0.310377	0.0936325	0.0847208	0.107253	0.969591	0.0776523	0.153016	0.185805	0.730943	-0.0822015	0.130309	0.344595	-0.462691	-0.0733632	0.177059	0.390186	-0.408728	-0.0688537	0.205249	0.358311	-0.445739	-0.079181	0.145073	0.322385
27	GATA1..3	29.1471	-0.183964	0.000665133	0.00304426	-2.51652	-0.220462	4.30002e-05	0.000174548	-3.75808	-0.158473	0.00342287	0.00784171	-2.10559	-0.156983	0.00374144	0.0101189	-1.99487	0.149822	0.0056792	0.0134834	1.8702	0.183793	0.000672965	0.00195324	2.70924	-0.21782	5.32749e-05	0.000166835	-3.77771	-0.218669	4.97443e-05	0.000169131	-3.77178	-0.0982324	0.0704626	0.260949	-0.583444	-0.101618	0.0612732	0.23521	-0.628544	-0.150574	0.00544001	0.0301537	-1.52066	-0.143628	0.00803784	0.0637669
28	GFI1	0.00284658	0.353155	2.72805e-11	1.08213e-09	8.96572	0.132833	0.0142916	0.0278803	1.5547	0.0609696	0.262088	0.315035	0.501641	0.131607	0.015221	0.0329327	1.48237	-0.0617292	0.256182	0.317559	-0.498176	-0.0422306	0.437454	0.491104	-0.308826	0.117246	0.0307137	0.0445723	1.35093	0.126755	0.0194372	0.0316853	1.49914	0.144491	0.00766409	0.0718809	1.14339	0.171613	0.00151222	0.0257077	1.58994	0.128638	0.0176928	0.0726016	1.13905	0.151833	0.00505975	0.0487906
29	GLI1..3	64.4426	0.0246102	0.650974	0.7321	0.135429	0.113342	0.0367586	0.0616095	1.21035	0.133392	0.013885	0.0232721	1.63317	0.0853719	0.116091	0.168474	0.773467	-0.0625081	0.250222	0.316771	-0.499255	-0.0896842	0.0987376	0.14329	-0.843784	0.144489	0.00766486	0.0142519	1.84613	0.133012	0.0141603	0.0251503	1.59946	-0.0273648	0.614922	0.786891	-0.104085	-0.0734005	0.176839	0.390186	-0.408728	0.0312618	0.565476	0.739469	0.13108	0.012771	0.814404	0.914284
30	GTF2A1,2	193.212	0.0987786	0.0689082	0.120589	0.918691	0.0975729	0.0723775	0.107661	0.96794	0.16116	0.00291013	0.0069261	2.15951	0.109101	0.0444374	0.0733378	1.13467	-0.109831	0.0430272	0.072116	-1.14197	-0.116822	0.0313261	0.0525043	-1.27981	0.168251	0.00187414	0.00371704	2.4298	0.156208	0.00391764	0.00751934	2.12382	-0.0601981	0.268182	0.531895	-0.274174	-0.0820919	0.130824	0.338435	-0.470524	0.035582	0.512991	0.684551	0.164594	0.0260962	0.631417	0.8257
31	GTF2I	76.865	0.120535	0.0263031	0.0569104	1.24481	0.0828384	0.12735	0.176217	0.753953	0.14106	0.00924908	0.0169329	1.77127	0.119453	0.0276902	0.0514135	1.28892	-0.131856	0.0150275	0.030914	-1.50985	-0.0963632	0.076	0.115949	-0.935734	0.143009	0.00831638	0.0151892	1.81847	0.133238	0.013996	0.0251503	1.59946	-0.0301822	0.578982	0.782942	-0.106271	-0.0164382	0.762528	0.923933	-0.0343597	0.0189137	0.728086	0.875625	0.0576819	0.00299087	0.95616	0.974962
32	HAND1,2	2.47571	0.00263273	0.961406	0.980481	0.0085609	0.250262	3.21211e-06	2.38901e-05	4.62178	0.251049	2.98599e-06	1.77666e-05	4.7504	0.176268	0.00111644	0.00369045	2.43292	-0.202565	0.000174727	0.000670728	-3.17345	-0.225178	2.91532e-05	0.000173461	-3.7608	0.277254	2.29139e-07	1.51486e-06	5.81963	0.261917	1.06338e-06	6.66012e-06	5.17652	0.0562357	0.301003	0.553423	0.256943	-0.000531248	0.992211	0.992211	-0.00339591	0.11162	0.0397287	0.11531	0.938133	0.066218	0.223162	0.409385
33	HES1	9.05348	0.11325	0.0369117	0.0720081	1.14262	-0.0243	0.655088	0.72181	-0.141577	0.0217287	0.689578	0.713564	0.146567	0.0400323	0.461698	0.513477	0.289479	-0.0403282	0.458392	0.524506	-0.280249	-0.0693074	0.202274	0.264512	-0.577554	0.01595	0.769379	0.79614	0.0990106	0.0191649	0.724619	0.763095	0.117422	-0.0461526	0.396064	0.636222	-0.196392	-0.0570197	0.294306	0.530642	-0.275198	-0.017174	0.752238	0.87609	-0.0574514	-0.00601532	0.911961	0.974962
34	HIC1	90.7765	0.212604	8.07154e-05	0.000505533	3.29625	0.0981484	0.0707041	0.106504	0.972636	0.183076	0.000706822	0.00200266	2.69839	0.193827	0.000332362	0.00136383	2.86524	-0.221332	4.00507e-05	0.000207219	-3.68357	-0.213579	7.47418e-05	0.000342087	-3.46586	0.181173	0.000804437	0.00174051	2.75932	0.182308	0.00074483	0.0017727	2.75137	-0.019172	0.724522	0.847688	-0.0717639	-0.0435932	0.422801	0.646278	-0.189581	0.043254	0.426421	0.611375	0.213692	0.0367981	0.498688	0.73264
35	HIF1A	262.516	0.0943659	0.0823031	0.133938	0.873096	-0.192925	0.000354636	0.000981436	-3.00814	-0.218097	5.20969e-05	0.000206651	-3.68476	-0.135986	0.0121278	0.026726	-1.57307	0.188479	0.0004862	0.00165308	2.78171	0.193892	0.000330816	0.00115785	2.93635	-0.223552	3.33641e-05	0.000113438	-3.94524	-0.21208	8.41139e-05	0.000263409	-3.57937	-0.00748907	0.890513	0.951059	-0.0217925	0.0525102	0.334198	0.565888	0.247269	-0.0738011	0.174483	0.32443	-0.488879	-0.0319708	0.55669	0.769918
36	HMX1	0.000805655	0.0951405	0.0798103	0.132172	0.878861	-0.0502372	0.355566	0.436209	-0.360305	0.0445314	0.41288	0.47243	0.325663	0.0319659	0.55675	0.607828	0.216219	-0.0719176	0.185765	0.248243	-0.605123	-0.0465874	0.391626	0.452461	-0.344419	-0.0177095	0.744777	0.784322	-0.105505	-0.01089	0.841347	0.848478	-0.0713597	0.00465636	0.931796	0.979811	0.00885771	-0.0591545	0.276579	0.530642	-0.275198	0.0170909	0.753398	0.87609	0.0574514	0.0294073	0.588768	0.778483
37	HNF4A_NR2F1,2	207.186	-0.181201	0.000802909	0.0032947	-2.48218	-0.299648	2.0597e-08	3.25179e-07	-6.48788	-0.285714	9.44308e-08	7.85912e-07	-6.10463	-0.260196	1.25599e-06	1.86828e-05	-4.72856	0.219895	4.50327e-05	0.000223287	3.65114	0.223368	3.38749e-05	0.000191958	3.71679	-0.340284	1.51702e-10	3.00876e-09	-8.52161	-0.330815	5.0876e-10	1.00904e-08	-7.99609	-0.0807772	0.137119	0.354722	-0.450112	-0.0670618	0.21731	0.438303	-0.358226	-0.12332	0.0230065	0.0883151	-1.05397	-0.095821	0.077671	0.236996
38	HOX{A5,B5}	0.135187	0.133233	0.0139993	0.0333183	1.47732	-0.00195432	0.971346	0.971346	-0.0126258	0.000434769	0.993626	0.993626	0.00277704	0.0308722	0.570333	0.611438	0.213648	0.00906603	0.867652	0.897831	0.0468055	0.0245944	0.651184	0.685761	0.163827	-0.0058422	0.914485	0.922235	-0.0351585	-0.0109517	0.840461	0.848478	-0.0713597	0.0191515	0.724804	0.847688	0.0717639	0.0041877	0.938646	0.988486	0.00502956	0.0558476	0.304355	0.489436	0.310304	0.0687057	0.206227	0.38954
39	HSF1,2	110.742	-0.00735931	0.892398	0.923438	-0.0345921	-0.0510188	0.348123	0.431528	-0.364991	-0.198791	0.000231428	0.000764999	-3.11634	-0.185969	0.000579218	0.00215397	-2.66676	0.232724	1.53881e-05	8.71991e-05	4.05949	0.192095	0.000376345	0.00122546	2.9117	-0.165489	0.00222895	0.00427815	-2.36874	-0.157142	0.00370634	0.00723039	-2.14084	0.0858415	0.114093	0.319736	0.495208	0.0956421	0.0782289	0.265138	0.576527	0.00857996	0.874687	0.929355	0.0318183	0.0198772	0.714822	0.857655
40	IKZF1	0.000982315	0.0957343	0.077941	0.132172	0.878861	0.0382013	0.482449	0.562255	0.250067	-0.0248191	0.648211	0.676641	-0.169642	-0.0226709	0.676861	0.7128	-0.147032	0.145606	0.00720383	0.0161746	1.79117	0.0585524	0.281503	0.356371	0.448098	0.016436	0.762558	0.796004	0.0990848	0.0128593	0.813145	0.841429	0.0749828	0.0276127	0.611721	0.786891	0.104085	0.0483494	0.373949	0.597895	0.223375	-0.0110387	0.839211	0.912522	-0.0397568	0.0142909	0.792791	0.914284
41	IKZF2	2.83688	0.0864701	0.11146	0.170048	0.769428	0.345952	7.20187e-11	7.42623e-09	8.12923	0.382933	3.39607e-13	2.02066e-11	10.6945	0.319298	2.09735e-09	1.24792e-07	6.90381	-0.319324	2.09088e-09	6.78721e-08	-7.16831	-0.281076	1.54069e-07	2.03713e-06	-5.69098	0.412841	0	0	16	0.393987	5.03089e-14	5.98676e-12	11.2228	0.085516	0.115475	0.319736	0.495208	0.052139	0.337631	0.565888	0.247269	0.150148	0.00557464	0.0301537	1.52066	0.10326	0.0571866	0.206218
42	IRF1,2,7	62.2944	-0.0950904	0.0799696	0.132172	-0.878861	0.09467	0.081317	0.118009	0.928085	0.154968	0.00421507	0.00928877	2.03204	0.0790485	0.145749	0.19738	0.704697	-0.119119	0.0281308	0.0499636	-1.30135	-0.0775232	0.153702	0.210236	-0.677294	0.15165	0.00511354	0.00965891	2.01507	0.135774	0.0122638	0.0228029	1.64201	-0.0639098	0.239742	0.507789	-0.294316	-0.0843784	0.12041	0.333227	-0.47726	0.0107398	0.843508	0.912522	0.0397568	-0.0211391	0.697581	0.857655
43	JUN	584.279	0.00838823	0.877465	0.915951	0.0381279	-0.0211159	0.697897	0.761924	-0.118088	0.00580068	0.91509	0.922845	0.0348711	0.0262015	0.630041	0.669418	0.174303	-0.00831342	0.87855	0.901271	-0.0451447	0.00776691	0.886478	0.901631	0.044971	-0.0043483	0.936298	0.936298	-0.0285858	-0.00344121	0.949567	0.949567	-0.0224742	-0.0448261	0.409793	0.641649	-0.192702	-0.0182978	0.736606	0.922696	-0.0349412	-0.0464461	0.393066	0.592109	-0.227598	-0.0321738	0.554186	0.769918
44	KLF12	26.0498	-0.0403398	0.458263	0.556462	-0.254565	-0.0198455	0.715258	0.773779	-0.111383	-0.0637925	0.240606	0.295177	-0.529918	-0.078923	0.146391	0.19738	-0.704697	0.100921	0.0630802	0.102668	0.988566	0.0751869	0.166514	0.225173	0.647484	-0.0629135	0.247158	0.291304	-0.535654	-0.0730036	0.179196	0.213243	-0.671124	0.000496748	0.992717	0.992717	0.0031745	-0.0117888	0.828448	0.936006	-0.0287213	0.038111	0.483486	0.66132	0.179588	0.0376313	0.489011	0.727403
45	KLF4	13.6357	-0.0712975	0.189594	0.268592	-0.570908	-0.287599	7.72129e-08	9.18834e-07	-6.03676	-0.305016	1.12147e-08	1.36357e-07	-6.86532	-0.267831	5.94771e-07	1.01111e-05	-4.9952	0.287781	7.57206e-08	1.12634e-06	5.94833	0.285052	1.01326e-07	1.72255e-06	5.76383	-0.323505	1.2588e-09	1.66441e-08	-7.77874	-0.313648	4.11372e-09	5.43925e-08	-7.26446	-0.0881509	0.104655	0.319332	-0.495758	-0.0618562	0.255203	0.505781	-0.296038	-0.141047	0.00925536	0.0440555	-1.356	-0.0964194	0.0758286	0.236996
46	LEF1_TCF7_TCF7L1,2	83.2642	0.118348	0.0291703	0.0619868	1.2077	0.274047	3.18261e-07	2.52487e-06	5.59776	0.304809	1.14837e-08	1.36357e-07	6.86532	0.22271	3.57645e-05	0.000250351	3.60145	-0.203507	0.00016276	0.000645614	-3.19003	-0.226061	2.70811e-05	0.000169613	-3.77054	0.327095	8.0912e-10	1.3755e-08	7.86154	0.314834	3.57529e-09	5.31824e-08	7.27423	0.0745314	0.170249	0.405193	0.392338	0.0259652	0.633131	0.846546	0.0723494	0.116853	0.0312821	0.103405	0.98546	0.0858253	0.114161	0.301894
47	LMO2	0.0757662	-0.109001	0.0446334	0.0843075	-1.07413	-0.141823	0.00887323	0.0182054	-1.7398	-0.0957514	0.0778877	0.107775	-0.967483	-0.0688278	0.205421	0.249439	-0.603035	0.0280704	0.60583	0.661411	0.179529	0.0161673	0.766326	0.786145	0.104497	-0.118863	0.0284719	0.0418291	-1.37852	-0.109211	0.0442237	0.0641784	-1.19261	-0.0456745	0.40098	0.636222	-0.196392	-0.0387714	0.475935	0.707429	-0.150317	-0.0713192	0.189459	0.346856	-0.459851	-0.0711338	0.190614	0.384082
48	MAFB	5.05476	0.107348	0.0479845	0.0892212	1.04953	0.230295	1.89456e-05	9.80231e-05	4.00867	0.205505	0.000139879	0.000504412	3.29721	0.179474	0.000901993	0.00306678	2.51332	-0.167217	0.00200038	0.00557176	-2.25401	-0.24114	7.36079e-06	5.83956e-05	-4.23362	0.238587	9.23183e-06	3.54383e-05	4.45053	0.228992	2.11615e-05	7.86942e-05	4.10406	0.0475577	0.38183	0.622435	0.205906	0.00113577	0.983346	0.992211	0.00339591	0.15955	0.0032082	0.0212098	1.67346	0.135372	0.0125251	0.0712157
49	MAZ	112.552	0.0690113	0.204213	0.280301	0.552376	-0.0803202	0.139362	0.190621	-0.719829	-0.0167829	0.757702	0.775837	-0.110229	-0.0313778	0.564034	0.610182	-0.214541	0.0247501	0.649123	0.692283	0.159716	0.0500466	0.357395	0.421089	0.375626	-0.0319302	0.557191	0.60278	-0.219841	-0.0380987	0.483626	0.530687	-0.275162	-0.0975775	0.072364	0.260949	-0.583444	-0.0920797	0.090029	0.28058	-0.551944	-0.078074	0.150793	0.300297	-0.522449	-0.0706224	0.193828	0.384082
50	MEF2{A,B,C,D}	171.582	0.0845683	0.119575	0.178478	0.748416	0.183071	0.000707072	0.00179025	2.74709	0.211818	8.58612e-05	0.000319296	3.49581	0.166978	0.00203071	0.005894	2.22959	-0.181227	0.000801517	0.00264946	-2.57684	-0.18082	0.000823895	0.00233437	-2.63183	0.244318	5.53382e-06	2.27077e-05	4.64383	0.229747	1.98487e-05	7.61934e-05	4.11808	-0.0287549	0.597067	0.786891	-0.104085	-0.0315473	0.56193	0.759883	-0.119253	0.0684745	0.20776	0.358311	0.445739	0.0464598	0.392926	0.626533
51	MTF1	15.5105	0.163162	0.00257446	0.00851003	2.07007	0.0281833	0.60438	0.684964	0.164332	0.111748	0.0395012	0.0602647	1.21994	0.129924	0.0165821	0.035237	1.453	-0.144679	0.00758481	0.0167147	-1.7769	-0.144061	0.00784838	0.0168223	-1.77411	0.0958561	0.0775619	0.100325	0.998592	0.102463	0.0591407	0.0808936	1.09209	-0.0486529	0.370955	0.613106	-0.212465	-0.0570527	0.294026	0.530642	-0.275198	0.000763898	0.988799	0.988799	0.00489183	0.00313528	0.954046	0.974962
52	MYB	1.46155	0.245308	5.05902e-06	6.68915e-05	4.17463	0.0528503	0.331074	0.419125	0.377656	-0.0308793	0.570245	0.605885	-0.21761	0.0147684	0.786033	0.820508	0.0859173	0.024566	0.651561	0.692283	0.159716	0.0221308	0.68414	0.707936	0.150006	0.0101038	0.852666	0.867241	0.0618602	0.0201203	0.71149	0.758502	0.120044	0.119284	0.0279122	0.159376	0.797578	0.14443	0.00769016	0.0915129	1.03852	0.118222	0.0293439	0.102704	0.988414	0.142063	0.00875776	0.0651358
53	MYFfamily	0.0506243	0.0570368	0.294161	0.384672	0.41491	0.208934	0.000107499	0.000376246	3.42453	0.357384	1.5224e-11	6.03886e-10	9.21905	0.288412	7.07528e-08	2.1049e-06	5.67677	-0.309893	6.38852e-09	1.26706e-07	-6.8972	-0.305667	1.04089e-08	2.47731e-07	-6.60602	0.322109	1.49237e-09	1.77592e-08	7.75058	0.303312	1.36194e-08	1.62071e-07	6.7903	-0.0674624	0.214571	0.47285	-0.325276	-0.0902371	0.0966703	0.28058	-0.551944	0.0230956	0.671158	0.849416	0.0708794	-0.0204225	0.707353	0.857655
54	MYOD1	0.00359904	-0.250967	3.00894e-06	4.4758e-05	-4.34913	-0.339104	1.76809e-10	7.42623e-09	-8.12923	-0.28401	1.13148e-07	8.41535e-07	-6.07493	-0.251691	2.81289e-06	3.34734e-05	-4.4753	0.261907	1.06439e-06	9.14897e-06	5.03863	0.230963	1.78964e-05	0.000125275	3.90214	-0.346516	6.6817e-11	1.59025e-09	-8.79854	-0.3333	3.71852e-10	8.85008e-09	-8.05305	-0.161406	0.00286678	0.0379052	-1.4213	-0.119452	0.027691	0.164931	-0.782699	-0.217381	5.51893e-05	0.00656753	-2.1826	-0.191702	0.000387059	0.0139872
55	MZF1	12.8901	0.182285	0.000746007	0.00328796	2.48307	0.214631	6.87601e-05	0.000255701	3.59227	0.271771	4.00848e-07	2.80594e-06	5.55192	0.237676	1.00036e-05	7.93619e-05	4.10039	-0.24472	5.33585e-06	3.47425e-05	-4.45914	-0.193192	0.0003479	0.00118286	-2.92707	0.283251	1.226e-07	8.58203e-07	6.06641	0.268291	5.6818e-07	3.97726e-06	5.40042	-0.0006491	0.990483	0.992717	-0.0031745	0.00165664	0.97571	0.992211	0.00339591	0.0818843	0.131803	0.280081	0.552716	0.0582376	0.284101	0.489972
56	NANOG{mouse}	0.0549309	-0.091989	0.090347	0.141464	-0.849353	0.0658864	0.225492	0.298151	0.525564	0.0164189	0.762798	0.775837	0.110229	-0.0422855	0.436858	0.495105	-0.305302	0.0365142	0.502008	0.567994	0.245656	0.0313723	0.564102	0.610256	0.214488	0.0330702	0.543197	0.593031	0.226922	0.0227948	0.675194	0.730438	0.136417	0.0327426	0.5472	0.758951	0.119786	-0.00881506	0.871283	0.946166	-0.0240325	0.0376017	0.489353	0.661738	0.179314	0.0232519	0.669064	0.853521
57	NFATC1..3	44.8635	0.0382798	0.481549	0.573044	0.241812	0.120018	0.0269583	0.0478812	1.31984	0.321767	1.55579e-09	3.08565e-08	7.51065	0.269003	5.29243e-07	1.01111e-05	4.9952	-0.267429	6.1904e-07	6.69689e-06	-5.17413	-0.1947	0.000312067	0.00112533	-2.94872	0.267024	6.44375e-07	3.83403e-06	5.41634	0.242858	6.31174e-06	3.02605e-05	4.51912	-0.114066	0.0355668	0.178811	-0.747607	-0.122289	0.0241822	0.164931	-0.782699	-0.0183592	0.735756	0.875625	-0.0576819	-0.0631917	0.245072	0.435277
58	NFE2	0.46431	-0.102059	0.0601537	0.10684	-0.971265	-0.128409	0.0178973	0.0338061	-1.47101	-0.0709806	0.191573	0.245131	-0.610601	-0.0679262	0.21143	0.251602	-0.599286	0.0755603	0.164414	0.224094	0.649569	0.0904291	0.0959603	0.140979	0.850846	-0.0995654	0.0667186	0.0872475	-1.05925	-0.095214	0.0795767	0.102931	-0.987455	-0.109653	0.0433682	0.191142	-0.718645	-0.0672917	0.215735	0.438303	-0.358226	-0.141834	0.00886792	0.0439701	-1.35684	-0.132788	0.0143249	0.0741159
59	NFE2L1	208.2	-0.172317	0.00144507	0.00521102	-2.28308	-0.0995761	0.0666893	0.101744	-0.992491	-0.0727896	0.180477	0.233443	-0.631819	-0.0788562	0.146734	0.19738	-0.704697	0.0573229	0.291743	0.356025	0.44852	0.0501199	0.35669	0.421089	0.375626	-0.107338	0.0480068	0.0649183	-1.18763	-0.110864	0.0410944	0.0603733	-1.21915	-0.0700796	0.197283	0.442956	-0.353639	-0.095015	0.08021	0.265138	-0.576527	-0.0698356	0.19885	0.354781	-0.45004	-0.0790818	0.145579	0.322385
60	NFE2L2	87.1081	-0.21699	5.69531e-05	0.000376524	-3.42421	-0.244964	5.21924e-06	3.4505e-05	-4.46212	-0.199591	0.000218122	0.000741614	-3.12982	-0.190034	0.000435736	0.00167266	-2.77659	0.166368	0.0021099	0.00570633	2.24364	0.202257	0.000178812	0.000709287	3.14918	-0.249771	3.3614e-06	1.53849e-05	-4.81291	-0.239455	8.55019e-06	3.71405e-05	-4.43015	-0.0889493	0.10154	0.317979	-0.497601	-0.0741314	0.172558	0.390186	-0.408728	-0.154315	0.00437961	0.0260587	-1.58405	-0.137642	0.0111116	0.0695939
61	NFIX	133.894	0.0774847	0.153906	0.223352	0.65101	0.0697544	0.199374	0.266579	0.574175	0.141786	0.00889125	0.0167946	1.77483	0.114465	0.0349232	0.0585333	1.2326	-0.112267	0.0385886	0.0665513	-1.17684	-0.134277	0.0132619	0.0263028	-1.58	0.135825	0.012231	0.0214042	1.6695	0.127863	0.0183941	0.0312699	1.50487	-0.0284538	0.600914	0.786891	-0.104085	-0.0454355	0.403452	0.63172	-0.199475	0.0126492	0.816143	0.907673	0.0420707	0.00561291	0.917829	0.974962
62	NFKB1_REL_RELA	149.495	-0.176689	0.0010858	0.00416806	-2.38007	-0.0471327	0.386102	0.464102	-0.333386	-0.0915179	0.0920139	0.125858	-0.900119	-0.138767	0.0104647	0.0244177	-1.6123	0.170983	0.00157471	0.00457049	2.34004	0.0817222	0.132571	0.187809	0.726283	-0.0765159	0.159131	0.19323	-0.713925	-0.0820953	0.130808	0.162147	-0.79009	-0.0212362	0.696261	0.846819	-0.0722096	0.00427807	0.937325	0.988486	0.00502956	-0.0623722	0.251255	0.427133	-0.369437	-0.065237	0.230106	0.414888
63	NFY{A,B,C}	83.6651	0.185912	0.000581539	0.00288347	2.54009	-0.103638	0.05628	0.0892976	-1.04916	-0.150312	0.00552248	0.0117353	-1.93051	-0.0750022	0.16756	0.214454	-0.668666	0.102688	0.0585834	0.0968253	1.01401	0.121416	0.0252188	0.0434933	1.36158	-0.133136	0.0140699	0.0229359	-1.63948	-0.115229	0.0337217	0.050161	-1.29963	0.0352825	0.516547	0.744083	0.128379	0.0709842	0.19155	0.411622	0.385501	0.00548773	0.919655	0.935517	0.0289485	0.0504768	0.353273	0.583882
64	NHLH1,2	0.00390885	0.0474463	0.382947	0.479328	0.319368	0.00291148	0.957323	0.965436	0.0152766	0.127626	0.018613	0.0307631	1.51197	0.1413	0.00912942	0.021728	1.66298	-0.171844	0.00148993	0.00451551	-2.34529	-0.143905	0.00791638	0.0168223	-1.77411	0.0911121	0.0934692	0.117082	0.931508	0.0889343	0.101597	0.127264	0.895294	-0.0560864	0.30229	0.553423	-0.256943	-0.0435172	0.423611	0.646278	-0.189581	-0.0183546	0.735819	0.875625	-0.0576819	-0.0304701	0.575366	0.769918
65	NKX3-2	0.0516929	0.14719	0.00659288	0.0178308	1.74883	0.129222	0.017181	0.0329764	1.4818	0.0673739	0.215174	0.266726	0.573935	0.0811964	0.135087	0.193679	0.712917	-0.0475971	0.381435	0.449414	-0.347353	-0.0231942	0.669836	0.699215	-0.155389	0.102127	0.0599822	0.0793098	1.10067	0.0907094	0.0949317	0.12018	0.92017	0.0987065	0.0691117	0.260949	0.583444	0.102015	0.0602654	0.23521	0.628544	0.131797	0.0150734	0.06899	1.16121	0.123594	0.0227017	0.103904
66	NR1H4	0.00578605	0.00189326	0.972241	0.980481	0.0085609	0.0141498	0.794791	0.836992	0.0772787	0.0391383	0.471767	0.529625	0.276032	0.000161206	0.997638	0.997638	0.00102701	0.022506	0.67908	0.715137	0.145611	0.0254321	0.640126	0.680134	0.167405	0.0298549	0.583106	0.625132	0.204028	0.0110655	0.838824	0.848478	0.0713597	-0.0533254	0.326741	0.585046	-0.23281	-0.0582776	0.28377	0.530642	-0.275198	-0.00633987	0.907232	0.935517	-0.0289485	-0.0103117	0.849669	0.944959
67	NR5A1,2	0.0698564	0.0970758	0.0738485	0.127362	0.89496	0.103869	0.0557307	0.0892976	1.04916	0.031471	0.562877	0.603445	0.219362	0.0141135	0.795306	0.822969	0.0846167	0.00456965	0.933063	0.933063	0.0300892	-0.057805	0.287699	0.36038	-0.443239	0.0629025	0.247241	0.291304	0.535654	0.058542	0.281589	0.325331	0.487675	0.077899	0.151712	0.384122	0.41553	0.0370729	0.495485	0.707429	0.150317	0.0797987	0.141954	0.291911	0.53475	0.0701422	0.196882	0.384082
68	NRF1	8.62754	0.12546	0.0207213	0.0456636	1.34043	-0.170079	0.00166857	0.00405224	-2.3923	-0.241585	7.07459e-06	3.4757e-05	-4.45896	-0.158962	0.00332386	0.00919859	-2.03628	0.189914	0.000439448	0.00153807	2.81302	0.197958	0.00024607	0.000915074	3.03854	-0.223183	3.43947e-05	0.000113694	-3.94426	-0.205894	0.000135785	0.000394108	-3.40439	0.0175025	0.747658	0.847688	0.0717639	0.0524311	0.334928	0.565888	0.247269	-0.0491194	0.366381	0.573675	-0.241334	-0.00226666	0.966769	0.974962
69	PATZ1	7.59905	0.0219045	0.687198	0.750244	0.124798	-0.107549	0.0475676	0.0775416	-1.11047	-0.0374209	0.491444	0.546559	-0.262363	-0.0326693	0.548098	0.603923	-0.219019	0.0361789	0.505944	0.567994	0.245656	0.0389649	0.473734	0.526863	0.278302	-0.0564286	0.299345	0.336058	-0.473586	-0.0564696	0.298995	0.342119	-0.465823	-0.117532	0.0303073	0.163935	-0.785329	-0.113668	0.0362168	0.179575	-0.745754	-0.102782	0.058354	0.150959	-0.82114	-0.096329	0.0761045	0.236996
70	PAX2	0.00425009	-0.299595	2.072e-08	4.93137e-07	-6.30703	-0.275752	2.67389e-07	2.37013e-06	-5.62523	-0.125361	0.020823	0.0339443	-1.46923	-0.137758	0.011043	0.0252714	-1.59737	0.0891951	0.100596	0.15153	0.819501	0.123742	0.0225395	0.0404607	1.39297	-0.222312	3.6954e-05	0.000118852	-3.92499	-0.216116	6.10832e-05	0.000201914	-3.69483	-0.214168	7.1333e-05	0.00486336	-2.31306	-0.191997	0.000378997	0.00902013	-2.04479	-0.197117	0.000261721	0.00747558	-2.12636	-0.19234	0.000369814	0.0139872
71	PAX5	0.00367193	0.138119	0.0108328	0.0274276	1.56181	-0.0114841	0.832816	0.861783	-0.0646021	0.080307	0.139427	0.182327	0.739149	0.0974538	0.0727277	0.113876	0.943567	-0.123152	0.023195	0.0445194	-1.35145	-0.120978	0.0257528	0.0437798	-1.35873	0.0586177	0.280966	0.320337	0.494393	0.064165	0.237867	0.280259	0.552441	-0.0609305	0.262395	0.529236	-0.27635	-0.0740511	0.173025	0.390186	-0.408728	-0.0186865	0.731225	0.875625	-0.0576819	-0.0137499	0.800467	0.914284
72	PITX1..3	90.9572	-0.154221	0.00440379	0.0124774	-1.90388	-0.291449	5.09445e-08	6.73599e-07	-6.1716	-0.345707	7.44021e-11	2.21346e-09	-8.65493	-0.303996	1.25996e-08	4.99785e-07	-6.30122	0.316735	2.85177e-09	6.78721e-08	7.16831	0.303594	1.31894e-08	2.6159e-07	6.58238	-0.371093	2.12252e-12	8.41932e-11	-10.0747	-0.361447	8.60555e-12	3.41354e-10	-9.4668	-0.0760299	0.161802	0.392948	-0.405665	-0.0511812	0.346589	0.572835	-0.24197	-0.120411	0.0264589	0.0983939	-1.00703	-0.0910422	0.0937218	0.265545
73	POU2F1..3	24.6605	0.184592	0.000637046	0.00303234	2.51822	0.108846	0.0449404	0.0742765	1.12915	0.102398	0.0593034	0.0860622	1.06519	0.121429	0.0252029	0.0485414	1.31389	-0.0819093	0.131684	0.186553	-0.729198	-0.0517591	0.341165	0.414272	-0.382714	0.133229	0.0140026	0.0229359	1.63948	0.135336	0.0125486	0.0229736	1.63877	0.108141	0.0463529	0.197	0.705535	0.119431	0.0277194	0.164931	0.782699	0.0984189	0.0699286	0.173365	0.76104	0.105809	0.0512924	0.190744
74	POU5F1	0.901279	-0.047075	0.386684	0.479328	-0.319368	0.100798	0.0634028	0.0979861	1.00884	0.24361	5.89864e-06	3.05191e-05	4.51543	0.170512	0.00162301	0.00495227	2.3052	-0.218487	5.04793e-05	0.000240282	-3.61928	-0.200991	0.000196566	0.000754561	-3.12231	0.214048	7.20164e-05	0.000208233	3.68145	0.20073	0.000200428	0.000530021	3.27571	-0.0906587	0.0951171	0.317979	-0.497601	-0.117506	0.030344	0.17195	-0.764599	-0.0225784	0.678106	0.849416	-0.0708794	-0.0521466	0.33756	0.566192
75	PPARG	17.0434	-0.354736	2.19613e-11	1.08213e-09	-8.96572	-0.299116	2.18607e-08	3.25179e-07	-6.48788	-0.169638	0.00171617	0.00434519	-2.36199	-0.2032	0.00016657	0.000762379	-3.11783	0.149518	0.00577858	0.0134834	1.8702	0.166758	0.00205897	0.00490034	2.30977	-0.255581	1.95195e-06	1.00992e-05	-4.99571	-0.257779	1.58384e-06	9.42386e-06	-5.02577	-0.207371	0.00012127	0.00486336	-2.31306	-0.195645	0.000291402	0.00866921	-2.06202	-0.192074	0.00037692	0.00747558	-2.12636	-0.185759	0.000587697	0.0139872
76	RBPJ	76.7103	0.13602	0.0121058	0.0295929	1.52881	0.125595	0.0205844	0.0382741	1.4171	0.149084	0.00592318	0.0121527	1.91533	0.122318	0.0241488	0.047895	1.31971	-0.130562	0.0160541	0.0318406	-1.49702	-0.165768	0.0021905	0.00511116	-2.29148	0.170166	0.00165935	0.00340453	2.46794	0.169514	0.00172977	0.00354901	2.44989	-0.00163557	0.976019	0.992703	-0.00318077	-0.0139691	0.797355	0.930247	-0.0314017	0.045411	0.403705	0.592109	0.227598	0.038379	0.480413	0.72366
77	RFX1..5_RFXANK_RFXAP	99.9456	0.11682	0.0313297	0.0639874	1.19391	0.0799208	0.141344	0.191136	0.718659	0.0981506	0.0706979	0.0993642	1.00277	0.108821	0.0449887	0.0733378	1.13467	-0.146068	0.0070208	0.0160668	-1.79407	-0.113708	0.0361505	0.0597487	-1.22367	0.104744	0.0536911	0.0717893	1.14394	0.108863	0.0449066	0.0643842	1.19122	0.0418016	0.442127	0.682657	0.165797	0.0374402	0.491221	0.707429	0.150317	0.073875	0.174051	0.32443	0.488879	0.0758995	0.162524	0.339305
78	RREB1	38.1848	0.0395426	0.467199	0.561582	0.250586	-0.121093	0.0256126	0.0468908	-1.32891	-0.0483921	0.373526	0.437576	-0.358947	-0.0407351	0.453866	0.509529	-0.292831	0.0617652	0.255904	0.317559	0.498176	0.0805778	0.138094	0.193332	0.713697	-0.0691102	0.203564	0.244688	-0.611388	-0.0759227	0.162395	0.195203	-0.709515	-0.13508	0.0127175	0.0947333	-1.0235	-0.113886	0.0358601	0.179575	-0.745754	-0.119696	0.027373	0.0987087	-1.00564	-0.105841	0.051223	0.190744
79	RUNX1..3	167.684	-0.135896	0.0121853	0.0295929	-1.52881	0.0124923	0.818384	0.854278	0.0684009	0.0900142	0.0974994	0.131846	0.879934	0.078684	0.14762	0.19738	0.704697	-0.111525	0.0398988	0.0678279	-1.16859	-0.0985441	0.0695721	0.107765	-0.967523	0.0584132	0.28265	0.320337	0.494393	0.0467947	0.38952	0.433205	0.363307	-0.0491157	0.366417	0.613106	-0.212465	-0.0532228	0.327673	0.565888	-0.247269	0.0128525	0.813241	0.907673	0.0420707	-0.0180402	0.740181	0.863545
80	RXRA_VDR{dimer}	23.3193	-0.230196	1.91054e-05	0.000151569	-3.81939	-0.114892	0.0342469	0.0582198	-1.23493	-0.164159	0.00242084	0.00587918	-2.23068	-0.20468	0.000148937	0.000740246	-3.13062	0.209836	0.000100231	0.000411292	3.38585	0.167853	0.00192184	0.00466734	2.33093	-0.169084	0.00177772	0.00358557	-2.44544	-0.176549	0.00109595	0.00246071	-2.60894	-0.0530338	0.329396	0.585046	-0.23281	-0.0683713	0.208447	0.43518	-0.361331	-0.0745909	0.169907	0.32443	-0.488879	-0.0773082	0.154848	0.329053
81	RXR{A,B,G}	64.8445	0.019894	0.714592	0.773058	0.111788	0.195852	0.000287035	0.000853929	3.06858	0.155119	0.00417769	0.00928877	2.03204	0.174764	0.00123248	0.0038596	2.41346	-0.153567	0.00457537	0.0111116	-1.95422	-0.174364	0.00126511	0.00327279	-2.48508	0.185919	0.00058122	0.001305	2.88439	0.186055	0.000575795	0.00145786	2.83628	0.103164	0.0574203	0.235621	0.627786	0.101739	0.0609658	0.23521	0.628544	0.129676	0.0167914	0.0713635	1.14652	0.108132	0.0463715	0.18394
82	SMAD1..7,9	344.314	0.127061	0.0191438	0.043327	1.36324	0.194381	0.000319357	0.000926913	3.03296	0.191259	0.000399486	0.00121894	2.91402	0.153242	0.00466282	0.0120625	1.91856	-0.13105	0.0156602	0.0315858	-1.50051	-0.17813	0.0009868	0.00266885	-2.57368	0.213474	7.53613e-05	0.000208558	3.68077	0.206546	0.000129188	0.000384335	3.41529	0.0396571	0.46591	0.69304	0.159241	0.0219173	0.687025	0.888651	0.0512686	0.0986952	0.0691436	0.173365	0.76104	0.0812385	0.134884	0.322385
83	SNAI1..3	187.902	-0.112388	0.0383798	0.0736645	-1.13274	-0.101318	0.0620472	0.0971528	-1.01254	-0.0980547	0.0709745	0.0993642	-1.00277	-0.101004	0.0628635	0.0997435	-1.00112	0.0995672	0.0667136	0.105852	0.9753	0.0925694	0.0883269	0.133049	0.875987	-0.129558	0.0168922	0.0270052	-1.56855	-0.127292	0.0189252	0.0313462	-1.50381	-0.0143434	0.792047	0.872719	-0.0591258	-0.0367404	0.499362	0.707429	-0.150317	-0.0128077	0.813881	0.907673	-0.0420707	-0.024801	0.648449	0.838755
84	SOX17	0.000861976	0.271267	4.21761e-07	7.16993e-06	5.14448	0.238988	8.9112e-06	5.30217e-05	4.27555	0.192598	0.000363063	0.00113696	2.94425	0.213488	7.52832e-05	0.000441653	3.35492	-0.167115	0.00201333	0.00557176	-2.25401	-0.174486	0.00125506	0.00327279	-2.48508	0.246013	4.74517e-06	2.0167e-05	4.69536	0.250434	3.16135e-06	1.79143e-05	4.7468	0.119224	0.0279916	0.159376	0.797578	0.122102	0.0244016	0.164931	0.782699	0.131007	0.0156946	0.0691726	1.16007	0.127622	0.0186164	0.0913238
85	SOX2	0.0284491	0.0245235	0.652123	0.7321	0.135429	0.225574	2.82052e-05	0.000119872	3.92128	0.308635	7.39302e-09	1.09971e-07	6.95872	0.246603	4.49682e-06	4.69909e-05	4.32799	-0.282711	1.29776e-07	1.54433e-06	-5.81126	-0.235827	1.17615e-05	8.7476e-05	-4.05811	0.308298	7.68787e-09	8.31688e-08	7.08004	0.295097	3.41631e-08	3.45009e-07	6.46217	-0.00307758	0.954891	0.979811	-0.00885771	-0.00858546	0.874608	0.946166	-0.0240325	0.0887722	0.102224	0.23047	0.637386	0.0499105	0.358706	0.584739
86	SOX{8,9,10}	7.10127	0.0831571	0.125889	0.184947	0.732952	-0.117972	0.0296904	0.0512051	-1.29069	-0.12134	0.0253105	0.0396309	-1.40197	-0.0684993	0.207596	0.249534	-0.602869	0.0709714	0.191631	0.250594	0.601029	0.0720742	0.184807	0.244355	0.611978	-0.134761	0.0129315	0.0223021	-1.65165	-0.120653	0.0261557	0.0412619	-1.38445	-0.0273614	0.614965	0.786891	-0.104085	0.0160019	0.76865	0.923933	0.0343597	-0.0351833	0.517727	0.684551	-0.164594	-0.00487802	0.928557	0.974962
87	SP1	15.6779	0.0189069	0.728179	0.78066	0.107538	-0.167942	0.00191106	0.00454832	-2.34215	-0.110879	0.041067	0.0618604	-1.20859	-0.0701941	0.196551	0.241129	-0.61775	0.0715955	0.187747	0.248243	0.605123	0.090736	0.0948347	0.140979	0.850846	-0.129408	0.0170201	0.0270052	-1.56855	-0.11993	0.0270715	0.0418377	-1.37843	-0.0892521	0.100377	0.317979	-0.497601	-0.070642	0.193705	0.411622	-0.385501	-0.115613	0.0331296	0.106552	-0.972439	-0.0882067	0.104434	0.282448
88	SPI1	0.154794	-0.139987	0.00980148	0.0259195	-1.58637	-0.338662	1.87216e-10	7.42623e-09	-8.12923	-0.303992	1.26045e-08	1.36357e-07	-6.86532	-0.252702	2.55948e-06	3.34734e-05	-4.4753	0.282754	1.29185e-07	1.54433e-06	5.81126	0.319299	2.09704e-09	6.2387e-08	7.20491	-0.35925	1.17296e-11	3.48955e-10	-9.45723	-0.350122	4.11961e-11	1.22558e-09	-8.91166	-0.112787	0.0376933	0.178811	-0.747607	-0.0480593	0.376825	0.597895	-0.223375	-0.171765	0.00149751	0.0127288	-1.89521	-0.127017	0.0191857	0.0913238
89	SPIB	0.00114368	-0.228309	2.24201e-05	0.00016675	-3.77793	-0.175283	0.00119125	0.0029533	-2.52969	-0.177725	0.00101375	0.00274172	-2.56198	-0.160644	0.00300272	0.00850771	-2.07019	0.135497	0.012443	0.0269222	1.56989	0.190577	0.00041931	0.00124745	2.90398	-0.20983	0.000100281	0.000267957	-3.57193	-0.202195	0.000179649	0.00048587	-3.31348	-0.0345088	0.525789	0.744868	-0.127921	-0.0105682	0.845976	0.936006	-0.0287213	-0.0886635	0.102646	0.23047	-0.637386	-0.0842743	0.120869	0.312684
90	SPZ1	0.000501411	-0.0564592	0.299084	0.386858	-0.412448	0.0436231	0.422482	0.502754	0.298645	0.14935	0.00583433	0.0121527	1.91533	0.120038	0.0269325	0.0508725	1.29352	-0.121807	0.0247506	0.0460206	-1.33705	-0.104522	0.0542025	0.0871635	-1.05967	0.114614	0.0346859	0.0497304	1.30338	0.0968127	0.0746373	0.0986871	1.00574	-0.119963	0.0270283	0.159376	-0.797578	-0.137191	0.0113801	0.105335	-0.977427	-0.0511235	0.347134	0.550786	-0.259017	-0.0783625	0.149286	0.323
91	SREBF1,2	263.131	-0.243599	5.90481e-06	7.02673e-05	-4.15325	-0.276621	2.44568e-07	2.37013e-06	-5.62523	-0.122281	0.0241922	0.0383849	-1.41584	-0.114831	0.0343425	0.0583823	-1.23372	0.0528235	0.33132	0.394271	0.404206	0.122166	0.0243264	0.0425711	1.37088	-0.209696	0.000101328	0.000267957	-3.57193	-0.203085	0.000168025	0.000464999	-3.33255	-0.18142	0.000791112	0.0165432	-1.78138	-0.153511	0.0045903	0.060694	-1.21685	-0.200904	0.000197846	0.00747558	-2.12636	-0.188739	0.000477408	0.0139872
92	SRF	28.7089	0.204036	0.000156384	0.000886178	3.05248	0.238342	9.43336e-06	5.34557e-05	4.27201	0.147146	0.00660909	0.0128931	1.88964	0.119155	0.028083	0.0514135	1.28892	-0.0942184	0.0827847	0.12794	-0.892994	-0.127201	0.0190114	0.0353493	-1.45162	0.213792	7.34941e-05	0.000208233	3.68145	0.204507	0.000150896	0.000427538	3.36903	0.119123	0.0281251	0.159376	0.797578	0.0904068	0.0960425	0.28058	0.551944	0.163014	0.00259797	0.0193224	1.71394	0.15093	0.00533007	0.0487906
93	STAT2,4,6	207.354	-0.231617	1.69229e-05	0.000144822	-3.83917	-0.0378353	0.486657	0.562255	-0.250067	0.0478801	0.378608	0.437576	0.358947	0.00405733	0.940553	0.948524	0.0229519	-0.0462513	0.395055	0.460897	-0.336396	-0.000442096	0.993519	0.993519	-0.00282401	0.020319	0.708769	0.753067	0.123166	0.0137764	0.80009	0.835182	0.078219	-0.0862216	0.112495	0.319736	-0.495208	-0.0824983	0.128924	0.338435	-0.470524	-0.0779564	0.15141	0.300297	-0.522449	-0.100781	0.0634494	0.215728
94	STAT5{A,B}	30.3372	-0.0763407	0.16009	0.229527	-0.639167	-0.220179	4.40037e-05	0.000174548	-3.75808	-0.22759	2.38205e-05	0.000104987	-3.97887	-0.212211	8.32509e-05	0.000450311	-3.34649	0.192478	0.000366196	0.00132052	2.87925	0.205952	0.000135188	0.00057455	3.24067	-0.258118	1.53341e-06	8.29438e-06	-5.08122	-0.246602	4.49719e-06	2.32681e-05	-4.63324	-0.063439	0.243227	0.507789	-0.294316	-0.0163133	0.764279	0.923933	-0.0343597	-0.117367	0.0305419	0.103405	-0.98546	-0.0811335	0.135391	0.322385
95	TBP	11.0856	-0.0844749	0.119985	0.178478	-0.748416	-0.211708	8.66044e-05	0.000312301	-3.50543	-0.237079	1.05412e-05	4.82462e-05	-4.31654	-0.214821	6.77316e-05	0.000424214	-3.37242	0.252423	2.62721e-06	1.91295e-05	4.7183	0.250606	3.11145e-06	2.84817e-05	4.54543	-0.24649	4.5434e-06	2.00246e-05	-4.69844	-0.241789	6.9462e-06	3.17922e-05	-4.49768	-0.0704087	0.195183	0.442956	-0.353639	-0.0372066	0.49393	0.707429	-0.150317	-0.107706	0.0472417	0.130739	-0.883596	-0.080474	0.138604	0.322385
96	TBX4,5	58.3227	0.172963	0.00138593	0.00515394	2.28786	0.0262974	0.628789	0.705904	0.151254	0.0630216	0.246346	0.299135	0.524133	0.0749955	0.167599	0.214454	0.668666	-0.0403923	0.457678	0.524506	-0.280249	-0.0458449	0.399224	0.456805	-0.340269	0.0597618	0.271671	0.313873	0.503247	0.0522336	0.336754	0.381654	0.41833	-0.026117	0.631146	0.799004	-0.0974511	-0.0185476	0.733147	0.922696	-0.0349412	0.0192834	0.722987	0.875625	0.0576819	0.0189253	0.727926	0.857655
97	TCF4_dimer	90.0484	-0.208208	0.0001137	0.000676514	-3.16972	-0.151529	0.00514942	0.0109425	-1.96088	-0.0352123	0.517382	0.56886	-0.244995	-0.0895227	0.0993481	0.14778	-0.830383	0.0335911	0.536861	0.59707	0.223975	0.0487112	0.370381	0.432111	0.364404	-0.109402	0.043851	0.0599801	-1.22199	-0.107576	0.0475106	0.0665148	-1.17708	-0.0853685	0.116106	0.319736	-0.495208	-0.103447	0.0567377	0.23521	-0.628544	-0.113141	0.0370952	0.11531	-0.938133	-0.115583	0.0331758	0.146219
98	TEAD1	235.418	0.000220132	0.996774	0.996774	0.00140338	0.118923	0.0283925	0.0496869	1.30376	0.0478667	0.378742	0.437576	0.358947	0.0135542	0.803249	0.824023	0.0840609	-0.00475192	0.930399	0.933063	-0.0300892	-0.0739153	0.173816	0.232406	-0.633753	0.0945521	0.081698	0.104538	0.980724	0.0908062	0.0945786	0.12018	0.92017	0.0381555	0.482974	0.709555	0.149014	0.0187973	0.729693	0.922696	0.0349412	0.0453546	0.40429	0.592109	0.227598	0.035415	0.514972	0.738334
99	TFAP2B	0.00782516	0.239289	8.67684e-06	9.38676e-05	4.02748	0.154817	0.00425245	0.00937114	2.02821	0.198042	0.000244545	0.000786509	3.1043	0.204648	0.000149293	0.000740246	3.13062	-0.21272	7.99833e-05	0.000352519	-3.45282	-0.217565	5.43803e-05	0.000270572	-3.56772	0.216789	5.7879e-05	0.000176605	3.753	0.215571	6.38029e-05	0.000205204	3.68781	0.0208301	0.701789	0.846819	0.0722096	0.00299026	0.956169	0.992211	0.00339591	0.0838285	0.122853	0.265809	0.57543	0.0789423	0.146292	0.322385
100	TFAP2{A,C}	94.2226	0.0937244	0.0844147	0.133938	0.873096	0.0427429	0.431911	0.508885	0.29338	0.139349	0.0101433	0.0180157	1.74435	0.123631	0.0226617	0.0457074	1.34001	-0.171556	0.00151782	0.00451551	-2.34529	-0.191519	0.000392155	0.00122806	-2.91078	0.11949	0.0276419	0.0411173	1.38598	0.120496	0.0263521	0.0412619	1.38445	-0.0579967	0.286101	0.553423	-0.256943	-0.0904154	0.096011	0.28058	-0.551944	0.0132397	0.807724	0.907673	0.0420707	0.00366256	0.946328	0.974962
101	TFAP4	14.3364	0.0221109	0.684408	0.750244	0.124798	0.144888	0.00749711	0.0156519	1.80543	0.24123	7.30189e-06	3.4757e-05	4.45896	0.201255	0.000192743	0.000849498	3.07084	-0.253248	2.43176e-06	1.91295e-05	-4.7183	-0.274026	3.18925e-07	3.7952e-06	-5.42077	0.22897	2.12009e-05	7.64517e-05	4.11661	0.221207	4.04611e-05	0.000141614	3.84889	-0.0576084	0.289343	0.553423	-0.256943	-0.0992222	0.0676665	0.241161	-0.617693	0.0407089	0.454158	0.635821	0.196665	0.0131866	0.80848	0.914284
102	TFCP2	35.8834	-0.0915838	0.0917791	0.14184	-0.8482	-0.0245235	0.652123	0.72181	-0.141577	0.148016	0.00629268	0.0124805	1.90377	0.117531	0.0303082	0.0546465	1.26244	-0.175935	0.0011412	0.00357376	-2.44687	-0.168544	0.00183969	0.00456089	-2.34095	0.0853585	0.116149	0.142492	0.846209	0.08026	0.139659	0.171334	0.766156	-0.180637	0.000834112	0.0165432	-1.78138	-0.204515	0.000150808	0.00866921	-2.06202	-0.0797346	0.142276	0.291911	-0.53475	-0.101607	0.0613021	0.214557
103	TFDP1	88.6954	0.377018	8.64701e-13	1.02899e-10	9.98759	0.188876	0.000472819	0.00127876	2.89321	0.106058	0.0507458	0.0753912	1.12268	0.167885	0.00191792	0.00570582	2.24368	-0.100631	0.0638438	0.102668	-0.988566	-0.137298	0.011316	0.0232173	-1.63419	0.177111	0.00105591	0.00220445	2.6567	0.183499	0.000686688	0.00170241	2.76893	0.142704	0.00845658	0.0718809	1.14339	0.158786	0.0033593	0.0499696	1.30129	0.161171	0.00290807	0.0203565	1.6913	0.179909	0.000876058	0.0173751
104	TGIF1	49.7	0.126901	0.0192969	0.043327	1.36324	0.30131	1.70854e-08	3.25179e-07	6.48788	0.389615	1.10752e-13	1.31795e-11	10.8801	0.340904	1.39942e-10	1.66531e-08	7.77851	-0.368569	3.08229e-12	3.66793e-10	-9.43558	-0.332794	3.96449e-10	2.35887e-08	-7.6273	0.400015	1.48732e-14	8.84954e-13	12.0531	0.381928	3.99301e-13	2.37584e-11	10.6242	0.0206317	0.704496	0.846819	0.0722096	-0.00571336	0.916364	0.982408	-0.00770806	0.125498	0.0206827	0.0820414	1.08597	0.0823542	0.129595	0.322385
105	TLX1..3_NFIC{dimer}	0.00279493	-0.106698	0.0493595	0.0903658	-1.044	0.063806	0.240507	0.314509	0.502367	0.117168	0.0308267	0.0476412	1.32202	0.0540554	0.320155	0.369887	0.43193	-0.0950968	0.0799492	0.125184	-0.902453	-0.123673	0.0226153	0.0404607	-1.39297	0.111346	0.0402188	0.0556516	1.25452	0.103048	0.0577016	0.0798429	1.09776	-0.0647585	0.233547	0.505311	-0.296441	-0.0902875	0.0964836	0.28058	-0.551944	-0.0116423	0.830548	0.912522	-0.0397568	-0.040729	0.453934	0.692727
106	TLX2	0.220768	-0.179423	0.000905101	0.00359023	-2.44488	-0.0559282	0.303657	0.38855	-0.410553	-0.145254	0.00734648	0.0141005	-1.85077	-0.148825	0.00601094	0.0152192	-1.81761	0.162182	0.00273401	0.00707276	2.15041	0.127534	0.0186985	0.0353194	1.45199	-0.128178	0.0181064	0.0272742	-1.56425	-0.127249	0.0189658	0.0313462	-1.50381	0.0324932	0.550258	0.758951	0.119786	0.0105624	0.84606	0.936006	0.0287213	-0.0167404	0.758296	0.87609	-0.0574514	-0.020839	0.701668	0.857655
107	TP53	56.9942	-0.162054	0.00275554	0.00886243	-2.05245	-0.207804	0.00011729	0.000387708	-3.4115	-0.140147	0.00971715	0.0175203	-1.75646	-0.136543	0.0117768	0.0264423	-1.5777	0.0571507	0.293197	0.356025	0.44852	0.0654589	0.228521	0.292409	0.534009	-0.192272	0.000371611	0.000921286	-3.03561	-0.176616	0.00109111	0.00246071	-2.60894	-0.113713	0.0361424	0.178811	-0.747607	-0.135575	0.0123923	0.105335	-0.977427	-0.110103	0.0425112	0.120448	-0.919199	-0.0934976	0.0851718	0.247206
108	XBP1	262.844	0.0668155	0.219007	0.296157	0.528478	0.151982	0.00501637	0.0108536	1.96443	0.164279	0.00240293	0.00587918	2.23068	0.124373	0.0218561	0.0448426	1.34831	-0.0907891	0.0946409	0.144388	-0.840469	-0.0984885	0.0697301	0.107765	-0.967523	0.186203	0.000569887	0.00130416	2.88467	0.16594	0.00216711	0.0042981	2.36672	0.00375721	0.944943	0.979811	0.00885771	-0.0328024	0.546468	0.756159	-0.121387	0.0467611	0.389861	0.592109	0.227598	0.0228681	0.67421	0.853521
109	YY1	48.0993	-0.049007	0.367479	0.465213	-0.332348	-0.227342	2.43225e-05	0.000115545	-3.93725	-0.309366	6.79232e-09	1.09971e-07	-6.95872	-0.233227	1.47357e-05	0.000109597	-3.9602	0.302548	1.48534e-08	2.52507e-07	6.59773	0.320293	1.86006e-09	6.2387e-08	7.20491	-0.305329	1.08198e-08	9.90431e-08	-7.00418	-0.294932	3.47908e-08	3.45009e-07	-6.46217	0.0223961	0.680561	0.846819	0.0722096	0.0824259	0.12926	0.338435	0.470524	-0.093337	0.0857111	0.203993	-0.690386	-0.046269	0.394874	0.626533
110	ZBTB6	7.06628	0.0689029	0.204926	0.280301	0.552376	-0.225843	2.75789e-05	0.000119872	-3.92128	-0.135971	0.0121375	0.0209328	-1.67917	-0.0808593	0.136719	0.193686	-0.712902	0.120706	0.0260899	0.0470409	1.32752	0.108156	0.0463225	0.075512	1.12198	-0.189316	0.000458408	0.00109101	-2.96217	-0.182432	0.000738541	0.0017727	-2.75137	-0.146166	0.00698245	0.0718809	-1.14339	-0.102243	0.0596902	0.23521	-0.628544	-0.172405	0.00143688	0.0127288	-1.89521	-0.140465	0.0095517	0.0668619
111	ZEB1	89.4955	-0.0285845	0.599243	0.692329	-0.159688	-0.120477	0.0263759	0.0475565	-1.32279	-0.0690467	0.20398	0.255512	-0.592589	-0.0569629	0.294787	0.343919	-0.463544	0.0331618	0.54208	0.597292	0.223813	0.0269645	0.620106	0.664799	0.17731	-0.112069	0.0389355	0.0549697	-1.25988	-0.100477	0.0642533	0.0859117	-1.06595	0.00306262	0.95511	0.979811	0.00885771	0.0116676	0.830184	0.936006	0.0287213	-0.0453625	0.404208	0.592109	-0.227598	-0.0356837	0.511787	0.738334
112	ZFP161	8.403	0.289191	6.50574e-08	1.29031e-06	5.88931	0.155673	0.00404351	0.00921673	2.03542	0.219889	4.5054e-05	0.000184877	3.73312	0.246028	4.73858e-06	4.69909e-05	4.32799	-0.244291	5.54712e-06	3.47425e-05	-4.45914	-0.215454	6.43993e-05	0.000306541	-3.51351	0.235198	1.2423e-05	4.61982e-05	4.33538	0.233293	1.46521e-05	5.812e-05	4.23567	0.0168519	0.756738	0.849545	0.0708136	0.0148804	0.784449	0.924252	0.0342097	0.0696961	0.199751	0.354781	0.45004	0.0661535	0.223614	0.409385
113	ZIC1..3	0.831573	-0.139299	0.0101708	0.0263113	-1.57986	-0.206214	0.000132513	0.00042619	-3.3704	-0.0418856	0.44121	0.500038	-0.300997	-0.0955071	0.0786518	0.119994	-0.920839	0.0259423	0.633431	0.685257	0.164146	0.0543082	0.317894	0.394056	0.404442	-0.129001	0.0173728	0.0270103	-1.56847	-0.130817	0.015847	0.0273303	-1.56336	-0.207228	0.000122606	0.00486336	-2.31306	-0.206476	0.000129885	0.00866921	-2.06202	-0.171855	0.00148887	0.0127288	-1.89521	-0.17447	0.00125633	0.0188362
114	ZNF143	17.4314	0.128929	0.0174365	0.0406851	1.39056	-0.141076	0.00924082	0.0186383	-1.72959	-0.212388	8.21019e-05	0.000315166	-3.50146	-0.1294	0.0170271	0.0355479	-1.44919	0.165681	0.00220246	0.00582429	2.23476	0.179672	0.000890114	0.00246334	2.60848	-0.191735	0.000386158	0.000937812	-3.02788	-0.175179	0.00119934	0.002643	-2.5779	0.0321188	0.554863	0.758951	0.119786	0.0793398	0.144266	0.35766	0.446529	-0.044997	0.408008	0.592109	-0.227598	0.00244832	0.964107	0.974962
115	ZNF148	34.0308	0.11655	0.0317248	0.0639874	1.19391	-0.0578062	0.287688	0.372119	-0.429319	-0.0697801	0.199208	0.252189	-0.598273	-0.0468973	0.388481	0.444512	-0.352117	0.0675302	0.21411	0.276946	0.557605	0.0349928	0.519998	0.567705	0.245878	-0.0606676	0.264462	0.308539	-0.51069	-0.0603507	0.266969	0.311464	-0.506593	-0.0413155	0.447456	0.682657	-0.165797	-0.0322629	0.553088	0.756523	-0.121178	-0.00411595	0.939695	0.947659	-0.0233479	0.019033	0.726438	0.857655
116	ZNF238	2.72838	-0.06929	0.202388	0.280301	-0.552376	0.0858555	0.114034	0.159647	0.796839	0.246214	4.65915e-06	2.52018e-05	4.59857	0.183834	0.000671066	0.0024199	2.6162	-0.241291	7.2628e-06	4.32137e-05	-4.36438	-0.202403	0.000176864	0.000709287	-3.14918	0.193561	0.000338803	0.000857821	3.0666	0.17874	0.000947424	0.00221066	2.65548	-0.0770911	0.156013	0.386782	-0.412534	-0.120268	0.0266398	0.164931	-0.782699	-0.00959239	0.860044	0.922029	-0.0352552	-0.0433749	0.425129	0.665662
117	ZNF384	37.6442	0.115344	0.0335431	0.0665272	1.177	0.240379	7.87721e-06	4.93362e-05	4.30683	0.190827	0.000411926	0.00122548	2.91169	0.213049	7.79388e-05	0.000441653	3.35492	-0.224806	3.00687e-05	0.000162644	-3.78876	-0.222436	3.65791e-05	0.00019786	-3.70364	0.224261	3.14608e-05	0.000110113	3.95816	0.222426	3.66104e-05	0.000132019	3.87936	0.0996493	0.0664884	0.260949	0.583444	0.0775412	0.153606	0.365582	0.437015	0.174809	0.00122879	0.0127288	1.89521	0.144374	0.00771396	0.0637669
118	ZNF423	0.933682	-0.0180099	0.740601	0.786888	-0.104087	0.0865342	0.111194	0.157525	0.80265	0.133785	0.0136048	0.0231281	1.63586	0.0746624	0.169498	0.214577	0.668417	-0.0753283	0.165717	0.224094	-0.649569	-0.130523	0.0160858	0.0308743	-1.5104	0.134014	0.013444	0.0225329	1.64718	0.119514	0.0276107	0.042124	1.37547	-0.0613064	0.259458	0.529236	-0.27635	-0.0987804	0.0689031	0.241161	-0.617693	0.0269419	0.620399	0.802473	0.0955695	0.00120447	0.982339	0.982339
119	bHLH_family	579.005	-0.163623	0.00250241	0.0085082	-2.07016	-0.315332	3.37008e-09	1.0026e-07	-6.99887	-0.223408	3.37623e-05	0.00014349	-3.84318	-0.180771	0.000826617	0.00289316	-2.53863	0.179305	0.00091228	0.00293409	2.53253	0.208878	0.000107962	0.000475834	3.32254	-0.297174	2.71461e-08	2.01899e-07	-6.69486	-0.282579	1.31585e-07	9.78665e-07	-6.00937	-0.159114	0.00329366	0.0391945	-1.40677	-0.110519	0.0417325	0.198647	-0.701919	-0.203632	0.000161225	0.00747558	-2.12636	-0.17435	0.0012663	0.0188362
[truncated: 9 more columns]

## Sheet: Table S6B
	pathway	size	GrowthRate_rho	GrowthRate_pvalue	GrowthRate_fdr	GrowthRate_enrichment.GSEA_pval	Area_rho	Area_pvalue	Area_fdr	Area_enrichment.GSEA_pval	Compactness_rho	Compactness_pvalue	Compactness_fdr	Compactness_enrichment.GSEA_pval	Eccentricity_rho	Eccentricity_pvalue	Eccentricity_fdr	Eccentricity_enrichment.GSEA_pval	Extent_rho	Extent_pvalue	Extent_fdr	Extent_enrichment.GSEA_pval	FormFactor_rho	FormFactor_pvalue	FormFactor_fdr	FormFactor_enrichment.GSEA_pval	MajorAxisLength_rho	MajorAxisLength_pvalue	MajorAxisLength_fdr	MajorAxisLength_enrichment.GSEA_pval	MaxFeretDiameter_rho	MaxFeretDiameter_pvalue	MaxFeretDiameter_fdr	MaxFeretDiameter_enrichment.GSEA_pval	MaximumRadius_rho	MaximumRadius_pvalue	MaximumRadius_fdr	MaximumRadius_enrichment.GSEA_pval	MedianRadius_rho	MedianRadius_pvalue	MedianRadius_fdr	MedianRadius_enrichment.GSEA_pval	MinFeretDiameter_rho	MinFeretDiameter_pvalue	MinFeretDiameter_fdr	MinFeretDiameter_enrichment.GSEA_pval	MinorAxisLength_rho	MinorAxisLength_pvalue	MinorAxisLength_fdr
1	GO__DE_NOVO_PROTEIN_FOLDING	18	0.0973296	0.0730946	0.129783	0.886781	-0.134527	0.0130902	0.0371251	-1.43033	-0.149694	0.00572102	0.0166519	-1.77854	-0.100991	0.0628979	0.122478	-0.911942	0.191046	0.00040556	0.00226276	2.64536	0.189652	0.000447666	0.0023222	2.6341	-0.166265	0.00212354	0.00647438	-2.1888	-0.163086	0.00258663	0.00780097	-2.10785	-0.0184514	0.734479	0.850651	-0.0702486	0.0326647	0.548154	0.693854	0.158732	-0.0755835	0.164285	0.437516	-0.359007	-0.0385729	0.478197	0.733195
2	GO_1_PHOSPHATIDYLINOSITOL_BINDING	16	-0.000182578	0.997325	0.998226	-0.000771166	0.0890451	0.101171	0.183758	0.735754	0.181284	0.000798425	0.00329647	2.48195	0.122887	0.0234936	0.0548638	1.26071	-0.158415	0.00343486	0.0119515	-1.92258	-0.169172	0.00176781	0.0069489	-2.15808	0.148328	0.00618283	0.0158323	1.80046	0.144938	0.00747669	0.0189159	1.72317	-0.0360901	0.50699	0.691918	-0.159946	-0.0631581	0.245323	0.419283	-0.377493	0.0157778	0.7718	0.891595	0.0498323	-0.00452874	0.933661	0.968539
3	GO_14_3_3_PROTEIN_BINDING	18	0.0727294	0.180838	0.273604	0.562878	0.0519594	0.339299	0.462348	0.335031	0.155245	0.00414672	0.0126777	1.89696	0.132663	0.0144172	0.0370895	1.43075	-0.191229	0.00040032	0.00224482	-2.64882	-0.153837	0.00450376	0.0144892	-1.83895	0.122172	0.0243192	0.0496699	1.30391	0.11327	0.0368775	0.0713083	1.14686	-0.089755	0.0984708	0.274512	-0.561439	-0.116649	0.0315795	0.156057	-0.806716	0.0159381	0.769546	0.890892	0.0501748	-0.00520165	0.923831	0.966099
4	GO_2_IRON_2_SULFUR_CLUSTER_BINDING	23	0.0434118	0.424734	0.534842	0.271775	-0.0444505	0.41373	0.535913	-0.270906	-0.146086	0.00701362	0.0196275	-1.70714	-0.079446	0.143728	0.236522	-0.626128	0.141578	0.00899229	0.0257006	1.59006	0.0979927	0.0711537	0.126896	0.89655	-0.113533	0.0364398	0.0699733	-1.15507	-0.0953325	0.0792019	0.135099	-0.869347	0.0888213	0.102034	0.279548	0.553544	0.117959	0.0297082	0.1525	0.816731	-0.0171966	0.751923	0.882324	-0.0543718	0.0208213	0.70191	0.871568
5	GO_2_OXOGLUTARATE_METABOLIC_PROCESS	19	0.0819105	0.131679	0.210211	0.677344	-0.00192104	0.971834	0.98136	-0.00817171	0.0140179	0.796661	0.854737	0.0681673	0.0142683	0.793111	0.85507	0.0679982	-0.0043944	0.935624	0.955467	-0.0197844	-0.034736	0.523067	0.614188	-0.211699	0.0156605	0.773449	0.824243	0.0839446	0.0202558	0.709634	0.776792	0.109695	-0.0253619	0.64105	0.78962	-0.102582	-0.00863309	0.873918	0.924378	-0.0341504	0.00201722	0.970425	0.985553	0.0063201	0.00733611	0.892736	0.95846
6	GO_3_5_EXONUCLEASE_ACTIVITY	45	0.278556	1.77859e-07	1.73933e-06	5.75962	0.241252	6.83653e-06	0.000142737	3.84546	0.223815	3.11766e-05	0.000238949	3.6217	0.215206	6.31923e-05	0.000420965	3.37575	-0.136855	0.0115343	0.0312999	-1.50446	-0.13495	0.0127532	0.032847	-1.4835	0.267734	5.4329e-07	7.03735e-06	5.15259	0.260796	1.08385e-06	1.36018e-05	4.8664	0.0998588	0.0658969	0.223696	0.650342	0.10105	0.0627207	0.205357	0.68749	0.108161	0.0462724	0.250612	0.600999	0.104323	0.0546326	0.274501
7	GO_4_IRON_4_SULFUR_CLUSTER_BINDING	39	0.355883	1.87488e-11	6.01864e-10	9.2205	0.235005	1.26335e-05	0.000217687	3.66217	0.242968	6.24954e-06	6.59177e-05	4.181	0.227322	2.43643e-05	0.000201509	3.69571	-0.198648	0.000233876	0.0014801	-2.82971	-0.198498	0.000236469	0.00141562	-2.84905	0.288923	6.69695e-08	1.32444e-06	5.87797	0.285619	9.53994e-08	1.98413e-06	5.70243	0.0908767	0.0943219	0.269752	0.569035	0.0947683	0.0810003	0.232253	0.634038	0.137469	0.011214	0.12937	0.888165	0.13889	0.010396	0.139395
8	GO_90S_PRERIBOSOME	24	0.126959	0.0192417	0.0424716	1.3719	-0.0583161	0.283452	0.405151	-0.392383	-0.0557905	0.30485	0.407386	-0.389993	-0.00740328	0.891759	0.923228	-0.0346908	0.148163	0.00624066	0.0190575	1.71993	0.131589	0.0152348	0.0378165	1.42232	-0.0643723	0.236352	0.328019	-0.484101	-0.0677912	0.212341	0.301593	-0.520578	-0.0297875	0.583958	0.747445	-0.126421	0.0404936	0.456549	0.616491	0.210073	-0.0427301	0.432049	0.687669	-0.162621	-0.0217442	0.689368	0.867267
9	GO_A_BAND	18	0.029574	0.586657	0.686447	0.163393	0.138284	0.010738	0.0318615	1.49673	0.217985	5.25713e-05	0.000353218	3.45196	0.164805	0.00232586	0.00837009	2.07727	-0.268903	5.3456e-07	1.08401e-05	-4.96497	-0.220857	4.16365e-05	0.000358468	-3.44555	0.186638	0.000552919	0.00207403	2.68318	0.178968	0.000933105	0.00334168	2.47604	-0.00811558	0.881418	0.940208	-0.0267761	-0.0614367	0.258445	0.429288	-0.367251	0.0679958	0.210962	0.490069	0.309743	0.0329759	0.544348	0.782877
10	GO_ACETYL_COA_METABOLIC_PROCESS	21	-0.135105	0.0127009	0.0296515	-1.52795	-0.156216	0.00391566	0.0146754	-1.83341	-0.0420114	0.439839	0.540152	-0.267484	-0.104274	0.0547785	0.109656	-0.959968	-0.0368918	0.497594	0.593955	-0.226247	0.0226358	0.677333	0.745858	0.127344	-0.11396	0.035739	0.0688964	-1.1618	-0.114255	0.0352607	0.0687522	-1.16271	-0.117849	0.0298606	0.143	-0.844664	-0.15193	0.00503171	0.0819561	-1.08642	-0.0859135	0.113789	0.368702	-0.433325	-0.101936	0.0604639	0.291982
11	GO_ACETYLGALACTOSAMINYLTRANSFERASE_ACTIVITY	21	0.0327774	0.546774	0.650607	0.186681	0.0787472	0.147294	0.246882	0.607511	0.164987	0.00229976	0.00789152	2.10284	0.154784	0.00426077	0.0137574	1.86146	-0.158405	0.00343687	0.0119515	-1.92258	-0.143287	0.00819047	0.0229387	-1.63943	0.144968	0.00746391	0.0186177	1.73007	0.138913	0.010383	0.0249846	1.60233	-0.0738041	0.174466	0.384191	-0.415452	-0.0845634	0.119596	0.285151	-0.544925	-0.0176121	0.746132	0.878619	-0.0561995	-0.0434292	0.424549	0.699864
12	GO_ACETYLGLUCOSAMINYLTRANSFERASE_ACTIVITY	32	0.114828	0.0343478	0.0692269	1.15973	0.0910214	0.0937969	0.17335	0.761076	0.157058	0.0037249	0.011728	1.93078	0.159885	0.00314403	0.0107304	1.96938	-0.161847	0.00279063	0.0101498	-1.99354	-0.169263	0.00175765	0.00692124	-2.15982	0.155291	0.00413562	0.0113702	1.94423	0.151042	0.00529594	0.0141758	1.84845	-0.0345348	0.525478	0.704568	-0.152077	-0.0492259	0.365341	0.532564	-0.273628	0.0509534	0.348742	0.620951	0.206943	0.0487603	0.369898	0.66208
13	GO_ACETYLTRANSFERASE_ACTIVITY	85	0.197889	0.000240818	0.000977841	3.00973	0.0822697	0.130036	0.22476	0.648281	0.212774	7.67654e-05	0.000473636	3.32456	0.223249	3.26878e-05	0.000251838	3.59888	-0.14442	0.00764965	0.0226221	-1.64547	-0.138604	0.010507	0.0281244	-1.55092	0.18569	0.000578887	0.0021514	2.66728	0.181481	0.000773858	0.00286088	2.5435	-0.049285	0.364949	0.574692	-0.240565	-0.050739	0.350956	0.520523	-0.28356	-0.0151132	0.781271	0.89757	-0.0469317	-0.0347553	0.523025	0.766387
14	GO_ACETYLTRANSFERASE_COMPLEX	90	0.263053	8.6764e-07	6.98844e-06	5.15562	0.21028	9.3499e-05	0.000862917	3.06403	0.214434	6.72337e-05	0.000430413	3.36612	0.236991	1.0013e-05	0.000102668	3.98856	-0.168891	0.00177677	0.00721458	-2.14179	-0.199186	0.000218693	0.00133521	-2.87445	0.258719	1.32774e-06	1.42075e-05	4.84748	0.256972	1.57275e-06	1.76835e-05	4.75243	0.0386082	0.477988	0.672431	0.172352	0.0405322	0.456313	0.616491	0.210073	0.0887032	0.10251	0.353127	0.452069	0.0704505	0.19502	0.490212
15	GO_ACID_AMINO_ACID_LIGASE_ACTIVITY	15	0.0611326	0.260813	0.369373	0.432534	0.0371056	0.495105	0.613686	0.212053	0.0569816	0.294629	0.397324	0.400856	0.0737244	0.174932	0.274416	0.561591	-0.0842999	0.120756	0.19481	-0.710388	-0.063489	0.242854	0.335887	-0.473807	0.0648221	0.233088	0.324303	0.489049	0.0697025	0.199709	0.287322	0.541631	-0.00667144	0.902403	0.952632	-0.0210746	-0.0203721	0.708042	0.814074	-0.0893361	-0.0143932	0.791342	0.903452	-0.0440949	-0.00604035	0.911596	0.964231
16	GO_ACID_SECRETION	33	-0.0887572	0.102282	0.171049	-0.766878	0.0391515	0.471618	0.591861	0.227781	0.183833	0.00067115	0.00285062	2.54506	0.115105	0.0339134	0.0741177	1.13008	-0.237441	1.02115e-05	0.000120955	-3.91738	-0.196026	0.000283428	0.00163275	-2.78708	0.116261	0.0321534	0.0628961	1.20138	0.110632	0.0415219	0.0788773	1.10305	-0.0920262	0.0902163	0.263569	-0.579106	-0.158962	0.00332398	0.0765048	-1.11631	-0.00962536	0.859568	0.938712	-0.0274675	-0.0385637	0.478302	0.733195
17	GO_ACROSOMAL_VESICLE	42	-0.0746642	0.169487	0.259175	-0.586407	-0.104389	0.0545097	0.113264	-0.945909	-0.129609	0.0168485	0.0398499	-1.39957	-0.114575	0.034748	0.0754577	-1.1223	0.0932579	0.0859777	0.149424	0.82558	0.0926512	0.088045	0.150769	0.821688	-0.145102	0.00740895	0.0184911	-1.73304	-0.130117	0.0164208	0.0364632	-1.43815	0.00431166	0.936834	0.96944	0.013479	-0.0067209	0.901683	0.942979	-0.0254981	-0.029614	0.586151	0.78769	-0.103645	-0.0324016	0.551383	0.787691
18	GO_ACTIN_BASED_CELL_PROJECTION	113	0.127597	0.0186394	0.0413689	1.38333	0.152485	0.00487253	0.0174497	1.75821	0.201606	0.000187743	0.00098078	3.00843	0.158167	0.00348625	0.0117001	1.93181	-0.219199	4.76513e-05	0.000425595	-3.371	-0.236011	1.15735e-05	0.000129047	-3.88925	0.184997	0.00061948	0.00228501	2.64111	0.180257	0.000855744	0.00310988	2.50726	0.0053995	0.920943	0.961078	0.0172412	-0.0353347	0.515926	0.665792	-0.176661	0.121323	0.0253316	0.197569	0.704282	0.10036	0.0645653	0.300514
19	GO_ACTIN_BINDING	263	0.259894	1.18404e-06	9.19027e-06	5.03667	0.248944	3.37213e-06	8.635e-05	4.06374	0.279456	1.61736e-07	3.75967e-06	5.42485	0.258702	1.32997e-06	2.49651e-05	4.60267	-0.297387	2.26648e-08	9.21149e-07	-6.03567	-0.329276	4.85864e-10	5.00553e-08	-7.30055	0.298246	2.05569e-08	5.29459e-07	6.27617	0.297751	2.17468e-08	6.29663e-07	6.20089	0.0270926	0.618615	0.773487	0.111547	-0.0151236	0.781124	0.864888	-0.0630403	0.153563	0.00454005	0.084488	1.0732	0.131681	0.01511	0.163633
20	GO_ACTIN_CYTOSKELETON	315	0.196918	0.000258736	0.001042	2.98213	0.138342	0.0106555	0.0316804	1.49921	0.194097	0.000318112	0.00152185	2.81763	0.165792	0.00216185	0.00781797	2.10691	-0.191349	0.000387958	0.0021932	-2.65892	-0.224519	2.9389e-05	0.000277024	-3.55748	0.175794	0.00113421	0.00385024	2.41451	0.173576	0.00131254	0.00444538	2.35209	-0.0211317	0.697825	0.826347	-0.0828377	-0.0415497	0.445078	0.607592	-0.216388	0.0917641	0.0911465	0.330966	0.480216	0.0779259	0.151637	0.439695
21	GO_ACTIN_CYTOSKELETON_REORGANIZATION	43	0.0730271	0.179056	0.271278	0.566585	0.100116	0.0652217	0.130793	0.883415	0.167204	0.00200207	0.00701444	2.15401	0.142668	0.008473	0.0242912	1.61455	-0.200465	0.000204431	0.00134766	-2.87042	-0.157217	0.00368967	0.0123734	-1.90751	0.148099	0.00626343	0.016011	1.79558	0.139913	0.00984056	0.0239132	1.62136	-0.0439101	0.419434	0.627522	-0.202371	-0.0708273	0.192536	0.367342	-0.434929	0.0657505	0.226452	0.508971	0.293307	0.0414474	0.446006	0.712003
22	GO_ACTIN_FILAMENT	49	0.260691	1.19747e-06	9.27412e-06	5.03273	0.0791709	0.145124	0.24417	0.612307	0.156207	0.00391771	0.0121789	1.91439	0.167665	0.00194482	0.00719161	2.14317	-0.161931	0.0027763	0.0101143	-1.99506	-0.171706	0.00150318	0.00609248	-2.21521	0.124093	0.0221575	0.0460629	1.33665	0.128996	0.0173774	0.0382423	1.41746	-0.0365667	0.501393	0.68813	-0.16233	-0.0502463	0.355478	0.523492	-0.28109	0.0471874	0.385551	0.655338	0.183535	0.0436072	0.422651	0.699402
23	GO_ACTIN_FILAMENT_BASED_MOVEMENT	45	0.113854	0.035912	0.0715656	1.1453	0.180201	0.000859023	0.00467503	2.33022	0.264301	8.42735e-07	1.30536e-05	4.88427	0.20634	0.000131239	0.000775182	3.1106	-0.227737	2.3529e-05	0.000244679	-3.6114	-0.255948	1.88532e-06	3.01514e-05	-4.52069	0.241594	7.0688e-06	5.38055e-05	4.26917	0.238627	9.1998e-06	7.16259e-05	4.14493	-0.0310075	0.568644	0.734002	-0.134303	-0.0305214	0.574722	0.713171	-0.146806	0.0749347	0.167944	0.441518	0.355052	0.045205	0.405843	0.692582
24	GO_ACTIN_FILAMENT_BASED_PROCESS	320	0.177358	0.00102216	0.00345926	2.46102	0.204317	0.000148459	0.00120896	2.91759	0.265777	6.61433e-07	1.12266e-05	4.94975	0.216746	5.58022e-05	0.000382077	3.41785	-0.260009	1.17081e-06	2.04201e-05	-4.68994	-0.294916	2.99579e-08	1.1343e-06	-5.94527	0.255977	1.73118e-06	1.74504e-05	4.7582	0.250732	2.85169e-06	2.81986e-05	4.54977	-0.0340445	0.531565	0.709287	-0.149178	-0.0698213	0.199048	0.372847	-0.428469	0.122738	0.0236111	0.189544	0.722289	0.090732	0.0948597	0.355523
25	GO_ACTIN_FILAMENT_BINDING	77	0.161582	0.0028362	0.00824435	2.08384	0.147315	0.0065464	0.0217856	1.66183	0.241567	7.0854e-06	7.31663e-05	4.13569	0.197859	0.000247871	0.00128279	2.89184	-0.205099	0.000144263	0.00101927	-2.99171	-0.23074	1.82397e-05	0.000187042	-3.72806	0.217702	5.37832e-05	0.000297825	3.52604	0.212384	8.21236e-05	0.000439913	3.35663	-0.0663019	0.222575	0.440969	-0.355592	-0.0750678	0.167188	0.338621	-0.470286	0.0353512	0.51573	0.740031	0.13075	0.00707873	0.896477	0.959814
26	GO_ACTIN_FILAMENT_BUNDLE	42	0.243512	5.95096e-06	3.89405e-05	4.4096	0.149732	0.00570848	0.0196755	1.70607	0.160515	0.0030264	0.0098508	2.00653	0.148764	0.00603181	0.0182645	1.73839	-0.148073	0.00627252	0.0191372	-1.71812	-0.190163	0.000431772	0.00226361	-2.6452	0.159276	0.00326173	0.00924469	2.03411	0.158702	0.00337634	0.00978875	2.00927	0.00482459	0.929338	0.965744	0.0151381	-0.0241184	0.657502	0.777973	-0.109035	0.104074	0.0552468	0.267566	0.572569	0.0975619	0.0724097	0.319499
27	GO_ACTIN_FILAMENT_BUNDLE_ORGANIZATION	41	-0.0301486	0.579405	0.679937	-0.167531	0.0344008	0.527087	0.641659	0.192696	0.0359447	0.508703	0.605306	0.218025	0.0089265	0.86967	0.907144	0.042324	-0.0250615	0.645009	0.72339	-0.140628	-0.0939238	0.0837538	0.144877	-0.839002	0.0323597	0.551898	0.641539	0.192777	0.0234357	0.666604	0.741415	0.129938	-0.059204	0.276177	0.49373	-0.306511	-0.0843537	0.120519	0.285813	-0.543918	0.0451305	0.406618	0.668275	0.175044	0.0277748	0.609631	0.819128
28	GO_ACTIN_FILAMENT_ORGANIZATION	128	0.138779	0.010458	0.0251926	1.59873	0.124914	0.0212851	0.0545678	1.26306	0.196943	0.000265081	0.00130608	2.88403	0.159955	0.00313066	0.010693	1.9709	-0.20314	0.000167327	0.00114215	-2.94228	-0.241296	7.25944e-06	8.83497e-05	-4.05379	0.17009	0.00166733	0.00529483	2.27615	0.161851	0.00278991	0.00830597	2.08061	-0.059864	0.270851	0.488944	-0.310741	-0.100252	0.0648555	0.209063	-0.679724	0.0804401	0.13877	0.399969	0.397974	0.0510163	0.348147	0.643156
29	GO_ACTIN_FILAMENT_POLYMERIZATION	17	-0.0396375	0.466129	0.575838	-0.2397	0.00930722	0.864164	0.908459	0.0416946	0.140123	0.0097298	0.0254595	1.59415	0.133558	0.0137663	0.0356637	1.44777	-0.162599	0.00266508	0.00977854	-2.00973	-0.165777	0.00218937	0.00821941	-2.08516	0.0728094	0.180358	0.262997	0.580049	0.0624717	0.250498	0.344736	0.462513	-0.0842474	0.120988	0.308921	-0.510153	-0.1238	0.0224756	0.140235	-0.853143	-0.00585625	0.91428	0.960233	-0.0176236	-0.0312288	0.565886	0.799355
30	GO_ACTIN_MEDIATED_CELL_CONTRACTION	30	0.0459389	0.398257	0.509613	0.29276	0.121876	0.0246683	0.0614626	1.21139	0.203095	0.00016789	0.000900425	3.04555	0.156105	0.0039415	0.012919	1.88877	-0.180753	0.000827623	0.00395509	-2.40284	-0.221685	3.8908e-05	0.000343351	-3.46426	0.173279	0.00135777	0.00446543	2.35014	0.174152	0.00128271	0.00436463	2.36005	-0.0443586	0.414697	0.622959	-0.205541	-0.0501101	0.356784	0.524753	-0.280045	0.0467373	0.390103	0.656849	0.182534	0.0212011	0.696738	0.870977
31	GO_ACTIN_MONOMER_BINDING	17	0.289713	6.14916e-08	7.16863e-07	6.14456	0.161028	0.00293357	0.0118682	1.92561	0.115045	0.0340073	0.0704971	1.15183	0.153967	0.00446966	0.0142964	1.84477	-0.0879136	0.105595	0.175332	-0.756139	-0.102929	0.0579923	0.108445	-0.964791	0.1538	0.00451349	0.0122143	1.91313	0.157415	0.00364643	0.0104083	1.98262	0.0630305	0.24628	0.465849	0.331755	0.0845643	0.119592	0.285151	0.544925	0.0583082	0.283518	0.562547	0.249841	0.0691514	0.203294	0.499773
32	GO_ACTIN_NUCLEATION	18	-0.0479797	0.377617	0.488279	-0.311332	-0.0951343	0.0798297	0.15316	-0.814856	-0.02235	0.681182	0.76011	-0.119124	-0.0289124	0.595058	0.69683	-0.156873	0.0210677	0.698553	0.767317	0.115025	0.00249107	0.963481	0.97526	0.0108796	-0.0679491	0.211276	0.299409	-0.523735	-0.0692607	0.202579	0.290429	-0.53696	-0.0948303	0.0808012	0.248576	-0.604541	-0.0955062	0.0786547	0.228635	-0.640857	-0.0835882	0.123933	0.379438	-0.420859	-0.081125	0.135432	0.414319
33	GO_ACTIN_POLYMERIZATION_OR_DEPOLYMERIZATION	29	0.10068	0.0637154	0.115965	0.935673	0.091923	0.0905789	0.168954	0.772233	0.244429	5.47834e-06	5.9483e-05	4.22561	0.230504	1.86115e-05	0.00016556	3.78104	-0.255512	1.96474e-06	3.1085e-05	-4.50745	-0.253051	2.47727e-06	3.7594e-05	-4.42488	0.187155	0.000533369	0.00201606	2.6955	0.175978	0.00113801	0.00395094	2.4033	-0.075821	0.16296	0.370361	-0.431375	-0.122541	0.0238908	0.141181	-0.850224	0.039869	0.463529	0.709876	0.148818	0.0115232	0.832255	0.928922
34	GO_ACTININ_BINDING	18	0.211972	8.48266e-05	0.000398919	3.39911	0.297544	2.60527e-08	3.0372e-06	5.51753	0.269868	4.85384e-07	8.84877e-06	5.05312	0.263911	8.75485e-07	1.77908e-05	4.7498	-0.310207	6.15896e-09	3.69928e-07	-6.43188	-0.305696	1.0374e-08	4.889e-07	-6.31078	0.323326	1.28654e-09	6.40378e-08	7.19356	0.318443	2.32446e-09	1.15701e-07	6.93666	0.100546	0.064069	0.220934	0.655737	0.0495597	0.362097	0.529927	0.275784	0.220854	4.16469e-05	0.0123437	1.90855	0.198605	0.000234625	0.028356
35	GO_ACTION_POTENTIAL	38	0.102405	0.0592874	0.109178	0.961865	0.241024	7.43774e-06	0.000145625	3.83676	0.307267	8.66005e-09	4.12516e-07	6.38456	0.26275	9.80554e-07	1.91495e-05	4.71784	-0.316831	2.81953e-09	2.04762e-07	-6.68875	-0.332794	3.96434e-10	4.39051e-08	-7.35749	0.313605	4.13482e-09	1.58703e-07	6.79941	0.307157	8.77079e-09	3.4083e-07	6.46746	-0.00607974	0.911022	0.956357	-0.0193799	-0.0544413	0.316708	0.487497	-0.312028	0.109477	0.0437063	0.246648	0.607922	0.0786064	0.148021	0.435111
36	GO_ACTIVATING_TRANSCRIPTION_FACTOR_BINDING	42	-0.033701	0.535529	0.641708	-0.192663	0.0884431	0.103506	0.187204	0.727686	0.127631	0.0186084	0.0434099	1.36241	0.0875915	0.106882	0.188191	0.725402	-0.107234	0.0482249	0.095245	-1.02116	-0.100038	0.065431	0.119317	-0.923296	0.123808	0.0224672	0.046531	1.33226	0.117379	0.0305245	0.0608019	1.21608	-0.0238753	0.660736	0.801496	-0.0960988	-0.027075	0.618673	0.746489	-0.126977	0.0384367	0.479753	0.716315	0.144896	0.0189353	0.727787	0.885741
37	GO_ACTIVATION_OF_ADENYLATE_CYCLASE_ACTIVITY	17	0.0603113	0.267282	0.376137	0.424654	0.0724039	0.182801	0.29088	0.536286	0.154112	0.00443198	0.0134018	1.87284	0.137779	0.011031	0.0298882	1.5245	-0.169298	0.00175373	0.00714722	-2.14586	-0.187691	0.000513783	0.00260419	-2.58433	0.12892	0.0174445	0.0378078	1.42242	0.119286	0.0279102	0.0563803	1.24887	-0.0590559	0.277381	0.494885	-0.305496	-0.0975668	0.0723954	0.219191	-0.659178	0.0261988	0.630076	0.810464	0.0912662	0.00729978	0.893264	0.95846
38	GO_ACTIVATION_OF_CYSTEINE_TYPE_ENDOPEPTIDASE_ACTIVITY	78	-0.199527	0.00021916	0.000898963	-3.04626	-0.150748	0.00538597	0.0187873	-1.72614	-0.144162	0.00780471	0.0212637	-1.67236	-0.125296	0.0208891	0.0498591	-1.30226	0.177999	0.000995445	0.00458401	2.33875	0.157489	0.00363033	0.0122486	1.91191	-0.169027	0.00178418	0.00559767	-2.25199	-0.163131	0.0025794	0.00779124	-2.10839	-0.0920775	0.0900365	0.263569	-0.579106	-0.0371382	0.494725	0.649565	-0.187377	-0.144358	0.00772087	0.106996	-0.970633	-0.134869	0.0128585	0.152716
39	GO_ACTIVATION_OF_GTPASE_ACTIVITY	56	0.0994488	0.0670396	0.120579	0.918729	0.241188	7.32979e-06	0.000145625	3.83676	0.26399	8.68735e-07	1.33628e-05	4.8741	0.243323	6.05343e-06	7.44908e-05	4.1279	-0.295068	3.42748e-08	1.29776e-06	-5.88681	-0.317424	2.62656e-09	1.71112e-07	-6.76672	0.290364	5.73132e-08	1.16338e-06	5.93428	0.281525	1.46997e-07	2.78289e-06	5.5555	0.0465163	0.39235	0.603511	0.219315	-0.00607516	0.911089	0.9499	-0.0223223	0.154873	0.00423866	0.0819968	1.0862	0.121556	0.0250503	0.199504
40	GO_ACTIVATION_OF_IMMUNE_RESPONSE	256	-0.114901	0.0341854	0.0689624	-1.16139	-0.160063	0.00307995	0.0122504	-1.91185	-0.117483	0.0303264	0.0646517	-1.18942	-0.0903852	0.0961345	0.172909	-0.762181	0.139962	0.00976599	0.0274513	1.56144	0.147143	0.0065679	0.0193895	1.71243	-0.161967	0.00274158	0.00801663	-2.09601	-0.170592	0.00159318	0.00520372	-2.28369	-0.0942533	0.0826684	0.251222	-0.599943	-0.0599771	0.270095	0.441195	-0.355369	-0.101032	0.0627658	0.283654	-0.547211	-0.102845	0.0581706	0.285707
41	GO_ACTIVATION_OF_INNATE_IMMUNE_RESPONSE	157	-0.129549	0.0168458	0.0379588	-1.42069	-0.19101	0.000397504	0.00260375	-2.5844	-0.13908	0.0102418	0.0264555	-1.57748	-0.0980997	0.0708298	0.135248	-0.868868	0.200184	0.000202973	0.00134205	2.87223	0.211031	8.8132e-05	0.000657441	3.18214	-0.186512	0.000546576	0.002058	-2.68655	-0.199031	0.000221226	0.000994106	-3.00257	-0.113551	0.0363633	0.160447	-0.794667	-0.0474901	0.382694	0.548652	-0.260703	-0.144075	0.00779736	0.106996	-0.970633	-0.136445	0.0117876	0.145053
42	GO_ACTIVATION_OF_JUN_KINASE_ACTIVITY	24	-0.0501706	0.356204	0.467967	-0.329785	0.0815664	0.133313	0.228462	0.641186	0.125901	0.0202759	0.046661	1.33105	0.0924592	0.0887077	0.161652	0.79142	-0.0994039	0.0671634	0.12368	-0.907699	-0.131012	0.0156907	0.0387806	-1.41139	0.127811	0.0184415	0.0395622	1.40272	0.117788	0.0299465	0.059839	1.22302	-0.0838206	0.122889	0.311796	-0.506129	-0.0824195	0.12929	0.296053	-0.52863	0.00363172	0.946779	0.974723	0.0111189	-0.0125225	0.817952	0.922522
43	GO_ACTIVATION_OF_MAPK_ACTIVITY	92	-0.0847512	0.118775	0.193233	-0.713919	-0.0562503	0.300877	0.422735	-0.373931	0.0485652	0.371818	0.476469	0.321966	0.0486001	0.371475	0.489335	0.310394	-0.042589	0.433572	0.53174	-0.274301	-0.0415128	0.445289	0.541616	-0.266309	0.00508655	0.925512	0.944704	0.0247042	-0.00666045	0.902563	0.926403	-0.0332	-0.149891	0.00565697	0.0589656	-1.2294	-0.128255	0.0180367	0.131596	-0.880757	-0.0750055	0.167541	0.441265	-0.3553	-0.0839894	0.122134	0.399302
44	GO_ACTIVATION_OF_MAPKK_ACTIVITY	40	0.0851707	0.116956	0.191045	0.718863	0.165875	0.00217601	0.0093318	2.03003	0.216147	6.09356e-05	0.000395282	3.40309	0.20936	0.000104004	0.000635503	3.19688	-0.219545	4.6332e-05	0.000421459	-3.37524	-0.209509	0.000102807	0.000741749	-3.12974	0.225604	2.81341e-05	0.000171672	3.7653	0.216298	6.02002e-05	0.000341906	3.46609	-0.0415232	0.445175	0.646583	-0.189375	-0.0394351	0.468411	0.627285	-0.202535	0.0306741	0.57281	0.780304	0.107736	0.00537507	0.9213	0.966099
45	GO_ACTIVATION_OF_PROTEIN_KINASE_ACTIVITY	202	0.00720666	0.894617	0.930318	0.0313686	0.0169789	0.754962	0.828047	0.0819448	0.124384	0.0218446	0.0494996	1.3054	0.113501	0.0364929	0.0784775	1.10525	-0.105656	0.0516319	0.100585	-0.997468	-0.0988503	0.0687062	0.123626	-0.907889	0.0824912	0.128956	0.198154	0.702998	0.070733	0.19313	0.279688	0.553325	-0.132078	0.0148574	0.0960056	-1.0177	-0.127366	0.018856	0.131904	-0.879743	-0.0489863	0.367682	0.639259	-0.194323	-0.0673189	0.215549	0.512738
46	GO_ACTIVE_ION_TRANSMEMBRANE_TRANSPORTER_ACTIVITY	90	-0.160829	0.00296923	0.00855246	-2.06791	-0.0369346	0.497096	0.615031	-0.211103	0.0789795	0.146101	0.227978	0.642107	0.0396531	0.465954	0.580314	0.236337	-0.129295	0.0171173	0.0423158	-1.3735	-0.0990738	0.0680798	0.122733	-0.91104	0.0126342	0.816356	0.856778	0.0671319	0.0130223	0.810821	0.85671	0.0671661	-0.1115	0.0399425	0.169157	-0.77171	-0.1222	0.024287	0.142367	-0.84659	-0.0563203	0.300276	0.579365	-0.237048	-0.0873222	0.107968	0.376781
47	GO_ACTIVE_TRANSMEMBRANE_TRANSPORTER_ACTIVITY	191	-0.239691	8.37302e-06	5.27631e-05	-4.27767	-0.121743	0.0248262	0.0616589	-1.21	0.0139834	0.797151	0.854848	0.0681109	-0.0349799	0.520151	0.631653	-0.199521	-0.0583344	0.283301	0.383185	-0.416592	-0.0481714	0.375712	0.47365	-0.324543	-0.0726131	0.181538	0.26423	-0.578018	-0.0723771	0.182964	0.267414	-0.572816	-0.163368	0.00254205	0.0428355	-1.3682	-0.178468	0.000964792	0.0564122	-1.24863	-0.108857	0.0449181	0.247624	-0.606207	-0.131278	0.0154788	0.165553
48	GO_ACTOMYOSIN	47	0.275116	2.54985e-07	2.40849e-06	5.61826	0.191753	0.00037685	0.00251044	2.60025	0.217435	5.27667e-05	0.000353218	3.45196	0.19673	0.000262344	0.00134047	2.87274	-0.230642	1.74523e-05	0.000188112	-3.72558	-0.266378	6.22759e-07	1.257e-05	-4.90067	0.214468	6.7052e-05	0.000352779	3.4525	0.217257	5.35367e-05	0.000308812	3.51031	0.0328075	0.546592	0.720227	0.142531	-0.0129657	0.811722	0.88439	-0.0533561	0.138845	0.010372	0.12648	0.897979	0.126482	0.0196478	0.181477
49	GO_ACTOMYOSIN_STRUCTURE_ORGANIZATION	49	0.22804	2.29354e-05	0.00012809	3.89249	0.197731	0.000250206	0.00184121	2.7349	0.177876	0.00100365	0.00395793	2.40253	0.175321	0.00118827	0.00475951	2.32244	-0.211878	8.5455e-05	0.000674805	-3.17082	-0.244138	5.62415e-06	7.25912e-05	-4.13912	0.190102	0.000433651	0.00169407	2.77107	0.199007	0.000227764	0.00101816	2.99219	0.0723349	0.18322	0.396126	0.402166	0.033981	0.532143	0.68079	0.166987	0.144083	0.00783873	0.107178	0.969895	0.126396	0.0197856	0.181847
50	GO_ACUTE_INFLAMMATORY_RESPONSE	31	-0.0883023	0.104058	0.1733	-0.761201	-0.0816828	0.132758	0.228219	-0.641648	-0.0441956	0.416415	0.518908	-0.284909	-0.0286187	0.598806	0.700293	-0.15472	0.0253329	0.641432	0.720473	0.142383	0.0431148	0.427913	0.525112	0.279748	-0.0675757	0.213801	0.302021	-0.519963	-0.0739012	0.173898	0.256022	-0.591723	-0.0664341	0.221653	0.440317	-0.356234	-0.0291231	0.592377	0.726038	-0.139041	-0.0473385	0.38403	0.65458	-0.184038	-0.0545543	0.315704	0.614951
51	GO_ACUTE_PHASE_RESPONSE	15	-0.18714	0.000533926	0.00197272	-2.70493	-0.0988671	0.0686589	0.135785	-0.867147	-0.104481	0.0542979	0.102488	-0.989326	-0.0978639	0.0715275	0.136277	-0.865577	0.0701987	0.196521	0.287323	0.541629	0.0806432	0.137774	0.214908	0.667747	-0.102034	0.0602161	0.105856	-0.975284	-0.10551	0.0519576	0.0948382	-1.02302	-0.0732091	0.177973	0.388576	-0.410524	-0.0388755	0.47475	0.632715	-0.198792	-0.0600973	0.268985	0.552754	-0.257468	-0.0675919	0.213691	0.510323
52	GO_ACYL_COA_DEHYDROGENASE_ACTIVITY	15	-0.151958	0.00502337	0.013528	-1.86877	0.000771837	0.988683	0.992492	0.00327316	-0.0465083	0.392431	0.495855	-0.304645	-0.0771122	0.1559	0.251438	-0.599569	-0.00360089	0.94723	0.963101	-0.0163282	-0.0050264	0.92639	0.949319	-0.0225877	-0.0437141	0.421514	0.521013	-0.283152	-0.0446331	0.411813	0.514766	-0.28839	0.0322068	0.55378	0.725168	0.139561	-0.0235077	0.665641	0.782514	-0.106508	0.0652837	0.229772	0.513307	0.289622	0.0476762	0.380644	0.669489
53	GO_ACYLGLYCEROL_O_ACYLTRANSFERASE_ACTIVITY	22.5	0.00264922	0.961164	0.975477	0.0107829	0.04641	0.393433	0.515349	0.287899	0.172363	0.00144074	0.00536796	2.27019	0.161863	0.00278788	0.00976308	2.01041	-0.171874	0.00148697	0.00626906	-2.2028	-0.186329	0.000564944	0.00279944	-2.55293	0.127283	0.0189332	0.0404603	1.39297	0.123594	0.0227021	0.0474836	1.32346	-0.137514	0.0111872	0.0827366	-1.0823	-0.14744	0.00650054	0.0899919	-1.0458	-0.0386544	0.477267	0.714288	-0.146126	-0.0540191	0.32048	0.618967
54	GO_ADA2_GCN5_ADA3_TRANSCRIPTION_ACTIVATOR_COMPLEX	15	0.230048	1.93472e-05	0.000111021	3.9546	0.0997177	0.0663013	0.132397	0.878122	0.110043	0.0426254	0.0847533	1.07184	0.131901	0.0149935	0.0383051	1.41674	-0.0556101	0.306419	0.405326	-0.392196	-0.112397	0.0383635	0.0788266	-1.10333	0.123441	0.0228711	0.047191	1.32614	0.127789	0.0184615	0.0401495	1.39632	0.0382059	0.482396	0.675067	0.170653	0.052894	0.330674	0.502189	0.299133	0.0296873	0.585224	0.787289	0.103866	0.0238042	0.661684	0.849395
55	GO_ADAPTIVE_IMMUNE_RESPONSE	107	-0.198958	0.000228592	0.000935054	-3.02916	-0.201341	0.000191508	0.00148578	-2.82805	-0.143745	0.00798624	0.0216518	-1.66451	-0.134126	0.0133662	0.0348717	-1.45753	0.171758	0.00149819	0.00630292	2.20046	0.162599	0.00266508	0.00961424	2.01709	-0.197109	0.000261873	0.00110275	-2.95752	-0.204809	0.000147484	0.000716399	-3.14484	-0.139441	0.0100932	0.0785817	-1.10468	-0.0956192	0.0783005	0.228389	-0.641325	-0.14577	0.0071383	0.104365	-0.981444	-0.149992	0.0056244	0.102959
56	GO_ADAPTIVE_IMMUNE_RESPONSE_BASED_ON_SOMATIC_RECOMBINATION_OF_IMMUNE_RECEPTORS_BUILT_FROM_IMMUNOGLOBULIN_SUPERFAMILY_DOMAINS	66	-0.227637	2.3727e-05	0.000131883	-3.87981	-0.2003	0.000206957	0.00158619	-2.79964	-0.182628	0.000728789	0.00305443	-2.51507	-0.167612	0.00195134	0.00720972	-2.14208	0.186417	0.00056148	0.00293667	2.53215	0.18793	0.000505262	0.00256687	2.5906	-0.21964	4.59771e-05	0.000260792	-3.58371	-0.229867	1.96473e-05	0.000131875	-3.87984	-0.121829	0.0247245	0.129086	-0.889122	-0.0743506	0.17129	0.343355	-0.464257	-0.11551	0.0332885	0.222425	-0.652816	-0.114467	0.0349213	0.226321
57	GO_ADENYLATE_CYCLASE_ACTIVATING_G_PROTEIN_COUPLED_RECEPTOR_SIGNALING_PATHWAY	25	-0.071855	0.186149	0.280108	-0.552674	0.0204268	0.707295	0.791042	0.101801	-0.00736512	0.892314	0.924883	-0.033913	-0.0040326	0.940914	0.95888	-0.0182358	-0.0522999	0.33614	0.435028	-0.361482	-0.0813427	0.134384	0.210807	-0.676115	-0.000315696	0.995372	0.996047	-0.00172024	-0.0036134	0.947047	0.96093	-0.0173084	-0.0552153	0.309869	0.527123	-0.278088	-0.0652675	0.229887	0.404166	-0.39344	0.0495804	0.361895	0.633675	0.198134	0.0306591	0.572997	0.802497
58	GO_ADENYLATE_CYCLASE_INHIBITING_G_PROTEIN_COUPLED_RECEPTOR_SIGNALING_PATHWAY	24	-0.00440844	0.935419	0.961686	-0.0169666	-0.0220975	0.68459	0.771687	-0.112559	0.124433	0.0217925	0.0494069	1.30621	0.125103	0.0210887	0.0502814	1.29859	-0.102818	0.058264	0.110115	-0.958154	-0.101144	0.0624964	0.115118	-0.938857	0.0767144	0.15805	0.23519	0.628581	0.0639018	0.2398	0.331973	0.478897	-0.145506	0.00724437	0.0668235	-1.17507	-0.125647	0.0205315	0.134742	-0.870498	-0.084651	0.119212	0.374547	-0.426494	-0.0951502	0.0797793	0.329993
59	GO_ADENYLATE_CYCLASE_MODULATING_G_PROTEIN_COUPLED_RECEPTOR_SIGNALING_PATHWAY	47	-0.0271275	0.617992	0.713316	-0.146718	-0.0232659	0.668876	0.75919	-0.119649	0.0254205	0.640279	0.725617	0.139293	0.0372854	0.493016	0.606683	0.217038	-0.0493389	0.364241	0.465413	-0.332162	-0.0662296	0.223081	0.313431	-0.503857	0.00685677	0.899706	0.924113	0.034275	0.00169603	0.975133	0.982674	0.00759032	-0.104185	0.0549861	0.20212	-0.694391	-0.084212	0.121145	0.286837	-0.542364	-0.0362247	0.505405	0.734081	-0.134256	-0.0450062	0.407912	0.693283
60	GO_ADENYLYLTRANSFERASE_ACTIVITY	20	-0.0970233	0.0740054	0.131138	-0.882273	-0.0605141	0.265675	0.386515	-0.412833	-0.106712	0.0493294	0.0951783	-1.02146	-0.142323	0.00863455	0.0245578	-1.60981	0.101095	0.0626244	0.117008	0.931784	0.124863	0.0213378	0.0489774	1.31	-0.111795	0.0394168	0.0747213	-1.12656	-0.10978	0.0431239	0.0815012	-1.08884	-0.0356654	0.512004	0.695334	-0.157807	-0.0221198	0.684289	0.796479	-0.0988258	-0.0401911	0.459922	0.706756	-0.150731	-0.0413937	0.446596	0.712175
61	GO_ADHERENS_JUNCTION_ASSEMBLY	29	0.0308008	0.571225	0.672343	0.172409	0.0906456	0.0951651	0.175221	0.756414	0.247543	4.12638e-06	4.65136e-05	4.33242	0.175664	0.00116179	0.00467461	2.33025	-0.245633	4.91209e-06	6.56548e-05	-4.18273	-0.238752	9.0987e-06	0.000105793	-3.97554	0.18743	0.000523251	0.0019897	2.70121	0.178184	0.000983273	0.0034931	2.45679	-0.119746	0.0273081	0.135319	-0.868642	-0.173312	0.00135481	0.0617074	-1.20966	0.0460604	0.397009	0.66044	0.180167	0.0157124	0.772719	0.900827
62	GO_ADHERENS_JUNCTION_ORGANIZATION	51	0.141696	0.00893481	0.0219774	1.65802	0.129889	0.0166119	0.044891	1.34784	0.274515	3.03445e-07	6.11029e-06	5.21394	0.241678	7.01557e-06	8.07246e-05	4.09299	-0.247321	4.21109e-06	5.81157e-05	-4.23571	-0.250287	3.20476e-06	4.60944e-05	-4.33635	0.234431	1.32786e-05	8.99449e-05	4.04602	0.226041	2.71267e-05	0.000172908	3.76218	-0.0895834	0.0991181	0.275294	-0.560204	-0.107992	0.0466561	0.179965	-0.744811	0.0253042	0.64181	0.818642	0.0869058	-0.000409428	0.993998	0.995796
63	GO_ADIPOSE_TISSUE_DEVELOPMENT	24	-0.0633294	0.244043	0.349761	-0.456228	0.0984284	0.0699016	0.137797	0.86076	0.0974502	0.0727385	0.130089	0.885758	0.120431	0.0264343	0.0605188	1.21811	-0.129419	0.0170109	0.0421231	-1.37548	-0.137979	0.0109139	0.0289203	-1.5388	0.100819	0.0633489	0.110574	0.956349	0.085639	0.114951	0.183178	0.737128	-0.00602509	0.911819	0.95674	-0.0192061	-0.0265325	0.625723	0.753043	-0.12318	0.0493972	0.363674	0.636034	0.19652	0.0152874	0.778705	0.903709
64	GO_ADP_BINDING	26	0.0488495	0.369023	0.480815	0.318022	-0.172409	0.00143651	0.00681667	-2.16643	-0.0192593	0.723319	0.795507	-0.0993558	-0.0128086	0.813868	0.870038	-0.0604619	0.0310054	0.568671	0.657375	0.182187	0.0826344	0.128292	0.203703	0.691002	-0.0898655	0.0980557	0.159525	-0.797171	-0.084263	0.120919	0.190563	-0.719961	-0.160355	0.00305578	0.0465824	-1.33178	-0.126865	0.0193312	0.133599	-0.874196	-0.193578	0.000338394	0.0254082	-1.59503	-0.181939	0.000763759	0.0400693
65	GO_ADP_METABOLIC_PROCESS	33	-0.0832087	0.125653	0.202711	-0.693123	-0.185916	0.000581343	0.00346149	-2.46074	-0.0165117	0.761497	0.82743	-0.0822685	-0.0426409	0.433011	0.549639	-0.259923	0.103804	0.0558841	0.106802	0.971422	0.0766304	0.158507	0.240063	0.619675	-0.121344	0.0253057	0.0512828	-1.29003	-0.124009	0.0222484	0.046689	-1.33079	-0.190338	0.000426475	0.0211367	-1.67496	-0.165346	0.00224897	0.0711637	-1.14774	-0.172551	0.00142335	0.050045	-1.30064	-0.170001	0.00167685	0.055042
66	GO_ADRENERGIC_RECEPTOR_BINDING	16	-0.0483164	0.374275	0.48509	-0.314177	0.0446777	0.411346	0.534388	0.272144	0.0420034	0.439925	0.540152	0.267484	0.0279284	0.607654	0.707466	0.150294	-0.0739788	0.173446	0.260121	-0.584825	-0.105179	0.0527011	0.100577	-0.997502	0.039847	0.463775	0.563215	0.249325	0.0392437	0.470574	0.572113	0.242518	-0.0414975	0.445457	0.646583	-0.189375	-0.0685484	0.207269	0.382266	-0.417634	0.0167404	0.758296	0.885129	0.0529933	-0.00380392	0.94426	0.973939
67	GO_ADULT_BEHAVIOR	66	-0.0577299	0.288326	0.397908	-0.400217	0.135335	0.012549	0.0357735	1.44644	0.173073	0.00137601	0.00516586	2.28686	0.13212	0.014826	0.0379211	1.42112	-0.196547	0.000272871	0.00165819	-2.78037	-0.233959	1.3833e-05	0.0001491	-3.82652	0.159738	0.00317199	0.0090308	2.04427	0.157602	0.00360602	0.0103329	1.98578	-0.0147782	0.785894	0.881842	-0.0546092	-0.06689	0.218493	0.394768	-0.403658	0.10786	0.0469259	0.251934	0.598713	0.0716504	0.187407	0.483071
68	GO_ADULT_LOCOMOTORY_BEHAVIOR	44	-0.0357918	0.510509	0.618587	-0.208599	0.112836	0.0376106	0.0854874	1.0681	0.162753	0.00264007	0.00881351	2.05485	0.122679	0.0237314	0.0553024	1.25726	-0.169838	0.00169439	0.00695658	-2.1576	-0.200292	0.000207079	0.00127411	-2.89479	0.138698	0.0105032	0.0246578	1.60805	0.134342	0.0132169	0.0304277	1.51673	-0.00741427	0.8916	0.946057	-0.0240828	-0.0543855	0.317206	0.487924	-0.311648	0.0948559	0.0807189	0.312301	0.505427	0.06431	0.236806	0.533325
69	GO_AEROBIC_RESPIRATION	48	0.126924	0.0192204	0.0424459	1.37216	-0.0177718	0.744035	0.818901	-0.0867687	-0.0296672	0.585657	0.676874	-0.169492	0.0118151	0.828158	0.879939	0.0555476	0.0605437	0.265588	0.36392	0.438994	0.0579812	0.286387	0.383756	0.415945	-0.0323228	0.552537	0.641945	-0.192502	-0.029102	0.592821	0.678254	-0.168608	0.0393356	0.469728	0.666313	0.176321	0.0527554	0.332119	0.503176	0.29828	0.0037566	0.944979	0.974681	0.0111373	0.00508808	0.925527	0.966099
70	GO_AGGRESOME	28	0.133217	0.014011	0.032378	1.48975	0.19677	0.000268458	0.00195603	2.70862	0.139183	0.0102339	0.0264506	1.57757	0.146826	0.00672882	0.0200867	1.69709	-0.136212	0.0119841	0.0323115	-1.49064	-0.134958	0.012799	0.0329457	-1.4822	0.199725	0.000215981	0.000946384	3.02393	0.199348	0.000222082	0.000995774	3.00184	0.126855	0.0193405	0.110553	0.956429	0.107298	0.0480905	0.182224	0.739394	0.144408	0.00769926	0.106996	0.970633	0.12205	0.0244626	0.198479
71	GO_AGING	189	-0.189112	0.000465052	0.00175484	-2.75576	-0.110869	0.041086	0.0917008	-1.03763	-0.0960451	0.0769768	0.136131	-0.866044	-0.0864567	0.111516	0.194341	-0.711435	0.118964	0.0283366	0.0624844	1.20423	0.0816403	0.13296	0.209093	0.679661	-0.12696	0.0192402	0.0410174	-1.38703	-0.132911	0.0142345	0.0324545	-1.48873	-0.151548	0.0051438	0.0561959	-1.2503	-0.113952	0.0357515	0.162937	-0.78798	-0.113303	0.0368223	0.228612	-0.640901	-0.117404	0.0304884	0.212917
72	GO_ALCOHOL_BINDING	50	-0.113874	0.0358796	0.0715341	-1.14549	-0.0408222	0.452902	0.5739	-0.241163	0.0786253	0.147923	0.230285	0.637735	0.0451927	0.40597	0.525483	0.279441	-0.114328	0.0351429	0.0738884	-1.13142	-0.117302	0.0306347	0.0655929	-1.18314	0.0232323	0.669325	0.739798	0.130887	0.0145928	0.788516	0.838685	0.076401	-0.171425	0.00153067	0.0345962	-1.46097	-0.185674	0.000591198	0.0513531	-1.28943	-0.0676056	0.213598	0.494119	-0.306169	-0.0974636	0.0726989	0.319499
73	GO_ALCOHOL_BIOSYNTHETIC_PROCESS	80	-0.262479	9.18354e-07	7.3568e-06	-5.13331	-0.242508	6.10132e-06	0.000132494	-3.8778	-0.180709	0.000815597	0.00335254	-2.47463	-0.20736	0.000117451	0.000705979	-3.15121	0.166327	0.00209042	0.00817679	2.08742	0.172669	0.00139265	0.00573368	2.24157	-0.249296	3.26284e-06	2.85096e-05	-4.54501	-0.253219	2.25379e-06	2.37157e-05	-4.62496	-0.129575	0.0168243	0.103229	-0.986197	-0.141831	0.00882273	0.099185	-1.00355	-0.105264	0.0524756	0.263867	-0.578614	-0.104932	0.0532281	0.271273
74	GO_ALCOHOL_CATABOLIC_PROCESS	36	-0.1745	0.0012539	0.00413611	-2.38341	-0.114169	0.0353996	0.0816208	-1.0882	-0.0750394	0.167349	0.25415	-0.594909	-0.0955923	0.0783846	0.145717	-0.836489	0.0519094	0.339765	0.438566	0.357965	0.0164797	0.761947	0.818086	0.087201	-0.116729	0.0314628	0.0617952	-1.20904	-0.117456	0.0304146	0.0606104	-1.21745	-0.038114	0.483451	0.675611	-0.170303	-0.0617585	0.255956	0.426652	-0.369926	-0.0175452	0.747063	0.879171	-0.0559267	-0.0296375	0.585853	0.809523
75	GO_ALCOHOL_METABOLIC_PROCESS	232	-0.25435	2.02349e-06	1.48411e-05	-4.82853	-0.188885	0.00046245	0.00291754	-2.53498	-0.136149	0.011973	0.0299337	-1.52384	-0.1785	0.000946882	0.00394939	-2.40347	0.0991581	0.0678269	0.124569	0.904589	0.085244	0.116674	0.188224	0.725324	-0.198205	0.000235235	0.00101371	-2.99409	-0.200271	0.000201657	0.000924781	-3.03396	-0.108326	0.0459381	0.183109	-0.737291	-0.133662	0.0136397	0.117751	-0.929034	-0.0594107	0.274653	0.558068	-0.253313	-0.0692623	0.202677	0.498812
76	GO_ALDITOL_PHOSPHATE_METABOLIC_PROCESS	20	-0.0904707	0.0958074	0.162181	-0.790001	-0.0730408	0.178974	0.286436	-0.542973	0.0717173	0.186995	0.277526	0.556697	0.0609543	0.262208	0.375606	0.425267	-0.0606289	0.264768	0.363021	-0.440068	-0.0376139	0.489212	0.582896	-0.234409	0.0130406	0.81056	0.852412	0.0693502	0.00491191	0.928062	0.944913	0.0246083	-0.0774316	0.15419	0.357623	-0.446575	-0.0862167	0.112516	0.276701	-0.557989	-0.0820372	0.131081	0.388267	-0.410869	-0.0854079	0.115937	0.387039
77	GO_ALDO_KETO_REDUCTASE_NADP_ACTIVITY	15	-0.151798	0.00507011	0.0136125	-1.86606	-0.128997	0.0173766	0.0465125	-1.33243	-0.236205	1.13789e-05	0.000109109	-3.96214	-0.237762	9.92764e-06	0.000102278	-3.99022	0.126748	0.0194437	0.0467366	1.33034	0.133476	0.0138246	0.0349161	1.45697	-0.232329	1.59206e-05	0.000104178	-3.98222	-0.220853	4.165e-05	0.000249001	-3.6038	0.053951	0.321091	0.536363	0.270541	0.0328492	0.545896	0.692136	0.159809	0.0479152	0.378258	0.648987	0.187764	0.0487826	0.369679	0.66208
78	GO_ALPHA_AMINO_ACID_BIOSYNTHETIC_PROCESS	58	0.00229139	0.966407	0.97878	0.00931506	-0.0884363	0.103532	0.187204	-0.727686	-0.0977598	0.0718307	0.128778	-0.890159	-0.0825496	0.128685	0.217172	-0.663196	0.0863596	0.111919	0.183615	0.736091	0.0861001	0.113004	0.183979	0.735231	-0.105105	0.0528682	0.0950786	-1.02192	-0.105971	0.0509367	0.0935916	-1.02876	-0.000927547	0.9864	0.994487	-0.0024009	-0.00544926	0.920217	0.954251	-0.0203373	-0.00884101	0.870907	0.941544	-0.0261592	-0.00244069	0.964219	0.982182
79	GO_ALPHA_AMINO_ACID_CATABOLIC_PROCESS	53	-0.0349531	0.520472	0.628425	-0.201747	0.040268	0.459063	0.579387	0.237031	0.0078295	0.885569	0.919183	0.0365981	0.0131856	0.808493	0.86704	0.0619611	-0.0297307	0.584676	0.671303	-0.173081	-0.0372423	0.493516	0.587392	-0.231072	0.0165801	0.76054	0.814487	0.089116	0.021151	0.697419	0.766072	0.115731	0.0784635	0.148761	0.351191	0.454456	0.0773821	0.154453	0.326601	0.485983	0.0330784	0.543096	0.761848	0.118132	0.0259338	0.633543	0.831337
80	GO_ALPHA_AMINO_ACID_METABOLIC_PROCESS	154	0.00754586	0.889688	0.927312	0.0327743	-0.0145049	0.78976	0.855074	-0.0679964	-0.0537068	0.32329	0.427897	-0.36866	-0.0306597	0.57299	0.678049	-0.168739	0.00485634	0.928874	0.950326	0.0221275	-0.0292974	0.590163	0.674086	-0.171284	-0.0396342	0.466167	0.56495	-0.24799	-0.0298632	0.583002	0.670483	-0.173612	0.0438637	0.419926	0.627527	0.202368	0.0448599	0.409439	0.573628	0.241369	0.0294119	0.58871	0.789103	0.102866	0.0275883	0.612036	0.820337
81	GO_ALPHA_BETA_T_CELL_ACTIVATION	28	-0.100934	0.063045	0.114934	-0.939552	-0.0282395	0.603659	0.706488	-0.150895	0.076279	0.160429	0.245682	0.609626	0.0521472	0.337554	0.454933	0.342052	-0.0665236	0.22103	0.315452	-0.501067	-0.0669052	0.218388	0.308402	-0.510883	0.0396968	0.465463	0.564468	0.248361	0.0312108	0.566111	0.657026	0.182417	-0.161809	0.0027971	0.0447333	-1.34937	-0.130523	0.0160855	0.126594	-0.897588	-0.0940218	0.0834304	0.316857	-0.499136	-0.116424	0.0319105	0.216815
82	GO_ALPHA_BETA_T_CELL_DIFFERENTIATION	21	-0.152531	0.00485943	0.0131424	-1.88132	-0.116149	0.0323201	0.0757728	-1.12049	0.00696454	0.898138	0.928964	0.0320011	0.00136751	0.979949	0.986182	0.006043	0.00471071	0.931001	0.951843	0.0214346	0.0102543	0.850496	0.890498	0.0503669	-0.0479094	0.378316	0.478086	-0.320494	-0.0572496	0.292361	0.391879	-0.406848	-0.203222	0.000166294	0.0158576	-1.79976	-0.154239	0.00439915	0.0804187	-1.09464	-0.157931	0.00353582	0.0737279	-1.13237	-0.171212	0.00155172	0.0541269
83	GO_ALPHA_TUBULIN_BINDING	18	-0.010541	0.846368	0.895702	-0.0478365	0.0243226	0.654788	0.748957	0.125543	0.0738661	0.174103	0.262339	0.581137	0.0728873	0.179891	0.280014	0.552821	-0.0832463	0.125482	0.200753	-0.697337	-0.0581802	0.284577	0.382023	-0.417911	0.0497773	0.35999	0.462636	0.334761	0.040253	0.45923	0.561056	0.250994	-0.0420165	0.439782	0.642558	-0.192088	-0.0728164	0.180316	0.354864	-0.449938	0.00724879	0.894005	0.952409	0.0211763	1.25179e-05	0.999819	0.999942
84	GO_AMEBOIDAL_TYPE_CELL_MIGRATION	109	-0.00123286	0.981923	0.988393	-0.00507032	0.0336066	0.536673	0.649154	0.187652	0.125503	0.0206781	0.0472672	1.32544	0.0978269	0.0716349	0.136374	0.865268	-0.160234	0.0030783	0.0109533	-1.96046	-0.179289	0.000913251	0.00411567	-2.38556	0.0783725	0.149233	0.224103	0.649552	0.0735156	0.17616	0.258778	0.587072	-0.0979915	0.0711572	0.232297	-0.633957	-0.123339	0.0229853	0.14052	-0.852263	-0.0097368	0.857959	0.938618	-0.027511	-0.0357994	0.510419	0.758523
85	GO_AMIDE_BINDING	170	-0.11786	0.0297951	0.0614203	-1.21169	-0.130908	0.0157209	0.0429899	-1.36663	-0.0462459	0.395299	0.498768	-0.302102	-0.065508	0.228299	0.338815	-0.470037	0.0534921	0.325402	0.424979	0.371632	0.0232708	0.668964	0.740322	0.130579	-0.101398	0.0618153	0.108314	-0.965316	-0.103177	0.0573596	0.102626	-0.988741	-0.103484	0.0566183	0.205589	-0.687	-0.093573	0.0849196	0.237412	-0.624498	-0.0999339	0.0656928	0.28871	-0.539539	-0.103965	0.0554723	0.277467
86	GO_AMIDE_BIOSYNTHETIC_PROCESS	457	0.021258	0.696108	0.778334	0.108834	-0.103914	0.0555941	0.115139	-0.938778	-0.110909	0.0409689	0.0818639	-1.08691	-0.0772677	0.155135	0.250547	-0.601112	0.12827	0.0179694	0.0439195	1.35734	0.151745	0.00504743	0.0157023	1.80404	-0.130211	0.0162896	0.0357618	-1.44658	-0.1338	0.0135422	0.0310678	-1.50769	-0.0347446	0.523154	0.703304	-0.152857	0.00265515	0.961096	0.978097	0.00961819	-0.034362	0.527741	0.750709	-0.124528	-0.0257125	0.636608	0.833631
87	GO_AMIDE_TRANSPORT	50	-0.326498	8.71154e-10	1.73059e-08	-7.76181	-0.184318	0.000649162	0.00375429	-2.42547	-0.101142	0.0625027	0.11513	-0.938812	-0.116932	0.0311664	0.0691027	-1.16051	0.084408	0.120279	0.194326	0.711468	0.0934682	0.0852701	0.146908	0.832956	-0.156692	0.00380683	0.01056	-1.97634	-0.163787	0.00247712	0.00755242	-2.12191	-0.154353	0.00436983	0.0539754	-1.2678	-0.129901	0.0166016	0.127332	-0.895062	-0.17103	0.00156996	0.052345	-1.28113	-0.180807	0.000824625	0.0405899
88	GO_AMINE_METABOLIC_PROCESS	76	-0.202088	0.00018109	0.000761852	-3.11813	-0.108383	0.0458636	0.0994791	-1.00227	-0.076624	0.158541	0.243529	-0.613449	-0.0883423	0.103901	0.184334	-0.734394	0.0380474	0.484215	0.581321	0.235584	0.0207639	0.702692	0.767866	0.114715	-0.110841	0.0411376	0.0772201	-1.11227	-0.105638	0.051672	0.0944335	-1.02487	-0.0345241	0.525606	0.704568	-0.152077	-0.0446358	0.411784	0.575822	-0.239712	-0.0749518	0.167847	0.441518	-0.355052	-0.0815103	0.133581	0.411611
89	GO_AMINO_ACID_ACTIVATION	52	0.125083	0.0210557	0.0458597	1.33857	0.0255329	0.638965	0.735416	0.133467	0.00170702	0.974982	0.9823	0.00775593	0.0133212	0.80666	0.865674	0.0626455	0.0155474	0.775153	0.830279	0.0807761	0.021583	0.691698	0.757908	0.120384	0.00724803	0.894069	0.919602	0.0363999	0.00856501	0.874967	0.905632	0.0430483	0.0614325	0.258622	0.478698	0.319938	0.0704651	0.194928	0.370003	0.431795	0.04984	0.359568	0.631096	0.199905	0.0465145	0.392557	0.680105
90	GO_AMINO_ACID_BINDING	60	-0.0329636	0.544497	0.648769	-0.18791	-0.00800689	0.882995	0.920826	-0.0358225	0.010922	0.840887	0.889264	0.0509692	-0.00484413	0.929052	0.950728	-0.0219438	-0.0218493	0.687946	0.758109	-0.120268	-0.0679091	0.211546	0.30056	-0.522068	-0.0123396	0.820565	0.859973	-0.0655154	-0.00476505	0.930207	0.946444	-0.0239049	-0.0296736	0.585398	0.748214	-0.125974	-0.0498152	0.359624	0.526831	-0.278329	-0.011812	0.828115	0.925093	-0.0338147	-0.0267477	0.622922	0.824976
91	GO_AMINO_ACID_TRANSMEMBRANE_TRANSPORT	40	-0.121213	0.0254656	0.0539258	-1.2682	-0.0193664	0.721843	0.802249	-0.0956908	0.0797071	0.142414	0.223145	0.651412	0.0296946	0.585131	0.688357	0.162186	-0.112051	0.038966	0.0802881	-1.09535	-0.0834005	0.124782	0.199129	-0.700865	0.0218603	0.687797	0.753401	0.122974	0.0169599	0.755227	0.81502	0.088832	-0.0944868	0.0819099	0.249904	-0.602227	-0.113446	0.0365842	0.163961	-0.785258	-5.5262e-05	0.999192	0.999417	-0.000253105	-0.0195292	0.719604	0.88087
92	GO_AMINO_ACID_TRANSMEMBRANE_TRANSPORTER_ACTIVITY	46	-0.175941	0.00114076	0.00380541	-2.4196	-0.0644493	0.235791	0.352414	-0.452947	0.0138476	0.79908	0.856295	0.0673766	-0.0204305	0.707245	0.785828	-0.104673	-0.0532308	0.327601	0.427096	-0.369474	-0.0231517	0.670405	0.740992	-0.130187	-0.0354984	0.513983	0.608484	-0.215751	-0.0404112	0.457467	0.559364	-0.252305	-0.0905861	0.0953833	0.271478	-0.566265	-0.098897	0.0685749	0.215126	-0.667307	-0.0107566	0.843266	0.932984	-0.0301257	-0.0251864	0.643362	0.838263
93	GO_AMINO_ACID_TRANSPORT	78	-0.131659	0.0151806	0.0346293	-1.46056	-0.0292348	0.590957	0.695418	-0.157754	0.106072	0.0507138	0.0971429	1.01259	0.0693282	0.202139	0.307196	0.512585	-0.136506	0.0118	0.0318769	-1.49652	-0.109946	0.0428088	0.085889	-1.06606	0.0390965	0.472241	0.571012	0.243355	0.0331288	0.542482	0.636102	0.196473	-0.117698	0.0300725	0.143	-0.844664	-0.147954	0.00631475	0.0888626	-1.05128	-0.02304	0.671903	0.83651	-0.0775287	-0.0471358	0.386071	0.675472
94	GO_AMINO_SUGAR_METABOLIC_PROCESS	30	-0.241404	7.18934e-06	4.60908e-05	-4.33639	-0.253295	2.42113e-06	7.05632e-05	-4.15142	-0.0155118	0.775542	0.839192	-0.0761387	-0.0503712	0.354282	0.472021	-0.326038	0.0570246	0.294264	0.393834	0.404687	0.111443	0.0400454	0.0816388	1.0881	-0.13737	0.011273	0.0261601	-1.58236	-0.15052	0.00545709	0.0145457	-1.83727	-0.27614	2.56955e-07	0.000569155	-3.24477	-0.261135	1.14705e-06	0.00508143	-2.29401	-0.230822	1.81123e-05	0.00895524	-2.04792	-0.233327	1.46097e-05	0.00913434
95	GO_AMINOGLYCAN_BIOSYNTHETIC_PROCESS	74	0.087354	0.107839	0.178723	0.747819	0.0859163	0.113777	0.201775	0.695134	0.16933	0.00175019	0.00630354	2.20042	0.138127	0.0108285	0.0294477	1.53095	-0.195668	0.000290911	0.00174862	-2.7573	-0.211917	8.51954e-05	0.000641863	-3.19256	0.146814	0.00673343	0.0170063	1.76939	0.141117	0.00922049	0.0225922	1.64604	-0.0780251	0.151049	0.354046	-0.45094	-0.109801	0.0430848	0.173085	-0.761742	0.0538835	0.321698	0.598287	0.22309	0.0300222	0.580996	0.807344
96	GO_AMINOGLYCAN_CATABOLIC_PROCESS	43	0.0508133	0.35007	0.462101	0.335263	0.0944984	0.0818722	0.156536	0.805386	0.141725	0.00892086	0.0235655	1.62772	0.120286	0.026617	0.0608114	1.21602	-0.181554	0.000783975	0.00378123	-2.42237	-0.187266	0.000529274	0.0026636	-2.57453	0.133918	0.0135115	0.0304456	1.51648	0.12989	0.0166106	0.0368293	1.43381	-0.02588	0.634247	0.784836	-0.105221	-0.0567993	0.296179	0.465769	-0.33183	0.0582437	0.284051	0.562547	0.249841	0.0378783	0.486161	0.738624
97	GO_AMINOGLYCAN_METABOLIC_PROCESS	107	0.116995	0.0310762	0.0636172	1.19643	0.116742	0.0314428	0.0741306	1.13	0.205196	0.000143212	0.000789088	3.10287	0.182055	0.00075773	0.00328449	2.48353	-0.217496	5.46832e-05	0.000475927	-3.32246	-0.233752	1.40825e-05	0.000151217	-3.8204	0.18569	0.000590549	0.00218869	2.65981	0.17912	0.000923639	0.00331503	2.47951	-0.0680352	0.210697	0.42816	-0.368394	-0.0979057	0.0714059	0.21742	-0.6627	0.0521442	0.337583	0.614165	0.211715	0.031089	0.567628	0.799861
98	GO_AMINOPEPTIDASE_ACTIVITY	29	-0.029229	0.591031	0.68998	-0.161164	-0.121942	0.0245902	0.061337	-1.21228	0.0035789	0.947552	0.962324	0.0166788	0.00107959	0.98417	0.989306	0.00466918	-0.0160162	0.768448	0.825028	-0.0835313	0.0278997	0.608024	0.689446	0.1615	-0.0709842	0.19155	0.276857	-0.557744	-0.0802319	0.139798	0.21407	-0.669444	-0.126979	0.0192224	0.110553	-0.956429	-0.119349	0.0278273	0.149424	-0.825579	-0.112303	0.038527	0.233754	-0.63124	-0.133751	0.0136289	0.157776
99	GO_AMMONIUM_ION_BINDING	17	-0.0747204	0.169166	0.258862	-0.586932	-0.122419	0.0240317	0.0600792	-1.22128	-0.146883	0.00670729	0.0189377	-1.72267	-0.144211	0.0077838	0.0226559	-1.64482	0.174492	0.00125458	0.00549189	2.26028	0.130873	0.0158017	0.0389763	1.4092	-0.146057	0.00702499	0.0176421	-1.75345	-0.142766	0.00842764	0.0208922	-1.68001	-0.00326565	0.952137	0.977473	-0.00989506	0.038412	0.480036	0.637076	0.195809	-0.0749185	0.168036	0.441518	-0.355052	-0.0578239	0.287541	0.58697
100	GO_AMMONIUM_ION_METABOLIC_PROCESS	103	-0.188543	0.000484027	0.00181561	-2.74098	-0.153407	0.00461833	0.0167561	-1.77583	-0.0706914	0.193392	0.284455	-0.545986	-0.102194	0.0598134	0.117976	-0.928207	0.027747	0.609989	0.692175	0.159784	0.0156129	0.774119	0.828805	0.0815475	-0.135983	0.0121293	0.0278409	-1.55532	-0.133569	0.0137583	0.031482	-1.50194	-0.0879356	0.105508	0.285696	-0.544096	-0.105659	0.0516245	0.189005	-0.723526	-0.086817	0.110028	0.361871	-0.441446	-0.0947851	0.0809463	0.332338
101	GO_AMMONIUM_TRANSPORT	28	-0.157269	0.00367835	0.0103068	-1.98688	-0.078738	0.147342	0.246882	-0.607511	-0.0729959	0.179242	0.268766	-0.570626	-0.123858	0.0224125	0.0526724	-1.27842	0.00585503	0.914298	0.938665	0.0274894	-0.0215723	0.691697	0.757908	-0.120384	-0.119987	0.0269978	0.0540933	-1.26686	-0.106251	0.0503248	0.0926877	-1.03298	-0.0111693	0.837333	0.913642	-0.0392239	-0.0673201	0.215541	0.392295	-0.406388	-0.0122477	0.821879	0.920355	-0.0360446	-0.0227982	0.675149	0.855701
102	GO_ANAPHASE_PROMOTING_COMPLEX	20	0.317938	2.46981e-09	4.35907e-08	7.36061	0.168958	0.00179198	0.00807575	2.09282	0.104842	0.0534666	0.101308	0.994358	0.154054	0.00444713	0.014245	1.84634	-0.0710758	0.190977	0.281634	-0.550316	-0.0890705	0.101073	0.16795	-0.77482	0.155204	0.00415679	0.0114093	1.94274	0.154226	0.00440261	0.0122587	1.91156	0.101368	0.0619162	0.216564	0.664414	0.111087	0.0406879	0.170045	0.769436	0.125388	0.0207949	0.17853	0.74829	0.130985	0.015712	0.165553
103	GO_ANAPHASE_PROMOTING_COMPLEX_DEPENDENT_CATABOLIC_PROCESS	76	0.185101	0.00060311	0.00219358	2.65885	0.0240582	0.658459	0.751797	0.123899	-0.023429	0.666849	0.748232	-0.125964	0.0237836	0.662115	0.751199	0.124245	0.0881854	0.104539	0.174158	0.759057	0.08682	0.110042	0.180017	0.744687	-0.00260819	0.961784	0.972319	-0.0121913	-0.00352872	0.948312	0.961772	-0.0169278	0.0267029	0.623673	0.776468	0.109877	0.0660605	0.22439	0.400335	0.397576	0.00968716	0.858748	0.938712	0.0274675	0.0260121	0.632683	0.830701
104	GO_ANATOMICAL_STRUCTURE_FORMATION_INVOLVED_IN_MORPHOGENESIS	679	0.0176736	0.74613	0.81964	0.0863767	0.076521	0.160418	0.262233	0.581313	0.148139	0.00636277	0.0181735	1.74056	0.130575	0.016306	0.0410197	1.38701	-0.145761	0.00727037	0.0217033	-1.66347	-0.166367	0.00214989	0.00811937	-2.09048	0.129775	0.0169794	0.0370352	1.43138	0.122413	0.0244065	0.0503589	1.29792	-0.090823	0.0955099	0.271572	-0.566115	-0.0759843	0.16338	0.334794	-0.475222	0.0078881	0.885117	0.9474	0.0234664	-0.0211412	0.69855	0.870977
105	GO_ANATOMICAL_STRUCTURE_HOMEOSTASIS	195	0.353564	2.57953e-11	7.8809e-10	9.10342	0.16472	0.00233819	0.00992165	2.00342	0.236492	1.10976e-05	0.000107196	3.96982	0.23821	9.54441e-06	9.90205e-05	4.00428	-0.161042	0.00293101	0.0105478	-1.97684	-0.149924	0.00564622	0.0172264	-1.7638	0.239182	8.75927e-06	6.37168e-05	4.19575	0.233715	1.41275e-05	0.000102096	3.99099	0.0250099	0.64569	0.792356	0.101079	0.0510875	0.347474	0.517415	0.286161	0.0458733	0.398932	0.661481	0.179482	0.04297	0.429466	0.701345
106	GO_ANATOMICAL_STRUCTURE_MATURATION	24	-0.242186	6.70412e-06	4.35473e-05	-4.36104	-0.123675	0.0226126	0.0573733	-1.24129	-0.103361	0.0569441	0.10662	-0.972162	-0.137983	0.0109116	0.0296498	-1.52798	0.0493664	0.363973	0.465206	0.332355	0.0348291	0.521953	0.61333	0.212306	-0.148057	0.00627815	0.0160301	-1.79506	-0.142662	0.00847583	0.0209758	-1.67828	-0.110407	0.04194	0.174291	-0.758726	-0.118641	0.0287715	0.15088	-0.821368	-0.0780437	0.150951	0.418603	-0.378198	-0.0763343	0.160125	0.449543
107	GO_ANCHORED_COMPONENT_OF_MEMBRANE	55	0.0509763	0.348525	0.46061	0.336666	0.0562122	0.301205	0.423063	0.373595	0.100481	0.0642427	0.117747	0.929049	0.0855249	0.115437	0.199483	0.700094	-0.0872392	0.108304	0.178692	-0.747895	-0.118421	0.0290704	0.0628205	-1.2019	0.0984721	0.0697771	0.119806	0.921522	0.0978657	0.0715221	0.123479	0.908407	-0.0633788	0.243675	0.462786	-0.33462	-0.0714343	0.188744	0.363065	-0.440016	0.0336549	0.536088	0.7565	0.121191	0.0291851	0.591589	0.813431
108	GO_ANCHORED_COMPONENT_OF_PLASMA_MEMBRANE	17	-0.213414	7.57204e-05	0.000361322	-3.44211	-0.140455	0.00955674	0.0291573	-1.53525	-0.163965	0.00245017	0.00831745	-2.08001	-0.160616	0.00300796	0.0103457	-1.98524	0.173081	0.0013753	0.00589794	2.2293	0.123169	0.0231757	0.0522806	1.28166	-0.173799	0.00131262	0.00435247	-2.36126	-0.16959	0.00172141	0.00555207	-2.25555	-0.100847	0.063275	0.219334	-0.658895	-0.072382	0.182935	0.357465	-0.446766	-0.0820864	0.13085	0.388254	-0.410884	-0.0779259	0.151571	0.439695
109	GO_ANCHORING_JUNCTION	425	0.182295	0.000731989	0.00258796	2.58704	0.057023	0.294439	0.415932	0.380977	0.15021	0.00551497	0.0161263	1.79247	0.155299	0.00409873	0.0133216	1.87544	-0.135415	0.0124454	0.0332328	-1.47843	-0.153465	0.00456614	0.0145945	-1.83581	0.121593	0.0249534	0.050708	1.29492	0.117029	0.0309767	0.0614816	1.21125	-0.073083	0.178813	0.389489	-0.409505	-0.070797	0.192828	0.36767	-0.434542	0.0268255	0.62208	0.805836	0.0937532	0.0172753	0.750947	0.894033
110	GO_ANDROGEN_RECEPTOR_BINDING	36	0.0513986	0.344543	0.456817	0.340258	0.0382148	0.482295	0.602429	0.220094	0.0772814	0.154992	0.238913	0.62176	0.0906276	0.0952311	0.171633	0.765399	-0.0826442	0.128247	0.204097	-0.690162	-0.072432	0.182631	0.268344	-0.571308	0.0840261	0.121971	0.18959	0.722185	0.0744737	0.170581	0.251975	0.598643	-0.0558727	0.304138	0.522019	-0.282314	-0.0485872	0.371601	0.538323	-0.268957	-0.0166943	0.758941	0.885129	-0.0529933	-0.0271199	0.618091	0.822512
111	GO_ANDROGEN_RECEPTOR_SIGNALING_PATHWAY	38	0.190722	0.000415018	0.00158221	2.80074	0.0381476	0.483065	0.602981	0.219696	-0.00469819	0.931184	0.950933	-0.0218502	0.0227536	0.675748	0.761667	0.118235	0.0213498	0.694718	0.763862	0.116985	0.00432601	0.936624	0.956267	0.0194207	0.0243202	0.65482	0.728907	0.137328	0.0273581	0.615009	0.697692	0.156336	0.00185784	0.972761	0.988035	0.00522757	0.0339776	0.532184	0.68079	0.166987	0.0133285	0.806459	0.912778	0.0396349	0.0205642	0.705418	0.873149
112	GO_ANGIOGENESIS	220	-0.092272	0.0893573	0.153184	-0.814787	-0.0314343	0.563332	0.671391	-0.173024	0.056988	0.294575	0.397324	0.400856	0.0271434	0.617787	0.714941	0.14573	-0.0296302	0.585946	0.672297	-0.172439	-0.0554516	0.307801	0.406447	-0.390997	0.0160855	0.767475	0.819651	0.0863709	0.00747717	0.890686	0.917187	0.0375421	-0.153088	0.00470493	0.0550081	-1.25957	-0.127055	0.0191499	0.132553	-0.87761	-0.0551753	0.31022	0.589818	-0.229282	-0.0771	0.155965	0.444143
113	GO_ANION_CATION_SYMPORTER_ACTIVITY	21	-0.20132	0.000191805	0.000802358	-3.09563	-0.0901018	0.0971728	0.178177	-0.749149	-0.0263169	0.628534	0.716433	-0.144824	-0.0590733	0.277239	0.393015	-0.405591	-0.0170439	0.754054	0.812962	-0.0899299	0.00844563	0.876634	0.911573	0.0402085	-0.0781775	0.150251	0.225111	-0.647603	-0.0778816	0.151804	0.228505	-0.641104	-0.159324	0.00325232	0.0475865	-1.32252	-0.141529	0.00901652	0.0993611	-1.00278	-0.0766594	0.158349	0.428463	-0.368087	-0.0864524	0.111534	0.380359
114	GO_ANION_CHANNEL_ACTIVITY	34	-0.206038	0.000134302	0.000590824	-3.22854	-0.106836	0.0490663	0.104905	-0.979203	-0.0992311	0.067642	0.122658	-0.911304	-0.112682	0.0378737	0.0807414	-1.0929	0.00615943	0.909861	0.935451	0.0289788	0.00589899	0.913657	0.938007	0.027794	-0.128417	0.0178908	0.0385112	-1.41441	-0.126268	0.0199119	0.042634	-1.37024	-0.0703629	0.195474	0.411378	-0.385759	-0.122238	0.0242421	0.142367	-0.84659	-0.00600982	0.912041	0.959856	-0.0177941	-0.0251311	0.644091	0.838473
115	GO_ANION_HOMEOSTASIS	22	-0.201758	0.000185628	0.000779124	-3.10839	-0.137591	0.0111414	0.0327732	-1.48448	0.00198394	0.970912	0.97909	0.00917742	-0.00955819	0.860538	0.902468	-0.0445683	0.0595786	0.273145	0.371975	0.429487	0.0808242	0.13689	0.21368	0.670236	-0.0669932	0.217782	0.306496	-0.513575	-0.0809283	0.136384	0.209712	-0.678376	-0.233017	1.50049e-05	0.00443146	-2.35345	-0.186954	0.000540901	0.0488235	-1.31137	-0.172525	0.0014258	0.050045	-1.30064	-0.194373	0.000319526	0.028356
116	GO_ANION_TRANSMEMBRANE_TRANSPORT	128	-0.242073	6.77193e-06	4.39233e-05	-4.3573	-0.0851686	0.116965	0.206272	-0.685559	0.0269114	0.620796	0.71026	0.148583	-0.0299245	0.582228	0.685976	-0.163691	-0.0892012	0.100572	0.169123	-0.771798	-0.074009	0.17327	0.258012	-0.58836	-0.0456626	0.401103	0.501237	-0.299957	-0.0477549	0.379857	0.483543	-0.315565	-0.134093	0.0133891	0.0913924	-1.03909	-0.168766	0.00181399	0.0633322	-1.19838	-0.0609571	0.262186	0.548059	-0.261173	-0.0877005	0.106445	0.374843
117	GO_ANION_TRANSMEMBRANE_TRANSPORTER_ACTIVITY	145	-0.241465	7.15083e-06	4.5977e-05	-4.33746	-0.0974343	0.0727853	0.141918	-0.847961	0.0200036	0.713088	0.787299	0.10386	-0.0196141	0.718437	0.795867	-0.0991592	-0.0708279	0.192532	0.283184	-0.547931	-0.0502671	0.355279	0.453308	-0.343607	-0.0480129	0.377286	0.477127	-0.321366	-0.0515381	0.343233	0.446688	-0.349996	-0.145297	0.00732904	0.0668235	-1.17507	-0.159575	0.00320336	0.0765048	-1.11631	-0.0763504	0.160036	0.430718	-0.365807	-0.098923	0.068502	0.310205
118	GO_ANION_TRANSPORT	272	-0.234448	1.32589e-05	7.9267e-05	-4.10091	-0.0836713	0.123559	0.215843	-0.665862	0.0413	0.447627	0.546878	0.262109	-0.00308246	0.954819	0.969038	-0.0136594	-0.0735535	0.175937	0.263044	-0.579971	-0.0663996	0.221893	0.312221	-0.505538	-0.0270097	0.61952	0.698695	-0.155712	-0.0351335	0.51832	0.614603	-0.211405	-0.147771	0.00638061	0.0628136	-1.20195	-0.174428	0.0012598	0.0613286	-1.21234	-0.0607895	0.263502	0.548153	-0.261098	-0.0854247	0.115865	0.387039
119	GO_ANTERIOR_POSTERIOR_AXIS_SPECIFICATION	25	-0.112269	0.0385859	0.0757022	-1.12089	-0.0712795	0.189706	0.299074	-0.524221	-0.0898503	0.098113	0.165074	-0.782321	-0.0734958	0.176277	0.275841	-0.559341	0.0924067	0.0888896	0.153615	0.813565	0.05617	0.301568	0.400344	0.397567	-0.091902	0.0906531	0.149236	-0.826127	-0.0860766	0.113103	0.180817	-0.74276	-0.053758	0.322827	0.538045	-0.269181	-0.0180121	0.740571	0.836892	-0.0773307	-0.0908151	0.0945463	0.338404	-0.470565	-0.0875262	0.107145	0.375812
120	GO_ANTERIOR_POSTERIOR_PATTERN_SPECIFICATION	120	0.00639482	0.906431	0.939736	0.0269943	0.06916	0.203238	0.315026	0.501654	0.104503	0.0542463	0.102465	0.989424	0.0882547	0.104246	0.184502	0.733999	-0.116314	0.0320739	0.068575	-1.16383	-0.156951	0.00374865	0.0124767	-1.9039	0.08406	0.12182	0.189422	0.72257	0.0833431	0.125042	0.195945	0.707866	-0.0522278	0.336807	0.550168	-0.259504	-0.0536668	0.32365	0.494404	-0.305918	0.0276222	0.611598	0.800604	0.0965824	0.00231765	0.966022	0.982786
121	GO_ANTEROGRADE_AXONAL_TRANSPORT	18	0.00461331	0.932425	0.959498	0.0179557	-0.0400225	0.461807	0.581691	-0.235308	0.00174732	0.974381	0.98214	0.00782651	0.00907671	0.867497	0.906245	0.0427545	0.0389973	0.473366	0.570927	0.24342	-0.00205508	0.96987	0.979823	-0.00885242	-0.0145324	0.789371	0.836182	-0.0776991	-0.0144237	0.79091	0.840285	-0.0755735	-0.0130507	0.810416	0.896639	-0.0473824	-0.0334726	0.538299	0.68663	-0.163278	-0.00955117	0.86064	0.938913	-0.0273746	0.00761883	0.888628	0.955491
122	GO_ANTIGEN_BINDING	42	-0.270295	4.65064e-07	4.03967e-06	-5.39365	-0.225434	2.85368e-05	0.000388978	-3.41007	-0.223972	3.22232e-05	0.000244852	-3.6111	-0.232127	1.61981e-05	0.00014765	-3.83077	0.211615	8.72368e-05	0.00068765	3.16263	0.203245	0.000166008	0.00107832	2.96725	-0.266451	6.81954e-07	8.43871e-06	-5.07372	-0.264535	8.23555e-07	1.10222e-05	-4.95773	-0.114176	0.0353878	0.157556	-0.802566	-0.094859	0.0807091	0.231641	-0.635184	-0.124777	0.0214286	0.180962	-0.742412	-0.11998	0.0270072	0.205449
123	GO_ANTIGEN_PROCESSING_AND_PRESENTATION	167	-0.046477	0.39294	0.504557	-0.29709	-0.131436	0.0153013	0.0421024	-1.37569	-0.120217	0.0266519	0.0582406	-1.23477	-0.0885943	0.102935	0.183059	-0.737408	0.154137	0.00438942	0.0144359	1.84056	0.156994	0.00370569	0.0123989	1.90662	-0.148306	0.00614922	0.0157645	-1.80232	-0.150227	0.00550986	0.0146775	-1.83335	-0.0530061	0.329823	0.54357	-0.264744	-0.00596699	0.912709	0.950918	-0.021857	-0.0996968	0.0663392	0.290103	-0.537448	-0.0939762	0.0835793	0.334565
124	GO_ANTIGEN_PROCESSING_AND_PRESENTATION_OF_EXOGENOUS_PEPTIDE_ANTIGEN_VIA_MHC_CLASS_I	56	-0.119084	0.0281254	0.0584681	-1.23308	-0.192674	0.000352665	0.00238885	-2.62181	-0.198438	0.000231202	0.00116522	-2.93359	-0.175091	0.00118815	0.00475951	-2.32244	0.254333	2.02662e-06	3.18366e-05	4.49707	0.266963	5.87208e-07	1.20992e-05	4.91724	-0.221383	3.81707e-05	0.000223672	-3.65039	-0.224926	2.84026e-05	0.000179492	-3.74596	-0.0697212	0.199694	0.41676	-0.380114	-0.0186658	0.731642	0.831283	-0.0802509	-0.122017	0.0244481	0.193402	-0.71354	-0.104274	0.0547463	0.274501
125	GO_ANTIGEN_PROCESSING_AND_PRESENTATION_OF_PEPTIDE_ANTIGEN	141	0.00609954	0.910778	0.943139	0.0254243	-0.098377	0.0700327	0.137805	-0.860736	-0.0863993	0.111782	0.18327	-0.736908	-0.0628695	0.247627	0.360615	-0.442957	0.129251	0.017102	0.0423014	1.37365	0.152306	0.00488566	0.0153718	1.81328	-0.111702	0.0395376	0.0748832	-1.12562	-0.113621	0.0362479	0.0703982	-1.15244	-0.0325486	0.549763	0.722115	-0.141394	0.0133581	0.806135	0.880468	0.0552864	-0.0917132	0.0913266	0.331078	-0.48007	-0.0866607	0.110699	0.380359
126	GO_ANTIGEN_PROCESSING_AND_PRESENTATION_OF_PEPTIDE_ANTIGEN_VIA_MHC_CLASS_I	79	-0.12992	0.0165321	0.0373279	-1.42797	-0.189862	0.000431461	0.0027701	-2.5575	-0.193144	0.000340876	0.00161333	-2.79228	-0.184346	0.000635549	0.00281548	-2.55045	0.224283	2.99766e-05	0.000299621	3.52343	0.247506	3.85527e-06	5.31094e-05	4.27483	-0.222799	3.3936e-05	0.000202337	-3.69393	-0.227579	2.26919e-05	0.000149369	-3.82574	-0.0588757	0.279005	0.497182	-0.303485	-0.0220912	0.684822	0.796681	-0.0987153	-0.105	0.0530744	0.265228	-0.57638	-0.0956557	0.0781794	0.328008
127	GO_ANTIGEN_PROCESSING_AND_PRESENTATION_OF_PEPTIDE_OR_POLYSACCHARIDE_ANTIGEN_VIA_MHC_CLASS_II	72	0.151195	0.00521061	0.0139306	1.85603	-0.0322022	0.554021	0.663332	-0.178269	0.0163667	0.763646	0.829358	0.0812578	0.0528901	0.330885	0.448322	0.34841	0.0185931	0.732647	0.794523	0.0998935	0.0371031	0.495326	0.588756	0.230065	-0.011536	0.832156	0.869918	-0.0605217	-0.00949958	0.861455	0.894363	-0.0484864	-0.0310835	0.567878	0.73344	-0.134635	0.00699569	0.897737	0.940658	0.0265685	-0.0766478	0.158485	0.428463	-0.368087	-0.0691276	0.203559	0.49987
128	GO_ANTIGEN_RECEPTOR_MEDIATED_SIGNALING_PATHWAY	118	-0.000834011	0.987775	0.99203	-0.0034751	-0.0722192	0.184017	0.292395	-0.53403	-0.0513626	0.34506	0.449857	-0.346926	-0.0132361	0.807871	0.866764	-0.0620991	0.103092	0.0575674	0.109358	0.961148	0.101805	0.0607722	0.112671	0.948189	-0.0727263	0.180948	0.263598	-0.579058	-0.0751204	0.16697	0.24755	-0.606337	-0.0471034	0.386586	0.59734	-0.223778	-0.0120378	0.82497	0.892575	-0.0493555	-0.0772344	0.155314	0.424192	-0.372437	-0.0705067	0.194663	0.490212
129	GO_ANTIMICROBIAL_HUMORAL_RESPONSE	21	0.254128	2.23891e-06	1.63131e-05	4.78746	0.0692003	0.202974	0.314837	0.501914	0.0920937	0.0899798	0.154321	0.811576	0.110107	0.0425037	0.0890687	1.05027	-0.0307803	0.571481	0.659802	-0.180586	-0.0425838	0.433628	0.530069	-0.275667	0.0894582	0.0995924	0.161373	0.792168	0.0831614	0.125869	0.196962	0.705617	-0.000860073	0.987389	0.994487	-0.0024009	0.0326476	0.548363	0.693873	0.15872	0.0382038	0.482421	0.71957	0.142927	0.0500915	0.356963	0.651139
130	GO_ANTIPORTER_ACTIVITY	38	-0.050126	0.356632	0.46839	-0.329393	0.0385799	0.478117	0.598543	0.222905	0.180397	0.00084772	0.00344849	2.46237	0.162152	0.00273912	0.00962277	2.0167	-0.198516	0.000236161	0.0014903	-2.82673	-0.152149	0.00496841	0.0155219	-1.80905	0.130274	0.0162906	0.0357618	1.44658	0.118437	0.0290488	0.0583346	1.23407	-0.095698	0.0780543	0.244023	-0.612569	-0.116194	0.0322526	0.156845	-0.804529	-0.0225924	0.677917	0.838299	-0.0766011	-0.0510557	0.347774	0.643122
131	GO_AORTA_DEVELOPMENT	34	0.0184728	0.734183	0.811484	0.0907199	0.0128003	0.813986	0.872057	0.059455	0.145756	0.00714389	0.0198679	1.70185	0.12519	0.0209987	0.0500939	1.30022	-0.138927	0.0103753	0.0288168	-1.54035	-0.110291	0.0421575	0.0848893	-1.07115	0.103735	0.0560487	0.0997572	1.00106	0.0891245	0.100866	0.165067	0.782341	-0.154774	0.00426322	0.0534509	-1.27204	-0.155234	0.00414955	0.0804187	-1.09464	-0.0194666	0.720465	0.86261	-0.0641853	-0.0436921	0.421748	0.699402
132	GO_AORTA_MORPHOGENESIS	16	-0.0914864	0.092126	0.156908	-0.804354	-0.0778785	0.15182	0.252179	-0.59829	0.0451619	0.406291	0.509247	0.293071	0.00879368	0.871592	0.908293	0.0417739	-0.0368543	0.498032	0.594142	-0.22611	-0.00126889	0.981395	0.987861	-0.00530402	-0.00599303	0.912286	0.934434	-0.0294514	-0.0199878	0.713306	0.779798	-0.108018	-0.159396	0.00323811	0.0475865	-1.32252	-0.152688	0.00481556	0.0808474	-1.09233	-0.0542771	0.318172	0.596073	-0.224701	-0.0697211	0.199589	0.495894
133	GO_AP_TYPE_MEMBRANE_COAT_ADAPTOR_COMPLEX	34	0.0865022	0.111327	0.183202	0.73707	0.109499	0.043665	0.0961411	1.01709	0.0355405	0.513484	0.61083	0.214079	0.0613821	0.258869	0.373183	0.428078	-0.0576111	0.28932	0.388744	-0.410336	-0.0468179	0.389285	0.487139	-0.312347	0.0996435	0.0665043	0.115219	0.938477	0.101303	0.0620843	0.109531	0.960461	0.0942978	0.0825251	0.25109	0.600171	0.0863535	0.111945	0.27643	0.558414	0.103884	0.0556953	0.268769	0.570621	0.0954332	0.0788841	0.328437
134	GO_APICAL_JUNCTION_ASSEMBLY	29	0.114453	0.0349437	0.070112	1.15421	0.138445	0.0106464	0.0316746	1.49929	0.228596	2.18842e-05	0.000181425	3.7413	0.181858	0.000767951	0.00332148	2.47867	-0.236722	1.08763e-05	0.000127466	-3.89461	-0.239824	8.27499e-06	9.72366e-05	-4.01217	0.209443	0.000103334	0.000509766	3.29263	0.20156	0.000188396	0.000874778	3.0581	-0.0362275	0.505373	0.690891	-0.16059	-0.0636106	0.241952	0.416252	-0.380643	0.0746837	0.169376	0.44346	0.353146	0.0418819	0.44125	0.709186
135	GO_APICAL_JUNCTION_COMPLEX	84	0.0290211	0.593674	0.691917	0.159946	0.0614596	0.258267	0.378247	0.422224	0.13161	0.0152181	0.0366393	1.43605	0.120181	0.026751	0.0610232	1.2145	-0.128305	0.017991	0.0439307	-1.35723	-0.161273	0.00289018	0.0102101	-1.99097	0.109389	0.0438776	0.0815343	1.08866	0.10804	0.0465584	0.086807	1.06145	-0.055041	0.311401	0.527536	-0.277748	-0.0511763	0.346635	0.516738	-0.28673	0.00889413	0.870138	0.941544	0.0261592	0.00169755	0.97511	0.987605
136	GO_APICAL_PART_OF_CELL	193	-0.0620196	0.253949	0.360922	-0.442587	-0.105965	0.0509494	0.108148	-0.96598	0.0482373	0.375058	0.479789	0.31895	0.00419869	0.938485	0.957726	0.0187585	-0.0397267	0.465127	0.562674	-0.249743	-0.0484193	0.373258	0.470958	-0.327018	-0.0480328	0.377089	0.477052	-0.321434	-0.0517063	0.341659	0.445322	-0.351326	-0.155041	0.00419694	0.0531213	-1.27473	-0.166443	0.00210004	0.0684058	-1.16491	-0.0896713	0.098786	0.346494	-0.460304	-0.0945066	0.0818455	0.334171
137	GO_APICAL_PLASMA_MEMBRANE	151	-0.052901	0.33061	0.443013	-0.353584	-0.0967666	0.0747761	0.145161	-0.838149	0.0550474	0.311345	0.414316	0.382669	0.0237517	0.662385	0.751199	0.124245	-0.053315	0.326835	0.426348	-0.370235	-0.0560311	0.302767	0.401428	-0.396392	-0.0374313	0.491324	0.588738	-0.230078	-0.0397047	0.465374	0.566842	-0.246538	-0.157168	0.00370061	0.0504571	-1.29708	-0.164144	0.00242317	0.0717186	-1.14437	-0.0947072	0.0811969	0.312785	-0.504755	-0.0988796	0.0686238	0.310205
138	GO_APOPTOTIC_CELL_CLEARANCE	19	-0.145403	0.00728573	0.0184117	-1.73491	-0.0338283	0.533988	0.647552	-0.188725	-0.0338191	0.534099	0.628936	-0.201393	-0.0474353	0.383058	0.500721	-0.300404	0.00415442	0.939133	0.957155	0.019018	-0.0433779	0.425096	0.522234	-0.282135	-0.0501184	0.356705	0.458695	-0.338476	-0.0507562	0.350612	0.454289	-0.342668	-0.0593227	0.275213	0.493401	-0.3068	-0.0848046	0.118542	0.283553	-0.547365	-0.00781301	0.885809	0.9474	-0.0234664	-0.0192342	0.723664	0.882921
139	GO_APOPTOTIC_MITOCHONDRIAL_CHANGES	48	-0.264225	8.49038e-07	6.85353e-06	-5.16409	-0.20528	0.0001423	0.00117391	-2.93037	-0.163074	0.00258852	0.00868067	-2.06145	-0.152312	0.00492174	0.0154608	-1.81077	0.189994	0.000436989	0.00238407	2.62268	0.164166	0.00241988	0.00888157	2.05151	-0.198615	0.00023445	0.00101371	-2.99409	-0.194392	0.000319096	0.00136316	-2.86545	-0.136831	0.0115993	0.0848182	-1.07151	-0.0968151	0.0746299	0.222185	-0.653286	-0.185651	0.000592111	0.0354466	-1.45043	-0.176856	0.00107391	0.0453088
140	GO_APOPTOTIC_NUCLEAR_CHANGES	19	0.120911	0.025836	0.0545536	1.26318	0.0256971	0.636645	0.733317	0.134708	0.01025	0.850558	0.895037	0.0481588	0.0166369	0.759745	0.827759	0.0820961	0.0745558	0.170109	0.255972	0.591807	0.0585478	0.281541	0.379327	0.420987	0.0174378	0.74856	0.80538	0.0939993	0.0107105	0.843929	0.882371	0.0543487	-0.00331023	0.951485	0.977296	-0.00997396	0.0178899	0.742268	0.838197	0.076654	0.000446676	0.993451	0.996601	0.00147871	0.0105508	0.846227	0.935559
141	GO_APOPTOTIC_PROCESS_INVOLVED_IN_DEVELOPMENT	15	0.0592449	0.275845	0.383912	0.415769	0.136974	0.0115122	0.033574	1.474	0.182642	0.000728061	0.00305427	2.51509	0.1559	0.00398969	0.0130438	1.8846	-0.204043	0.000156301	0.00108529	-2.96445	-0.209366	0.00010396	0.000748851	-3.1256	0.18271	0.00072469	0.00262715	2.58052	0.177913	0.00100119	0.0035482	2.44999	-0.0241089	0.657627	0.799476	-0.0971948	-0.0415207	0.445202	0.607592	-0.216388	0.0590305	0.277588	0.559942	0.251857	0.0278435	0.608746	0.819128
142	GO_APOPTOTIC_SIGNALING_PATHWAY	237	-0.267491	5.56812e-07	4.72543e-06	-5.32556	-0.213342	7.3367e-05	0.000740355	-3.13056	-0.126698	0.0194387	0.045062	-1.34619	-0.128511	0.0177523	0.043666	-1.35986	0.16681	0.00202762	0.00801456	2.09612	0.172529	0.00140541	0.00577549	2.23841	-0.188403	0.000478489	0.00184322	-2.73442	-0.196337	0.000270056	0.001181	-2.92775	-0.177598	0.0010059	0.0299603	-1.52345	-0.128103	0.0181202	0.131596	-0.880757	-0.17394	0.0012816	0.0497084	-1.30357	-0.181068	0.00079596	0.0400693
143	GO_APPENDAGE_DEVELOPMENT	122	0.121567	0.0250371	0.0531708	1.27433	0.241771	6.95778e-06	0.000142737	3.84546	0.264059	8.62938e-07	1.33199e-05	4.8755	0.215391	6.47278e-05	0.000427338	3.36923	-0.313819	4.03138e-09	2.83476e-07	-6.54748	-0.323511	1.25786e-09	1.00611e-07	-6.99735	0.277205	2.30288e-07	3.57957e-06	5.44617	0.274535	3.02804e-07	4.92536e-06	5.30756	0.0303523	0.576845	0.741351	0.129976	-0.0225936	0.6779	0.791791	-0.10139	0.143236	0.00821331	0.109501	0.960581	0.101702	0.0610593	0.293376
144	GO_ARACHIDONIC_ACID_METABOLIC_PROCESS	21	-0.169999	0.00167705	0.00528778	-2.27673	-0.166109	0.0021444	0.00925898	-2.03344	-0.123309	0.0230184	0.0515789	-1.28753	-0.136951	0.0115261	0.030871	-1.51045	0.0976822	0.0720572	0.130611	0.88402	0.105763	0.0513937	0.0987348	1.00553	-0.160189	0.00308679	0.00882209	-2.05443	-0.1642	0.00241481	0.00738275	-2.13178	-0.0732723	0.177598	0.387948	-0.411226	-0.056534	0.298443	0.467228	-0.330471	-0.101086	0.0626483	0.283654	-0.547211	-0.108016	0.0466075	0.256486
145	GO_ARF_GUANYL_NUCLEOTIDE_EXCHANGE_FACTOR_ACTIVITY	19	0.11052	0.0417308	0.0809401	1.09184	0.143953	0.00789547	0.0250911	1.60048	0.167462	0.00196979	0.00692552	2.15955	0.12748	0.0187484	0.045685	1.34023	-0.207337	0.000121584	0.000897692	-3.04687	-0.224125	3.18165e-05	0.000296107	-3.52855	0.154361	0.00436779	0.0119	1.92445	0.154082	0.00443983	0.0123268	1.90915	0.0252584	0.642413	0.789776	0.102496	-0.0355762	0.51306	0.664189	-0.177708	0.135635	0.0123531	0.13784	0.860623	0.107502	0.0476652	0.259641
146	GO_ARTERY_DEVELOPMENT	60	-0.0504176	0.353839	0.46555	-0.332034	-0.042694	0.432438	0.55335	-0.257	0.0496442	0.361277	0.46647	0.331176	0.0108933	0.841299	0.890551	0.0503413	-0.0816593	0.13287	0.210145	-0.677481	-0.0472228	0.385194	0.483533	-0.315574	0.000807558	0.988159	0.992033	0.00347395	-0.00620339	0.90922	0.931724	-0.0307125	-0.146288	0.0069347	0.0659243	-1.18095	-0.152464	0.0048784	0.0812238	-1.09032	-0.0368088	0.498563	0.727961	-0.137892	-0.0597749	0.271566	0.571694
147	GO_ARTERY_MORPHOGENESIS	38	-0.116201	0.0322421	0.0655496	-1.18343	-0.0970551	0.0739105	0.143796	-0.842253	-0.027406	0.614389	0.704567	-0.152077	-0.0666381	0.220235	0.329386	-0.482295	-0.0104375	0.847858	0.887316	-0.0519216	0.027054	0.618946	0.698759	0.155673	-0.0745439	0.170177	0.250689	-0.600865	-0.081339	0.134401	0.207239	-0.683529	-0.142358	0.00861814	0.0722531	-1.14114	-0.141655	0.00895473	0.099223	-1.00339	-0.046745	0.390025	0.656849	-0.182534	-0.0615317	0.257709	0.556886
148	GO_ASPARTATE_FAMILY_AMINO_ACID_BIOSYNTHETIC_PROCESS	21	0.104758	0.0536575	0.100254	0.998897	-0.0417781	0.442384	0.563635	-0.249002	-0.0939378	0.0837074	0.145649	-0.836691	-0.0685704	0.207123	0.312946	-0.504531	0.0865394	0.111173	0.18256	0.738593	0.0852467	0.116629	0.18822	0.725333	-0.0851737	0.116943	0.183578	-0.73618	-0.0801351	0.140277	0.214582	-0.668407	0.062578	0.249692	0.4689	0.328919	0.0565737	0.298104	0.467228	0.330471	0.0207926	0.702301	0.853785	0.0686514	0.0389933	0.473412	0.731847
149	GO_ASPARTATE_FAMILY_AMINO_ACID_METABOLIC_PROCESS	43	0.123882	0.0223862	0.0483761	1.31537	0.00369126	0.945908	0.965079	0.0154372	0.0540182	0.320489	0.424317	0.37231	0.0441904	0.41647	0.533689	0.272712	-0.056694	0.297076	0.396758	-0.401474	-0.0629294	0.247039	0.341035	-0.467201	0.0342622	0.528754	0.620584	0.207199	0.0383167	0.481126	0.57997	0.236595	0.031859	0.55807	0.727497	0.138169	0.0148295	0.785169	0.867623	0.0616689	0.0181601	0.738516	0.875	0.0579919	0.0228712	0.674169	0.855015
150	GO_ASSOCIATIVE_LEARNING	42	-0.0472594	0.384825	0.496151	-0.304386	-0.000923578	0.986458	0.990482	-0.00415328	0.0557215	0.305449	0.407941	0.389402	0.0514685	0.343886	0.46178	0.335565	-0.0379311	0.485553	0.582296	-0.234856	-0.0460952	0.396653	0.49331	-0.30688	0.0203102	0.70889	0.772162	0.112292	0.0139633	0.797437	0.845333	0.0729723	-0.0887298	0.102389	0.279816	-0.553127	-0.0884171	0.103608	0.265001	-0.576752	-0.035107	0.518637	0.742826	-0.129113	-0.0432619	0.426337	0.70076
151	GO_ASTROCYTE_DIFFERENTIATION	22	-0.128752	0.0175919	0.0393199	-1.40539	0.0251213	0.64422	0.739734	0.130925	-0.0162712	0.76487	0.829873	-0.0809881	-0.00989618	0.85566	0.899946	-0.0457836	0.0137254	0.800814	0.850134	0.0705128	-0.0257497	0.635956	0.713301	-0.146727	-0.0084957	0.875908	0.905337	-0.0431899	-0.00440448	0.935477	0.951369	-0.0216511	-0.0486318	0.371162	0.581006	-0.235819	-0.0267639	0.622711	0.750643	-0.124567	-0.0370799	0.495403	0.725613	-0.139295	-0.0600674	0.269224	0.568476
152	GO_ATP_BIOSYNTHETIC_PROCESS	29	-0.0131505	0.808993	0.867758	-0.0616013	-0.0392177	0.470868	0.591254	-0.228226	-0.0503776	0.354221	0.459637	-0.337585	-0.0236836	0.663293	0.751199	-0.124245	0.0772328	0.155252	0.238209	0.623041	0.0459401	0.398245	0.494457	0.305871	-0.0672585	0.215962	0.304395	-0.516563	-0.0640472	0.238731	0.331181	-0.479935	0.01798	0.741016	0.853537	0.0687777	0.0153509	0.777809	0.863583	0.0636961	-0.0261279	0.631002	0.810949	-0.0910067	-0.0291683	0.591803	0.813431
153	GO_ATP_DEPENDENT_CHROMATIN_REMODELING	68	0.425282	2.29057e-16	5.07361e-13	12.2947	0.232426	1.49537e-05	0.000244447	3.61182	0.224362	2.97809e-05	0.000231862	3.63477	0.256604	1.62976e-06	2.88793e-05	4.53941	-0.148111	0.0062176	0.0190089	-1.72104	-0.167713	0.00191509	0.00742896	-2.12907	0.266673	6.04615e-07	7.63089e-06	5.11742	0.263836	8.02761e-07	1.08422e-05	4.96488	0.104928	0.0532378	0.198188	0.702923	0.127684	0.0185052	0.13171	0.88038	0.117829	0.0298389	0.20993	0.677925	0.12945	0.0169305	0.172717
154	GO_ATP_DEPENDENT_DNA_HELICASE_ACTIVITY	34	0.33115	4.87755e-10	1.01922e-08	7.99173	0.243609	5.89929e-06	0.000129376	3.88815	0.236513	1.10769e-05	0.000107196	3.96982	0.233393	1.4526e-05	0.000137501	3.8617	-0.180077	0.000866184	0.00411275	-2.38587	-0.161935	0.00277568	0.00992916	-2.00309	0.280236	1.68194e-07	2.72931e-06	5.56395	0.277009	2.34994e-07	4.01439e-06	5.39638	0.103843	0.0557921	0.203759	0.690884	0.107324	0.0480362	0.182192	0.73947	0.103588	0.0563989	0.270984	0.567057	0.103763	0.0559805	0.279117
155	GO_ATP_DEPENDENT_MICROTUBULE_MOTOR_ACTIVITY	15	0.297801	2.53186e-08	3.29886e-07	6.48164	0.251726	2.80378e-06	7.60089e-05	4.11914	0.189479	0.000453149	0.00202568	2.69343	0.200997	0.00019649	0.00106614	2.97219	-0.191681	0.000387649	0.0021932	-2.65892	-0.192533	0.00036475	0.00197295	-2.70488	0.254389	2.18456e-06	2.10382e-05	4.67699	0.259488	1.34468e-06	1.62007e-05	4.79047	0.115705	0.0329904	0.149821	0.824426	0.100062	0.0653659	0.209682	0.678439	0.159435	0.00323067	0.0694789	1.15815	0.150481	0.00546923	0.10134
156	GO_ATP_GENERATION_FROM_ADP	25	-0.11236	0.0384285	0.0754937	-1.12209	-0.258031	1.54618e-06	5.15006e-05	-4.28819	-0.0816367	0.132978	0.21198	-0.673705	-0.104981	0.0531497	0.107024	-0.970518	0.160836	0.00296802	0.0106292	1.9735	0.14673	0.00676521	0.0198345	1.70258	-0.19487	0.000308248	0.00126147	-2.89912	-0.196811	0.000267656	0.00117282	-2.93077	-0.199261	0.000223527	0.0159713	-1.79666	-0.178736	0.000947675	0.0564122	-1.24863	-0.200904	0.00019785	0.0214263	-1.66905	-0.190444	0.000423277	0.0323296
157	GO_ATP_HYDROLYSIS_COUPLED_TRANSMEMBRANE_TRANSPORT	25	-0.180258	0.000855691	0.00296149	-2.52849	-0.206624	0.000128424	0.00108988	-2.96262	-0.162223	0.00272722	0.00906736	-2.04252	-0.134274	0.013264	0.0346256	-1.4606	0.184621	0.000635775	0.00319692	2.49527	0.167925	0.0019132	0.0074281	2.12912	-0.210443	9.56034e-05	0.000478865	-3.31979	-0.207414	0.000120867	0.000602294	-3.22019	-0.096646	0.0751404	0.23881	-0.621948	-0.0656775	0.226969	0.402994	-0.394701	-0.152507	0.00486641	0.0860984	-1.065	-0.138851	0.0104178	0.139395
158	GO_ATPASE_ACTIVATOR_ACTIVITY	15	-0.0799119	0.141388	0.222583	-0.652507	-0.0537574	0.322833	0.444836	-0.3518	-0.10859	0.0454494	0.0892864	-1.04921	-0.0895773	0.0991412	0.17774	-0.750215	0.0702393	0.196262	0.287039	0.542059	0.0558259	0.304543	0.402964	0.394733	-0.104933	0.0532575	0.0956734	-1.01921	-0.0918678	0.0907736	0.15146	-0.819701	0.0426058	0.43339	0.638144	0.195082	0.0251479	0.643869	0.766758	0.115341	0.0144915	0.78995	0.902492	0.0445569	0.0229395	0.673251	0.854873
159	GO_ATPASE_ACTIVITY	337	0.315947	2.55938e-09	4.48144e-08	7.34858	0.204751	0.000143608	0.00118031	2.92801	0.204654	0.000144679	0.000796184	3.09899	0.229924	1.85662e-05	0.00016556	3.78104	-0.173184	0.00134661	0.00582764	-2.23451	-0.155945	0.00394471	0.0129926	-1.8863	0.234722	1.22343e-05	8.41583e-05	4.0749	0.236898	1.00958e-05	7.68459e-05	4.11438	0.0757443	0.163464	0.370976	0.430654	0.0782294	0.150045	0.320944	0.49357	0.0811933	0.135154	0.394105	0.404388	0.0752445	0.166269	0.457213
160	GO_ATPASE_ACTIVITY_COUPLED	249	0.283911	1.00527e-07	1.09419e-06	5.96091	0.166842	0.00202364	0.00884096	2.0535	0.195929	0.000278273	0.00136065	2.86625	0.224395	2.96984e-05	0.000233684	3.63137	-0.162669	0.00262561	0.00969286	-2.01355	-0.142922	0.00831002	0.0232261	-1.63402	0.21317	7.43818e-05	0.000385393	3.4141	0.211161	8.72347e-05	0.00046226	3.33511	0.0338047	0.534461	0.711211	0.148001	0.0454059	0.403948	0.567911	0.245719	0.0457887	0.399993	0.66242	0.178867	0.0351031	0.518872	0.763546
161	GO_ATPASE_ACTIVITY_COUPLED_TO_MOVEMENT_OF_SUBSTANCES	80	-0.163272	0.0025572	0.00757246	-2.12076	-0.0599834	0.269895	0.391626	-0.407128	0.0213232	0.695079	0.772503	0.1121	-0.0076857	0.887657	0.920272	-0.0360839	-0.0741723	0.172321	0.258949	-0.586785	-0.0877909	0.106084	0.174703	-0.757699	-0.0270341	0.619203	0.698516	-0.155824	-0.0239358	0.659931	0.736397	-0.132888	-0.0985734	0.0694888	0.229386	-0.639434	-0.129747	0.0167311	0.127332	-0.895062	-0.0620538	0.253687	0.539526	-0.267988	-0.0894524	0.0996145	0.363503
162	GO_ATPASE_ACTIVITY_COUPLED_TO_TRANSMEMBRANE_MOVEMENT_OF_IONS_PHOSPHORYLATIVE_MECHANISM	18	-0.0625246	0.250097	0.356592	-0.447829	-0.0551512	0.310432	0.43246	-0.364055	-0.0165371	0.761142	0.827248	-0.0823645	-0.0370008	0.496324	0.609907	-0.214736	-0.0242985	0.655108	0.731752	-0.135636	-0.0296235	0.586031	0.670138	-0.173835	-0.058107	0.285185	0.381913	-0.418036	-0.0521216	0.337792	0.442074	-0.354505	-0.0746911	0.169334	0.377968	-0.422545	-0.0654699	0.228443	0.403755	-0.393882	-0.0349967	0.519951	0.74384	-0.128521	-0.0488574	0.368945	0.661824
163	GO_ATPASE_BINDING	56	-0.00281348	0.958778	0.973948	-0.0114643	-0.00629835	0.907883	0.938439	-0.027594	-0.0344163	0.527089	0.622336	-0.205975	-0.0314004	0.563936	0.669651	-0.174151	0.0518679	0.340329	0.43907	0.357466	0.00860348	0.87441	0.910159	0.0408826	-0.0486611	0.371058	0.471946	-0.326107	-0.0467593	0.390068	0.493573	-0.306648	-0.00791621	0.884369	0.942448	-0.0257426	-0.00473361	0.930701	0.959051	-0.0181581	0.0376918	0.488505	0.721251	0.141914	0.0461982	0.395788	0.682934
164	GO_ATPASE_COUPLED_ION_TRANSMEMBRANE_TRANSPORTER_ACTIVITY	47	-0.123344	0.0229795	0.0495133	-1.30528	-0.126192	0.0199869	0.0518092	-1.28559	-0.0758971	0.162538	0.248034	-0.605489	-0.0795389	0.14326	0.236102	-0.626901	0.0149095	0.784039	0.837342	0.0770973	0.0085592	0.874988	0.910333	0.0407998	-0.123696	0.0225898	0.0466757	-1.33091	-0.115371	0.0335021	0.0658449	-1.18148	-0.0898698	0.0980397	0.274189	-0.56195	-0.0860637	0.113157	0.276965	-0.557575	-0.0821389	0.130603	0.388254	-0.410884	-0.0918492	0.0908393	0.348612
165	GO_ATPASE_REGULATOR_ACTIVITY	26	-0.0514438	0.344119	0.456694	-0.340375	-0.153862	0.00449718	0.0164377	-1.78416	-0.223878	3.24759e-05	0.00024635	-3.60845	-0.172999	0.00138267	0.005435	-2.2648	0.212198	8.33388e-05	0.000659269	3.18094	0.17787	0.001004	0.00441924	2.35465	-0.221246	4.0334e-05	0.000233263	-3.63215	-0.207038	0.000124412	0.000615579	-3.21072	0.0392327	0.470699	0.667262	0.175703	0.0595386	0.273468	0.444084	0.352534	-0.047889	0.37852	0.649184	-0.187633	-0.00735229	0.8925	0.95846
166	GO_AU_RICH_ELEMENT_BINDING	19	0.0716987	0.18711	0.281268	0.550879	0.034126	0.530394	0.644091	0.191053	0.0415955	0.444382	0.544267	0.264188	0.0772978	0.154904	0.250264	0.601601	0.0381381	0.483174	0.580657	0.236081	0.0111718	0.837298	0.878548	0.0562343	0.0494952	0.362722	0.464926	0.332616	0.0439965	0.418519	0.521824	0.282476	-0.00298354	0.956268	0.979141	-0.00915491	0.0349525	0.520479	0.669631	0.174165	-0.0169312	0.755628	0.883694	-0.0536982	-0.00675479	0.90119	0.962277
167	GO_AUDITORY_RECEPTOR_CELL_DIFFERENTIATION	16	-0.0498399	0.359386	0.471029	-0.326952	0.000197539	0.997105	0.997781	0.000964832	0.072084	0.184747	0.274917	0.560798	0.0538686	0.321832	0.439223	0.357315	-0.0486007	0.371469	0.473283	-0.324879	-0.0448285	0.409767	0.506493	-0.295427	0.0467663	0.389808	0.489548	0.310205	0.0377641	0.487477	0.585079	0.232786	-0.0961907	0.0765284	0.241326	-0.617397	-0.0547057	0.314361	0.485105	-0.314165	-0.0358364	0.509982	0.737059	-0.132498	-0.0504661	0.353375	0.647195
168	GO_AUTONOMIC_NERVOUS_SYSTEM_DEVELOPMENT	24	-0.147281	0.00655912	0.0168739	-1.77278	-0.126403	0.0197796	0.0514224	-1.28885	-0.00655756	0.904061	0.93354	-0.0298672	-0.0491847	0.365743	0.483943	-0.315206	-0.0226812	0.676721	0.74872	-0.125681	-0.00935974	0.863405	0.902095	-0.0447475	-0.0745366	0.170219	0.250689	-0.600865	-0.0821951	0.130339	0.202243	-0.694127	-0.174149	0.00128297	0.0318772	-1.49652	-0.179289	0.000913289	0.0564122	-1.24863	-0.113752	0.0360797	0.228612	-0.640901	-0.127376	0.0188462	0.181103
169	GO_AUTOPHAGOSOME	70	-0.272567	3.31948e-07	3.01558e-06	-5.52063	-0.166947	0.00201026	0.00882603	-2.05423	-0.112793	0.0376373	0.0765431	-1.11609	-0.140618	0.00942506	0.0262433	-1.58098	0.100726	0.0635704	0.118476	0.92637	0.096501	0.0755705	0.133218	0.875436	-0.155516	0.00404634	0.0111684	-1.95201	-0.159227	0.00324	0.00946158	-2.02404	-0.136743	0.0116027	0.0848182	-1.07151	-0.146705	0.00673177	0.0903663	-1.04399	-0.106609	0.0495151	0.25506	-0.593357	-0.118618	0.0287513	0.211177
170	GO_AUTOPHAGOSOME_MEMBRANE	23	-0.270157	4.71533e-07	4.07987e-06	-5.38935	-0.136515	0.0117945	0.03415	-1.46661	-0.12729	0.0189266	0.0440362	-1.35619	-0.144036	0.00785937	0.0228458	-1.64119	0.122417	0.0240338	0.0552516	1.25766	0.129387	0.0170384	0.0411561	1.38557	-0.147874	0.00634334	0.0161779	-1.79108	-0.153955	0.00447293	0.0123922	-1.90685	-0.079199	0.144981	0.346235	-0.460629	-0.0967595	0.0747973	0.222333	-0.652995	-0.0373165	0.492655	0.722908	-0.140917	-0.0415567	0.444807	0.710857
171	GO_AUTOPHAGOSOME_ORGANIZATION	36	-0.309233	6.89768e-09	1.06842e-07	-6.97126	-0.254483	2.16535e-06	6.52551e-05	-4.18539	-0.198901	0.000229553	0.00116053	-2.93534	-0.21799	5.2548e-05	0.000362034	-3.44125	0.166448	0.00209936	0.00820121	2.08612	0.175333	0.00118729	0.00502839	2.29857	-0.25656	1.7789e-06	1.78292e-05	-4.74887	-0.254803	2.10093e-06	2.22658e-05	-4.65236	-0.129199	0.0172011	0.104671	-0.980172	-0.135032	0.0127495	0.11542	-0.937718	-0.142612	0.00849924	0.112393	-0.949261	-0.137327	0.0112988	0.143011
172	GO_AUTOPHAGY	322	0.0135421	0.803519	0.863945	0.0635141	-0.0483001	0.374622	0.497624	-0.303099	0.0136633	0.801797	0.858376	0.0663226	0.0305614	0.574402	0.678923	0.16818	0.0528643	0.331121	0.430292	0.366237	0.0823152	0.129823	0.205399	0.687402	-0.0162906	0.764714	0.817688	-0.0874124	-0.0267879	0.622569	0.703745	-0.152584	-0.0774471	0.154176	0.357623	-0.446575	-0.0398547	0.463883	0.62368	-0.205038	-0.0432058	0.42713	0.683205	-0.165449	-0.0432211	0.426966	0.70076
173	GO_AXIS_ELONGATION	20	-0.00164321	0.975907	0.984526	-0.00677259	0.017937	0.741614	0.817998	0.0872479	0.0515204	0.343399	0.448352	0.348381	0.0227979	0.675153	0.761244	0.118476	-0.0775699	0.153453	0.236123	-0.626862	-0.0703782	0.195377	0.282758	-0.548586	0.0389381	0.474039	0.572633	0.242123	0.037351	0.492255	0.589453	0.229551	-0.0306564	0.573032	0.737824	-0.132047	-0.0507754	0.35043	0.520068	-0.28394	0.0178448	0.742896	0.877374	0.0568155	-0.00642963	0.905924	0.963564
174	GO_AXIS_SPECIFICATION	54	0.026625	0.624518	0.71767	0.144075	0.150377	0.00550186	0.0191013	1.71894	0.109015	0.0446076	0.0880622	1.05521	0.0974755	0.0726638	0.137741	0.860937	-0.131292	0.0154681	0.0391118	-1.40769	-0.207435	0.000120668	0.000851212	-3.06996	0.141688	0.00893882	0.0216034	1.66548	0.14582	0.00711839	0.018199	1.73995	0.00156077	0.977115	0.990531	0.00413192	-0.0167874	0.757638	0.849725	-0.0707216	0.0666845	0.219913	0.502591	0.298785	0.0426788	0.432602	0.703266
175	GO_AXO_DENDRITIC_TRANSPORT	27	-0.00351479	0.94849	0.969947	-0.0132518	-0.00702622	0.897241	0.932171	-0.0305043	0.0675003	0.214313	0.309052	0.509969	0.0612908	0.259579	0.37381	0.427349	-0.0226232	0.677502	0.749209	-0.125397	-0.0693425	0.202045	0.290133	-0.537403	0.0381265	0.483307	0.581175	0.235693	0.0348581	0.521606	0.616849	0.209821	-0.0565608	0.298213	0.514642	-0.288495	-0.0844239	0.120209	0.285316	-0.544673	-0.00683173	0.900071	0.954359	-0.0202882	-0.00507403	0.925694	0.966099
176	GO_AXON	269	0.0346075	0.524606	0.632039	0.199256	0.13348	0.013822	0.0387368	1.41188	0.27699	2.35452e-07	5.05954e-06	5.29589	0.218553	5.02133e-05	0.000350307	3.45555	-0.268832	5.38336e-07	1.08401e-05	-4.96497	-0.282986	1.26074e-07	3.67439e-06	-5.43481	0.22946	2.03383e-05	0.000128529	3.891	0.219514	4.64517e-05	0.000274374	3.56166	-0.0955056	0.0786566	0.244299	-0.612079	-0.145358	0.00730407	0.0927284	-1.03279	0.0542362	0.318537	0.596416	0.224451	0.0169798	0.75495	0.895669
177	GO_AXON_CYTOPLASM	25	-0.0112967	0.835505	0.887387	-0.0518872	-0.0852876	0.116453	0.205532	-0.68712	-0.00395139	0.942102	0.959208	-0.0180873	4.54919e-05	0.999335	0.999786	9.27625e-05	0.0721521	0.184332	0.273473	0.563086	0.0295133	0.587426	0.671387	0.173027	-0.0431444	0.427595	0.526472	-0.278625	-0.0469843	0.387601	0.491493	-0.308483	-0.0714584	0.188595	0.402833	-0.394875	-0.0681918	0.209647	0.385091	-0.414437	-0.0652174	0.230246	0.513926	-0.289099	-0.0461701	0.395886	0.682934
178	GO_AXON_EXTENSION	26	0.151044	0.00529529	0.0141059	1.8506	0.228644	2.17951e-05	0.000324001	3.48945	0.293461	4.08966e-08	1.33215e-06	5.87545	0.267161	6.35699e-07	1.40807e-05	4.85137	-0.292829	4.38277e-08	1.59145e-06	-5.79821	-0.310617	5.87155e-09	3.21123e-07	-6.49333	0.287131	8.11752e-08	1.53909e-06	5.81274	0.27996	1.73103e-07	3.18193e-06	5.49731	-0.011772	0.828688	0.910152	-0.040886	-0.0397551	0.464807	0.624615	-0.204388	0.104796	0.0535707	0.266052	0.575034	0.0725007	0.182216	0.474833
179	GO_AXON_PART	140	0.0414074	0.446446	0.556414	0.254602	0.125933	0.0202442	0.0522036	1.2823	0.218367	5.0975e-05	0.000344762	3.46248	0.173586	0.00133096	0.00526911	2.27826	-0.246713	4.45169e-06	6.06799e-05	-4.21696	-0.244142	5.62214e-06	7.25912e-05	-4.13912	0.192987	0.000353063	0.00141545	2.84911	0.189611	0.000448951	0.00181299	2.7416	-0.0408829	0.452229	0.652353	-0.185517	-0.102894	0.0580775	0.197508	-0.704415	0.0781949	0.15016	0.417582	0.379258	0.0485072	0.37239	0.66284
180	GO_AXON_REGENERATION	17	0.0443214	0.415089	0.526174	0.27887	-0.0198956	0.714571	0.796364	-0.0988882	0.0838377	0.122812	0.198489	0.702264	0.0528381	0.331186	0.448533	0.348205	-0.062847	0.24766	0.34501	-0.462168	-0.0651814	0.230504	0.322429	-0.491567	0.0326135	0.548783	0.639092	0.194436	0.0326889	0.547858	0.641219	0.192994	-0.0911707	0.0932578	0.268442	-0.57115	-0.113883	0.0358646	0.162954	-0.787935	-0.0075019	0.890327	0.950397	-0.022095	-0.0161225	0.766956	0.899792
181	GO_AXONEME_ASSEMBLY	24	-0.0575467	0.289861	0.399481	-0.398503	0.041321	0.447395	0.568386	0.245357	-0.0256452	0.637326	0.723174	-0.140757	-0.0189134	0.72809	0.803348	-0.0950965	-0.0275251	0.612851	0.695067	-0.157973	-0.0624754	0.25047	0.344805	-0.462426	-0.0123524	0.820382	0.859973	-0.0655154	-0.00133667	0.980401	0.985741	-0.00623714	0.149544	0.00577014	0.0595845	1.22487	0.11802	0.0296237	0.1525	0.816731	0.121129	0.0255678	0.198303	0.70267	0.117059	0.0309827	0.214458
182	GO_B_CELL_ACTIVATION	75	0.0116887	0.829883	0.883533	0.0537774	0.0133072	0.806763	0.866625	0.0621689	0.0841882	0.121251	0.196611	0.706393	0.108768	0.0450946	0.0935687	1.02887	-0.00413305	0.939445	0.957155	-0.019018	-0.0303169	0.57729	0.662022	-0.179127	0.0631645	0.245275	0.337863	0.471259	0.0490428	0.36713	0.471826	0.326218	-0.0860222	0.113331	0.297075	-0.527134	-0.0570158	0.294339	0.46393	-0.333548	-0.0584419	0.282414	0.562547	-0.249841	-0.071096	0.190851	0.486223
183	GO_B_CELL_ACTIVATION_INVOLVED_IN_IMMUNE_RESPONSE	25	0.118455	0.0290242	0.0600828	1.22125	0.151796	0.00507082	0.0179626	1.74563	0.0894753	0.0995275	0.166758	0.777914	0.101946	0.0604399	0.118788	0.925226	-0.0366183	0.500789	0.596531	-0.224367	-0.0612798	0.259665	0.355255	-0.44946	0.141856	0.00885716	0.0214355	1.66887	0.133274	0.0139701	0.0319009	1.4962	0.0778083	0.15219	0.35578	0.448818	0.0921517	0.0897769	0.24452	0.611685	0.0730396	0.178981	0.451183	0.345647	0.0659884	0.224774	0.518889
184	GO_B_CELL_DIFFERENTIATION	50	-0.0700341	0.197575	0.293217	-0.532811	0.0955142	0.0786297	0.151448	0.819737	0.136643	0.0117151	0.0294206	1.53135	0.129886	0.0166142	0.0415589	1.38134	-0.0698051	0.199047	0.290441	-0.536943	-0.121507	0.025109	0.0556444	-1.25458	0.135101	0.0127039	0.0290066	1.5375	0.121289	0.0253724	0.0520128	1.28389	-0.0552474	0.309588	0.527085	-0.278119	-0.0618889	0.254952	0.426254	-0.370332	0.011228	0.836492	0.930135	0.031454	-0.0172109	0.751723	0.894063
185	GO_B_CELL_HOMEOSTASIS	15	-0.0683756	0.208419	0.30593	-0.514378	-0.032146	0.554528	0.663576	-0.178109	0.0721038	0.184626	0.274829	0.560937	0.0734093	0.176787	0.276541	0.55824	-0.0248453	0.647864	0.725856	-0.139149	-0.033919	0.532892	0.622879	-0.205596	0.0509449	0.348823	0.450389	0.346412	0.0378948	0.485972	0.584371	0.233311	-0.135771	0.0122651	0.0870745	-1.06011	-0.116566	0.031701	0.156057	-0.806716	-0.119364	0.0278068	0.204965	-0.688319	-0.13057	0.0160474	0.16727
186	GO_B_CELL_MEDIATED_IMMUNITY	33	-0.0610343	0.261581	0.370225	-0.431534	-0.0262382	0.629562	0.727808	-0.137983	-0.0789606	0.146198	0.228049	-0.641972	-0.0402356	0.459424	0.574767	-0.240508	0.0921551	0.0897652	0.154852	0.810083	0.0755008	0.164748	0.247905	0.605714	-0.0559255	0.30368	0.401344	-0.396483	-0.0613625	0.259021	0.354046	-0.45094	-0.0272433	0.616494	0.772142	-0.112303	0.0105386	0.846403	0.906075	0.0428358	-0.0431972	0.427029	0.683205	-0.165449	-0.0483457	0.373985	0.663404
187	GO_BAF_TYPE_COMPLEX	21	0.276555	2.46232e-07	2.34079e-06	5.63064	0.300448	1.88261e-08	2.55422e-06	5.59274	0.326663	8.53572e-10	8.40294e-08	7.07557	0.326069	9.18597e-10	1.62775e-07	6.78841	-0.268847	5.37533e-07	1.08401e-05	-4.96497	-0.309709	6.52641e-09	3.40141e-07	-6.46834	0.364526	5.54464e-12	1.06795e-09	8.97145	0.358281	1.34352e-11	2.77405e-09	8.55689	0.019844	0.715279	0.838577	0.0764573	8.30457e-05	0.998784	0.999383	0.000267933	0.107381	0.0479176	0.252787	0.597245	0.0790381	0.145802	0.431662
188	GO_BASAL_LAMINA	16	-0.0693948	0.201705	0.297752	-0.526145	-0.0473101	0.384315	0.5064	-0.295506	0.100299	0.0647295	0.11859	0.92595	0.113059	0.0372325	0.0796811	1.09864	-0.0793593	0.144167	0.22417	-0.649422	-0.0545	0.316187	0.414165	-0.382826	0.0437596	0.421031	0.520742	0.283378	0.0329353	0.544844	0.638365	0.194931	-0.125537	0.020643	0.114309	-0.941921	-0.095527	0.0785895	0.228596	-0.640932	-0.11241	0.0383408	0.233316	-0.632055	-0.120902	0.0258473	0.202697
189	GO_BASAL_PART_OF_CELL	31	-0.146925	0.00669167	0.017175	-1.7651	-0.0998942	0.0658206	0.131701	-0.880412	-0.00199401	0.970765	0.97909	-0.00917742	-0.0358611	0.50969	0.62219	-0.206077	0.0253421	0.641311	0.720473	0.142383	0.0510014	0.348288	0.446317	0.350357	-0.0700548	0.197442	0.283706	-0.547131	-0.0794097	0.143912	0.218857	-0.659839	-0.109644	0.0433852	0.176977	-0.752084	-0.11299	0.0373485	0.164877	-0.78284	-0.0965412	0.0754579	0.302788	-0.518861	-0.0994787	0.0669571	0.307697
190	GO_BASAL_PLASMA_MEMBRANE	17	-0.112341	0.0384603	0.0755058	-1.12202	-0.0431645	0.427379	0.548939	-0.260476	0.0208762	0.70116	0.776147	0.110056	-0.0116191	0.83088	0.88184	-0.0546102	-0.00233261	0.965803	0.976828	-0.0101819	0.0151561	0.780556	0.833823	0.0789261	-0.0241715	0.656795	0.730689	-0.136268	-0.0337477	0.534964	0.630289	-0.20046	-0.0669119	0.218341	0.437077	-0.359442	-0.0717979	0.186499	0.360625	-0.442944	-0.0318444	0.558252	0.771388	-0.112727	-0.0339596	0.532402	0.772279
191	GO_BASAL_TRANSCRIPTION_MACHINERY_BINDING	23	0.334383	3.24054e-10	7.10672e-09	8.14833	0.252341	2.64738e-06	7.37602e-05	4.13218	0.159207	0.00327531	0.0105142	1.97822	0.166556	0.00208523	0.00759669	2.11938	-0.134959	0.0127986	0.0339304	-1.46941	-0.134912	0.0128298	0.0330059	-1.48141	0.234184	1.35662e-05	9.13138e-05	4.03946	0.230814	1.81255e-05	0.000123533	3.90822	0.161384	0.00287062	0.0452557	1.34433	0.15746	0.00363662	0.0779136	1.10839	0.200973	0.00019683	0.0214263	1.66905	0.194241	0.000322598	0.028356
192	GO_BASE_EXCISION_REPAIR	38	0.30378	1.29137e-08	1.85739e-07	6.7311	0.173997	0.00129578	0.00634989	2.19723	0.159669	0.00318523	0.0102697	1.98844	0.151279	0.00522414	0.0161952	1.79061	-0.0761871	0.160934	0.244912	-0.61099	-0.0935366	0.085041	0.146588	-0.833901	0.190438	0.00042346	0.00165718	2.78063	0.18819	0.00049614	0.00196965	2.70561	0.0910697	0.0936225	0.268619	0.570863	0.109667	0.0433413	0.173318	0.761155	0.0822134	0.130253	0.388045	0.411118	0.086737	0.110357	0.380359
193	GO_BASEMENT_MEMBRANE	65	0.0535578	0.324635	0.436857	0.359661	0.142309	0.00864103	0.0270337	1.56809	0.179322	0.000911254	0.00367655	2.43456	0.155001	0.00420675	0.0136227	1.86574	-0.191818	0.000383885	0.00217748	-2.66205	-0.221802	3.85365e-05	0.000340752	-3.46756	0.180897	0.00081959	0.00291864	2.53482	0.173496	0.00133872	0.00452023	2.34484	0.00149177	0.978127	0.990876	0.00398058	-0.0315415	0.562002	0.703893	-0.152493	0.0918809	0.0907273	0.329867	0.481661	0.0680343	0.210703	0.506832
194	GO_BASOLATERAL_PLASMA_MEMBRANE	111	-0.122101	0.024403	0.0519753	-1.2842	-0.104205	0.054939	0.113995	-0.943114	0.0231759	0.670082	0.75037	0.124725	-0.00100571	0.985253	0.989946	-0.0043884	-0.0556247	0.306291	0.405278	-0.392247	-0.0307629	0.571699	0.657825	-0.18189	-0.0573333	0.291655	0.388636	-0.410457	-0.0600891	0.269051	0.365164	-0.437512	-0.137944	0.0109343	0.0815895	-1.08837	-0.134124	0.0133676	0.116802	-0.932549	-0.0979722	0.0712129	0.29613	-0.528517	-0.110719	0.0413628	0.243494
195	GO_BEHAVIOR	277	0.0446016	0.412143	0.523097	0.281417	0.122672	0.0237401	0.0594509	1.22584	0.257803	1.58034e-06	2.12148e-05	4.67336	0.225251	2.89751e-05	0.000229324	3.63955	-0.267426	6.19209e-07	1.22203e-05	-4.91292	-0.252858	2.52245e-06	3.8138e-05	-4.41864	0.21668	5.83872e-05	0.000318541	3.49683	0.206339	0.000131254	0.000643472	3.19147	-0.0875006	0.107248	0.287885	-0.54078	-0.120139	0.0268035	0.146773	-0.833353	0.0424144	0.435461	0.689207	0.16165	0.00629987	0.907814	0.963674
196	GO_BETA_AMYLOID_BINDING	22	-0.18621	0.000569645	0.00208901	-2.68006	-0.113256	0.0369015	0.0842213	-1.07458	-0.0802017	0.139947	0.220159	-0.657264	-0.10368	0.0561788	0.111903	-0.951159	0.0399624	0.462481	0.560238	0.251627	0.029847	0.583207	0.667253	0.175709	-0.124114	0.0221344	0.0460571	-1.3367	-0.116217	0.0322189	0.0636902	-1.19593	-0.045143	0.406488	0.615007	-0.21112	-0.0468955	0.388499	0.553393	-0.256966	-0.0449558	0.408438	0.669149	-0.174477	-0.0502888	0.355071	0.648646
197	GO_BETA_CATENIN_BINDING	68	0.0700994	0.197156	0.292865	0.533332	0.100264	0.0648228	0.130174	0.885474	0.19945	0.000220412	0.00111976	2.95088	0.163271	0.0025573	0.00905973	2.04288	-0.225784	2.77164e-05	0.000281614	-3.55035	-0.223222	3.42857e-05	0.00031179	-3.50614	0.171911	0.00148343	0.0047863	2.32	0.166768	0.00205763	0.00644645	2.19068	-0.0542832	0.318118	0.534621	-0.271954	-0.0818144	0.132134	0.299413	-0.523729	0.0371465	0.494629	0.725085	0.139611	0.0146368	0.787894	0.907915
198	GO_BETA_CATENIN_DESTRUCTION_COMPLEX_DISASSEMBLY	16	-0.106271	0.050281	0.0947448	-1.02344	-0.144739	0.0075597	0.0242478	-1.61533	0.00865965	0.873533	0.910458	0.0407399	-0.000311727	0.995431	0.997231	-0.00120406	0.014006	0.79683	0.847936	0.0716368	0.00108509	0.984089	0.98945	0.00460618	-0.0690864	0.20372	0.29131	-0.535644	-0.0722693	0.183618	0.268104	-0.571696	-0.185766	0.000587424	0.0240952	-1.61807	-0.178094	0.000989171	0.0564122	-1.24863	-0.170644	0.0016093	0.0528088	-1.27729	-0.17999	0.000871269	0.0415024
199	GO_BETA_CATENIN_TCF_COMPLEX_ASSEMBLY	40	0.386714	1.82012e-13	2.44338e-11	10.612	0.218345	5.10619e-05	0.000578527	3.23768	0.219913	4.49668e-05	0.000316195	3.50005	0.261761	1.07961e-06	2.07942e-05	4.68206	-0.14371	0.0080017	0.0235219	-1.62853	-0.157095	0.00371665	0.0124169	-1.90599	0.267086	6.4043e-07	7.96939e-06	5.09857	0.261101	1.15085e-06	1.4241e-05	4.84646	0.075019	0.167465	0.376393	0.424359	0.112672	0.0378899	0.164879	0.782834	0.0929568	0.0869986	0.322437	0.491556	0.0973973	0.0728943	0.319499
200	GO_BETA_TUBULIN_BINDING	33	0.0643204	0.23673	0.341379	0.466764	0.13795	0.0109311	0.0322617	1.49131	0.145443	0.00726978	0.0201913	1.69484	0.149123	0.00591013	0.0179697	1.74546	-0.151124	0.00527089	0.0166667	-1.77815	-0.128043	0.0182291	0.0432539	-1.36398	0.161611	0.00283119	0.00822977	2.08461	0.153581	0.00457154	0.0125981	1.8997	0.0557911	0.304845	0.522788	0.281674	0.0183961	0.735244	0.833452	0.0791194	0.115063	0.0339787	0.225001	0.647816	0.0938978	0.0838396	0.334565
201	GO_BHLH_TRANSCRIPTION_FACTOR_BINDING	24	-0.185646	0.000592336	0.00215971	-2.6656	-0.0666069	0.220451	0.335023	-0.474926	0.0984043	0.0699704	0.126312	0.898556	0.027697	0.610634	0.709424	0.149094	-0.110193	0.042342	0.0856855	-1.06709	-0.0691584	0.203248	0.291577	-0.535247	0.0372066	0.49393	0.590743	0.228601	0.028023	0.606438	0.69009	0.161094	-0.18443	0.000644179	0.024601	-1.60905	-0.20077	0.000199832	0.0402389	-1.39535	-0.121364	0.0252824	0.197569	-0.704282	-0.152791	0.00478671	0.094245
202	GO_BICARBONATE_TRANSPORT	19	-0.233036	1.49805e-05	8.84847e-05	-4.05313	-0.0850889	0.117309	0.206632	-0.684803	-0.082614	0.128387	0.206004	-0.686124	-0.129186	0.0172119	0.0426686	-1.36989	0.0116508	0.830425	0.873691	0.0586424	-0.00391353	0.942656	0.960213	-0.0176324	-0.113214	0.0369726	0.0708122	-1.14989	-0.111646	0.0396814	0.0758363	-1.12012	-0.0816947	0.132702	0.327916	-0.484238	-0.0988091	0.0688222	0.215336	-0.666884	-0.0460992	0.396612	0.66044	-0.180167	-0.055164	0.310319	0.611597
203	GO_BICELLULAR_TIGHT_JUNCTION_ASSEMBLY	22	0.0811811	0.135161	0.214303	0.668972	0.0806413	0.137783	0.23431	0.630208	0.151683	0.005104	0.0150738	1.82178	0.113732	0.0361123	0.0778101	1.10896	-0.17025	0.00165044	0.00682038	-2.16619	-0.183181	0.000701767	0.00332851	-2.47775	0.134287	0.0132548	0.0300317	1.52242	0.128778	0.017569	0.0385631	1.41383	-0.0548285	0.313275	0.529092	-0.276469	-0.0679326	0.211387	0.387281	-0.411974	0.0393533	0.469335	0.712246	0.14737	0.0151565	0.780552	0.904488
204	GO_BILE_ACID_METABOLIC_PROCESS	16	-0.164407	0.00238405	0.00713124	-2.14684	-0.104991	0.0531254	0.111538	-0.952577	-0.16762	0.00195025	0.00687868	-2.16249	-0.153185	0.00467842	0.0148569	-1.82807	0.08653	0.111212	0.18256	0.738593	0.0670454	0.217423	0.307408	0.512285	-0.164744	0.0023347	0.00698272	-2.15598	-0.160468	0.00303493	0.00895121	-2.04812	-0.0108445	0.842002	0.914781	-0.0386831	-0.0217812	0.688867	0.799917	-0.0969552	0.0267502	0.62289	0.8059	0.0937186	0.0273804	0.614721	0.821358
205	GO_BINDING_BRIDGING	124	-0.014201	0.794168	0.857392	-0.0668206	-0.0243544	0.654525	0.748849	-0.125605	0.098382	0.0700185	0.126347	0.898435	0.0850637	0.117452	0.202141	0.694345	-0.0902423	0.0966635	0.164069	-0.784974	-0.101306	0.062053	0.114444	-0.941406	0.0391104	0.472277	0.571012	0.243355	0.033016	0.544044	0.637766	0.195339	-0.129421	0.0169559	0.103774	-0.983911	-0.12987	0.0165741	0.127332	-0.895062	-0.0416839	0.443607	0.694711	-0.158196	-0.0593372	0.275248	0.576524
206	GO_BIOLOGICAL_ADHESION	558	0.00298569	0.956301	0.97322	0.0117892	0.0494189	0.364174	0.487694	0.311853	0.120547	0.0265116	0.0579705	1.23679	0.0849579	0.118421	0.203335	0.691788	-0.13921	0.0103318	0.0287319	-1.54163	-0.148381	0.00624089	0.0186053	-1.73036	0.0951224	0.0803151	0.134925	0.869909	0.0862137	0.113061	0.180817	0.742762	-0.0851316	0.117668	0.303593	-0.517709	-0.104112	0.0555185	0.194349	-0.711417	0.0423476	0.436864	0.689385	0.161538	0.0166189	0.760342	0.897011
207	GO_BIOMINERAL_TISSUE_DEVELOPMENT	41	-0.182119	0.000754466	0.00265472	-2.57598	-0.167702	0.00194029	0.00856126	-2.06746	-0.134116	0.0133734	0.0327677	-1.48455	-0.138989	0.010341	0.0283889	-1.54685	0.0912132	0.093105	0.159557	0.797084	0.0790565	0.145708	0.224737	0.648325	-0.172805	0.00140013	0.00457148	-2.33994	-0.177507	0.00102856	0.00362491	-2.4407	-0.144827	0.00752293	0.067737	-1.16917	-0.131037	0.0156702	0.125532	-0.901247	-0.101231	0.062271	0.283654	-0.547211	-0.110006	0.0426941	0.246877
208	GO_BLASTOCYST_DEVELOPMENT	48	0.238201	9.5516e-06	5.91798e-05	4.22783	0.0924885	0.0886063	0.166081	0.779681	0.0319579	0.556848	0.650194	0.186957	0.0763975	0.159779	0.255946	0.591852	0.0523884	0.335322	0.434604	0.361906	0.00841448	0.877085	0.911573	0.0402085	0.0785814	0.14815	0.222778	0.652127	0.0764423	0.159533	0.238358	0.62277	0.0503825	0.354174	0.566361	0.246907	0.0952482	0.0794684	0.229944	0.638377	0.0200781	0.712067	0.859291	0.0658597	0.0401859	0.45998	0.724134
209	GO_BLASTOCYST_FORMATION	22	-0.124149	0.0220969	0.0477981	-1.32059	-0.109169	0.0443042	0.0969341	-1.01352	-0.190264	0.000428694	0.0019359	-2.71312	-0.155915	0.00398609	0.0130417	-1.88467	0.155693	0.00403871	0.0135003	1.86966	0.12243	0.0240182	0.0538466	1.26884	-0.179981	0.000871806	0.00307982	-2.51147	-0.170243	0.00165118	0.00537848	-2.26934	0.00709552	0.896233	0.948701	0.0228707	0.0187579	0.730237	0.830113	0.0808626	-0.0411253	0.449551	0.699021	-0.15551	-0.0292251	0.591081	0.813196
210	GO_BLASTOCYST_GROWTH	15	0.335365	2.85933e-10	6.36525e-09	8.19618	0.218832	4.90922e-05	0.00056413	3.24862	0.201945	0.000183048	0.000960787	3.01737	0.205814	0.000136619	0.000801622	3.09603	-0.119143	0.0280984	0.0619899	-1.20768	-0.147598	0.00644321	0.0190544	-1.72001	0.253665	2.33849e-06	2.2117e-05	4.65527	0.252336	2.64858e-06	2.70351e-05	4.56807	0.066406	0.221848	0.440317	0.356234	0.0812297	0.134927	0.30234	0.519505	0.0704392	0.194989	0.467932	0.329818	0.0753225	0.16575	0.456636
211	GO_BLOC_COMPLEX	17	0.0121302	0.823561	0.879126	0.0559488	-0.0211388	0.697585	0.783545	-0.105936	0.0599037	0.270533	0.372887	0.428423	0.063068	0.245998	0.358831	0.44511	-0.0397881	0.464437	0.561993	-0.250269	-0.0607971	0.263442	0.359313	-0.444527	0.0203474	0.70838	0.771987	0.11239	0.0233392	0.667895	0.741547	0.129861	-0.076944	0.156806	0.360483	-0.443115	-0.104493	0.0542682	0.192789	-0.714917	-0.0417982	0.442164	0.693375	-0.159032	-0.0435535	0.423223	0.699402
212	GO_BLOOD_MICROPARTICLE	46	-0.151407	0.00518588	0.0138896	-1.85731	-0.104666	0.0538707	0.112637	-0.948317	-0.190605	0.000418457	0.00190325	-2.7205	-0.20486	0.000146908	0.00085407	-3.06851	0.122944	0.0234294	0.0540585	1.26714	0.108221	0.0461901	0.0910646	1.04065	-0.185987	0.000578508	0.0021514	-2.66728	-0.17993	0.0008748	0.00316356	-2.49982	0.0110487	0.839066	0.914037	0.039036	-0.000829236	0.987841	0.994125	-0.00255917	0.00972978	0.858061	0.938618	0.027511	0.0111272	0.837939	0.930809
213	GO_BLOOD_VESSEL_ENDOTHELIAL_CELL_MIGRATION	18	0.00404542	0.940727	0.964904	0.0155159	0.144906	0.00748988	0.0241067	1.61786	0.173583	0.00133117	0.00501879	2.2994	0.137219	0.0113635	0.0305464	1.51504	-0.163656	0.00249733	0.00938917	-2.02737	-0.198938	0.000228917	0.0013835	-2.85902	0.161071	0.00292579	0.00844932	2.07318	0.153659	0.00455082	0.0125608	1.90098	-0.0715512	0.18802	0.402382	-0.395362	-0.0806914	0.137538	0.306178	-0.514026	0.0514236	0.344308	0.618353	0.208764	0.018735	0.730554	0.886975
214	GO_BLOOD_VESSEL_MORPHOGENESIS	273	-0.0759777	0.162091	0.249674	-0.602627	-0.0316331	0.560867	0.669173	-0.174462	0.0490602	0.36696	0.471615	0.326412	0.0228919	0.67389	0.760014	0.119179	-0.0330033	0.544013	0.633704	-0.198114	-0.0503165	0.354805	0.452965	-0.343936	0.010214	0.851077	0.88504	0.053037	0.00151955	0.97772	0.984408	0.00682478	-0.13658	0.0117543	0.0851675	-1.06973	-0.110035	0.0426392	0.172662	-0.762804	-0.0510304	0.348014	0.620887	-0.206988	-0.0740929	0.172782	0.465508
215	GO_BLOOD_VESSEL_REMODELING	24	-0.30639	9.58025e-09	1.42574e-07	-6.84596	-0.0805116	0.138419	0.235212	-0.628541	-0.031859	0.55807	0.651278	-0.186233	-0.0662076	0.223235	0.332861	-0.477737	0.0613723	0.258945	0.357217	0.447068	0.0447592	0.410492	0.507247	0.294781	-0.0700948	0.197185	0.28343	-0.547554	-0.0755963	0.164213	0.244115	-0.612405	-0.16009	0.00310538	0.0465824	-1.33178	-0.116492	0.0318103	0.156057	-0.806716	-0.108821	0.04499	0.247624	-0.606207	-0.131135	0.0155921	0.165553
216	GO_BODY_FLUID_SECRETION	45	0.00185815	0.972756	0.982395	0.00771399	-0.0355964	0.512821	0.629262	-0.201169	0.0239633	0.659565	0.741781	0.129725	0.0356352	0.512362	0.624763	0.204285	0.0159017	0.770057	0.825993	0.0830235	-0.0124071	0.819601	0.86469	-0.0631397	-0.0188407	0.729094	0.788739	-0.103067	-0.0140295	0.796497	0.844538	-0.0733806	-0.0901867	0.0968572	0.272501	-0.564632	-0.0675555	0.213937	0.3905	-0.408379	-0.0688049	0.205572	0.483377	-0.315714	-0.0709357	0.191855	0.486501
217	GO_BODY_MORPHOGENESIS	35	-0.0700936	0.197193	0.292865	-0.533332	-0.0225356	0.678681	0.767174	-0.115106	-0.0366338	0.500607	0.598228	-0.223134	-0.0322263	0.553539	0.661321	-0.179588	-0.0123323	0.82067	0.866535	-0.062214	-0.0429468	0.429716	0.52674	-0.278403	-0.0388608	0.474917	0.573166	-0.24172	-0.0418373	0.441737	0.544489	-0.264011	-0.0150239	0.782422	0.880175	-0.0554308	-0.00286172	0.958052	0.97611	-0.0105014	0.00919701	0.865757	0.94141	0.0262211	-0.00206546	0.969718	0.985061
218	GO_BONE_CELL_DEVELOPMENT	19	0.0594903	0.273857	0.381866	0.418089	0.156597	0.00382821	0.0144086	1.84138	0.261948	1.06011e-06	1.58124e-05	4.801	0.238602	9.21965e-06	9.77107e-05	4.01006	-0.227397	2.4211e-05	0.00025098	-3.60036	-0.221128	4.07238e-05	0.000353791	-3.45125	0.229047	2.10632e-05	0.000132543	3.87764	0.217792	5.33943e-05	0.000308392	3.5109	-0.0646245	0.234518	0.454258	-0.342697	-0.0873085	0.108023	0.271129	-0.566824	0.0214383	0.693516	0.848694	0.0712487	-0.0200213	0.712846	0.878172
219	GO_BONE_DEVELOPMENT	108	-0.0714834	0.18844	0.283075	-0.548099	-0.00142857	0.979053	0.987075	-0.00564996	0.0784235	0.148968	0.231311	0.635804	0.0448117	0.409943	0.528485	0.276967	-0.12805	0.0182222	0.0443864	-1.35275	-0.117144	0.0308609	0.0659179	-1.181	0.0351998	0.517531	0.611051	0.213923	0.0303727	0.576588	0.665351	0.176949	-0.110111	0.0424962	0.174961	-0.757059	-0.132887	0.0142518	0.119441	-0.922847	-0.0199087	0.714391	0.86091	-0.0650422	-0.0527496	0.331997	0.628968
220	GO_BONE_MINERALIZATION	21	-0.126841	0.0193543	0.0426841	-1.36973	-0.207081	0.000123999	0.00105841	-2.97535	-0.173974	0.00129771	0.00491777	-2.30823	-0.179332	0.000910658	0.00381571	-2.41842	0.0920653	0.0900793	0.155273	0.808905	0.0915158	0.0920215	0.15613	0.806514	-0.212752	7.97835e-05	0.000409075	-3.3882	-0.20666	0.000128064	0.000631059	-3.19993	-0.121841	0.0247103	0.129086	-0.889122	-0.125343	0.0208415	0.135577	-0.867815	-0.093242	0.0860313	0.321348	-0.493024	-0.092988	0.0868925	0.341584
221	GO_BONE_MORPHOGENESIS	50	-0.131031	0.0156756	0.0355752	-1.44885	-0.0651417	0.230788	0.346221	-0.460646	0.0408451	0.452648	0.551646	0.25834	-0.00807436	0.882016	0.916354	-0.0379369	-0.0757151	0.16355	0.248125	-0.605329	-0.0428583	0.430668	0.527324	-0.277922	-0.0145788	0.788714	0.836047	-0.0777693	-0.0243678	0.654188	0.732116	-0.13542	-0.156603	0.00382689	0.0511117	-1.29148	-0.155797	0.00401395	0.0804187	-1.09464	-0.0594064	0.274536	0.558068	-0.253313	-0.09257	0.0883247	0.344439
222	GO_BONE_REMODELING	27	-0.308572	7.4471e-09	1.14051e-07	-6.9429	-0.264659	8.13598e-07	3.37825e-05	-4.47131	-0.225208	2.90799e-05	0.000227604	-3.64282	-0.232942	1.5102e-05	0.000141143	-3.85034	0.175566	0.00116931	0.00518521	2.28523	0.15696	0.00374654	0.0124767	1.9039	-0.292251	4.66835e-08	1.00392e-06	-5.9983	-0.290185	5.84327e-08	1.35527e-06	-5.86797	-0.164131	0.00242509	0.0417201	-1.37965	-0.136663	0.0117028	0.113054	-0.946716	-0.147092	0.00662919	0.100919	-0.996029	-0.144672	0.00758776	0.122181
223	GO_BONE_RESORPTION	18	-0.282506	1.32603e-07	1.3598e-06	-5.86653	-0.200652	0.000201594	0.00155045	-2.80954	-0.167622	0.0019501	0.00687868	-2.16249	-0.184802	0.000627882	0.00278989	-2.55441	0.127214	0.0189987	0.045866	1.33851	0.105073	0.0529402	0.100828	0.99642	-0.231405	1.72322e-05	0.000111119	-3.95421	-0.233579	1.42951e-05	0.000102971	-3.98729	-0.115702	0.0329946	0.149821	-0.824426	-0.111887	0.0392549	0.16689	-0.77757	-0.0947613	0.0810229	0.312658	-0.50493	-0.102485	0.0590876	0.287963
224	GO_BRAIN_MORPHOGENESIS	19	-0.0289271	0.594872	0.692766	-0.159413	0.0293704	0.589237	0.694049	0.15861	0.0503092	0.354875	0.459947	0.337292	0.0604145	0.266463	0.380293	0.419881	-0.104316	0.0546802	0.105152	-0.978183	-0.133832	0.013572	0.0344157	-1.46324	0.0293982	0.588885	0.672707	0.172174	0.0311376	0.567023	0.657913	0.181832	-0.0135242	0.803674	0.892635	-0.0493259	-0.0445314	0.41288	0.576081	-0.239516	0.0365893	0.501129	0.730263	0.13652	0.011584	0.831384	0.928651
225	GO_BRANCHED_CHAIN_AMINO_ACID_METABOLIC_PROCESS	23	0.0101954	0.851345	0.897967	0.0467398	0.111121	0.0406269	0.0910355	1.04079	0.0181308	0.738923	0.808254	0.0924524	0.031285	0.565188	0.670895	0.173345	-0.0900316	0.0974345	0.165061	-0.782355	-0.100232	0.064908	0.118589	-0.925955	0.0648761	0.232698	0.323893	0.489599	0.0678004	0.212279	0.301593	0.520578	0.107875	0.0468946	0.185928	0.730654	0.0707461	0.193047	0.36767	0.434542	0.157961	0.00352963	0.0737279	1.13237	0.144952	0.00747087	0.120788
226	GO_BRANCHING_INVOLVED_IN_MAMMARY_GLAND_DUCT_MORPHOGENESIS	17	-0.0978742	0.0714973	0.127502	-0.894482	-0.0116832	0.829961	0.882405	-0.0543322	-0.0227994	0.675133	0.755262	-0.121902	-0.0585542	0.281488	0.397258	-0.400927	-0.00760876	0.888774	0.920065	-0.0361813	-0.0395585	0.46702	0.562353	-0.249991	-0.0373092	0.49274	0.589911	-0.229214	-0.0384764	0.479299	0.57887	-0.237419	0.00414679	0.939244	0.970921	0.0128161	-0.00711842	0.8959	0.940037	-0.0268548	0.0634436	0.243193	0.526561	0.278551	0.0457854	0.399837	0.686542
227	GO_BRANCHING_INVOLVED_IN_URETERIC_BUD_MORPHOGENESIS	31	-0.148892	0.00598806	0.0156502	-1.80548	-0.135494	0.012445	0.0355577	-1.44907	-0.0426779	0.432612	0.533391	-0.272955	-0.0666103	0.220428	0.329452	-0.482208	0.0435242	0.423536	0.522927	0.281559	-0.00261899	0.961607	0.974141	-0.0113781	-0.125595	0.0205847	0.0433414	-1.3631	-0.128332	0.0179665	0.0392657	-1.40599	-0.156304	0.00389539	0.0515121	-1.28809	-0.168513	0.00184325	0.0633322	-1.19838	-0.101713	0.0610313	0.281341	-0.550767	-0.106088	0.0506784	0.267587
228	GO_BRANCHING_MORPHOGENESIS_OF_AN_EPITHELIAL_TUBE	96	-0.087122	0.108781	0.179947	-0.744855	-0.0155427	0.775108	0.842426	-0.0744683	0.0791966	0.144994	0.226648	0.644647	0.0415048	0.445376	0.561793	0.250424	-0.0659245	0.225223	0.320096	-0.49472	-0.11828	0.0292637	0.0631457	-1.19966	0.0237376	0.662572	0.734897	0.133773	0.0171834	0.752106	0.813038	0.089889	-0.153404	0.00461899	0.0550081	-1.25957	-0.15998	0.00312598	0.0765048	-1.11631	-0.0434344	0.424493	0.680602	-0.167106	-0.0674252	0.214824	0.512478
229	GO_BROWN_FAT_CELL_DIFFERENTIATION	17	-0.233629	1.42334e-05	8.45694e-05	-4.07279	-0.189747	0.000444684	0.00283446	-2.54753	-0.102064	0.0601414	0.111709	-0.951911	-0.0837586	0.123166	0.209615	-0.678578	0.136755	0.0116462	0.0315358	1.5012	0.11437	0.0350752	0.0734326	1.13411	-0.170261	0.00164928	0.00524879	-2.27994	-0.181005	0.000813675	0.00298392	-2.52521	-0.169959	0.00168144	0.03544	-1.45051	-0.126403	0.0197788	0.134106	-0.872552	-0.180641	0.000833889	0.04065	-1.39094	-0.175621	0.00116509	0.0460345
230	GO_BRUSH_BORDER	58	-0.011624	0.83081	0.884308	-0.0533965	-0.00412053	0.939628	0.960442	-0.017529	0.0468796	0.38866	0.493201	0.306976	0.0175984	0.746323	0.816349	0.0881244	-0.035038	0.519459	0.613982	-0.211844	-0.100355	0.0645791	0.11812	-0.927678	0.00885719	0.870673	0.901187	0.0451849	0.0080939	0.881733	0.910932	0.0405141	-0.0995816	0.0666742	0.224956	-0.647903	-0.11302	0.037299	0.164877	-0.78284	-0.0249873	0.645988	0.821391	-0.0854498	-0.0359722	0.508379	0.757779
231	GO_BRUSH_BORDER_MEMBRANE	26	-0.150348	0.00551091	0.0145751	-1.83639	-0.113637	0.0362682	0.0830312	-1.08076	-0.0692052	0.202942	0.295346	-0.529669	-0.0954961	0.0786863	0.146217	-0.835003	0.046683	0.390654	0.491229	0.308716	0.000762677	0.988817	0.992901	0.00309411	-0.116923	0.0311792	0.0613198	-1.2124	-0.113668	0.0362163	0.0703677	-1.15263	-0.122787	0.0236077	0.124651	-0.904305	-0.133065	0.0141217	0.119059	-0.924239	-0.0909008	0.0942342	0.338022	-0.471055	-0.0955963	0.0783722	0.328008
232	GO_CADHERIN_BINDING	19	0.132392	0.0146202	0.033541	1.47442	0.072298	0.183444	0.291693	0.535074	0.192768	0.00035865	0.00168284	2.77396	0.188872	0.000472951	0.00218703	2.66015	-0.162776	0.00263637	0.00969801	-2.01332	-0.14649	0.00685693	0.020068	-1.6975	0.159029	0.00331046	0.0093529	2.02905	0.14453	0.00764753	0.019282	1.71485	-0.0997965	0.0660864	0.223996	-0.64976	-0.10694	0.0488451	0.183843	-0.735552	-0.00097426	0.985715	0.994696	-0.00230961	-0.0165633	0.760775	0.897047
233	GO_CAJAL_BODY	48	0.169432	0.00171643	0.00537751	2.26942	-0.0208425	0.701762	0.78684	-0.104113	-0.0661885	0.223492	0.320514	-0.494153	-0.0330832	0.543225	0.652518	-0.185408	0.132931	0.014167	0.0365931	1.4366	0.111961	0.0390798	0.0799647	1.0971	-0.0439721	0.41897	0.519461	-0.284447	-0.0399317	0.463019	0.564906	-0.248024	0.0182432	0.737492	0.852529	0.0692911	0.0576128	0.289465	0.458959	0.338226	-0.0244556	0.653183	0.825092	-0.0834974	0.00271624	0.960202	0.980792
234	GO_CALCIUM_CHANNEL_COMPLEX	29	0.12876	0.0175849	0.0393199	1.40539	0.226298	2.65496e-05	0.000366402	3.43604	0.20992	9.95788e-05	0.000589752	3.22933	0.185465	0.000599788	0.0026839	2.57123	-0.252486	2.61167e-06	3.87266e-05	-4.41199	-0.248312	3.84536e-06	5.31094e-05	-4.27483	0.243118	6.16587e-06	4.77532e-05	4.321	0.24385	5.7727e-06	4.9179e-05	4.30822	0.0954949	0.0786902	0.244299	0.612079	0.0461991	0.395589	0.560608	0.251341	0.142368	0.00861311	0.113103	0.946527	0.106259	0.0503076	0.26701
235	GO_CALCIUM_CHANNEL_REGULATOR_ACTIVITY	21	-0.0943729	0.0822802	0.143448	-0.843306	-0.0682114	0.209516	0.322725	-0.491168	0.00829541	0.878811	0.914955	0.0386005	-0.038968	0.473699	0.588141	-0.230518	-0.013985	0.797129	0.847944	-0.0716329	-0.0418593	0.441497	0.537759	-0.269412	-0.0441687	0.416699	0.51737	-0.286199	-0.0506951	0.351193	0.454908	-0.342077	-0.0532124	0.327768	0.54225	-0.265801	-0.0910737	0.0936081	0.250868	-0.600556	0.0267999	0.622243	0.805836	0.0937532	0.0170949	0.753342	0.895037
236	GO_CALCIUM_DEPENDENT_PHOSPHOLIPID_BINDING	24	-0.0284374	0.601125	0.698579	-0.155785	-0.126797	0.0193966	0.0506048	-1.29581	0.038001	0.484749	0.582909	0.234399	0.0176005	0.746293	0.816349	0.0881244	-0.0349454	0.520563	0.615123	-0.211038	0.0192843	0.722974	0.784994	0.105134	-0.0416511	0.443773	0.542322	-0.265743	-0.0521093	0.337906	0.442091	-0.354488	-0.141678	0.00894358	0.0737803	-1.13206	-0.127598	0.0186388	0.13171	-0.88038	-0.127895	0.0183643	0.167967	-0.774777	-0.127646	0.0185943	0.180897
237	GO_CALCIUM_DEPENDENT_PROTEIN_BINDING	39	-0.0416312	0.443991	0.554621	-0.256003	-0.0928185	0.0874709	0.16451	-0.783807	-0.00363417	0.946743	0.961827	-0.0169029	-0.0406909	0.454357	0.570038	-0.244096	-0.0136882	0.801344	0.850288	-0.070434	-0.0101157	0.852494	0.892379	-0.0494506	-0.0797953	0.141971	0.214873	-0.667819	-0.085157	0.117015	0.185865	-0.730802	-0.104944	0.0532345	0.198188	-0.702923	-0.134776	0.0129216	0.11542	-0.937718	-0.00807711	0.881976	0.946719	-0.0237787	-0.0149412	0.783591	0.905401
238	GO_CALCIUM_ION_BINDING	336	0.0314969	0.562555	0.665097	0.177115	0.103726	0.0560698	0.115907	0.93589	0.174212	0.00127771	0.00486276	2.31312	0.135784	0.0122569	0.0324943	1.48819	-0.193955	0.000329312	0.00194513	-2.71105	-0.216144	6.09461e-05	0.000483855	-3.31528	0.150631	0.00542233	0.014222	1.84704	0.144759	0.007551	0.0190604	1.71987	-0.0453692	0.404138	0.613337	-0.212301	-0.0854403	0.115799	0.280168	-0.552581	0.0756595	0.16386	0.437429	0.359092	0.0477635	0.379772	0.669162
239	GO_CALCIUM_ION_IMPORT	36	-0.0214655	0.693147	0.776591	-0.109808	0.048332	0.374121	0.497406	0.303289	0.118934	0.028377	0.0612623	1.21281	0.109151	0.04434	0.0922189	1.03518	-0.143276	0.00819501	0.0239471	-1.62075	-0.147339	0.00653785	0.0193213	-1.71396	0.0980425	0.0710097	0.121666	0.914832	0.0902301	0.0966963	0.15954	0.797131	-0.0464934	0.392583	0.60366	-0.219208	-0.0677861	0.212376	0.388449	-0.410665	0.023879	0.660688	0.82984	0.0810056	0.00222727	0.967346	0.983554
240	GO_CALCIUM_ION_IMPORT_INTO_CYTOSOL	24	-0.176748	0.00108164	0.00363005	-2.44009	-0.00997464	0.854528	0.901968	-0.0448091	0.0282209	0.603898	0.694875	0.158093	-0.00350196	0.948678	0.964352	-0.0157646	-0.0433648	0.425236	0.524294	-0.280425	-0.057485	0.290379	0.387803	-0.411389	0.00594113	0.913043	0.934993	0.0291918	-0.00355509	0.947901	0.961575	-0.0170167	-0.0431126	0.427936	0.634244	-0.197744	-0.0719072	0.185828	0.359656	-0.444113	0.0243415	0.654536	0.825861	0.0830933	0.00128935	0.981095	0.989583
241	GO_CALCIUM_ION_REGULATED_EXOCYTOSIS	40	0.171767	0.0014973	0.00476513	2.32193	0.0892274	0.100472	0.182714	0.738229	0.304088	1.24675e-08	5.46842e-07	6.26214	0.2789	1.93262e-07	6.06474e-06	5.21719	-0.292263	4.66183e-08	1.66547e-06	-5.77846	-0.244113	5.63688e-06	7.25912e-05	-4.13912	0.227907	2.31943e-05	0.000144313	3.8407	0.221803	3.85337e-05	0.000233521	3.63167	-0.139809	0.00989555	0.0775881	-1.1102	-0.15149	0.00516103	0.0819561	-1.08642	-0.0392501	0.470502	0.712345	-0.147309	-0.0640695	0.238567	0.53593
242	GO_CALCIUM_ION_TRANSMEMBRANE_TRANSPORT	72	0.0186893	0.731187	0.808942	0.0920825	0.179228	0.000916977	0.00487502	2.31202	0.266516	6.77604e-07	1.1334e-05	4.94562	0.22792	2.31674e-05	0.000192917	3.71463	-0.297004	2.76648e-08	1.09424e-06	-5.96089	-0.296107	3.05563e-08	1.14716e-06	-5.94038	0.253295	2.42127e-06	2.2725e-05	4.6435	0.243369	6.02803e-06	5.09622e-05	4.29275	-0.00784843	0.885295	0.943207	-0.025393	-0.0682452	0.209289	0.38471	-0.414866	0.106183	0.0504724	0.257299	0.589562	0.0623774	0.251215	0.549572
243	GO_CALCIUM_ION_TRANSMEMBRANE_TRANSPORTER_ACTIVITY	58	0.0445943	0.41222	0.523097	0.281417	0.192324	0.00037025	0.00247766	2.60596	0.290589	5.59287e-08	1.73262e-06	5.7613	0.245218	5.10054e-06	6.6457e-05	4.17746	-0.325971	9.29705e-10	9.80617e-08	-7.0085	-0.316609	2.8951e-09	1.82171e-07	-6.73952	0.279421	1.83087e-07	2.94936e-06	5.53027	0.27185	3.97649e-07	6.20276e-06	5.20741	-0.0101569	0.8519	0.921591	-0.0354617	-0.0704469	0.194941	0.370003	-0.431795	0.0982309	0.070467	0.295842	0.52894	0.0571748	0.292993	0.592905
244	GO_CALCIUM_ION_TRANSPORT	103	-0.0125634	0.817368	0.873779	-0.0585986	0.109426	0.0438043	0.0963367	1.01621	0.200154	0.000209214	0.0010727	2.96952	0.155365	0.00411766	0.0133733	1.87376	-0.234923	1.27244e-05	0.000145656	-3.83667	-0.252523	2.60259e-06	3.88007e-05	-4.41116	0.172385	0.00143876	0.00466595	2.33106	0.167449	0.00197142	0.00623367	2.20526	-0.0409736	0.451226	0.651755	-0.185915	-0.091262	0.0929294	0.249969	-0.602113	0.0742865	0.17166	0.446313	0.350361	0.0386501	0.477316	0.733195
245	GO_CALCIUM_MEDIATED_SIGNALING	50	0.0891715	0.100686	0.169078	0.771912	0.193721	0.000334923	0.00231468	2.63551	0.264608	8.17728e-07	1.27554e-05	4.89431	0.230257	1.90068e-05	0.000166733	3.77798	-0.254593	2.14291e-06	3.31926e-05	-4.47896	-0.254555	2.15063e-06	3.31962e-05	-4.47891	0.272916	3.57023e-07	5.06435e-06	5.29548	0.258133	1.53122e-06	1.75733e-05	4.75515	-0.0247061	0.649705	0.794763	-0.0997625	-0.0689936	0.204329	0.379053	-0.4213	0.08406	0.12182	0.377384	0.423216	0.0517454	0.341294	0.636607
246	GO_CALMODULIN_BINDING	111	0.220142	4.41385e-05	0.000227629	3.64277	0.269326	5.1242e-07	2.73497e-05	4.56305	0.319562	2.0318e-09	1.50015e-07	6.82387	0.31832	2.35905e-09	2.79075e-07	6.55428	-0.312094	4.93923e-09	3.25859e-07	-6.48697	-0.321518	1.60353e-09	1.14575e-07	-6.94091	0.335604	2.77333e-10	2.04764e-08	7.68875	0.328318	6.95167e-10	4.88824e-08	7.31085	0.0373974	0.491717	0.68264	0.165808	-0.00523707	0.923314	0.955746	-0.0196573	0.136657	0.0117062	0.134349	0.871766	0.109974	0.0427555	0.246877
247	GO_CALMODULIN_DEPENDENT_PROTEIN_KINASE_ACTIVITY	21	0.0888247	0.102021	0.170806	0.767497	0.121795	0.0247648	0.0615838	1.21053	0.225903	2.74421e-05	0.000218648	3.66025	0.258512	1.47665e-06	2.69199e-05	4.56993	-0.203214	0.000166394	0.00113825	-2.94376	-0.230662	1.83613e-05	0.000187853	-3.72618	0.216463	5.9412e-05	0.000323733	3.48981	0.210461	9.54693e-05	0.000496396	3.30417	-0.0425698	0.43378	0.638144	-0.195082	-0.0688641	0.205181	0.380131	-0.420067	0.0271251	0.618024	0.804066	0.0947081	0.0116557	0.830355	0.927736
248	GO_CAMERA_TYPE_EYE_MORPHOGENESIS	65	0.0818116	0.132147	0.210731	0.676272	0.118086	0.029531	0.0706004	1.15119	0.148941	0.00597158	0.0172677	1.76277	0.134874	0.0128552	0.0337774	1.47137	-0.185414	0.000601932	0.00309326	-2.50958	-0.187373	0.000525319	0.00265053	-2.57667	0.153021	0.0047231	0.0126887	1.89658	0.154188	0.00441238	0.0122731	1.91105	-0.0111358	0.837816	0.913718	-0.0391877	-0.0242698	0.655489	0.776856	-0.109659	0.0523499	0.335678	0.61193	0.213298	0.0327872	0.546655	0.784731
249	GO_CAMP_MEDIATED_SIGNALING	23	-0.0262373	0.629574	0.721977	-0.141477	-0.0589399	0.278327	0.399673	-0.398295	0.0820971	0.130799	0.209233	0.67937	0.0502188	0.355741	0.473111	0.325037	-0.115061	0.033982	0.071857	-1.14353	-0.13407	0.0134055	0.0340712	-1.46761	0.0110567	0.838952	0.876133	0.05743	0.00850516	0.875771	0.906252	0.042751	-0.142212	0.00868697	0.0722531	-1.14114	-0.158164	0.00348689	0.0765048	-1.11631	-0.0692394	0.202719	0.478701	-0.319935	-0.0807055	0.137469	0.417353
250	GO_CANONICAL_WNT_SIGNALING_PATHWAY	70	-0.00702164	0.897308	0.932678	-0.0302683	-0.0159405	0.769512	0.837577	-0.0769753	0.0748993	0.168145	0.25501	0.593443	0.0616581	0.256731	0.370976	0.430654	-0.114035	0.0356168	0.0747077	-1.12663	-0.119274	0.0279259	0.0606132	-1.21743	0.0359096	0.509117	0.6045	0.218604	0.0359536	0.508598	0.605019	0.218231	-0.116988	0.0310859	0.145293	-0.837755	-0.125919	0.0202585	0.134551	-0.871114	-0.0349827	0.520118	0.74384	-0.128521	-0.0532253	0.327651	0.625201
251	GO_CARBOHYDRATE_BINDING	130	-0.112984	0.0373599	0.0738529	-1.13163	-0.0517708	0.341057	0.46403	-0.333454	0.0102552	0.850483	0.895037	0.0481588	-0.0293902	0.588985	0.690814	-0.160639	-0.0593502	0.274991	0.373798	-0.427363	-0.0684324	0.208041	0.296627	-0.527789	-0.0355952	0.512836	0.607612	-0.216373	-0.0350944	0.518786	0.614826	-0.211247	-0.0919099	0.0906251	0.264125	-0.578191	-0.126535	0.01965	0.133882	-0.873277	-0.0155741	0.774665	0.893551	-0.0488806	-0.040341	0.458249	0.723219
252	GO_CARBOHYDRATE_BIOSYNTHETIC_PROCESS	90	-0.0628216	0.247851	0.354072	-0.450908	-0.14136	0.00909949	0.028052	-1.55204	-0.0428846	0.430385	0.531384	-0.274591	-0.0574985	0.290266	0.406537	-0.3909	0.0763471	0.160055	0.243741	0.613071	0.046073	0.396881	0.493317	0.306874	-0.114126	0.0354683	0.0684937	-1.16435	-0.11819	0.0293885	0.058901	-1.22988	-0.155834	0.00400513	0.0521845	-1.28246	-0.153408	0.004618	0.0804187	-1.09464	-0.09022	0.0967337	0.342248	-0.46566	-0.0906279	0.09523	0.356007
253	GO_CARBOHYDRATE_CATABOLIC_PROCESS	79	-0.091916	0.0906036	0.154971	-0.80975	-0.12347	0.0228393	0.057816	-1.23795	0.00618385	0.909505	0.937001	0.0282598	-0.0325017	0.550153	0.658164	-0.181666	0.0128699	0.812993	0.860587	0.065205	0.0231588	0.670311	0.740992	0.130187	-0.0700335	0.197579	0.283764	-0.547043	-0.0731346	0.178416	0.261629	-0.582314	-0.127136	0.019073	0.110298	-0.957431	-0.143598	0.00805123	0.0959302	-1.01804	-0.0934032	0.0854883	0.320064	-0.494763	-0.101273	0.0621634	0.296962
254	GO_CARBOHYDRATE_DERIVATIVE_BIOSYNTHETIC_PROCESS	440.5	0.106079	0.0506644	0.0953592	1.02064	0.0545272	0.316114	0.43913	0.357407	0.158674	0.00335017	0.0106954	1.9708	0.141618	0.00892599	0.02517	1.59912	-0.159786	0.00313212	0.011118	-1.95397	-0.173011	0.00136191	0.00564914	-2.24802	0.128863	0.0174404	0.0378078	1.42242	0.123061	0.0232436	0.048365	1.31547	-0.0876558	0.106647	0.28729	-0.541679	-0.104143	0.0550545	0.194027	-0.712138	0.0230029	0.672553	0.83651	0.0775287	0.00626895	0.908311	0.963674
255	GO_CARBOHYDRATE_DERIVATIVE_CATABOLIC_PROCESS	126	-0.168852	0.0018041	0.00562434	-2.24993	-0.112063	0.0389451	0.0878725	-1.05615	-0.0507428	0.35074	0.456055	-0.340983	-0.0855316	0.115409	0.199483	-0.700094	-0.0208225	0.701893	0.770031	-0.113492	-0.0126516	0.816108	0.86162	-0.0646842	-0.0973232	0.0731136	0.124622	-0.904404	-0.0973085	0.073157	0.12609	-0.899319	-0.104886	0.0533654	0.198438	-0.702374	-0.134006	0.01345	0.11729	-0.930739	-0.0337733	0.534653	0.755507	-0.121762	-0.0415305	0.445095	0.71106
256	GO_CARBOHYDRATE_DERIVATIVE_METABOLIC_PROCESS	767	0.0214624	0.694197	0.777178	0.109479	-0.0134525	0.80536	0.865336	-0.0628151	0.0717037	0.188488	0.279148	0.554166	0.0521355	0.339275	0.456974	0.340108	-0.0873778	0.108816	0.179279	-0.746472	-0.0987172	0.0698934	0.125153	-0.90256	0.0362782	0.506233	0.601883	0.220488	0.0318371	0.559693	0.651456	0.186115	-0.0739253	0.175124	0.385012	-0.414525	-0.0904872	0.0967469	0.255721	-0.592233	-0.000613577	0.991033	0.995753	-0.00184825	-0.00965423	0.859636	0.943192
257	GO_CARBOHYDRATE_DERIVATIVE_TRANSPORT	39	-0.182032	0.000758926	0.00266829	-2.57377	-0.196299	0.000277839	0.00200461	-2.69797	-0.0936875	0.0845376	0.146748	-0.833428	-0.0965904	0.0753087	0.14155	-0.849089	0.112179	0.0387423	0.0799386	1.09724	0.0832686	0.125381	0.200013	0.698941	-0.168434	0.00185257	0.00575923	-2.23964	-0.172509	0.00142727	0.00476473	-2.32196	-0.152676	0.00481881	0.055161	-1.25837	-0.161668	0.00282134	0.0746164	-1.12717	-0.131504	0.0153008	0.155997	-0.806882	-0.12989	0.0166106	0.170731
258	GO_CARBOHYDRATE_DERIVATIVE_TRANSPORTER_ACTIVITY	30	-0.178159	0.000984875	0.003351	-2.47483	-0.169224	0.00176202	0.00799771	-2.09703	-0.0613992	0.258737	0.359424	-0.444393	-0.0727486	0.180722	0.280912	-0.551429	0.0841854	0.121263	0.195384	0.70911	0.0657377	0.226543	0.31749	0.498271	-0.127858	0.0183985	0.0394891	-1.40352	-0.131879	0.0150104	0.0339782	-1.4688	-0.126638	0.0195506	0.111323	-0.953416	-0.132872	0.0142628	0.119441	-0.922847	-0.119956	0.0270374	0.203009	-0.692484	-0.119601	0.0274964	0.206107
259	GO_CARBOHYDRATE_HOMEOSTASIS	108	-0.200183	0.000208749	0.000861844	-3.06457	-0.11576	0.0329059	0.0769252	-1.11393	-0.0710706	0.191009	0.281681	-0.550242	-0.0957392	0.0779257	0.145169	-0.838127	0.0758009	0.163072	0.247637	0.606185	0.0502762	0.355191	0.453308	0.343607	-0.117552	0.0302788	0.0597483	-1.22367	-0.120641	0.0261706	0.0535747	-1.27104	-0.156193	0.00392097	0.0516961	-1.28654	-0.163748	0.00248311	0.0723695	-1.14044	-0.0955081	0.0786489	0.308175	-0.511202	-0.106785	0.049173	0.263724
260	GO_CARBOHYDRATE_METABOLIC_PROCESS	448	-0.0958492	0.0775757	0.136536	-0.864754	-0.067654	0.213385	0.327093	-0.485329	0.0430259	0.429059	0.530428	0.275374	0.0126769	0.81584	0.87131	0.0598273	-0.0461186	0.396603	0.496735	-0.303876	-0.0428766	0.430664	0.527324	-0.277922	-0.0128671	0.813127	0.853793	-0.0686476	-0.0175249	0.747469	0.80842	-0.0923629	-0.113294	0.0367906	0.161165	-0.792729	-0.124944	0.0211996	0.136702	-0.864225	-0.0617196	0.256398	0.542947	-0.265243	-0.0763284	0.160232	0.449543
261	GO_CARBOHYDRATE_PHOSPHORYLATION	17	-0.153471	0.0046011	0.0125279	-1.90212	-0.0976575	0.0721295	0.141075	-0.850551	-0.0019876	0.970859	0.97909	-0.00917742	-0.0239608	0.659598	0.749194	-0.125406	0.0425292	0.434218	0.531966	0.274116	0.0130388	0.810586	0.857629	0.0667003	-0.0521206	0.337801	0.438201	-0.358326	-0.0520675	0.338294	0.442306	-0.354277	-0.0973711	0.0729718	0.235273	-0.628428	-0.118528	0.0289248	0.150947	-0.821175	-0.125734	0.0204443	0.176891	-0.752295	-0.127837	0.0184179	0.180639
262	GO_CARBOHYDRATE_TRANSPORT	55	-0.213442	7.55561e-05	0.000361072	-3.44241	-0.137434	0.0112348	0.0329603	-1.48201	-0.0373922	0.491777	0.590079	-0.22909	-0.0976929	0.0720259	0.136825	-0.863836	0.0354712	0.514306	0.609028	0.215363	0.00440906	0.93541	0.955909	0.0195834	-0.128889	0.0174711	0.0378468	-1.42197	-0.129811	0.0166777	0.0369227	-1.43271	-0.131323	0.0154433	0.0984541	-1.00677	-0.175978	0.00113799	0.059846	-1.22296	-0.0710975	0.190841	0.464196	-0.333299	-0.0835708	0.124011	0.401943
263	GO_CARBOHYDRATE_TRANSPORTER_ACTIVITY	21	-0.284794	1.04136e-07	1.12518e-06	-5.94878	-0.158081	0.00350439	0.0134705	-1.87062	-0.0962625	0.0763083	0.135225	-0.868943	-0.18195	0.000763189	0.00330491	-2.48084	0.0513119	0.345358	0.444878	0.351759	0.0278127	0.609143	0.690508	0.160831	-0.173172	0.00136725	0.00448662	-2.34808	-0.173408	0.00134643	0.00454278	-2.34268	-0.107544	0.0475764	0.186742	-0.728758	-0.178051	0.000992011	0.0564122	-1.24863	-0.0398616	0.463611	0.709876	-0.148818	-0.0536677	0.323642	0.621202
264	GO_CARBON_CARBON_LYASE_ACTIVITY	38	-0.052691	0.332536	0.44519	-0.351455	-0.0155695	0.77473	0.842221	-0.0745737	0.0261734	0.630408	0.717919	0.143924	-0.00811802	0.881383	0.91634	-0.0379432	-0.0802341	0.139787	0.218974	-0.659608	-0.0665199	0.221055	0.311375	-0.506716	0.0223558	0.681104	0.747563	0.126352	0.0276057	0.611811	0.695311	0.157821	0.0112249	0.836535	0.913221	0.0394239	-0.0200055	0.713063	0.816879	-0.0878424	0.0093405	0.863683	0.940309	0.0267296	-0.000720238	0.98944	0.994152
265	GO_CARBON_OXYGEN_LYASE_ACTIVITY	57	0.156762	0.00379106	0.0105758	1.97569	0.0978712	0.0715062	0.140049	0.853718	0.0064968	0.904946	0.933825	0.0297345	0.0302564	0.578049	0.682172	0.166106	0.000650932	0.990456	0.992858	0.0031127	-0.0517643	0.341117	0.439671	-0.356872	0.0347644	0.522727	0.615873	0.210509	0.0410453	0.450434	0.552289	0.257833	0.135771	0.0122651	0.0870745	1.06011	0.124786	0.0214193	0.136942	0.863465	0.137815	0.0110099	0.128691	0.890453	0.147095	0.00662805	0.112287
266	GO_CARBOXY_LYASE_ACTIVITY	27	0.0565425	0.29837	0.409473	0.387775	0.0438506	0.420065	0.542137	0.265891	0.121035	0.0256827	0.0564356	1.24845	0.0957578	0.0778677	0.145122	0.838268	-0.149974	0.00563009	0.0175273	-1.75629	-0.131324	0.0154426	0.0382396	-1.41749	0.105912	0.0510649	0.0924029	1.03431	0.109263	0.044122	0.0831392	1.08019	0.0153662	0.777594	0.877641	0.056683	-0.00369187	0.945899	0.967841	-0.0141961	0.0276594	0.611118	0.800603	0.0965829	0.0156062	0.774214	0.901621
267	GO_CARBOXY_TERMINAL_DOMAIN_PROTEIN_KINASE_COMPLEX	21	0.0797196	0.142351	0.223701	0.650332	-0.0946898	0.081253	0.155675	-0.80778	-0.0433285	0.425625	0.527417	-0.277845	0.00889749	0.87009	0.907368	0.0422167	0.0545039	0.316151	0.415347	0.381589	0.151909	0.00503766	0.015694	1.80427	-0.0524449	0.334801	0.434947	-0.361564	-0.0535959	0.32429	0.426926	-0.369648	-0.0208478	0.701547	0.828732	-0.0815858	0.0294052	0.588796	0.722987	0.14087	-0.106282	0.0502558	0.257032	-0.590013	-0.0895645	0.0991897	0.36255
268	GO_CARBOXYLIC_ESTER_HYDROLASE_ACTIVITY	73	-0.160262	0.00307312	0.0088116	-2.05495	-0.0937958	0.0841774	0.159771	-0.796502	0.0403043	0.458658	0.557436	0.253805	0.00599883	0.912201	0.937883	0.0278515	-0.0306313	0.573345	0.661437	-0.179511	-0.0262614	0.629259	0.708416	-0.149712	-0.0452804	0.40506	0.505469	-0.296305	-0.0485503	0.371965	0.476448	-0.321985	-0.101104	0.0626005	0.218019	-0.661505	-0.128595	0.0177317	0.131137	-0.882273	-0.0979042	0.0714104	0.29613	-0.528517	-0.12381	0.0224642	0.192429
269	GO_CARBOXYPEPTIDASE_ACTIVITY	20	-0.0569929	0.294534	0.40471	-0.392857	-0.0908563	0.0943963	0.174312	-0.758672	-0.0342179	0.529287	0.624099	-0.204746	-0.0199185	0.714257	0.792624	-0.100933	-0.000964796	0.985853	0.990976	-0.00393679	0.0352331	0.517135	0.608475	0.215757	-0.0627563	0.248343	0.340896	-0.467378	-0.0670603	0.21732	0.307483	-0.512179	-0.0554388	0.307913	0.52504	-0.279808	-0.0475791	0.381616	0.547833	-0.261352	-0.0557682	0.305044	0.584997	-0.232846	-0.0624125	0.250948	0.549259
270	GO_CARDIAC_ATRIUM_DEVELOPMENT	20	-0.116901	0.0312125	0.0638076	-1.19513	0.0594983	0.273793	0.395469	0.402888	-0.0244597	0.652969	0.736348	-0.132917	-0.0541208	0.319569	0.436942	-0.359576	-0.0675201	0.214178	0.307655	-0.511936	-0.102883	0.0581052	0.10861	-0.96413	-0.00871339	0.872755	0.902499	-0.0445534	0.00307208	0.954971	0.967419	0.0143855	0.0661975	0.223306	0.442021	0.354557	0.000758403	0.98888	0.994266	0.0024972	0.113226	0.0369516	0.228625	0.640876	0.091499	0.0920814	0.349775
271	GO_CARDIAC_CELL_DEVELOPMENT	27	0.224432	3.10176e-05	0.000168392	3.77368	0.192288	0.000371198	0.00248025	2.6055	0.197173	0.000260646	0.00129013	2.88937	0.1524	0.00489664	0.015397	1.81256	-0.225442	2.85172e-05	0.000289087	-3.53897	-0.223231	3.42589e-05	0.00031179	-3.50614	0.2151	6.62458e-05	0.000350193	3.45569	0.220508	4.28409e-05	0.000255431	3.59273	0.0239627	0.659573	0.800728	0.0965148	-0.00391017	0.942705	0.966241	-0.0149147	0.115223	0.0337307	0.224028	0.649697	0.100743	0.0635476	0.29847
272	GO_CARDIAC_CHAMBER_DEVELOPMENT	101	-0.0193829	0.721616	0.801403	-0.0961491	0.0153048	0.778459	0.845032	0.073127	-0.0175242	0.747356	0.814262	-0.089236	-0.0482526	0.374907	0.492712	-0.307407	-0.0678676	0.211825	0.305067	-0.515604	-0.0860427	0.113245	0.184261	-0.734566	-0.0175147	0.747488	0.804903	-0.0942563	-0.0101844	0.851504	0.888251	-0.0514641	-0.0231759	0.670082	0.809286	-0.0918977	-0.0396671	0.465796	0.625125	-0.204033	0.0589609	0.278155	0.560359	0.251534	0.0428797	0.430438	0.701944
273	GO_CARDIAC_CHAMBER_MORPHOGENESIS	66	-0.062073	0.253539	0.360455	-0.443148	-0.012847	0.813319	0.871765	-0.0596005	-0.0704124	0.19516	0.286562	-0.542781	-0.0812978	0.134599	0.22467	-0.648455	-0.00721185	0.894542	0.924165	-0.0342504	-0.0303211	0.577236	0.662022	-0.179127	-0.0577152	0.288449	0.385236	-0.414273	-0.0484498	0.372956	0.476941	-0.321535	-0.00954751	0.860692	0.928157	-0.0323787	-0.00699019	0.897765	0.940658	-0.0265685	0.0384187	0.479959	0.716381	0.144856	0.0280267	0.606391	0.819128
274	GO_CARDIAC_CONDUCTION	35	-0.0981521	0.0706935	0.126228	-0.898843	0.0664436	0.221587	0.335944	0.473733	0.0374753	0.490815	0.589084	0.229823	0.00331939	0.951351	0.966181	0.0149414	-0.0769296	0.156884	0.240233	-0.619367	-0.12245	0.0239956	0.0538231	-1.26903	0.038245	0.481948	0.579856	0.23668	0.0420367	0.439563	0.542715	0.265428	-0.00298232	0.956286	0.979141	-0.00915491	-0.0414575	0.445896	0.607872	-0.216188	0.0760149	0.161885	0.43411	0.362401	0.0526452	0.332956	0.628996
275	GO_CARDIAC_EPITHELIAL_TO_MESENCHYMAL_TRANSITION	16	-0.0585698	0.28136	0.390484	-0.408397	-0.0617946	0.255678	0.374927	-0.426053	-0.0531468	0.328365	0.43345	-0.363061	-0.0770521	0.156223	0.251753	-0.599025	0.0152407	0.779363	0.833956	0.0788567	-0.0131194	0.809437	0.856823	-0.0671087	-0.070961	0.191696	0.276887	-0.557697	-0.0658097	0.226033	0.31768	-0.49801	-0.0858467	0.114071	0.298133	-0.52559	-0.0723102	0.18337	0.357515	-0.446706	-0.0295142	0.587414	0.788559	-0.103166	-0.0365737	0.501311	0.752561
276	GO_CARDIAC_MUSCLE_CELL_ACTION_POTENTIAL	17	0.0852742	0.116511	0.190529	0.72004	0.179055	0.000927706	0.00492184	2.30787	0.322836	1.36597e-09	1.18652e-07	6.92572	0.265384	7.57695e-07	1.61374e-05	4.79217	-0.258849	1.42966e-06	2.3988e-05	-4.62001	-0.281154	1.52819e-07	4.2049e-06	-5.37624	0.294018	3.84702e-08	8.6213e-07	6.06443	0.277182	2.30832e-07	3.96352e-06	5.40192	-0.09451	0.0818346	0.249846	-0.602327	-0.11654	0.0317392	0.156057	-0.806716	0.0340258	0.531602	0.754049	0.122601	0.0062266	0.908882	0.963674
277	GO_CARDIAC_MUSCLE_CELL_DIFFERENTIATION	46	0.0292309	0.591008	0.68998	0.161164	0.0232265	0.669403	0.759594	0.119418	0.0580853	0.285365	0.3879	0.41128	0.0291533	0.591993	0.693974	0.158657	-0.0912877	0.0928373	0.15916	-0.798166	-0.110479	0.0418057	0.0842964	-1.07419	0.0391057	0.472137	0.571012	0.243355	0.0411678	0.449083	0.551244	0.258656	-0.0454648	0.403148	0.612674	-0.21277	-0.0660009	0.224686	0.400335	-0.397576	0.0235254	0.665405	0.832696	0.0795137	0.0156547	0.773531	0.901062
278	GO_CARDIAC_MUSCLE_TISSUE_DEVELOPMENT	88	-0.00724238	0.894098	0.930215	-0.0314168	-0.00710193	0.89614	0.93152	-0.030808	-0.0211031	0.698071	0.774699	-0.110867	-0.0389051	0.474414	0.588533	-0.230229	-0.0308445	0.57068	0.659049	-0.181083	-0.0483222	0.374218	0.472034	-0.326026	-0.0331832	0.54182	0.63298	-0.19861	-0.0244689	0.652847	0.730886	-0.136151	-0.0323207	0.552378	0.724396	-0.140024	-0.031786	0.558973	0.701885	-0.153734	0.0104622	0.847502	0.933499	0.0298863	0.0079791	0.883398	0.954967
279	GO_CARDIAC_MUSCLE_TISSUE_MORPHOGENESIS	28	-0.0873387	0.107901	0.178759	-0.747732	-0.0240692	0.658155	0.751648	-0.123985	-0.0265642	0.625309	0.714603	-0.145935	-0.0657566	0.226409	0.336913	-0.472482	-0.00749029	0.890495	0.921059	-0.0357128	-0.0356294	0.512431	0.604063	-0.218918	-0.0503107	0.354861	0.457119	-0.33997	-0.0390025	0.473308	0.574302	-0.24086	-0.0442725	0.415604	0.623265	-0.205327	-0.0463621	0.393922	0.558961	-0.252618	-0.00531737	0.922142	0.96483	-0.0155494	-0.00598265	0.912437	0.964241
280	GO_CARDIAC_SEPTUM_DEVELOPMENT	66	-0.0517872	0.340903	0.453514	-0.343409	-0.0175483	0.74702	0.821778	-0.0852455	-0.0347058	0.523429	0.619004	-0.208307	-0.0690137	0.204197	0.309792	-0.50893	-0.0712062	0.190163	0.280526	-0.552026	-0.078742	0.147321	0.226609	-0.644724	-0.0411562	0.449211	0.548211	-0.261053	-0.0326589	0.548225	0.641478	-0.192818	-0.0420272	0.439666	0.642558	-0.192088	-0.0757377	0.163424	0.334794	-0.475222	0.0279986	0.606752	0.799213	0.0973373	0.0118978	0.826886	0.926196
281	GO_CARDIAC_SEPTUM_MORPHOGENESIS	36	-0.0871497	0.108668	0.179827	-0.745145	-0.0577342	0.28829	0.410388	-0.386806	-0.111769	0.0394644	0.0792508	-1.101	-0.127658	0.0185829	0.0453317	-1.3436	0.0147424	0.7864	0.838649	0.0764195	-0.00469239	0.931269	0.95262	-0.0210802	-0.102685	0.0585917	0.103576	-0.984741	-0.0915185	0.0920117	0.153122	-0.814961	-0.0228721	0.674157	0.811457	-0.0907343	-0.0432671	0.426281	0.589396	-0.229593	0.00895917	0.869197	0.941544	0.0261592	0.00336671	0.950658	0.977126
282	GO_CARDIAC_VENTRICLE_DEVELOPMENT	70	-0.0441486	0.416911	0.528143	-0.277248	-0.0286844	0.597967	0.70172	-0.153836	-0.00512319	0.924977	0.94831	-0.0230498	-0.0419274	0.440754	0.557232	-0.253964	-0.0229493	0.67312	0.746787	-0.126803	-0.0406142	0.455208	0.552334	-0.257798	-0.0273993	0.614476	0.693866	-0.158725	-0.0249345	0.646686	0.72527	-0.1395	-0.0645186	0.235287	0.454765	-0.342213	-0.0592775	0.275579	0.446179	-0.350491	0.002045	0.970017	0.985365	0.00640279	-0.00806551	0.882145	0.954967
283	GO_CARDIAC_VENTRICLE_MORPHOGENESIS	33	-0.119901	0.0271088	0.0567542	-1.246	-0.07172	0.186978	0.295615	-0.529273	-0.00411595	0.939695	0.957638	-0.0187988	-0.0220557	0.685155	0.768205	-0.114523	-0.00971818	0.858228	0.894998	-0.048178	-0.00826763	0.879214	0.912158	-0.0399298	-0.0460024	0.397605	0.497427	-0.303271	-0.0435159	0.423624	0.526558	-0.278554	-0.0994179	0.0671246	0.225893	-0.646098	-0.0839583	0.122273	0.28751	-0.541347	-0.0378365	0.486643	0.721013	-0.142057	-0.048771	0.369793	0.66208
284	GO_CARDIOCYTE_DIFFERENTIATION	62	-0.0790363	0.145811	0.228168	-0.641746	-0.0120459	0.824766	0.879043	-0.0559897	-0.00937562	0.863176	0.903988	-0.0438375	-0.0415088	0.445333	0.561793	-0.250424	-0.0264152	0.627251	0.707594	-0.150216	-0.0371352	0.494761	0.588558	-0.230211	-0.0227145	0.676274	0.744864	-0.127923	-0.0199783	0.713436	0.779798	-0.108018	-0.0627581	0.24833	0.468526	-0.329266	-0.0558464	0.304366	0.473434	-0.324741	-0.00698591	0.897827	0.953119	-0.0208528	-0.0198543	0.715136	0.880504
285	GO_CARGO_RECEPTOR_ACTIVITY	27	-0.108052	0.0465329	0.0889687	-1.05076	0.0476203	0.381203	0.503647	0.297873	-0.0133075	0.806759	0.862005	-0.0644902	0.00302659	0.955637	0.969198	0.0135874	-0.0346383	0.524237	0.617936	-0.209056	-0.0858219	0.114176	0.185138	-0.732504	0.00836166	0.87785	0.906842	0.0424683	0.011685	0.829935	0.871029	0.0599675	-0.00943454	0.862324	0.928863	-0.0320483	-0.0284297	0.601222	0.731507	-0.135782	0.0463691	0.393851	0.65855	0.181412	0.025332	0.641444	0.836748
286	GO_CARTILAGE_DEVELOPMENT	95	-0.0869211	0.109601	0.181034	-0.742241	0.0358306	0.510051	0.626949	0.202768	-0.000316612	0.995359	0.996484	-0.00152986	-0.0237468	0.66245	0.751199	-0.124245	-0.0640685	0.238574	0.334775	-0.475247	-0.0792036	0.144958	0.223828	-0.650085	0.00960094	0.859921	0.892352	0.049464	0.00979726	0.857087	0.891372	0.0499408	-0.0140943	0.795579	0.887538	-0.051813	-0.0137703	0.800177	0.877204	-0.0568992	0.0592009	0.276201	0.55926	0.252386	0.0396235	0.466288	0.728815
287	GO_CATALYTIC_COMPLEX	896	0.158196	0.00369675	0.0103331	1.98577	0.129302	0.0178983	0.0474503	1.32376	0.103875	0.0575308	0.107491	0.968628	0.157627	0.00382358	0.0126312	1.89855	-0.0484712	0.376495	0.478037	-0.320538	-0.0429431	0.433385	0.529919	-0.27579	0.13947	0.010598	0.0248384	1.60488	0.137649	0.0116696	0.0274991	1.56068	0.0588427	0.282866	0.50162	0.299625	0.0835355	0.127034	0.292952	0.533204	0.0393257	0.473149	0.713184	0.146798	0.0286017	0.601916	0.817847
288	GO_CATALYTIC_STEP_2_SPLICEOSOME	86	0.200596	0.000196791	0.000820889	3.08572	0.0225191	0.679053	0.7674	0.114978	-0.0488069	0.369626	0.474621	-0.323653	-0.00218393	0.967996	0.977484	-0.00989019	0.105879	0.0511025	0.0997562	1.00106	0.116323	0.0320111	0.0678838	1.16823	-0.0145622	0.789055	0.836047	-0.0777693	-0.0178274	0.743262	0.805442	-0.0939655	0.0611414	0.260889	0.481414	0.317481	0.111396	0.040086	0.169042	0.772005	0.024874	0.647645	0.822355	0.0849408	0.0379661	0.485343	0.737905
289	GO_CATION_CHANNEL_ACTIVITY	104	-0.00200226	0.970644	0.980814	-0.00841342	0.101595	0.0613334	0.124865	0.903558	0.125752	0.0204255	0.0469077	1.32876	0.0915991	0.0917248	0.166193	0.779388	-0.189806	0.000442827	0.00241295	-2.61745	-0.21091	9.21859e-05	0.000678378	-3.16853	0.117461	0.0304086	0.059937	1.22231	0.119291	0.0279033	0.0563803	1.24887	0.00798124	0.883367	0.941607	0.0261305	-0.0365297	0.501826	0.65439	-0.184163	0.0834533	0.124542	0.380499	0.419647	0.0586382	0.280798	0.582975
290	GO_CATION_CHANNEL_COMPLEX	64	0.06033	0.267134	0.376137	0.424654	0.17175	0.00149898	0.007039	2.15249	0.175107	0.00120507	0.00461805	2.33554	0.142392	0.00860205	0.0245219	1.61045	-0.230119	1.92309e-05	0.000206278	-3.68555	-0.252096	2.7086e-06	3.97321e-05	-4.40086	0.188671	0.000479698	0.00184627	2.7337	0.193032	0.00035192	0.00147773	2.83041	0.0342631	0.528743	0.707439	0.150311	-0.0138097	0.799617	0.876827	-0.057086	0.107798	0.0470525	0.252047	0.598519	0.0772917	0.154937	0.442819
291	GO_CATION_TRANSMEMBRANE_TRANSPORTER_ACTIVITY	299	-0.0843335	0.120608	0.195855	-0.708066	-0.0178173	0.743278	0.81889	-0.0867746	0.0776734	0.152904	0.236345	0.626453	0.0315803	0.561521	0.667617	0.175473	-0.134873	0.0128563	0.0339779	-1.4688	-0.156045	0.00395555	0.0130186	-1.88543	0.0129524	0.811817	0.853024	0.0690386	0.0181989	0.737978	0.801089	0.0963194	-0.0780779	0.150772	0.353584	-0.451507	-0.124259	0.0219786	0.1385	-0.858551	0.0028837	0.95773	0.978718	0.00934234	-0.0176921	0.745019	0.892009
292	GO_CATION_TRANSPORT	409	-0.106225	0.0503806	0.0948921	-1.02277	-0.0636545	0.241627	0.358715	-0.44525	0.00869568	0.873011	0.910458	0.0407399	-0.0209223	0.700532	0.780719	-0.107505	-0.0629584	0.246821	0.34395	-0.463505	-0.0878114	0.106002	0.174666	-0.757792	-0.0522953	0.336183	0.436486	-0.36003	-0.0444221	0.414028	0.516806	-0.286672	-0.0843866	0.120373	0.307883	-0.511614	-0.114341	0.0351223	0.16157	-0.79164	-0.0166858	0.759061	0.885129	-0.0529933	-0.0306317	0.573341	0.802497
293	GO_CATION_TRANSPORTING_ATPASE_ACTIVITY	39	-0.169929	0.00168458	0.00530022	-2.27571	-0.169028	0.00178411	0.00805668	-2.09384	-0.123797	0.0224786	0.0505997	-1.29585	-0.116675	0.0315419	0.0697956	-1.15617	0.0989816	0.0683377	0.125408	0.901673	0.0971717	0.0735629	0.130354	0.884877	-0.174153	0.00128266	0.0042627	-2.37032	-0.166315	0.00211689	0.00659946	-2.18049	-0.104214	0.054919	0.202069	-0.6945	-0.0722989	0.183438	0.357515	-0.446706	-0.126135	0.0200428	0.175426	-0.755906	-0.124849	0.0213528	0.186766
294	GO_CD4_POSITIVE_ALPHA_BETA_T_CELL_ACTIVATION	18	-0.220456	4.30216e-05	0.000222387	-3.65289	-0.137974	0.0109167	0.0322617	-1.49131	-0.0581412	0.284901	0.387388	-0.411854	-0.0774529	0.154076	0.249381	-0.603137	0.0486584	0.370901	0.472696	0.325419	0.0428797	0.430438	0.527324	0.277922	-0.111191	0.0404995	0.0762486	-1.11777	-0.118845	0.0284965	0.0574077	-1.24103	-0.179977	0.000872038	0.0279937	-1.55294	-0.153893	0.00448924	0.0804187	-1.09464	-0.131028	0.0156775	0.157642	-0.802328	-0.14778	0.00637743	0.109504
295	GO_CELL_ACTIVATION	322	-0.092843	0.0873873	0.15034	-0.822925	-0.0869327	0.109553	0.195852	-0.708071	0.0265517	0.625472	0.714603	0.145935	0.029458	0.588126	0.690172	0.161043	0.0232195	0.669497	0.744072	0.128385	0.00177785	0.973933	0.982807	0.00753167	-0.0280942	0.605524	0.686405	-0.163419	-0.0378725	0.486228	0.584371	-0.233311	-0.160832	0.00296873	0.0459483	-1.33773	-0.126684	0.0195053	0.133882	-0.873277	-0.122849	0.0235377	0.189544	-0.722289	-0.135149	0.0126717	0.150903
296	GO_CELL_ACTIVATION_INVOLVED_IN_IMMUNE_RESPONSE	71	-0.0598268	0.271149	0.379928	-0.420299	-0.0373617	0.492131	0.611883	-0.213332	-0.0444374	0.413868	0.516454	-0.286968	-0.0134006	0.805433	0.864567	-0.0632011	0.0834026	0.124772	0.199906	0.699174	0.0349103	0.520982	0.612676	0.212769	-0.0466207	0.391287	0.49091	-0.308998	-0.0505739	0.352347	0.456136	-0.340906	-0.066562	0.220763	0.439139	-0.357398	-0.023803	0.661701	0.780331	-0.107721	-0.0638689	0.240043	0.522294	-0.282085	-0.0655011	0.228222	0.524023
297	GO_CELL_ADHESION_MOLECULE_BINDING	117	-0.0632216	0.244848	0.350574	-0.45522	-0.046007	0.397558	0.519774	-0.284185	0.0719719	0.185432	0.275751	0.559482	0.0445012	0.413197	0.531339	0.274628	-0.0620727	0.253542	0.351546	-0.454018	-0.0928625	0.0873205	0.149818	-0.824436	0.0156404	0.773733	0.824347	0.0838899	0.00738191	0.89207	0.917759	0.0372713	-0.13709	0.0114417	0.0841972	-1.0747	-0.129781	0.0167027	0.127332	-0.895062	-0.057867	0.287181	0.565056	-0.247909	-0.0810441	0.135823	0.414963
298	GO_CELL_AGING	60	0.093344	0.0856875	0.148222	0.829088	0.0975295	0.0725048	0.141496	0.849255	0.138914	0.0103826	0.0267569	1.57256	0.15102	0.00530245	0.0164265	1.78446	-0.0857407	0.11452	0.186996	-0.728167	-0.108045	0.0465484	0.0916486	-1.03787	0.140788	0.00938642	0.022501	1.6478	0.133694	0.0136691	0.0313265	1.50409	-0.0317412	0.559528	0.727716	-0.138038	-0.00215736	0.968371	0.981345	-0.00817818	-0.00961804	0.859674	0.938712	-0.0274675	-0.0278481	0.608688	0.819128
299	GO_CELL_BODY	304	-0.00300155	0.956004	0.97322	-0.0117892	-0.0318697	0.557938	0.666465	-0.176223	0.0804017	0.13896	0.218916	0.659723	0.0396873	0.46557	0.580148	0.236461	-0.0964536	0.0757244	0.13543	-0.868287	-0.126065	0.0201125	0.0466727	-1.33094	0.0150569	0.781957	0.83111	0.0803413	0.0157741	0.771851	0.827317	0.0823281	-0.121511	0.0251046	0.129619	-0.88733	-0.142	0.00878814	0.099185	-1.00355	-0.0271605	0.617565	0.804061	-0.0947112	-0.0448865	0.409161	0.69351
300	GO_CELL_CELL_ADHERENS_JUNCTION	35	0.0241129	0.657575	0.745062	0.127808	0.0167029	0.758822	0.830658	0.0805776	0.0904441	0.0959052	0.16179	0.791049	0.0816681	0.132828	0.222297	0.653067	-0.0603156	0.267248	0.365443	-0.43718	-0.10537	0.05227	0.099981	-1.00008	0.0566686	0.297292	0.394195	0.404289	0.0537825	0.322607	0.425089	0.37152	-0.0975637	0.0724043	0.234467	-0.629918	-0.0981267	0.0707665	0.216952	-0.663636	-0.0193771	0.721696	0.863851	-0.0635611	-0.0279446	0.607446	0.819128
301	GO_CELL_CELL_ADHESION	303	-0.00453942	0.933504	0.960387	-0.0175539	0.0592913	0.275468	0.397138	0.401059	0.137286	0.0113231	0.0286965	1.54217	0.109011	0.0446148	0.0927033	1.0329	-0.11725	0.030708	0.066327	-1.17831	-0.132496	0.0145417	0.0364508	-1.43829	0.112222	0.0386677	0.0735816	1.13323	0.102463	0.059143	0.105265	0.977718	-0.0781164	0.15057	0.353486	-0.451628	-0.0688028	0.205586	0.380269	-0.419909	0.0189775	0.727205	0.867655	0.0616528	-0.00651756	0.904644	0.963359
302	GO_CELL_CELL_ADHESION_VIA_PLASMA_MEMBRANE_ADHESION_MOLECULES	77	0.0379464	0.485378	0.595135	0.225385	0.104572	0.0540868	0.112637	0.948317	0.170495	0.00162476	0.00591428	2.2281	0.141726	0.00892027	0.0251699	1.59912	-0.175994	0.00113683	0.00508762	-2.29349	-0.159934	0.00313482	0.0108118	-1.9661	0.160017	0.003119	0.00889137	2.05103	0.151419	0.00518233	0.0139476	1.8555	-0.0290327	0.593527	0.755177	-0.121951	-0.0371083	0.495073	0.649829	-0.187201	0.064837	0.23298	0.515982	0.287365	0.0398741	0.46347	0.726842
303	GO_CELL_CELL_CONTACT_ZONE	46	0.074695	0.169311	0.258994	0.58671	0.163312	0.00255077	0.0106202	1.97387	0.232064	1.62862e-05	0.000144585	3.83988	0.190759	0.000413913	0.00196111	2.7075	-0.190776	0.000413438	0.00229515	-2.63919	-0.23826	9.50214e-06	0.000109053	-3.96236	0.221782	3.85984e-05	0.000225284	3.64727	0.21472	6.82763e-05	0.000379028	3.42133	-0.0550001	0.311761	0.527541	-0.277744	-0.0897529	0.0984789	0.258473	-0.587585	0.0630845	0.245874	0.53081	0.275061	0.0283903	0.601727	0.817847
304	GO_CELL_CELL_JUNCTION	237	0.0719857	0.185348	0.279093	0.554252	0.121538	0.0250716	0.062118	1.20678	0.210266	9.69339e-05	0.000575645	3.23985	0.179966	0.000872701	0.00368899	2.43309	-0.219307	4.72365e-05	0.0004245	-3.37212	-0.247419	4.1736e-06	5.65509e-05	-4.24756	0.18903	0.000467738	0.00180769	2.74288	0.182693	0.000725565	0.00271576	2.56611	-0.0823578	0.129578	0.322238	-0.491823	-0.0987548	0.0689754	0.215336	-0.666884	0.0522782	0.336341	0.612409	0.212959	0.0247501	0.649123	0.840332
305	GO_CELL_CELL_JUNCTION_ASSEMBLY	51	0.0971262	0.0736983	0.130714	0.883677	0.195201	0.000300942	0.00212627	2.67238	0.265938	7.17408e-07	1.15368e-05	4.93792	0.218139	5.19188e-05	0.000359341	3.44449	-0.278194	2.07925e-07	5.23358e-06	-5.2812	-0.30455	1.18279e-08	5.4581e-07	-6.26296	0.257666	1.60106e-06	1.66656e-05	4.77818	0.249719	3.37766e-06	3.21096e-05	4.49337	-0.0516505	0.342181	0.556159	-0.254801	-0.0945088	0.0818385	0.23302	-0.632606	0.103129	0.0575048	0.273921	0.562375	0.0611723	0.260503	0.559669
306	GO_CELL_CELL_RECOGNITION	24	0.0420052	0.439905	0.550397	0.259324	-0.0584575	0.282285	0.403916	-0.393709	0.00802765	0.882694	0.917324	0.0374774	0.014061	0.796051	0.857196	0.0669198	0.0265117	0.625993	0.706355	0.150977	0.0645964	0.234721	0.327089	0.485334	-0.0111742	0.837263	0.874576	-0.0582025	-0.0123085	0.82101	0.864735	-0.0631168	-0.0456834	0.400889	0.610707	-0.214167	-0.0102314	0.850826	0.909108	-0.0413847	-0.102149	0.0599277	0.278865	-0.554605	-0.0963922	0.0759114	0.326493
307	GO_CELL_CELL_SIGNALING	317	-0.0964634	0.0756946	0.133597	-0.874203	0.0277275	0.610241	0.711412	0.147879	0.123483	0.0228254	0.0512242	1.29053	0.0827471	0.127771	0.215958	0.665632	-0.129154	0.01724	0.0425715	-1.37088	-0.146486	0.00685845	0.020068	-1.6975	0.0708362	0.19248	0.277839	0.556207	0.0657273	0.226616	0.318297	0.497167	-0.110154	0.042415	0.174806	-0.757444	-0.116246	0.0321757	0.156845	-0.804529	-0.0198952	0.714575	0.86091	-0.0650422	-0.051684	0.341867	0.636607
308	GO_CELL_CHEMOTAXIS	72	-0.151373	0.00519593	0.0138997	-1.85699	-0.0505391	0.352679	0.475896	-0.322488	-0.0440713	0.417728	0.520105	-0.283909	-0.0304833	0.575201	0.679631	-0.167727	0.117669	0.0301138	0.0652661	1.18531	0.0723432	0.18317	0.268867	0.570462	-0.0600878	0.269061	0.364619	-0.438161	-0.071684	0.1872	0.272347	-0.564877	-0.0998881	0.0658372	0.223696	-0.650342	-0.0327585	0.547006	0.692947	-0.1593	-0.0883942	0.103698	0.354944	-0.449841	-0.0938884	0.0838709	0.334565
309	GO_CELL_COMMUNICATION_INVOLVED_IN_CARDIAC_CONDUCTION	16	0.00675876	0.901132	0.935337	0.0290321	0.050184	0.356075	0.479748	0.318987	0.133657	0.0136953	0.0334271	1.4759	0.101007	0.0628548	0.122448	0.912049	-0.109733	0.0432149	0.0872174	-1.0594	-0.140317	0.00962824	0.0261836	-1.58197	0.106143	0.0505596	0.091682	1.03772	0.102103	0.0600414	0.106607	0.972216	-0.104947	0.0532262	0.198188	-0.702923	-0.132019	0.0149027	0.122516	-0.911806	-0.00261624	0.961647	0.980768	-0.00843388	-0.0300882	0.580166	0.806609
310	GO_CELL_CORTEX	171	0.18417	0.00064332	0.00232645	2.63331	0.135264	0.0125444	0.0357735	1.44644	0.178779	0.000929308	0.0037324	2.42801	0.150089	0.00555342	0.0170845	1.7674	-0.161345	0.00284809	0.0102996	-1.98718	-0.176302	0.00109667	0.00473052	-2.32509	0.168624	0.00180735	0.00565037	2.24792	0.161762	0.00277619	0.00828402	2.08176	-0.00495481	0.927472	0.964937	-0.0155013	-0.0329061	0.545386	0.691885	-0.159966	0.0937405	0.0843607	0.318274	0.497199	0.0773348	0.154776	0.442644
311	GO_CELL_CORTEX_PART	84	0.202044	0.000176453	0.000745174	3.12774	0.119897	0.0270611	0.0657602	1.18204	0.161266	0.00286195	0.00941235	2.0263	0.145374	0.00725376	0.0213516	1.67057	-0.154892	0.00419857	0.0139115	-1.85663	-0.171375	0.0015147	0.00611951	-2.21328	0.146957	0.00663703	0.016802	1.77464	0.144297	0.00770182	0.0193748	1.71276	-0.0148905	0.784414	0.881074	-0.0549876	-0.0468155	0.389498	0.554103	-0.25641	0.0840496	0.121905	0.377384	0.423216	0.0737406	0.174924	0.468334
312	GO_CELL_CYCLE_ARREST	129	0.0424434	0.43534	0.545252	0.263403	0.00202912	0.970264	0.980668	0.00847793	0.0414792	0.445851	0.545312	0.263355	0.0564799	0.299069	0.41565	0.381272	-0.0465111	0.392592	0.492824	-0.307308	-0.0505092	0.353145	0.451708	-0.345143	0.0177532	0.744294	0.802607	0.0954971	0.015783	0.771839	0.827317	0.0823281	-0.0731059	0.178676	0.389489	-0.409505	-0.0609434	0.26244	0.433089	-0.363423	-0.0392867	0.470281	0.712345	-0.147309	-0.0502182	0.355928	0.649676
313	GO_CELL_CYCLE_CHECKPOINT	173	0.288202	6.30891e-08	7.33556e-07	6.13457	0.163084	0.00255903	0.0106247	1.97368	0.167188	0.0019798	0.00695521	2.15769	0.200747	0.000194569	0.00106281	2.97354	-0.0728956	0.179933	0.268113	-0.571681	-0.0849515	0.117938	0.190057	-0.721117	0.194765	0.000303006	0.00124185	2.90593	0.189857	0.000431589	0.0017573	2.75515	0.0413347	0.447438	0.648058	0.188386	0.0779291	0.151621	0.322826	0.491032	0.0393424	0.469651	0.712246	0.14737	0.0419225	0.441	0.709122
314	GO_CELL_CYCLE_G1_S_PHASE_TRANSITION	102	0.337351	2.2167e-10	5.15489e-09	8.28778	0.174934	0.0012188	0.00608028	2.21608	0.172427	0.00143487	0.00535057	2.2716	0.202316	0.000178023	0.000983344	3.00729	-0.084169	0.121336	0.195384	-0.70911	-0.116591	0.0316651	0.0672258	-1.17246	0.20393	0.000157635	0.000717703	3.14406	0.202847	0.000171056	0.000806149	3.09358	0.0495175	0.362505	0.572921	0.241905	0.0841271	0.121521	0.287099	0.541968	0.0547134	0.314293	0.593216	0.226787	0.0647357	0.233713	0.530478
315	GO_CELL_CYCLE_G2_M_PHASE_TRANSITION	130	0.335809	2.08845e-10	4.89515e-09	8.31023	0.237322	9.72313e-06	0.000177257	3.7514	0.245323	4.71674e-06	5.23688e-05	4.28093	0.253428	2.20938e-06	3.58568e-05	4.44543	-0.155539	0.00404096	0.0135003	-1.86966	-0.159454	0.00319578	0.0109747	-1.95961	0.276908	2.11496e-07	3.34616e-06	5.47545	0.271189	3.82385e-07	5.98757e-06	5.22275	0.058764	0.27992	0.498211	0.302586	0.0816714	0.132862	0.299929	0.522982	0.0804922	0.138569	0.39974	0.398222	0.0820085	0.131264	0.409041
316	GO_CELL_CYCLE_PHASE_TRANSITION	237	0.349021	3.56075e-11	1.01116e-09	8.99518	0.211364	8.58458e-05	0.00081472	3.08899	0.222773	3.40094e-05	0.000257541	3.58915	0.241875	6.46215e-06	7.73041e-05	4.1118	-0.131459	0.0152835	0.0388112	-1.41104	-0.151428	0.00514099	0.0159598	-1.79697	0.250952	2.79304e-06	2.5303e-05	4.59683	0.246791	4.11936e-06	3.77041e-05	4.42361	0.045711	0.400794	0.610707	0.214167	0.0745342	0.170316	0.342505	0.465334	0.0626869	0.249006	0.535018	0.271632	0.0665433	0.221014	0.515704
317	GO_CELL_CYCLE_PROCESS	937	0.319966	2.1812e-09	3.91008e-08	7.40781	0.188602	0.000530116	0.00323903	2.48959	0.215979	6.90805e-05	0.000437364	3.35916	0.231368	1.94916e-05	0.000170311	3.76876	-0.122056	0.0257055	0.0583686	-1.23382	-0.137348	0.011983	0.0311348	-1.50675	0.236832	1.21755e-05	8.38841e-05	4.07632	0.229823	2.22192e-05	0.000146912	3.83294	0.0358273	0.514064	0.696339	0.157179	0.0692064	0.207105	0.382123	0.417797	0.0422574	0.44146	0.692554	0.159547	0.0435663	0.427431	0.70076
318	GO_CELL_DEATH	765	-0.154476	0.00436057	0.0119316	-1.9233	-0.0739846	0.174137	0.28062	-0.551881	-0.0103922	0.848808	0.894447	-0.0484452	-0.038805	0.4764	0.590327	-0.228907	0.056519	0.299451	0.398845	0.399195	0.0142796	0.793355	0.844238	0.0735352	-0.0587435	0.280802	0.376748	-0.423948	-0.0686355	0.207477	0.296079	-0.528592	-0.153128	0.00471853	0.0550081	-1.25957	-0.121233	0.0256061	0.144872	-0.839014	-0.0842594	0.121525	0.377384	-0.423216	-0.0975462	0.0728672	0.319499
319	GO_CELL_DEATH_IN_RESPONSE_TO_OXIDATIVE_STRESS	16	-0.0199966	0.713185	0.794021	-0.100168	-0.0866631	0.110662	0.197355	-0.704751	0.019989	0.713289	0.787299	0.10386	0.0264052	0.627382	0.722923	0.140908	0.028183	0.604384	0.687576	0.162679	0.030457	0.57553	0.66086	0.17989	-0.0148569	0.784781	0.833386	-0.0791538	-0.0277879	0.609462	0.693175	-0.159157	-0.133582	0.0137487	0.0926882	-1.03298	-0.0985884	0.0694463	0.215369	-0.666817	-0.0877155	0.106385	0.358393	-0.44564	-0.086065	0.113151	0.382642
320	GO_CELL_DEVELOPMENT	884	0.066807	0.220556	0.320244	0.494519	0.136244	0.0121682	0.0349805	1.45617	0.221667	3.93145e-05	0.00028835	3.54008	0.180865	0.000836452	0.00355272	2.44944	-0.239764	8.31731e-06	0.000100796	-3.99656	-0.268737	5.30549e-07	1.1139e-05	-4.95315	0.200676	0.000204366	0.000905341	3.04319	0.194806	0.000314849	0.00135153	2.86917	-0.0890181	0.102309	0.279771	-0.553197	-0.121071	0.0260271	0.145503	-0.837127	0.0598905	0.272213	0.555193	0.255556	0.0255763	0.639391	0.835442
321	GO_CELL_DIFFERENTIATION_IN_SPINAL_CORD	23	-0.0938545	0.083983	0.1459	-0.835945	0.0411543	0.449231	0.570228	0.243952	0.160366	0.0030538	0.00991813	2.00357	0.101813	0.0607777	0.119346	0.923191	-0.212351	8.23408e-05	0.000654883	-3.18384	-0.157338	0.00366326	0.0123128	-1.90964	0.115255	0.033681	0.0654416	1.18415	0.109015	0.044607	0.0837681	1.07692	-0.107067	0.0485763	0.188084	-0.725649	-0.151353	0.00520205	0.0819561	-1.08642	-0.0426953	0.432425	0.687669	-0.162621	-0.07787	0.151865	0.439695
322	GO_CELL_DIFFERENTIATION_INVOLVED_IN_EMBRYONIC_PLACENTA_DEVELOPMENT	16	0.0243941	0.65384	0.742695	0.12919	0.0226196	0.677551	0.766577	0.115444	0.0877918	0.10608	0.176006	0.754473	0.105817	0.0512749	0.10391	0.983342	0.0419039	0.44101	0.538203	0.269054	0.0112164	0.836658	0.878085	0.0564635	0.094829	0.0808051	0.135542	0.867926	0.0874825	0.10732	0.173325	0.76114	-0.107841	0.0469647	0.185928	-0.730654	-0.0404958	0.456525	0.616491	-0.210073	-0.100803	0.0633899	0.283654	-0.547211	-0.103969	0.0554933	0.277467
323	GO_CELL_DIFFERENTIATION_INVOLVED_IN_KIDNEY_DEVELOPMENT	21	0.00483466	0.92919	0.956766	0.0191941	-0.0508707	0.349526	0.473227	-0.32493	0.0433975	0.424888	0.526651	0.278477	0.0354297	0.514798	0.626544	0.203048	-0.0418434	0.44167	0.538528	-0.268791	-0.0441611	0.416779	0.514155	-0.288906	0.00173877	0.974506	0.981373	0.00816574	0.000124874	0.998171	0.998622	0.000599002	-0.153223	0.00466804	0.0550081	-1.25957	-0.120253	0.0266588	0.146563	-0.833977	-0.0648935	0.232573	0.515602	-0.287686	-0.0602921	0.267434	0.567055
324	GO_CELL_DIVISION	407	0.361843	5.89897e-12	2.61324e-10	9.58282	0.231534	1.61564e-05	0.000260107	3.58485	0.221093	3.90965e-05	0.000287704	3.54105	0.244304	5.17936e-06	6.70893e-05	4.17335	-0.13804	0.0108289	0.0298334	-1.5253	-0.164417	0.00235594	0.00870459	-2.06025	0.261413	1.02012e-06	1.14207e-05	4.94231	0.257331	1.5192e-06	1.75719e-05	4.75518	0.0741982	0.172256	0.381243	0.418799	0.100258	0.0648179	0.209063	0.679724	0.0895725	0.0991744	0.347032	0.45963	0.0918268	0.0909247	0.348612
325	GO_CELL_DIVISION_SITE	47	0.250581	3.11869e-06	2.19441e-05	4.65868	0.14882	0.00601282	0.0204113	1.69013	0.191342	0.000397132	0.0018326	2.73693	0.194372	0.000319554	0.00157994	2.80136	-0.126884	0.019313	0.0464729	-1.3328	-0.168853	0.00180396	0.00704457	-2.15215	0.199904	0.000213124	0.000936647	3.02842	0.192817	0.000357404	0.00149227	2.82615	-0.0259225	0.633691	0.784397	-0.105464	-0.0274765	0.613478	0.742138	-0.129516	0.0450938	0.406999	0.668275	0.175044	0.0374151	0.491511	0.743954
326	GO_CELL_FATE_COMMITMENT	109	-0.0695743	0.200539	0.296426	-0.528084	-0.0026367	0.961348	0.975663	-0.0107	0.0439028	0.419512	0.52174	0.282546	0.0288697	0.595603	0.697284	0.15659	-0.0923902	0.0889467	0.15362	-0.813554	-0.0909268	0.09414	0.158994	-0.79862	0.02482	0.648199	0.723305	0.140679	0.0218025	0.688578	0.759184	0.119653	-0.0748303	0.168538	0.377239	-0.423384	-0.080863	0.136701	0.30539	-0.515146	-0.0107101	0.843934	0.93349	-0.0298905	-0.0310591	0.568001	0.799861
327	GO_CELL_FATE_COMMITMENT_INVOLVED_IN_FORMATION_OF_PRIMARY_GERM_LAYER	16	0.0215415	0.692115	0.775631	0.110345	-0.0606176	0.264857	0.38576	-0.413682	-0.0797981	0.141957	0.222688	-0.652303	-0.0389561	0.473834	0.588144	-0.230516	0.0750709	0.167171	0.252495	0.597748	0.0596677	0.272427	0.369294	0.432628	-0.0740279	0.17316	0.254343	-0.59458	-0.0741195	0.172628	0.254574	-0.594186	-0.0297298	0.584687	0.747738	-0.12625	0.00475925	0.930292	0.959051	0.0181581	-0.0303422	0.576971	0.78421	-0.105568	-0.0165804	0.760535	0.897011
328	GO_CELL_FATE_DETERMINATION	20	-0.113997	0.0356789	0.0712401	-1.14728	-0.0532332	0.327579	0.449698	-0.347079	-0.04515	0.406415	0.509247	-0.293071	-0.054155	0.319263	0.436659	-0.359858	0.000279669	0.995901	0.997026	0.00129353	0.00246847	0.963812	0.97526	0.0108796	-0.0445323	0.41287	0.51348	-0.289477	-0.0462705	0.394858	0.498354	-0.302462	-0.0148603	0.784734	0.881209	-0.054921	-0.0294831	0.587809	0.722529	-0.141145	-0.000864958	0.987317	0.994888	-0.00222601	-0.0101068	0.852622	0.93958
329	GO_CELL_FATE_SPECIFICATION	29	-0.00385094	0.943572	0.966703	-0.0147071	0.048383	0.373617	0.497034	0.303614	0.0590147	0.277717	0.380188	0.420002	0.0388898	0.474587	0.588584	0.230192	-0.139284	0.0101789	0.028378	-1.54702	-0.134527	0.01309	0.0334613	-1.47546	0.0544099	0.316988	0.415461	0.38147	0.0548019	0.31351	0.41569	0.38123	-0.016771	0.757869	0.865076	-0.0629458	-0.0562583	0.300809	0.469715	-0.328165	0.0445736	0.412437	0.67148	0.172967	0.0250801	0.644763	0.838755
330	GO_CELL_GROWTH	102	0.0735208	0.176129	0.267668	0.572404	0.12853	0.0177894	0.0472688	1.32543	0.183136	0.000703952	0.00297001	2.52724	0.148779	0.00602659	0.0182611	1.73847	-0.157191	0.00369551	0.0126613	-1.89752	-0.185665	0.00059156	0.00291503	-2.53536	0.172108	0.00146476	0.0047364	2.32455	0.159421	0.00323323	0.00944802	2.02466	-0.0844621	0.120041	0.307389	-0.512312	-0.0916418	0.0915729	0.247963	-0.605612	0.0483491	0.373952	0.644845	0.190545	0.0229698	0.672845	0.854805
331	GO_CELL_JUNCTION	786	0.134762	0.013286	0.0308313	1.51101	0.124041	0.0227605	0.0576495	1.2392	0.237391	1.05852e-05	0.000103973	3.98308	0.220315	4.51027e-05	0.000320714	3.49388	-0.244846	5.42902e-06	7.13666e-05	-4.1465	-0.262613	1.01296e-06	1.81676e-05	-4.7407	0.215119	6.85964e-05	0.00036005	3.44364	0.207017	0.000129322	0.00063527	3.19704	-0.0818	0.133982	0.329197	-0.482544	-0.105486	0.05303	0.190867	-0.719269	0.0629872	0.248852	0.535018	0.271632	0.035589	0.514978	0.76172
332	GO_CELL_JUNCTION_ASSEMBLY	99	0.0963046	0.0761792	0.134398	0.871606	0.127462	0.0187658	0.0491908	1.30812	0.265525	7.47244e-07	1.18648e-05	4.92574	0.228599	2.18785e-05	0.000185319	3.73208	-0.245111	5.15022e-06	6.83097e-05	-4.16552	-0.259589	1.3316e-06	2.30517e-05	-4.6373	0.226572	2.59463e-05	0.000159642	3.79685	0.214849	6.75788e-05	0.000376098	3.4247	-0.106947	0.0488289	0.188314	-0.725116	-0.129476	0.0169622	0.127576	-0.89423	0.0298143	0.583619	0.787156	0.103939	-0.00268494	0.960641	0.981014
333	GO_CELL_JUNCTION_ORGANIZATION	132	0.0899773	0.0976374	0.164712	0.783275	0.107326	0.0480311	0.10319	0.986362	0.218599	5.00252e-05	0.000340929	3.46734	0.190086	0.000434139	0.00203302	2.69186	-0.192489	0.0003659	0.00210594	-2.67655	-0.219517	4.6439e-05	0.000391857	-3.40687	0.182203	0.000750171	0.00270184	2.56834	0.173558	0.00133334	0.00450548	2.34626	-0.0982125	0.0705196	0.23158	-0.635298	-0.107002	0.0487131	0.183712	-0.735861	0.0136039	0.802541	0.910437	0.0407499	-0.0134369	0.804916	0.91736
334	GO_CELL_KILLING	25	-0.0887988	0.102121	0.170845	-0.767398	-0.102703	0.0585465	0.120297	-0.919744	-0.144671	0.00758814	0.0208792	-1.68029	-0.136547	0.0117743	0.0314219	-1.50277	0.130435	0.0161576	0.0404624	1.39295	0.0966319	0.0751829	0.132641	0.877324	-0.142775	0.00842369	0.0205151	-1.68793	-0.139287	0.0101773	0.024583	-1.60936	-0.0664173	0.22177	0.440317	-0.356234	-0.0509766	0.348522	0.517931	-0.285728	-0.0583323	0.283318	0.562547	-0.249841	-0.0573159	0.291802	0.592159
335	GO_CELL_LEADING_EDGE	277	0.188624	0.000471077	0.00177455	2.75091	0.175832	0.00113139	0.00575439	2.24	0.284544	9.38914e-08	2.47583e-06	5.60628	0.252272	2.46567e-06	3.88715e-05	4.41037	-0.296397	2.53532e-08	1.01184e-06	-5.99489	-0.313592	3.40422e-09	2.01076e-07	-6.69664	0.260697	1.0944e-06	1.20903e-05	4.91756	0.252594	2.39166e-06	2.46397e-05	4.60837	-0.0551527	0.310586	0.527365	-0.277888	-0.103807	0.055848	0.194349	-0.711417	0.0960267	0.0770254	0.306579	0.513457	0.068274	0.20921	0.50554
336	GO_CELL_MATRIX_ADHESION	77	-0.087615	0.106788	0.177313	-0.751261	-0.0373471	0.492301	0.611922	-0.213304	0.0796998	0.14245	0.223145	0.651412	0.0227377	0.675962	0.761667	0.118235	-0.0895874	0.0991031	0.167373	-0.776315	-0.0928717	0.0872892	0.149818	-0.824436	0.0229805	0.672702	0.741887	0.129662	0.015314	0.77833	0.832047	0.0798522	-0.154442	0.00434721	0.0539443	-1.26805	-0.173838	0.00130931	0.0617074	-1.20966	-0.0392776	0.470191	0.712345	-0.147309	-0.0584385	0.282441	0.583018
337	GO_CELL_MATURATION	76	-0.101659	0.0611701	0.112162	-0.950154	0.0179492	0.741445	0.817998	0.0872479	0.0975537	0.0724339	0.129649	0.887229	0.0498476	0.359312	0.476858	0.321611	-0.14213	0.00872615	0.0251294	-1.59982	-0.143942	0.00790026	0.0224203	-1.64936	0.0597828	0.271502	0.367365	0.434902	0.0565972	0.297903	0.398102	0.400005	-0.107662	0.0473337	0.18639	-0.729578	-0.11543	0.0334114	0.158543	-0.799854	-0.0140002	0.796913	0.907072	-0.0423583	-0.041667	0.443599	0.709797
338	GO_CELL_MORPHOGENESIS_INVOLVED_IN_DIFFERENTIATION	337	0.0843689	0.120451	0.195673	0.708469	0.145567	0.00721965	0.0234013	1.63076	0.237007	1.06086e-05	0.000103973	3.98308	0.204137	0.000155189	0.000883907	3.05359	-0.247375	4.19055e-06	5.80129e-05	-4.23648	-0.2803	1.67074e-07	4.48171e-06	-5.34856	0.215297	6.52116e-05	0.000346447	3.46036	0.208224	0.000113555	0.000570999	3.24336	-0.0947561	0.0810396	0.248694	-0.604335	-0.128674	0.0176609	0.131051	-0.882559	0.0516676	0.342021	0.61692	0.209771	0.0170613	0.753811	0.895037
339	GO_CELL_MORPHOGENESIS_INVOLVED_IN_NEURON_DIFFERENTIATION	231	0.0995981	0.0666098	0.120049	0.92064	0.211108	8.75982e-05	0.00082566	3.0832	0.268588	4.98373e-07	9.01139e-06	5.04521	0.247886	3.72143e-06	5.21707e-05	4.28257	-0.297553	2.22413e-08	9.20831e-07	-6.03582	-0.330636	4.08257e-10	4.41117e-08	-7.35545	0.269909	4.35768e-07	5.90352e-06	5.22889	0.263886	7.98837e-07	1.08338e-05	4.96522	-0.0431149	0.428104	0.634281	-0.197718	-0.091048	0.0937102	0.250989	-0.600345	0.100069	0.0653277	0.288294	0.540165	0.0582022	0.284551	0.584135
340	GO_CELL_MOTILITY	505	0.0101772	0.851682	0.898003	0.0467221	0.0604023	0.266708	0.387763	0.411433	0.169177	0.00174466	0.00628871	2.20144	0.148234	0.00617436	0.0186071	1.73032	-0.151246	0.00519537	0.0164868	-1.78286	-0.163906	0.00243201	0.00889661	-2.05078	0.13061	0.0159615	0.0351614	1.45393	0.119655	0.0273747	0.0554504	1.2561	-0.11781	0.0298652	0.143	-0.844664	-0.109604	0.0434198	0.173318	-0.761155	-0.0173969	0.749253	0.880655	-0.0551941	-0.0405336	0.456298	0.721928
341	GO_CELL_PART_MORPHOGENESIS	446	0.177538	0.00100998	0.00342588	2.46523	0.280521	1.44463e-07	1.03221e-05	4.98623	0.351316	2.59608e-11	6.05297e-09	8.21803	0.326882	6.58799e-10	1.32658e-07	6.87727	-0.378858	4.77993e-13	7.05836e-10	-9.1513	-0.386463	1.48135e-13	2.95751e-10	-9.52907	0.361734	5.99183e-12	1.10599e-09	8.95625	0.354744	1.61197e-11	3.1048e-09	8.50797	0.0053708	0.921401	0.961104	0.0172297	-0.0536103	0.324333	0.494934	-0.305452	0.144536	0.00760013	0.106996	0.970633	0.0995607	0.0667126	0.307211
342	GO_CELL_PROJECTION_ASSEMBLY	215	0.219174	4.57858e-05	0.000235303	3.62837	0.279024	1.69296e-07	1.13159e-05	4.94631	0.310125	5.15727e-09	2.71985e-07	6.56546	0.284306	9.63373e-08	3.62137e-06	5.44113	-0.335833	2.08209e-10	2.97538e-08	-7.52646	-0.320605	1.44539e-09	1.09567e-07	-6.96032	0.335648	2.13294e-10	1.68731e-08	7.7728	0.335392	2.20557e-10	2.22061e-08	7.65353	0.0949691	0.0803517	0.247709	0.606058	0.0461223	0.396565	0.561348	0.250768	0.157234	0.00365285	0.074572	1.12742	0.127429	0.018743	0.180897
343	GO_CELL_PROJECTION_CYTOPLASM	40	-0.0312264	0.565917	0.668536	-0.174875	-0.0289747	0.594265	0.698374	-0.155912	0.0481888	0.375539	0.479908	0.318842	0.033508	0.537869	0.647948	0.18846	-0.0516187	0.342478	0.441554	-0.355016	-0.0618974	0.254886	0.350146	-0.455751	0.00493939	0.927661	0.946118	0.0240549	0.00258358	0.962126	0.973331	0.0117393	-0.107288	0.0481103	0.187613	-0.726736	-0.120947	0.025792	0.145367	-0.837536	-0.0376863	0.488376	0.721251	-0.141914	-0.0389265	0.474171	0.731908
344	GO_CELL_PROJECTION_MEMBRANE	183	0.0792525	0.14471	0.226764	0.644425	0.116962	0.0311235	0.0735344	1.13351	0.214866	6.74903e-05	0.000431431	3.36509	0.179485	0.000901347	0.00379559	2.42072	-0.234702	1.29706e-05	0.000148092	-3.82947	-0.267345	6.24218e-07	1.257e-05	-4.90067	0.182752	0.000722625	0.00262364	2.5811	0.176736	0.00108247	0.00378779	2.42161	-0.0811262	0.135426	0.33164	-0.479333	-0.116174	0.0322832	0.156845	-0.804529	0.0429346	0.429847	0.685465	0.164015	0.0179522	0.741402	0.891033
345	GO_CELL_PROJECTION_ORGANIZATION	638	0.163479	0.00253452	0.00751534	2.12405	0.251757	2.67855e-06	7.39908e-05	4.13082	0.340308	1.22918e-10	2.01676e-08	7.69535	0.306808	8.03343e-09	5.65348e-07	6.24768	-0.358611	1.00328e-11	2.96303e-09	-8.52826	-0.374896	9.39301e-13	1.04028e-09	-8.98285	0.338343	1.59328e-10	1.3817e-08	7.85959	0.331036	4.11566e-10	3.44007e-08	7.46343	-0.0302643	0.578694	0.742547	-0.129276	-0.0797619	0.142789	0.312619	-0.504985	0.128625	0.0178202	0.166015	0.779851	0.083954	0.122886	0.400684
346	GO_CELL_PROJECTION_PART	624	0.117156	0.0307935	0.0632137	1.19919	0.171322	0.00151991	0.00710253	2.14859	0.291431	4.42022e-08	1.41895e-06	5.84803	0.251155	2.74008e-06	4.17132e-05	4.37973	-0.306538	7.88135e-09	4.4762e-07	-6.34909	-0.317398	2.14447e-09	1.46154e-07	-6.83519	0.263189	8.56039e-07	9.97962e-06	5.00089	0.255243	1.85756e-06	2.02187e-05	4.69425	-0.0541537	0.319446	0.535852	-0.270955	-0.10998	0.0427016	0.172756	-0.762566	0.0933871	0.0855432	0.320064	0.494763	0.0604346	0.266451	0.565858
347	GO_CELL_PROLIFERATION	467	0.207131	0.00011955	0.000534957	3.27168	0.0957787	0.0777953	0.150036	0.823804	0.165914	0.00214529	0.00745968	2.12728	0.159419	0.00320268	0.0109054	1.96236	-0.10134	0.0619651	0.115958	-0.935698	-0.129082	0.0172492	0.0415293	-1.38165	0.156839	0.00374028	0.0104014	1.98291	0.146728	0.00672341	0.0173672	1.76027	-0.0718559	0.186239	0.400532	-0.397363	-0.0394928	0.467954	0.627243	-0.202564	0.00354494	0.948075	0.974923	0.0110295	-0.00594522	0.913027	0.964633
348	GO_CELL_PROLIFERATION_IN_FOREBRAIN	16	0.200107	0.000209931	0.000865113	3.06293	0.271277	4.21333e-07	2.48867e-05	4.60403	0.265721	7.32908e-07	1.16791e-05	4.93259	0.272319	3.79267e-07	9.4924e-06	5.02262	-0.25543	1.98018e-06	3.12178e-05	-4.5056	-0.289084	6.58137e-08	2.20875e-06	-5.65585	0.304467	1.1941e-08	3.43498e-07	6.46408	0.302096	1.56327e-08	4.74334e-07	6.32392	0.0642377	0.237335	0.456929	0.340151	0.0215247	0.692343	0.80248	0.0955656	0.133982	0.0134668	0.146221	0.834991	0.121605	0.024992	0.199504
349	GO_CELL_RECOGNITION	60	0.0812727	0.13472	0.213807	0.669978	0.146255	0.0069475	0.022822	1.64165	0.231345	1.73211e-05	0.000151645	3.81917	0.216883	5.74439e-05	0.000390901	3.40793	-0.239753	8.32759e-06	0.000100796	-3.99656	-0.21977	4.54924e-05	0.000384602	-3.41499	0.22054	4.2729e-05	0.000244876	3.61105	0.214167	7.13416e-05	0.000391143	3.40766	-0.0411714	0.449043	0.649448	-0.187456	-0.0427664	0.431658	0.594603	-0.225773	0.0449754	0.408234	0.669063	0.174533	0.0168461	0.756819	0.896389
350	GO_CELL_REDOX_HOMEOSTASIS	49	-0.0958961	0.0774378	0.136401	-0.865181	-0.063214	0.244905	0.36261	-0.44056	-0.0987258	0.0690573	0.124918	-0.903375	-0.0485152	0.372311	0.490145	-0.309675	0.120539	0.0262981	0.0593483	1.22659	0.0871617	0.108619	0.17815	0.749214	-0.0790488	0.145747	0.219836	-0.6579	-0.0823041	0.129829	0.201663	-0.695374	-0.012655	0.81606	0.900907	-0.0453202	0.0212108	0.696606	0.806366	0.0934678	-0.0546993	0.314418	0.593216	-0.226787	-0.0400766	0.461202	0.725285
351	GO_CELL_SEPARATION_AFTER_CYTOKINESIS	16	0.0826225	0.128347	0.206156	0.685805	0.0330149	0.543871	0.654982	0.183771	-0.0840786	0.121737	0.197039	-0.705448	-0.0398195	0.464084	0.578635	-0.237595	0.142325	0.00863354	0.0249559	1.60283	0.0915585	0.0918692	0.155931	0.807067	-0.0252783	0.642152	0.718911	-0.143325	-0.0237324	0.662641	0.738305	-0.131764	0.090896	0.094252	0.269726	0.569077	0.116785	0.0313813	0.156057	0.806716	0.0484822	0.372637	0.644333	0.19089	0.0667776	0.219269	0.514297
352	GO_CELL_SUBSTRATE_ADHERENS_JUNCTION_ASSEMBLY	20	-0.0111626	0.83743	0.888578	-0.0513043	0.0334668	0.538369	0.650566	0.186708	0.207847	0.000116904	0.000674331	3.17113	0.160275	0.00307062	0.0105285	1.97763	-0.219725	4.56599e-05	0.000417524	-3.37932	-0.178132	0.000986659	0.00436218	-2.3603	0.138883	0.0104001	0.0244676	1.61141	0.12944	0.0169928	0.0375452	1.42545	-0.142031	0.00877308	0.0726031	-1.13904	-0.182039	0.000758564	0.0560073	-1.25176	-0.0175312	0.747258	0.879171	-0.0559267	-0.0457979	0.399708	0.686542
353	GO_CELL_SUBSTRATE_ADHESION	112	0.0480767	0.376652	0.4876	0.311936	0.0596573	0.272511	0.39426	0.404218	0.175177	0.00119956	0.0046009	2.33716	0.124013	0.0222435	0.0523306	1.28124	-0.182697	0.000725324	0.00355581	-2.44906	-0.192475	0.000366276	0.0019778	-2.70382	0.13363	0.0137148	0.0308253	1.51109	0.126282	0.0198978	0.0426243	1.37034	-0.124955	0.0212422	0.116303	-0.934408	-0.153998	0.00446168	0.0804187	-1.09464	0.00288859	0.957658	0.978718	0.00934234	-0.0251671	0.643616	0.838347
354	GO_CELL_SUBSTRATE_JUNCTION	369	0.207879	0.000112809	0.000509941	3.29248	0.0429046	0.430362	0.55197	0.258084	0.134704	0.0129183	0.0318288	1.49718	0.138424	0.0106086	0.0289921	1.53772	-0.108665	0.0452595	0.090315	-1.04424	-0.123325	0.0229472	0.0520246	-1.28379	0.101744	0.060927	0.107021	0.970531	0.0955856	0.078399	0.133889	0.873256	-0.0571974	0.292963	0.510249	-0.292218	-0.0537024	0.323501	0.494345	-0.305969	0.0320401	0.556019	0.769738	0.113657	0.0265184	0.626074	0.827172
355	GO_CELL_SUBSTRATE_JUNCTION_ASSEMBLY	34	-0.040813	0.453004	0.562919	-0.249554	-0.0314624	0.562983	0.671156	-0.173176	0.154741	0.00427163	0.0129968	1.88616	0.145581	0.00721389	0.0212483	1.67267	-0.0969394	0.0742567	0.13356	-0.874325	-0.0825502	0.128683	0.204104	-0.690148	0.0908975	0.0942464	0.154234	0.81182	0.0754708	0.164916	0.244995	0.610842	-0.181378	0.000793357	0.0274216	-1.56191	-0.153923	0.00448116	0.0804187	-1.09464	-0.115517	0.0332768	0.222425	-0.652816	-0.128561	0.0177613	0.177613
356	GO_CELL_SURFACE	377	-0.0748114	0.168646	0.258334	-0.587818	-0.026418	0.627215	0.725663	-0.139265	0.0591597	0.276536	0.378922	0.42145	0.0211153	0.697905	0.778575	0.1087	-0.0450034	0.407941	0.507349	-0.294693	-0.0722336	0.183835	0.269666	-0.569174	0.0103245	0.849485	0.883799	0.0536464	0.00245657	0.963987	0.974024	0.0114304	-0.12623	0.0199492	0.112294	-0.949645	-0.128355	0.0179465	0.131378	-0.881479	-0.0289475	0.594611	0.791743	-0.101416	-0.0443769	0.414504	0.696866
357	GO_CELL_SURFACE_RECEPTOR_SIGNALING_PATHWAY_INVOLVED_IN_CELL_CELL_SIGNALING	25	-0.132677	0.014407	0.0331376	-1.47968	-0.178663	0.000952345	0.00502847	-2.29856	0.00443287	0.935062	0.954013	0.0204458	-0.0389332	0.474095	0.588302	-0.2304	0.039207	0.470989	0.568678	0.245133	0.0613222	0.259335	0.354942	0.449843	-0.0991938	0.0677455	0.116863	-0.932322	-0.108088	0.0464608	0.0866616	-1.06217	-0.193153	0.000348878	0.0195071	-1.70981	-0.162967	0.00260559	0.0735497	-1.13342	-0.192895	0.000355414	0.0256152	-1.5915	-0.202589	0.000174403	0.0267881
358	GO_CELLULAR_ALDEHYDE_METABOLIC_PROCESS	62	-0.0279134	0.607847	0.703438	-0.152774	-0.1017	0.0610632	0.12443	-0.905076	-0.0785707	0.148205	0.230449	-0.637425	-0.0739943	0.173355	0.272328	-0.564908	0.0712086	0.190147	0.280526	0.552026	0.0699758	0.197949	0.285546	0.544323	-0.0985771	0.0694784	0.119391	-0.923029	-0.102784	0.0583473	0.104015	-0.982902	-0.0269822	0.619876	0.774062	-0.111224	-0.0135374	0.803488	0.879311	-0.0558575	-0.0237306	0.662666	0.830911	-0.0804454	-0.0208283	0.701814	0.871568
359	GO_CELLULAR_AMIDE_METABOLIC_PROCESS	610	-0.00095146	0.986096	0.991692	-0.00362321	-0.109904	0.0434675	0.0959115	-1.01813	-0.104639	0.0546165	0.102914	-0.987525	-0.0785097	0.149794	0.244415	-0.611873	0.0956588	0.0790576	0.139755	0.854634	0.110703	0.0419544	0.0845192	1.07304	-0.128496	0.0181071	0.0389012	-1.41004	-0.129433	0.0172751	0.038055	-1.41959	-0.0363792	0.50505	0.690891	-0.16059	-0.00812672	0.881667	0.929424	-0.0317859	-0.028618	0.600074	0.79543	-0.0993982	-0.0229734	0.673864	0.854873
360	GO_CELLULAR_AMINO_ACID_BIOSYNTHETIC_PROCESS	65	-0.00135651	0.98011	0.987093	-0.0056418	-0.0579201	0.286739	0.408704	-0.388591	-0.0907955	0.0946175	0.160166	-0.795428	-0.0711518	0.190502	0.293029	-0.53309	0.0754382	0.165099	0.249962	0.602126	0.0553729	0.308489	0.406849	0.390566	-0.0895275	0.0993296	0.161006	-0.793157	-0.0883887	0.103719	0.168674	-0.772952	0.026236	0.62959	0.781646	0.10699	0.0204952	0.70636	0.812773	0.0900308	0.0112466	0.836224	0.930135	0.031454	0.0131682	0.808741	0.918647
361	GO_CELLULAR_AMINO_ACID_CATABOLIC_PROCESS	70	-0.0614135	0.258625	0.366627	-0.435775	-0.00908343	0.8674	0.910996	-0.0404835	-0.0165774	0.760578	0.826837	-0.0825801	-0.00788232	0.884803	0.918305	-0.0370129	-0.0169258	0.755705	0.813838	-0.0894619	-0.0250151	0.645621	0.721701	-0.141642	-0.0277773	0.609599	0.689789	-0.161283	-0.0232904	0.668549	0.741901	-0.129654	0.0364488	0.502774	0.68935	0.16156	0.0276289	0.611512	0.740568	0.130435	0.0115461	0.831927	0.92762	0.0326298	0.00355539	0.947896	0.975873
362	GO_CELLULAR_AMINO_ACID_METABOLIC_PROCESS	244	-0.00898086	0.86895	0.912192	-0.0399139	-0.0565338	0.298608	0.420615	-0.376116	-0.0694904	0.201191	0.293375	-0.532576	-0.0484563	0.373078	0.491008	-0.308911	0.0210069	0.699523	0.768192	0.11453	0.00829634	0.878859	0.912004	0.0400034	-0.0779477	0.151523	0.226696	-0.644557	-0.0704277	0.195165	0.281898	-0.549908	0.015489	0.775975	0.877155	0.0569236	0.0110652	0.83891	0.902032	0.0447781	0.0114066	0.834012	0.929239	0.0318727	0.0119339	0.826458	0.926184
363	GO_CELLULAR_CARBOHYDRATE_BIOSYNTHETIC_PROCESS	39	-0.0400833	0.461127	0.571067	-0.243313	-0.0926021	0.0882142	0.165729	-0.780601	-0.0130324	0.810677	0.864956	-0.0630058	-0.0286831	0.597983	0.6997	-0.155088	0.04292	0.430004	0.528557	0.276908	0.0369141	0.497334	0.590509	0.228773	-0.0782019	0.150123	0.225058	-0.647706	-0.0847326	0.118856	0.188046	-0.725737	-0.128925	0.01744	0.105607	-0.976306	-0.132721	0.0143742	0.120146	-0.92029	-0.06589	0.225466	0.508304	-0.293877	-0.0736683	0.175262	0.468334
364	GO_CELLULAR_CARBOHYDRATE_CATABOLIC_PROCESS	24	0.0168671	0.756524	0.828748	0.0815773	0.0111819	0.837154	0.887647	0.0517595	0.0455747	0.402011	0.505222	0.296517	0.0449436	0.408565	0.527988	0.277376	-0.0456956	0.400763	0.500389	-0.300693	-0.0466976	0.390506	0.487915	-0.311656	0.0278893	0.608157	0.688861	0.161868	0.0275315	0.612768	0.695864	0.157476	-0.00150795	0.97789	0.990863	-0.0039866	-0.0085876	0.874577	0.924672	-0.0340124	0.022081	0.684812	0.843058	0.0741428	0.0161237	0.766939	0.899792
365	GO_CELLULAR_CARBOHYDRATE_METABOLIC_PROCESS	106	-0.0797987	0.141954	0.223237	-0.651234	-0.0387775	0.475865	0.596346	-0.224502	0.0841195	0.121555	0.196937	0.705673	0.0585552	0.281481	0.397258	0.400927	-0.0556568	0.306012	0.405058	-0.392483	-0.06106	0.261381	0.357271	-0.447002	0.0274084	0.614358	0.693866	0.158725	0.0194306	0.72096	0.786083	0.104532	-0.150435	0.0054837	0.057978	-1.23674	-0.156535	0.00384245	0.0804187	-1.09464	-0.0774542	0.154069	0.422729	-0.373938	-0.097434	0.0727862	0.319499
366	GO_CELLULAR_CHEMICAL_HOMEOSTASIS	313	-0.183036	0.000708741	0.00252592	-2.59758	-0.0984201	0.0699251	0.137797	-0.86076	-0.0187598	0.730212	0.800721	-0.0965186	-0.0481967	0.375461	0.493119	-0.307048	0.00338869	0.950336	0.965372	0.0153052	-0.0258556	0.634567	0.712418	-0.147265	-0.0814498	0.13387	0.204851	-0.688562	-0.083456	0.12453	0.195212	-0.709494	-0.160832	0.00296868	0.0459483	-1.33773	-0.172618	0.00141718	0.0617074	-1.20966	-0.0785389	0.14837	0.414168	-0.382823	-0.0924638	0.0886918	0.344956
367	GO_CELLULAR_COMPONENT_ASSEMBLY_INVOLVED_IN_MORPHOGENESIS	180	0.221949	3.80739e-05	0.000200301	3.69832	0.308973	7.10914e-09	1.66036e-06	5.7798	0.264691	8.1109e-07	1.26966e-05	4.89631	0.251679	2.81601e-06	4.25766e-05	4.37083	-0.321022	1.70294e-09	1.47922e-07	-6.82997	-0.299253	2.15278e-08	8.66985e-07	-6.06199	0.314176	3.86517e-09	1.50199e-07	6.82333	0.318743	2.2423e-09	1.15701e-07	6.93666	0.175774	0.0011534	0.0310719	1.50763	0.116	0.0325427	0.157729	0.802089	0.230343	1.88685e-05	0.00895524	2.04792	0.205836	0.000136391	0.0253903
368	GO_CELLULAR_COMPONENT_DISASSEMBLY	418	0.152024	0.00496631	0.0133988	1.87294	-0.069717	0.199722	0.311318	-0.506795	-0.00329839	0.951681	0.965411	-0.0152879	0.02159	0.691603	0.772907	0.111873	0.106522	0.0497007	0.0974653	1.01115	0.11808	0.0294888	0.0634768	1.19738	-0.0478521	0.379074	0.478706	-0.319931	-0.0567752	0.296546	0.396528	-0.401726	-0.0845644	0.119628	0.306863	-0.513056	-0.0203159	0.70895	0.814593	-0.0890592	-0.0939563	0.0836451	0.316867	-0.499123	-0.0781179	0.150628	0.439127
369	GO_CELLULAR_COMPONENT_DISASSEMBLY_INVOLVED_IN_EXECUTION_PHASE_OF_APOPTOSIS	35	0.0682425	0.209308	0.307052	0.512788	-0.0331755	0.541913	0.653778	-0.18457	-0.0188034	0.729609	0.800437	-0.0966726	-0.012833	0.81352	0.870038	-0.0604619	0.0843521	0.120525	0.19458	0.710901	0.0652126	0.230281	0.322218	0.49185	-0.0357939	0.510484	0.605473	-0.217905	-0.0348871	0.52126	0.616768	-0.209878	-0.0622235	0.252388	0.471565	-0.326459	-0.0455029	0.402753	0.566702	-0.246645	-0.044144	0.41696	0.67611	-0.169983	-0.0446416	0.411723	0.694303
370	GO_CELLULAR_COMPONENT_MORPHOGENESIS	628	0.160061	0.00312443	0.00891452	2.0499	0.220536	4.2026e-05	0.00050729	3.29474	0.277099	2.16054e-07	4.76179e-06	5.32223	0.255286	1.91601e-06	3.23966e-05	4.4895	-0.298576	2.07737e-08	8.7645e-07	-6.05727	-0.324882	8.97778e-10	7.79834e-08	-7.108	0.282247	1.25446e-07	2.1708e-06	5.66338	0.277783	2.01125e-07	3.57825e-06	5.44633	-0.0194952	0.720603	0.841621	-0.0748833	-0.0599085	0.271356	0.44195	-0.354626	0.117708	0.0302527	0.211453	0.674785	0.082703	0.128585	0.406301
371	GO_CELLULAR_GLUCOSE_HOMEOSTASIS	54	-0.20642	0.000130444	0.000577867	-3.23817	-0.123691	0.0225955	0.0573733	-1.24129	-0.0141648	0.794579	0.852709	-0.0691991	-0.0369495	0.496921	0.610472	-0.214334	0.0728366	0.180195	0.268414	0.571195	0.0565538	0.298273	0.397041	0.401165	-0.0837687	0.123121	0.19111	-0.718717	-0.0936178	0.0847697	0.143168	-0.844154	-0.223537	3.34054e-05	0.00778874	-2.10853	-0.209888	9.98297e-05	0.0332509	-1.4782	-0.169915	0.00168609	0.0537328	-1.26976	-0.181832	0.000769337	0.0400693
372	GO_CELLULAR_HOMEOSTASIS	393.5	-0.160817	0.00294157	0.00849487	-2.07084	-0.0649286	0.232448	0.348122	-0.458268	0.0089355	0.869606	0.908789	0.041537	-0.0169088	0.756061	0.825322	-0.0833763	-0.0282201	0.604081	0.687408	-0.162785	-0.0540428	0.320439	0.418992	-0.377794	-0.0453257	0.40478	0.505262	-0.296483	-0.0476979	0.380614	0.484239	-0.31494	-0.141172	0.00914572	0.0753077	-1.12316	-0.158238	0.00343929	0.0765048	-1.11631	-0.0618883	0.255099	0.541229	-0.266619	-0.0760865	0.161565	0.452136
373	GO_CELLULAR_HORMONE_METABOLIC_PROCESS	47	-0.215833	6.24839e-05	0.000306878	-3.51303	-0.204586	0.000149997	0.00121701	-2.91471	-0.254497	2.16242e-06	2.71375e-05	-4.56643	-0.256957	1.71295e-06	2.99067e-05	-4.52423	0.175817	0.00115011	0.00513609	2.28937	0.196351	0.00027679	0.00160075	2.79568	-0.268878	5.35881e-07	6.96174e-06	-5.15728	-0.265734	7.31982e-07	1.01133e-05	-4.99511	-0.0241675	0.656848	0.798967	-0.0974713	-0.0321436	0.554558	0.69852	-0.155821	-0.032912	0.545128	0.763248	-0.117335	-0.0254798	0.6395	0.835442
374	GO_CELLULAR_IRON_ION_HOMEOSTASIS	29	-0.192042	0.000377776	0.00145906	-2.83593	-0.171948	0.0014799	0.00698184	-2.15603	-0.153133	0.00469266	0.0140558	-1.85215	-0.137713	0.0110695	0.0299377	-1.52378	0.141072	0.00924296	0.0262813	1.58035	0.118781	0.0285823	0.0619167	1.20819	-0.188207	0.000495556	0.00190361	-2.72042	-0.18348	0.000687578	0.00259895	-2.5852	-0.0739891	0.173386	0.382329	-0.417563	-0.0506811	0.351327	0.520701	-0.283411	-0.117402	0.0304919	0.211846	-0.673979	-0.112045	0.0389762	0.23783
375	GO_CELLULAR_KETONE_METABOLIC_PROCESS	45	-0.0182682	0.737017	0.813602	-0.089588	-0.104778	0.0536127	0.112242	-0.949844	-0.101218	0.0623051	0.114864	-0.939816	-0.0898292	0.098192	0.176324	-0.753689	0.0797507	0.142195	0.221568	0.654494	0.106501	0.0497836	0.0967287	1.01444	-0.136805	0.0116152	0.0268697	-1.57074	-0.13964	0.00998616	0.024161	-1.61689	-0.0518862	0.339981	0.553719	-0.256711	-0.0502543	0.355402	0.523492	-0.28109	-0.0463535	0.39401	0.65855	-0.181412	-0.0472994	0.384423	0.673652
376	GO_CELLULAR_LIPID_CATABOLIC_PROCESS	106	-0.310816	5.73624e-09	9.17384e-08	-7.03745	-0.182241	0.000748211	0.00419036	-2.37775	-0.115714	0.032976	0.0689725	-1.16132	-0.165055	0.0022901	0.00825478	-2.08329	0.0916009	0.0917183	0.157485	0.80276	0.106472	0.0498461	0.0968077	1.01409	-0.185808	0.000585737	0.00217503	-2.66253	-0.191925	0.000380952	0.00157869	-2.8017	-0.128025	0.0182453	0.108347	-0.965185	-0.155036	0.00419823	0.0804187	-1.09464	-0.0947698	0.0809954	0.312658	-0.50493	-0.112576	0.0380549	0.235123
377	GO_CELLULAR_LIPID_METABOLIC_PROCESS	617	-0.130458	0.0162437	0.0367289	-1.43499	-0.0654344	0.229514	0.345128	-0.46202	0.0157877	0.772102	0.836491	0.0775385	-0.0119507	0.82647	0.879079	-0.0559722	-0.0564356	0.300166	0.39956	-0.398419	-0.0745789	0.170693	0.255377	-0.592819	-0.0329819	0.545057	0.635757	-0.196709	-0.0359812	0.509093	0.605445	-0.217926	-0.110781	0.0415052	0.173092	-0.761723	-0.137816	0.0110782	0.109784	-0.959463	-0.0361563	0.507032	0.734805	-0.133828	-0.0565397	0.299274	0.600717
378	GO_CELLULAR_MACROMOLECULAR_COMPLEX_ASSEMBLY	613	0.369299	2.49918e-12	1.49613e-10	9.82503	0.152024	0.00516291	0.0182245	1.73935	0.116587	0.0323873	0.0680626	1.16709	0.160712	0.00309059	0.0105888	1.97515	-0.0431882	0.42938	0.528082	-0.277298	-0.0694765	0.203296	0.291577	-0.535247	0.157323	0.00378702	0.0105182	1.97806	0.154619	0.00444099	0.0123268	1.90915	0.0820686	0.132705	0.327916	0.484238	0.126099	0.0205842	0.134742	0.870498	0.0886581	0.104226	0.354944	0.449841	0.105597	0.0527796	0.271273
379	GO_CELLULAR_METABOLIC_COMPOUND_SALVAGE	35	0.00328855	0.951802	0.971905	0.0123761	-0.0265587	0.625381	0.724297	-0.140083	-0.100831	0.063316	0.116338	-0.93428	-0.0691874	0.203058	0.308251	-0.511095	0.0776264	0.153153	0.23596	0.627162	0.00520379	0.9238	0.947103	0.0236027	-0.0979451	0.0712917	0.122033	-0.913522	-0.0876966	0.106461	0.172188	-0.763997	0.0469187	0.388265	0.59889	0.222653	0.0275629	0.612363	0.741193	0.130069	0.0388229	0.475348	0.713877	0.146376	0.0487112	0.370381	0.662409
380	GO_CELLULAR_MODIFIED_AMINO_ACID_BIOSYNTHETIC_PROCESS	39	-0.0439471	0.419043	0.529448	-0.276177	-0.144417	0.00769549	0.0245789	-1.60944	-0.164033	0.00243988	0.00828887	-2.0815	-0.131759	0.0151027	0.0385062	-1.41447	0.166429	0.00210181	0.00820355	2.086	0.139511	0.0100557	0.0270801	1.56735	-0.176444	0.00110353	0.00376629	-2.42409	-0.171826	0.0014916	0.0049275	-2.30737	-0.0201474	0.711118	0.836276	-0.0776504	0.0139975	0.796952	0.875421	0.057783	-0.0454355	0.403452	0.665658	-0.176749	-0.0298717	0.582894	0.808218
381	GO_CELLULAR_MODIFIED_AMINO_ACID_METABOLIC_PROCESS	144	-0.128235	0.0180011	0.0401534	-1.39628	-0.145671	0.0071343	0.0232556	-1.63347	-0.147787	0.00633294	0.0181116	-1.74204	-0.137349	0.0112354	0.0302203	-1.5197	0.0874561	0.107451	0.17749	0.750826	0.0791523	0.14528	0.224169	0.649424	-0.162535	0.00264736	0.00778221	-2.1089	-0.158153	0.00345702	0.00998995	-2.00044	-0.0368657	0.49809	0.686248	-0.163519	-0.0381543	0.483181	0.640099	-0.193753	-0.0413929	0.446798	0.698136	-0.15606	-0.0345185	0.525863	0.767505
382	GO_CELLULAR_MONOVALENT_INORGANIC_CATION_HOMEOSTASIS	58	-0.106091	0.0506717	0.0953592	-1.02064	-0.053174	0.328118	0.450035	-0.346754	0.0169129	0.755884	0.822339	0.0849489	-0.0145632	0.788935	0.852019	-0.0695509	-0.0813323	0.134433	0.212011	-0.673641	-0.0842184	0.121117	0.194471	-0.711144	-0.0304817	0.57522	0.661361	-0.179561	-0.0224236	0.68019	0.752622	-0.123423	-0.09771	0.071976	0.233763	-0.631225	-0.108005	0.0466299	0.179965	-0.744811	-0.0400463	0.461541	0.708254	-0.149811	-0.0504329	0.353693	0.647195
383	GO_CELLULAR_PIGMENTATION	38	-0.0889407	0.101573	0.170184	-0.769081	-0.0223616	0.681026	0.76904	-0.114051	-0.0263417	0.628211	0.716405	-0.144841	-0.0198956	0.714571	0.792774	-0.10085	0.0317775	0.559079	0.648865	0.187846	0.0242564	0.655667	0.729617	0.136905	-0.022629	0.677424	0.745401	-0.12761	-0.0281418	0.604913	0.688708	-0.161965	0.00328	0.951927	0.977473	0.00989506	0.0244304	0.653358	0.775348	0.110503	0.0083696	0.877735	0.944925	0.0246026	0.0176399	0.745745	0.89208
384	GO_CELLULAR_PROCESS_INVOLVED_IN_REPRODUCTION_IN_MULTICELLULAR_ORGANISM	147	0.302527	1.48884e-08	2.08061e-07	6.68181	0.212376	8.21789e-05	0.000797207	3.09843	0.312621	4.6426e-09	2.60853e-07	6.5836	0.287544	7.76641e-08	3.09957e-06	5.5087	-0.305982	1.00398e-08	5.35988e-07	-6.27084	-0.279843	1.75218e-07	4.648e-06	-5.33273	0.301998	1.58064e-08	4.32237e-07	6.36428	0.296337	2.97903e-08	7.99824e-07	6.09701	-0.00838059	0.877576	0.938595	-0.0275216	-0.0128779	0.81288	0.885215	-0.052951	0.0663917	0.221948	0.505037	0.296677	0.0395392	0.467237	0.728883
385	GO_CELLULAR_PROTEIN_COMPLEX_ASSEMBLY	278	0.328194	5.57733e-10	1.1386e-08	7.94363	0.130451	0.0160919	0.0437345	1.35918	0.107972	0.0466588	0.091177	1.04011	0.160485	0.00300181	0.0103363	1.98564	-0.0699489	0.198227	0.289626	-0.538163	-0.0920856	0.0900136	0.153134	-0.814929	0.125413	0.0207161	0.043539	1.36112	0.126945	0.019201	0.0413115	1.38393	0.0746909	0.169417	0.377968	0.422545	0.0999925	0.0655338	0.209893	0.678001	0.0966144	0.0752258	0.302538	0.51922	0.100307	0.0646872	0.300697
386	GO_CELLULAR_PROTEIN_COMPLEX_DISASSEMBLY	118	0.196076	0.00027528	0.00110062	2.95836	0.00518682	0.924085	0.949153	0.0226636	-0.0654697	0.228571	0.3259	-0.486916	-0.00492568	0.927897	0.950204	-0.0221831	0.122586	0.0237846	0.0547355	1.26173	0.110981	0.0408371	0.0828715	1.08159	-0.0388239	0.47553	0.573536	-0.241439	-0.0380613	0.48425	0.5831	-0.234257	0.0680313	0.210837	0.428248	0.368304	0.114363	0.0350397	0.16157	0.79164	0.0380072	0.484871	0.720143	0.142581	0.0616958	0.256583	0.556006
387	GO_CELLULAR_PROTEIN_COMPLEX_LOCALIZATION	19	0.113672	0.0362113	0.0719677	1.14286	0.0120798	0.824281	0.878837	0.0560918	0.031227	0.565909	0.657517	0.182093	0.0333526	0.539757	0.649409	0.187482	0.0115302	0.832154	0.874601	0.05819	-0.0112637	0.835979	0.87758	-0.0567135	0.0282508	0.603514	0.684653	0.16453	0.0328956	0.545329	0.638765	0.194659	-0.000870453	0.987237	0.994487	-0.0024009	0.0190071	0.726797	0.827615	0.0821717	-0.03855	0.478459	0.715491	-0.145396	-0.0299972	0.581312	0.80753
388	GO_CELLULAR_RESPIRATION	134	0.0276266	0.611713	0.70662	0.150814	-0.0473944	0.383655	0.505705	-0.296103	-0.0718306	0.186394	0.276811	-0.557817	-0.0307336	0.572246	0.67764	-0.169001	0.111818	0.0393328	0.080931	1.09189	0.120252	0.026608	0.0581516	1.23544	-0.0756649	0.163907	0.242846	-0.614669	-0.0761595	0.161161	0.240305	-0.619238	0.0316856	0.560399	0.728239	0.137726	0.0584366	0.282613	0.452794	0.344099	-0.0174615	0.748353	0.879831	-0.0556009	-0.0128855	0.812865	0.920734
389	GO_CELLULAR_RESPONSE_TO_ABIOTIC_STIMULUS	187	-0.0763343	0.160125	0.246904	-0.607472	-0.0343507	0.527689	0.641862	-0.192558	0.0487738	0.369766	0.474663	0.323614	0.0408035	0.453108	0.568793	0.245046	0.0512261	0.346166	0.44579	0.35087	0.0286743	0.598096	0.681472	0.166552	-0.000405458	0.994056	0.995686	-0.00187746	-0.0146734	0.787375	0.838076	-0.0767166	-0.15239	0.0048995	0.0555064	-1.25566	-0.108133	0.0463684	0.179965	-0.744811	-0.107999	0.0466411	0.251612	-0.599268	-0.120606	0.0262144	0.203226
390	GO_CELLULAR_RESPONSE_TO_ACID_CHEMICAL	122	-0.0037911	0.944447	0.966929	-0.0146055	0.0187778	0.729963	0.808839	0.0921381	0.0853411	0.116224	0.189639	0.722072	0.0461484	0.396108	0.515348	0.2879	-0.125639	0.0205399	0.0487629	-1.31191	-0.113182	0.0370249	0.0766299	-1.1156	0.0539351	0.321234	0.420031	0.376718	0.0475605	0.381802	0.485333	0.313961	-0.0853017	0.116393	0.301179	-0.521175	-0.112336	0.0384693	0.165521	-0.781146	0.0255179	0.638998	0.817313	0.0876114	-0.0017809	0.973888	0.987307
391	GO_CELLULAR_RESPONSE_TO_ALCOHOL	79	-0.0463496	0.39405	0.505837	-0.29599	0.0455845	0.40191	0.524264	0.28045	0.0598598	0.270885	0.373257	0.427993	0.0363078	0.50443	0.61747	0.209384	-0.0603211	0.267204	0.365443	-0.43718	-0.0891132	0.100909	0.167803	-0.7752	0.0466347	0.391145	0.49087	0.309034	0.04086	0.452483	0.554495	0.256102	-0.0668313	0.218897	0.437359	-0.359162	-0.0877811	0.106123	0.268336	-0.571321	0.0247159	0.649576	0.823313	0.0844351	0.00841387	0.877094	0.952568
392	GO_CELLULAR_RESPONSE_TO_ALKALOID	16	0.122278	0.0241954	0.0516213	1.28717	0.0641861	0.237712	0.354075	0.450905	0.0541614	0.319206	0.422998	0.373662	0.0950281	0.0801681	0.148448	0.828427	0.0094779	0.861698	0.897771	0.0468345	-0.0175483	0.74702	0.804661	-0.0943868	0.0760079	0.161924	0.240341	0.619173	0.0774197	0.154253	0.231562	0.635332	-0.0102699	0.850272	0.92028	-0.0360802	0.0511195	0.347171	0.517312	0.286247	-0.0203474	0.70838	0.857411	-0.0668108	-0.0151418	0.780759	0.904488
393	GO_CELLULAR_RESPONSE_TO_AMINO_ACID_STARVATION	23	-0.173348	0.00135167	0.00437713	-2.35881	-0.157664	0.00359264	0.0137083	-1.86302	-0.14796	0.00631279	0.0180657	-1.74315	-0.137752	0.0110466	0.0298939	-1.52442	0.15809	0.00350247	0.0121503	1.91541	0.0733892	0.176906	0.262104	0.581526	-0.186189	0.000570466	0.00212546	-2.67255	-0.17981	0.000881901	0.00317886	-2.49773	-0.0843503	0.120534	0.308115	-0.511287	-0.0807027	0.137483	0.306178	-0.514026	-0.0970346	0.0739716	0.300361	-0.522356	-0.0848718	0.11825	0.391527
394	GO_CELLULAR_RESPONSE_TO_AMINO_ACID_STIMULUS	41	-0.0807424	0.137289	0.217275	-0.662991	-0.062879	0.247418	0.365378	-0.437258	-0.0634979	0.242789	0.342116	-0.465826	-0.0624153	0.250927	0.364628	-0.438149	0.00615668	0.909901	0.935451	0.0289788	-0.0151702	0.780358	0.833812	-0.0789316	-0.0845851	0.119501	0.186536	-0.729237	-0.0852009	0.116826	0.185631	-0.73135	-0.0205007	0.706285	0.832582	-0.079573	-0.030969	0.569124	0.708407	-0.149717	0.0326617	0.548191	0.764904	0.116393	0.0225399	0.678623	0.858698
395	GO_CELLULAR_RESPONSE_TO_BIOTIC_STIMULUS	107	-0.279138	1.88556e-07	1.8318e-06	-5.73712	-0.195658	0.000291117	0.0020829	-2.68133	-0.113537	0.0364337	0.0745159	-1.12775	-0.102524	0.0589913	0.116666	-0.933056	0.168888	0.00179998	0.00726885	2.13853	0.184604	0.000636511	0.00307832	2.51169	-0.169846	0.0016936	0.00537439	-2.26967	-0.180861	0.000821587	0.003003	-2.52245	-0.177295	0.0010431	0.0304009	-1.51711	-0.109131	0.04438	0.175382	-0.756014	-0.207227	0.000122614	0.0185661	-1.73128	-0.20692	0.000125542	0.0253903
396	GO_CELLULAR_RESPONSE_TO_CALCIUM_ION	31	-0.0337361	0.535104	0.641372	-0.19289	0.0398082	0.464211	0.583888	0.23367	0.0147394	0.786443	0.84685	0.0721935	0.0103667	0.848878	0.894938	0.0482072	-0.0211229	0.697801	0.766872	-0.115277	-0.0596812	0.272319	0.36926	-0.432667	0.033922	0.532855	0.624484	0.204479	0.0269721	0.620007	0.701387	0.154042	-0.024921	0.646863	0.793066	-0.100691	-0.0326617	0.548191	0.693854	-0.158732	0.0309983	0.568758	0.776935	0.109615	0.0155332	0.775241	0.902197
397	GO_CELLULAR_RESPONSE_TO_CAMP	29	0.0176206	0.746013	0.81964	0.0863767	0.113276	0.0368673	0.0842213	1.07458	0.108716	0.045197	0.0889101	1.05105	0.062171	0.252789	0.366806	0.435564	-0.157003	0.00373703	0.012774	-1.89367	-0.186675	0.0005515	0.00274511	-2.56144	0.106103	0.050647	0.0918028	1.03714	0.105221	0.0526059	0.0955883	1.0196	-0.00859615	0.874453	0.936385	-0.0285454	-0.0560711	0.302421	0.471452	-0.326562	0.0937729	0.0842534	0.318271	0.497202	0.0695031	0.201001	0.496913
398	GO_CELLULAR_RESPONSE_TO_CARBOHYDRATE_STIMULUS	53	-0.0992399	0.0676174	0.121322	-0.916059	-0.034471	0.526244	0.640826	-0.19326	0.0242298	0.65602	0.738356	0.131734	0.021805	0.688545	0.770405	0.113281	-0.0252489	0.642538	0.720983	-0.142075	-0.0335798	0.536998	0.627017	-0.202721	-0.0116154	0.830933	0.869193	-0.0608837	-0.0198626	0.715023	0.781119	-0.107283	-0.12803	0.0182405	0.108347	-0.965185	-0.129753	0.0167262	0.127332	-0.895062	-0.0425234	0.434281	0.688637	-0.162009	-0.0597642	0.271652	0.571694
399	GO_CELLULAR_RESPONSE_TO_CORTICOSTEROID_STIMULUS	36	-0.261934	1.06155e-06	8.36777e-06	-5.07739	-0.144067	0.00784587	0.0249739	-1.60251	-0.124132	0.022115	0.0499589	-1.30139	-0.14168	0.00894269	0.0251851	-1.59886	0.138113	0.0108365	0.0298356	1.52526	0.120606	0.0262144	0.0574617	1.24062	-0.160178	0.00308873	0.00882209	-2.05443	-0.169749	0.00170402	0.00551813	-2.25821	-0.125352	0.0208324	0.115072	-0.939032	-0.122165	0.0243278	0.142367	-0.84659	-0.0775342	0.153643	0.422729	-0.373938	-0.0847298	0.118868	0.391702
400	GO_CELLULAR_RESPONSE_TO_CYTOKINE_STIMULUS	363	-0.234382	1.3336e-05	7.96203e-05	-4.09898	-0.135528	0.0124229	0.0355285	-1.44942	-0.129828	0.0166628	0.0395373	-1.40299	-0.145225	0.00735834	0.0215734	-1.66608	0.14905	0.00593481	0.0183214	1.73704	0.135466	0.0124636	0.0321945	1.49222	-0.153995	0.00446232	0.0121128	-1.91676	-0.159681	0.003183	0.00932586	-2.03031	-0.119486	0.0276467	0.136538	-0.864746	-0.0826149	0.128382	0.29512	-0.530002	-0.105444	0.0521037	0.262593	-0.580716	-0.1172	0.0307798	0.214057
401	GO_CELLULAR_RESPONSE_TO_DEXAMETHASONE_STIMULUS	20	-0.237127	1.04973e-05	6.45873e-05	-4.18985	-0.0320898	0.555221	0.664226	-0.177684	-0.0623285	0.251587	0.351476	-0.454104	-0.0888723	0.101837	0.181398	-0.741368	0.0624672	0.250533	0.348684	0.457568	0.0148166	0.785351	0.837531	0.0769991	-0.0745207	0.17031	0.25074	-0.600777	-0.0817215	0.132574	0.20485	-0.688565	-0.0788174	0.146933	0.349203	-0.456923	-0.0892576	0.100356	0.260903	-0.583521	-0.00643085	0.905906	0.957339	-0.0189342	-0.02498	0.646085	0.839096
402	GO_CELLULAR_RESPONSE_TO_DNA_DAMAGE_STIMULUS	649	0.308701	6.76917e-09	1.05589e-07	6.97638	0.195809	0.000292692	0.00208796	2.68028	0.206288	0.000133626	0.000748699	3.12569	0.220023	4.49961e-05	0.000320714	3.49388	-0.105201	0.0533237	0.103335	-0.985752	-0.123666	0.0229734	0.0520308	-1.28374	0.236618	1.09936e-05	7.71753e-05	4.11252	0.229067	2.11468e-05	0.000140872	3.85117	0.0524567	0.336303	0.549563	0.259982	0.0817712	0.133539	0.300752	0.521791	0.0627702	0.249783	0.535594	0.271164	0.0613809	0.260439	0.559669
403	GO_CELLULAR_RESPONSE_TO_DRUG	43	-0.121176	0.0255103	0.0539946	-1.26765	-0.0992152	0.0676861	0.134408	-0.871575	-0.0635929	0.242084	0.34143	-0.466699	-0.0599431	0.270217	0.384784	-0.414783	0.140957	0.00930082	0.0263781	1.57876	0.104268	0.0547913	0.103273	0.986013	-0.0963874	0.0759264	0.128723	-0.890343	-0.0983731	0.0700594	0.121378	-0.915861	-0.135124	0.0126883	0.0890982	-1.05013	-0.0971045	0.0737629	0.221539	-0.65455	-0.140233	0.00967197	0.120019	-0.92075	-0.133853	0.0135574	0.157776
404	GO_CELLULAR_RESPONSE_TO_DSRNA	30	0.173107	0.00137298	0.00443318	2.35328	0.167434	0.00197335	0.00867256	2.06185	0.0897593	0.0984548	0.165524	0.78114	0.129108	0.0172796	0.0427885	1.36867	-0.0782923	0.149652	0.23156	-0.635336	-0.0659594	0.224978	0.315696	-0.500731	0.139175	0.0102388	0.024165	1.61681	0.134794	0.012909	0.0298808	1.52461	0.0906084	0.0953016	0.271478	0.566265	0.0880691	0.104978	0.266682	0.574007	0.0990815	0.0680585	0.292862	0.533336	0.0834643	0.124493	0.401992
405	GO_CELLULAR_RESPONSE_TO_ENDOGENOUS_STIMULUS	681	-0.073444	0.177958	0.270076	-0.568513	-0.014163	0.795302	0.858797	-0.0661094	0.0537081	0.324887	0.429516	0.367021	0.031607	0.562535	0.668463	0.174923	-0.0472003	0.38702	0.48735	-0.312159	-0.0802791	0.140798	0.218702	-0.660148	0.0212584	0.696961	0.76179	0.118164	0.0123804	0.820598	0.864506	0.0632318	-0.151764	0.00517359	0.0561959	-1.2503	-0.145055	0.00756124	0.0934782	-1.02929	-0.0389823	0.475043	0.713877	-0.146376	-0.0611903	0.261925	0.560815
406	GO_CELLULAR_RESPONSE_TO_EPIDERMAL_GROWTH_FACTOR_STIMULUS	21	0.161329	0.00288031	0.00834516	2.07857	0.0801901	0.140005	0.237451	0.624426	0.16155	0.00284181	0.00936001	2.02872	0.161083	0.00292373	0.0101267	1.99453	-0.100312	0.0646935	0.119971	-0.920925	-0.120263	0.0266464	0.0581993	-1.23508	0.150881	0.00534505	0.0140526	1.85224	0.14289	0.00837058	0.0207624	1.68272	-0.0901168	0.0971171	0.272634	-0.564419	-0.0706612	0.193583	0.368215	-0.433898	-0.0177819	0.74377	0.877704	-0.0566518	-0.026472	0.626511	0.827256
407	GO_CELLULAR_RESPONSE_TO_ESTRADIOL_STIMULUS	19	0.143389	0.00814441	0.020256	1.69345	-0.0725047	0.182192	0.290641	-0.536643	0.0273547	0.615052	0.705145	0.151721	0.0424861	0.434684	0.551344	0.258577	0.0526183	0.333203	0.432237	0.364278	0.0435895	0.42284	0.520472	0.283602	-0.0275336	0.612741	0.69246	-0.159605	-0.0294183	0.588629	0.674677	-0.170904	-0.106041	0.0507826	0.191773	-0.717212	-0.0554532	0.307787	0.477193	-0.321306	-0.107516	0.0476354	0.252787	-0.597245	-0.0942401	0.0827137	0.334565
408	GO_CELLULAR_RESPONSE_TO_ESTROGEN_STIMULUS	28	-0.00805726	0.882264	0.922235	-0.0351585	-0.157965	0.00352866	0.0135459	-1.86819	-0.0869266	0.109578	0.180458	-0.743623	-0.0800954	0.140474	0.232202	-0.634134	0.164168	0.00241951	0.00914543	2.0388	0.16927	0.00175683	0.00692124	2.15982	-0.147026	0.00665369	0.0168241	-1.77407	-0.149308	0.00584834	0.0154124	-1.81213	-0.142199	0.0086932	0.0722531	-1.14114	-0.0794057	0.143932	0.313941	-0.503152	-0.160506	0.00302808	0.0669771	-1.17407	-0.146916	0.00669489	0.112514
409	GO_CELLULAR_RESPONSE_TO_EXTERNAL_STIMULUS	202	-0.246695	4.45926e-06	3.03449e-05	-4.51791	-0.162524	0.00267738	0.011023	-1.9577	-0.11662	0.0316216	0.0667066	-1.17583	-0.127589	0.018647	0.0454631	-1.34234	0.127088	0.0191185	0.04608	1.33649	0.101095	0.0626244	0.115306	0.938148	-0.167025	0.00202476	0.00622894	-2.20559	-0.174855	0.00122513	0.00419747	-2.37701	-0.187952	0.000504496	0.0230404	-1.63751	-0.167067	0.0020194	0.0672628	-1.17223	-0.107185	0.0483281	0.253345	-0.596288	-0.116854	0.0312803	0.215848
410	GO_CELLULAR_RESPONSE_TO_EXTRACELLULAR_STIMULUS	145	-0.112739	0.0377751	0.0744742	-1.12799	-0.0528329	0.331233	0.453309	-0.343605	-0.0176909	0.745036	0.813334	-0.0897312	-0.0346768	0.523776	0.634837	-0.197338	0.0113107	0.835304	0.876871	0.0570642	-0.0201038	0.711716	0.775431	-0.110457	-0.0482325	0.375107	0.475185	-0.323137	-0.0542731	0.318208	0.420543	-0.37619	-0.114073	0.0355544	0.158046	-0.801216	-0.122736	0.0236667	0.14107	-0.850564	-0.00163954	0.975961	0.98856	-0.00499701	-0.0210017	0.699451	0.870977
411	GO_CELLULAR_RESPONSE_TO_FATTY_ACID	37	0.0487616	0.369886	0.481515	0.31739	0.0272253	0.616727	0.716711	0.144656	0.120186	0.0267444	0.0583922	1.23364	0.084968	0.117832	0.202639	0.693278	-0.114499	0.0348696	0.0734184	-1.13419	-0.123053	0.0233061	0.0525425	-1.27949	0.0709668	0.191659	0.276887	0.557697	0.0607458	0.263846	0.35909	0.444797	-0.112445	0.0382811	0.164605	-0.783556	-0.15069	0.00540412	0.08293	-1.08129	0.00776844	0.886456	0.947406	0.0234637	-0.0209495	0.700162	0.870977
412	GO_CELLULAR_RESPONSE_TO_FLUID_SHEAR_STRESS	17	0.0631688	0.245243	0.351026	0.45466	0.17496	0.00121668	0.00607655	2.21634	0.185326	0.000605601	0.00260974	2.5834	0.184029	0.000662157	0.00292167	2.53437	-0.136031	0.0120988	0.0324974	-1.48815	-0.199435	0.000220657	0.00134458	-2.87141	0.218464	5.05766e-05	0.000282897	3.54837	0.205577	0.00013911	0.000678697	3.16832	-0.0234998	0.665747	0.805809	-0.0937679	-0.0111003	0.838324	0.901621	-0.0449759	0.0662992	0.222594	0.505725	0.296085	0.0422495	0.437249	0.705908
413	GO_CELLULAR_RESPONSE_TO_GAMMA_RADIATION	19	0.210036	9.86866e-05	0.000455398	3.34161	0.1794	0.000906492	0.00483826	2.31531	0.158742	0.00336806	0.0107419	1.96892	0.167339	0.00198518	0.00729217	2.13714	-0.0938575	0.0839729	0.146632	-0.833772	-0.11076	0.0412863	0.0834391	-1.07863	0.197807	0.000248818	0.00105885	2.97517	0.19226	0.000371952	0.00154718	2.81046	0.0905772	0.0954158	0.271478	0.566265	0.09719	0.0735085	0.221196	0.655223	0.107204	0.0482877	0.253345	0.596288	0.0958824	0.0774804	0.32783
414	GO_CELLULAR_RESPONSE_TO_GLUCAGON_STIMULUS	23	0.059371	0.274822	0.38285	0.416971	0.100715	0.0636218	0.128461	0.891227	0.191586	0.000390282	0.00181164	2.74193	0.154881	0.00423653	0.0136992	1.86331	-0.179473	0.000902048	0.00424662	-2.37196	-0.177491	0.00102966	0.00450287	-2.34651	0.164361	0.00239087	0.00711321	2.14793	0.146674	0.00678656	0.0174997	1.75697	-0.038746	0.476223	0.671193	-0.173152	-0.0819203	0.131633	0.298992	-0.524341	0.0481112	0.376309	0.647398	0.188829	0.0231001	0.671097	0.853927
415	GO_CELLULAR_RESPONSE_TO_GLUCOSE_STARVATION	29	-0.191738	0.000386074	0.00148593	-2.828	-0.147242	0.00657333	0.0218453	-1.66064	-0.165484	0.00222963	0.00769257	-2.11393	-0.154932	0.00422401	0.0136686	-1.86428	0.192495	0.000365732	0.00210594	2.67655	0.16106	0.00292786	0.010294	1.98742	-0.192706	0.000360247	0.0014414	-2.84122	-0.197562	0.00025332	0.00111774	-2.95166	-0.0934896	0.0851984	0.256089	-0.591609	-0.0674902	0.214382	0.390988	-0.407836	-0.055455	0.307771	0.588247	-0.23044	-0.0647518	0.233596	0.530478
416	GO_CELLULAR_RESPONSE_TO_HEAT	26	-0.0767129	0.158058	0.244056	-0.61251	-0.0451115	0.406815	0.529589	-0.276061	-0.0818226	0.132095	0.210952	-0.675817	-0.075716	0.163545	0.260238	-0.584629	0.0881616	0.104613	0.174158	0.759057	0.075313	0.165803	0.24907	0.603679	-0.078342	0.149392	0.224266	-0.649237	-0.0826867	0.12805	0.19983	-0.699338	-0.0603684	0.266828	0.48691	-0.312551	-0.0512807	0.345651	0.515831	-0.287492	-0.0254947	0.639303	0.817313	-0.0876114	-0.019357	0.721973	0.882058
417	GO_CELLULAR_RESPONSE_TO_HORMONE_STIMULUS	378	-0.0964601	0.0756949	0.133597	-0.874203	-0.0284708	0.600872	0.70401	-0.152421	0.071433	0.18885	0.279148	0.554166	0.0448134	0.410116	0.528485	0.276967	-0.0582544	0.284119	0.383968	-0.415704	-0.0680419	0.210766	0.299961	-0.522935	0.0235826	0.664796	0.736446	0.132859	0.00989927	0.855688	0.890672	0.0502824	-0.182836	0.000705283	0.0254017	-1.59514	-0.182072	0.00074321	0.0558037	-1.25334	-0.0596982	0.272333	0.555193	-0.255556	-0.0864183	0.111703	0.380359
418	GO_CELLULAR_RESPONSE_TO_HYDROGEN_PEROXIDE	55	-0.172363	0.0014408	0.00461852	-2.3355	-0.0910321	0.0937583	0.17335	-0.761076	-0.112146	0.0388009	0.0782376	-1.10658	-0.140125	0.00972884	0.0269031	-1.5702	0.1016	0.0613201	0.115008	0.939273	0.0796955	0.142472	0.220836	0.655929	-0.122654	0.0237608	0.048664	-1.31279	-0.132544	0.0145059	0.0329882	-1.48164	-0.136095	0.012058	0.0862959	-1.06401	-0.124293	0.021942	0.1385	-0.858551	-0.0402833	0.458893	0.706357	-0.150976	-0.0450077	0.407896	0.693283
419	GO_CELLULAR_RESPONSE_TO_INORGANIC_SUBSTANCE	100	-0.0149641	0.783267	0.849841	-0.0706621	-0.0481274	0.376148	0.498903	-0.301984	-0.087489	0.107295	0.177622	-0.750504	-0.0970136	0.0740346	0.139741	-0.854675	0.102902	0.0580588	0.109868	0.959129	0.0721435	0.184384	0.270159	0.568381	-0.0929251	0.0871069	0.144309	-0.840705	-0.0950943	0.079957	0.136234	-0.865713	-0.024707	0.649693	0.794763	-0.0997625	-0.0194113	0.721225	0.823461	-0.0843571	0.0132778	0.80718	0.913361	0.0393575	0.0181812	0.738224	0.889434
420	GO_CELLULAR_RESPONSE_TO_INSULIN_STIMULUS	117	-0.190422	0.000414558	0.00158182	-2.80084	-0.00129042	0.981087	0.98845	-0.00504533	0.0492367	0.36542	0.47039	0.327542	0.0431446	0.427786	0.545135	0.263496	-0.0336206	0.536691	0.627461	-0.202413	-0.0699383	0.198295	0.285648	-0.544169	0.0227016	0.676599	0.744864	0.127923	0.0129266	0.812279	0.857782	0.0666229	-0.138611	0.0105032	0.0798102	-1.09794	-0.143744	0.00794132	0.0958584	-1.01837	-0.0281383	0.605131	0.797802	-0.0981048	-0.0569665	0.294919	0.59494
421	GO_CELLULAR_RESPONSE_TO_INTERFERON_GAMMA	60	-0.245411	5.01185e-06	3.36402e-05	-4.47314	-0.136273	0.0119456	0.0344582	-1.46271	-0.174517	0.00125248	0.00478317	-2.32028	-0.199305	0.000222801	0.00117922	-2.9284	0.128837	0.017517	0.0431132	1.36539	0.138643	0.0105341	0.0281784	1.55008	-0.1948	0.000309813	0.00126495	-2.89793	-0.194459	0.000317551	0.00135942	-2.86665	-0.0493975	0.363671	0.573535	-0.24144	-0.0594537	0.274153	0.44478	-0.351854	-0.0387369	0.476328	0.714014	-0.146293	-0.0487845	0.369661	0.66208
422	GO_CELLULAR_RESPONSE_TO_INTERLEUKIN_1	53	-0.158444	0.00342901	0.00968166	-2.01405	-0.0264366	0.626972	0.725571	-0.13932	0.0261814	0.630304	0.717919	0.143924	0.0269108	0.620804	0.717373	0.144255	0.0628018	0.248	0.345376	0.461708	0.0186957	0.731099	0.792311	0.101105	0.000542545	0.992045	0.99429	0.00248697	-0.0149375	0.783642	0.835709	-0.0779448	-0.166062	0.00215064	0.0386755	-1.41256	-0.112421	0.0383228	0.165505	-0.781189	-0.108179	0.0462755	0.250612	-0.600999	-0.121203	0.0254775	0.201546
423	GO_CELLULAR_RESPONSE_TO_INTERLEUKIN_4	20	0.112625	0.0379705	0.0748263	1.12595	-0.0194614	0.720536	0.800997	-0.0963689	0.105631	0.0516869	0.0985963	1.00614	0.0972432	0.0733507	0.138587	0.858276	-0.0523301	0.335861	0.434921	-0.36159	-0.0266064	0.624761	0.704068	-0.152386	0.0731581	0.178276	0.260906	0.583516	0.0628897	0.247338	0.340916	0.467352	-0.126127	0.0200506	0.112578	-0.948545	-0.0903272	0.0963368	0.254941	-0.59356	-0.0829288	0.126934	0.383543	-0.416186	-0.0918012	0.0910085	0.348612
424	GO_CELLULAR_RESPONSE_TO_INTERLEUKIN_6	16	-0.174453	0.00125774	0.00413951	-2.38305	-0.0575046	0.290214	0.412067	-0.385032	-0.0474783	0.382626	0.487078	-0.312402	-0.0336271	0.536424	0.646805	-0.189227	0.0560726	0.302408	0.401459	0.396359	0.072026	0.185101	0.270716	0.567486	-0.0596378	0.272668	0.368268	-0.433836	-0.0705461	0.194311	0.281123	-0.551103	-0.0505367	0.352702	0.565572	-0.247512	-0.0232989	0.668434	0.784622	-0.105339	-0.0792241	0.144854	0.410821	-0.386347	-0.0852067	0.116801	0.388751
425	GO_CELLULAR_RESPONSE_TO_IONIZING_RADIATION	49	0.168172	0.0018835	0.00584306	2.23336	0.157087	0.00371848	0.0140794	1.85142	0.143531	0.00808092	0.021815	1.66124	0.156236	0.00391106	0.0128531	1.89099	-0.0570741	0.293845	0.393392	-0.405174	-0.0767199	0.15802	0.23949	-0.620713	0.167989	0.00190546	0.00591535	2.22802	0.156314	0.00389299	0.0109777	1.95949	0.0499743	0.358091	0.56899	0.244896	0.0765196	0.159111	0.331387	0.479664	0.0880407	0.105091	0.356476	0.447969	0.0731352	0.178412	0.470769
426	GO_CELLULAR_RESPONSE_TO_KETONE	57	-0.0474805	0.382604	0.493431	-0.306773	0.0333581	0.53969	0.651452	0.186118	0.091945	0.0905016	0.154906	0.809933	0.0539067	0.321489	0.439006	0.35753	-0.090482	0.0957658	0.162857	-0.788193	-0.130383	0.0162007	0.0396296	-1.40198	0.0591359	0.27673	0.372505	0.428868	0.0474792	0.382616	0.486089	0.313285	-0.114057	0.0355816	0.158046	-0.801216	-0.145299	0.00732792	0.0927284	-1.03279	0.0222065	0.683118	0.842211	0.0745792	-0.00177174	0.974023	0.987307
427	GO_CELLULAR_RESPONSE_TO_LIGHT_STIMULUS	69	-0.0640343	0.238825	0.343952	-0.463502	0.0146206	0.788122	0.854056	0.0685135	0.0318157	0.558606	0.651517	0.186074	0.0276777	0.610882	0.709424	0.149094	0.0466897	0.390586	0.491229	0.308716	0.00273715	0.959876	0.97261	0.0120611	0.0170952	0.753338	0.808725	0.0921992	0.0124346	0.819208	0.863381	0.0637976	-0.0668124	0.219028	0.437359	-0.359162	-0.0490519	0.36704	0.534337	-0.272185	-0.04066	0.4547	0.703781	-0.152562	-0.0489991	0.367557	0.661285
428	GO_CELLULAR_RESPONSE_TO_LIPID	302	-0.110501	0.0417648	0.0809707	-1.09167	-0.0907106	0.0949273	0.174938	-0.757116	0.0317158	0.559842	0.652051	0.185719	0.00390284	0.942812	0.960151	0.0176602	0.00517601	0.924205	0.947081	0.023613	0.00906633	0.867647	0.904559	0.043563	-0.03005	0.580646	0.665342	-0.176955	-0.0415876	0.444469	0.546944	-0.262057	-0.199548	0.000218819	0.0159713	-1.79666	-0.176557	0.00109533	0.059846	-1.22296	-0.134157	0.013345	0.145253	-0.837873	-0.152193	0.0049557	0.096176
429	GO_CELLULAR_RESPONSE_TO_MECHANICAL_STIMULUS	60	-0.295483	3.27411e-08	4.06283e-07	-6.39117	-0.230235	1.90419e-05	0.000292902	-3.53328	-0.186767	0.000548008	0.00238475	-2.62256	-0.190053	0.000435143	0.00203342	-2.69177	0.222124	3.75298e-05	0.000358312	3.44574	0.199137	0.00022559	0.00136899	2.8636	-0.251294	2.91869e-06	2.61208e-05	-4.58301	-0.259479	1.34579e-06	1.62007e-05	-4.79047	-0.193002	0.000352699	0.0195071	-1.70981	-0.153041	0.00471773	0.0804187	-1.09464	-0.180621	0.000835023	0.04065	-1.39094	-0.175592	0.00116731	0.0460345
430	GO_CELLULAR_RESPONSE_TO_NITROGEN_COMPOUND	345	-0.0331635	0.542245	0.646434	-0.189476	0.0808724	0.136709	0.23302	0.632606	0.116929	0.0311203	0.0659533	1.18076	0.0998681	0.0658716	0.127428	0.894734	-0.114373	0.0350233	0.0736719	-1.1327	-0.152754	0.00475977	0.0150398	-1.82276	0.111527	0.039851	0.0753157	1.12311	0.101023	0.0627905	0.110601	0.95624	-0.0868132	0.11007	0.292156	-0.534385	-0.0987549	0.0689582	0.215336	-0.666884	0.0364405	0.503063	0.731879	0.135561	0.00706305	0.896758	0.959814
431	GO_CELLULAR_RESPONSE_TO_NUTRIENT	29	0.0862008	0.112582	0.185061	0.732686	0.153224	0.00466771	0.0169076	1.77192	0.137904	0.0109578	0.0279143	1.55417	0.115696	0.0330039	0.0724874	1.13974	-0.150591	0.00543478	0.017039	-1.76856	-0.203151	0.000167192	0.00108284	-2.96544	0.151952	0.00502532	0.0133546	1.87437	0.149691	0.00572202	0.0151186	1.82049	-0.0145376	0.789298	0.884317	-0.0533922	-0.0522217	0.336864	0.507242	-0.294784	0.124956	0.0212409	0.180609	0.743261	0.0973812	0.0729421	0.319499
432	GO_CELLULAR_RESPONSE_TO_ORGANIC_CYCLIC_COMPOUND	318	-0.0125224	0.818046	0.874292	-0.0583433	0.00364226	0.946651	0.96517	0.0153961	0.062618	0.249528	0.34926	0.456851	0.0394426	0.46852	0.583018	0.234318	-0.0408275	0.453036	0.550302	-0.259399	-0.0579124	0.286961	0.384292	-0.415339	0.0380928	0.483887	0.581557	0.235407	0.0283963	0.601824	0.686603	0.163294	-0.12002	0.0269033	0.134359	-0.871735	-0.109811	0.0430243	0.173085	-0.761742	-0.0257625	0.635952	0.815181	-0.0887458	-0.0441043	0.417571	0.699107
433	GO_CELLULAR_RESPONSE_TO_OXIDATIVE_STRESS	154	-0.166104	0.00211994	0.0064634	-2.18954	-0.134169	0.0132849	0.0375571	-1.42531	-0.0638391	0.240396	0.33959	-0.469045	-0.0868531	0.109906	0.192511	-0.715545	0.0594162	0.274609	0.3735	0.427709	0.0548265	0.313461	0.411813	0.3853	-0.113691	0.0361323	0.0695334	-1.15781	-0.121513	0.0250492	0.0514455	-1.28865	-0.191089	0.000395238	0.0198966	-1.70122	-0.182156	0.000738959	0.0558037	-1.25334	-0.104678	0.053811	0.266433	-0.574412	-0.115069	0.0339213	0.222624
434	GO_CELLULAR_RESPONSE_TO_OXYGEN_CONTAINING_COMPOUND	545	-0.0622691	0.252885	0.35964	-0.444132	0.0236265	0.664678	0.756558	0.121158	0.0747928	0.169466	0.256486	0.590936	0.0628849	0.248213	0.361349	0.442073	-0.0756456	0.164641	0.249439	-0.603035	-0.0923529	0.0895555	0.15253	-0.816644	0.0565505	0.299182	0.396226	0.402057	0.0455151	0.403515	0.506825	0.295142	-0.112624	0.0382127	0.164605	-0.783556	-0.107755	0.0474324	0.181319	-0.741557	-0.0137926	0.80025	0.909031	-0.0414215	-0.0374826	0.491566	0.743954
435	GO_CELLULAR_RESPONSE_TO_OXYGEN_LEVELS	119	-0.0823001	0.129847	0.207812	-0.682329	0.0204289	0.707266	0.791042	0.101801	0.137107	0.011431	0.0288547	1.53978	0.116226	0.0322043	0.0709424	1.14909	-0.0336836	0.53574	0.627035	-0.202708	-0.0721383	0.184415	0.270159	-0.568381	0.0946376	0.0814215	0.136426	0.865103	0.0772383	0.155223	0.232703	0.633199	-0.158775	0.00336146	0.0481918	-1.31703	-0.131794	0.0150756	0.123447	-0.90852	-0.0755896	0.16425	0.437516	-0.359007	-0.0931147	0.0864621	0.341584
436	GO_CELLULAR_RESPONSE_TO_PEPTIDE	195	-0.143688	0.00796626	0.0199044	-1.70105	-0.0088059	0.871481	0.913934	-0.0390853	0.0513888	0.344813	0.449668	0.347108	0.0359603	0.50871	0.621507	0.206554	-0.0422883	0.437021	0.534512	-0.272042	-0.0764512	0.159558	0.241326	-0.617396	0.0215421	0.692252	0.757579	0.120572	0.0100345	0.853739	0.889479	0.0508645	-0.150379	0.00546177	0.057978	-1.23674	-0.152898	0.00471983	0.0804187	-1.09464	-0.0338198	0.534279	0.75546	-0.121788	-0.0593026	0.275529	0.57684
437	GO_CELLULAR_RESPONSE_TO_PROSTAGLANDIN_E_STIMULUS	16	0.118307	0.0292276	0.0604474	1.21862	0.117854	0.0298542	0.0711044	1.1481	0.20674	0.000127278	0.000723804	3.14038	0.185894	0.000582266	0.00262672	2.58059	-0.205797	0.000136795	0.000978999	-3.00922	-0.222567	3.61887e-05	0.000326378	-3.48628	0.177111	0.00105591	0.00364022	2.43887	0.165806	0.00218537	0.00677479	2.1691	-0.0832029	0.12568	0.315624	-0.50083	-0.126582	0.0196048	0.133882	-0.873277	0.0600704	0.2692	0.552754	0.257468	0.0343476	0.527726	0.767758
438	GO_CELLULAR_RESPONSE_TO_PROSTAGLANDIN_STIMULUS	20	0.0794769	0.143573	0.225222	0.647389	0.100405	0.0644462	0.129712	0.887019	0.146681	0.00678377	0.0191171	1.71858	0.121714	0.0248608	0.0575711	1.2398	-0.181321	0.000796414	0.00382244	-2.41766	-0.202907	0.000170292	0.00109491	-2.96062	0.118942	0.0283664	0.0564392	1.24842	0.110543	0.0416882	0.0791255	1.10168	-0.0338262	0.534014	0.711056	-0.148096	-0.104388	0.0545119	0.192881	-0.71471	0.103018	0.0577746	0.274321	0.561741	0.0726964	0.181036	0.473645
439	GO_CELLULAR_RESPONSE_TO_RADIATION	112	0.113358	0.0367311	0.0728374	1.13765	0.133862	0.013551	0.0381736	1.41824	0.146904	0.00669936	0.0189377	1.72267	0.147497	0.00647989	0.0194363	1.71139	-0.0481146	0.376276	0.478033	-0.320542	-0.0817463	0.132457	0.208472	-0.680953	0.152634	0.00483069	0.0128993	1.88943	0.142701	0.00845771	0.0209551	1.67871	-0.0168793	0.756353	0.864221	-0.0633752	0.013145	0.809072	0.88237	0.0543492	0.0250184	0.645577	0.821104	0.0856016	0.00858729	0.874581	0.950999
440	GO_CELLULAR_RESPONSE_TO_REACTIVE_NITROGEN_SPECIES	15	0.0730802	0.178739	0.271115	0.566847	0.0855163	0.115474	0.204048	0.690267	0.118654	0.0287546	0.0618663	1.20855	0.0602805	0.267527	0.381556	0.418441	-0.107552	0.0475606	0.0941436	-1.02621	-0.102789	0.0583368	0.108905	-0.962952	0.0964661	0.0756862	0.128414	0.891386	0.0886577	0.102669	0.16746	0.776088	-0.0365987	0.501018	0.688007	-0.162407	-0.070158	0.196781	0.371333	-0.430237	0.0501416	0.356482	0.62742	0.202441	0.033559	0.53725	0.776286
441	GO_CELLULAR_RESPONSE_TO_REACTIVE_OXYGEN_SPECIES	89	-0.0135236	0.803683	0.863945	-0.0635141	0.00901962	0.868323	0.911749	0.0401246	-0.0224886	0.679314	0.758599	-0.119988	-0.0298565	0.583087	0.686623	-0.163282	0.030595	0.5738	0.66179	0.17928	0.0331734	0.541939	0.631288	0.199773	-0.0160272	0.768294	0.819933	-0.0862217	-0.0249439	0.646561	0.72527	-0.1395	-0.080899	0.136526	0.33323	-0.477256	-0.0655817	0.227649	0.403213	-0.394465	0.00982748	0.856651	0.93827	0.0276721	-0.00290629	0.957399	0.97994
442	GO_CELLULAR_RESPONSE_TO_RETINOIC_ACID	40	-0.0260794	0.631637	0.723598	-0.140503	0.0425649	0.433832	0.554625	0.256001	0.0596644	0.272454	0.37472	0.426293	0.00352547	0.948334	0.964223	0.0158225	-0.132417	0.0146014	0.0373466	-1.42775	-0.111675	0.0396308	0.0809054	-1.09202	0.0519677	0.339222	0.439659	0.356884	0.0533263	0.326732	0.429248	0.367292	-0.0328843	0.545467	0.719335	-0.143069	-0.0797877	0.142009	0.312131	-0.505663	0.0512697	0.345755	0.619939	0.207651	0.0268625	0.62143	0.824316
443	GO_CELLULAR_RESPONSE_TO_STARVATION	92	-0.205371	0.000141311	0.000616756	-3.20989	-0.156134	0.00393488	0.0147246	-1.83196	-0.0937259	0.0844096	0.146584	-0.833915	-0.10527	0.0524951	0.105899	-0.97511	0.108523	0.0455818	0.0907539	1.04213	0.0858946	0.113869	0.184844	0.733196	-0.149469	0.005795	0.0150315	-1.823	-0.156845	0.0037724	0.0106921	-1.97094	-0.151423	0.00518087	0.0561959	-1.2503	-0.141806	0.00888164	0.099185	-1.00355	-0.0856494	0.114907	0.368917	-0.433072	-0.0963089	0.0761662	0.326652
444	GO_CELLULAR_RESPONSE_TO_STEROID_HORMONE_STIMULUS	151	-0.123068	0.0232356	0.0498952	-1.30194	-0.117036	0.0309653	0.0732389	-1.13526	0.0100195	0.853954	0.897726	0.0468561	-0.0264922	0.626415	0.722285	-0.141291	0.03065	0.573293	0.661437	0.179511	0.0283839	0.601983	0.684668	0.16452	-0.0574954	0.290451	0.387442	-0.411793	-0.0696882	0.199908	0.287322	-0.541631	-0.227884	2.2109e-05	0.00612142	-2.21315	-0.207904	0.000112588	0.0332509	-1.4782	-0.138051	0.0108227	0.128158	-0.892254	-0.157005	0.00370323	0.0810873
445	GO_CELLULAR_RESPONSE_TO_TOPOLOGICALLY_INCORRECT_PROTEIN	112	-0.0745948	0.169968	0.259819	-0.585329	-0.0514601	0.344143	0.467368	-0.330341	-0.0693824	0.201894	0.294014	-0.531633	-0.0507248	0.351091	0.469606	-0.328267	0.108071	0.0464567	0.092247	1.03505	0.089795	0.0983348	0.164635	0.783479	-0.0688168	0.205604	0.293153	-0.532906	-0.0783071	0.149639	0.226092	-0.645715	-0.0371471	0.494814	0.684276	-0.164769	-0.0300166	0.581246	0.718855	-0.143359	-0.010137	0.852262	0.935693	-0.0288668	-0.00900882	0.868546	0.947927
446	GO_CELLULAR_RESPONSE_TO_TOXIC_SUBSTANCE	18	-0.129513	0.0169308	0.0381116	-1.41894	-0.0108973	0.841242	0.890916	-0.0501631	0.115307	0.0336011	0.0698513	1.15583	0.0754864	0.164828	0.261717	0.582169	-0.0911424	0.0933602	0.159809	-0.796399	-0.0529587	0.330082	0.428942	-0.367602	0.0768228	0.157462	0.234473	0.629908	0.065066	0.231331	0.323484	0.490147	-0.0982852	0.0703111	0.231193	-0.636025	-0.0861627	0.112742	0.276701	-0.557989	-0.0539821	0.320812	0.598171	-0.223175	-0.0820256	0.131136	0.409041
447	GO_CELLULAR_RESPONSE_TO_UV	63	-0.0929691	0.086957	0.149833	-0.824394	-0.0143245	0.792315	0.856714	-0.0671642	3.51112e-05	0.999487	0.999713	0.000124674	-0.0107908	0.842774	0.891686	-0.049788	0.0768258	0.157445	0.240927	0.618115	0.0382499	0.481892	0.576034	0.239552	-0.0226645	0.676947	0.745062	-0.127807	-0.0285799	0.599301	0.684254	-0.164783	-0.0793792	0.144067	0.345355	-0.461734	-0.0570109	0.294381	0.46393	-0.333548	-0.0489188	0.368343	0.639932	-0.193866	-0.0605748	0.265194	0.564813
448	GO_CELLULAR_RESPONSE_TO_VASCULAR_ENDOTHELIAL_GROWTH_FACTOR_STIMULUS	23	-0.108268	0.0460944	0.0882447	-1.05431	0.0444291	0.413955	0.535925	0.270896	0.138316	0.0107196	0.0274497	1.56146	0.0788611	0.146709	0.240231	0.61937	-0.102272	0.0596175	0.112338	-0.949475	-0.104733	0.0537149	0.101822	-0.99216	0.101667	0.061149	0.107368	0.969124	0.0847326	0.118856	0.188046	0.725737	-0.163011	0.00259851	0.0436037	-1.36048	-0.171991	0.00147582	0.0617074	-1.20966	-0.0078695	0.884989	0.9474	-0.0234664	-0.0403507	0.45814	0.723219
449	GO_CELLULAR_RESPONSE_TO_VIRUS	20	-0.269687	4.9425e-07	4.26809e-06	-5.36977	-0.150273	0.00553485	0.0191988	-1.71673	-0.148303	0.00619159	0.0178225	-1.74903	-0.192697	0.000360491	0.00175492	-2.75574	0.140989	0.00928467	0.0263492	1.57923	0.144757	0.0075519	0.0216677	1.66419	-0.175175	0.00119965	0.00402307	-2.39544	-0.180772	0.000826549	0.00301864	-2.52019	-0.0719881	0.185333	0.399137	-0.398878	-0.0720831	0.184753	0.358656	-0.445321	-0.0639727	0.239279	0.521143	-0.283043	-0.0690592	0.203898	0.499982
450	GO_CELLULAR_RESPONSE_TO_VITAMIN	18	0.1697	0.00170937	0.00536676	2.27029	0.183346	0.0006939	0.00395112	2.40328	0.140773	0.00939418	0.0246834	1.60759	0.116196	0.0322494	0.07098	1.14886	-0.156206	0.00391806	0.01328	-1.8768	-0.206188	0.000132776	0.000910523	-3.04071	0.162112	0.00274584	0.00802378	2.09562	0.16291	0.0026147	0.00786896	2.10408	0.0545061	0.316132	0.53222	0.273909	0.00819802	0.880223	0.928868	0.0320461	0.17885	0.000940527	0.0424521	1.3721	0.159725	0.00317457	0.0776388
451	GO_CELLULAR_SENESCENCE	29	0.0016313	0.976081	0.984526	0.00677259	0.0538451	0.322044	0.444063	0.352555	0.0597337	0.271897	0.374302	0.426778	0.0809042	0.136501	0.227075	0.643831	-0.0235138	0.66556	0.740625	-0.130401	-0.0688342	0.205378	0.293587	-0.532263	0.0659105	0.225322	0.31548	0.501029	0.0673467	0.215359	0.305202	0.515413	-0.0252364	0.642703	0.789776	-0.102496	0.00672609	0.901608	0.942979	0.0254981	-0.0279769	0.60703	0.799213	-0.0973373	-0.0386446	0.477379	0.733195
452	GO_CELLULAR_TRANSITION_METAL_ION_HOMEOSTASIS	52	-0.223022	3.48562e-05	0.00018604	-3.73039	-0.257921	1.56255e-06	5.16575e-05	-4.28687	-0.215657	6.3366e-05	0.000408011	-3.38933	-0.195931	0.000285388	0.0014383	-2.84215	0.22313	3.45459e-05	0.000334876	3.47512	0.19775	0.000249852	0.00148371	2.82865	-0.269743	4.91493e-07	6.49945e-06	-5.18712	-0.264908	7.93958e-07	1.08338e-05	-4.96522	-0.126187	0.019992	0.112392	-0.949266	-0.0881228	0.104766	0.266682	-0.574007	-0.182494	0.00073546	0.0398158	-1.39994	-0.164617	0.00235317	0.066039
453	GO_CENTRAL_NERVOUS_SYSTEM_DEVELOPMENT	571	0.153219	0.00469346	0.0127345	1.89502	0.183501	0.000686277	0.00392042	2.40667	0.287777	6.91061e-08	1.97763e-06	5.70385	0.263556	8.56904e-07	1.74935e-05	4.75712	-0.288096	6.67445e-08	2.1741e-06	-5.66272	-0.302917	1.2634e-08	5.71109e-07	-6.24328	0.274874	2.72339e-07	4.0917e-06	5.3881	0.265537	7.03747e-07	9.80377e-06	5.00861	-0.0649555	0.232948	0.452815	-0.344079	-0.0890406	0.101712	0.262799	-0.580377	0.0771869	0.156183	0.425735	0.370861	0.0438613	0.420833	0.699402
454	GO_CENTRAL_NERVOUS_SYSTEM_NEURON_AXONOGENESIS	21	0.20443	0.000151782	0.000655994	3.1831	0.208416	0.000111887	0.000983453	3.00725	0.318486	2.31247e-09	1.55216e-07	6.80906	0.302599	1.47673e-08	8.8404e-07	6.05353	-0.311987	5.0019e-09	3.25859e-07	-6.48697	-0.29243	4.57793e-08	1.56002e-06	-5.80687	0.312412	4.75813e-09	1.78631e-07	6.74804	0.305057	1.11616e-08	3.98556e-07	6.39951	-0.0362272	0.505377	0.690891	-0.16059	-0.0524812	0.334466	0.505349	-0.296409	0.0541485	0.319321	0.596874	0.224117	0.0297047	0.585004	0.808854
455	GO_CENTRAL_NERVOUS_SYSTEM_NEURON_DEVELOPMENT	47	0.149353	0.00583322	0.0152997	1.81532	0.209535	0.000102605	0.000925792	3.03349	0.289814	6.08276e-08	1.79644e-06	5.74559	0.277203	2.30339e-07	6.60606e-06	5.18006	-0.331891	4.44308e-10	5.81028e-08	-7.2358	-0.315353	3.36179e-09	2.01076e-07	-6.69664	0.284136	1.11659e-07	1.97071e-06	5.70538	0.281783	1.43074e-07	2.73198e-06	5.56352	0.000519341	0.992386	0.995983	0.00174808	-0.0445525	0.412659	0.576048	-0.239542	0.108349	0.0459318	0.249666	0.60264	0.0801864	0.140023	0.420829
456	GO_CENTRAL_NERVOUS_SYSTEM_NEURON_DIFFERENTIATION	90	0.0885139	0.103229	0.172189	0.763995	0.146369	0.0069035	0.0227358	1.64329	0.229737	1.98657e-05	0.00016924	3.7715	0.204798	0.000147604	0.000856289	3.06738	-0.285325	9.84204e-08	2.90668e-06	-5.5366	-0.259585	1.33211e-06	2.30517e-05	-4.6373	0.212129	8.37898e-05	0.000425675	3.37092	0.213157	7.72751e-05	0.00041952	3.37725	-0.0355078	0.513871	0.696339	-0.157179	-0.0686373	0.20668	0.381599	-0.418393	0.0621576	0.252892	0.539048	0.268372	0.029738	0.584583	0.808854
457	GO_CENTRAL_NERVOUS_SYSTEM_PROJECTION_NEURON_AXONOGENESIS	17	0.175202	0.00119754	0.00396792	2.40144	0.167703	0.00194007	0.00856126	2.06746	0.288609	6.92718e-08	1.97763e-06	5.70385	0.264589	8.19249e-07	1.70839e-05	4.76741	-0.280424	1.64922e-07	4.4279e-06	-5.3538	-0.264878	7.96295e-07	1.50752e-05	-4.82174	0.27215	3.85798e-07	5.35763e-06	5.27103	0.264567	8.21018e-07	1.10215e-05	4.95776	-0.0731248	0.178474	0.389286	-0.409732	-0.0848577	0.118311	0.28346	-0.547509	0.0370387	0.495883	0.725613	0.139295	0.0125234	0.817939	0.922522
458	GO_CENTRIOLAR_SATELLITE	21	0.290677	5.53997e-08	6.50983e-07	6.18643	0.27007	4.75651e-07	2.59092e-05	4.58655	0.219586	4.61794e-05	0.000322165	3.49192	0.232319	1.59336e-05	0.000146444	3.83433	-0.216101	6.11578e-05	0.000520017	-3.28398	-0.193907	0.000330452	0.00183246	-2.73697	0.274548	3.02398e-07	4.46541e-06	5.35014	0.274186	3.1378e-07	5.03639e-06	5.29788	0.148588	0.00609249	0.0616204	1.21028	0.124403	0.0218244	0.138315	0.85913	0.166448	0.0020994	0.0602276	1.2202	0.157661	0.00359342	0.0801183
459	GO_CENTRIOLE	87	0.306194	9.79812e-09	1.45169e-07	6.83812	0.249913	3.31766e-06	8.55576e-05	4.06774	0.272855	3.59218e-07	7.0546e-06	5.15153	0.262889	9.67399e-07	1.9132e-05	4.71824	-0.220155	4.40914e-05	0.000406926	-3.39048	-0.195724	0.000289731	0.00165887	-2.78019	0.304047	1.25262e-08	3.54197e-07	6.45075	0.300063	1.96599e-08	5.80623e-07	6.23611	0.0746199	0.169741	0.378246	0.422226	0.0596015	0.272961	0.443424	0.353181	0.0882583	0.104231	0.354944	0.449841	0.0807848	0.137082	0.416967
460	GO_CENTRIOLE_ASSEMBLY	17	0.298731	2.28234e-08	3.00915e-07	6.52156	0.24864	3.73104e-06	9.3912e-05	4.02728	0.245804	4.83606e-06	5.34257e-05	4.27225	0.244589	5.39978e-06	6.90843e-05	4.16062	-0.169468	0.00173479	0.00710269	-2.14858	-0.161756	0.00280619	0.0100011	-1.99995	0.29006	5.92298e-08	1.18728e-06	5.92545	0.285292	9.87724e-08	2.02575e-06	5.69341	0.0902288	0.0967008	0.272501	0.564632	0.11122	0.0404476	0.169841	0.769956	0.0859883	0.113474	0.368	0.434152	0.0859505	0.113633	0.382704
461	GO_CENTROMERE_COMPLEX_ASSEMBLY	47	0.400257	1.40942e-14	6.24372e-12	11.2046	0.220957	4.12992e-05	0.000501248	3.29995	0.216563	5.89386e-05	0.000386812	3.4125	0.238531	9.27795e-06	9.80335e-05	4.00863	-0.14281	0.00840736	0.0244227	-1.61221	-0.156975	0.00374335	0.0124767	-1.9039	0.25578	1.91556e-06	1.89842e-05	4.72161	0.251938	2.74871e-06	2.76117e-05	4.55891	0.096137	0.0766936	0.241645	0.616822	0.122383	0.0240728	0.141812	0.848288	0.107039	0.0486357	0.253776	0.595549	0.117895	0.0297967	0.212689
462	GO_CENTROSOME	435	0.341028	1.04874e-10	2.59548e-09	8.58578	0.223064	3.31956e-05	0.000433615	3.3629	0.249515	3.19676e-06	3.72675e-05	4.42867	0.257106	1.5526e-06	2.79593e-05	4.55347	-0.176727	0.00106609	0.00484835	-2.31441	-0.152544	0.00481842	0.0152143	-1.81775	0.274498	2.719e-07	4.0917e-06	5.3881	0.270443	4.12682e-07	6.36047e-06	5.19651	0.0639573	0.239524	0.459276	0.337926	0.0757868	0.163227	0.334794	0.475222	0.0689971	0.204416	0.481682	0.31724	0.0665507	0.220962	0.515704
463	GO_CENTROSOME_CYCLE	44	0.275057	2.87091e-07	2.67188e-06	5.57318	0.252863	2.52129e-06	7.15983e-05	4.1451	0.248444	3.79902e-06	4.33754e-05	4.36276	0.255056	2.05132e-06	3.40351e-05	4.46807	-0.178502	0.000962612	0.00447938	-2.34878	-0.181072	0.000809988	0.00372225	-2.42919	0.300119	1.95356e-08	5.09075e-07	6.29322	0.294302	3.72884e-08	9.54842e-07	6.02007	0.0694857	0.201114	0.418082	0.378738	0.0832619	0.125411	0.291381	0.535538	0.0865599	0.111088	0.363725	0.439227	0.0744233	0.170871	0.462688
464	GO_CENTROSOME_DUPLICATION	31	0.280124	1.70171e-07	1.67524e-06	5.77592	0.266839	6.56291e-07	3.08171e-05	4.51121	0.300449	1.88255e-08	7.18938e-07	6.14331	0.284847	1.03554e-07	3.69955e-06	5.43185	-0.234446	1.3262e-05	0.000149875	-3.82427	-0.227232	2.45501e-05	0.000239026	-3.62155	0.33888	1.81998e-10	1.46591e-08	7.83389	0.331578	4.62178e-10	3.65616e-08	7.43697	0.0478725	0.378684	0.589035	0.229859	0.0504784	0.353258	0.52266	0.281781	0.0850419	0.117512	0.372301	0.429106	0.0661096	0.223922	0.517569
465	GO_CENTROSOME_LOCALIZATION	16	0.359901	1.07039e-11	3.98472e-10	9.3996	0.292303	4.64152e-08	5.01511e-06	5.29972	0.282014	1.39637e-07	3.38029e-06	5.47105	0.276072	2.58741e-07	7.25456e-06	5.13939	-0.250114	3.25646e-06	4.6838e-05	-4.3294	-0.268034	5.82903e-07	1.20666e-05	-4.91841	0.324822	1.07107e-09	5.45383e-08	7.2633	0.322805	1.37102e-09	8.56682e-08	7.06718	0.076156	0.161106	0.36753	0.434707	0.0639681	0.239312	0.414114	0.38288	0.150577	0.00543935	0.0905876	1.04293	0.139367	0.0101338	0.13894
466	GO_CERAMIDE_BIOSYNTHETIC_PROCESS	29	0.0865242	0.111236	0.18312	0.737265	0.0903919	0.0960977	0.176425	0.753441	0.228886	2.13527e-05	0.000178476	3.74842	0.230531	1.85685e-05	0.00016556	3.78104	-0.218474	5.05342e-05	0.000445062	-3.35158	-0.213344	7.61398e-05	0.000589684	-3.22938	0.198582	0.000235026	0.00101371	2.99409	0.189185	0.000462658	0.00185534	2.73158	-0.126438	0.019745	0.112137	-0.95025	-0.146587	0.00681962	0.0909176	-1.04135	-0.0498851	0.35895	0.630618	-0.200234	-0.0766042	0.15865	0.448798
467	GO_CERAMIDE_METABOLIC_PROCESS	55	-0.066631	0.220284	0.319953	-0.494914	-0.0591688	0.276462	0.397768	-0.400371	0.117481	0.0303791	0.0647328	1.18888	0.0877402	0.106286	0.187365	0.727311	-0.100247	0.0648695	0.120139	-0.920317	-0.0922256	0.089519	0.15253	-0.816644	0.0471837	0.385588	0.485547	0.313769	0.0365395	0.501712	0.598272	0.223101	-0.183515	0.000685928	0.0251129	-1.6001	-0.197234	0.000259489	0.0436244	-1.36027	-0.123024	0.0233389	0.189015	-0.723504	-0.141175	0.00919151	0.132633
468	GO_CEREBELLAR_CORTEX_DEVELOPMENT	31	0.226191	2.67895e-05	0.000147425	3.83143	0.120601	0.0262206	0.0642462	1.19215	0.120369	0.026512	0.0579705	1.23679	0.152448	0.00488306	0.0153745	1.8132	-0.170988	0.00157418	0.00659104	-2.18105	-0.14283	0.00839822	0.0233841	-1.63108	0.147597	0.00644332	0.0163951	1.78529	0.15191	0.00503757	0.0136242	1.86569	0.0601593	0.268491	0.488266	0.311344	0.0597749	0.271566	0.44213	0.35445	0.10809	0.0464552	0.250971	0.600376	0.0973659	0.0729872	0.319499
469	GO_CEREBELLAR_CORTEX_MORPHOGENESIS	20	0.162027	0.00276013	0.00804962	2.09422	0.0833806	0.124872	0.217788	0.661966	0.083558	0.124069	0.200228	0.698475	0.106591	0.0495892	0.100984	0.995746	-0.143391	0.00814373	0.0238287	-1.6229	-0.126789	0.019404	0.0453852	-1.34309	0.0975802	0.0723559	0.123426	0.908594	0.104811	0.0535365	0.0970006	1.01323	0.0499273	0.358544	0.569301	0.244658	0.0534478	0.32563	0.496743	0.303868	0.082905	0.127044	0.383543	0.416186	0.0714566	0.188606	0.483071
470	GO_CEREBELLAR_PURKINJE_CELL_LAYER_DEVELOPMENT	18	0.172886	0.00139278	0.00449056	2.3477	0.0951844	0.0796707	0.152921	0.815533	0.0445678	0.412498	0.515042	0.288158	0.0731828	0.178129	0.277954	0.556027	-0.130585	0.0160349	0.0402463	-1.39527	-0.0986998	0.0691307	0.124117	-0.906168	0.0808071	0.136973	0.208951	0.679956	0.0908154	0.0945452	0.156691	0.804956	0.0819701	0.131398	0.325554	0.487377	0.0598799	0.270723	0.441428	0.35514	0.124414	0.0218124	0.182663	0.738349	0.11643	0.0319023	0.216815
471	GO_CEREBRAL_CORTEX_CELL_MIGRATION	30	0.143133	0.00825971	0.0204874	1.68851	0.202875	0.000170695	0.00135516	2.86801	0.335042	2.97978e-10	3.61002e-08	7.44249	0.314813	3.58449e-09	3.25408e-07	6.48757	-0.319451	2.05905e-09	1.65847e-07	-6.78029	-0.308552	7.46503e-09	3.75796e-07	-6.42505	0.314972	3.51753e-09	1.41794e-07	6.84834	0.301906	1.59721e-08	4.81336e-07	6.31755	-0.0573009	0.291928	0.509953	-0.292469	-0.0994942	0.0669142	0.212647	-0.67234	0.0790033	0.14598	0.41243	0.38465	0.043341	0.425491	0.700195
472	GO_CEREBRAL_CORTEX_DEVELOPMENT	79	0.205766	0.000137123	0.000600846	3.22124	0.245389	5.022e-06	0.000115272	3.93828	0.330105	5.56132e-10	6.00894e-08	7.2212	0.316551	2.91531e-09	3.00344e-07	6.52238	-0.313591	4.14168e-09	2.86682e-07	-6.5426	-0.303349	1.35614e-08	6.06837e-07	-6.21693	0.333439	3.65362e-10	2.45264e-08	7.61037	0.321327	1.64123e-09	9.80614e-08	7.0085	0.00320917	0.952964	0.977473	0.00989506	-0.0376582	0.4887	0.64452	-0.190764	0.108604	0.0454214	0.248109	0.605357	0.0799837	0.14103	0.423282
473	GO_CEREBRAL_CORTEX_RADIALLY_ORIENTED_CELL_MIGRATION	19	0.032026	0.556008	0.658939	0.181155	0.0670603	0.21732	0.331062	0.48009	0.216704	5.82744e-05	0.00038416	3.41549	0.176944	0.00106766	0.00436724	2.35979	-0.229116	2.09415e-05	0.00022194	-3.65376	-0.204088	0.000155761	0.00103669	-2.98435	0.165028	0.00229388	0.00689409	2.16152	0.158237	0.00347168	0.0100258	1.99888	-0.121051	0.0256635	0.131057	-0.882539	-0.176157	0.00112465	0.059846	-1.22296	-0.00691844	0.898809	0.953706	-0.0205854	-0.0344786	0.526152	0.767505
474	GO_CHANNEL_INHIBITOR_ACTIVITY	27	0.0485008	0.372453	0.483436	0.315661	0.0997141	0.0663113	0.132397	0.878122	0.235791	1.17985e-05	0.000111733	3.95182	0.231034	1.7788e-05	0.000160593	3.79427	-0.187472	0.000521725	0.00276134	-2.55888	-0.18989	0.000440208	0.00229696	-2.63885	0.19518	0.000301396	0.00123857	2.90708	0.184331	0.00064859	0.00247481	2.60646	-0.071096	0.190851	0.406491	-0.390949	-0.0623646	0.251313	0.423391	-0.373258	0.00385857	0.94346	0.974005	0.011439	-0.0320956	0.555149	0.790267
475	GO_CHANNEL_REGULATOR_ACTIVITY	70	0.0181754	0.738304	0.814296	0.089218	0.0375312	0.490168	0.610049	0.214635	0.188282	0.000492975	0.00217301	2.66294	0.17052	0.00162219	0.00621652	2.20645	-0.201821	0.000184751	0.00124007	-2.90655	-0.19891	0.000229393	0.00138448	-2.85871	0.129081	0.017303	0.0375955	1.42486	0.122401	0.0240529	0.0497686	1.30304	-0.0794659	0.143628	0.345195	-0.461936	-0.10481	0.05354	0.191766	-0.717229	0.0176988	0.744925	0.878591	0.0562133	-0.0088978	0.870085	0.948274
476	GO_CHAPERONE_BINDING	69	0.102933	0.0579558	0.107131	0.970086	-0.0359976	0.50827	0.625281	-0.203925	-0.0804189	0.13893	0.218916	-0.659723	-0.0400925	0.461218	0.576325	-0.239333	0.105256	0.0524939	0.101905	0.991803	0.0749669	0.167842	0.251783	0.598973	-0.0713501	0.189365	0.274146	-0.562017	-0.0670531	0.217489	0.307623	-0.511981	-0.00761945	0.888675	0.944311	-0.024885	0.00395078	0.94214	0.965906	0.0150652	0.0130339	0.81075	0.915043	0.0385587	0.0371722	0.494523	0.746672
477	GO_CHAPERONE_MEDIATED_PROTEIN_FOLDING	41	0.0159484	0.7694	0.838279	0.0766113	-0.190566	0.000419619	0.00270584	-2.5677	-0.224775	3.01459e-05	0.000233472	-3.63176	-0.177685	0.00101649	0.00419277	-2.3775	0.233098	1.49011e-05	0.000165029	3.78244	0.223349	3.39279e-05	0.000309898	3.50878	-0.243016	6.22284e-06	4.81102e-05	-4.31776	-0.236098	1.14862e-05	8.52325e-05	-4.06939	-0.0419039	0.44101	0.643259	-0.191614	-0.014722	0.786689	0.868219	-0.0613707	-0.0850391	0.117524	0.372301	-0.429106	-0.0547873	0.313639	0.613408
478	GO_CHD_TYPE_COMPLEX	16	0.192867	0.000356115	0.00139117	2.85662	0.16278	0.00263562	0.0108916	1.96291	0.118262	0.0292888	0.0627113	1.20265	0.1425	0.0085515	0.024412	1.6124	-0.104302	0.0547123	0.105152	-0.978183	-0.144011	0.00787024	0.0223616	-1.6505	0.151437	0.00517668	0.013683	1.86382	0.152411	0.00489335	0.0133155	1.87564	0.0421701	0.438111	0.641036	0.193117	0.013657	0.801786	0.877666	0.0566709	0.08702	0.109196	0.36127	0.442168	0.0764539	0.15947	0.449458
479	GO_CHEMICAL_HOMEOSTASIS	497	-0.19383	0.000331047	0.00130012	-2.88602	-0.0895956	0.0995889	0.181705	-0.740634	0.0234416	0.667144	0.748232	0.125964	-0.0117361	0.829539	0.880838	-0.0551039	-0.0429852	0.43018	0.528627	-0.276851	-0.0553995	0.30914	0.407466	-0.389909	-0.0463214	0.395228	0.494873	-0.305506	-0.0521782	0.33816	0.442294	-0.354289	-0.175048	0.00121177	0.031082	-1.50749	-0.187549	0.000518046	0.0488235	-1.31137	-0.0958743	0.0779382	0.307767	-0.511779	-0.121893	0.0248088	0.199504
480	GO_CHEMOATTRACTANT_ACTIVITY	15	0.0596641	0.272457	0.380965	0.419115	0.10937	0.0439137	0.0964013	1.01592	-0.0118325	0.827822	0.878594	-0.0562117	0.0313815	0.563988	0.669651	0.174151	-0.0229136	0.673599	0.746945	-0.126711	-0.0429471	0.429712	0.52674	-0.278403	0.0358318	0.510036	0.605105	0.218169	0.0397978	0.464327	0.566035	0.247157	0.110496	0.0417756	0.173934	0.759615	0.121792	0.024768	0.143428	0.843366	0.10892	0.0447933	0.247624	0.606207	0.103227	0.0572678	0.283143
481	GO_CHEMOKINE_RECEPTOR_BINDING	19	0.0778157	0.152152	0.236337	0.626469	0.116598	0.0316539	0.0745887	1.12733	0.066236	0.223036	0.320128	0.494677	0.082189	0.130368	0.21926	0.659042	0.0174271	0.748709	0.808971	0.0920672	-0.0229942	0.672517	0.742585	-0.129254	0.104586	0.0540537	0.0967897	1.01417	0.0986143	0.0693727	0.120235	0.919968	0.0434683	0.424132	0.63114	0.199875	0.0840535	0.121849	0.287275	0.541703	0.0265496	0.6255	0.807008	0.0931221	0.0163197	0.764189	0.898376
482	GO_CHEMOREPELLENT_ACTIVITY	19	-0.0440878	0.417553	0.528352	-0.277076	-0.0404662	0.456855	0.577439	-0.238494	-0.0119537	0.826086	0.877172	-0.0569152	-0.0106894	0.844232	0.892614	-0.0493362	-0.0513577	0.344927	0.444582	-0.352048	-0.0703983	0.195249	0.282664	-0.548729	-0.0454779	0.403012	0.503197	-0.298262	-0.042517	0.434351	0.537478	-0.269639	-0.0709989	0.191458	0.406597	-0.390836	-0.105391	0.0522227	0.189473	-0.722452	-0.00874819	0.872251	0.941767	-0.0260563	-0.0131389	0.809159	0.918739
483	GO_CHLORIDE_TRANSPORT	37	-0.273464	3.37687e-07	3.05921e-06	-5.51439	-0.101969	0.0603796	0.123434	-0.908565	-0.0719023	0.185858	0.2762	-0.558776	-0.103566	0.0564514	0.112345	-0.949446	-0.0127985	0.814012	0.861255	-0.0648685	-0.0134244	0.805095	0.853246	-0.0689257	-0.106287	0.0502466	0.0911516	-1.04024	-0.106444	0.0499048	0.0921055	-1.03571	-0.0978055	0.0716972	0.233361	-0.631972	-0.143764	0.00797791	0.0959302	-1.01804	-0.045786	0.399831	0.66242	-0.178867	-0.0708997	0.192081	0.486517
484	GO_CHONDROCYTE_DEVELOPMENT	18	-0.0290883	0.59282	0.691285	-0.160343	0.148469	0.00613364	0.0207104	1.68381	0.161306	0.00288427	0.00946469	2.02389	0.127402	0.0188219	0.0458136	1.33901	-0.213044	7.79688e-05	0.000626863	-3.20283	-0.189589	0.000449648	0.00232704	-2.6332	0.162878	0.0026199	0.00771687	2.11256	0.15136	0.00519977	0.0139775	1.85457	0.0020966	0.969261	0.986919	0.00571842	-0.0275703	0.612268	0.741193	-0.130069	0.0954986	0.0786787	0.308175	0.511202	0.0590739	0.277234	0.578375
485	GO_CHONDROCYTE_DIFFERENTIATION	43	0.00851463	0.875634	0.917469	0.0374088	0.170601	0.00161374	0.00741585	2.12984	0.178633	0.00095427	0.00380171	2.42002	0.141854	0.00885833	0.0250111	1.60187	-0.228489	2.20816e-05	0.000232355	-3.63385	-0.221549	3.93457e-05	0.000346244	-3.46062	0.187615	0.000516521	0.00196749	2.70609	0.175809	0.00115076	0.00398894	2.39914	0.0180081	0.740626	0.853531	0.0687805	-0.00962323	0.859599	0.91539	-0.0383937	0.132302	0.0146879	0.153323	0.814392	0.0931797	0.0862418	0.341117
486	GO_CHONDROITIN_SULFATE_BIOSYNTHETIC_PROCESS	19	0.0461707	0.39588	0.507597	0.294481	0.0194892	0.720154	0.800773	0.0964903	0.0761963	0.160884	0.246273	0.608583	0.0613311	0.259266	0.373633	0.427555	-0.118072	0.0295509	0.0643611	-1.19138	-0.136481	0.0118158	0.0308813	-1.5103	0.0551729	0.310242	0.408431	0.388881	0.0497007	0.360731	0.4659	0.331707	-0.0683164	0.208814	0.426092	-0.370496	-0.10351	0.056586	0.195368	-0.709147	0.0596125	0.272872	0.555781	0.255096	0.054543	0.315804	0.614951
487	GO_CHONDROITIN_SULFATE_PROTEOGLYCAN_BIOSYNTHETIC_PROCESS	21	0.0432967	0.425964	0.536086	0.270766	0.0540365	0.320324	0.443024	0.353573	0.0910318	0.0937594	0.159323	0.797723	0.0917802	0.0910829	0.1653	0.781727	-0.132921	0.0142269	0.0366639	-1.43576	-0.162618	0.00266198	0.0096109	-2.01724	0.0857029	0.11468	0.180538	0.743432	0.0823294	0.129711	0.201549	0.695618	-0.0426528	0.432883	0.637947	-0.195215	-0.0817631	0.132377	0.299654	-0.52338	0.0741696	0.172337	0.446987	0.349705	0.0665184	0.221066	0.515704
488	GO_CHONDROITIN_SULFATE_PROTEOGLYCAN_METABOLIC_PROCESS	30	0.0472179	0.385243	0.496546	0.304041	0.0931614	0.0863038	0.1629	0.788079	0.141985	0.00879532	0.0232755	1.6331	0.138174	0.0108011	0.0293912	1.53178	-0.169064	0.00178003	0.00722119	-2.14139	-0.206208	0.000132569	0.00091051	-3.04072	0.140299	0.0096376	0.0229864	1.63853	0.135916	0.0121722	0.0285156	1.54492	-0.0376264	0.489067	0.680882	-0.166928	-0.0692125	0.202894	0.377296	-0.423318	0.0714636	0.188563	0.46151	0.335819	0.0617185	0.256264	0.55595
489	GO_CHROMATIN	383	0.401918	1.24542e-14	6.13022e-12	11.2125	0.251957	2.54027e-06	7.16777e-05	4.14462	0.240019	7.64074e-06	7.8238e-05	4.10658	0.2583	1.38295e-06	2.55269e-05	4.593	-0.15173	0.00505182	0.016112	-1.79285	-0.183288	0.000683698	0.00326729	-2.48581	0.289158	5.68086e-08	1.16338e-06	5.93428	0.283974	9.9849e-08	2.03839e-06	5.69071	0.0950447	0.08011	0.247625	0.606205	0.123064	0.0232406	0.14052	0.852263	0.118514	0.0288928	0.2089	0.680061	0.122835	0.0234998	0.194686
490	GO_CHROMATIN_ASSEMBLY_OR_DISASSEMBLY	151	0.394361	4.24749e-14	8.18104e-12	11.0872	0.214852	6.5016e-05	0.000684135	3.16486	0.213807	7.06924e-05	0.000444621	3.35201	0.229911	1.85862e-05	0.00016556	3.78104	-0.119484	0.0275974	0.0612814	-1.21267	-0.152264	0.00489753	0.0153932	-1.81267	0.251345	2.69161e-06	2.44843e-05	4.61111	0.247148	3.98514e-06	3.67795e-05	4.43439	0.0791434	0.145326	0.346311	0.460533	0.113357	0.0366852	0.164157	0.78474	0.0927622	0.0876669	0.32283	0.491026	0.10332	0.0570131	0.282546
491	GO_CHROMATIN_BINDING	345	0.320427	1.47754e-09	2.80907e-08	7.55144	0.281112	1.35663e-07	1.03221e-05	4.98623	0.309116	5.81349e-09	3.02985e-07	6.51858	0.312581	3.84449e-09	3.40622e-07	6.46773	-0.243719	5.46401e-06	7.1614e-05	-4.145	-0.254597	1.97619e-06	3.10981e-05	-4.50727	0.352342	2.25252e-11	2.72166e-09	8.56517	0.341128	1.03487e-10	1.20644e-08	7.91849	0.0345634	0.525324	0.704568	0.152077	0.0398575	0.463851	0.62368	0.205038	0.108795	0.0450009	0.247624	0.606207	0.0873632	0.107826	0.376781
492	GO_CHROMATIN_DNA_BINDING	67	0.363203	6.70224e-12	2.88261e-10	9.54021	0.260831	1.18129e-06	4.15327e-05	4.38161	0.241765	6.9612e-06	7.22204e-05	4.14134	0.275259	2.81219e-07	7.59633e-06	5.1194	-0.178638	0.00095392	0.0044436	-2.35226	-0.19415	0.000324731	0.00181566	-2.74096	0.288505	7.00476e-08	1.36101e-06	5.86614	0.284583	1.06496e-07	2.14444e-06	5.66869	0.0891178	0.100892	0.278528	0.555131	0.115333	0.0335601	0.158543	0.799854	0.120764	0.0260174	0.200099	0.698754	0.113745	0.0360907	0.229928
493	GO_CHROMATIN_MODIFICATION	467	0.359509	8.23194e-12	3.27553e-10	9.48472	0.289283	5.603e-08	5.88051e-06	5.23059	0.293415	3.54423e-08	1.18947e-06	5.92465	0.307347	7.16605e-09	5.2042e-07	6.28365	-0.22445	2.95612e-05	0.000297627	-3.52633	-0.242121	6.3192e-06	7.94669e-05	-4.09981	0.345315	5.89825e-11	5.93846e-09	8.22633	0.33829	1.50773e-10	1.66981e-08	7.77733	0.0855403	0.115403	0.300022	0.522847	0.0926186	0.0881609	0.242429	0.615416	0.12943	0.0169476	0.164347	0.784238	0.113344	0.0367085	0.231321
494	GO_CHROMATIN_ORGANIZATION	558	0.375829	8.16742e-13	6.46102e-11	10.1897	0.25689	1.6426e-06	5.39017e-05	4.2684	0.264691	7.65647e-07	1.20705e-05	4.91827	0.27787	1.99287e-07	6.08856e-06	5.21549	-0.169069	0.0017847	0.00722689	-2.14105	-0.201661	0.000185689	0.00116963	-2.93195	0.309269	6.01175e-09	2.06176e-07	6.68576	0.301633	1.46472e-08	4.50605e-07	6.3462	0.0746429	0.170325	0.378793	0.421598	0.0994182	0.0675114	0.213625	0.670347	0.102825	0.0585941	0.27614	0.558871	0.0979509	0.071681	0.317547
495	GO_CHROMATIN_REMODELING	130	0.406219	6.10892e-15	4.51042e-12	11.3458	0.241243	6.84255e-06	0.000142737	3.84546	0.244567	5.05603e-06	5.55477e-05	4.25533	0.266499	6.15231e-07	1.38349e-05	4.85902	-0.156839	0.00374008	0.0127745	-1.89366	-0.180485	0.000828123	0.00378138	-2.42235	0.279904	1.54245e-07	2.59812e-06	5.58534	0.276518	2.20302e-07	3.85282e-06	5.41422	0.0902824	0.0965149	0.272501	0.564632	0.113586	0.0363061	0.163285	0.787052	0.111149	0.0405313	0.238451	0.622601	0.112092	0.0388489	0.237668
496	GO_CHROMATIN_SILENCING	79	0.380103	5.34054e-13	4.67467e-11	10.3302	0.221084	4.08695e-05	0.000497395	3.3033	0.207551	0.000119602	0.000686319	3.16347	0.224257	3.1472e-05	0.00024417	3.61231	-0.125785	0.0203923	0.0485166	-1.31411	-0.147631	0.00643091	0.0190307	-1.72055	0.253459	2.38431e-06	2.24257e-05	4.64925	0.247386	4.18622e-06	3.81583e-05	4.41841	0.100542	0.0640795	0.220934	0.655737	0.126007	0.0201702	0.134367	0.871708	0.120041	0.0269286	0.202839	0.692849	0.126528	0.0196568	0.181477
497	GO_CHROMATIN_SILENCING_AT_RDNA	36	0.38222	3.81042e-13	3.75115e-11	10.4258	0.21626	6.03873e-05	0.000650502	3.18675	0.211287	8.95101e-05	0.000540968	3.26683	0.238908	8.97442e-06	9.60306e-05	4.01759	-0.13701	0.0114899	0.0312462	-1.5052	-0.15217	0.00496218	0.0155134	-1.80929	0.254766	2.10827e-06	2.03478e-05	4.69148	0.250164	3.24149e-06	3.11792e-05	4.50614	0.0851982	0.116838	0.301978	0.520024	0.116973	0.031108	0.15554	0.808158	0.112045	0.0389767	0.235241	0.628487	0.120721	0.0260709	0.203226
498	GO_CHROMOSOMAL_REGION	299	0.384382	2.22069e-13	2.80528e-11	10.552	0.206442	0.000129038	0.00109041	2.96241	0.228162	2.22067e-05	0.000183537	3.73628	0.241582	6.84741e-06	7.96169e-05	4.09899	-0.13348	0.0139105	0.0361217	-1.44223	-0.150304	0.00555541	0.0169962	-1.76965	0.25279	2.4296e-06	2.27551e-05	4.64292	0.247185	4.10431e-06	3.76441e-05	4.4243	0.0646838	0.234912	0.454437	0.342526	0.0931306	0.0868771	0.240842	0.618268	0.074627	0.170417	0.444347	0.352278	0.0825	0.129529	0.40696
499	GO_CHROMOSOME	762	0.366608	3.69392e-12	1.85956e-10	9.73059	0.222763	3.68881e-05	0.00046293	3.33448	0.235039	1.30095e-05	0.000121075	3.91694	0.238485	9.61048e-06	9.9473e-05	4.00229	-0.142335	0.00888244	0.0254523	-1.59427	-0.166531	0.00216085	0.00814579	-2.08907	0.266139	7.1515e-07	8.7517e-06	5.05791	0.259014	1.43779e-06	1.67177e-05	4.77682	0.0680513	0.212743	0.430147	0.366383	0.0966204	0.0765156	0.224926	0.647959	0.0817956	0.134003	0.392875	0.405746	0.0850821	0.119014	0.391703
500	GO_CHROMOSOME_CENTROMERIC_REGION	159	0.372059	1.32812e-12	8.82538e-11	10.0543	0.200893	0.000192451	0.00149048	2.82667	0.203885	0.000153435	0.000833303	3.0792	0.220218	4.20227e-05	0.000303193	3.51828	-0.115848	0.0327239	0.0697292	-1.15659	-0.134765	0.0128773	0.0330704	-1.48056	0.233025	1.41927e-05	9.44051e-05	4.025	0.227891	2.20968e-05	0.000146321	3.83469	0.0685443	0.207408	0.424397	0.372228	0.0914607	0.0922256	0.249122	0.603589	0.0818278	0.132119	0.38896	0.410095	0.0899774	0.0976506	0.36027
501	GO_CHROMOSOME_CONDENSATION	23	0.368178	3.26407e-12	1.76339e-10	9.75365	0.161117	0.0029177	0.0118148	1.92757	0.16408	0.00243275	0.00827099	2.08244	0.178339	0.00097316	0.00404798	2.39276	-0.122108	0.0243948	0.0558784	-1.25276	-0.105688	0.0515594	0.098878	-1.0049	0.186429	0.00056104	0.00210093	2.67759	0.185084	0.000615772	0.00237206	2.62487	0.0500137	0.357712	0.568979	0.244904	0.0580636	0.285545	0.455186	0.341811	0.075124	0.16687	0.440282	0.356269	0.0766753	0.158262	0.448275
502	GO_CHROMOSOME_LOCALIZATION	52	0.359208	8.59204e-12	3.36838e-10	9.47258	0.211798	8.29452e-05	0.000797358	3.09835	0.17829	0.00096037	0.00381222	2.41882	0.200726	0.000194884	0.00106322	2.97338	-0.0833663	0.124978	0.200091	-0.698771	-0.109589	0.0434488	0.0867558	-1.0617	0.226163	2.55876e-05	0.000157654	3.80229	0.225291	2.75435e-05	0.000175313	3.75619	0.0945671	0.0816462	0.249615	0.602729	0.127292	0.0188716	0.131904	0.879743	0.088611	0.102869	0.353544	0.451557	0.096998	0.0740697	0.321695
503	GO_CHROMOSOME_ORGANIZATION	860	0.365669	4.22938e-12	2.01464e-10	9.6958	0.231672	1.74135e-05	0.000271495	3.56624	0.24481	5.44718e-06	5.94274e-05	4.22601	0.248371	3.92983e-06	5.4234e-05	4.26573	-0.139136	0.0105533	0.0292195	-1.53433	-0.164065	0.00251819	0.00915894	-2.03816	0.278141	2.10539e-07	3.34616e-06	5.47545	0.27052	4.60816e-07	6.96729e-06	5.15694	0.0695275	0.202963	0.419401	0.377371	0.0991419	0.0691067	0.215369	0.666817	0.0791039	0.147329	0.413055	0.383992	0.0789308	0.148219	0.435111
504	GO_CHROMOSOME_ORGANIZATION_INVOLVED_IN_MEIOTIC_CELL_CYCLE	28	0.262114	1.04323e-06	8.23802e-06	5.08418	0.168613	0.0018317	0.00819861	2.08626	0.220776	4.19116e-05	0.000298934	3.52442	0.222907	3.51869e-05	0.000266458	3.57437	-0.184222	0.00065344	0.0032672	-2.48582	-0.137665	0.0110978	0.0292637	-1.53367	0.237207	1.04239e-05	7.37664e-05	4.13214	0.234351	1.33716e-05	9.75455e-05	4.01079	0.0729459	0.179541	0.390151	0.408768	0.0745863	0.169934	0.342029	0.465937	0.0320355	0.555891	0.769738	0.113657	0.0177306	0.744484	0.892009
505	GO_CHROMOSOME_SEGREGATION	234	0.360532	7.11529e-12	2.94749e-10	9.53055	0.197145	0.000254441	0.00186928	2.72833	0.209123	0.000102382	0.000605546	3.21785	0.218428	4.86692e-05	0.000342773	3.46499	-0.125177	0.0209577	0.0494632	-1.30572	-0.132129	0.0147658	0.036852	-1.43354	0.235919	1.10101e-05	7.71753e-05	4.11252	0.231149	1.6704e-05	0.00011635	3.93423	0.0692167	0.202976	0.419401	0.377371	0.0905482	0.0955336	0.253878	0.595376	0.073276	0.177665	0.451183	0.345647	0.0785706	0.14827	0.435111
506	GO_CHROMOSOME_SEPARATION	16	0.206295	0.00013169	0.000581776	3.23524	0.0793297	0.144317	0.243275	0.613903	0.189464	0.000453627	0.00202578	2.69341	0.15641	0.00387108	0.0127501	1.89449	-0.120275	0.0266313	0.0599779	-1.22201	-0.0736936	0.175113	0.260319	-0.584494	0.165449	0.00223451	0.00674268	2.17117	0.155037	0.004198	0.0117258	1.93086	-0.0696305	0.200175	0.417503	-0.379341	-0.0724885	0.18229	0.356668	-0.447735	-0.0365996	0.501007	0.730263	-0.13652	-0.0434195	0.424653	0.699864
507	GO_CHROMOSOME_TELOMERIC_REGION	147	0.391432	6.77647e-14	1.11184e-11	10.954	0.204354	0.000148034	0.00120771	2.91804	0.215755	6.04589e-05	0.000394291	3.40418	0.242222	6.262e-06	7.60018e-05	4.11918	-0.116713	0.0314355	0.0675033	-1.17067	-0.131957	0.0148975	0.0371389	-1.43017	0.251125	2.74792e-06	2.49452e-05	4.60301	0.24619	4.35452e-06	3.92883e-05	4.40574	0.0804484	0.138784	0.337562	0.471646	0.115357	0.0334736	0.158543	0.799854	0.081282	0.134726	0.394105	0.404388	0.0930402	0.086717	0.341584
508	GO_CILIARY_BASAL_BODY	68	0.266892	6.52868e-07	5.41611e-06	5.26631	0.26166	1.09021e-06	3.89487e-05	4.40951	0.189262	0.000460137	0.00205071	2.6881	0.19728	0.000258614	0.00132762	2.87693	-0.224541	3.0739e-05	0.000303282	-3.51815	-0.194124	0.000325333	0.00181566	-2.74096	0.247198	4.25865e-06	3.5462e-05	4.45024	0.250704	3.0832e-06	2.98875e-05	4.52451	0.167947	0.00191043	0.0372829	1.42849	0.123114	0.0232372	0.14052	0.852263	0.196314	0.000277536	0.0245897	1.60925	0.194691	0.00031226	0.028356
509	GO_CILIARY_BASE	22	0.266296	6.92508e-07	5.69167e-06	5.24476	0.270088	4.74807e-07	2.59092e-05	4.58655	0.342033	1.20753e-10	2.01676e-08	7.69535	0.346447	6.7431e-11	2.71563e-08	7.56613	-0.36925	2.78828e-12	1.61491e-09	-8.79185	-0.348715	4.97925e-11	1.3547e-08	-7.86816	0.356286	1.77324e-11	2.36786e-09	8.62564	0.350895	3.71044e-11	5.47908e-09	8.26129	0.0604524	0.266163	0.486428	0.312981	0.00993709	0.855069	0.911662	0.0401659	0.118029	0.0296106	0.209862	0.678067	0.0872966	0.108071	0.376781
510	GO_CILIARY_MEMBRANE	38	0.141594	0.00898438	0.0220748	1.6561	0.306702	9.24223e-09	1.70596e-06	5.76803	0.243457	5.98049e-06	6.36865e-05	4.19595	0.221972	3.80024e-05	0.000282467	3.54903	-0.310398	6.02324e-09	3.69928e-07	-6.43188	-0.360511	9.82306e-12	5.43952e-09	-8.26444	0.301409	1.68958e-08	4.50893e-07	6.34593	0.308118	7.84923e-09	3.10465e-07	6.50799	0.117787	0.0299478	0.143	0.844664	0.0521445	0.33758	0.507849	0.294265	0.215534	6.39912e-05	0.0123437	1.90855	0.178929	0.000935528	0.042609
511	GO_CILIARY_PART	200	0.211826	8.58077e-05	0.000402678	3.39504	0.302156	1.55266e-08	2.37183e-06	5.62492	0.204277	0.000153558	0.000833303	3.0792	0.183887	0.000668639	0.00294734	2.53057	-0.273755	3.27846e-07	7.37237e-06	-5.13239	-0.259288	1.37078e-06	2.34462e-05	-4.62993	0.269701	4.93556e-07	6.5073e-06	5.1866	0.274699	2.97779e-07	4.88579e-06	5.31107	0.20302	0.000168842	0.0158576	1.79976	0.136934	0.011536	0.113054	0.946716	0.254542	2.15336e-06	0.00238979	2.62164	0.233192	1.47804e-05	0.00913434
512	GO_CILIARY_PLASM	53	0.146852	0.00671902	0.0172352	1.76358	0.23012	1.92299e-05	0.000293753	3.53202	0.177571	0.00102419	0.00402229	2.39553	0.167519	0.00196275	0.00723377	2.14064	-0.226335	2.6467e-05	0.000270782	-3.56738	-0.196119	0.000281512	0.00162594	-2.7889	0.224079	3.19391e-05	0.000192504	3.71556	0.223938	3.23154e-05	0.000199986	3.699	0.152706	0.00481036	0.055161	1.25837	0.10551	0.0519563	0.189361	0.722708	0.178748	0.000946922	0.0424521	1.3721	0.157718	0.00358119	0.0801183
513	GO_CILIARY_TIP	42	0.0973589	0.0730079	0.129681	0.887123	0.208436	0.000111718	0.000983453	3.00725	0.174036	0.00129251	0.00491064	2.30886	0.173474	0.00134064	0.00530134	2.27561	-0.243368	6.02869e-06	7.71882e-05	-4.11245	-0.181952	0.000763078	0.00355368	-2.44932	0.209024	0.000106747	0.000521952	3.28237	0.203844	0.000158669	0.000759894	3.11925	0.127011	0.0191912	0.110553	0.956429	0.08889	0.101768	0.262799	0.580377	0.162601	0.00266483	0.065222	1.18561	0.13645	0.0118348	0.14523
514	GO_CILIARY_TRANSITION_ZONE	24	0.278396	2.03627e-07	1.96958e-06	5.70563	0.307692	8.24557e-09	1.66036e-06	5.7798	0.277516	2.23009e-07	4.89075e-06	5.31062	0.278169	2.08465e-07	6.19797e-06	5.20775	-0.294623	3.59951e-08	1.35134e-06	-5.86923	-0.266567	6.74196e-07	1.32154e-05	-4.87892	0.329182	6.24144e-10	3.65004e-08	7.4377	0.333481	3.63401e-10	3.14836e-08	7.50192	0.161734	0.00281006	0.0447434	1.34927	0.12963	0.0168309	0.127576	0.89423	0.177959	0.000998119	0.0424521	1.3721	0.157017	0.00373404	0.0810873
515	GO_CILIUM	293	0.198136	0.000236443	0.00096184	3.0169	0.297732	2.17929e-08	2.76543e-06	5.55824	0.199306	0.000216739	0.00110617	2.95618	0.201489	0.00018401	0.00100887	2.99617	-0.280118	1.50786e-07	4.09806e-06	-5.38742	-0.256249	1.68639e-06	2.76693e-05	-4.558	0.271641	3.6506e-07	5.11777e-06	5.29092	0.279185	1.66433e-07	3.0979e-06	5.50893	0.202773	0.000166979	0.0158576	1.79976	0.147607	0.00639779	0.0894076	1.04863	0.229402	1.94172e-05	0.00895524	2.04792	0.205865	0.000131831	0.0253903
516	GO_CILIUM_MORPHOGENESIS	166	0.164137	0.00242413	0.00723159	2.14077	0.264421	8.32805e-07	3.41552e-05	4.46654	0.218091	5.212e-05	0.000350899	3.45482	0.20073	0.000200437	0.00108153	2.96596	-0.269795	4.8896e-07	1.01219e-05	-4.99474	-0.237251	1.03832e-05	0.000117641	-3.92944	0.265097	7.7937e-07	9.2812e-06	5.0324	0.269587	4.99245e-07	7.49713e-06	5.1251	0.175262	0.00119287	0.0310719	1.50763	0.129716	0.0167572	0.127332	0.895062	0.201275	0.000192445	0.0214263	1.66905	0.181641	0.000779347	0.0400693
517	GO_CILIUM_MOVEMENT	23	-0.0497325	0.360424	0.471971	-0.326085	0.0939751	0.0835844	0.158785	0.799189	0.0297343	0.584629	0.67604	0.170028	0.0366259	0.5007	0.614092	0.211766	-0.070406	0.195201	0.285769	-0.543984	-0.0606206	0.264833	0.360765	-0.442775	0.0539498	0.321102	0.419983	0.376768	0.0571617	0.293104	0.392281	0.406403	0.162744	0.00264146	0.0438265	1.35826	0.13432	0.013232	0.115846	0.93612	0.130964	0.0157286	0.157642	0.802328	0.116724	0.0314695	0.215934
518	GO_CILIUM_ORGANIZATION	151	0.174459	0.00125731	0.00413951	2.38305	0.255314	2.00197e-06	6.24559e-05	4.20443	0.202719	0.000172714	0.000919621	3.03639	0.190763	0.000413796	0.00196111	2.7075	-0.258811	1.43495e-06	2.3988e-05	-4.62001	-0.218815	4.91589e-05	0.000410587	-3.38659	0.252905	2.51137e-06	2.3365e-05	4.63143	0.258151	1.52859e-06	1.75733e-05	4.75515	0.181459	0.000789053	0.0274216	1.56191	0.138337	0.0107079	0.107322	0.969312	0.194244	0.000322534	0.0251316	1.59978	0.175306	0.00118943	0.0460345
519	GO_CIRCADIAN_REGULATION_OF_GENE_EXPRESSION	49	-0.0258883	0.634139	0.7259	-0.139123	0.0107651	0.843143	0.892364	0.049458	0.142198	0.00869364	0.0230754	1.63685	0.124492	0.0217295	0.0515236	1.28799	-0.119477	0.0276582	0.0613229	-1.21238	-0.0763559	0.160006	0.241921	-0.616327	0.0956754	0.0781249	0.131895	0.879771	0.0895993	0.0990581	0.162702	0.788607	-0.13573	0.0122919	0.087125	-1.05986	-0.11739	0.0305084	0.154636	-0.810688	-0.0900939	0.0972023	0.343386	-0.464217	-0.115103	0.0339163	0.222624
520	GO_CIRCADIAN_RHYTHM	90	0.121043	0.0256733	0.0543136	1.26509	0.0447586	0.410499	0.533443	0.272912	0.198205	0.00024164	0.00120684	2.91835	0.182395	0.000740431	0.00322528	2.49143	-0.136113	0.0120468	0.0324225	-1.48915	-0.0890946	0.100981	0.167859	-0.775056	0.157052	0.00372612	0.0103685	1.98428	0.148681	0.00606019	0.015895	1.79874	-0.146148	0.00698949	0.0661172	-1.17969	-0.109031	0.0445752	0.175803	-0.754975	-0.0780856	0.150732	0.418385	-0.378424	-0.0918116	0.0909718	0.348612
521	GO_CIRCULATORY_SYSTEM_DEVELOPMENT	577	0.00690716	0.899173	0.934178	0.0295702	0.0782089	0.150757	0.251073	0.600199	0.114419	0.0352211	0.0725044	1.13964	0.0802927	0.140141	0.23191	0.634681	-0.119899	0.027287	0.060868	-1.21561	-0.150792	0.00540165	0.0165909	-1.78013	0.104335	0.0549653	0.0980653	1.00848	0.0974035	0.0732892	0.126233	0.898827	-0.0692912	0.203158	0.419401	-0.377371	-0.0770433	0.156956	0.329066	-0.482717	0.0432157	0.42771	0.683205	0.165449	0.0164871	0.762303	0.898075
522	GO_CIRCULATORY_SYSTEM_PROCESS	189	0.0307984	0.571256	0.672343	0.172409	0.114607	0.034697	0.0804058	1.09471	0.165334	0.00225059	0.00775282	2.11054	0.130089	0.0164442	0.0412501	1.38457	-0.205356	0.000141469	0.00100273	-2.99882	-0.201725	0.000186086	0.00116963	-2.93195	0.146744	0.00676	0.0170581	1.76807	0.138437	0.0106505	0.025435	1.59457	-0.0515741	0.342896	0.556217	-0.254756	-0.0790186	0.145902	0.316011	-0.500298	0.0740606	0.17297	0.447152	0.349545	0.0431804	0.427209	0.70076
523	GO_CIS_GOLGI_NETWORK	38	-0.107764	0.0471235	0.0898653	-1.04641	-0.171143	0.00155861	0.00723759	-2.14041	-0.117983	0.0296746	0.0634759	-1.19739	-0.152183	0.0049585	0.0155458	-1.80839	0.0766646	0.15832	0.241765	0.616607	0.0726082	0.181567	0.26749	0.572692	-0.172762	0.00140404	0.0045802	-2.33912	-0.169347	0.00174826	0.0056227	-2.25005	-0.101434	0.0617476	0.216564	-0.664414	-0.133653	0.0136988	0.117751	-0.929034	-0.077423	0.154235	0.422729	-0.373938	-0.0764646	0.159411	0.449458
524	GO_CIS_TRANS_ISOMERASE_ACTIVITY	35	0.081488	0.133687	0.212652	0.672331	-0.0420227	0.439716	0.560881	-0.251129	-0.223295	3.40788e-05	0.000257627	-3.58901	-0.126611	0.0195761	0.0473115	-1.32503	0.182574	0.000731433	0.00358038	2.44607	0.142879	0.00837563	0.0233359	1.63198	-0.161361	0.00287463	0.00832873	-2.07942	-0.146922	0.00669271	0.017308	-1.76175	0.132641	0.0144337	0.0948687	1.02288	0.150366	0.00550551	0.0829572	1.08115	0.069813	0.198996	0.473155	0.324997	0.0947103	0.0811871	0.332974
525	GO_CLATHRIN_ADAPTOR_COMPLEX	26	0.100731	0.0635807	0.115768	0.936413	0.139596	0.0100098	0.0301656	1.52049	0.0553432	0.308748	0.41131	0.385831	0.0822452	0.130105	0.218983	0.65959	-0.0751979	0.166452	0.251581	-0.599323	-0.08933	0.10008	0.166487	-0.778619	0.123712	0.0225717	0.0466757	1.33091	0.13111	0.015612	0.0350773	1.45497	0.123702	0.0225827	0.121076	0.916941	0.109317	0.0440174	0.174349	0.758581	0.125126	0.0210643	0.179798	0.745216	0.11804	0.0295954	0.21258
526	GO_CLATHRIN_BINDING	36	0.2144	7.00354e-05	0.000339821	3.46875	0.0879017	0.105642	0.19001	0.721223	0.260684	1.19825e-06	1.71244e-05	4.76639	0.229396	2.04503e-05	0.000175912	3.7547	-0.248435	3.80201e-06	5.34695e-05	-4.27189	-0.192613	0.000362666	0.00196407	-2.70684	0.210114	9.80882e-05	0.000487689	3.31186	0.199633	0.000217457	0.000983997	3.00701	-0.0970478	0.0739324	0.23727	-0.624757	-0.121264	0.0254032	0.144361	-0.840549	-0.000578267	0.991522	0.996018	-0.00173269	-0.0183125	0.736403	0.889109
527	GO_CLATHRIN_COAT	44	0.164376	0.00236193	0.00707939	2.15	0.244105	5.27421e-06	0.000119146	3.92392	0.287298	6.96412e-08	1.97763e-06	5.70385	0.259045	1.28626e-06	2.42474e-05	4.61534	-0.254116	2.06917e-06	3.23902e-05	-4.48959	-0.234263	1.27376e-05	0.000139672	-3.85489	0.314805	2.93997e-09	1.22869e-07	6.91056	0.303148	1.1705e-08	4.08294e-07	6.38903	0.029043	0.593572	0.755177	0.121951	-0.00512777	0.924947	0.956238	-0.019434	0.110631	0.0414821	0.241162	0.61769	0.0861421	0.112857	0.382522
528	GO_CLATHRIN_COAT_OF_COATED_PIT	16	0.224008	3.21279e-05	0.000172937	3.76211	0.140245	0.00966591	0.0294093	1.53151	0.220338	4.34381e-05	0.000307543	3.51209	0.224104	3.18737e-05	0.000246854	3.60756	-0.224711	3.03077e-05	0.000301715	-3.5204	-0.229385	2.04694e-05	0.00020609	-3.68594	0.211489	8.8105e-05	0.000445046	3.3516	0.20718	0.000123061	0.000611851	3.21335	-0.0119665	0.825903	0.908329	-0.0417569	-0.0343324	0.527909	0.677277	-0.169234	0.0856424	0.114937	0.368917	0.433072	0.0679018	0.211595	0.507323
529	GO_CLATHRIN_COATED_ENDOCYTIC_VESICLE	36	0.0504982	0.353069	0.464951	0.332593	0.0652519	0.229999	0.345388	0.461693	0.0641788	0.237766	0.336949	0.472435	0.0845537	0.119639	0.205109	0.688016	-0.0554394	0.307907	0.406687	-0.390739	-0.0813127	0.134527	0.210883	-0.675958	0.0848828	0.118202	0.185226	0.732297	0.0900765	0.0972671	0.160362	0.794898	-0.0222947	0.681927	0.817132	-0.0877077	-0.00238421	0.965047	0.980072	-0.00874218	0.0149925	0.782866	0.898704	0.0463835	0.00763532	0.888389	0.955491
530	GO_CLATHRIN_COATED_ENDOCYTIC_VESICLE_MEMBRANE	29	0.0600619	0.269268	0.378215	0.422262	0.0479778	0.377635	0.499977	0.30105	0.0332067	0.541533	0.635663	0.196773	0.0601321	0.268708	0.383004	0.416797	-0.0280365	0.606265	0.689185	-0.161664	-0.0649323	0.232293	0.324215	-0.489166	0.0579488	0.286499	0.383326	0.416432	0.0628958	0.247292	0.340916	0.467352	-0.011082	0.838588	0.913885	-0.0391084	0.0128364	0.813472	0.885425	0.0528482	0.0216416	0.690757	0.846723	0.0722588	0.0175019	0.747667	0.892526
531	GO_CLATHRIN_COATED_VESICLE	110	0.0805205	0.13843	0.218703	0.660145	0.0680302	0.210845	0.324321	0.489025	0.166034	0.00212917	0.00740946	2.13021	0.141367	0.00904875	0.0254352	1.59456	-0.159676	0.00315313	0.0111747	-1.95176	-0.184341	0.000635757	0.00307804	-2.51173	0.139653	0.00993066	0.0235256	1.62846	0.141915	0.00878228	0.0216062	1.66542	-0.0570664	0.294071	0.511047	-0.291539	-0.0760029	0.162027	0.333434	-0.476991	0.0196787	0.717684	0.86166	0.064664	-0.00327283	0.952055	0.978017
532	GO_CLATHRIN_COATED_VESICLE_MEMBRANE	53	0.15478	0.00426184	0.0117049	1.93163	0.173603	0.00132945	0.00645067	2.19039	0.186593	0.000554671	0.00240665	2.61859	0.193173	0.000348381	0.00170345	2.76867	-0.198021	0.000244924	0.00152604	-2.81643	-0.227872	2.3263e-05	0.000227495	-3.64303	0.212879	7.89871e-05	0.000405461	3.39205	0.219484	4.65647e-05	0.000274676	3.56118	0.0350093	0.519802	0.700767	0.154426	0.015368	0.777568	0.863532	0.0637218	0.101542	0.0614681	0.282533	0.548931	0.0868221	0.110007	0.380359
533	GO_CLATHRIN_MEDIATED_ENDOCYTOSIS	29	0.0598338	0.271093	0.379928	0.420299	0.0213092	0.695269	0.781539	0.10705	0.115833	0.0327962	0.0686612	1.16329	0.0605418	0.265455	0.379466	0.420827	-0.188232	0.000494698	0.00264707	-2.57723	-0.185949	0.00058004	0.00286464	-2.54293	0.0659917	0.22475	0.314878	0.501858	0.0703657	0.195457	0.282227	0.549401	-0.0359115	0.509096	0.69351	-0.158948	-0.0876172	0.106779	0.269074	-0.570129	0.0531071	0.328727	0.606776	0.216972	0.0311629	0.566707	0.799497
534	GO_CLATHRIN_VESICLE_COAT	23	0.201738	0.000185899	0.000779124	3.10839	0.210162	9.77183e-05	0.000890037	3.05059	0.191084	0.000404479	0.00185491	2.73168	0.197017	0.000263646	0.00134402	2.87159	-0.192145	0.000375025	0.00214646	-2.66828	-0.211482	8.81534e-05	0.000657441	-3.18214	0.234892	1.27585e-05	8.72224e-05	4.05937	0.231225	1.74993e-05	0.000120451	3.91919	0.0608954	0.26267	0.483409	0.315685	0.0426666	0.432734	0.595901	0.224826	0.136123	0.0120406	0.136557	0.864685	0.1188	0.0285568	0.210724
535	GO_CLEAVAGE_INVOLVED_IN_RRNA_PROCESSING	19	0.232674	1.54553e-05	9.10467e-05	4.04074	0.081615	0.133081	0.22846	0.64119	0.0615024	0.257936	0.358424	0.445603	0.109157	0.0443287	0.0922189	1.03518	0.0312121	0.566095	0.656149	0.182997	-0.0156089	0.774175	0.828805	-0.0815475	0.0848107	0.118515	0.185521	0.731608	0.0864683	0.111468	0.178849	0.747514	0.0385121	0.478891	0.673139	0.171896	0.0921484	0.0897887	0.24452	0.611685	0.0311803	0.566491	0.776231	0.110009	0.0505275	0.352789	0.647146
536	GO_CLUSTER_OF_ACTIN_BASED_CELL_PROJECTIONS	73	-0.0282029	0.604129	0.7006	-0.15453	0.00615637	0.909905	0.939818	0.0269562	0.0753966	0.165332	0.251691	0.599132	0.0427343	0.432003	0.548828	0.260563	-0.0610139	0.261741	0.359986	-0.443715	-0.131244	0.015506	0.0383753	-1.41595	0.0318364	0.55835	0.646664	0.189321	0.0312383	0.565769	0.656802	0.182566	-0.0986256	0.0693407	0.229233	-0.639723	-0.122667	0.023745	0.14107	-0.850564	-0.0182475	0.737305	0.874464	-0.0582579	-0.0280554	0.606022	0.819128
537	GO_COATED_MEMBRANE	79	0.158508	0.00338388	0.00957253	2.01897	0.123263	0.0230163	0.0581312	1.23559	0.217458	5.26698e-05	0.000353218	3.45196	0.198794	0.000225167	0.0011889	2.92485	-0.177186	0.00103398	0.00474173	-2.32406	-0.142607	0.008455	0.0235127	-1.6287	0.20393	0.000152903	0.000702658	3.15326	0.191814	0.000375214	0.00155782	2.80748	-0.024728	0.649575	0.794763	-0.0997625	-0.0413945	0.446782	0.608267	-0.215906	0.0355594	0.51345	0.738261	0.13179	0.0159526	0.769456	0.900123
538	GO_COATED_PIT	58	0.0536335	0.323951	0.436201	0.360313	0.162456	0.00268853	0.0110484	1.9567	0.219257	4.74311e-05	0.0003278	3.48439	0.183493	0.000686975	0.00302214	2.51968	-0.223256	3.4189e-05	0.000333606	-3.47677	-0.262707	9.84704e-07	1.78051e-05	-4.74946	0.208092	0.000114722	0.000553614	3.25679	0.203218	0.00016634	0.000792353	3.10108	-0.00546789	0.919945	0.961078	-0.0172412	-0.0294171	0.588645	0.722987	-0.14087	0.113412	0.0366411	0.228612	0.640901	0.0826549	0.128197	0.406301
539	GO_COATED_VESICLE	176	0.0437766	0.421043	0.530948	0.274948	0.0404824	0.456867	0.577439	0.238494	0.125554	0.0205717	0.0471458	1.32656	0.0967134	0.0749261	0.141123	0.850401	-0.121094	0.025558	0.0581366	-1.23555	-0.137891	0.0109153	0.0289203	-1.5388	0.0953806	0.0790439	0.133142	0.875684	0.0899624	0.0977066	0.160907	0.793425	-0.0687323	0.206162	0.422433	-0.374243	-0.0919413	0.0905207	0.246319	-0.608503	0.0291207	0.592584	0.790886	0.101886	0.00448572	0.934322	0.968878
540	GO_COATED_VESICLE_MEMBRANE	103	0.132304	0.0146333	0.0335536	1.47426	0.101964	0.0603691	0.123434	0.908565	0.183796	0.000660173	0.00281208	2.55097	0.177316	0.00102502	0.00422138	2.37455	-0.163178	0.00254423	0.00949532	-2.02249	-0.171505	0.00150201	0.00609248	-2.21521	0.175373	0.00116622	0.00394077	2.40442	0.167635	0.00192463	0.00610315	2.21445	-0.0279069	0.608103	0.766401	-0.115544	-0.0469533	0.388102	0.553005	-0.257271	0.0533187	0.326975	0.605138	0.218146	0.0309521	0.569517	0.800431
541	GO_COCHLEA_DEVELOPMENT	23	0.0818586	0.131924	0.210452	0.676848	0.0539684	0.320935	0.443024	0.353573	0.147527	0.00646898	0.0184412	1.73421	0.168443	0.0018515	0.00694509	2.15832	-0.148484	0.00612844	0.0187882	-1.72611	-0.104721	0.0537444	0.101834	-0.992109	0.124416	0.0218108	0.0454904	1.34208	0.11243	0.0383059	0.0735248	1.13357	-0.0968282	0.0745904	0.238677	-0.622189	-0.0718403	0.186239	0.360278	-0.443362	-0.0369956	0.496384	0.725976	-0.139078	-0.0648587	0.232824	0.529923
542	GO_COCHLEA_MORPHOGENESIS	16	-0.0310185	0.568507	0.670462	-0.173626	-0.0139517	0.797602	0.859702	-0.065652	0.0414313	0.446184	0.545569	0.263151	0.0405367	0.45607	0.571539	0.242954	-0.0911811	0.0932204	0.159631	-0.796882	-0.0702487	0.196202	0.283858	-0.546899	0.00714498	0.895514	0.920447	0.0360011	0.00181662	0.973365	0.981976	0.00789914	-0.108333	0.0459632	0.183109	-0.737291	-0.116976	0.0311027	0.15554	-0.808158	-0.0247165	0.649568	0.823313	-0.0844351	-0.0500714	0.357157	0.651139
543	GO_COENZYME_A_METABOLIC_PROCESS	17	-0.00831403	0.878541	0.919644	-0.03638	-0.101531	0.0614963	0.125025	-0.903004	-0.0184871	0.733984	0.803447	-0.095043	-0.0230785	0.671387	0.758156	-0.120241	-0.0294602	0.588099	0.674069	-0.171295	0.0287198	0.597515	0.680986	0.166862	-0.0677699	0.212485	0.30045	-0.522228	-0.0543775	0.317276	0.420007	-0.376744	-0.0474084	0.383327	0.593714	-0.226423	-0.0627389	0.248475	0.421982	-0.374706	-0.0965025	0.0755757	0.302832	-0.518798	-0.0957325	0.0779467	0.328008
544	GO_COENZYME_BINDING	143	-0.0177459	0.744395	0.818687	-0.0868821	-0.0477227	0.380366	0.502691	-0.298699	-0.0332443	0.541262	0.635513	-0.196876	-0.0224792	0.679591	0.764497	-0.116624	-0.0101026	0.852757	0.890971	-0.0501367	-0.0165958	0.760439	0.816863	-0.0878506	-0.045075	0.407386	0.507514	-0.294552	-0.0408545	0.452738	0.554501	-0.256098	0.0330272	0.543907	0.718827	0.143375	-0.00382591	0.943965	0.966659	-0.0147267	0.0313028	0.565149	0.775591	0.110367	0.0289212	0.595122	0.81486
545	GO_COENZYME_BIOSYNTHETIC_PROCESS	103	0.0241571	0.657144	0.745062	0.127808	-0.182359	0.000728781	0.00409708	-2.38753	-0.105892	0.0510753	0.0975694	-1.01069	-0.0763361	0.160189	0.256465	-0.590972	0.0960793	0.0768629	0.137023	0.863206	0.0802729	0.139651	0.217096	0.663349	-0.172008	0.00145378	0.00470778	-2.32718	-0.164195	0.00238873	0.0073131	-2.1359	-0.0857652	0.114447	0.298441	-0.525141	-0.0654348	0.228819	0.403755	-0.393882	-0.117098	0.0308763	0.213716	-0.670162	-0.108964	0.0446663	0.250788
546	GO_COENZYME_METABOLIC_PROCESS	205	-0.0400739	0.461426	0.571142	-0.243256	-0.206437	0.000126147	0.00107262	-2.96956	-0.125226	0.020908	0.047719	-1.32131	-0.111944	0.0391087	0.0830942	-1.08043	0.113024	0.0372446	0.0773891	1.11132	0.106505	0.049738	0.0966825	1.01465	-0.189006	0.000458509	0.00177939	-2.74973	-0.181041	0.000797413	0.00293644	-2.53218	-0.105364	0.0522502	0.195994	-0.707758	-0.0976254	0.0722102	0.219096	-0.659366	-0.134409	0.0131193	0.143503	-0.84314	-0.127893	0.0183125	0.180574
547	GO_COFACTOR_BINDING	201	-0.0551366	0.310728	0.423155	-0.3735	-0.0399435	0.462886	0.582884	-0.234418	-0.0800931	0.140542	0.22086	-0.655884	-0.0743593	0.171324	0.269423	-0.569566	0.0101612	0.851913	0.890298	0.0504645	-0.0201484	0.711243	0.775106	-0.110639	-0.0728434	0.180245	0.262919	-0.580177	-0.0653943	0.229108	0.321187	-0.493242	0.0538073	0.322555	0.537997	0.26922	0.0168571	0.756784	0.849432	0.0708715	0.056447	0.299351	0.578543	0.237664	0.0540335	0.320522	0.618967
548	GO_COFACTOR_BIOSYNTHETIC_PROCESS	140	-0.00770985	0.887363	0.925381	-0.0336792	-0.176172	0.00110618	0.0056717	-2.24629	-0.121236	0.0253842	0.0558351	-1.25309	-0.0867517	0.110323	0.192846	-0.714789	0.112448	0.0382305	0.0792148	1.10119	0.0890074	0.101333	0.168256	0.77403	-0.176391	0.00109015	0.0037379	-2.42737	-0.16359	0.00248011	0.00755633	-2.12169	-0.0625056	0.25038	0.469795	-0.328092	-0.0413933	0.446795	0.608267	-0.215906	-0.108362	0.0458658	0.249614	-0.602732	-0.0958819	0.0774742	0.32783
549	GO_COFACTOR_METABOLIC_PROCESS	263	-0.0551034	0.31102	0.423423	-0.373226	-0.193151	0.000340698	0.00233226	-2.63222	-0.122437	0.023957	0.0533047	-1.27323	-0.116402	0.0318935	0.0703882	-1.1525	0.0975738	0.0723616	0.131056	0.882544	0.0902383	0.0966782	0.162229	0.789872	-0.180647	0.000819043	0.00291864	-2.53482	-0.172598	0.00139908	0.00468436	-2.32935	-0.100167	0.0650621	0.222396	-0.652873	-0.101466	0.0616402	0.203023	-0.692454	-0.110533	0.0416633	0.241582	-0.616936	-0.108118	0.0463594	0.256075
550	GO_COFACTOR_TRANSPORT	21	-0.188485	0.000485981	0.00181911	-2.74014	-0.223418	3.37359e-05	0.000436988	-3.35953	-0.131966	0.0149436	0.0360959	-1.44254	-0.1255	0.0206809	0.0494777	-1.30559	0.0967943	0.0746924	0.13422	0.872184	0.0906819	0.0950322	0.16021	0.79531	-0.20741	0.000120901	0.000575113	-3.24025	-0.199385	0.000221481	0.000994106	-3.00257	-0.135525	0.0124249	0.087787	-1.05657	-0.164613	0.00235379	0.0717186	-1.14437	-0.13304	0.0141395	0.150572	-0.822255	-0.13201	0.0149097	0.163633
551	GO_COFACTOR_TRANSPORTER_ACTIVITY	17	-0.230756	1.8215e-05	0.000105205	-3.97796	-0.240428	7.84265e-06	0.000151056	-3.82086	-0.144431	0.00768977	0.0210672	-1.67639	-0.13898	0.010346	0.0283889	-1.54685	0.131191	0.0155474	0.0392004	1.40671	0.126775	0.0194178	0.0453936	1.34301	-0.215753	6.28813e-05	0.000338474	-3.47047	-0.209698	0.000101309	0.000521254	-3.28295	-0.165432	0.0022369	0.0394799	-1.40362	-0.170879	0.00158523	0.0617074	-1.20966	-0.164205	0.00241399	0.0629057	-1.20131	-0.16051	0.00302729	0.0766338
552	GO_COGNITION	141	0.0574295	0.290846	0.400636	0.39725	0.0829208	0.126971	0.220667	0.656263	0.237484	1.01738e-05	0.000100156	3.99932	0.233135	1.48529e-05	0.000139699	3.85481	-0.213004	7.82114e-05	0.000627675	-3.20227	-0.198889	0.00022975	0.00138475	-2.85863	0.189307	0.000458704	0.00177939	2.74973	0.175479	0.00117601	0.00406058	2.39141	-0.119322	0.0278619	0.13699	-0.863311	-0.128357	0.0179445	0.131378	-0.881479	-0.0152355	0.779436	0.896392	-0.0475018	-0.0451662	0.406246	0.692582
553	GO_COLLAGEN_BINDING	50	-0.105583	0.0517936	0.0972639	-1.01205	-0.0767666	0.157766	0.258854	-0.586946	-0.0395105	0.46756	0.565927	-0.24724	-0.0871882	0.108511	0.190529	-0.720039	0.0175229	0.747373	0.808	0.0925887	0.0154386	0.776574	0.83017	0.0808329	-0.0890607	0.101111	0.163236	-0.787183	-0.0978654	0.071523	0.123479	-0.908407	-0.0948965	0.0805887	0.248267	-0.605081	-0.106283	0.0502545	0.187397	-0.727238	0.00631086	0.907654	0.9585	0.0184078	-0.0181501	0.738656	0.889439
554	GO_COLLAGEN_FIBRIL_ORGANIZATION	32	-0.0177544	0.744152	0.818623	-0.0869161	0.0178762	0.742459	0.818589	0.0869339	0.03324	0.541128	0.635513	0.196876	-0.000473544	0.993057	0.995304	-0.0020442	-0.0955532	0.0785071	0.139059	-0.856801	-0.060275	0.26757	0.363856	-0.43907	0.023701	0.663061	0.734897	0.133773	0.0179776	0.74105	0.803636	0.0949406	-0.0257958	0.635351	0.785764	-0.104708	-0.0443922	0.414343	0.577395	-0.238527	0.0613335	0.259247	0.545423	0.263266	0.0354764	0.514244	0.761323
555	GO_COLLAGEN_TRIMER	43	0.022164	0.683691	0.767939	0.114674	0.108714	0.0452007	0.0983975	1.00702	0.177294	0.00104321	0.00408251	2.38907	0.128958	0.017411	0.0430577	1.36595	-0.232248	1.60308e-05	0.000175784	-3.75502	-0.197408	0.000256195	0.00150958	-2.82114	0.164448	0.00237797	0.00708475	2.14968	0.150794	0.00537183	0.0143357	1.84358	-0.0321707	0.554224	0.725321	-0.13947	-0.0786669	0.147708	0.317953	-0.497636	0.099326	0.0673787	0.291457	0.535426	0.0626937	0.248816	0.546754
556	GO_COLUMNAR_CUBOIDAL_EPITHELIAL_CELL_DEVELOPMENT	29	-0.150889	0.00534261	0.0142052	-1.84755	-0.14451	0.00765606	0.0244707	-1.61135	-0.179346	0.000909764	0.00367389	-2.43487	-0.172583	0.00142046	0.00556871	-2.25425	0.129894	0.016607	0.0412613	1.38446	0.0888333	0.101988	0.169216	0.77156	-0.196353	0.000276753	0.00115771	-2.9364	-0.185429	0.000601284	0.00232434	-2.6337	-0.0416022	0.444308	0.646187	-0.189642	-0.0473208	0.384208	0.549764	-0.259824	-0.0626006	0.249521	0.535594	-0.271164	-0.0580896	0.285329	0.584512
557	GO_COLUMNAR_CUBOIDAL_EPITHELIAL_CELL_DIFFERENTIATION	61	-0.0948303	0.0808012	0.14137	-0.849642	-0.110165	0.0423943	0.0940916	-1.02645	-0.0272619	0.616253	0.706156	-0.151099	-0.0530293	0.329438	0.447123	-0.349573	-0.0165725	0.760646	0.817483	-0.0875214	0.00468811	0.931332	0.95262	0.0210802	-0.0780398	0.150972	0.226101	-0.645697	-0.0809741	0.136162	0.209516	-0.678783	-0.119323	0.0278607	0.13699	-0.863311	-0.117189	0.0307964	0.155385	-0.80859	-0.0875149	0.10719	0.35898	-0.44493	-0.0990549	0.0681327	0.310205
558	GO_COMPLEMENT_ACTIVATION	17	-0.129025	0.0173523	0.0388824	-1.41025	-0.0328782	0.545542	0.656191	-0.18297	-0.139314	0.0101624	0.0263273	-1.57959	-0.142294	0.00864838	0.0245578	-1.60981	0.0329072	0.545187	0.634905	0.197291	0.0310728	0.56783	0.654733	0.183936	-0.110552	0.0416707	0.0779565	-1.10815	-0.105236	0.0525722	0.0955662	-1.0197	0.0787499	0.14728	0.349465	0.456596	0.0281928	0.604258	0.734192	0.13419	0.0838429	0.122789	0.377889	0.422636	0.0664237	0.221725	0.516426
559	GO_COMPLEX_OF_COLLAGEN_TRIMERS	18	-0.00940523	0.862748	0.907185	-0.0423039	0.0783579	0.14931	0.249413	0.603082	0.110665	0.0414626	0.082664	1.08268	0.0504289	0.353731	0.471735	0.326302	-0.180592	0.000836676	0.00398975	-2.39905	-0.161525	0.00284605	0.0101066	-1.99539	0.0918266	0.090919	0.149562	0.825178	0.0862833	0.112238	0.179824	0.745153	0.00401581	0.94116	0.972327	0.0121876	-0.067798	0.212295	0.388449	-0.410665	0.103304	0.0570818	0.272492	0.564647	0.0740798	0.172858	0.465508
560	GO_CONDENSED_CHROMOSOME	165	0.358952	8.91061e-12	3.4548e-10	9.46158	0.184339	0.000635849	0.00371121	2.43048	0.183899	0.000655496	0.00279485	2.55364	0.200014	0.000205563	0.00110515	2.95658	-0.0947261	0.0811321	0.142852	-0.845114	-0.105008	0.0530544	0.100991	-0.995717	0.213233	7.40116e-05	0.000383924	3.41575	0.207932	0.00011235	0.000566224	3.24701	0.0753775	0.165519	0.373345	0.42789	0.104458	0.0543189	0.192803	0.714886	0.0736155	0.175659	0.449031	0.347724	0.0837627	0.123188	0.400971
561	GO_CONDENSED_CHROMOSOME_CENTROMERIC_REGION	92	0.366981	2.80531e-12	1.61396e-10	9.79211	0.182785	0.000707769	0.0040139	2.39643	0.169973	0.00165786	0.0060101	2.22112	0.193047	0.00034329	0.00168227	2.7741	-0.0848115	0.118547	0.192247	-0.71614	-0.0967899	0.0746951	0.132095	-0.879112	0.203147	0.000162301	0.000736672	3.13273	0.199131	0.000219592	0.000989616	3.00453	0.0780945	0.150751	0.353584	0.451507	0.105983	0.0508751	0.18759	0.72679	0.0787363	0.147413	0.413055	0.383992	0.091397	0.0924538	0.349775
562	GO_CONDENSED_NUCLEAR_CHROMOSOME	62	0.301963	1.58704e-08	2.19437e-07	6.65869	0.183972	0.000664785	0.00382467	2.41741	0.190863	0.000410865	0.00187625	2.72671	0.201803	0.000184997	0.00101302	2.99438	-0.118612	0.0288116	0.0631859	-1.19938	-0.105769	0.0513802	0.0987348	-1.00553	0.221081	4.08797e-05	0.000235526	3.62796	0.215994	6.16826e-05	0.000348094	3.4583	0.0706667	0.193548	0.409269	0.387991	0.0849518	0.117902	0.28293	0.548321	0.0646062	0.234651	0.516651	0.286803	0.0648825	0.232652	0.529896
563	GO_CONDENSED_NUCLEAR_CHROMOSOME_CENTROMERIC_REGION	15	0.321195	1.66764e-09	3.11714e-08	7.50624	0.178262	0.000978125	0.00513564	2.28941	0.151254	0.00523177	0.0154203	1.81191	0.176947	0.00106746	0.00436724	2.35979	-0.0959404	0.0773006	0.137472	-0.861787	-0.0974917	0.0726162	0.129141	-0.888937	0.191844	0.00038315	0.00151685	2.81906	0.190042	0.00043551	0.00177001	2.75202	0.0755307	0.16458	0.372097	0.429344	0.099116	0.0679623	0.214592	0.668386	0.0683167	0.208812	0.487034	0.31244	0.0742398	0.17193	0.464422
564	GO_CONNECTIVE_TISSUE_DEVELOPMENT	130	-0.0625581	0.249842	0.356343	-0.448131	0.0344698	0.526258	0.640826	0.19326	0.0256801	0.636869	0.722862	0.140945	0.00803376	0.882605	0.916536	0.0378506	-0.0794106	0.143908	0.223991	-0.649769	-0.0899214	0.0978464	0.164003	-0.785149	0.0298965	0.582582	0.666884	0.17595	0.0275559	0.612453	0.695697	0.15758	-0.0413745	0.446808	0.648058	-0.188386	-0.0375534	0.489911	0.645226	-0.190288	0.0372945	0.49291	0.722961	0.140885	0.0182621	0.737102	0.889109
565	GO_CONTRACTILE_FIBER	124	0.125256	0.0209311	0.0456773	1.3403	0.137202	0.011374	0.0333246	1.47723	0.122366	0.0240934	0.0535005	1.27164	0.0768035	0.157566	0.253272	0.596413	-0.152058	0.00499454	0.0159869	-1.79624	-0.193252	0.000346415	0.00189928	-2.72141	0.122536	0.0238964	0.0489168	1.31054	0.130134	0.0164068	0.0364505	1.4383	0.0253176	0.641633	0.789776	0.102496	-0.00652642	0.904515	0.944736	-0.0246894	0.114024	0.0356347	0.228115	0.641846	0.0944034	0.0821808	0.334307
566	GO_COP9_SIGNALOSOME	27	0.156083	0.0039467	0.010948	1.96067	0.0623514	0.251413	0.369897	0.431919	0.128104	0.0181732	0.0425515	1.37109	0.130093	0.0164409	0.0412501	1.38457	-0.0780917	0.1507	0.232938	-0.632759	-0.0509476	0.348797	0.44671	-0.349974	0.0963932	0.0759087	0.128723	0.890343	0.085996	0.113441	0.181163	0.741931	-0.0393658	0.469193	0.666113	-0.176452	-0.0288617	0.595704	0.727189	-0.138353	-0.0125237	0.817935	0.917703	-0.0372977	-0.0210707	0.698512	0.870977
567	GO_COPI_COATED_VESICLE	20	0.0365648	0.501415	0.610742	0.214142	-0.165987	0.00216075	0.00931142	-2.03098	-0.0350761	0.519004	0.615085	-0.211065	-0.0284029	0.601566	0.702039	-0.153639	0.0362357	0.505276	0.601067	0.221077	0.0857374	0.114534	0.185515	0.73162	-0.115074	0.033963	0.0659605	-1.18072	-0.11907	0.0281961	0.0568543	-1.24524	-0.129646	0.0168171	0.103229	-0.986197	-0.131254	0.0154976	0.124826	-0.903695	-0.115227	0.0337236	0.224028	-0.649697	-0.110733	0.041337	0.243494
568	GO_COPI_COATED_VESICLE_MEMBRANE	16	0.00826396	0.879267	0.920187	0.0361239	-0.217899	5.29337e-05	0.000595169	-3.22536	-0.0800264	0.140817	0.221135	-0.655343	-0.070257	0.196149	0.300256	-0.522508	0.083725	0.123317	0.198149	0.703009	0.143686	0.00801248	0.0225941	1.64601	-0.173048	0.00137827	0.00451942	-2.34492	-0.176159	0.00112449	0.00391013	-2.40781	-0.143343	0.00816508	0.0709242	-1.14921	-0.138795	0.0104492	0.106061	-0.974443	-0.149837	0.00567455	0.0927611	-1.03263	-0.143185	0.00823621	0.125815
569	GO_COPPER_ION_BINDING	33	-0.0241739	0.656763	0.74506	-0.127809	-0.0409424	0.451571	0.572541	-0.242193	-0.0424251	0.435345	0.536163	-0.270703	-0.0445467	0.412719	0.530953	-0.274944	0.0355179	0.513751	0.608697	0.215599	0.0356868	0.511751	0.603422	0.219379	-0.0601077	0.268903	0.364516	-0.438283	-0.0613885	0.25882	0.35389	-0.451132	-0.0172076	0.75177	0.860108	-0.0654468	-0.0223307	0.681441	0.794645	-0.0998266	0.0434891	0.42391	0.680484	0.167182	0.0344631	0.526339	0.767505
570	GO_COPPER_ION_HOMEOSTASIS	15	0.0129353	0.812061	0.869995	0.0604831	-0.0620889	0.253418	0.372352	-0.429047	-0.0819081	0.13169	0.210457	-0.676836	-0.0590186	0.277685	0.393394	-0.405172	0.104479	0.0543015	0.10468	0.980135	0.100633	0.0638382	0.117054	0.931613	-0.0907457	0.094799	0.15491	-0.809922	-0.082004	0.131238	0.20321	-0.692055	-0.0118731	0.82724	0.909349	-0.0412696	0.0185454	0.733177	0.832387	0.0796749	-0.0373974	0.491717	0.722753	-0.14101	-0.0222077	0.683101	0.863131
571	GO_COPPER_ION_TRANSPORT	17	-0.169817	0.0016967	0.00533456	-2.2729	-0.214127	7.15665e-05	0.000730506	-3.13638	-0.177463	0.00103152	0.00404393	-2.3932	-0.15437	0.00436545	0.0140474	-1.8524	0.194186	0.000323874	0.0019207	2.71654	0.207529	0.000119799	0.000846427	3.07241	-0.2269	2.52439e-05	0.00015597	-3.80696	-0.222551	3.6237e-05	0.000222312	-3.65304	-0.0597621	0.271669	0.489366	-0.310366	-0.0270695	0.618744	0.746489	-0.126977	-0.0934954	0.085179	0.319586	-0.495412	-0.0751732	0.166592	0.457818
572	GO_CORE_PROMOTER_BINDING	122	0.102928	0.0579667	0.107131	0.970086	0.110987	0.040826	0.091297	1.03954	0.201186	0.000188251	0.000982273	3.00777	0.177559	0.00100855	0.00417561	2.37928	-0.134206	0.013259	0.0347969	-1.45846	-0.1028	0.0582822	0.108864	-0.963115	0.195296	0.000291462	0.00120721	2.91822	0.178557	0.000943298	0.00337273	2.47202	-0.12676	0.0193783	0.110578	-0.956331	-0.0854807	0.115658	0.280134	-0.552635	-0.0350628	0.519352	0.74361	-0.128654	-0.0636258	0.241974	0.539207
573	GO_CORE_PROMOTER_PROXIMAL_REGION_DNA_BINDING	251	0.115357	0.0334747	0.0677136	1.16932	0.222286	3.5416e-05	0.000451528	3.34532	0.235686	1.12386e-05	0.000108233	3.96564	0.222847	3.38019e-05	0.000258176	3.58808	-0.186137	0.000561106	0.00293667	-2.53215	-0.191705	0.000378155	0.00202388	-2.69381	0.267461	5.58476e-07	7.17388e-06	5.14425	0.257164	1.54388e-06	1.76728e-05	4.75269	0.00960065	0.859996	0.927631	0.0326246	0.0289329	0.594973	0.727098	0.138407	0.0609425	0.262446	0.548059	0.261173	0.0322612	0.553295	0.788895
574	GO_CORE_PROMOTER_SEQUENCE_SPECIFIC_DNA_BINDING	79	-0.0144481	0.790564	0.854612	-0.0682312	0.0395639	0.466958	0.586844	0.231478	0.131516	0.015292	0.0367572	1.43466	0.0964426	0.0757578	0.142146	0.847265	-0.0753457	0.165619	0.250663	-0.600909	-0.0330867	0.542996	0.631988	-0.199291	0.112159	0.038778	0.0737597	1.13218	0.0987184	0.069078	0.119865	0.921307	-0.128061	0.0182127	0.108347	-0.965185	-0.0880553	0.105033	0.266682	-0.574007	-0.0722003	0.184038	0.454706	-0.342269	-0.0983157	0.0702236	0.314551
575	GO_CORECEPTOR_ACTIVITY	22	0.142833	0.00839696	0.0208045	1.68184	0.183794	0.000672951	0.00386162	2.41323	0.253315	2.4167e-06	2.95745e-05	4.52908	0.233801	1.40238e-05	0.000133317	3.87511	-0.281832	1.42329e-07	3.94074e-06	-5.40442	-0.286637	8.55813e-08	2.6699e-06	-5.57351	0.248866	3.65414e-06	3.10112e-05	4.50848	0.237905	9.80418e-06	7.55131e-05	4.12198	-0.0216731	0.690331	0.821646	-0.0853151	-0.0611677	0.260539	0.431633	-0.364886	0.108771	0.0450879	0.247624	0.606207	0.0805736	0.138115	0.41793
576	GO_CORONARY_VASCULATURE_DEVELOPMENT	31	0.0667861	0.21921	0.318706	0.496609	0.079585	0.143028	0.241652	0.616809	0.196997	0.000264029	0.00130251	2.88522	0.16709	0.0020165	0.00738151	2.13185	-0.242279	6.64824e-06	8.31969e-05	-4.07989	-0.203181	0.000166804	0.00108191	-2.96581	0.168663	0.00182586	0.00569616	2.24442	0.160779	0.00297827	0.00880758	2.05514	-0.0841537	0.121404	0.309268	-0.509664	-0.114011	0.0356556	0.162878	-0.788137	0.0226809	0.676725	0.837583	0.076972	-0.0117412	0.82913	0.927069
577	GO_CORTICAL_ACTIN_CYTOSKELETON	43	0.165994	0.00215981	0.00655788	2.18324	0.0239196	0.660147	0.75256	0.123459	0.00623148	0.908811	0.936504	0.0284903	0.022233	0.682759	0.76631	0.115596	-0.0475782	0.381625	0.481652	-0.317267	-0.0840459	0.121883	0.195559	-0.708721	-0.0071691	0.895163	0.9203	-0.0360705	0.00320398	0.95304	0.965683	0.0151653	0.00745732	0.890974	0.945936	0.0241384	-0.0290074	0.593849	0.726727	-0.138629	0.0724968	0.18224	0.453552	0.343373	0.0777772	0.152355	0.439695
578	GO_CORTICAL_CYTOSKELETON	57	0.144743	0.00755778	0.0190125	1.72096	0.037166	0.494402	0.613163	0.212424	0.046552	0.391986	0.49571	0.304772	0.0400048	0.462006	0.576693	0.239055	-0.0737568	0.174743	0.261612	-0.582342	-0.1148	0.0343916	0.072206	-1.14143	0.0237624	0.662242	0.734897	0.133773	0.0298333	0.58338	0.670743	0.173444	-0.0276121	0.611728	0.769437	-0.113827	-0.0702219	0.196373	0.371103	-0.430506	0.073507	0.17621	0.449402	0.347365	0.0727141	0.18093	0.473645
579	GO_CORTICAL_CYTOSKELETON_ORGANIZATION	29	0.229565	2.01583e-05	0.000114931	3.93956	0.282848	1.27924e-07	1.03221e-05	4.98623	0.300827	1.80408e-08	7.00577e-07	6.15454	0.290943	5.3822e-08	2.36071e-06	5.62696	-0.272804	3.6109e-07	7.91895e-06	-5.10133	-0.283789	1.15823e-07	3.44361e-06	-5.46299	0.322096	1.49475e-09	7.19755e-08	7.14282	0.311908	5.04815e-09	2.12984e-07	6.67165	0.033083	0.54304	0.717896	0.143939	0.000668945	0.990192	0.995134	0.00211854	0.156177	0.00392473	0.0772735	1.11197	0.128872	0.0174864	0.176056
580	GO_COSTAMERE	17	0.00310444	0.954497	0.972722	0.0120112	-0.00644703	0.905671	0.93739	-0.0280795	0.153084	0.00470602	0.0140863	1.8512	0.117708	0.0300583	0.0671519	1.17294	-0.0855685	0.115251	0.187776	-0.72636	-0.116981	0.0310965	0.0662822	-1.1786	0.0803815	0.139059	0.211622	0.674439	0.0741055	0.172709	0.254609	0.594126	-0.144042	0.00785672	0.0696106	-1.15732	-0.152215	0.00494931	0.0818114	-1.08719	-0.0584391	0.282436	0.562547	-0.249841	-0.0750758	0.167143	0.458461
581	GO_COVALENT_CHROMATIN_MODIFICATION	297	0.28762	6.72302e-08	7.63667e-07	6.1171	0.282507	1.16889e-07	1.0199e-05	4.99144	0.269786	4.41276e-07	8.24832e-06	5.08363	0.27798	1.88983e-07	5.97997e-06	5.2233	-0.24275	5.96821e-06	7.6858e-05	-4.11431	-0.24797	3.69259e-06	5.16497e-05	-4.28693	0.327544	6.058e-10	3.65004e-08	7.4377	0.32102	1.37301e-09	8.56682e-08	7.06718	0.0877061	0.106445	0.287182	0.541842	0.0712083	0.190248	0.365323	0.437323	0.143095	0.00823114	0.109501	0.960581	0.118094	0.0294693	0.21258
582	GO_CRANIAL_NERVE_DEVELOPMENT	24	0.000199981	0.997069	0.998196	0.000784188	0.118755	0.0286173	0.0688992	1.16179	0.215919	6.2057e-05	0.000401332	3.3965	0.203942	0.000157501	0.000893378	3.04896	-0.163093	0.00258546	0.00960001	-2.01773	-0.140778	0.00939154	0.0256501	-1.59091	0.189021	0.00046804	0.00180769	2.74288	0.174151	0.00128279	0.00436463	2.36005	-0.0589255	0.278445	0.496582	-0.304009	-0.0499816	0.35802	0.525524	-0.279408	0.00552742	0.919076	0.962531	0.0165851	-0.0175758	0.746638	0.89208
583	GO_CRANIAL_SKELETAL_SYSTEM_DEVELOPMENT	46	0.0105053	0.846882	0.895878	0.0477509	-0.0283482	0.602266	0.705271	-0.151644	0.0601184	0.268817	0.371171	0.430426	0.0614315	0.258485	0.372872	0.42844	-0.0752119	0.166373	0.251547	-0.599382	-0.0508087	0.350114	0.448138	-0.348589	0.0224263	0.680153	0.747052	0.126649	0.0186218	0.73212	0.796291	0.0989282	-0.107216	0.0482614	0.187812	-0.726277	-0.0885792	0.102974	0.264006	-0.578387	-0.0697987	0.199088	0.473155	-0.324997	-0.0862286	0.112466	0.382147
584	GO_CUL3_RING_UBIQUITIN_LIGASE_COMPLEX	39	-0.103371	0.0569183	0.105546	-0.97656	-0.0534509	0.325602	0.44765	-0.349062	-0.0823084	0.129809	0.208051	-0.68183	-0.0822107	0.130266	0.219172	-0.659215	0.0414087	0.446432	0.543323	0.264942	-0.000660397	0.990317	0.994132	-0.00255589	-0.0801672	0.140118	0.212723	-0.672186	-0.0648159	0.233132	0.325268	-0.487759	0.00235886	0.965418	0.984732	0.00668209	-0.00916342	0.866243	0.919976	-0.0362235	-0.0364449	0.502821	0.731879	-0.135561	-0.021216	0.696535	0.870977
585	GO_CUL4_RING_E3_UBIQUITIN_LIGASE_COMPLEX	26	0.0520406	0.338543	0.451694	0.345156	0.0642847	0.236991	0.353611	0.451474	0.0611158	0.260944	0.362149	0.441112	0.0581179	0.285093	0.401323	0.396506	0.037206	0.493938	0.591071	0.228361	0.0736817	0.175183	0.260336	0.584466	0.0724726	0.182386	0.265169	0.576478	0.0576911	0.288651	0.387726	0.411475	0.0266803	0.623799	0.776468	0.109877	0.0583137	0.283472	0.4534	0.343519	0.00492351	0.927893	0.968331	0.0139763	-0.00554422	0.918831	0.965669
586	GO_CULLIN_RING_UBIQUITIN_LIGASE_COMPLEX	119	0.0842143	0.121173	0.196556	0.706513	0.0955833	0.0784061	0.151083	0.820785	0.0209544	0.700238	0.775707	0.110302	0.0446219	0.412122	0.530418	0.275381	-0.0597365	0.272025	0.370905	-0.430737	-0.0871407	0.108729	0.178199	-0.749095	0.0606784	0.264524	0.35946	0.444349	0.0693253	0.202266	0.290074	0.537491	0.0910112	0.0938436	0.269079	0.57012	0.0689219	0.20491	0.379813	0.42043	0.0922673	0.0893787	0.326638	0.485934	0.084606	0.119446	0.392788
587	GO_CYCLIC_NUCLEOTIDE_BINDING	18	-0.0371688	0.49437	0.603489	-0.219331	-0.00209813	0.969239	0.980277	-0.00865138	0.0487625	0.369877	0.474668	0.32361	0.0278368	0.608833	0.708094	0.149909	-0.0775155	0.153742	0.236321	-0.626499	-0.0950449	0.0801145	0.139453	-0.855573	0.0225729	0.67818	0.745863	0.127341	0.022019	0.68565	0.756952	0.120932	-0.0693917	0.201725	0.418574	-0.378228	-0.0867034	0.110495	0.27438	-0.561647	-0.000875338	0.987165	0.994888	-0.00222601	-0.0169349	0.755577	0.895933
588	GO_CYCLIC_NUCLEOTIDE_MEDIATED_SIGNALING	29	-0.0977628	0.0718218	0.127933	-0.893016	-0.0782868	0.14968	0.249687	-0.602605	0.0683347	0.208692	0.302027	0.519954	0.0248838	0.647355	0.740838	0.130277	-0.11689	0.0312284	0.0671563	-1.17291	-0.122059	0.0244518	0.0545663	-1.26308	-0.0174307	0.748658	0.80538	-0.0939993	-0.0213366	0.694896	0.764058	-0.116874	-0.169026	0.00178428	0.035856	-1.44544	-0.183529	0.000685254	0.0548696	-1.26067	-0.0809436	0.13631	0.396749	-0.401484	-0.104293	0.054735	0.274501
589	GO_CYCLIC_NUCLEOTIDE_METABOLIC_PROCESS	28	-0.144758	0.00755164	0.0190078	-1.72107	-0.0245831	0.651334	0.746162	-0.127167	0.0052386	0.923292	0.94724	0.02354	-0.0276414	0.61135	0.709532	-0.149028	-0.0819704	0.131396	0.208194	-0.681533	-0.0774389	0.15415	0.234911	-0.629096	-0.0195154	0.719793	0.780201	-0.107794	-0.0236641	0.663554	0.739136	-0.131276	-0.0774084	0.154313	0.357723	-0.446454	-0.119639	0.0274479	0.148499	-0.828275	0.0305532	0.574324	0.781635	0.106996	0.00807039	0.882074	0.954967
590	GO_CYCLIN_BINDING	17	0.0692207	0.20284	0.299073	0.524222	0.0966591	0.0751007	0.145728	0.836458	0.0152978	0.778558	0.841428	0.0749831	0.0217958	0.688669	0.770405	0.113281	-0.00472353	0.930814	0.951843	-0.0214346	-0.0460467	0.39715	0.493514	-0.306701	0.0446426	0.411714	0.512329	0.290451	0.0498054	0.359719	0.464729	0.332801	0.0550822	0.311039	0.527536	0.277748	0.04952	0.362482	0.529965	0.275753	0.0563346	0.300153	0.579365	0.237048	0.0563309	0.300184	0.601726
591	GO_CYCLIN_DEPENDENT_PROTEIN_KINASE_ACTIVITY	30	0.257104	1.68916e-06	1.26189e-05	4.89898	0.189566	0.000450385	0.00286256	2.54324	0.202978	0.000169375	0.000905102	3.0433	0.194632	0.000313608	0.00155227	2.80903	-0.166593	0.00208041	0.00814919	-2.08889	-0.110281	0.0421764	0.0848893	-1.07115	0.23184	1.66023e-05	0.000107547	3.9684	0.229408	2.04297e-05	0.000136506	3.86485	0.0695025	0.201005	0.418082	0.378738	0.0779301	0.151548	0.322826	0.491032	0.0902948	0.0964565	0.342116	0.465827	0.0885646	0.103031	0.36743
592	GO_CYCLIN_DEPENDENT_PROTEIN_KINASE_HOLOENZYME_COMPLEX	28	0.0436277	0.422433	0.532398	0.273763	0.0100736	0.853101	0.900891	0.0453276	0.0353063	0.516264	0.613136	0.212443	0.0578163	0.287604	0.403589	0.39406	0.033406	0.539108	0.629314	0.201133	0.0277968	0.609348	0.690563	0.160797	0.0321921	0.55396	0.643262	0.191612	0.0264464	0.626845	0.707316	0.150386	-0.080296	0.139481	0.338696	-0.47019	-0.0313272	0.564664	0.706228	-0.151055	-0.0568414	0.29582	0.575025	-0.240313	-0.0521664	0.337376	0.632491
593	GO_CYCLIN_DEPENDENT_PROTEIN_SERINE_THREONINE_KINASE_REGULATOR_ACTIVITY	24	0.0228672	0.674222	0.758457	0.120069	0.00249198	0.963468	0.977143	0.0100417	1.19073e-05	0.999828	0.999828	7.48755e-05	0.0290987	0.592688	0.694421	0.158377	0.0618144	0.255525	0.353743	0.451312	0.0808804	0.136617	0.213372	0.670862	0.0141156	0.795276	0.840628	0.0753963	0.0032568	0.952267	0.965341	0.0153191	-0.0422034	0.437749	0.641036	-0.193117	0.00278295	0.959206	0.976622	0.0102737	-0.0565007	0.298728	0.577637	-0.238345	-0.053486	0.325284	0.622779
594	GO_CYSTEINE_TYPE_ENDOPEPTIDASE_ACTIVITY	66	-0.121383	0.0252591	0.0535396	-1.27133	-0.158248	0.0034694	0.0133647	-1.87404	-0.0992646	0.0675487	0.122539	-0.911725	-0.0976135	0.0722583	0.137148	-0.862809	0.128597	0.01773	0.0434666	1.36184	0.114802	0.0343882	0.072206	1.14143	-0.160069	0.00310928	0.00887508	-2.05183	-0.164431	0.00238049	0.00729294	-2.1371	-0.0960079	0.0770919	0.242382	-0.615499	-0.0645372	0.235152	0.409509	-0.387737	-0.119845	0.0271811	0.203743	-0.690917	-0.131658	0.0151813	0.163633
595	GO_CYSTEINE_TYPE_ENDOPEPTIDASE_INHIBITOR_ACTIVITY	23	-0.0569953	0.294513	0.40471	-0.392857	-0.106503	0.0497777	0.106126	-0.974178	-0.0931623	0.0863007	0.14905	-0.826669	-0.0603696	0.266819	0.380679	-0.419442	0.141659	0.00895265	0.0256038	1.5917	0.0943308	0.0824175	0.1429	0.844968	-0.116258	0.0321579	0.0628961	-1.20138	-0.120023	0.0269524	0.0547703	-1.26145	-0.0667297	0.2196	0.437769	-0.358755	-0.0158938	0.770168	0.857679	-0.0666754	-0.0615234	0.257773	0.543852	-0.264519	-0.0474029	0.383383	0.672628
596	GO_CYSTEINE_TYPE_ENDOPEPTIDASE_REGULATOR_ACTIVITY_INVOLVED_IN_APOPTOTIC_PROCESS	33	-0.0767699	0.157748	0.243663	-0.613211	-0.0868298	0.109975	0.196527	-0.706578	-0.113635	0.0362712	0.0742178	-1.12949	-0.0895074	0.099406	0.178071	-0.749408	0.148002	0.00629789	0.019184	1.71706	0.103985	0.0554566	0.104453	0.98108	-0.122527	0.0239063	0.0489168	-1.31054	-0.116849	0.031287	0.0620418	-1.20732	-0.0276649	0.611047	0.769235	-0.113941	0.0445592	0.412588	0.576048	0.239542	-0.0934679	0.0852711	0.319586	-0.495412	-0.0813588	0.134306	0.412318
597	GO_CYSTEINE_TYPE_PEPTIDASE_ACTIVITY	134	-0.192178	0.0003655	0.00141535	-2.84914	-0.0829956	0.12667	0.220232	-0.65712	-0.0315455	0.562136	0.654127	-0.184338	-0.0619324	0.254759	0.36906	-0.432904	0.0623904	0.251256	0.349362	0.456725	0.080378	0.139131	0.216586	0.664369	-0.0855371	0.115417	0.181505	-0.741113	-0.093787	0.0842061	0.142488	-0.846222	-0.0647648	0.233631	0.453742	-0.343191	-0.0551492	0.310617	0.480626	-0.318192	-0.100577	0.0639665	0.284509	-0.545903	-0.122128	0.0243177	0.198028
598	GO_CYTOCHROME_COMPLEX	16	0.045589	0.401863	0.513057	0.289834	-0.0571574	0.29314	0.41435	-0.382633	-0.100283	0.0647704	0.118616	-0.925856	-0.0650211	0.231654	0.341962	-0.466023	0.130176	0.0163715	0.0408597	1.3887	0.120766	0.0260159	0.0571396	1.24306	-0.101329	0.062018	0.10855	-0.964371	-0.101326	0.0620243	0.10948	-0.960664	0.0156224	0.773986	0.875752	0.057619	0.0396873	0.46557	0.625125	0.204033	-0.00367996	0.946073	0.974723	-0.0111189	0.0056694	0.917005	0.965669
599	GO_CYTOCHROME_COMPLEX_ASSEMBLY	16	-0.000144719	0.99788	0.998331	-0.000725654	0.0207953	0.702263	0.787004	0.104023	-0.0909002	0.0942365	0.159766	-0.796517	-0.0296018	0.586305	0.689313	-0.161584	0.103393	0.0568661	0.108351	0.965165	0.0435043	0.423747	0.52101	0.283154	-0.0492415	0.365189	0.466544	-0.331108	-0.0391044	0.472151	0.573678	-0.241332	0.0882177	0.104391	0.283651	0.547216	0.0998429	0.0659601	0.210521	0.676705	0.0533236	0.326757	0.605138	0.218146	0.0672475	0.216037	0.512738
600	GO_CYTOKINE_ACTIVITY	70	-0.271236	4.23047e-07	3.73326e-06	-5.42791	-0.0940673	0.0832806	0.158476	-0.800035	-0.154678	0.00428751	0.0130272	-1.88515	-0.132242	0.0147333	0.0377057	-1.42359	0.174227	0.00127644	0.00557352	2.25387	0.141432	0.00906393	0.0249089	1.60364	-0.148396	0.00615893	0.0157803	-1.80189	-0.149963	0.00563363	0.0149443	-1.82552	-0.055498	0.307396	0.524714	-0.280077	-0.00727627	0.893605	0.938377	-0.0276228	-0.0984586	0.0698154	0.295116	-0.530007	-0.110051	0.0426092	0.246877
601	GO_CYTOKINE_BINDING	50	-0.0848263	0.118448	0.192842	-0.714799	0.010221	0.850976	0.899415	0.0460401	0.0893676	0.0999372	0.167317	0.776459	0.0679357	0.211367	0.318271	0.497203	-0.0764039	0.159744	0.243351	-0.613767	-0.0646056	0.234655	0.327089	-0.485334	0.0579277	0.286675	0.383445	0.416297	0.0455069	0.402712	0.506146	0.295724	-0.107468	0.0477344	0.186857	-0.72849	-0.101424	0.0617712	0.203153	-0.692178	-0.042462	0.434945	0.688637	-0.162009	-0.0645705	0.23491	0.530729
602	GO_CYTOKINE_MEDIATED_SIGNALING_PATHWAY	252	-0.282868	1.27649e-07	1.32123e-06	-5.87902	-0.132809	0.0143096	0.0396941	-1.40127	-0.164425	0.00238131	0.0081398	-2.08939	-0.178993	0.000931562	0.00389323	-2.40969	0.167955	0.00190951	0.00765532	2.11604	0.157199	0.00369369	0.0123775	1.90737	-0.174828	0.00122731	0.00410339	-2.38686	-0.178974	0.000932724	0.00334168	-2.47604	-0.0938108	0.0841277	0.254396	-0.594489	-0.0662576	0.222885	0.39878	-0.399267	-0.0785386	0.148371	0.414168	-0.382823	-0.0896842	0.0987376	0.362092
603	GO_CYTOKINE_PRODUCTION	66	-0.236398	1.11895e-05	6.8561e-05	-4.16392	-0.146752	0.00675676	0.0223044	-1.65161	-0.0956268	0.0782766	0.137935	-0.860324	-0.131454	0.0153401	0.039033	-1.40857	0.099181	0.0677811	0.124542	0.904685	0.122471	0.0239709	0.0538051	1.26918	-0.151327	0.00520965	0.0137537	-1.86158	-0.164103	0.00242936	0.00742007	-2.12959	-0.104666	0.0538693	0.199434	-0.700202	-0.0965064	0.0755636	0.223313	-0.651085	-0.0903082	0.0964068	0.342116	-0.465827	-0.0948693	0.0806758	0.331759
604	GO_CYTOKINE_RECEPTOR_ACTIVITY	33	-0.203757	0.000159712	0.000685584	-3.16394	-0.15088	0.00534533	0.0187044	-1.72806	-0.0977011	0.0720018	0.129032	-0.889301	-0.0723227	0.183294	0.28441	-0.546055	0.101042	0.0627646	0.117122	0.931362	0.0776319	0.153124	0.233588	0.631549	-0.126999	0.0192034	0.0409587	-1.38765	-0.132414	0.0146037	0.0331426	-1.47961	-0.152203	0.00495281	0.0555064	-1.25566	-0.112911	0.0374835	0.164879	-0.782834	-0.148057	0.00627837	0.0979337	-1.00907	-0.153528	0.00458581	0.0923415
605	GO_CYTOKINE_RECEPTOR_BINDING	130	-0.271584	4.08464e-07	3.63352e-06	-5.43967	-0.0515048	0.343545	0.466699	-0.330963	-0.0623582	0.251362	0.351272	-0.454356	-0.0543568	0.317461	0.434865	-0.361645	0.0972743	0.0732583	0.132355	0.87826	0.0526226	0.333164	0.431836	0.364681	-0.0643424	0.23657	0.328117	-0.483972	-0.0685048	0.207559	0.296079	-0.528592	-0.102976	0.0578781	0.207938	-0.682066	-0.0617539	0.255991	0.426652	-0.369926	-0.107504	0.0476601	0.252787	-0.597245	-0.122852	0.0235342	0.194686
606	GO_CYTOKINE_SECRETION	18	-0.268425	5.60628e-07	4.74873e-06	-5.32342	-0.256888	1.72433e-06	5.53536e-05	-4.25685	-0.135879	0.0121961	0.0303702	-1.51755	-0.145465	0.00726077	0.021358	-1.67044	0.206699	0.000127684	0.000927278	3.03279	0.266799	6.58915e-07	1.30312e-05	4.88502	-0.21055	9.48148e-05	0.000476524	-3.32192	-0.223091	3.46575e-05	0.00021324	-3.67113	-0.148099	0.00626332	0.0622119	-1.20613	-0.0860457	0.113232	0.276984	-0.557545	-0.214438	6.98236e-05	0.0123437	-1.90855	-0.204175	0.000154749	0.0253903
607	GO_CYTOKINESIS	79	0.39224	5.96005e-14	1.03185e-11	10.9864	0.266634	6.06965e-07	2.9924e-05	4.52398	0.23801	9.14612e-06	9.10502e-05	4.04072	0.253738	2.14516e-06	3.52508e-05	4.45283	-0.164182	0.00239065	0.00906726	-2.04252	-0.197173	0.000253911	0.00150177	-2.8234	0.29003	5.16043e-08	1.08345e-06	5.96519	0.285541	8.42944e-08	1.80398e-06	5.74377	0.10297	0.0578641	0.207938	0.682066	0.115403	0.0334037	0.158543	0.799854	0.131329	0.0153854	0.156042	0.80676	0.132839	0.0142348	0.160212
608	GO_CYTOPLASMIC_EXOSOME_RNASE_COMPLEX_	15	0.214207	7.1114e-05	0.00034355	3.46401	0.0987758	0.068916	0.136111	0.866106	0.0997782	0.0661363	0.120661	0.918434	0.138334	0.0107093	0.0291953	1.53469	-0.000607272	0.991096	0.992907	-0.00309123	-0.00511464	0.925101	0.948218	-0.0230917	0.123108	0.0232438	0.0478262	1.32033	0.123131	0.0232183	0.0483351	1.31574	0.0652373	0.230104	0.448679	0.348065	0.115257	0.0336772	0.158882	0.798926	0.00170091	0.975061	0.987996	0.00524468	0.0187323	0.730592	0.886975
609	GO_CYTOPLASMIC_MICROTUBULE	46	0.300537	1.58203e-08	2.19437e-07	6.65869	0.150308	0.00548417	0.0190698	1.71965	0.144586	0.00757907	0.0208792	1.68029	0.196926	0.000258584	0.00132762	2.87693	-0.138425	0.0106085	0.0293172	-1.53288	-0.149645	0.00569692	0.0173175	-1.76151	0.173434	0.00132478	0.00437969	2.35856	0.175091	0.00118814	0.00408971	2.38831	0.00978718	0.857305	0.925737	0.0335122	0.00235642	0.96547	0.980072	0.00874218	0.0604038	0.266696	0.550391	0.259329	0.0607334	0.26409	0.563286
610	GO_CYTOPLASMIC_MICROTUBULE_ORGANIZATION	36	0.161734	0.00281001	0.00817893	2.0873	0.18205	0.000758013	0.00422922	2.37374	0.213816	7.33503e-05	0.000457021	3.34006	0.222927	3.51303e-05	0.000266458	3.57437	-0.190718	0.000415117	0.00229651	-2.63893	-0.196813	0.000267614	0.00156197	-2.80633	0.234698	1.29751e-05	8.81589e-05	4.05473	0.231067	1.77375e-05	0.000121636	3.91494	0.0043831	0.935789	0.968586	0.013862	-0.00887154	0.870465	0.922086	-0.0352288	0.0443107	0.415201	0.67399	0.171346	0.025822	0.635007	0.832745
611	GO_CYTOPLASMIC_MRNA_PROCESSING_BODY	61	0.0200516	0.712569	0.793734	0.100325	-0.0657597	0.226512	0.341658	-0.466409	0.0112214	0.836668	0.886284	0.0524269	0.0229356	0.673456	0.759718	0.119348	0.0861816	0.112692	0.184692	0.733551	0.134955	0.0127498	0.032847	1.4835	-0.00550697	0.919415	0.939781	-0.0269735	-0.017684	0.745256	0.807011	-0.0931205	-0.0711331	0.190718	0.406491	-0.390949	-0.0202093	0.71041	0.815526	-0.0885622	-0.123203	0.0230841	0.187983	-0.725882	-0.120544	0.0262394	0.203226
612	GO_CYTOPLASMIC_PATTERN_RECOGNITION_RECEPTOR_SIGNALING_PATHWAY	32	-0.112885	0.037527	0.0740511	-1.13047	-0.114613	0.0346883	0.0804058	-1.09471	-0.142391	0.00860262	0.0229438	-1.63934	-0.143621	0.00804122	0.0233132	-1.6324	0.13572	0.0122984	0.0329023	1.48277	0.140638	0.00946272	0.0258127	1.58817	-0.157486	0.00363113	0.0101424	-1.99386	-0.164341	0.00239377	0.00732348	-2.13528	-0.0194812	0.720263	0.841447	-0.0749735	-0.00516959	0.924299	0.956238	-0.019434	-0.0265444	0.625568	0.807008	-0.0931221	-0.017294	0.750564	0.893817
613	GO_CYTOPLASMIC_REGION	208	0.171797	0.00147379	0.00470044	2.32786	0.115884	0.0326694	0.0764934	1.11638	0.156641	0.00378473	0.0118484	1.92634	0.12922	0.0171293	0.0425353	1.37125	-0.145056	0.00738336	0.0219961	-1.65765	-0.166017	0.00213153	0.00807067	-2.09309	0.143475	0.00806041	0.0198486	1.70227	0.138395	0.0106254	0.0254022	1.59513	-0.0175193	0.747547	0.858054	-0.0664855	-0.0477132	0.380461	0.546866	-0.262119	0.082641	0.128306	0.385615	0.413846	0.0684288	0.208177	0.504568
614	GO_CYTOPLASMIC_SEQUESTERING_OF_PROTEIN	37	-0.0399789	0.462296	0.571905	-0.242676	-0.0832503	0.125464	0.218563	-0.660423	0.014773	0.785968	0.846848	0.0721943	0.0035847	0.947467	0.963784	0.0160203	0.0368473	0.498114	0.594142	0.22611	0.00759777	0.888934	0.919873	0.036272	-0.0364983	0.502194	0.598365	-0.223034	-0.0442713	0.415616	0.518643	-0.285132	-0.165164	0.00227454	0.0398292	-1.3998	-0.147642	0.00642726	0.0894732	-1.04831	-0.113413	0.036639	0.228612	-0.640901	-0.115826	0.0328068	0.21987
615	GO_CYTOPLASMIC_SEQUESTERING_OF_TRANSCRIPTION_FACTOR	17	-0.0303181	0.577274	0.678156	-0.168671	-0.102228	0.0597277	0.122503	-0.911852	-0.0434708	0.424105	0.525976	-0.279034	-0.0386593	0.477212	0.590548	-0.228745	0.0767089	0.15808	0.24148	0.617118	0.0494443	0.363217	0.461178	0.336131	-0.0794772	0.143571	0.216924	-0.663693	-0.0782089	0.150087	0.226613	-0.644715	-0.106683	0.0493928	0.189118	-0.723266	-0.0620156	0.253979	0.425356	-0.371248	-0.126212	0.0199667	0.175153	-0.756582	-0.120483	0.026369	0.20351
616	GO_CYTOPLASMIC_SIDE_OF_MEMBRANE	112	0.025477	0.639699	0.730652	0.136289	0.122014	0.0244522	0.0610616	1.21423	0.258402	1.36938e-06	1.89941e-05	4.72138	0.219375	4.50383e-05	0.000320714	3.49388	-0.232298	1.51201e-05	0.000167038	-3.77719	-0.24796	3.69593e-06	5.16497e-05	-4.28693	0.21447	6.7041e-05	0.000352779	3.4525	0.202784	0.000166835	0.000793854	3.10026	-0.0573663	0.291537	0.509686	-0.292698	-0.0922104	0.0895772	0.244377	-0.61194	0.0322333	0.553637	0.768016	0.11463	-0.00529997	0.922435	0.966099
617	GO_CYTOPLASMIC_STRESS_GRANULE	29	0.133767	0.0136179	0.031553	1.50096	0.0987645	0.0689479	0.136114	0.866098	0.0680614	0.210521	0.304475	0.516448	0.0604167	0.266446	0.380293	0.419881	-0.00196959	0.971123	0.980641	-0.00848978	-0.00548346	0.919718	0.943137	-0.0254254	0.0885148	0.103226	0.165985	0.77993	0.0824567	0.129117	0.201064	0.696666	0.0176411	0.745728	0.856292	0.0673779	0.0490815	0.366751	0.534096	0.272381	0.0288257	0.596164	0.792618	0.100936	0.0216743	0.690315	0.867545
618	GO_CYTOPLASMIC_TRANSLATION	40	0.0813735	0.134236	0.213447	0.670709	-0.0902398	0.0966601	0.177384	-0.751086	-0.0843827	0.120391	0.195503	-0.708847	-0.0394284	0.468487	0.583018	-0.234318	0.1103	0.0421403	0.0853987	1.06855	0.128425	0.0178834	0.0426161	1.37043	-0.0969833	0.074125	0.125958	-0.899773	-0.0989218	0.0685054	0.119095	-0.924105	-0.0329487	0.54468	0.718845	-0.143365	0.0132229	0.807963	0.881378	0.0548379	-0.0456696	0.40103	0.662747	-0.178652	-0.0303901	0.576369	0.804747
619	GO_CYTOPLASMIC_VESICLE_PART	378	-0.103654	0.0562107	0.104496	-0.980901	-0.0314274	0.563601	0.671531	-0.172934	0.0163751	0.763529	0.829358	0.0812578	-0.00450909	0.933981	0.954228	-0.0203477	-0.0440637	0.418	0.517654	-0.285961	-0.069009	0.204337	0.292534	-0.533824	-0.0143666	0.791822	0.837777	-0.0768716	-0.0180605	0.740026	0.802721	-0.0954351	-0.0726028	0.181693	0.393593	-0.404952	-0.0918015	0.0910141	0.246903	-0.607474	-0.00484006	0.929147	0.968609	-0.0138513	-0.0231591	0.670459	0.853927
620	GO_CYTOSKELETAL_PROTEIN_BINDING	587	0.282058	1.2264e-07	1.28743e-06	5.89028	0.219643	4.40575e-05	0.000523256	3.28129	0.284683	9.24994e-08	2.45373e-06	5.61017	0.272297	3.41283e-07	8.7392e-06	5.05853	-0.262891	8.81703e-07	1.62748e-05	-4.78849	-0.284561	9.37276e-08	2.86354e-06	-5.5431	0.290633	4.82803e-08	1.02828e-06	5.98789	0.287222	7.02157e-08	1.54754e-06	5.81036	-0.0110207	0.83955	0.914037	-0.039036	-0.0370972	0.495394	0.649896	-0.187156	0.107632	0.0473568	0.252787	0.597245	0.0903338	0.0963245	0.35745
621	GO_CYTOSKELETON_DEPENDENT_CYTOKINESIS	38	0.367404	3.65504e-12	1.85956e-10	9.73059	0.237824	9.87367e-06	0.000179264	3.74651	0.191042	0.000405684	0.00185851	2.73084	0.218464	5.05741e-05	0.000352269	3.45313	-0.118768	0.0286008	0.0629104	-1.20128	-0.147814	0.00636502	0.0188609	-1.72444	0.250104	3.25959e-06	2.85096e-05	4.54501	0.245306	5.05986e-06	4.36943e-05	4.35957	0.11576	0.0329068	0.149821	0.824426	0.131383	0.0153959	0.12446	0.904971	0.114989	0.0340947	0.225432	0.646985	0.123373	0.0229469	0.193628
622	GO_CYTOSKELETON_DEPENDENT_INTRACELLULAR_TRANSPORT	102	0.24344	5.60469e-06	3.68379e-05	4.4337	0.209526	9.92016e-05	0.000900539	3.0455	0.31695	2.26517e-09	1.55216e-07	6.80906	0.313129	3.59932e-09	3.25408e-07	6.48757	-0.295183	2.90711e-08	1.13969e-06	-5.94321	-0.257895	1.4384e-06	2.4321e-05	-4.61402	0.30773	6.84924e-09	2.2345e-07	6.65082	0.302587	1.24914e-08	4.16068e-07	6.38084	0.00530324	0.922387	0.961679	0.0169698	-0.0257263	0.636426	0.76175	-0.118188	0.0945826	0.0815959	0.313861	0.503263	0.0726977	0.181121	0.473645
623	GO_CYTOSKELETON_ORGANIZATION	640	0.309356	5.95069e-09	9.48257e-08	7.02307	0.258581	1.39504e-06	4.75386e-05	4.32295	0.297676	2.30049e-08	8.25458e-07	6.0833	0.288059	6.70079e-08	2.8271e-06	5.54866	-0.263162	8.90927e-07	1.63768e-05	-4.78577	-0.277492	2.07339e-07	5.30428e-06	-5.27537	0.317405	2.26249e-09	1.00228e-07	6.99901	0.311087	4.84532e-09	2.08202e-07	6.68151	0.0181697	0.738884	0.853111	0.0689944	0.011796	0.828681	0.894289	0.0485219	0.118156	0.0296245	0.209862	0.678067	0.0962549	0.0767594	0.326652
624	GO_CYTOSOLIC_CALCIUM_ION_TRANSPORT	30	-0.00273226	0.959948	0.974689	-0.0111338	0.124894	0.0213062	0.0545902	1.26289	0.181267	0.00079935	0.00329647	2.48195	0.148957	0.0059663	0.0181032	1.74224	-0.204545	0.000150463	0.00105134	-2.97826	-0.213173	7.71783e-05	0.000594609	-3.22577	0.17135	0.00153799	0.00494432	2.30589	0.162885	0.00261877	0.00787588	2.1037	-0.00215614	0.968389	0.986534	-0.00588776	-0.0522663	0.336451	0.507242	-0.294784	0.0998087	0.0660531	0.289661	0.53811	0.0709619	0.19169	0.486501
625	GO_CYTOSOLIC_LARGE_RIBOSOMAL_SUBUNIT	57	-0.0372597	0.493506	0.602766	-0.219851	-0.128578	0.0176933	0.0471034	-1.32695	-0.13611	0.0119982	0.0299618	-1.52343	-0.117212	0.0307122	0.0682679	-1.16578	0.13758	0.0110981	0.0304236	1.51679	0.165222	0.00224051	0.00834775	2.07843	-0.155467	0.00405808	0.0111938	-1.95102	-0.158735	0.00333792	0.00969002	-2.01368	-0.0486941	0.370734	0.580747	-0.236013	-0.0171915	0.752115	0.845437	-0.0729186	-0.041972	0.440461	0.692175	-0.159784	-0.0340191	0.531871	0.771762
626	GO_CYTOSOLIC_PART	188	-0.0542791	0.318325	0.43072	-0.365805	-0.141673	0.0088992	0.0275688	-1.55958	-0.127256	0.0189049	0.0440088	-1.35646	-0.103151	0.0574227	0.113971	-0.943207	0.13019	0.0163068	0.0407439	1.38994	0.161552	0.00281218	0.0100064	1.99972	-0.161636	0.00279785	0.00814353	-2.08919	-0.164563	0.00233454	0.00716703	-2.14466	-0.0600558	0.269466	0.488491	-0.311143	-0.0305806	0.574162	0.712875	-0.146987	-0.0552045	0.310131	0.589818	-0.229282	-0.0494806	0.363047	0.655645
627	GO_CYTOSOLIC_RIBOSOME	103	-0.0710737	0.19109	0.285476	-0.54443	-0.140774	0.00934569	0.0286912	-1.54225	-0.137302	0.0112633	0.0285613	-1.54422	-0.116401	0.0318952	0.0703882	-1.1525	0.142417	0.00854397	0.0247708	1.60606	0.177097	0.00104016	0.00453981	2.34296	-0.164673	0.00231864	0.00695906	-2.15745	-0.1688	0.00178713	0.00572525	-2.24221	-0.060238	0.268013	0.487763	-0.311791	-0.0239436	0.659983	0.77922	-0.10834	-0.0610184	0.261851	0.548059	-0.261173	-0.0557043	0.305765	0.60872
628	GO_CYTOSOLIC_SMALL_RIBOSOMAL_SUBUNIT	39	-0.0228678	0.674214	0.758457	-0.120069	-0.103837	0.0558052	0.115468	-0.937539	-0.106339	0.0501326	0.0962251	-1.01671	-0.0831355	0.125987	0.213841	-0.669909	0.107935	0.0467721	0.0927902	1.0325	0.143781	0.0079704	0.0225446	1.64696	-0.123995	0.0222633	0.0461951	-1.3354	-0.126132	0.0200461	0.0429006	-1.36754	-0.0272759	0.616071	0.771975	-0.112397	0.00150215	0.977975	0.988015	0.00523629	-0.0297102	0.584934	0.787289	-0.103866	-0.0213479	0.694743	0.870886
629	GO_CYTOSOLIC_TRANSPORT	160	0.166593	0.00205558	0.00629317	2.20113	0.16735	0.00195965	0.00862949	2.06401	0.339327	1.31455e-10	2.07981e-08	7.68198	0.315745	2.62314e-09	2.90513e-07	6.53683	-0.338878	1.3951e-10	2.37561e-08	-7.62423	-0.302761	1.22414e-08	5.59068e-07	-6.25254	0.296836	2.41251e-08	5.84011e-07	6.23358	0.286152	7.88926e-08	1.70485e-06	5.76831	-0.0728925	0.179951	0.390584	-0.408285	-0.108995	0.0446054	0.175803	-0.754975	0.0440281	0.418377	0.677407	0.16915	0.00570059	0.916592	0.965669
630	GO_DAMAGED_DNA_BINDING	59	0.283214	1.08355e-07	1.15945e-06	5.93575	0.186157	0.000560325	0.0033818	2.47085	0.231063	1.68295e-05	0.000148358	3.82869	0.216613	5.64086e-05	0.000385039	3.4145	-0.115687	0.0329677	0.0701769	-1.15381	-0.101595	0.0613096	0.113293	-0.945798	0.24547	4.65328e-06	3.8245e-05	4.41743	0.23654	1.04212e-05	7.83804e-05	4.10579	0.0642307	0.237518	0.457083	0.340005	0.0786883	0.147661	0.317953	0.497636	0.0651915	0.230559	0.514077	0.288972	0.0622177	0.252573	0.551453
631	GO_DEACETYLASE_ACTIVITY	51	0.0221051	0.684635	0.768609	0.114295	0.132337	0.014609	0.0404487	1.3931	0.14636	0.0068637	0.0192566	1.71542	0.113178	0.0369859	0.07923	1.10111	-0.177882	0.000987005	0.00456352	-2.3407	-0.145682	0.00712994	0.0207527	-1.68293	0.160129	0.00306753	0.00877286	2.05686	0.149205	0.00584208	0.015405	1.81234	0.0152992	0.778648	0.87815	0.0564312	-0.0325278	0.550018	0.69557	-0.157659	0.114494	0.03483	0.227554	0.642916	0.0903291	0.0963419	0.35745
632	GO_DEAMINASE_ACTIVITY	21	-0.200385	0.000205641	0.00085219	-3.06946	-0.191848	0.000383042	0.00253265	-2.59643	-0.267158	6.35853e-07	1.08758e-05	-4.96354	-0.242102	6.75473e-06	7.91626e-05	-4.10148	0.213761	7.36719e-05	0.000602152	3.22029	0.205343	0.000141617	0.000954889	3.02005	-0.285657	9.50096e-08	1.73922e-06	-5.75964	-0.282493	1.32787e-07	2.58002e-06	-5.58838	-0.0230898	0.671236	0.810018	-0.0915055	-0.0154154	0.776901	0.86344	-0.0637677	-0.0515592	0.343036	0.61797	-0.209032	-0.0414477	0.446003	0.712003
633	GO_DEATH_RECEPTOR_ACTIVITY	16	-0.296083	3.0639e-08	3.85599e-07	-6.41386	-0.210451	9.55466e-05	0.000872724	-3.05912	-0.214818	6.77447e-05	0.000431812	-3.36471	-0.193601	0.000337829	0.00165735	-2.78059	0.222192	3.73204e-05	0.000357082	3.44723	0.200296	0.000207009	0.00127411	2.89479	-0.255433	1.97955e-06	1.94444e-05	-4.71121	-0.250984	3.004e-06	2.93768e-05	-4.53199	-0.100358	0.0645702	0.221911	-0.65382	-0.0630067	0.246458	0.42041	-0.376327	-0.129503	0.0169387	0.164347	-0.784238	-0.123702	0.0225827	0.192429
634	GO_DEATH_RECEPTOR_BINDING	17	-0.164106	0.00242885	0.00724079	-2.14021	-0.151442	0.0051754	0.018254	-1.73864	-0.160898	0.00295686	0.00965995	-2.01502	-0.158619	0.00339322	0.0114486	-1.94125	0.180198	0.000859146	0.00408371	2.38895	0.172339	0.00144302	0.00591755	2.22786	-0.179182	0.000919813	0.00321862	-2.49233	-0.171871	0.00148732	0.00491703	-2.3083	-0.0192287	0.72374	0.84395	-0.0736832	-0.00424174	0.937856	0.963973	-0.0159353	-0.0808254	0.136884	0.397765	-0.400373	-0.0583176	0.28344	0.583204
635	GO_DECIDUALIZATION	16	-0.283203	1.23222e-07	1.29048e-06	-5.88925	-0.139789	0.00990661	0.029977	-1.52321	-0.05592	0.303728	0.406255	-0.391202	-0.0678886	0.211683	0.318316	-0.497142	0.162789	0.00263429	0.00969801	2.01332	0.1689	0.00179862	0.00703748	2.15258	-0.0905729	0.0954315	0.1558	-0.807433	-0.111506	0.0399321	0.0762168	-1.11795	-0.165086	0.00228562	0.0398634	-1.39943	-0.0997629	0.066178	0.210854	-0.676019	-0.161858	0.00278876	0.0664185	-1.17771	-0.166872	0.00204422	0.0599729
636	GO_DEFENSE_RESPONSE	609	-0.191431	0.000401403	0.00153294	-2.81447	-0.173486	0.00136473	0.00656489	-2.18277	-0.178861	0.000957181	0.00380638	-2.41949	-0.17072	0.00163174	0.00623163	-2.2054	0.167137	0.00204857	0.00807399	2.09291	0.166434	0.00214092	0.0080993	2.09155	-0.205738	0.000139382	0.000647915	-3.18848	-0.209498	0.000104266	0.00053337	-3.27297	-0.0953116	0.0801568	0.247625	-0.606205	-0.0583477	0.284778	0.454691	-0.342283	-0.0912657	0.0938985	0.33777	-0.471379	-0.0919895	0.0913108	0.348612
637	GO_DEFENSE_RESPONSE_TO_BACTERIUM	68	-0.0740734	0.172895	0.263658	-0.578959	-0.142987	0.00832627	0.026197	-1.58175	-0.189681	0.00044675	0.00200314	-2.69829	-0.164695	0.00234187	0.00841403	-2.075	0.218805	4.91979e-05	0.000435893	3.36062	0.22406	3.19884e-05	0.000297083	3.52712	-0.206605	0.00012861	0.00060418	-3.21883	-0.213673	7.41862e-05	0.000404735	-3.39283	-0.0361276	0.506548	0.69174	-0.160057	0.0170256	0.75431	0.847475	0.0718732	-0.0554043	0.308214	0.588276	-0.230419	-0.035822	0.510152	0.758523
638	GO_DEFENSE_RESPONSE_TO_GRAM_NEGATIVE_BACTERIUM	18	-0.269292	5.14191e-07	4.42304e-06	-5.35428	-0.230897	1.7997e-05	0.000277794	-3.55628	-0.274537	3.02766e-07	6.11029e-06	-5.21394	-0.264157	8.54643e-07	1.74935e-05	-4.75712	0.277589	2.21336e-07	5.42356e-06	5.26572	0.258954	1.41541e-06	2.40241e-05	4.61935	-0.303472	1.33744e-08	3.71101e-07	-6.43051	-0.305072	1.11425e-08	3.98556e-07	-6.39951	-0.0463108	0.394446	0.605264	-0.218055	-0.0154648	0.776204	0.863097	-0.0639402	-0.109803	0.0430808	0.244608	-0.611529	-0.0902838	0.0964972	0.357726
639	GO_DEFENSE_RESPONSE_TO_GRAM_POSITIVE_BACTERIUM	37	0.110527	0.0417171	0.0809401	1.09184	-0.0492534	0.365073	0.48773	-0.31182	-0.017406	0.749002	0.815453	-0.0886008	0.00787347	0.884931	0.918305	0.0370129	0.0934344	0.0853837	0.148609	0.827954	0.121703	0.0248736	0.0552608	1.25758	-0.0380606	0.484065	0.581613	-0.235366	-0.0457209	0.400501	0.503897	-0.297658	-0.0597523	0.271747	0.489366	-0.310366	0.00584556	0.914436	0.952269	0.0212405	-0.0543879	0.317184	0.594636	-0.225749	-0.0350737	0.519033	0.763546
640	GO_DEFENSE_RESPONSE_TO_OTHER_ORGANISM	254	-0.0480187	0.377228	0.488061	-0.311526	-0.0895822	0.0991227	0.180929	-0.742493	-0.133796	0.0135972	0.0332243	-1.47854	-0.124697	0.0215128	0.0512069	-1.29067	0.139341	0.0101476	0.0283264	1.54781	0.172091	0.00146632	0.00599242	2.2224	-0.134917	0.0128264	0.0292288	-1.53419	-0.138692	0.0105065	0.0252162	-1.59832	-0.0173785	0.749385	0.859155	-0.0659282	0.0266696	0.623938	0.751713	0.123948	-0.0356263	0.512467	0.738261	-0.13179	-0.0243147	0.654893	0.844101
641	GO_DEFENSE_RESPONSE_TO_VIRUS	110	-0.250574	3.12072e-06	2.19441e-05	-4.65868	-0.159971	0.00312771	0.0123712	-1.90759	-0.20659	0.000128757	0.000729405	-3.13703	-0.238363	9.41611e-06	9.81491e-05	-4.00811	0.144844	0.00751555	0.0223149	1.6514	0.164275	0.00240352	0.00884351	2.05338	-0.222918	3.51551e-05	0.000208204	-3.68151	-0.220071	4.43917e-05	0.000263613	-3.57903	-0.0592253	0.276003	0.493619	-0.306608	-0.0660977	0.224006	0.400121	-0.397808	-0.0560467	0.302632	0.582137	-0.234975	-0.0569779	0.29466	0.59494
642	GO_DEMETHYLASE_ACTIVITY	31	-0.105691	0.0515547	0.0968974	-1.01369	0.0694406	0.201407	0.313134	0.50427	0.087027	0.109168	0.18005	0.744608	0.0687679	0.205816	0.311927	0.505947	-0.126314	0.0198665	0.0475161	-1.32316	-0.0822821	0.129932	0.205462	-0.687268	0.0963358	0.076084	0.128941	0.889609	0.0881683	0.104586	0.169593	0.770592	-0.00724116	0.894116	0.947146	-0.0235831	-0.0222291	0.682813	0.795597	-0.0993067	0.0469877	0.387567	0.655908	0.183157	0.0284175	0.601379	0.817847
643	GO_DEMETHYLATION	42	-0.184355	0.000647515	0.00233972	-2.63084	0.00438066	0.935825	0.958323	0.0184881	0.00575183	0.915803	0.942613	0.0256666	-0.0195857	0.718827	0.796101	-0.0990319	-0.0740456	0.173057	0.259967	-0.585082	-0.0302473	0.578164	0.662683	-0.178694	0.0109831	0.840009	0.876617	0.05719	0.00827221	0.879147	0.909109	0.0413842	-0.00531157	0.922226	0.961679	-0.0169698	-0.0295863	0.586502	0.721924	-0.141509	0.0220651	0.685027	0.843058	0.0741428	0.00926876	0.86472	0.945826
644	GO_DENDRITE	293	0.0184884	0.733967	0.811448	0.0907391	0.135528	0.0124229	0.0355285	1.44942	0.270062	4.76015e-07	8.74188e-06	5.0584	0.233626	1.42371e-05	0.000135054	3.86949	-0.265124	7.7729e-07	1.47154e-05	-4.83223	-0.280451	1.64465e-07	4.46982e-06	-5.34971	0.219568	4.6247e-05	0.000261653	3.58227	0.207652	0.000118679	0.000592058	3.22764	-0.088883	0.101795	0.279401	-0.553772	-0.131671	0.0151709	0.12377	-0.907386	0.0449131	0.408884	0.66931	0.174373	0.00443714	0.934999	0.9689
645	GO_DENDRITE_DEVELOPMENT	55	0.244216	5.58489e-06	3.68379e-05	4.4337	0.262739	9.81663e-07	3.69957e-05	4.43185	0.404246	5.23123e-15	1.15872e-11	10.936	0.36431	5.71983e-12	4.22314e-09	8.37436	-0.369662	2.62419e-12	1.61491e-09	-8.79185	-0.354836	2.16616e-11	7.99673e-09	-8.09709	0.387129	1.6971e-13	9.39771e-11	10.027	0.373483	1.48341e-12	6.57151e-10	9.18234	-0.0213339	0.694933	0.824245	-0.0839437	-0.0710428	0.191183	0.366603	-0.435803	0.101226	0.0622853	0.283654	0.547211	0.0639	0.239814	0.536021
646	GO_DENDRITE_MORPHOGENESIS	33	0.203786	0.000159362	0.000685412	3.16405	0.195639	0.000291512	0.0020829	2.68133	0.34564	7.50654e-11	1.44582e-08	7.83988	0.320207	1.87966e-09	2.54568e-07	6.5942	-0.330092	5.57047e-10	6.66951e-08	-7.17591	-0.315667	3.23861e-09	1.96535e-07	-6.70656	0.314887	3.55285e-09	1.41794e-07	6.84834	0.306825	9.11227e-09	3.47994e-07	6.45843	-0.016658	0.75945	0.865989	-0.0624877	-0.0543143	0.31784	0.488391	-0.311233	0.0762598	0.160534	0.43176	0.364758	0.0451912	0.405986	0.692582
647	GO_DENDRITIC_CELL_DIFFERENTIATION	17	-0.190565	0.000419673	0.00159721	-2.79664	-0.224301	3.13558e-05	0.000418393	-3.37842	-0.204167	0.000154842	0.000838569	-3.07646	-0.182997	0.000710665	0.00310784	-2.50754	0.245525	4.96056e-06	6.59918e-05	4.18051	0.201714	0.000186231	0.00116963	2.93195	-0.248528	3.7697e-06	3.18127e-05	-4.4974	-0.248205	3.88341e-06	3.6066e-05	-4.4429	-0.129261	0.0171474	0.104632	-0.980334	-0.0857682	0.114403	0.278924	-0.554514	-0.164984	0.00230016	0.0622202	-1.20607	-0.151728	0.00509079	0.0976287
648	GO_DENDRITIC_SHAFT	26	0.180583	0.000837142	0.00290638	2.53665	0.245789	4.84291e-06	0.000113855	3.94365	0.30504	1.11842e-08	5.16104e-07	6.28726	0.273566	3.34206e-07	8.60776e-06	5.06511	-0.303606	1.31711e-08	6.07791e-07	-6.21625	-0.300239	1.9274e-08	7.95714e-07	-6.09924	0.310981	5.6272e-09	2.01036e-07	6.69673	0.303972	1.26334e-08	4.17657e-07	6.37918	0.00645039	0.905622	0.954761	0.0201054	-0.041452	0.445956	0.607872	-0.216188	0.144761	0.00755036	0.106863	0.971173	0.113689	0.0361821	0.229928
649	GO_DEOXYRIBONUCLEASE_ACTIVITY	60	0.275806	2.65895e-07	2.5062e-06	5.60098	0.188488	0.000485888	0.0030098	2.52146	0.205505	0.000139873	0.000774207	3.11114	0.202127	0.000180556	0.000992389	3.00332	-0.123368	0.0229526	0.0531522	-1.27448	-0.102282	0.0595931	0.110784	-0.955524	0.231059	1.77505e-05	0.000114128	3.94261	0.224911	2.98064e-05	0.000187294	3.72748	0.0719121	0.185798	0.399945	0.398	0.0798997	0.141449	0.311441	0.506624	0.0702979	0.195888	0.469581	0.32829	0.0736469	0.175387	0.468334
650	GO_DEOXYRIBONUCLEOSIDE_TRIPHOSPHATE_METABOLIC_PROCESS	15	0.245503	4.97048e-06	3.34131e-05	4.47608	0.0393841	0.468987	0.589226	0.229718	0.0132	0.808289	0.863032	0.0639731	0.0425655	0.433826	0.550515	0.259231	0.0378368	0.48664	0.583441	0.234003	-0.00339846	0.950193	0.966113	-0.014972	0.0257469	0.635992	0.713407	0.146663	0.0385091	0.478926	0.578577	0.237639	0.0608227	0.263241	0.483409	0.315685	0.0734609	0.176482	0.34988	0.45608	0.0394659	0.468063	0.711463	0.147847	0.0657578	0.2264	0.521015
651	GO_DEOXYRIBONUCLEOTIDE_METABOLIC_PROCESS	31	0.297655	2.57334e-08	3.34307e-07	6.47585	0.127178	0.0190331	0.0498324	1.30249	0.113088	0.0371836	0.0758394	1.12011	0.131009	0.0156924	0.039747	1.4007	-0.0684794	0.207728	0.300828	-0.521681	-0.0955316	0.0785751	0.136988	-0.863316	0.140511	0.00952777	0.0227905	1.64225	0.151341	0.00520553	0.0139845	1.85435	0.0980745	0.0709171	0.232117	0.634293	0.102437	0.0592053	0.199149	0.700822	0.087834	0.105912	0.357343	0.446915	0.103099	0.0575783	0.284361
652	GO_DEOXYRIBOSE_PHOSPHATE_CATABOLIC_PROCESS	20	0.0774407	0.154141	0.238923	0.621741	-0.00543522	0.920422	0.947808	-0.0232798	-0.0789994	0.146	0.2279	-0.642256	-0.082098	0.130795	0.219895	-0.657786	0.0406948	0.454313	0.551551	0.258415	0.00630506	0.907739	0.934747	0.0293058	-0.0455787	0.40197	0.502179	-0.299141	-0.0305898	0.573865	0.663246	-0.178325	0.0953661	0.0790958	0.245079	0.610694	0.0684147	0.208159	0.383442	0.4163	0.0815216	0.133527	0.391997	0.406717	0.103317	0.0570494	0.282546
653	GO_DEPHOSPHORYLATION	220	0.0171258	0.753032	0.825726	0.083164	0.0787488	0.147349	0.246882	0.607511	0.165633	0.0021835	0.00758066	2.12029	0.144027	0.00781827	0.0227413	1.64319	-0.141994	0.00874436	0.0251379	-1.59967	-0.158396	0.00340668	0.0116177	-1.93488	0.139571	0.0099746	0.023617	1.62677	0.130289	0.016225	0.0360827	1.4427	-0.0871859	0.108545	0.290022	-0.537569	-0.0851864	0.116922	0.281655	-0.550283	0.0142631	0.793288	0.904833	0.0434314	-0.00371111	0.945644	0.974885
654	GO_DETECTION_OF_ABIOTIC_STIMULUS	36	0.0482248	0.375182	0.48584	0.313507	0.0782883	0.149672	0.249687	0.602605	0.182883	0.000716181	0.00301586	2.52059	0.167675	0.00194351	0.00719161	2.14317	-0.182473	0.000736501	0.00359157	-2.44472	-0.195877	0.000286525	0.00164418	-2.78405	0.149457	0.00579883	0.0150315	1.823	0.143426	0.00812788	0.0203178	1.69212	-0.0530024	0.329683	0.543541	-0.264767	-0.069421	0.201534	0.375598	-0.425276	0.00442005	0.935249	0.971204	0.0126898	-0.0209495	0.700162	0.870977
655	GO_DETECTION_OF_STIMULUS	97	0.138797	0.0104481	0.0251926	1.59873	0.0064339	0.905862	0.93739	0.0280795	0.176431	0.00110451	0.00428832	2.36771	0.166426	0.00210221	0.00763971	2.11692	-0.129511	0.0169319	0.0419509	-1.37726	-0.087477	0.107343	0.176317	-0.753705	0.112763	0.0377355	0.0720863	1.14215	0.101324	0.0620306	0.10948	0.960664	-0.0917154	0.091312	0.26456	-0.577476	-0.0926808	0.0879432	0.242131	-0.61595	-0.0522092	0.33698	0.61332	-0.212313	-0.068615	0.206828	0.503637
656	GO_DETOXIFICATION	47	-0.209025	0.000106739	0.00048748	-3.31204	-0.204298	0.000153314	0.00123778	-2.90736	-0.224664	3.04256e-05	0.000234068	-3.63066	-0.203676	0.000160698	0.000906871	-3.04245	0.198066	0.000244122	0.00152534	2.81663	0.179769	0.000884347	0.00400169	2.39776	-0.251137	2.96177e-06	2.63996e-05	-4.5784	-0.248009	3.9537e-06	3.65892e-05	-4.43665	-0.0391649	0.471466	0.668136	-0.175135	-0.027758	0.609847	0.738956	-0.131381	-0.0988387	0.0687388	0.293482	-0.532418	-0.0940633	0.0832937	0.334565
657	GO_DEVELOPMENT_OF_PRIMARY_SEXUAL_CHARACTERISTICS	140	0.119334	0.0278462	0.0579965	1.2366	0.056763	0.296488	0.418427	0.37838	0.112801	0.0376694	0.0765483	1.11606	0.077906	0.151675	0.246758	0.607729	-0.101857	0.0606652	0.114021	-0.943016	-0.0866002	0.110921	0.181294	-0.741617	0.0974141	0.0728447	0.124212	0.905837	0.0855175	0.115469	0.183752	0.735767	-0.0401944	0.459885	0.657827	-0.181888	-0.033446	0.538622	0.686693	-0.163237	0.0293518	0.589473	0.789326	0.102743	0.00600158	0.912161	0.964231
658	GO_DEVELOPMENTAL_CELL_GROWTH	54	0.160916	0.00295352	0.00852334	2.06939	0.194528	0.000315964	0.00219736	2.6581	0.255981	1.87938e-06	2.4344e-05	4.61361	0.225245	2.89891e-05	0.000229324	3.63955	-0.256145	1.85038e-06	2.98079e-05	-4.52567	-0.282182	1.37196e-07	3.89602e-06	-5.40938	0.246031	4.73726e-06	3.86817e-05	4.41249	0.235356	1.22533e-05	9.01694e-05	4.04494	-0.0500527	0.357336	0.56881	-0.245033	-0.0897504	0.0984881	0.258473	-0.587585	0.0997895	0.0661055	0.289661	0.53811	0.0695511	0.20069	0.496913
659	GO_DEVELOPMENTAL_GROWTH	233	0.176837	0.00105833	0.00356805	2.44757	0.179822	0.000866199	0.00470252	2.32767	0.234193	1.28161e-05	0.000119527	3.92253	0.218561	4.81405e-05	0.00033959	3.46904	-0.237601	9.48469e-06	0.00011356	-3.94477	-0.248399	3.54802e-06	5.02164e-05	-4.29915	0.232094	1.53907e-05	0.000101158	3.995	0.224102	3.04371e-05	0.000190178	3.72084	-0.0364714	0.502701	0.68935	-0.16156	-0.0597534	0.271889	0.442304	-0.354279	0.0842807	0.120878	0.376841	0.423842	0.0591864	0.276472	0.577675
660	GO_DEVELOPMENTAL_GROWTH_INVOLVED_IN_MORPHOGENESIS	76	0.113873	0.0358801	0.0715341	1.14549	0.174603	0.00124547	0.00617854	2.20911	0.224143	3.17706e-05	0.000242244	3.61575	0.209747	0.000100925	0.000619865	3.2077	-0.253281	2.42425e-06	3.66534e-05	-4.43589	-0.258484	1.48062e-06	2.49398e-05	-4.60311	0.21634	6.00004e-05	0.000326137	3.4866	0.208997	0.000106969	0.000544682	3.26386	-0.0350868	0.518877	0.699733	-0.155067	-0.0714956	0.188364	0.362963	-0.440137	0.0924717	0.0886644	0.325152	0.487914	0.0586526	0.28068	0.582975
661	GO_DEVELOPMENTAL_INDUCTION	19	-0.0925899	0.0882563	0.151482	-0.819638	-0.0675839	0.213745	0.327303	-0.485049	-0.0784724	0.148715	0.231079	-0.636239	-0.101914	0.0605211	0.118895	-0.924836	0.0572286	0.292539	0.392236	0.406453	0.043508	0.423708	0.52101	0.283154	-0.102215	0.0597614	0.105391	-0.977195	-0.0964912	0.0756101	0.129776	-0.886805	-0.015278	0.778838	0.87815	-0.0564312	-0.033359	0.539679	0.687429	-0.162772	-0.0296531	0.585656	0.787392	-0.103809	-0.0256346	0.637466	0.834204
662	GO_DEVELOPMENTAL_MATURATION	115	-0.15504	0.00419725	0.0115777	-1.93638	-0.00872407	0.8726	0.914429	-0.0388499	0.0821404	0.130596	0.20901	0.679834	0.0429649	0.429522	0.546619	0.262315	-0.121017	0.0257059	0.0583686	-1.23382	-0.132153	0.0148009	0.036919	-1.43275	0.0356031	0.512742	0.607612	0.216373	0.0331682	0.542002	0.635708	0.196743	-0.142307	0.00864204	0.0722531	-1.14114	-0.150639	0.00541986	0.08293	-1.08129	-0.0490348	0.367207	0.638997	-0.194501	-0.0781778	0.150249	0.439053
663	GO_DEVELOPMENTAL_PIGMENTATION	26	0.139867	0.00986486	0.0239591	1.62053	0.0527954	0.331577	0.4535	0.343422	0.145987	0.00705247	0.0196956	1.70563	0.161285	0.00288792	0.0100263	1.99886	-0.147225	0.00657965	0.019869	-1.70182	-0.157097	0.00371618	0.0124169	-1.90599	0.129248	0.0171588	0.0373347	1.42789	0.121804	0.0247535	0.0509563	1.2928	-0.0888079	0.102086	0.279548	-0.553544	-0.085927	0.113732	0.277747	-0.55635	-0.0362971	0.504555	0.733326	-0.134703	-0.0439144	0.419389	0.699402
664	GO_DEVELOPMENTAL_PROCESS_INVOLVED_IN_REPRODUCTION	377	0.100209	0.0649505	0.117504	0.929947	0.0756248	0.164132	0.266827	0.573771	0.146788	0.00670069	0.0189377	1.72267	0.141977	0.00875216	0.0248062	1.60544	-0.144578	0.00758263	0.0224539	-1.64871	-0.152817	0.00474228	0.0149991	-1.82393	0.143899	0.00787358	0.0194643	1.71076	0.13669	0.0116354	0.0274467	1.56151	-0.0841197	0.121593	0.309513	-0.50932	-0.0415835	0.444707	0.607464	-0.216479	-0.00124889	0.981695	0.991544	-0.00368822	-0.0239622	0.659736	0.848123
[truncated: 3,766 more rows]
[truncated: 9 more columns]
