# Supplementary material for: Functional annotation of human long noncoding RNAs via molecular phenotyping
Source: Genome Res. 2020 Jul;30(7):1060–72. doi: 10.1101/gr.254219.119 (PMC7397864; doi:10.1101/gr.254219.119)
Supplement: Supplemental Material [file supp_gr.254219.119_Supplemental_Table_S7.xlsx]

## Sheet: Info
	Supplemental Tables S7. Oligo information for MKI67 staining assay.
	Table S7A. siRNAs used in MKI67 staining assay.			Table S7BA. ASOs used in MKI67 staining assay.
	ID	Description		ID	Description
1	siRNA	experimental ID	1	ASO	experimental ID
2	target.si	siRNA lncRNA knockdown target	2	target.ASO	ASO lncRNA knockdown target
3	invitrogen id	assay ID provided by Invitrogen	3	perturb_id	FANTOM 6 ASO id
4	si_seq_sense	siRNA oligo sense sequence	4	oligo_seq	ASO oligo sequences
5	si_seq_antisense	siRNA oligo antisense sequence

## Sheet: Table S7A
	siRNA	target.si	invitrogen id	si_seq_sense	si_seq_antisense
1	X1-1	RP11-195F19.9.si1	s539325	CCGUCAUUCUCAGGACGAGtt	CUCGUCCUGAGAAUGACGGag
2	X1-4	RP11-195F19.9.si2	s539322	CCUUGAAUGUUGGACUCCAtt	UGGAGUCCAACAUUCAAGGgc
3	X2-3	A1BG-AS1.si1	n263844	CCCUCUGUUUGGUCCCAUUtt	AAUGGGACCAAACAGAGGGag
4	X2-4	A1BG-AS1.si2	n263847	UACCUAGUGUGGUUUCUAUtt	AUAGAAACCACACUAGGUAtt
5	X3-2	CATG00000089639.1.si1	s539319	CAAUGGGUGAAGUGGAUUAtt	UAAUCCACUUCACCCAUUGta
6	X3-3	CATG00000089639.1.si2	s539321	ACUUAGCAGUGGGAUGUUAtt	UAACAUCCCACUGCUAAGUtg
7	X4-3	ZNF213-AS1.si1	n319855	GGAUCUCACCCAAAGCUUAtt	UAAGCUUUGGGUGAGAUCCag
8	X4-4	ZNF213-AS1.si2	n319859	GCUAUGUGCUGUGACCAGAtt	UCUGGUCACAGCACAUAGCag

## Sheet: Table S7B
	ASO	target.ASO	perturb_id	oligo_seq
1	A1-4	RP11-195F19.9.ASO1	ASO_G0230074_05	cgggaatgaggagata
2	A1-5	RP11-195F19.9.ASO2	ASO_G0230074_07	gattcaatcatgccgc
3	A2-1	A1BG-AS1.ASO1	ASO_G0268895_01	tggtcttcatcacgtc
4	A2-3	A1BG-AS1.ASO2	ASO_G0268895_03	agggtgcaacgaggct
5	A3-1	CATG00000089639.1.ASO1	ASO_G0223811_01	gtaggagatggcgtat
6	A3-3	CATG00000089639.1.ASO2	ASO_G0223811_04	gggatgacacgaagtt
7	A4-2	ZNF213-AS1.ASO1	ASO_G0263072_02	ggttggctggtaagaa
9	A4-4	ZNF213-AS1.ASO2	ASO_G0263072_05	gggtcgcaaggaaatg
