# Supplementary material for: Functional annotation of human long noncoding RNAs via molecular phenotyping
Source: Genome Res. 2020 Jul;30(7):1060–72. doi: 10.1101/gr.254219.119 (PMC7397864; doi:10.1101/gr.254219.119)
Supplement: Supplemental Material [file supp_gr.254219.119_Supplemental_Table_S8.xlsx]

## Sheet: Info
	Supplemental Table S8. Statistics on Hi-C data used.
	(details in tab Table S8)

## Sheet: Table S8
A) Summary of read processing before mapping.
Library ID	# Total Reads		# Not Truncated		# Truncated Reads		Average Length Truncated		# Too Short To Map
	Read_1	Read_2	Read_1	Read_2	Read_1	Read_2	Read_1	Read_2	Read_1	Read_2
HChi10001	348932265	348932265	319267875	319753489	29664390	29178776	30.9	30.69	3581034	3554641
HChi10002	342011197	342011197	316154623	316572264	25856574	25438933	31.07	30.83	3015667	3005160
HChi10003	335359740	335359740	309287568	309758124	26072172	25601616	31.05	30.81	3050182	3036113
B) Summary of read mapping.
Library ID	# Unique Alignments Reads		# Multiple Alignments Reads		# Failed To Align Reads		# Paired Reads
	Read_1	Read_2	Read_1	Read_2	Read_1	Read_2	Read_1	Read_2
HChi10001	253526866	249430898	89018729	89245141	2805636	6701585	184590792	184590792
HChi10002	248434270	244544350	86350132	86699306	4211128	7762381	181556216	181556216
HChi10003	242921256	238994127	85779833	86027118	3608469	7302382	176478150	176478150
C) Summary of read filtering based on different potential artifcats.
Library ID	# Valid Pairs	# Invalid Pairs	# Same Circularised	# Same Dangling Ends	# Same Fragment Internal	# Re-Ligation	# Contiguous Sequence	# Wrong Size
HChi10001	169173341	15417451	1813286	2227543	6621405	1043325	56837	3655055
HChi10002	145273866	36282350	2178865	2744576	12909670	1061070	53976	17334193
HChi10003	152311272	24166878	2526314	1754462	8266302	1064408	56564	10498828
D) Summary of valid reads after de-duplication step.
Library ID	# Deduplication Read Pairs Uniques	# Deduplication Cis Close Uniques	# Deduplication Cis Far Uniques	# Deduplication Trans Uniques
HChi10001	166260188	1502206	54595524	110162458
HChi10002	142984792	1359571	45207826	96417395
HChi10003	150078665	1393216	45883812	102801637
