# Supplementary material for: Functional annotation of human long noncoding RNAs via molecular phenotyping
Source: Genome Res. 2020 Jul;30(7):1060–72. doi: 10.1101/gr.254219.119 (PMC7397864; doi:10.1101/gr.254219.119)
Supplement: Supplemental Material [file supp_gr.254219.119_Supplemental_Table_S9.xlsx]

## Sheet: Info
	Supplemental Table S9. FISH probes sequences for RP11-398K22 and TUG1.
	ID	Description
	Probe name	oligo ID
	5’ overhang	sequence for the secondary probe with Atto 647N fluorescence dye
	Targeting sequence	sequence to probe the lncRNA target
	3’ overhang	sequence for the secondary probe with Atto 647N fluorescence dye
	Overhang sequences were adopted from Moffit et al. 2016 PNAS 113(39) 11046-11051.

## Sheet: Table S9
Probe name	5' overhang	Targeting sequence	3' overhang
RP11-398K22_01	GGGATGTATTGAAGGAGGAT	GAGGAGGGCTCTGGGTTG	GGGATGTATTGAAGGAGGAT
RP11-398K22_02	GGGATGTATTGAAGGAGGAT	CTGTCTCCTACACAGAGC	GGGATGTATTGAAGGAGGAT
RP11-398K22_03	GGGATGTATTGAAGGAGGAT	GAGCTGCTGGGCTCTCTG	GGGATGTATTGAAGGAGGAT
RP11-398K22_04	GGGATGTATTGAAGGAGGAT	CCTTGCTTCCTGGACTCA	GGGATGTATTGAAGGAGGAT
RP11-398K22_05	GGGATGTATTGAAGGAGGAT	TCTGGGTCATTGCCACTG	GGGATGTATTGAAGGAGGAT
RP11-398K22_06	GGGATGTATTGAAGGAGGAT	GAAGACTCTGCTTGAGCC	GGGATGTATTGAAGGAGGAT
RP11-398K22_07	GGGATGTATTGAAGGAGGAT	CCTTCTGGAACACCAGGA	GGGATGTATTGAAGGAGGAT
RP11-398K22_08	GGGATGTATTGAAGGAGGAT	TGGAGCAGGACCTTGAAC	GGGATGTATTGAAGGAGGAT
RP11-398K22_09	GGGATGTATTGAAGGAGGAT	CAGAATCTAGCTGTCCCA	GGGATGTATTGAAGGAGGAT
RP11-398K22_10	GGGATGTATTGAAGGAGGAT	AGGATCTCAACATTGCCC	GGGATGTATTGAAGGAGGAT
RP11-398K22_11	GGGATGTATTGAAGGAGGAT	TATTTCTGGCACCAGCAC	GGGATGTATTGAAGGAGGAT
RP11-398K22_12	GGGATGTATTGAAGGAGGAT	CGTCAATCAGCCTTTTGT	GGGATGTATTGAAGGAGGAT
TUG1_01	GGGATGTATTGAAGGAGGAT	AAAGAAGCCTATTCACCACC	GGGATGTATTGAAGGAGGAT
TUG1_02	ATAGGAAATGGTGGTAGTGT	CTACTGATTTTGAGGTTCCG	ATAGGAAATGGTGGTAGTGT
TUG1_03	GGGATGTATTGAAGGAGGAT	AGAACACAAGGAGGGCCAAG	GGGATGTATTGAAGGAGGAT
TUG1_04	ATAGGAAATGGTGGTAGTGT	CATCTTGGACATCCTAGTAT	ATAGGAAATGGTGGTAGTGT
TUG1_05	GGGATGTATTGAAGGAGGAT	TTTGTTGGATAATGGCCTGA	GGGATGTATTGAAGGAGGAT
TUG1_06	ATAGGAAATGGTGGTAGTGT	TGAGCACCACTCCACAAAAC	ATAGGAAATGGTGGTAGTGT
TUG1_07	GGGATGTATTGAAGGAGGAT	ATGTGTTTGTGTTCACTTGC	GGGATGTATTGAAGGAGGAT
TUG1_08	ATAGGAAATGGTGGTAGTGT	TCTCTGCCCTTTAGGAAAAG	ATAGGAAATGGTGGTAGTGT
TUG1_09	GGGATGTATTGAAGGAGGAT	TTTTGAGGTACATCCGGATT	GGGATGTATTGAAGGAGGAT
TUG1_10	ATAGGAAATGGTGGTAGTGT	AAGCATCTTATCACCACAGT	ATAGGAAATGGTGGTAGTGT
TUG1_11	GGGATGTATTGAAGGAGGAT	TTATCTGCTCCAACTATTGC	GGGATGTATTGAAGGAGGAT
TUG1_12	ATAGGAAATGGTGGTAGTGT	TGGAAATCTGGAGTCCATGG	ATAGGAAATGGTGGTAGTGT
TUG1_13	GGGATGTATTGAAGGAGGAT	CATCGTGACAAGCTCTTTCG	GGGATGTATTGAAGGAGGAT
TUG1_14	ATAGGAAATGGTGGTAGTGT	TCACAGCAAGGTCAACAGTC	ATAGGAAATGGTGGTAGTGT
TUG1_15	GGGATGTATTGAAGGAGGAT	TTCACTTTGGATGGAGCATC	GGGATGTATTGAAGGAGGAT
TUG1_16	ATAGGAAATGGTGGTAGTGT	AAGGTAGTCAGAAGGTCCAG	ATAGGAAATGGTGGTAGTGT
TUG1_17	GGGATGTATTGAAGGAGGAT	CTGTAGGCTGATGGAATAGC	GGGATGTATTGAAGGAGGAT
TUG1_18	ATAGGAAATGGTGGTAGTGT	GGCAAAAATCCAGGTACCAG	ATAGGAAATGGTGGTAGTGT
TUG1_19	GGGATGTATTGAAGGAGGAT	GTCAGTAGTAAGGTGGTAGG	GGGATGTATTGAAGGAGGAT
TUG1_20	ATAGGAAATGGTGGTAGTGT	AGCTTTAGCTATTTGGCTTG	ATAGGAAATGGTGGTAGTGT
TUG1_21	GGGATGTATTGAAGGAGGAT	ACAAACTAGGCCTTTGTTGT	GGGATGTATTGAAGGAGGAT
TUG1_22	ATAGGAAATGGTGGTAGTGT	AAGATGTTGCCTTTCTTCAG	ATAGGAAATGGTGGTAGTGT
TUG1_23	GGGATGTATTGAAGGAGGAT	ATTTGAGATTGTGGGGTGTG	GGGATGTATTGAAGGAGGAT
TUG1_24	ATAGGAAATGGTGGTAGTGT	AAAAACAGGGTCCAGTGACC	ATAGGAAATGGTGGTAGTGT
TUG1_25	GGGATGTATTGAAGGAGGAT	TGTTTTCTCATTCAGTAGGC	GGGATGTATTGAAGGAGGAT
TUG1_26	ATAGGAAATGGTGGTAGTGT	CCTTTGATTTGATCCCAATG	ATAGGAAATGGTGGTAGTGT
TUG1_27	GGGATGTATTGAAGGAGGAT	GATGCTATGAGGAGTTCACT	GGGATGTATTGAAGGAGGAT
TUG1_28	ATAGGAAATGGTGGTAGTGT	TGGTTCCTGAGTAATTCCAA	ATAGGAAATGGTGGTAGTGT
TUG1_29	GGGATGTATTGAAGGAGGAT	GGACTCCTTGGTAGAATTTC	GGGATGTATTGAAGGAGGAT
TUG1_30	ATAGGAAATGGTGGTAGTGT	TAGAGGTTCTACCTTGATGT	ATAGGAAATGGTGGTAGTGT
TUG1_31	GGGATGTATTGAAGGAGGAT	GCCACAAAGCCTTTGGAAAA	GGGATGTATTGAAGGAGGAT
TUG1_32	ATAGGAAATGGTGGTAGTGT	GGAATGCCATTCAGGTCAAA	ATAGGAAATGGTGGTAGTGT
TUG1_33	GGGATGTATTGAAGGAGGAT	TGCTGAGTGGAGGTACAGAA	GGGATGTATTGAAGGAGGAT
TUG1_34	ATAGGAAATGGTGGTAGTGT	TGTCTTCTTGCACTTTTCTA	ATAGGAAATGGTGGTAGTGT
TUG1_35	GGGATGTATTGAAGGAGGAT	AAATGATCATTCCTGGGGTC	GGGATGTATTGAAGGAGGAT
TUG1_36	ATAGGAAATGGTGGTAGTGT	GGCTGTTAATCTAGGTTCAC	ATAGGAAATGGTGGTAGTGT
TUG1_37	GGGATGTATTGAAGGAGGAT	CCATTCTAGGAATCACTGGA	GGGATGTATTGAAGGAGGAT
TUG1_38	ATAGGAAATGGTGGTAGTGT	GCATAGAATTGTTCTCTGGC	ATAGGAAATGGTGGTAGTGT
TUG1_39	GGGATGTATTGAAGGAGGAT	CTTAAGGGAGTCTGTCAGTG	GGGATGTATTGAAGGAGGAT
TUG1_40	ATAGGAAATGGTGGTAGTGT	CAAGTACCAGTAGAGCATCT	ATAGGAAATGGTGGTAGTGT
TUG1_41	GGGATGTATTGAAGGAGGAT	AGGTATTCATGGAGGGTCAA	GGGATGTATTGAAGGAGGAT
TUG1_42	ATAGGAAATGGTGGTAGTGT	ATGAGGCACCAGCTTCAAAA	ATAGGAAATGGTGGTAGTGT
TUG1_43	GGGATGTATTGAAGGAGGAT	CAAGTTGCTCTAATATGGCC	GGGATGTATTGAAGGAGGAT
TUG1_44	ATAGGAAATGGTGGTAGTGT	AAGTAGAGTACCATGGCTGA	ATAGGAAATGGTGGTAGTGT
TUG1_45	GGGATGTATTGAAGGAGGAT	GGCTTTCATAGTTATCTCTT	GGGATGTATTGAAGGAGGAT
TUG1_46	ATAGGAAATGGTGGTAGTGT	ATAGATATTGAGCCCCTTTA	ATAGGAAATGGTGGTAGTGT
TUG1_47	GGGATGTATTGAAGGAGGAT	CTGGTTGAGTCATACAGTGA	GGGATGTATTGAAGGAGGAT
TUG1_48	ATAGGAAATGGTGGTAGTGT	CCAAGGGGCAATATAACTGC	ATAGGAAATGGTGGTAGTGT
3' Atto647N labeled probe RS0015	ATCCTCCTTCAATACATCCC
3' Atto647N labeled probe RS0083	ACACTACCACCATTTCCTAT
